# Supplementary material for: A Novel Method of Predicting Protein Disordered Regions Based on Sequence Features
Source: Biomed Res Int. 2013 Apr 22;2013:414327. doi: 10.1155/2013/414327 (PMC3654632; doi:10.1155/2013/414327)
Supplement: Supplementary file 1 — Online Supporting Information S1: The training dataset contains 43,903 ordered samples and 43,903 disordered samples of amino acid residues by 21-residue sliding window. Online Supporting Information S2: The testing dataset contains 54,582 ordered samples and 11,734 disordered samples of amino acid residues by 21-residue sliding window. Online Supporting Information S3: After calculating the Cramer's V coefficient between features and target variables and removing the features with the Cramer's V coefficient small than 0.1, 175 features remained. Online Supporting Information S4: The mRMR ranks of the 175 features. Online Supporting Information S5: The IFS results on training set evaluated by 10-fold cross validation, ACC (Accuracy), MCC (Matthews correlation coefficient), SN (sensitivity), SP (specificity) included. Online Supporting Information S6: The optimal feature subset includes 128 features. Online Supporting Information S7: The prediction specific outcome of each residue on testing set. The first 5 columns are the output by WEKA program and the last is the prediction result after scanning the sequence. [file 414327.f1.txt]

Online Supporting Information S1.
The training dataset contains 43,903 ordered samples and 43,903 disordered samples of amino acid residues by 21-sliding window.

(1)43,903 disordered data samples:

ID           site
>DP00001     1
>DP00001     2
>DP00001     3
>DP00001     4
>DP00001     5
>DP00001     6
>DP00001     7
>DP00001     8
>DP00001     9
>DP00001     10
>DP00001     11
>DP00001     12
>DP00001     13
>DP00001     14
>DP00001     15
>DP00001     16
>DP00001     17
>DP00001     18
>DP00001     19
>DP00001     20
>DP00001     21
>DP00001     22
>DP00001     23
>DP00001     24
>DP00001     25
>DP00001     26
>DP00001     27
>DP00001     28
>DP00001     29
>DP00001     30
>DP00001     31
>DP00001     32
>DP00001     33
>DP00001     34
>DP00001     35
>DP00001     36
>DP00001     37
>DP00001     38
>DP00001     39
>DP00001     40
>DP00001     41
>DP00001     42
>DP00001     43
>DP00001     44
>DP00001     45
>DP00001     46
>DP00001     47
>DP00001     48
>DP00001     49
>DP00001     50
>DP00001     51
>DP00001     52
>DP00001     53
>DP00001     54
>DP00001     55
>DP00001     56
>DP00001     57
>DP00001     58
>DP00001     59
>DP00001     60
>DP00001     61
>DP00001     62
>DP00001     63
>DP00001     64
>DP00001     65
>DP00001     66
>DP00001     67
>DP00001     68
>DP00001     69
>DP00001     70
>DP00001     71
>DP00001     72
>DP00001     73
>DP00001     74
>DP00001     75
>DP00001     76
>DP00001     77
>DP00001     78
>DP00001     79
>DP00001     80
>DP00001     81
>DP00001     82
>DP00001     83
>DP00001     84
>DP00001     85
>DP00001     86
>DP00001     87
>DP00001     88
>DP00001     89
>DP00001     90
>DP00001     91
>DP00001     92
>DP00001     93
>DP00001     94
>DP00001     95
>DP00001     96
>DP00001     97
>DP00001     98
>DP00001     99
>DP00001     100
>DP00001     101
>DP00001     102
>DP00001     103
>DP00001     104
>DP00001     105
>DP00001     106
>DP00001     107
>DP00001     108
>DP00002     1
>DP00002     2
>DP00002     3
>DP00002     4
>DP00002     5
>DP00002     6
>DP00002     7
>DP00002     8
>DP00002     9
>DP00002     10
>DP00002     11
>DP00002     12
>DP00002     13
>DP00002     14
>DP00002     15
>DP00002     16
>DP00002     17
>DP00002     18
>DP00002     19
>DP00002     20
>DP00002     21
>DP00002     22
>DP00002     23
>DP00002     24
>DP00002     25
>DP00002     26
>DP00002     27
>DP00002     28
>DP00002     29
>DP00002     30
>DP00002     31
>DP00002     32
>DP00002     33
>DP00002     34
>DP00002     35
>DP00002     36
>DP00002     37
>DP00002     38
>DP00002     39
>DP00002     40
>DP00002     41
>DP00002     42
>DP00002     43
>DP00002     44
>DP00002     45
>DP00002     46
>DP00002     47
>DP00002     48
>DP00002     49
>DP00002     50
>DP00002     51
>DP00002     52
>DP00002     53
>DP00002     54
>DP00002     55
>DP00002     56
>DP00002     57
>DP00002     58
>DP00002     59
>DP00002     60
>DP00002     61
>DP00002     62
>DP00002     63
>DP00002     64
>DP00002     65
>DP00002     66
>DP00002     67
>DP00002     68
>DP00002     69
>DP00002     70
>DP00002     71
>DP00002     72
>DP00002     73
>DP00002     74
>DP00002     75
>DP00002     76
>DP00002     77
>DP00002     78
>DP00002     79
>DP00002     80
>DP00002     81
>DP00002     82
>DP00002     83
>DP00002     84
>DP00002     85
>DP00002     86
>DP00002     87
>DP00002     88
>DP00002     89
>DP00002     90
>DP00002     91
>DP00002     92
>DP00002     93
>DP00002     94
>DP00002     95
>DP00002     96
>DP00002     97
>DP00002     98
>DP00002     99
>DP00002     100
>DP00002     101
>DP00002     102
>DP00002     103
>DP00002     104
>DP00002     105
>DP00002     106
>DP00002     107
>DP00002     108
>DP00002     109
>DP00002     110
>DP00003     297
>DP00003     298
>DP00003     299
>DP00003     300
>DP00003     301
>DP00003     302
>DP00003     303
>DP00003     304
>DP00003     305
>DP00003     306
>DP00003     307
>DP00003     308
>DP00003     309
>DP00003     310
>DP00003     311
>DP00003     312
>DP00003     313
>DP00003     314
>DP00003     315
>DP00003     316
>DP00003     317
>DP00003     318
>DP00003     319
>DP00003     320
>DP00003     321
>DP00003     322
>DP00003     323
>DP00003     324
>DP00003     325
>DP00003     326
>DP00003     327
>DP00003     328
>DP00003     329
>DP00003     330
>DP00003     331
>DP00003     401
>DP00003     402
>DP00003     403
>DP00003     404
>DP00003     405
>DP00003     406
>DP00003     453
>DP00003     454
>DP00003     455
>DP00003     456
>DP00003     457
>DP00003     458
>DP00003     459
>DP00003     460
>DP00003     461
>DP00003     462
>DP00003     463
>DP00003     464
>DP00005     1
>DP00005     2
>DP00005     3
>DP00005     4
>DP00005     5
>DP00005     6
>DP00005     7
>DP00005     8
>DP00005     9
>DP00005     10
>DP00005     11
>DP00005     12
>DP00005     13
>DP00005     14
>DP00005     15
>DP00005     16
>DP00005     17
>DP00005     18
>DP00005     19
>DP00005     20
>DP00005     21
>DP00005     22
>DP00005     23
>DP00005     24
>DP00005     25
>DP00005     26
>DP00005     27
>DP00005     28
>DP00005     29
>DP00005     30
>DP00005     31
>DP00005     32
>DP00005     33
>DP00005     34
>DP00005     35
>DP00005     36
>DP00005     37
>DP00005     38
>DP00005     39
>DP00005     40
>DP00005     41
>DP00005     42
>DP00005     43
>DP00005     44
>DP00005     45
>DP00005     46
>DP00005     47
>DP00005     48
>DP00005     49
>DP00005     50
>DP00005     51
>DP00005     52
>DP00005     53
>DP00005     54
>DP00005     55
>DP00005     56
>DP00005     57
>DP00005     58
>DP00005     59
>DP00005     60
>DP00005     61
>DP00005     62
>DP00005     63
>DP00005     64
>DP00005     65
>DP00005     66
>DP00005     67
>DP00005     68
>DP00005     69
>DP00005     70
>DP00005     71
>DP00005     72
>DP00005     73
>DP00005     74
>DP00005     75
>DP00005     76
>DP00005     77
>DP00005     78
>DP00005     79
>DP00005     80
>DP00005     81
>DP00005     82
>DP00005     83
>DP00005     84
>DP00005     85
>DP00005     86
>DP00005     87
>DP00005     88
>DP00005     89
>DP00005     90
>DP00005     91
>DP00005     92
>DP00005     93
>DP00005     94
>DP00005     95
>DP00005     96
>DP00005     97
>DP00005     98
>DP00005     99
>DP00005     100
>DP00005     101
>DP00005     102
>DP00005     103
>DP00005     104
>DP00005     105
>DP00005     106
>DP00005     107
>DP00006     1
>DP00006     2
>DP00006     3
>DP00006     4
>DP00006     5
>DP00006     6
>DP00006     7
>DP00006     8
>DP00006     9
>DP00006     10
>DP00006     11
>DP00006     12
>DP00006     13
>DP00006     14
>DP00006     15
>DP00006     16
>DP00006     17
>DP00006     18
>DP00006     19
>DP00006     20
>DP00006     21
>DP00006     22
>DP00006     23
>DP00006     24
>DP00006     25
>DP00006     26
>DP00006     27
>DP00006     28
>DP00006     29
>DP00006     30
>DP00006     31
>DP00006     32
>DP00006     33
>DP00006     34
>DP00006     35
>DP00006     36
>DP00006     37
>DP00006     38
>DP00006     39
>DP00006     40
>DP00006     41
>DP00006     42
>DP00006     43
>DP00006     44
>DP00006     45
>DP00006     46
>DP00006     47
>DP00006     48
>DP00006     49
>DP00006     50
>DP00006     51
>DP00006     52
>DP00006     53
>DP00006     54
>DP00006     55
>DP00006     56
>DP00006     57
>DP00006     58
>DP00006     59
>DP00006     60
>DP00006     61
>DP00006     62
>DP00006     63
>DP00006     64
>DP00006     65
>DP00006     66
>DP00006     67
>DP00006     68
>DP00006     69
>DP00006     70
>DP00006     71
>DP00006     72
>DP00006     73
>DP00006     74
>DP00006     75
>DP00006     76
>DP00006     77
>DP00006     78
>DP00006     79
>DP00006     80
>DP00006     81
>DP00006     82
>DP00006     83
>DP00006     84
>DP00006     85
>DP00006     86
>DP00006     87
>DP00006     88
>DP00006     89
>DP00006     90
>DP00006     91
>DP00006     92
>DP00006     93
>DP00006     94
>DP00006     95
>DP00006     96
>DP00006     97
>DP00006     98
>DP00006     99
>DP00006     100
>DP00006     101
>DP00006     102
>DP00006     103
>DP00006     104
>DP00007     1
>DP00007     2
>DP00007     3
>DP00007     4
>DP00007     5
>DP00007     6
>DP00007     7
>DP00007     8
>DP00007     9
>DP00007     10
>DP00007     11
>DP00007     12
>DP00007     13
>DP00007     14
>DP00007     15
>DP00007     16
>DP00007     17
>DP00007     18
>DP00007     19
>DP00007     20
>DP00007     21
>DP00007     22
>DP00007     23
>DP00007     24
>DP00007     25
>DP00007     26
>DP00007     27
>DP00007     28
>DP00007     29
>DP00007     30
>DP00007     31
>DP00007     32
>DP00007     33
>DP00007     34
>DP00007     35
>DP00007     36
>DP00007     37
>DP00007     38
>DP00007     39
>DP00007     40
>DP00007     41
>DP00007     42
>DP00007     43
>DP00007     100
>DP00007     101
>DP00007     102
>DP00007     103
>DP00007     104
>DP00007     105
>DP00007     106
>DP00007     107
>DP00007     108
>DP00007     109
>DP00007     110
>DP00007     111
>DP00007     112
>DP00007     123
>DP00007     124
>DP00007     125
>DP00007     126
>DP00007     127
>DP00008     1
>DP00008     2
>DP00008     3
>DP00008     4
>DP00008     5
>DP00008     6
>DP00008     7
>DP00008     8
>DP00008     9
>DP00008     10
>DP00008     11
>DP00008     12
>DP00008     13
>DP00008     14
>DP00008     15
>DP00008     16
>DP00008     17
>DP00008     18
>DP00008     19
>DP00008     20
>DP00008     21
>DP00008     22
>DP00008     23
>DP00008     24
>DP00008     25
>DP00008     26
>DP00008     27
>DP00008     28
>DP00008     29
>DP00008     30
>DP00008     31
>DP00008     32
>DP00008     33
>DP00008     34
>DP00008     35
>DP00008     36
>DP00008     37
>DP00008     38
>DP00008     39
>DP00008     40
>DP00008     41
>DP00008     42
>DP00008     43
>DP00008     44
>DP00008     45
>DP00008     46
>DP00008     47
>DP00008     48
>DP00008     49
>DP00008     50
>DP00008     51
>DP00008     52
>DP00008     53
>DP00008     54
>DP00008     55
>DP00008     56
>DP00008     57
>DP00008     58
>DP00008     59
>DP00008     60
>DP00008     61
>DP00008     62
>DP00008     63
>DP00008     64
>DP00008     65
>DP00008     66
>DP00008     67
>DP00008     68
>DP00008     69
>DP00008     70
>DP00008     71
>DP00008     72
>DP00008     73
>DP00008     74
>DP00008     75
>DP00008     76
>DP00008     77
>DP00008     78
>DP00008     79
>DP00008     80
>DP00008     81
>DP00008     82
>DP00008     83
>DP00008     84
>DP00008     85
>DP00008     86
>DP00008     87
>DP00008     88
>DP00008     89
>DP00008     90
>DP00008     91
>DP00008     92
>DP00008     93
>DP00008     94
>DP00008     95
>DP00008     96
>DP00008     97
>DP00008     98
>DP00008     99
>DP00008     100
>DP00008     101
>DP00008     102
>DP00008     103
>DP00008     104
>DP00008     105
>DP00008     106
>DP00008     107
>DP00008     108
>DP00008     109
>DP00008     110
>DP00008     111
>DP00008     112
>DP00008     113
>DP00008     114
>DP00008     115
>DP00008     116
>DP00008     117
>DP00008     118
>DP00008     119
>DP00008     120
>DP00008     121
>DP00008     122
>DP00008     123
>DP00008     124
>DP00008     125
>DP00008     126
>DP00008     127
>DP00008     128
>DP00008     129
>DP00008     130
>DP00008     131
>DP00008     132
>DP00008     133
>DP00008     134
>DP00008     135
>DP00008     136
>DP00008     137
>DP00008     138
>DP00008     139
>DP00008     140
>DP00008     141
>DP00008     142
>DP00008     143
>DP00008     144
>DP00008     145
>DP00008     146
>DP00008     147
>DP00008     148
>DP00008     149
>DP00008     150
>DP00008     151
>DP00008     152
>DP00008     153
>DP00008     154
>DP00008     155
>DP00008     156
>DP00008     157
>DP00008     158
>DP00008     159
>DP00008     160
>DP00008     161
>DP00008     162
>DP00008     163
>DP00008     164
>DP00008     165
>DP00008     166
>DP00008     167
>DP00008     168
>DP00008     169
>DP00008     170
>DP00008     171
>DP00008     172
>DP00008     173
>DP00008     174
>DP00008     175
>DP00008     176
>DP00008     177
>DP00008     178
>DP00008     179
>DP00008     180
>DP00008     181
>DP00008     182
>DP00008     183
>DP00008     184
>DP00008     185
>DP00008     186
>DP00008     187
>DP00008     188
>DP00008     189
>DP00008     190
>DP00008     191
>DP00008     192
>DP00008     193
>DP00008     194
>DP00008     195
>DP00008     196
>DP00008     197
>DP00008     198
>DP00008     199
>DP00008     200
>DP00008     201
>DP00008     202
>DP00008     203
>DP00008     204
>DP00008     205
>DP00008     206
>DP00008     207
>DP00008     208
>DP00008     209
>DP00008     210
>DP00008     211
>DP00008     212
>DP00008     213
>DP00008     214
>DP00008     215
>DP00008     216
>DP00008     217
>DP00008     218
>DP00008     219
>DP00008     220
>DP00008     221
>DP00008     222
>DP00008     223
>DP00008     224
>DP00008     225
>DP00008     226
>DP00008     227
>DP00008     228
>DP00008     229
>DP00008     230
>DP00008     231
>DP00008     232
>DP00008     233
>DP00008     234
>DP00008     235
>DP00008     236
>DP00008     237
>DP00008     238
>DP00008     239
>DP00008     240
>DP00008     241
>DP00008     242
>DP00008     243
>DP00008     244
>DP00008     245
>DP00008     246
>DP00008     247
>DP00008     248
>DP00008     249
>DP00008     250
>DP00008     251
>DP00008     252
>DP00008     253
>DP00008     254
>DP00008     255
>DP00008     256
>DP00009     89
>DP00009     90
>DP00009     91
>DP00009     92
>DP00009     93
>DP00009     94
>DP00009     95
>DP00009     96
>DP00009     97
>DP00009     98
>DP00009     99
>DP00009     100
>DP00009     101
>DP00009     102
>DP00009     103
>DP00011     1
>DP00011     2
>DP00011     3
>DP00011     4
>DP00011     5
>DP00011     6
>DP00011     7
>DP00011     64
>DP00011     65
>DP00011     66
>DP00011     67
>DP00011     68
>DP00011     69
>DP00011     70
>DP00011     71
>DP00011     72
>DP00011     73
>DP00011     74
>DP00011     75
>DP00011     76
>DP00011     77
>DP00011     91
>DP00011     92
>DP00011     93
>DP00011     216
>DP00011     217
>DP00011     218
>DP00011     219
>DP00011     220
>DP00011     221
>DP00011     222
>DP00011     223
>DP00011     224
>DP00011     225
>DP00011     226
>DP00011     227
>DP00011     228
>DP00011     229
>DP00011     230
>DP00011     231
>DP00011     232
>DP00011     233
>DP00011     234
>DP00011     235
>DP00011     236
>DP00011     237
>DP00011     238
>DP00011     239
>DP00011     240
>DP00011     241
>DP00011     242
>DP00011     243
>DP00011     244
>DP00011     245
>DP00011     246
>DP00011     247
>DP00011     248
>DP00011     249
>DP00011     250
>DP00011     251
>DP00011     252
>DP00011     253
>DP00011     254
>DP00011     255
>DP00011     256
>DP00011     257
>DP00011     258
>DP00011     259
>DP00011     260
>DP00011     261
>DP00011     294
>DP00011     295
>DP00012     708
>DP00012     709
>DP00012     710
>DP00012     711
>DP00012     712
>DP00012     713
>DP00012     714
>DP00012     715
>DP00012     716
>DP00012     717
>DP00012     718
>DP00012     719
>DP00012     720
>DP00012     721
>DP00012     722
>DP00012     723
>DP00012     724
>DP00012     725
>DP00012     726
>DP00012     727
>DP00012     728
>DP00012     729
>DP00012     730
>DP00012     731
>DP00012     732
>DP00012     733
>DP00012     734
>DP00012     735
>DP00012     736
>DP00012     737
>DP00012     738
>DP00012     739
>DP00012     740
>DP00012     741
>DP00012     742
>DP00012     743
>DP00012     744
>DP00012     745
>DP00012     746
>DP00012     747
>DP00012     748
>DP00012     749
>DP00012     750
>DP00012     751
>DP00012     752
>DP00012     753
>DP00012     754
>DP00012     755
>DP00012     756
>DP00012     757
>DP00012     758
>DP00012     759
>DP00012     760
>DP00012     761
>DP00012     762
>DP00012     763
>DP00012     764
>DP00012     765
>DP00012     766
>DP00012     767
>DP00012     768
>DP00012     769
>DP00012     770
>DP00012     771
>DP00012     772
>DP00012     773
>DP00012     774
>DP00012     775
>DP00012     776
>DP00012     777
>DP00012     778
>DP00012     779
>DP00012     780
>DP00012     781
>DP00012     782
>DP00012     783
>DP00012     784
>DP00012     785
>DP00012     786
>DP00012     787
>DP00012     788
>DP00012     789
>DP00012     790
>DP00012     791
>DP00012     792
>DP00012     793
>DP00012     794
>DP00012     795
>DP00012     796
>DP00012     797
>DP00012     798
>DP00012     799
>DP00012     800
>DP00012     801
>DP00012     802
>DP00012     803
>DP00012     804
>DP00012     805
>DP00012     806
>DP00012     807
>DP00012     808
>DP00012     809
>DP00012     810
>DP00012     811
>DP00012     812
>DP00012     813
>DP00012     814
>DP00012     815
>DP00012     816
>DP00012     817
>DP00012     818
>DP00012     819
>DP00012     820
>DP00012     821
>DP00012     822
>DP00012     823
>DP00012     824
>DP00012     825
>DP00012     826
>DP00012     827
>DP00012     828
>DP00012     829
>DP00012     830
>DP00012     831
>DP00013     112
>DP00013     113
>DP00013     114
>DP00013     115
>DP00013     116
>DP00013     117
>DP00013     118
>DP00013     119
>DP00013     120
>DP00013     121
>DP00013     122
>DP00013     123
>DP00013     124
>DP00013     125
>DP00013     126
>DP00013     127
>DP00013     128
>DP00013     129
>DP00013     130
>DP00013     131
>DP00013     132
>DP00013     133
>DP00013     134
>DP00013     135
>DP00013     136
>DP00013     137
>DP00013     138
>DP00013     139
>DP00013     140
>DP00013     141
>DP00013     142
>DP00013     143
>DP00013     144
>DP00013     145
>DP00014     22
>DP00014     23
>DP00014     24
>DP00014     25
>DP00014     26
>DP00014     27
>DP00014     28
>DP00014     29
>DP00014     30
>DP00014     31
>DP00014     32
>DP00014     33
>DP00014     34
>DP00014     35
>DP00014     36
>DP00014     37
>DP00014     38
>DP00014     39
>DP00014     40
>DP00014     41
>DP00014     66
>DP00014     67
>DP00014     68
>DP00014     69
>DP00014     70
>DP00014     71
>DP00014     72
>DP00014     73
>DP00014     74
>DP00014     75
>DP00014     76
>DP00014     77
>DP00014     78
>DP00014     79
>DP00014     80
>DP00014     81
>DP00014     82
>DP00014     83
>DP00014     84
>DP00014     85
>DP00014     86
>DP00014     87
>DP00014     88
>DP00014     89
>DP00014     90
>DP00014     91
>DP00014     92
>DP00014     93
>DP00014     94
>DP00014     95
>DP00014     96
>DP00014     97
>DP00014     386
>DP00014     387
>DP00014     388
>DP00014     389
>DP00014     390
>DP00014     391
>DP00014     392
>DP00014     393
>DP00014     394
>DP00014     395
>DP00014     396
>DP00014     397
>DP00014     398
>DP00014     399
>DP00014     400
>DP00014     401
>DP00014     402
>DP00014     403
>DP00014     404
>DP00014     405
>DP00014     406
>DP00014     407
>DP00014     408
>DP00014     409
>DP00014     410
>DP00014     411
>DP00014     412
>DP00014     413
>DP00014     414
>DP00014     415
>DP00014     416
>DP00014     417
>DP00014     418
>DP00014     419
>DP00014     420
>DP00014     421
>DP00014     422
>DP00014     423
>DP00014     424
>DP00014     425
>DP00014     426
>DP00014     427
>DP00014     428
>DP00014     429
>DP00014     430
>DP00014     431
>DP00014     432
>DP00014     433
>DP00014     434
>DP00014     435
>DP00014     436
>DP00014     437
>DP00014     438
>DP00014     439
>DP00014     440
>DP00014     441
>DP00014     442
>DP00014     443
>DP00014     444
>DP00014     445
>DP00014     446
>DP00014     447
>DP00015     1
>DP00015     2
>DP00015     3
>DP00015     4
>DP00015     5
>DP00015     6
>DP00015     7
>DP00015     8
>DP00015     9
>DP00015     10
>DP00015     11
>DP00015     12
>DP00015     13
>DP00015     14
>DP00015     15
>DP00015     16
>DP00015     17
>DP00015     18
>DP00015     19
>DP00015     20
>DP00015     21
>DP00015     22
>DP00015     23
>DP00015     24
>DP00015     25
>DP00015     26
>DP00015     27
>DP00015     28
>DP00015     29
>DP00015     30
>DP00015     31
>DP00015     32
>DP00015     33
>DP00015     34
>DP00015     35
>DP00015     36
>DP00015     37
>DP00015     38
>DP00015     39
>DP00015     40
>DP00015     41
>DP00015     42
>DP00015     43
>DP00015     44
>DP00015     45
>DP00015     46
>DP00015     47
>DP00015     48
>DP00015     49
>DP00015     50
>DP00015     51
>DP00015     52
>DP00015     53
>DP00015     54
>DP00015     55
>DP00015     56
>DP00015     57
>DP00015     58
>DP00015     59
>DP00015     60
>DP00015     61
>DP00015     62
>DP00015     63
>DP00015     64
>DP00015     65
>DP00015     66
>DP00015     67
>DP00015     68
>DP00015     69
>DP00015     70
>DP00015     71
>DP00015     72
>DP00015     73
>DP00015     74
>DP00015     75
>DP00016     1
>DP00016     2
>DP00016     3
>DP00016     4
>DP00016     5
>DP00016     6
>DP00016     7
>DP00016     8
>DP00016     9
>DP00016     10
>DP00016     11
>DP00016     12
>DP00016     13
>DP00016     14
>DP00016     15
>DP00016     16
>DP00016     17
>DP00016     18
>DP00016     19
>DP00016     20
>DP00016     21
>DP00016     22
>DP00016     23
>DP00016     24
>DP00016     25
>DP00016     26
>DP00016     27
>DP00016     28
>DP00016     29
>DP00016     30
>DP00016     31
>DP00016     32
>DP00016     33
>DP00016     34
>DP00016     35
>DP00016     36
>DP00016     37
>DP00016     38
>DP00016     39
>DP00016     40
>DP00016     41
>DP00016     42
>DP00016     43
>DP00016     44
>DP00016     45
>DP00016     46
>DP00016     47
>DP00016     48
>DP00016     49
>DP00016     50
>DP00016     51
>DP00016     52
>DP00016     53
>DP00016     54
>DP00016     55
>DP00016     56
>DP00016     57
>DP00016     58
>DP00016     59
>DP00016     60
>DP00016     61
>DP00016     62
>DP00016     63
>DP00016     64
>DP00016     65
>DP00016     66
>DP00016     67
>DP00016     68
>DP00016     69
>DP00016     70
>DP00016     71
>DP00016     72
>DP00016     73
>DP00016     74
>DP00016     75
>DP00016     76
>DP00016     77
>DP00016     78
>DP00016     79
>DP00016     80
>DP00016     81
>DP00016     82
>DP00016     83
>DP00016     84
>DP00016     85
>DP00016     86
>DP00016     87
>DP00016     88
>DP00016     89
>DP00016     90
>DP00016     91
>DP00016     92
>DP00016     93
>DP00016     94
>DP00016     95
>DP00016     96
>DP00016     97
>DP00016     98
>DP00016     99
>DP00016     100
>DP00016     101
>DP00016     102
>DP00016     103
>DP00016     104
>DP00016     105
>DP00016     106
>DP00016     107
>DP00016     108
>DP00016     109
>DP00016     110
>DP00016     111
>DP00016     112
>DP00016     113
>DP00016     114
>DP00016     115
>DP00016     116
>DP00016     117
>DP00016     118
>DP00016     119
>DP00016     120
>DP00016     121
>DP00016     122
>DP00016     123
>DP00016     124
>DP00016     125
>DP00016     126
>DP00016     127
>DP00016     128
>DP00016     129
>DP00016     130
>DP00016     131
>DP00016     132
>DP00016     133
>DP00016     134
>DP00016     135
>DP00016     136
>DP00016     137
>DP00016     138
>DP00016     139
>DP00016     140
>DP00016     141
>DP00016     142
>DP00016     143
>DP00016     144
>DP00016     145
>DP00016     146
>DP00016     147
>DP00016     148
>DP00016     149
>DP00016     150
>DP00016     151
>DP00016     152
>DP00016     153
>DP00016     154
>DP00016     155
>DP00016     156
>DP00016     157
>DP00016     158
>DP00016     159
>DP00016     160
>DP00016     161
>DP00016     162
>DP00016     163
>DP00016     164
>DP00017     1
>DP00017     2
>DP00017     3
>DP00017     4
>DP00017     5
>DP00017     6
>DP00017     7
>DP00017     8
>DP00017     9
>DP00017     10
>DP00017     11
>DP00017     12
>DP00017     13
>DP00017     14
>DP00017     15
>DP00017     16
>DP00017     17
>DP00017     18
>DP00017     19
>DP00017     20
>DP00017     21
>DP00017     22
>DP00017     23
>DP00017     24
>DP00017     25
>DP00017     26
>DP00017     27
>DP00017     28
>DP00017     29
>DP00017     30
>DP00017     31
>DP00017     32
>DP00017     33
>DP00017     34
>DP00017     35
>DP00017     36
>DP00017     37
>DP00017     38
>DP00017     39
>DP00017     40
>DP00017     41
>DP00017     42
>DP00017     43
>DP00017     44
>DP00017     45
>DP00017     46
>DP00017     47
>DP00017     48
>DP00017     49
>DP00017     50
>DP00017     51
>DP00017     52
>DP00017     53
>DP00017     54
>DP00017     55
>DP00017     56
>DP00017     57
>DP00017     58
>DP00017     59
>DP00017     60
>DP00017     61
>DP00017     62
>DP00017     63
>DP00017     64
>DP00017     65
>DP00017     66
>DP00017     67
>DP00017     68
>DP00017     69
>DP00017     70
>DP00017     71
>DP00017     72
>DP00017     73
>DP00017     74
>DP00017     75
>DP00017     76
>DP00017     77
>DP00017     78
>DP00017     79
>DP00017     80
>DP00017     81
>DP00017     82
>DP00017     83
>DP00017     84
>DP00017     85
>DP00017     86
>DP00017     87
>DP00017     88
>DP00017     89
>DP00017     90
>DP00017     91
>DP00017     92
>DP00017     93
>DP00017     94
>DP00017     95
>DP00017     96
>DP00017     97
>DP00017     98
>DP00017     99
>DP00017     100
>DP00017     101
>DP00017     102
>DP00017     103
>DP00017     104
>DP00017     105
>DP00017     106
>DP00017     107
>DP00017     108
>DP00017     109
>DP00017     110
>DP00017     111
>DP00017     112
>DP00017     113
>DP00017     114
>DP00017     115
>DP00017     116
>DP00017     117
>DP00017     118
>DP00017     119
>DP00017     120
>DP00017     121
>DP00017     122
>DP00017     123
>DP00017     124
>DP00017     125
>DP00017     126
>DP00017     127
>DP00017     128
>DP00017     129
>DP00017     130
>DP00017     131
>DP00017     132
>DP00017     133
>DP00017     134
>DP00017     135
>DP00017     136
>DP00017     137
>DP00017     138
>DP00017     139
>DP00017     140
>DP00017     141
>DP00017     142
>DP00017     143
>DP00017     144
>DP00017     145
>DP00017     146
>DP00017     147
>DP00017     148
>DP00017     149
>DP00017     150
>DP00017     151
>DP00017     152
>DP00017     153
>DP00017     154
>DP00017     155
>DP00017     156
>DP00017     157
>DP00017     158
>DP00017     159
>DP00017     160
>DP00017     161
>DP00017     162
>DP00017     163
>DP00017     164
>DP00017     165
>DP00017     166
>DP00017     167
>DP00017     168
>DP00017     169
>DP00017     170
>DP00017     171
>DP00017     172
>DP00017     173
>DP00017     174
>DP00017     175
>DP00017     176
>DP00017     177
>DP00017     178
>DP00017     179
>DP00017     180
>DP00017     181
>DP00017     182
>DP00017     183
>DP00017     184
>DP00017     185
>DP00017     186
>DP00017     187
>DP00017     188
>DP00017     189
>DP00017     190
>DP00017     191
>DP00017     192
>DP00017     193
>DP00017     194
>DP00017     195
>DP00017     196
>DP00017     197
>DP00017     198
>DP00017     199
>DP00017     200
>DP00017     201
>DP00017     202
>DP00017     203
>DP00017     204
>DP00017     205
>DP00017     206
>DP00017     207
>DP00017     208
>DP00017     209
>DP00017     210
>DP00017     211
>DP00017     212
>DP00017     213
>DP00017     214
>DP00017     215
>DP00017     216
>DP00017     217
>DP00017     218
>DP00017     219
>DP00017     220
>DP00017     221
>DP00017     222
>DP00017     223
>DP00017     224
>DP00017     225
>DP00017     226
>DP00017     227
>DP00017     228
>DP00017     229
>DP00017     230
>DP00017     231
>DP00017     232
>DP00017     233
>DP00017     234
>DP00017     235
>DP00017     236
>DP00017     237
>DP00017     238
>DP00017     239
>DP00017     240
>DP00017     241
>DP00017     242
>DP00017     243
>DP00017     244
>DP00017     245
>DP00017     246
>DP00017     247
>DP00017     248
>DP00017     249
>DP00017     250
>DP00017     251
>DP00017     252
>DP00017     253
>DP00017     254
>DP00017     255
>DP00017     256
>DP00017     257
>DP00017     258
>DP00017     259
>DP00017     260
>DP00017     261
>DP00017     262
>DP00017     263
>DP00017     264
>DP00017     265
>DP00017     266
>DP00017     267
>DP00017     268
>DP00017     269
>DP00017     270
>DP00017     271
>DP00017     272
>DP00017     273
>DP00017     274
>DP00017     275
>DP00017     276
>DP00017     277
>DP00017     278
>DP00017     279
>DP00017     280
>DP00017     281
>DP00017     282
>DP00017     283
>DP00017     284
>DP00017     285
>DP00017     286
>DP00017     287
>DP00017     288
>DP00017     289
>DP00017     290
>DP00017     291
>DP00017     292
>DP00017     293
>DP00017     294
>DP00017     295
>DP00017     296
>DP00017     297
>DP00017     298
>DP00017     299
>DP00017     300
>DP00017     301
>DP00017     302
>DP00017     303
>DP00017     304
>DP00017     305
>DP00017     306
>DP00017     307
>DP00017     308
>DP00017     309
>DP00017     310
>DP00017     311
>DP00017     312
>DP00017     313
>DP00017     314
>DP00017     315
>DP00017     316
>DP00018     22
>DP00018     23
>DP00018     24
>DP00018     25
>DP00018     26
>DP00018     27
>DP00018     28
>DP00018     29
>DP00018     30
>DP00018     31
>DP00018     32
>DP00018     33
>DP00018     34
>DP00018     35
>DP00018     36
>DP00018     37
>DP00018     38
>DP00018     39
>DP00018     40
>DP00018     41
>DP00018     42
>DP00018     43
>DP00018     44
>DP00018     45
>DP00018     46
>DP00018     47
>DP00018     48
>DP00018     49
>DP00018     50
>DP00018     51
>DP00018     52
>DP00018     53
>DP00018     54
>DP00018     55
>DP00018     56
>DP00018     57
>DP00018     58
>DP00018     59
>DP00018     60
>DP00018     61
>DP00018     62
>DP00018     63
>DP00018     64
>DP00018     65
>DP00018     66
>DP00018     67
>DP00018     68
>DP00018     69
>DP00018     70
>DP00018     71
>DP00018     72
>DP00018     73
>DP00018     74
>DP00018     75
>DP00018     76
>DP00018     77
>DP00018     78
>DP00018     79
>DP00018     80
>DP00018     81
>DP00018     82
>DP00018     83
>DP00018     84
>DP00018     85
>DP00018     86
>DP00018     87
>DP00018     88
>DP00018     89
>DP00018     90
>DP00018     91
>DP00018     92
>DP00018     93
>DP00018     94
>DP00018     95
>DP00018     96
>DP00018     97
>DP00018     98
>DP00018     99
>DP00018     100
>DP00018     101
>DP00018     102
>DP00018     103
>DP00018     104
>DP00018     105
>DP00018     106
>DP00019     1
>DP00019     2
>DP00019     3
>DP00019     4
>DP00019     5
>DP00019     6
>DP00019     7
>DP00019     8
>DP00019     9
>DP00019     10
>DP00019     11
>DP00019     12
>DP00019     13
>DP00019     14
>DP00019     15
>DP00019     16
>DP00019     17
>DP00019     18
>DP00019     19
>DP00019     20
>DP00019     21
>DP00019     22
>DP00019     23
>DP00019     24
>DP00019     25
>DP00019     26
>DP00019     27
>DP00019     28
>DP00019     29
>DP00019     30
>DP00019     31
>DP00019     32
>DP00019     33
>DP00019     34
>DP00019     35
>DP00019     36
>DP00019     37
>DP00019     38
>DP00019     39
>DP00019     40
>DP00019     41
>DP00019     42
>DP00019     43
>DP00019     44
>DP00019     45
>DP00020     482
>DP00020     483
>DP00020     484
>DP00020     485
>DP00020     486
>DP00020     487
>DP00020     488
>DP00020     489
>DP00020     490
>DP00020     491
>DP00020     492
>DP00020     493
>DP00020     494
>DP00020     495
>DP00020     496
>DP00020     497
>DP00020     498
>DP00020     499
>DP00020     500
>DP00020     501
>DP00020     502
>DP00020     503
>DP00020     504
>DP00020     505
>DP00020     506
>DP00020     507
>DP00020     508
>DP00020     509
>DP00020     510
>DP00020     511
>DP00020     512
>DP00021     40
>DP00021     41
>DP00021     42
>DP00021     43
>DP00021     44
>DP00021     45
>DP00021     46
>DP00021     47
>DP00021     48
>DP00021     49
>DP00021     50
>DP00021     51
>DP00021     52
>DP00021     53
>DP00021     54
>DP00021     55
>DP00021     56
>DP00021     57
>DP00021     58
>DP00021     59
>DP00021     60
>DP00021     61
>DP00021     62
>DP00021     63
>DP00021     64
>DP00021     65
>DP00021     66
>DP00021     67
>DP00021     400
>DP00021     401
>DP00021     402
>DP00021     403
>DP00021     404
>DP00021     405
>DP00021     406
>DP00021     407
>DP00021     408
>DP00021     409
>DP00021     410
>DP00021     411
>DP00021     412
>DP00021     413
>DP00021     414
>DP00021     415
>DP00021     416
>DP00021     417
>DP00021     418
>DP00021     419
>DP00021     420
>DP00021     421
>DP00021     422
>DP00021     423
>DP00021     424
>DP00021     425
>DP00021     426
>DP00021     427
>DP00021     428
>DP00021     429
>DP00021     430
>DP00021     431
>DP00021     432
>DP00021     433
>DP00021     434
>DP00021     435
>DP00021     436
>DP00021     437
>DP00021     438
>DP00021     439
>DP00021     440
>DP00021     441
>DP00021     442
>DP00021     443
>DP00021     444
>DP00021     445
>DP00021     446
>DP00021     447
>DP00021     448
>DP00021     449
>DP00021     450
>DP00021     451
>DP00021     452
>DP00021     453
>DP00021     454
>DP00021     455
>DP00021     456
>DP00021     457
>DP00021     458
>DP00021     459
>DP00021     460
>DP00021     461
>DP00021     462
>DP00021     463
>DP00021     464
>DP00021     465
>DP00021     466
>DP00021     467
>DP00021     468
>DP00021     469
>DP00021     470
>DP00021     471
>DP00021     472
>DP00021     473
>DP00021     474
>DP00021     475
>DP00023     190
>DP00023     191
>DP00023     192
>DP00023     193
>DP00023     194
>DP00023     195
>DP00023     196
>DP00023     197
>DP00023     198
>DP00023     199
>DP00023     200
>DP00023     201
>DP00023     202
>DP00023     203
>DP00023     204
>DP00023     205
>DP00023     206
>DP00023     207
>DP00023     285
>DP00023     286
>DP00023     287
>DP00023     288
>DP00023     289
>DP00023     290
>DP00023     291
>DP00023     292
>DP00023     293
>DP00023     294
>DP00023     295
>DP00023     296
>DP00023     297
>DP00023     298
>DP00023     299
>DP00023     300
>DP00023     301
>DP00023     302
>DP00023     303
>DP00023     304
>DP00023     305
>DP00023     306
>DP00023     307
>DP00023     308
>DP00023     309
>DP00023     310
>DP00023     311
>DP00023     312
>DP00023     313
>DP00023     314
>DP00023     315
>DP00023     316
>DP00023     317
>DP00023     318
>DP00023     319
>DP00023     320
>DP00023     321
>DP00023     322
>DP00023     323
>DP00023     324
>DP00023     325
>DP00023     326
>DP00023     327
>DP00025     745
>DP00025     746
>DP00025     747
>DP00025     748
>DP00025     749
>DP00025     750
>DP00025     751
>DP00025     752
>DP00025     753
>DP00025     754
>DP00025     755
>DP00025     756
>DP00025     757
>DP00025     758
>DP00025     759
>DP00025     760
>DP00025     761
>DP00025     762
>DP00025     763
>DP00025     764
>DP00025     765
>DP00025     766
>DP00025     767
>DP00025     768
>DP00025     769
>DP00025     770
>DP00025     771
>DP00025     772
>DP00025     773
>DP00025     774
>DP00025     775
>DP00025     776
>DP00025     777
>DP00025     778
>DP00025     779
>DP00025     780
>DP00025     781
>DP00025     782
>DP00025     783
>DP00025     784
>DP00025     785
>DP00025     786
>DP00025     787
>DP00025     788
>DP00025     789
>DP00025     790
>DP00025     791
>DP00025     792
>DP00025     793
>DP00025     794
>DP00025     795
>DP00025     796
>DP00025     797
>DP00025     798
>DP00025     799
>DP00025     800
>DP00025     801
>DP00025     802
>DP00025     803
>DP00025     804
>DP00025     805
>DP00025     806
>DP00025     807
>DP00025     808
>DP00025     809
>DP00025     810
>DP00025     811
>DP00025     812
>DP00025     813
>DP00025     814
>DP00025     815
>DP00025     816
>DP00025     817
>DP00025     818
>DP00025     819
>DP00025     820
>DP00025     821
>DP00025     822
>DP00025     823
>DP00025     824
>DP00025     825
>DP00025     826
>DP00025     827
>DP00025     828
>DP00025     829
>DP00025     830
>DP00025     831
>DP00025     832
>DP00025     833
>DP00025     834
>DP00025     835
>DP00025     836
>DP00025     837
>DP00025     838
>DP00025     839
>DP00025     840
>DP00025     841
>DP00025     842
>DP00025     843
>DP00025     844
>DP00025     845
>DP00025     846
>DP00025     847
>DP00025     848
>DP00025     849
>DP00025     850
>DP00025     851
>DP00025     852
>DP00025     853
>DP00025     854
>DP00025     855
>DP00025     856
>DP00025     857
>DP00025     858
>DP00025     859
>DP00025     860
>DP00025     861
>DP00025     862
>DP00025     863
>DP00025     864
>DP00025     865
>DP00025     866
>DP00025     867
>DP00025     868
>DP00025     869
>DP00025     870
>DP00025     871
>DP00025     872
>DP00025     873
>DP00026     1
>DP00026     2
>DP00026     3
>DP00026     4
>DP00026     5
>DP00026     6
>DP00026     7
>DP00026     8
>DP00026     9
>DP00026     10
>DP00026     11
>DP00026     12
>DP00026     13
>DP00026     14
>DP00026     15
>DP00026     16
>DP00026     17
>DP00026     18
>DP00026     19
>DP00026     20
>DP00026     21
>DP00026     22
>DP00026     23
>DP00026     24
>DP00026     25
>DP00026     26
>DP00026     27
>DP00026     28
>DP00026     29
>DP00026     30
>DP00026     31
>DP00026     32
>DP00026     33
>DP00026     34
>DP00026     35
>DP00026     36
>DP00026     37
>DP00026     38
>DP00026     39
>DP00026     40
>DP00026     41
>DP00026     42
>DP00026     43
>DP00026     44
>DP00026     45
>DP00026     46
>DP00026     47
>DP00026     48
>DP00026     49
>DP00026     50
>DP00026     51
>DP00026     52
>DP00026     53
>DP00026     54
>DP00026     55
>DP00026     451
>DP00026     452
>DP00026     453
>DP00026     454
>DP00026     455
>DP00026     456
>DP00026     457
>DP00026     458
>DP00026     459
>DP00026     460
>DP00026     461
>DP00026     462
>DP00026     463
>DP00026     464
>DP00026     465
>DP00026     466
>DP00026     467
>DP00026     468
>DP00026     469
>DP00026     470
>DP00026     471
>DP00026     472
>DP00026     473
>DP00026     474
>DP00026     475
>DP00026     476
>DP00026     477
>DP00026     478
>DP00026     479
>DP00026     480
>DP00026     481
>DP00026     482
>DP00026     483
>DP00026     484
>DP00026     485
>DP00026     486
>DP00026     487
>DP00026     488
>DP00026     489
>DP00026     490
>DP00026     491
>DP00026     492
>DP00026     493
>DP00026     494
>DP00027     1
>DP00027     2
>DP00027     3
>DP00027     4
>DP00027     5
>DP00027     6
>DP00027     7
>DP00027     8
>DP00027     9
>DP00027     10
>DP00027     11
>DP00027     12
>DP00027     13
>DP00027     14
>DP00027     15
>DP00027     16
>DP00027     17
>DP00027     18
>DP00027     19
>DP00027     20
>DP00027     21
>DP00027     22
>DP00027     23
>DP00027     24
>DP00027     25
>DP00027     26
>DP00027     27
>DP00027     28
>DP00027     29
>DP00027     30
>DP00027     31
>DP00027     32
>DP00027     33
>DP00027     34
>DP00027     35
>DP00027     36
>DP00027     37
>DP00027     38
>DP00027     39
>DP00027     40
>DP00027     41
>DP00027     42
>DP00027     43
>DP00027     44
>DP00027     45
>DP00027     46
>DP00027     47
>DP00027     48
>DP00027     49
>DP00027     50
>DP00027     51
>DP00027     52
>DP00027     53
>DP00027     54
>DP00027     55
>DP00027     56
>DP00027     57
>DP00027     58
>DP00027     59
>DP00027     60
>DP00027     61
>DP00027     62
>DP00027     63
>DP00027     64
>DP00027     65
>DP00027     66
>DP00027     67
>DP00027     68
>DP00027     69
>DP00027     70
>DP00027     71
>DP00027     72
>DP00027     73
>DP00027     74
>DP00027     75
>DP00027     76
>DP00027     77
>DP00027     78
>DP00027     79
>DP00027     80
>DP00027     81
>DP00027     82
>DP00027     83
>DP00027     84
>DP00027     85
>DP00027     86
>DP00027     87
>DP00027     88
>DP00027     89
>DP00027     90
>DP00027     91
>DP00027     92
>DP00027     93
>DP00027     94
>DP00027     95
>DP00027     96
>DP00027     97
>DP00029     77
>DP00029     78
>DP00029     79
>DP00029     80
>DP00029     81
>DP00029     82
>DP00029     83
>DP00029     84
>DP00029     85
>DP00029     86
>DP00029     87
>DP00029     88
>DP00029     89
>DP00029     90
>DP00029     91
>DP00029     92
>DP00029     93
>DP00029     94
>DP00029     95
>DP00029     96
>DP00029     97
>DP00029     98
>DP00029     99
>DP00029     100
>DP00029     101
>DP00029     102
>DP00029     103
>DP00029     104
>DP00029     105
>DP00029     106
>DP00029     107
>DP00029     108
>DP00029     109
>DP00029     110
>DP00029     111
>DP00029     112
>DP00029     113
>DP00029     170
>DP00029     171
>DP00029     172
>DP00029     173
>DP00030     1
>DP00030     2
>DP00030     3
>DP00030     4
>DP00030     5
>DP00030     6
>DP00030     7
>DP00030     8
>DP00030     9
>DP00030     10
>DP00030     11
>DP00030     12
>DP00030     13
>DP00030     14
>DP00030     15
>DP00030     16
>DP00030     17
>DP00030     18
>DP00030     19
>DP00030     20
>DP00030     21
>DP00030     22
>DP00030     23
>DP00030     24
>DP00030     25
>DP00030     26
>DP00030     27
>DP00030     28
>DP00030     29
>DP00030     30
>DP00030     31
>DP00030     32
>DP00030     33
>DP00030     34
>DP00030     35
>DP00030     36
>DP00030     37
>DP00030     38
>DP00030     39
>DP00030     40
>DP00030     41
>DP00030     42
>DP00030     43
>DP00030     44
>DP00030     45
>DP00030     46
>DP00030     47
>DP00030     48
>DP00030     49
>DP00030     50
>DP00030     51
>DP00030     52
>DP00030     53
>DP00030     54
>DP00030     55
>DP00030     56
>DP00030     57
>DP00030     58
>DP00030     59
>DP00030     60
>DP00030     61
>DP00030     62
>DP00030     63
>DP00030     64
>DP00030     65
>DP00030     66
>DP00030     67
>DP00030     68
>DP00030     69
>DP00030     70
>DP00030     71
>DP00030     72
>DP00030     73
>DP00030     74
>DP00030     75
>DP00030     76
>DP00030     77
>DP00030     78
>DP00030     79
>DP00030     80
>DP00030     81
>DP00030     82
>DP00030     83
>DP00030     84
>DP00030     85
>DP00030     86
>DP00030     87
>DP00030     88
>DP00030     89
>DP00030     90
>DP00030     91
>DP00030     92
>DP00030     93
>DP00030     94
>DP00030     95
>DP00030     96
>DP00030     97
>DP00030     98
>DP00030     99
>DP00030     100
>DP00030     101
>DP00030     102
>DP00030     103
>DP00030     104
>DP00030     105
>DP00030     106
>DP00030     107
>DP00030     108
>DP00030     109
>DP00030     110
>DP00030     111
>DP00030     112
>DP00030     113
>DP00030     114
>DP00030     115
>DP00030     116
>DP00030     117
>DP00030     118
>DP00030     119
>DP00030     120
>DP00030     121
>DP00030     122
>DP00030     123
>DP00030     124
>DP00030     125
>DP00030     126
>DP00030     127
>DP00030     128
>DP00030     129
>DP00030     130
>DP00030     131
>DP00030     132
>DP00030     133
>DP00030     134
>DP00030     135
>DP00030     136
>DP00030     137
>DP00030     138
>DP00030     139
>DP00030     140
>DP00030     141
>DP00030     142
>DP00030     143
>DP00030     144
>DP00030     145
>DP00030     146
>DP00030     147
>DP00030     148
>DP00030     149
>DP00030     150
>DP00030     151
>DP00030     152
>DP00030     153
>DP00030     154
>DP00030     155
>DP00030     156
>DP00030     157
>DP00030     158
>DP00030     159
>DP00030     160
>DP00030     161
>DP00030     162
>DP00030     163
>DP00030     164
>DP00030     165
>DP00030     166
>DP00030     167
>DP00030     168
>DP00030     169
>DP00030     170
>DP00030     171
>DP00030     172
>DP00030     173
>DP00030     174
>DP00030     175
>DP00030     176
>DP00030     177
>DP00030     178
>DP00030     179
>DP00030     180
>DP00030     181
>DP00030     182
>DP00030     183
>DP00030     184
>DP00030     185
>DP00030     186
>DP00030     187
>DP00030     188
>DP00030     189
>DP00030     190
>DP00030     191
>DP00030     192
>DP00030     193
>DP00030     194
>DP00030     195
>DP00030     196
>DP00030     197
>DP00030     198
>DP00030     199
>DP00030     200
>DP00030     201
>DP00030     202
>DP00030     203
>DP00030     204
>DP00030     205
>DP00030     206
>DP00030     207
>DP00030     208
>DP00030     209
>DP00030     210
>DP00030     211
>DP00030     212
>DP00030     213
>DP00030     214
>DP00030     215
>DP00030     216
>DP00030     217
>DP00030     218
>DP00030     219
>DP00030     220
>DP00030     221
>DP00030     222
>DP00030     223
>DP00030     224
>DP00030     225
>DP00030     226
>DP00030     227
>DP00030     228
>DP00030     229
>DP00030     230
>DP00030     231
>DP00030     232
>DP00030     233
>DP00030     234
>DP00030     235
>DP00030     236
>DP00030     237
>DP00030     238
>DP00030     239
>DP00030     240
>DP00030     241
>DP00030     242
>DP00030     243
>DP00030     244
>DP00030     245
>DP00030     246
>DP00030     247
>DP00030     248
>DP00030     249
>DP00030     250
>DP00030     251
>DP00030     252
>DP00030     253
>DP00030     254
>DP00030     255
>DP00030     256
>DP00030     257
>DP00030     258
>DP00030     259
>DP00030     260
>DP00030     261
>DP00030     262
>DP00030     263
>DP00030     264
>DP00030     265
>DP00030     266
>DP00030     267
>DP00030     268
>DP00030     269
>DP00030     270
>DP00030     271
>DP00030     272
>DP00030     273
>DP00030     274
>DP00030     275
>DP00030     276
>DP00030     277
>DP00030     278
>DP00030     279
>DP00030     280
>DP00030     281
>DP00030     282
>DP00030     283
>DP00030     284
>DP00030     285
>DP00030     286
>DP00030     287
>DP00030     288
>DP00030     289
>DP00030     290
>DP00030     291
>DP00030     292
>DP00030     293
>DP00030     294
>DP00030     295
>DP00030     296
>DP00030     297
>DP00030     298
>DP00030     299
>DP00030     300
>DP00030     301
>DP00030     302
>DP00030     303
>DP00030     304
>DP00030     305
>DP00030     306
>DP00030     307
>DP00030     308
>DP00030     309
>DP00030     310
>DP00030     311
>DP00030     312
>DP00030     313
>DP00030     314
>DP00030     315
>DP00030     316
>DP00030     317
>DP00030     318
>DP00030     319
>DP00030     320
>DP00030     321
>DP00030     322
>DP00030     323
>DP00030     324
>DP00030     325
>DP00030     326
>DP00030     327
>DP00030     328
>DP00030     329
>DP00030     330
>DP00030     331
>DP00030     332
>DP00030     333
>DP00030     334
>DP00030     335
>DP00030     336
>DP00030     337
>DP00030     338
>DP00030     339
>DP00030     340
>DP00030     341
>DP00030     342
>DP00030     343
>DP00030     344
>DP00030     345
>DP00030     346
>DP00030     347
>DP00030     348
>DP00030     349
>DP00030     350
>DP00030     351
>DP00030     352
>DP00030     353
>DP00030     354
>DP00030     355
>DP00030     356
>DP00030     357
>DP00030     358
>DP00030     359
>DP00030     360
>DP00030     361
>DP00030     362
>DP00030     363
>DP00030     364
>DP00030     365
>DP00030     366
>DP00030     367
>DP00030     368
>DP00030     369
>DP00030     370
>DP00030     371
>DP00030     372
>DP00030     373
>DP00030     374
>DP00030     375
>DP00030     376
>DP00030     377
>DP00030     378
>DP00030     379
>DP00030     380
>DP00030     381
>DP00030     382
>DP00030     383
>DP00030     384
>DP00030     385
>DP00030     386
>DP00030     387
>DP00030     388
>DP00030     389
>DP00030     390
>DP00030     391
>DP00030     392
>DP00030     393
>DP00030     394
>DP00030     395
>DP00030     396
>DP00030     397
>DP00030     398
>DP00030     399
>DP00030     400
>DP00030     401
>DP00030     402
>DP00030     403
>DP00030     404
>DP00030     405
>DP00030     406
>DP00030     407
>DP00030     408
>DP00030     409
>DP00030     410
>DP00030     411
>DP00030     412
>DP00030     413
>DP00030     414
>DP00030     415
>DP00030     416
>DP00030     417
>DP00030     418
>DP00030     419
>DP00030     420
>DP00030     421
>DP00030     422
>DP00030     423
>DP00030     424
>DP00030     425
>DP00030     426
>DP00030     427
>DP00030     428
>DP00030     429
>DP00030     430
>DP00030     431
>DP00030     432
>DP00030     433
>DP00030     434
>DP00030     435
>DP00030     436
>DP00030     437
>DP00030     438
>DP00030     439
>DP00030     440
>DP00030     441
>DP00030     442
>DP00030     443
>DP00030     444
>DP00030     445
>DP00030     446
>DP00030     447
>DP00030     448
>DP00030     449
>DP00030     450
>DP00030     451
>DP00030     452
>DP00030     453
>DP00030     454
>DP00030     455
>DP00030     456
>DP00030     457
>DP00030     458
>DP00030     459
>DP00030     460
>DP00030     461
>DP00030     462
>DP00030     463
>DP00030     464
>DP00030     465
>DP00030     466
>DP00030     467
>DP00030     468
>DP00030     469
>DP00030     470
>DP00030     471
>DP00030     472
>DP00030     473
>DP00030     474
>DP00030     475
>DP00030     476
>DP00030     477
>DP00030     478
>DP00030     479
>DP00030     480
>DP00030     481
>DP00030     482
>DP00030     483
>DP00030     484
>DP00030     485
>DP00030     486
>DP00030     487
>DP00030     488
>DP00030     489
>DP00030     490
>DP00030     491
>DP00030     492
>DP00030     493
>DP00030     494
>DP00030     495
>DP00030     496
>DP00030     497
>DP00030     498
>DP00030     499
>DP00030     500
>DP00031     1
>DP00031     2
>DP00031     3
>DP00031     4
>DP00031     5
>DP00031     6
>DP00031     7
>DP00031     8
>DP00031     9
>DP00031     10
>DP00031     11
>DP00031     12
>DP00031     13
>DP00031     14
>DP00031     15
>DP00031     16
>DP00031     17
>DP00031     18
>DP00031     19
>DP00031     20
>DP00031     21
>DP00031     22
>DP00031     23
>DP00031     24
>DP00031     25
>DP00031     26
>DP00031     27
>DP00031     28
>DP00031     29
>DP00031     30
>DP00031     31
>DP00031     32
>DP00031     33
>DP00031     34
>DP00031     35
>DP00031     36
>DP00031     37
>DP00031     38
>DP00031     39
>DP00031     40
>DP00033     1
>DP00033     2
>DP00033     3
>DP00033     4
>DP00033     5
>DP00033     6
>DP00033     7
>DP00033     8
>DP00033     9
>DP00033     10
>DP00033     11
>DP00033     12
>DP00033     13
>DP00033     14
>DP00033     15
>DP00033     16
>DP00033     17
>DP00033     18
>DP00033     19
>DP00033     20
>DP00033     21
>DP00033     22
>DP00033     23
>DP00033     24
>DP00033     25
>DP00033     26
>DP00033     27
>DP00033     28
>DP00033     29
>DP00033     30
>DP00033     31
>DP00033     32
>DP00033     50
>DP00033     51
>DP00033     52
>DP00033     53
>DP00033     54
>DP00033     55
>DP00033     56
>DP00033     57
>DP00033     58
>DP00033     59
>DP00033     60
>DP00033     61
>DP00033     62
>DP00033     72
>DP00033     73
>DP00033     74
>DP00033     75
>DP00033     76
>DP00033     77
>DP00033     78
>DP00033     144
>DP00033     145
>DP00033     146
>DP00033     147
>DP00033     148
>DP00033     222
>DP00033     223
>DP00033     224
>DP00033     225
>DP00033     226
>DP00033     234
>DP00033     235
>DP00033     236
>DP00033     237
>DP00033     238
>DP00034     236
>DP00034     237
>DP00034     238
>DP00034     239
>DP00034     240
>DP00034     241
>DP00034     242
>DP00034     243
>DP00034     244
>DP00034     245
>DP00034     246
>DP00034     247
>DP00034     248
>DP00034     249
>DP00034     250
>DP00034     251
>DP00034     252
>DP00034     253
>DP00034     254
>DP00034     255
>DP00034     256
>DP00034     257
>DP00034     258
>DP00034     259
>DP00034     260
>DP00034     261
>DP00034     262
>DP00034     263
>DP00034     264
>DP00034     265
>DP00034     266
>DP00034     267
>DP00034     268
>DP00034     269
>DP00034     270
>DP00034     271
>DP00034     272
>DP00034     273
>DP00034     274
>DP00035     1
>DP00035     2
>DP00035     3
>DP00035     4
>DP00035     5
>DP00035     6
>DP00035     7
>DP00035     8
>DP00035     9
>DP00035     10
>DP00035     11
>DP00035     12
>DP00035     13
>DP00035     14
>DP00035     15
>DP00035     16
>DP00035     17
>DP00035     18
>DP00035     19
>DP00035     20
>DP00035     21
>DP00035     22
>DP00035     23
>DP00035     24
>DP00035     25
>DP00035     26
>DP00035     27
>DP00035     28
>DP00035     29
>DP00035     30
>DP00035     31
>DP00037     2
>DP00037     3
>DP00037     4
>DP00037     5
>DP00037     6
>DP00037     7
>DP00037     8
>DP00037     104
>DP00037     105
>DP00037     106
>DP00037     107
>DP00037     113
>DP00037     114
>DP00037     115
>DP00037     116
>DP00037     117
>DP00037     118
>DP00037     119
>DP00037     120
>DP00037     121
>DP00037     122
>DP00037     123
>DP00037     124
>DP00037     125
>DP00037     197
>DP00037     198
>DP00037     199
>DP00037     200
>DP00037     201
>DP00037     202
>DP00037     203
>DP00037     204
>DP00037     205
>DP00037     206
>DP00037     235
>DP00037     236
>DP00037     237
>DP00037     238
>DP00037     239
>DP00037     240
>DP00037     241
>DP00037     242
>DP00037     243
>DP00040     1
>DP00040     2
>DP00040     3
>DP00040     4
>DP00040     5
>DP00040     6
>DP00040     7
>DP00040     8
>DP00040     9
>DP00040     10
>DP00040     11
>DP00040     12
>DP00040     13
>DP00040     14
>DP00040     15
>DP00040     16
>DP00040     17
>DP00040     18
>DP00040     19
>DP00040     20
>DP00040     21
>DP00040     22
>DP00040     23
>DP00040     24
>DP00040     25
>DP00040     26
>DP00040     27
>DP00040     28
>DP00040     29
>DP00040     30
>DP00040     31
>DP00040     32
>DP00040     33
>DP00040     34
>DP00040     35
>DP00040     36
>DP00040     37
>DP00040     38
>DP00040     39
>DP00040     40
>DP00040     41
>DP00040     42
>DP00040     43
>DP00040     44
>DP00040     45
>DP00040     46
>DP00040     47
>DP00040     48
>DP00040     49
>DP00040     50
>DP00040     51
>DP00040     52
>DP00040     53
>DP00040     54
>DP00040     55
>DP00040     56
>DP00040     57
>DP00040     58
>DP00040     59
>DP00040     60
>DP00040     61
>DP00040     62
>DP00040     63
>DP00040     64
>DP00040     65
>DP00040     66
>DP00040     67
>DP00040     68
>DP00040     69
>DP00040     70
>DP00040     71
>DP00040     72
>DP00040     73
>DP00040     74
>DP00040     75
>DP00040     76
>DP00040     77
>DP00040     78
>DP00040     79
>DP00040     80
>DP00040     81
>DP00040     82
>DP00040     83
>DP00040     84
>DP00040     85
>DP00040     86
>DP00040     87
>DP00040     88
>DP00040     89
>DP00040     90
>DP00040     91
>DP00040     92
>DP00040     93
>DP00040     94
>DP00040     95
>DP00040     96
>DP00040     97
>DP00040     98
>DP00040     99
>DP00040     100
>DP00040     101
>DP00040     102
>DP00040     103
>DP00040     104
>DP00040     105
>DP00040     106
>DP00040     107
>DP00041     1
>DP00041     2
>DP00041     3
>DP00041     4
>DP00041     5
>DP00041     6
>DP00041     7
>DP00041     8
>DP00041     9
>DP00041     10
>DP00041     11
>DP00041     12
>DP00041     13
>DP00041     14
>DP00041     15
>DP00041     16
>DP00041     17
>DP00041     18
>DP00041     19
>DP00041     20
>DP00041     21
>DP00041     22
>DP00041     23
>DP00041     24
>DP00041     25
>DP00041     26
>DP00041     27
>DP00041     28
>DP00041     29
>DP00041     30
>DP00041     31
>DP00041     32
>DP00041     33
>DP00041     34
>DP00041     35
>DP00041     36
>DP00041     37
>DP00041     38
>DP00041     39
>DP00041     40
>DP00041     41
>DP00041     42
>DP00041     43
>DP00041     44
>DP00041     45
>DP00041     46
>DP00041     47
>DP00041     48
>DP00041     49
>DP00041     50
>DP00041     51
>DP00041     52
>DP00041     53
>DP00041     54
>DP00041     55
>DP00041     56
>DP00041     57
>DP00041     58
>DP00041     59
>DP00041     60
>DP00041     61
>DP00041     62
>DP00041     63
>DP00041     64
>DP00041     65
>DP00041     66
>DP00041     67
>DP00041     68
>DP00041     69
>DP00041     70
>DP00041     71
>DP00041     72
>DP00041     73
>DP00041     74
>DP00041     75
>DP00041     76
>DP00041     77
>DP00041     78
>DP00041     79
>DP00041     80
>DP00041     81
>DP00041     82
>DP00041     83
>DP00041     84
>DP00041     85
>DP00041     86
>DP00041     87
>DP00041     88
>DP00041     89
>DP00041     90
>DP00041     91
>DP00041     92
>DP00041     93
>DP00041     94
>DP00041     95
>DP00041     96
>DP00041     97
>DP00041     98
>DP00041     99
>DP00041     100
>DP00041     101
>DP00041     102
>DP00041     103
>DP00041     104
>DP00041     105
>DP00041     106
>DP00041     107
>DP00041     108
>DP00041     109
>DP00041     110
>DP00041     111
>DP00041     112
>DP00041     113
>DP00041     114
>DP00041     115
>DP00041     116
>DP00041     117
>DP00041     118
>DP00041     119
>DP00041     120
>DP00041     121
>DP00041     122
>DP00041     123
>DP00041     124
>DP00041     125
>DP00041     126
>DP00041     127
>DP00041     128
>DP00041     129
>DP00041     130
>DP00041     131
>DP00041     132
>DP00041     133
>DP00041     134
>DP00041     135
>DP00041     136
>DP00041     137
>DP00041     138
>DP00041     139
>DP00041     140
>DP00041     141
>DP00041     142
>DP00041     143
>DP00041     144
>DP00041     145
>DP00041     146
>DP00041     147
>DP00041     148
>DP00041     149
>DP00041     150
>DP00041     151
>DP00041     152
>DP00041     153
>DP00041     154
>DP00041     155
>DP00041     156
>DP00041     157
>DP00041     158
>DP00041     159
>DP00041     160
>DP00041     161
>DP00041     162
>DP00041     163
>DP00041     164
>DP00041     165
>DP00041     166
>DP00041     167
>DP00041     168
>DP00041     169
>DP00041     170
>DP00041     171
>DP00041     172
>DP00041     173
>DP00041     174
>DP00041     175
>DP00041     176
>DP00041     177
>DP00041     178
>DP00041     179
>DP00041     180
>DP00041     181
>DP00041     182
>DP00041     183
>DP00041     184
>DP00041     185
>DP00041     186
>DP00041     187
>DP00041     188
>DP00041     189
>DP00041     190
>DP00041     191
>DP00041     192
>DP00041     193
>DP00041     194
>DP00041     195
>DP00041     196
>DP00041     197
>DP00041     198
>DP00041     199
>DP00041     200
>DP00041     201
>DP00041     202
>DP00041     203
>DP00041     204
>DP00044     1
>DP00044     2
>DP00044     3
>DP00044     4
>DP00044     5
>DP00044     6
>DP00044     7
>DP00044     8
>DP00044     9
>DP00044     10
>DP00044     11
>DP00044     12
>DP00044     13
>DP00044     14
>DP00044     15
>DP00044     16
>DP00044     17
>DP00044     18
>DP00044     19
>DP00044     20
>DP00044     21
>DP00044     101
>DP00044     102
>DP00044     103
>DP00044     104
>DP00044     105
>DP00044     106
>DP00044     107
>DP00044     108
>DP00044     109
>DP00044     110
>DP00044     111
>DP00044     112
>DP00044     113
>DP00044     114
>DP00044     115
>DP00044     116
>DP00044     117
>DP00044     118
>DP00044     119
>DP00044     120
>DP00044     121
>DP00044     122
>DP00044     123
>DP00044     124
>DP00044     125
>DP00044     126
>DP00044     127
>DP00044     128
>DP00044     129
>DP00044     130
>DP00044     131
>DP00044     132
>DP00044     133
>DP00044     134
>DP00044     135
>DP00044     136
>DP00044     137
>DP00044     138
>DP00044     139
>DP00044     140
>DP00044     141
>DP00044     142
>DP00044     143
>DP00044     144
>DP00044     145
>DP00044     146
>DP00044     147
>DP00044     148
>DP00044     149
>DP00044     150
>DP00044     151
>DP00044     152
>DP00044     153
>DP00044     154
>DP00044     155
>DP00044     156
>DP00044     157
>DP00044     158
>DP00044     159
>DP00044     160
>DP00044     161
>DP00044     162
>DP00044     163
>DP00044     164
>DP00044     165
>DP00044     166
>DP00044     167
>DP00044     168
>DP00044     169
>DP00044     170
>DP00044     171
>DP00044     172
>DP00044     173
>DP00044     174
>DP00044     175
>DP00044     176
>DP00044     177
>DP00044     178
>DP00044     179
>DP00044     180
>DP00044     181
>DP00044     182
>DP00044     183
>DP00044     184
>DP00044     185
>DP00046     296
>DP00046     297
>DP00046     298
>DP00046     299
>DP00046     300
>DP00046     301
>DP00046     302
>DP00046     303
>DP00046     304
>DP00046     305
>DP00046     306
>DP00046     307
>DP00046     308
>DP00046     309
>DP00046     310
>DP00046     311
>DP00046     312
>DP00046     313
>DP00046     314
>DP00046     315
>DP00046     316
>DP00046     317
>DP00046     318
>DP00046     319
>DP00046     320
>DP00046     321
>DP00046     322
>DP00046     323
>DP00046     324
>DP00046     325
>DP00046     326
>DP00046     327
>DP00046     328
>DP00046     329
>DP00046     330
>DP00046     331
>DP00046     332
>DP00046     333
>DP00046     334
>DP00046     335
>DP00046     336
>DP00046     337
>DP00046     338
>DP00046     339
>DP00046     340
>DP00046     341
>DP00046     342
>DP00046     343
>DP00046     344
>DP00046     345
>DP00046     346
>DP00046     347
>DP00046     348
>DP00046     349
>DP00046     350
>DP00046     351
>DP00046     352
>DP00046     353
>DP00046     354
>DP00046     355
>DP00046     356
>DP00046     357
>DP00046     358
>DP00046     359
>DP00046     360
>DP00046     361
>DP00046     362
>DP00046     363
>DP00046     364
>DP00046     365
>DP00046     366
>DP00046     367
>DP00046     368
>DP00046     369
>DP00046     370
>DP00046     371
>DP00046     372
>DP00046     373
>DP00046     374
>DP00046     375
>DP00046     376
>DP00046     377
>DP00046     378
>DP00046     379
>DP00046     380
>DP00046     381
>DP00046     382
>DP00046     383
>DP00046     384
>DP00046     385
>DP00046     386
>DP00046     387
>DP00046     388
>DP00046     389
>DP00046     390
>DP00046     391
>DP00046     392
>DP00046     393
>DP00046     394
>DP00046     395
>DP00046     396
>DP00046     397
>DP00048     1
>DP00048     2
>DP00048     3
>DP00048     4
>DP00048     5
>DP00048     6
>DP00048     7
>DP00048     8
>DP00048     9
>DP00048     10
>DP00048     11
>DP00048     12
>DP00048     13
>DP00048     14
>DP00048     15
>DP00048     16
>DP00048     17
>DP00048     18
>DP00048     19
>DP00048     20
>DP00048     21
>DP00048     22
>DP00048     23
>DP00048     24
>DP00048     25
>DP00048     26
>DP00048     27
>DP00048     28
>DP00048     29
>DP00048     30
>DP00048     31
>DP00048     32
>DP00048     33
>DP00048     34
>DP00048     35
>DP00048     36
>DP00048     37
>DP00048     38
>DP00048     39
>DP00048     40
>DP00048     41
>DP00048     42
>DP00048     43
>DP00048     44
>DP00048     45
>DP00048     46
>DP00048     47
>DP00048     48
>DP00048     49
>DP00048     50
>DP00048     51
>DP00048     52
>DP00048     53
>DP00048     54
>DP00048     55
>DP00048     56
>DP00048     57
>DP00048     58
>DP00048     59
>DP00048     60
>DP00048     61
>DP00048     62
>DP00048     63
>DP00048     64
>DP00048     65
>DP00048     66
>DP00048     67
>DP00048     68
>DP00048     69
>DP00048     70
>DP00048     71
>DP00048     72
>DP00048     73
>DP00048     148
>DP00048     149
>DP00048     150
>DP00048     151
>DP00048     152
>DP00048     153
>DP00048     154
>DP00048     155
>DP00048     156
>DP00048     157
>DP00048     158
>DP00048     159
>DP00048     160
>DP00048     161
>DP00048     162
>DP00048     163
>DP00048     164
>DP00048     165
>DP00048     166
>DP00048     167
>DP00048     168
>DP00048     169
>DP00048     170
>DP00048     171
>DP00048     172
>DP00048     173
>DP00048     174
>DP00048     175
>DP00048     176
>DP00048     177
>DP00048     178
>DP00048     204
>DP00048     205
>DP00048     206
>DP00050     409
>DP00050     410
>DP00050     411
>DP00050     412
>DP00050     413
>DP00050     414
>DP00050     415
>DP00050     416
>DP00050     417
>DP00050     418
>DP00050     419
>DP00050     420
>DP00050     421
>DP00050     422
>DP00050     423
>DP00050     424
>DP00050     425
>DP00050     426
>DP00050     427
>DP00050     428
>DP00050     429
>DP00050     430
>DP00050     431
>DP00050     432
>DP00050     433
>DP00050     434
>DP00050     435
>DP00050     436
>DP00050     437
>DP00050     438
>DP00050     439
>DP00050     440
>DP00050     441
>DP00050     442
>DP00050     443
>DP00050     444
>DP00050     445
>DP00050     446
>DP00050     447
>DP00050     448
>DP00050     449
>DP00050     450
>DP00050     451
>DP00050     452
>DP00050     453
>DP00050     454
>DP00050     455
>DP00050     456
>DP00050     457
>DP00050     458
>DP00050     459
>DP00050     460
>DP00050     461
>DP00050     462
>DP00050     463
>DP00050     464
>DP00050     465
>DP00050     466
>DP00050     467
>DP00050     468
>DP00050     469
>DP00050     470
>DP00050     471
>DP00050     472
>DP00050     473
>DP00050     474
>DP00050     475
>DP00050     476
>DP00050     477
>DP00050     478
>DP00050     479
>DP00050     480
>DP00050     481
>DP00050     482
>DP00050     483
>DP00050     484
>DP00050     485
>DP00050     486
>DP00050     487
>DP00050     488
>DP00050     489
>DP00050     490
>DP00050     491
>DP00050     492
>DP00050     493
>DP00050     494
>DP00050     495
>DP00050     496
>DP00050     497
>DP00050     498
>DP00050     499
>DP00050     500
>DP00050     501
>DP00050     502
>DP00050     503
>DP00050     504
>DP00050     505
>DP00050     506
>DP00050     507
>DP00050     508
>DP00050     509
>DP00050     510
>DP00050     511
>DP00050     512
>DP00050     513
>DP00050     514
>DP00050     515
>DP00050     516
>DP00050     517
>DP00050     518
>DP00050     519
>DP00050     520
>DP00050     521
>DP00050     522
>DP00050     523
>DP00050     524
>DP00050     525
>DP00050     526
>DP00050     527
>DP00050     528
>DP00050     529
>DP00050     530
>DP00050     531
>DP00050     532
>DP00050     533
>DP00050     534
>DP00050     535
>DP00050     536
>DP00050     537
>DP00050     538
>DP00050     539
>DP00050     540
>DP00050     541
>DP00050     542
>DP00050     543
>DP00050     544
>DP00050     545
>DP00050     546
>DP00050     547
>DP00050     548
>DP00050     549
>DP00050     550
>DP00050     551
>DP00050     552
>DP00050     553
>DP00050     554
>DP00050     555
>DP00050     556
>DP00050     557
>DP00050     558
>DP00050     559
>DP00050     560
>DP00050     561
>DP00050     562
>DP00050     563
>DP00050     564
>DP00050     565
>DP00050     566
>DP00050     567
>DP00050     568
>DP00050     569
>DP00050     570
>DP00050     571
>DP00050     572
>DP00050     573
>DP00050     574
>DP00050     575
>DP00050     576
>DP00050     577
>DP00050     578
>DP00050     579
>DP00050     580
>DP00050     581
>DP00050     582
>DP00050     583
>DP00050     584
>DP00050     585
>DP00050     586
>DP00050     587
>DP00050     588
>DP00050     589
>DP00050     590
>DP00050     591
>DP00050     592
>DP00050     593
>DP00050     594
>DP00050     595
>DP00050     596
>DP00050     597
>DP00050     598
>DP00050     599
>DP00050     600
>DP00050     601
>DP00050     602
>DP00050     603
>DP00050     604
>DP00050     605
>DP00050     606
>DP00050     607
>DP00050     608
>DP00050     609
>DP00050     610
>DP00050     611
>DP00050     612
>DP00050     613
>DP00050     614
>DP00050     615
>DP00050     616
>DP00050     617
>DP00050     618
>DP00050     619
>DP00050     620
>DP00050     621
>DP00050     622
>DP00050     623
>DP00050     624
>DP00050     625
>DP00050     626
>DP00050     627
>DP00050     628
>DP00050     629
>DP00050     630
>DP00050     631
>DP00050     632
>DP00050     633
>DP00050     634
>DP00050     635
>DP00050     636
>DP00050     637
>DP00050     638
>DP00050     639
>DP00050     640
>DP00050     641
>DP00050     642
>DP00050     643
>DP00050     644
>DP00050     645
>DP00050     646
>DP00050     647
>DP00050     648
>DP00050     649
>DP00050     650
>DP00050     651
>DP00050     652
>DP00050     653
>DP00050     654
>DP00050     655
>DP00050     656
>DP00050     657
>DP00050     658
>DP00050     659
>DP00050     660
>DP00050     661
>DP00050     662
>DP00050     663
>DP00050     664
>DP00050     665
>DP00050     666
>DP00050     667
>DP00050     668
>DP00050     669
>DP00050     670
>DP00050     671
>DP00050     672
>DP00050     673
>DP00050     674
>DP00050     675
>DP00050     676
>DP00050     677
>DP00050     678
>DP00050     679
>DP00050     680
>DP00050     681
>DP00050     682
>DP00050     683
>DP00050     684
>DP00050     685
>DP00050     686
>DP00050     687
>DP00050     688
>DP00050     689
>DP00050     690
>DP00050     691
>DP00050     692
>DP00050     693
>DP00050     694
>DP00050     695
>DP00050     696
>DP00050     697
>DP00050     698
>DP00050     699
>DP00050     700
>DP00050     701
>DP00050     702
>DP00050     703
>DP00050     704
>DP00050     705
>DP00050     706
>DP00050     707
>DP00050     708
>DP00050     709
>DP00050     710
>DP00050     711
>DP00050     712
>DP00050     713
>DP00050     714
>DP00050     715
>DP00050     716
>DP00050     717
>DP00050     718
>DP00050     719
>DP00050     720
>DP00050     721
>DP00050     722
>DP00050     723
>DP00050     724
>DP00050     725
>DP00050     726
>DP00050     727
>DP00050     728
>DP00050     729
>DP00050     730
>DP00050     731
>DP00050     732
>DP00050     733
>DP00050     734
>DP00050     735
>DP00050     736
>DP00050     737
>DP00050     738
>DP00050     739
>DP00050     740
>DP00050     741
>DP00050     742
>DP00050     743
>DP00050     744
>DP00050     745
>DP00050     746
>DP00050     747
>DP00050     748
>DP00050     749
>DP00050     750
>DP00050     751
>DP00050     752
>DP00050     753
>DP00050     754
>DP00050     755
>DP00050     756
>DP00050     757
>DP00050     758
>DP00050     759
>DP00050     760
>DP00050     761
>DP00050     762
>DP00050     763
>DP00050     764
>DP00050     765
>DP00050     766
>DP00050     767
>DP00050     768
>DP00050     769
>DP00050     770
>DP00050     771
>DP00050     772
>DP00050     773
>DP00050     774
>DP00050     775
>DP00050     776
>DP00050     777
>DP00050     778
>DP00050     779
>DP00050     780
>DP00050     781
>DP00050     782
>DP00050     783
>DP00050     784
>DP00050     785
>DP00050     786
>DP00050     787
>DP00050     788
>DP00050     789
>DP00050     790
>DP00050     791
>DP00050     792
>DP00050     793
>DP00050     794
>DP00050     795
>DP00050     796
>DP00050     797
>DP00050     798
>DP00050     799
>DP00050     800
>DP00050     801
>DP00050     802
>DP00050     803
>DP00050     804
>DP00050     805
>DP00050     806
>DP00050     807
>DP00050     808
>DP00050     809
>DP00050     810
>DP00050     811
>DP00050     812
>DP00050     813
>DP00050     814
>DP00050     815
>DP00050     816
>DP00050     817
>DP00050     818
>DP00050     819
>DP00050     820
>DP00050     821
>DP00050     822
>DP00050     823
>DP00050     824
>DP00050     825
>DP00050     826
>DP00050     827
>DP00050     828
>DP00050     829
>DP00050     830
>DP00050     831
>DP00050     832
>DP00050     833
>DP00050     834
>DP00050     835
>DP00050     836
>DP00050     837
>DP00050     838
>DP00050     839
>DP00050     840
>DP00050     841
>DP00050     842
>DP00050     843
>DP00050     844
>DP00050     845
>DP00050     846
>DP00050     847
>DP00050     848
>DP00050     849
>DP00050     850
>DP00050     851
>DP00050     852
>DP00050     853
>DP00050     854
>DP00050     855
>DP00050     856
>DP00050     857
>DP00050     858
>DP00050     859
>DP00050     860
>DP00050     861
>DP00050     862
>DP00050     863
>DP00050     864
>DP00050     865
>DP00050     866
>DP00050     867
>DP00050     868
>DP00050     869
>DP00050     870
>DP00050     871
>DP00050     872
>DP00050     873
>DP00050     874
>DP00050     875
>DP00050     876
>DP00050     877
>DP00050     878
>DP00050     879
>DP00050     880
>DP00050     881
>DP00050     882
>DP00050     883
>DP00050     884
>DP00050     885
>DP00050     886
>DP00050     887
>DP00050     888
>DP00050     889
>DP00050     890
>DP00050     891
>DP00050     892
>DP00050     893
>DP00050     894
>DP00050     895
>DP00050     896
>DP00050     897
>DP00050     898
>DP00050     899
>DP00050     900
>DP00050     901
>DP00050     902
>DP00050     903
>DP00050     904
>DP00050     905
>DP00050     906
>DP00050     907
>DP00050     908
>DP00050     909
>DP00050     910
>DP00050     911
>DP00050     912
>DP00050     913
>DP00050     914
>DP00050     915
>DP00050     916
>DP00050     917
>DP00050     918
>DP00050     919
>DP00050     920
>DP00050     921
>DP00050     922
>DP00050     923
>DP00050     924
>DP00050     925
>DP00050     926
>DP00050     927
>DP00050     928
>DP00050     929
>DP00050     930
>DP00050     931
>DP00050     932
>DP00050     933
>DP00050     934
>DP00050     935
>DP00050     936
>DP00050     937
>DP00050     938
>DP00050     939
>DP00050     940
>DP00050     941
>DP00050     942
>DP00050     943
>DP00050     944
>DP00050     945
>DP00050     946
>DP00050     947
>DP00050     948
>DP00050     949
>DP00050     950
>DP00050     951
>DP00050     952
>DP00050     953
>DP00050     954
>DP00050     955
>DP00050     956
>DP00050     957
>DP00050     958
>DP00050     959
>DP00050     960
>DP00050     961
>DP00050     962
>DP00050     963
>DP00050     964
>DP00050     965
>DP00050     966
>DP00050     967
>DP00050     968
>DP00050     969
>DP00050     970
>DP00050     971
>DP00050     972
>DP00050     973
>DP00050     974
>DP00050     975
>DP00050     976
>DP00050     977
>DP00050     978
>DP00050     979
>DP00050     980
>DP00050     981
>DP00050     982
>DP00050     983
>DP00050     984
>DP00050     985
>DP00050     986
>DP00050     987
>DP00050     988
>DP00050     989
>DP00050     990
>DP00050     991
>DP00050     992
>DP00050     993
>DP00050     994
>DP00050     995
>DP00050     996
>DP00050     997
>DP00050     998
>DP00050     999
>DP00050     1000
>DP00050     1001
>DP00050     1002
>DP00050     1003
>DP00050     1004
>DP00050     1005
>DP00050     1006
>DP00050     1007
>DP00050     1008
>DP00050     1009
>DP00050     1010
>DP00050     1011
>DP00050     1012
>DP00050     1013
>DP00050     1014
>DP00050     1015
>DP00050     1016
>DP00050     1017
>DP00050     1018
>DP00050     1019
>DP00050     1020
>DP00050     1021
>DP00050     1022
>DP00050     1023
>DP00050     1024
>DP00050     1025
>DP00050     1026
>DP00050     1027
>DP00050     1028
>DP00050     1029
>DP00050     1030
>DP00050     1031
>DP00050     1032
>DP00050     1033
>DP00050     1034
>DP00050     1035
>DP00050     1036
>DP00050     1037
>DP00050     1038
>DP00050     1039
>DP00050     1040
>DP00050     1041
>DP00050     1042
>DP00050     1043
>DP00050     1044
>DP00050     1045
>DP00050     1046
>DP00050     1047
>DP00050     1048
>DP00050     1049
>DP00050     1050
>DP00050     1051
>DP00050     1052
>DP00050     1053
>DP00050     1054
>DP00050     1055
>DP00050     1056
>DP00050     1057
>DP00050     1058
>DP00050     1059
>DP00050     1060
>DP00050     1061
>DP00050     1062
>DP00050     1063
>DP00050     1064
>DP00050     1065
>DP00050     1066
>DP00050     1067
>DP00050     1068
>DP00050     1069
>DP00050     1070
>DP00050     1071
>DP00050     1072
>DP00050     1073
>DP00050     1074
>DP00050     1075
>DP00050     1076
>DP00050     1077
>DP00050     1078
>DP00050     1079
>DP00050     1080
>DP00050     1081
>DP00050     1082
>DP00050     1083
>DP00050     1084
>DP00050     1085
>DP00050     1086
>DP00050     1087
>DP00052     18
>DP00052     19
>DP00052     20
>DP00052     21
>DP00052     22
>DP00052     23
>DP00052     24
>DP00052     25
>DP00052     26
>DP00052     27
>DP00052     28
>DP00052     29
>DP00052     30
>DP00052     31
>DP00052     32
>DP00052     33
>DP00052     34
>DP00052     35
>DP00052     36
>DP00052     37
>DP00052     38
>DP00052     39
>DP00052     40
>DP00052     41
>DP00052     42
>DP00052     43
>DP00052     44
>DP00052     45
>DP00052     46
>DP00052     47
>DP00052     48
>DP00052     49
>DP00052     50
>DP00052     51
>DP00052     52
>DP00052     53
>DP00052     54
>DP00052     55
>DP00052     56
>DP00052     57
>DP00052     58
>DP00052     59
>DP00052     60
>DP00052     61
>DP00052     62
>DP00052     63
>DP00052     64
>DP00052     65
>DP00052     66
>DP00052     67
>DP00052     68
>DP00052     69
>DP00052     70
>DP00052     71
>DP00052     72
>DP00052     73
>DP00052     74
>DP00052     75
>DP00052     76
>DP00052     77
>DP00052     78
>DP00052     79
>DP00052     80
>DP00052     81
>DP00052     82
>DP00052     83
>DP00052     84
>DP00052     85
>DP00052     86
>DP00052     87
>DP00052     88
>DP00052     89
>DP00052     90
>DP00052     91
>DP00052     92
>DP00052     93
>DP00052     94
>DP00052     95
>DP00052     96
>DP00052     97
>DP00052     98
>DP00052     99
>DP00052     100
>DP00052     101
>DP00052     102
>DP00052     103
>DP00052     104
>DP00052     105
>DP00052     106
>DP00052     107
>DP00052     108
>DP00052     109
>DP00052     110
>DP00052     111
>DP00052     112
>DP00052     113
>DP00052     114
>DP00052     115
>DP00052     116
>DP00052     117
>DP00052     118
>DP00052     119
>DP00052     120
>DP00052     121
>DP00052     122
>DP00052     123
>DP00052     124
>DP00052     125
>DP00052     126
>DP00052     127
>DP00052     128
>DP00052     129
>DP00052     130
>DP00052     131
>DP00052     132
>DP00052     133
>DP00052     134
>DP00052     135
>DP00052     136
>DP00052     137
>DP00052     138
>DP00052     139
>DP00052     140
>DP00052     141
>DP00052     142
>DP00052     143
>DP00052     144
>DP00052     145
>DP00052     146
>DP00052     147
>DP00052     148
>DP00052     149
>DP00052     150
>DP00052     151
>DP00052     152
>DP00052     153
>DP00052     154
>DP00052     155
>DP00052     156
>DP00052     157
>DP00052     158
>DP00052     159
>DP00052     160
>DP00052     161
>DP00052     162
>DP00052     163
>DP00052     164
>DP00052     165
>DP00052     166
>DP00052     167
>DP00052     168
>DP00052     169
>DP00052     170
>DP00052     171
>DP00052     172
>DP00052     173
>DP00052     174
>DP00052     175
>DP00052     176
>DP00052     177
>DP00052     178
>DP00052     179
>DP00052     180
>DP00052     181
>DP00052     182
>DP00052     183
>DP00052     184
>DP00052     185
>DP00052     186
>DP00052     187
>DP00052     188
>DP00052     189
>DP00052     190
>DP00052     191
>DP00052     192
>DP00052     193
>DP00052     194
>DP00052     195
>DP00052     196
>DP00052     197
>DP00052     198
>DP00052     199
>DP00052     200
>DP00052     201
>DP00052     202
>DP00052     203
>DP00052     204
>DP00052     205
>DP00052     206
>DP00052     207
>DP00052     208
>DP00052     209
>DP00052     210
>DP00052     211
>DP00052     212
>DP00052     213
>DP00052     214
>DP00052     215
>DP00052     216
>DP00052     217
>DP00052     218
>DP00052     219
>DP00052     220
>DP00052     221
>DP00052     222
>DP00052     223
>DP00052     224
>DP00052     225
>DP00052     226
>DP00052     227
>DP00052     228
>DP00052     229
>DP00052     230
>DP00052     231
>DP00052     232
>DP00052     233
>DP00052     234
>DP00052     235
>DP00052     236
>DP00052     237
>DP00052     238
>DP00052     239
>DP00052     240
>DP00052     241
>DP00052     242
>DP00052     243
>DP00052     244
>DP00052     245
>DP00052     246
>DP00052     247
>DP00052     248
>DP00052     249
>DP00052     250
>DP00052     251
>DP00052     252
>DP00052     253
>DP00052     254
>DP00052     255
>DP00052     256
>DP00052     257
>DP00052     258
>DP00052     259
>DP00052     260
>DP00052     261
>DP00052     262
>DP00052     263
>DP00052     264
>DP00052     265
>DP00052     266
>DP00052     267
>DP00052     268
>DP00052     269
>DP00052     270
>DP00052     271
>DP00052     272
>DP00052     273
>DP00052     274
>DP00052     275
>DP00052     276
>DP00052     277
>DP00052     278
>DP00052     279
>DP00052     280
>DP00052     281
>DP00052     282
>DP00052     283
>DP00052     284
>DP00052     285
>DP00052     286
>DP00052     287
>DP00052     288
>DP00052     289
>DP00052     290
>DP00052     291
>DP00052     292
>DP00052     293
>DP00052     294
>DP00052     295
>DP00052     296
>DP00052     297
>DP00052     298
>DP00052     299
>DP00052     300
>DP00052     301
>DP00052     302
>DP00053     1
>DP00053     2
>DP00053     3
>DP00053     4
>DP00053     5
>DP00053     6
>DP00053     7
>DP00053     8
>DP00053     9
>DP00053     10
>DP00053     11
>DP00053     12
>DP00053     13
>DP00053     14
>DP00053     15
>DP00053     16
>DP00053     17
>DP00053     18
>DP00053     19
>DP00053     20
>DP00053     21
>DP00053     22
>DP00053     23
>DP00053     24
>DP00053     25
>DP00053     26
>DP00053     27
>DP00053     28
>DP00053     29
>DP00053     30
>DP00053     31
>DP00053     32
>DP00053     33
>DP00053     34
>DP00053     35
>DP00053     36
>DP00053     37
>DP00053     38
>DP00053     39
>DP00053     40
>DP00053     41
>DP00053     42
>DP00053     43
>DP00053     44
>DP00053     45
>DP00053     46
>DP00053     47
>DP00053     48
>DP00053     49
>DP00053     50
>DP00053     51
>DP00053     52
>DP00053     53
>DP00053     54
>DP00053     55
>DP00053     56
>DP00053     57
>DP00053     58
>DP00053     59
>DP00053     60
>DP00053     61
>DP00053     62
>DP00053     63
>DP00053     64
>DP00053     65
>DP00053     66
>DP00053     67
>DP00053     68
>DP00053     69
>DP00053     70
>DP00053     71
>DP00053     72
>DP00053     73
>DP00053     74
>DP00053     75
>DP00053     76
>DP00053     77
>DP00053     78
>DP00053     79
>DP00053     80
>DP00053     81
>DP00053     82
>DP00053     83
>DP00053     84
>DP00053     85
>DP00055     135
>DP00055     136
>DP00055     137
>DP00055     138
>DP00055     139
>DP00055     140
>DP00055     141
>DP00055     142
>DP00055     143
>DP00055     144
>DP00055     145
>DP00055     146
>DP00055     147
>DP00055     148
>DP00055     149
>DP00055     150
>DP00055     151
>DP00055     152
>DP00055     153
>DP00055     154
>DP00055     155
>DP00055     156
>DP00055     157
>DP00055     158
>DP00055     159
>DP00055     160
>DP00055     161
>DP00055     162
>DP00055     163
>DP00055     164
>DP00055     165
>DP00055     166
>DP00055     167
>DP00055     168
>DP00055     169
>DP00055     170
>DP00055     171
>DP00055     172
>DP00055     173
>DP00055     174
>DP00055     175
>DP00055     176
>DP00055     177
>DP00055     178
>DP00055     179
>DP00055     180
>DP00055     181
>DP00055     182
>DP00055     183
>DP00055     184
>DP00055     185
>DP00055     186
>DP00055     187
>DP00055     188
>DP00055     189
>DP00055     190
>DP00055     191
>DP00055     192
>DP00055     193
>DP00055     194
>DP00055     195
>DP00055     196
>DP00055     197
>DP00055     198
>DP00055     199
>DP00055     200
>DP00055     201
>DP00055     202
>DP00055     203
>DP00055     204
>DP00055     205
>DP00055     206
>DP00055     445
>DP00055     446
>DP00055     447
>DP00055     448
>DP00055     449
>DP00055     450
>DP00055     451
>DP00055     452
>DP00055     453
>DP00055     454
>DP00055     455
>DP00055     456
>DP00055     457
>DP00055     458
>DP00055     459
>DP00055     460
>DP00055     461
>DP00055     462
>DP00055     463
>DP00055     464
>DP00055     465
>DP00055     466
>DP00055     467
>DP00055     468
>DP00055     469
>DP00055     470
>DP00055     471
>DP00055     472
>DP00055     473
>DP00055     474
>DP00055     475
>DP00055     476
>DP00055     477
>DP00055     478
>DP00055     479
>DP00055     480
>DP00055     481
>DP00055     482
>DP00055     483
>DP00055     484
>DP00055     485
>DP00055     486
>DP00055     487
>DP00055     488
>DP00055     502
>DP00055     503
>DP00055     504
>DP00055     505
>DP00055     506
>DP00055     507
>DP00055     508
>DP00055     509
>DP00055     510
>DP00055     511
>DP00055     512
>DP00055     513
>DP00055     514
>DP00055     515
>DP00055     516
>DP00055     517
>DP00055     643
>DP00055     644
>DP00055     645
>DP00055     646
>DP00055     647
>DP00055     648
>DP00055     649
>DP00055     650
>DP00055     651
>DP00055     652
>DP00055     653
>DP00055     706
>DP00055     707
>DP00055     708
>DP00055     709
>DP00055     710
>DP00055     711
>DP00055     712
>DP00055     713
>DP00055     714
>DP00060     70
>DP00060     71
>DP00060     72
>DP00060     73
>DP00060     74
>DP00060     75
>DP00060     76
>DP00060     77
>DP00060     78
>DP00060     79
>DP00060     80
>DP00060     81
>DP00060     166
>DP00060     167
>DP00060     168
>DP00060     169
>DP00060     170
>DP00060     171
>DP00060     172
>DP00060     173
>DP00060     174
>DP00060     175
>DP00060     176
>DP00060     177
>DP00060     178
>DP00060     179
>DP00060     180
>DP00060     181
>DP00060     182
>DP00060     183
>DP00060     184
>DP00060     185
>DP00060     186
>DP00060     187
>DP00060     188
>DP00060     189
>DP00060     190
>DP00060     191
>DP00060     192
>DP00060     193
>DP00060     194
>DP00060     195
>DP00060     196
>DP00060     197
>DP00060     198
>DP00060     199
>DP00060     200
>DP00060     201
>DP00060     202
>DP00060     203
>DP00061     115
>DP00061     116
>DP00061     117
>DP00061     118
>DP00061     119
>DP00061     120
>DP00061     121
>DP00061     122
>DP00061     123
>DP00061     124
>DP00061     125
>DP00061     126
>DP00061     127
>DP00061     128
>DP00061     129
>DP00061     130
>DP00061     131
>DP00061     132
>DP00061     133
>DP00061     134
>DP00061     135
>DP00061     136
>DP00061     137
>DP00061     138
>DP00061     139
>DP00061     140
>DP00061     141
>DP00061     142
>DP00061     143
>DP00061     144
>DP00061     145
>DP00061     146
>DP00061     147
>DP00061     148
>DP00061     149
>DP00061     150
>DP00061     151
>DP00061     152
>DP00061     153
>DP00061     154
>DP00061     155
>DP00061     156
>DP00061     157
>DP00061     158
>DP00061     159
>DP00061     160
>DP00061     161
>DP00061     162
>DP00061     163
>DP00061     164
>DP00061     165
>DP00061     166
>DP00061     167
>DP00061     168
>DP00062     169
>DP00062     170
>DP00062     171
>DP00062     172
>DP00062     173
>DP00062     174
>DP00062     175
>DP00062     176
>DP00062     177
>DP00062     178
>DP00062     179
>DP00062     180
>DP00062     181
>DP00062     182
>DP00062     183
>DP00062     184
>DP00062     185
>DP00062     186
>DP00062     187
>DP00062     188
>DP00062     189
>DP00062     202
>DP00062     203
>DP00062     204
>DP00062     205
>DP00062     206
>DP00064     1
>DP00064     2
>DP00064     3
>DP00064     4
>DP00064     5
>DP00064     6
>DP00064     7
>DP00064     8
>DP00064     9
>DP00064     10
>DP00064     11
>DP00064     12
>DP00064     13
>DP00064     14
>DP00064     15
>DP00064     16
>DP00064     17
>DP00064     18
>DP00064     19
>DP00064     20
>DP00064     21
>DP00064     22
>DP00064     23
>DP00064     24
>DP00064     25
>DP00064     26
>DP00064     27
>DP00064     28
>DP00064     29
>DP00064     30
>DP00064     31
>DP00064     32
>DP00064     33
>DP00064     34
>DP00064     35
>DP00064     36
>DP00064     37
>DP00064     38
>DP00064     39
>DP00064     40
>DP00064     41
>DP00064     42
>DP00064     43
>DP00064     44
>DP00064     45
>DP00064     46
>DP00064     47
>DP00064     48
>DP00064     49
>DP00064     50
>DP00064     51
>DP00064     52
>DP00064     53
>DP00064     54
>DP00064     55
>DP00064     56
>DP00064     57
>DP00064     58
>DP00064     59
>DP00064     60
>DP00064     61
>DP00064     62
>DP00064     63
>DP00064     64
>DP00066     1
>DP00066     2
>DP00066     3
>DP00066     4
>DP00066     5
>DP00066     6
>DP00066     7
>DP00066     8
>DP00066     9
>DP00066     10
>DP00066     11
>DP00066     12
>DP00066     13
>DP00066     14
>DP00066     15
>DP00066     16
>DP00066     17
>DP00066     18
>DP00066     19
>DP00066     20
>DP00066     21
>DP00066     22
>DP00066     23
>DP00066     24
>DP00066     25
>DP00066     26
>DP00066     27
>DP00066     28
>DP00066     29
>DP00066     30
>DP00066     31
>DP00066     32
>DP00066     33
>DP00066     34
>DP00066     35
>DP00066     36
>DP00066     37
>DP00066     38
>DP00066     39
>DP00066     40
>DP00066     41
>DP00066     42
>DP00066     43
>DP00066     44
>DP00066     45
>DP00066     46
>DP00066     47
>DP00066     48
>DP00066     49
>DP00066     50
>DP00066     51
>DP00066     52
>DP00066     53
>DP00066     54
>DP00066     55
>DP00066     56
>DP00066     57
>DP00066     58
>DP00066     59
>DP00066     60
>DP00066     61
>DP00066     62
>DP00066     63
>DP00066     64
>DP00066     65
>DP00066     66
>DP00066     67
>DP00066     68
>DP00066     69
>DP00066     70
>DP00066     71
>DP00066     72
>DP00066     73
>DP00066     74
>DP00066     75
>DP00066     76
>DP00066     77
>DP00066     78
>DP00066     79
>DP00066     80
>DP00066     81
>DP00066     82
>DP00066     83
>DP00066     84
>DP00066     85
>DP00066     86
>DP00066     87
>DP00066     88
>DP00066     89
>DP00066     90
>DP00066     91
>DP00066     92
>DP00066     93
>DP00066     94
>DP00066     95
>DP00066     96
>DP00066     97
>DP00066     98
>DP00066     99
>DP00066     100
>DP00066     101
>DP00066     102
>DP00066     103
>DP00066     104
>DP00066     105
>DP00066     106
>DP00067     1
>DP00067     2
>DP00067     3
>DP00067     4
>DP00067     5
>DP00067     6
>DP00067     7
>DP00067     8
>DP00067     9
>DP00067     10
>DP00067     11
>DP00067     12
>DP00067     13
>DP00067     14
>DP00067     15
>DP00067     16
>DP00067     17
>DP00067     18
>DP00067     19
>DP00067     20
>DP00067     21
>DP00067     22
>DP00067     23
>DP00067     24
>DP00067     25
>DP00067     26
>DP00067     27
>DP00067     28
>DP00067     29
>DP00067     30
>DP00067     31
>DP00067     32
>DP00069     1
>DP00069     2
>DP00069     3
>DP00069     4
>DP00069     5
>DP00069     6
>DP00069     7
>DP00069     8
>DP00069     9
>DP00069     10
>DP00069     11
>DP00069     12
>DP00069     13
>DP00069     14
>DP00069     15
>DP00069     16
>DP00069     17
>DP00069     18
>DP00069     19
>DP00069     20
>DP00069     21
>DP00069     22
>DP00069     23
>DP00069     24
>DP00069     25
>DP00069     26
>DP00069     27
>DP00069     28
>DP00069     29
>DP00069     30
>DP00069     31
>DP00069     32
>DP00069     33
>DP00069     34
>DP00069     35
>DP00069     36
>DP00069     37
>DP00069     38
>DP00069     39
>DP00069     40
>DP00069     41
>DP00069     42
>DP00069     43
>DP00069     44
>DP00069     45
>DP00069     46
>DP00069     47
>DP00069     48
>DP00069     49
>DP00069     50
>DP00069     51
>DP00069     52
>DP00069     53
>DP00069     54
>DP00069     55
>DP00069     56
>DP00069     57
>DP00069     58
>DP00069     59
>DP00069     60
>DP00069     61
>DP00069     62
>DP00069     63
>DP00069     64
>DP00069     65
>DP00069     66
>DP00069     67
>DP00069     68
>DP00069     69
>DP00069     70
>DP00069     71
>DP00069     72
>DP00069     73
>DP00069     74
>DP00069     75
>DP00069     76
>DP00069     77
>DP00069     78
>DP00069     79
>DP00069     80
>DP00069     81
>DP00069     82
>DP00069     83
>DP00069     84
>DP00069     85
>DP00069     86
>DP00069     87
>DP00069     88
>DP00069     89
>DP00069     90
>DP00069     91
>DP00069     92
>DP00069     93
>DP00069     94
>DP00069     95
>DP00069     96
>DP00069     97
>DP00069     98
>DP00069     99
>DP00069     100
>DP00069     101
>DP00069     102
>DP00069     103
>DP00069     104
>DP00069     105
>DP00069     106
>DP00069     107
>DP00069     108
>DP00069     109
>DP00069     110
>DP00069     111
>DP00069     112
>DP00069     113
>DP00069     114
>DP00069     115
>DP00069     116
>DP00070     1
>DP00070     2
>DP00070     3
>DP00070     4
>DP00070     5
>DP00070     6
>DP00070     7
>DP00070     8
>DP00070     9
>DP00070     10
>DP00070     11
>DP00070     12
>DP00070     13
>DP00070     14
>DP00070     15
>DP00070     16
>DP00070     17
>DP00070     18
>DP00070     19
>DP00070     20
>DP00070     21
>DP00070     22
>DP00070     23
>DP00070     24
>DP00070     25
>DP00070     26
>DP00070     27
>DP00070     28
>DP00070     29
>DP00070     30
>DP00070     31
>DP00070     32
>DP00070     33
>DP00070     34
>DP00070     35
>DP00070     36
>DP00070     37
>DP00070     38
>DP00070     39
>DP00070     40
>DP00070     41
>DP00070     42
>DP00070     43
>DP00070     44
>DP00070     45
>DP00070     46
>DP00070     47
>DP00070     48
>DP00070     49
>DP00070     50
>DP00070     51
>DP00070     52
>DP00070     53
>DP00070     54
>DP00070     55
>DP00070     56
>DP00070     57
>DP00070     58
>DP00070     59
>DP00070     60
>DP00070     61
>DP00070     62
>DP00070     63
>DP00070     64
>DP00070     65
>DP00070     66
>DP00070     67
>DP00070     68
>DP00070     69
>DP00070     70
>DP00070     71
>DP00070     72
>DP00070     73
>DP00070     74
>DP00070     75
>DP00070     76
>DP00070     77
>DP00070     78
>DP00070     79
>DP00070     80
>DP00070     81
>DP00070     82
>DP00070     83
>DP00070     84
>DP00070     85
>DP00070     86
>DP00070     87
>DP00070     88
>DP00070     89
>DP00070     90
>DP00070     91
>DP00070     92
>DP00070     93
>DP00070     94
>DP00070     95
>DP00070     96
>DP00070     97
>DP00070     98
>DP00070     99
>DP00070     100
>DP00070     101
>DP00070     102
>DP00070     103
>DP00070     104
>DP00070     105
>DP00070     106
>DP00070     107
>DP00070     108
>DP00070     109
>DP00070     110
>DP00070     111
>DP00070     112
>DP00070     113
>DP00070     114
>DP00070     115
>DP00070     116
>DP00070     117
>DP00070     118
>DP00070     119
>DP00070     120
>DP00070     121
>DP00070     122
>DP00070     123
>DP00070     124
>DP00070     125
>DP00070     126
>DP00070     127
>DP00070     128
>DP00070     129
>DP00070     130
>DP00070     131
>DP00070     132
>DP00070     133
>DP00070     134
>DP00070     135
>DP00070     136
>DP00070     137
>DP00070     138
>DP00070     139
>DP00070     140
>DP00073     1
>DP00073     2
>DP00073     3
>DP00073     4
>DP00073     5
>DP00073     6
>DP00073     7
>DP00073     8
>DP00073     9
>DP00073     10
>DP00073     11
>DP00073     12
>DP00073     13
>DP00073     14
>DP00073     15
>DP00073     16
>DP00073     17
>DP00073     18
>DP00073     19
>DP00073     20
>DP00073     21
>DP00073     22
>DP00073     23
>DP00073     24
>DP00073     25
>DP00073     26
>DP00073     27
>DP00073     93
>DP00073     94
>DP00073     95
>DP00073     96
>DP00073     97
>DP00073     98
>DP00073     99
>DP00073     100
>DP00073     101
>DP00073     102
>DP00073     103
>DP00073     104
>DP00073     105
>DP00073     106
>DP00073     107
>DP00073     108
>DP00073     109
>DP00073     110
>DP00073     111
>DP00073     112
>DP00073     113
>DP00073     114
>DP00073     115
>DP00073     116
>DP00073     117
>DP00073     118
>DP00073     119
>DP00073     120
>DP00073     121
>DP00073     122
>DP00073     123
>DP00073     124
>DP00073     125
>DP00073     126
>DP00073     127
>DP00073     128
>DP00073     129
>DP00073     130
>DP00073     131
>DP00073     132
>DP00073     142
>DP00073     143
>DP00073     144
>DP00073     145
>DP00073     146
>DP00073     147
>DP00073     148
>DP00073     149
>DP00073     150
>DP00073     151
>DP00073     152
>DP00073     153
>DP00073     154
>DP00073     155
>DP00073     156
>DP00073     157
>DP00074     1
>DP00074     2
>DP00074     3
>DP00074     4
>DP00074     5
>DP00074     6
>DP00074     7
>DP00074     8
>DP00074     9
>DP00074     10
>DP00074     11
>DP00074     12
>DP00074     13
>DP00074     14
>DP00074     15
>DP00074     16
>DP00074     17
>DP00074     18
>DP00074     19
>DP00074     20
>DP00074     21
>DP00074     22
>DP00074     23
>DP00074     24
>DP00074     25
>DP00074     26
>DP00074     27
>DP00074     28
>DP00074     29
>DP00074     30
>DP00074     31
>DP00074     32
>DP00074     33
>DP00074     34
>DP00074     35
>DP00074     36
>DP00074     37
>DP00074     38
>DP00074     39
>DP00074     40
>DP00074     41
>DP00074     42
>DP00074     43
>DP00074     44
>DP00074     45
>DP00074     46
>DP00074     47
>DP00074     48
>DP00074     49
>DP00074     50
>DP00074     51
>DP00074     52
>DP00074     53
>DP00074     54
>DP00074     55
>DP00074     56
>DP00074     57
>DP00074     58
>DP00074     59
>DP00074     60
>DP00074     61
>DP00074     62
>DP00074     63
>DP00074     64
>DP00074     65
>DP00074     66
>DP00074     67
>DP00074     68
>DP00074     69
>DP00074     70
>DP00074     71
>DP00074     72
>DP00074     73
>DP00074     74
>DP00074     75
>DP00074     76
>DP00074     77
>DP00074     78
>DP00074     79
>DP00074     80
>DP00074     81
>DP00074     82
>DP00074     83
>DP00074     84
>DP00074     85
>DP00074     86
>DP00074     87
>DP00074     88
>DP00074     89
>DP00074     90
>DP00074     91
>DP00074     92
>DP00074     93
>DP00074     94
>DP00074     95
>DP00074     96
>DP00074     97
>DP00074     98
>DP00074     99
>DP00074     100
>DP00074     101
>DP00074     102
>DP00074     103
>DP00074     104
>DP00074     105
>DP00074     106
>DP00074     107
>DP00074     108
>DP00074     109
>DP00074     110
>DP00074     111
>DP00074     112
>DP00074     113
>DP00074     114
>DP00074     115
>DP00074     116
>DP00074     117
>DP00074     118
>DP00074     119
>DP00074     120
>DP00074     121
>DP00074     122
>DP00074     123
>DP00074     124
>DP00074     125
>DP00074     126
>DP00074     127
>DP00074     128
>DP00074     129
>DP00074     130
>DP00074     131
>DP00074     132
>DP00074     133
>DP00074     134
>DP00074     135
>DP00074     136
>DP00074     137
>DP00074     138
>DP00074     139
>DP00074     140
>DP00074     141
>DP00074     142
>DP00074     143
>DP00074     144
>DP00074     145
>DP00074     146
>DP00074     147
>DP00074     148
>DP00074     149
>DP00074     150
>DP00074     151
>DP00074     152
>DP00074     153
>DP00074     154
>DP00074     155
>DP00074     156
>DP00074     157
>DP00074     158
>DP00074     159
>DP00074     160
>DP00074     161
>DP00074     162
>DP00074     163
>DP00074     164
>DP00074     165
>DP00074     166
>DP00074     167
>DP00074     168
>DP00074     169
>DP00074     170
>DP00074     171
>DP00074     172
>DP00074     173
>DP00074     174
>DP00074     175
>DP00074     176
>DP00074     177
>DP00074     178
>DP00074     179
>DP00074     180
>DP00074     181
>DP00074     182
>DP00074     183
>DP00074     184
>DP00074     221
>DP00074     222
>DP00074     223
>DP00074     224
>DP00074     225
>DP00074     226
>DP00074     227
>DP00074     228
>DP00074     229
>DP00074     230
>DP00074     231
>DP00074     232
>DP00074     233
>DP00074     234
>DP00074     235
>DP00074     236
>DP00074     237
>DP00074     253
>DP00074     254
>DP00074     255
>DP00074     256
>DP00074     257
>DP00074     258
>DP00074     259
>DP00074     260
>DP00074     261
>DP00074     262
>DP00075     1
>DP00075     2
>DP00075     3
>DP00075     4
>DP00075     5
>DP00075     6
>DP00075     7
>DP00075     8
>DP00075     9
>DP00075     10
>DP00075     11
>DP00075     12
>DP00075     13
>DP00075     14
>DP00075     15
>DP00075     16
>DP00075     17
>DP00075     18
>DP00075     19
>DP00075     20
>DP00075     21
>DP00075     22
>DP00075     23
>DP00075     24
>DP00075     25
>DP00075     26
>DP00075     27
>DP00075     28
>DP00075     29
>DP00075     30
>DP00075     31
>DP00075     32
>DP00075     33
>DP00075     34
>DP00075     35
>DP00075     36
>DP00075     37
>DP00075     38
>DP00075     39
>DP00075     40
>DP00075     41
>DP00075     42
>DP00075     43
>DP00075     44
>DP00075     45
>DP00075     46
>DP00075     47
>DP00075     48
>DP00075     49
>DP00075     50
>DP00075     51
>DP00075     52
>DP00075     53
>DP00075     54
>DP00075     55
>DP00075     56
>DP00075     57
>DP00075     58
>DP00075     59
>DP00075     60
>DP00075     61
>DP00075     62
>DP00075     63
>DP00075     64
>DP00075     65
>DP00075     66
>DP00075     67
>DP00075     68
>DP00075     69
>DP00075     70
>DP00075     71
>DP00075     72
>DP00075     73
>DP00075     74
>DP00075     75
>DP00075     76
>DP00075     77
>DP00075     78
>DP00075     79
>DP00075     80
>DP00075     81
>DP00075     82
>DP00075     83
>DP00075     84
>DP00075     85
>DP00075     86
>DP00075     87
>DP00075     88
>DP00075     89
>DP00075     90
>DP00075     91
>DP00075     92
>DP00075     93
>DP00075     94
>DP00075     95
>DP00075     96
>DP00075     97
>DP00075     98
>DP00075     99
>DP00075     100
>DP00075     101
>DP00075     102
>DP00075     103
>DP00075     104
>DP00075     105
>DP00075     106
>DP00075     107
>DP00075     108
>DP00075     109
>DP00075     110
>DP00075     111
>DP00075     112
>DP00075     113
>DP00075     114
>DP00075     115
>DP00075     116
>DP00075     117
>DP00075     118
>DP00075     119
>DP00075     120
>DP00075     121
>DP00075     122
>DP00075     123
>DP00075     124
>DP00075     125
>DP00075     126
>DP00075     127
>DP00075     128
>DP00075     129
>DP00075     130
>DP00075     131
>DP00075     132
>DP00075     133
>DP00075     134
>DP00075     135
>DP00075     136
>DP00075     137
>DP00075     138
>DP00075     139
>DP00075     140
>DP00075     141
>DP00075     142
>DP00075     143
>DP00075     144
>DP00075     145
>DP00075     146
>DP00075     147
>DP00075     148
>DP00075     149
>DP00075     150
>DP00075     151
>DP00075     152
>DP00075     153
>DP00075     154
>DP00075     155
>DP00075     156
>DP00075     157
>DP00075     158
>DP00075     159
>DP00075     160
>DP00075     161
>DP00075     162
>DP00075     163
>DP00075     164
>DP00075     165
>DP00075     166
>DP00075     167
>DP00075     168
>DP00075     169
>DP00075     170
>DP00075     171
>DP00075     172
>DP00075     173
>DP00075     174
>DP00075     175
>DP00075     176
>DP00075     177
>DP00075     178
>DP00075     179
>DP00075     180
>DP00075     181
>DP00075     182
>DP00075     183
>DP00075     184
>DP00075     185
>DP00075     186
>DP00075     187
>DP00075     188
>DP00075     189
>DP00075     190
>DP00075     191
>DP00075     192
>DP00075     193
>DP00075     194
>DP00075     195
>DP00075     196
>DP00075     197
>DP00075     198
>DP00075     199
>DP00075     200
>DP00075     201
>DP00075     202
>DP00075     203
>DP00075     204
>DP00075     205
>DP00075     206
>DP00075     207
>DP00075     208
>DP00075     209
>DP00075     210
>DP00075     211
>DP00075     212
>DP00075     213
>DP00075     214
>DP00075     620
>DP00075     621
>DP00075     622
>DP00075     623
>DP00075     624
>DP00075     625
>DP00075     626
>DP00075     627
>DP00075     628
>DP00075     629
>DP00075     630
>DP00075     631
>DP00075     632
>DP00075     633
>DP00075     634
>DP00075     635
>DP00075     636
>DP00075     637
>DP00075     638
>DP00075     639
>DP00075     640
>DP00075     641
>DP00075     642
>DP00075     643
>DP00075     644
>DP00075     645
>DP00075     646
>DP00075     647
>DP00075     648
>DP00075     649
>DP00075     650
>DP00075     651
>DP00075     652
>DP00075     653
>DP00075     654
>DP00075     655
>DP00075     656
>DP00075     657
>DP00075     658
>DP00075     659
>DP00075     660
>DP00075     661
>DP00075     662
>DP00075     663
>DP00075     664
>DP00075     665
>DP00075     666
>DP00075     667
>DP00075     668
>DP00075     669
>DP00075     670
>DP00075     671
>DP00075     672
>DP00075     673
>DP00075     674
>DP00075     675
>DP00075     676
>DP00075     677
>DP00075     678
>DP00075     679
>DP00075     680
>DP00075     681
>DP00075     682
>DP00075     683
>DP00075     684
>DP00075     685
>DP00075     686
>DP00075     687
>DP00075     688
>DP00075     689
>DP00075     690
>DP00075     691
>DP00075     692
>DP00075     693
>DP00075     694
>DP00075     695
>DP00075     696
>DP00075     697
>DP00075     698
>DP00075     699
>DP00075     700
>DP00075     701
>DP00075     702
>DP00075     703
>DP00075     704
>DP00075     705
>DP00075     706
>DP00075     707
>DP00075     708
>DP00075     709
>DP00075     710
>DP00075     711
>DP00075     712
>DP00075     713
>DP00075     714
>DP00075     715
>DP00075     716
>DP00075     717
>DP00075     718
>DP00075     719
>DP00075     720
>DP00075     721
>DP00075     722
>DP00075     723
>DP00075     724
>DP00076     410
>DP00076     411
>DP00076     412
>DP00076     413
>DP00076     414
>DP00076     415
>DP00076     416
>DP00076     417
>DP00076     418
>DP00076     419
>DP00076     420
>DP00076     485
>DP00076     486
>DP00076     487
>DP00076     488
>DP00076     489
>DP00076     527
>DP00076     528
>DP00076     529
>DP00076     530
>DP00076     531
>DP00076     631
>DP00076     632
>DP00076     633
>DP00076     634
>DP00076     635
>DP00076     636
>DP00076     637
>DP00076     638
>DP00076     639
>DP00076     640
>DP00076     641
>DP00076     642
>DP00076     643
>DP00076     644
>DP00076     645
>DP00076     646
>DP00076     647
>DP00076     648
>DP00076     649
>DP00076     650
>DP00076     651
>DP00076     652
>DP00076     653
>DP00076     654
>DP00076     655
>DP00076     656
>DP00076     657
>DP00076     658
>DP00076     659
>DP00076     660
>DP00076     661
>DP00076     662
>DP00076     663
>DP00076     664
>DP00076     665
>DP00076     666
>DP00076     667
>DP00076     668
>DP00076     669
>DP00076     670
>DP00076     671
>DP00076     672
>DP00076     673
>DP00076     674
>DP00076     675
>DP00076     676
>DP00076     677
>DP00076     678
>DP00076     679
>DP00076     680
>DP00076     681
>DP00076     1072
>DP00076     1073
>DP00076     1074
>DP00076     1075
>DP00076     1076
>DP00076     1077
>DP00076     1078
>DP00076     1079
>DP00076     1080
>DP00076     1081
>DP00076     1082
>DP00076     1083
>DP00076     1084
>DP00076     1085
>DP00076     1086
>DP00076     1087
>DP00076     1088
>DP00076     1089
>DP00076     1090
>DP00076     1091
>DP00076     1092
>DP00076     1093
>DP00076     1094
>DP00076     1095
>DP00076     1096
>DP00076     1097
>DP00076     1098
>DP00076     1099
>DP00076     1100
>DP00076     1101
>DP00076     1102
>DP00076     1103
>DP00076     1104
>DP00076     1105
>DP00076     1106
>DP00076     1107
>DP00076     1179
>DP00076     1180
>DP00076     1181
>DP00076     1182
>DP00076     1183
>DP00076     1184
>DP00076     1185
>DP00076     1186
>DP00076     1187
>DP00076     1188
>DP00076     1189
>DP00076     1190
>DP00076     1191
>DP00076     1192
>DP00076     1193
>DP00076     1194
>DP00076     1195
>DP00076     1196
>DP00076     1197
>DP00076     1198
>DP00076     1199
>DP00076     1200
>DP00076     1201
>DP00076     1202
>DP00076     1203
>DP00076     1204
>DP00076     1205
>DP00076     1206
>DP00076     1207
>DP00076     1208
>DP00076     1209
>DP00076     1210
>DP00076     1211
>DP00076     1212
>DP00076     1213
>DP00076     1214
>DP00076     1215
>DP00076     1216
>DP00076     1217
>DP00076     1218
>DP00076     1219
>DP00076     1220
>DP00076     1221
>DP00076     1222
>DP00076     1223
>DP00076     1224
>DP00076     1225
>DP00076     1226
>DP00076     1227
>DP00076     1228
>DP00076     1229
>DP00076     1230
>DP00076     1231
>DP00076     1232
>DP00076     1233
>DP00076     1234
>DP00076     1235
>DP00076     1236
>DP00076     1237
>DP00076     1238
>DP00076     1239
>DP00076     1240
>DP00076     1241
>DP00076     1242
>DP00076     1243
>DP00076     1244
>DP00076     1245
>DP00076     1246
>DP00076     1247
>DP00076     1248
>DP00076     1249
>DP00076     1250
>DP00076     1251
>DP00076     1252
>DP00076     1253
>DP00076     1254
>DP00076     1255
>DP00076     1256
>DP00076     1257
>DP00076     1258
>DP00076     1259
>DP00076     1260
>DP00076     1261
>DP00076     1262
>DP00076     1263
>DP00076     1264
>DP00076     1265
>DP00076     1266
>DP00076     1267
>DP00076     1268
>DP00076     1269
>DP00076     1270
>DP00076     1271
>DP00076     1272
>DP00076     1273
>DP00076     1274
>DP00076     1275
>DP00076     1276
>DP00076     1277
>DP00076     1278
>DP00076     1279
>DP00076     1280
>DP00076     1281
>DP00076     1282
>DP00076     1283
>DP00076     1284
>DP00076     1285
>DP00076     1286
>DP00076     1287
>DP00076     1288
>DP00076     1289
>DP00076     1290
>DP00076     1291
>DP00076     1292
>DP00076     1293
>DP00076     1294
>DP00076     1295
>DP00076     1296
>DP00076     1297
>DP00076     1298
>DP00076     1299
>DP00076     1300
>DP00076     1301
>DP00076     1302
>DP00076     1303
>DP00076     1304
>DP00076     1305
>DP00076     1306
>DP00076     1307
>DP00076     1308
>DP00076     1309
>DP00076     1310
>DP00076     1311
>DP00076     1312
>DP00076     1313
>DP00076     1314
>DP00076     1315
>DP00076     1316
>DP00076     1317
>DP00076     1318
>DP00076     1319
>DP00076     1320
>DP00076     1321
>DP00076     1322
>DP00076     1323
>DP00076     1324
>DP00076     1325
>DP00076     1326
>DP00076     1327
>DP00076     1328
>DP00076     1329
>DP00076     1330
>DP00076     1331
>DP00076     1332
>DP00076     1333
>DP00076     1334
>DP00076     1335
>DP00076     1336
>DP00076     1337
>DP00076     1338
>DP00076     1339
>DP00076     1340
>DP00076     1341
>DP00076     1342
>DP00076     1343
>DP00076     1344
>DP00076     1345
>DP00076     1346
>DP00076     1347
>DP00076     1348
>DP00076     1349
>DP00076     1350
>DP00076     1351
>DP00076     1352
>DP00076     1353
>DP00076     1354
>DP00076     1355
>DP00076     1356
>DP00076     1357
>DP00076     1358
>DP00076     1359
>DP00076     1360
>DP00076     1361
>DP00076     1362
>DP00076     1363
>DP00076     1364
>DP00076     1365
>DP00076     1366
>DP00076     1367
>DP00076     1368
>DP00076     1369
>DP00076     1370
>DP00076     1371
>DP00076     1372
>DP00076     1373
>DP00076     1374
>DP00076     1375
>DP00076     1376
>DP00076     1377
>DP00076     1378
>DP00076     1379
>DP00076     1380
>DP00076     1381
>DP00076     1382
>DP00076     1383
>DP00076     1384
>DP00076     1385
>DP00076     1386
>DP00076     1387
>DP00076     1388
>DP00076     1389
>DP00076     1390
>DP00076     1391
>DP00076     1392
>DP00076     1393
>DP00076     1394
>DP00076     1395
>DP00076     1396
>DP00076     1397
>DP00076     1398
>DP00076     1399
>DP00076     1400
>DP00076     1401
>DP00076     1402
>DP00076     1403
>DP00076     1404
>DP00076     1405
>DP00076     1406
>DP00076     1407
>DP00076     1408
>DP00076     1409
>DP00076     1410
>DP00076     1411
>DP00076     1412
>DP00076     1413
>DP00076     1414
>DP00076     1415
>DP00076     1416
>DP00076     1417
>DP00076     1418
>DP00076     1419
>DP00076     1420
>DP00076     1421
>DP00076     1422
>DP00076     1423
>DP00076     1424
>DP00076     1425
>DP00076     1426
>DP00076     1427
>DP00076     1428
>DP00077     75
>DP00077     76
>DP00077     77
>DP00077     78
>DP00077     79
>DP00077     80
>DP00077     81
>DP00077     82
>DP00077     83
>DP00077     84
>DP00077     85
>DP00077     86
>DP00077     87
>DP00077     88
>DP00077     89
>DP00077     90
>DP00077     91
>DP00077     92
>DP00077     93
>DP00077     94
>DP00077     95
>DP00077     96
>DP00077     97
>DP00077     98
>DP00077     99
>DP00077     100
>DP00077     101
>DP00077     102
>DP00077     103
>DP00077     104
>DP00077     155
>DP00077     156
>DP00077     157
>DP00077     158
>DP00077     159
>DP00077     160
>DP00077     161
>DP00079     1
>DP00079     2
>DP00079     3
>DP00079     4
>DP00079     5
>DP00079     6
>DP00079     7
>DP00079     8
>DP00079     9
>DP00079     10
>DP00079     11
>DP00079     12
>DP00079     13
>DP00079     14
>DP00079     15
>DP00079     16
>DP00079     17
>DP00079     18
>DP00079     19
>DP00079     20
>DP00079     21
>DP00079     22
>DP00079     23
>DP00079     24
>DP00079     25
>DP00079     26
>DP00079     27
>DP00079     28
>DP00079     29
>DP00079     30
>DP00079     31
>DP00079     32
>DP00079     33
>DP00079     34
>DP00079     35
>DP00079     36
>DP00079     37
>DP00079     38
>DP00079     39
>DP00079     40
>DP00079     41
>DP00079     42
>DP00079     43
>DP00079     44
>DP00079     45
>DP00079     46
>DP00079     47
>DP00079     48
>DP00079     49
>DP00079     50
>DP00079     51
>DP00079     52
>DP00079     53
>DP00079     54
>DP00079     55
>DP00079     56
>DP00079     57
>DP00079     58
>DP00079     59
>DP00079     60
>DP00079     61
>DP00079     62
>DP00079     63
>DP00079     64
>DP00079     65
>DP00079     66
>DP00079     67
>DP00079     68
>DP00079     69
>DP00079     70
>DP00079     71
>DP00079     72
>DP00079     73
>DP00079     74
>DP00079     75
>DP00079     76
>DP00079     77
>DP00079     78
>DP00079     79
>DP00079     80
>DP00079     81
>DP00079     82
>DP00079     83
>DP00079     84
>DP00079     85
>DP00079     86
>DP00079     87
>DP00079     88
>DP00079     89
>DP00079     90
>DP00079     91
>DP00079     92
>DP00079     93
>DP00079     94
>DP00079     95
>DP00079     96
>DP00079     97
>DP00079     98
>DP00079     99
>DP00079     100
>DP00079     101
>DP00079     102
>DP00079     103
>DP00080     101
>DP00080     102
>DP00080     103
>DP00080     104
>DP00080     105
>DP00080     106
>DP00080     107
>DP00080     108
>DP00080     109
>DP00080     110
>DP00080     111
>DP00080     112
>DP00080     113
>DP00080     114
>DP00080     115
>DP00080     116
>DP00080     117
>DP00080     118
>DP00080     119
>DP00080     120
>DP00080     121
>DP00080     122
>DP00080     123
>DP00080     124
>DP00080     125
>DP00080     126
>DP00080     127
>DP00080     128
>DP00080     129
>DP00080     130
>DP00080     131
>DP00080     132
>DP00080     133
>DP00080     134
>DP00080     135
>DP00080     136
>DP00080     137
>DP00080     138
>DP00080     139
>DP00080     140
>DP00080     141
>DP00080     142
>DP00080     143
>DP00080     144
>DP00080     145
>DP00080     146
>DP00080     147
>DP00080     148
>DP00080     149
>DP00080     150
>DP00080     151
>DP00080     152
>DP00080     153
>DP00080     154
>DP00080     155
>DP00080     156
>DP00080     157
>DP00080     158
>DP00080     159
>DP00080     160
>DP00081     11
>DP00081     12
>DP00081     13
>DP00081     14
>DP00081     15
>DP00081     16
>DP00081     17
>DP00081     18
>DP00081     19
>DP00081     20
>DP00081     21
>DP00081     22
>DP00081     23
>DP00081     24
>DP00081     25
>DP00081     26
>DP00081     27
>DP00081     28
>DP00081     29
>DP00081     30
>DP00081     31
>DP00081     32
>DP00081     33
>DP00081     34
>DP00081     35
>DP00081     36
>DP00081     37
>DP00081     38
>DP00081     39
>DP00081     40
>DP00081     41
>DP00081     42
>DP00081     43
>DP00081     44
>DP00081     45
>DP00081     46
>DP00081     47
>DP00081     48
>DP00081     49
>DP00081     50
>DP00081     51
>DP00081     52
>DP00081     53
>DP00081     54
>DP00081     55
>DP00081     56
>DP00081     57
>DP00081     58
>DP00081     59
>DP00081     60
>DP00081     61
>DP00081     62
>DP00081     63
>DP00081     64
>DP00081     65
>DP00081     66
>DP00081     67
>DP00081     68
>DP00081     69
>DP00081     70
>DP00081     71
>DP00081     72
>DP00081     73
>DP00081     74
>DP00081     75
>DP00081     76
>DP00081     77
>DP00082     393
>DP00082     394
>DP00082     395
>DP00082     396
>DP00082     397
>DP00082     398
>DP00082     399
>DP00082     400
>DP00082     401
>DP00082     402
>DP00082     403
>DP00082     404
>DP00082     405
>DP00082     406
>DP00082     407
>DP00082     408
>DP00082     409
>DP00082     410
>DP00082     411
>DP00082     412
>DP00082     413
>DP00082     414
>DP00082     415
>DP00082     416
>DP00082     417
>DP00082     418
>DP00082     419
>DP00082     420
>DP00082     421
>DP00082     422
>DP00082     423
>DP00082     424
>DP00082     425
>DP00082     426
>DP00082     427
>DP00082     428
>DP00082     429
>DP00082     430
>DP00082     431
>DP00082     432
>DP00082     433
>DP00082     434
>DP00082     435
>DP00082     436
>DP00082     437
>DP00082     438
>DP00082     439
>DP00082     440
>DP00082     441
>DP00082     442
>DP00082     443
>DP00082     444
>DP00082     445
>DP00082     446
>DP00082     447
>DP00082     448
>DP00082     449
>DP00082     450
>DP00082     451
>DP00082     452
>DP00082     453
>DP00082     454
>DP00082     455
>DP00082     456
>DP00082     457
>DP00082     458
>DP00082     459
>DP00082     460
>DP00082     461
>DP00082     462
>DP00082     463
>DP00082     464
>DP00082     465
>DP00082     466
>DP00082     467
>DP00082     468
>DP00082     469
>DP00082     470
>DP00082     471
>DP00082     472
>DP00082     473
>DP00082     474
>DP00082     475
>DP00082     476
>DP00082     477
>DP00082     478
>DP00082     479
>DP00082     480
>DP00082     481
>DP00082     482
>DP00082     483
>DP00082     484
>DP00082     485
>DP00082     486
>DP00082     487
>DP00082     488
>DP00082     489
>DP00082     490
>DP00083     225
>DP00083     226
>DP00083     227
>DP00083     228
>DP00083     229
>DP00083     230
>DP00083     231
>DP00083     232
>DP00083     233
>DP00083     234
>DP00083     235
>DP00083     236
>DP00083     237
>DP00083     238
>DP00083     239
>DP00083     240
>DP00083     241
>DP00083     242
>DP00083     243
>DP00083     244
>DP00083     245
>DP00083     246
>DP00083     247
>DP00083     248
>DP00083     249
>DP00083     250
>DP00083     251
>DP00083     252
>DP00083     253
>DP00083     254
>DP00083     255
>DP00083     256
>DP00083     257
>DP00083     258
>DP00083     259
>DP00083     260
>DP00083     261
>DP00083     262
>DP00083     263
>DP00083     264
>DP00083     265
>DP00083     266
>DP00083     267
>DP00083     268
>DP00083     269
>DP00083     270
>DP00083     271
>DP00083     272
>DP00083     273
>DP00083     274
>DP00083     275
>DP00083     276
>DP00083     277
>DP00083     278
>DP00083     279
>DP00083     280
>DP00083     281
>DP00084     1
>DP00084     2
>DP00084     3
>DP00084     4
>DP00084     5
>DP00084     6
>DP00084     7
>DP00084     8
>DP00084     9
>DP00084     10
>DP00084     11
>DP00084     12
>DP00084     13
>DP00084     14
>DP00084     15
>DP00084     16
>DP00084     17
>DP00084     18
>DP00084     19
>DP00084     20
>DP00084     21
>DP00084     22
>DP00084     23
>DP00084     24
>DP00084     25
>DP00084     26
>DP00084     27
>DP00084     28
>DP00084     29
>DP00084     30
>DP00084     31
>DP00084     32
>DP00084     33
>DP00084     34
>DP00084     35
>DP00084     36
>DP00084     37
>DP00084     38
>DP00084     39
>DP00084     40
>DP00084     41
>DP00084     42
>DP00084     43
>DP00084     44
>DP00084     45
>DP00084     46
>DP00084     47
>DP00084     48
>DP00084     49
>DP00084     50
>DP00084     51
>DP00084     52
>DP00084     53
>DP00084     54
>DP00084     55
>DP00084     56
>DP00084     57
>DP00084     58
>DP00084     59
>DP00084     60
>DP00084     61
>DP00084     62
>DP00084     63
>DP00084     64
>DP00084     65
>DP00084     66
>DP00084     67
>DP00084     68
>DP00084     69
>DP00084     70
>DP00084     71
>DP00084     72
>DP00084     73
>DP00084     74
>DP00084     75
>DP00084     76
>DP00084     77
>DP00084     78
>DP00084     79
>DP00084     80
>DP00084     81
>DP00084     82
>DP00084     83
>DP00084     84
>DP00084     85
>DP00084     86
>DP00084     87
>DP00084     88
>DP00084     89
>DP00084     90
>DP00084     91
>DP00084     92
>DP00084     93
>DP00084     94
>DP00084     95
>DP00084     96
>DP00084     97
>DP00084     98
>DP00084     99
>DP00084     100
>DP00084     101
>DP00084     102
>DP00084     103
>DP00084     104
>DP00084     105
>DP00084     106
>DP00084     107
>DP00084     108
>DP00084     109
>DP00084     110
>DP00085     429
>DP00085     430
>DP00085     431
>DP00085     432
>DP00085     433
>DP00085     434
>DP00085     435
>DP00085     436
>DP00085     437
>DP00085     438
>DP00085     439
>DP00085     440
>DP00085     441
>DP00085     442
>DP00085     443
>DP00085     444
>DP00085     445
>DP00085     446
>DP00085     447
>DP00085     448
>DP00085     449
>DP00085     450
>DP00085     451
>DP00085     452
>DP00085     453
>DP00085     454
>DP00085     455
>DP00085     456
>DP00085     457
>DP00085     458
>DP00085     459
>DP00085     460
>DP00085     461
>DP00085     462
>DP00085     463
>DP00085     464
>DP00085     465
>DP00085     466
>DP00085     467
>DP00085     468
>DP00085     469
>DP00085     470
>DP00085     471
>DP00085     472
>DP00085     473
>DP00085     474
>DP00085     475
>DP00085     476
>DP00085     477
>DP00085     478
>DP00085     479
>DP00085     480
>DP00085     481
>DP00085     482
>DP00085     483
>DP00085     484
>DP00085     485
>DP00085     486
>DP00085     487
>DP00085     488
>DP00085     489
>DP00085     490
>DP00085     491
>DP00085     492
>DP00085     493
>DP00085     494
>DP00085     495
>DP00085     496
>DP00085     497
>DP00085     498
>DP00085     499
>DP00085     500
>DP00085     501
>DP00085     502
>DP00085     503
>DP00085     504
>DP00085     505
>DP00085     506
>DP00085     507
>DP00085     508
>DP00085     509
>DP00085     510
>DP00085     511
>DP00085     512
>DP00085     513
>DP00085     514
>DP00085     515
>DP00085     516
>DP00085     517
>DP00085     518
>DP00085     519
>DP00085     520
>DP00085     521
>DP00085     522
>DP00085     523
>DP00085     524
>DP00085     525
>DP00085     526
>DP00085     527
>DP00085     528
>DP00085     529
>DP00085     530
>DP00085     531
>DP00085     532
>DP00085     533
>DP00085     534
>DP00085     535
>DP00085     536
>DP00085     537
>DP00085     538
>DP00085     539
>DP00085     540
>DP00085     541
>DP00085     542
>DP00085     543
>DP00085     544
>DP00085     545
>DP00085     546
>DP00085     547
>DP00085     548
>DP00085     549
>DP00085     550
>DP00085     551
>DP00086     1
>DP00086     2
>DP00086     3
>DP00086     4
>DP00086     5
>DP00086     6
>DP00086     7
>DP00086     8
>DP00086     9
>DP00086     10
>DP00086     11
>DP00086     12
>DP00086     13
>DP00086     14
>DP00086     15
>DP00086     16
>DP00086     17
>DP00086     18
>DP00086     19
>DP00086     20
>DP00086     21
>DP00086     22
>DP00086     23
>DP00086     24
>DP00086     25
>DP00086     26
>DP00086     27
>DP00086     28
>DP00086     29
>DP00086     30
>DP00086     31
>DP00086     32
>DP00086     33
>DP00086     34
>DP00086     35
>DP00086     36
>DP00086     37
>DP00086     38
>DP00086     39
>DP00086     40
>DP00086     41
>DP00086     42
>DP00086     43
>DP00086     44
>DP00086     45
>DP00086     46
>DP00086     47
>DP00086     48
>DP00086     49
>DP00086     50
>DP00086     51
>DP00086     52
>DP00086     53
>DP00086     54
>DP00086     55
>DP00086     56
>DP00086     57
>DP00086     58
>DP00086     59
>DP00086     60
>DP00086     61
>DP00086     62
>DP00086     63
>DP00086     64
>DP00086     65
>DP00086     66
>DP00086     67
>DP00086     68
>DP00086     69
>DP00086     70
>DP00086     71
>DP00086     72
>DP00086     73
>DP00086     183
>DP00086     184
>DP00086     185
>DP00086     186
>DP00086     187
>DP00086     188
>DP00086     200
>DP00086     224
>DP00086     225
>DP00086     226
>DP00086     227
>DP00086     291
>DP00086     292
>DP00086     293
>DP00086     294
>DP00086     295
>DP00086     296
>DP00086     297
>DP00086     298
>DP00086     299
>DP00086     300
>DP00086     301
>DP00086     302
>DP00086     303
>DP00086     304
>DP00086     305
>DP00086     306
>DP00086     307
>DP00086     308
>DP00086     309
>DP00086     310
>DP00086     311
>DP00086     312
>DP00086     319
>DP00086     320
>DP00086     321
>DP00086     322
>DP00086     323
>DP00086     357
>DP00086     358
>DP00086     359
>DP00086     360
>DP00087     350
>DP00087     351
>DP00087     352
>DP00087     353
>DP00087     354
>DP00087     355
>DP00087     356
>DP00087     357
>DP00087     358
>DP00087     359
>DP00087     360
>DP00087     361
>DP00087     362
>DP00087     363
>DP00087     364
>DP00087     365
>DP00087     366
>DP00087     367
>DP00087     368
>DP00087     369
>DP00087     370
>DP00087     371
>DP00087     372
>DP00087     373
>DP00087     374
>DP00087     375
>DP00087     376
>DP00087     377
>DP00087     378
>DP00087     379
>DP00087     380
>DP00087     381
>DP00087     382
>DP00087     383
>DP00087     384
>DP00087     385
>DP00087     386
>DP00087     387
>DP00087     388
>DP00087     389
>DP00087     390
>DP00087     391
>DP00087     392
>DP00087     393
>DP00087     394
>DP00087     403
>DP00087     404
>DP00087     405
>DP00087     406
>DP00087     407
>DP00087     408
>DP00087     409
>DP00087     410
>DP00087     411
>DP00087     412
>DP00087     413
>DP00087     414
>DP00087     415
>DP00087     416
>DP00087     417
>DP00087     418
>DP00087     419
>DP00087     420
>DP00087     421
>DP00087     422
>DP00087     423
>DP00087     424
>DP00087     425
>DP00087     426
>DP00087     427
>DP00087     428
>DP00087     429
>DP00087     430
>DP00087     431
>DP00087     432
>DP00087     433
>DP00087     434
>DP00087     435
>DP00087     436
>DP00087     437
>DP00087     438
>DP00087     439
>DP00087     440
>DP00087     441
>DP00087     442
>DP00087     443
>DP00087     444
>DP00087     445
>DP00087     446
>DP00087     447
>DP00087     448
>DP00087     449
>DP00087     450
>DP00087     451
>DP00087     452
>DP00087     453
>DP00087     454
>DP00087     455
>DP00087     456
>DP00087     457
>DP00087     458
>DP00087     459
>DP00087     460
>DP00087     461
>DP00087     462
>DP00087     463
>DP00087     464
>DP00087     465
>DP00087     466
>DP00087     467
>DP00087     468
>DP00087     469
>DP00087     470
>DP00087     471
>DP00087     472
>DP00087     473
>DP00087     474
>DP00087     475
>DP00087     476
>DP00087     477
>DP00087     478
>DP00087     479
>DP00087     480
>DP00087     481
>DP00087     482
>DP00087     483
>DP00087     484
>DP00087     485
>DP00087     486
>DP00087     487
>DP00087     488
>DP00087     489
>DP00087     490
>DP00088     1
>DP00088     2
>DP00088     3
>DP00088     4
>DP00088     5
>DP00088     6
>DP00088     7
>DP00088     8
>DP00088     9
>DP00088     10
>DP00088     11
>DP00088     12
>DP00088     13
>DP00088     14
>DP00088     15
>DP00088     16
>DP00088     17
>DP00088     18
>DP00088     19
>DP00088     20
>DP00088     21
>DP00088     22
>DP00088     23
>DP00088     24
>DP00088     25
>DP00088     26
>DP00088     27
>DP00088     28
>DP00088     29
>DP00088     30
>DP00088     31
>DP00088     32
>DP00088     33
>DP00088     34
>DP00088     35
>DP00088     36
>DP00088     37
>DP00088     38
>DP00088     39
>DP00088     40
>DP00088     41
>DP00088     42
>DP00088     43
>DP00088     44
>DP00088     45
>DP00088     46
>DP00088     47
>DP00088     48
>DP00088     49
>DP00088     50
>DP00088     51
>DP00088     82
>DP00088     83
>DP00088     84
>DP00088     85
>DP00088     86
>DP00088     87
>DP00088     88
>DP00088     89
>DP00088     90
>DP00088     91
>DP00088     92
>DP00088     93
>DP00088     94
>DP00088     95
>DP00088     180
>DP00088     181
>DP00088     182
>DP00088     183
>DP00088     184
>DP00088     185
>DP00088     521
>DP00088     522
>DP00088     523
>DP00088     524
>DP00088     525
>DP00088     526
>DP00088     527
>DP00088     528
>DP00088     529
>DP00088     530
>DP00088     531
>DP00088     532
>DP00088     533
>DP00088     534
>DP00088     535
>DP00088     536
>DP00088     537
>DP00088     538
>DP00088     539
>DP00088     540
>DP00088     553
>DP00088     554
>DP00088     555
>DP00088     556
>DP00088     557
>DP00088     558
>DP00088     559
>DP00088     560
>DP00088     561
>DP00088     562
>DP00088     563
>DP00088     564
>DP00088     565
>DP00088     566
>DP00088     567
>DP00088     568
>DP00088     569
>DP00088     570
>DP00088     571
>DP00088     572
>DP00088     573
>DP00088     574
>DP00088     575
>DP00088     576
>DP00088     577
>DP00088     578
>DP00088     579
>DP00088     580
>DP00088     581
>DP00088     582
>DP00088     583
>DP00088     584
>DP00088     585
>DP00088     586
>DP00088     587
>DP00088     588
>DP00088     589
>DP00088     590
>DP00088     591
>DP00088     592
>DP00088     593
>DP00088     594
>DP00088     595
>DP00088     596
>DP00088     597
>DP00088     598
>DP00088     599
>DP00088     600
>DP00088     601
>DP00088     602
>DP00088     603
>DP00088     604
>DP00088     605
>DP00088     606
>DP00088     607
>DP00088     608
>DP00088     609
>DP00088     610
>DP00088     611
>DP00088     612
>DP00088     613
>DP00088     614
>DP00088     615
>DP00088     616
>DP00088     617
>DP00088     618
>DP00088     619
>DP00088     620
>DP00088     621
>DP00088     622
>DP00088     623
>DP00088     624
>DP00088     625
>DP00088     626
>DP00088     627
>DP00088     628
>DP00088     629
>DP00088     630
>DP00088     631
>DP00088     632
>DP00088     633
>DP00088     634
>DP00088     635
>DP00088     636
>DP00088     637
>DP00088     638
>DP00088     639
>DP00088     640
>DP00088     641
>DP00088     642
>DP00088     643
>DP00088     644
>DP00088     645
>DP00088     646
>DP00088     647
>DP00088     648
>DP00088     649
>DP00088     650
>DP00088     651
>DP00088     652
>DP00088     653
>DP00088     654
>DP00088     655
>DP00088     656
>DP00088     657
>DP00088     658
>DP00088     659
>DP00088     660
>DP00088     661
>DP00088     662
>DP00088     663
>DP00089     1
>DP00089     2
>DP00089     3
>DP00089     4
>DP00089     5
>DP00089     6
>DP00089     7
>DP00089     8
>DP00089     9
>DP00089     10
>DP00089     11
>DP00089     12
>DP00089     13
>DP00089     14
>DP00089     15
>DP00089     16
>DP00089     17
>DP00089     18
>DP00089     19
>DP00089     20
>DP00089     21
>DP00089     22
>DP00089     23
>DP00089     24
>DP00089     25
>DP00089     26
>DP00089     283
>DP00089     284
>DP00089     285
>DP00089     286
>DP00089     287
>DP00089     288
>DP00089     289
>DP00089     290
>DP00089     291
>DP00089     292
>DP00089     293
>DP00089     294
>DP00089     295
>DP00089     296
>DP00089     297
>DP00089     298
>DP00089     299
>DP00089     300
>DP00089     301
>DP00089     302
>DP00089     303
>DP00089     304
>DP00089     305
>DP00089     306
>DP00089     307
>DP00089     308
>DP00089     309
>DP00089     310
>DP00089     311
>DP00089     312
>DP00089     313
>DP00089     314
>DP00089     315
>DP00091     1
>DP00091     2
>DP00091     3
>DP00091     4
>DP00091     5
>DP00091     6
>DP00091     7
>DP00091     8
>DP00091     9
>DP00091     10
>DP00091     11
>DP00091     12
>DP00091     13
>DP00091     14
>DP00091     15
>DP00091     16
>DP00091     17
>DP00091     18
>DP00091     19
>DP00091     20
>DP00091     21
>DP00091     22
>DP00091     23
>DP00091     24
>DP00091     25
>DP00091     26
>DP00091     27
>DP00091     28
>DP00091     29
>DP00091     30
>DP00091     31
>DP00091     32
>DP00091     33
>DP00091     34
>DP00091     35
>DP00091     36
>DP00091     37
>DP00091     38
>DP00091     39
>DP00091     40
>DP00091     41
>DP00091     42
>DP00091     43
>DP00091     44
>DP00091     45
>DP00091     46
>DP00091     47
>DP00091     48
>DP00091     49
>DP00091     50
>DP00091     51
>DP00091     52
>DP00091     53
>DP00091     54
>DP00091     55
>DP00091     56
>DP00091     57
>DP00091     58
>DP00091     59
>DP00091     60
>DP00091     61
>DP00091     62
>DP00091     63
>DP00091     64
>DP00091     65
>DP00091     66
>DP00091     67
>DP00091     68
>DP00091     69
>DP00091     70
>DP00091     71
>DP00091     72
>DP00091     73
>DP00091     74
>DP00091     75
>DP00091     76
>DP00091     77
>DP00091     78
>DP00091     79
>DP00091     80
>DP00091     81
>DP00091     82
>DP00091     83
>DP00091     84
>DP00091     181
>DP00091     182
>DP00091     183
>DP00091     184
>DP00091     185
>DP00091     186
>DP00091     187
>DP00091     188
>DP00091     189
>DP00091     190
>DP00091     191
>DP00091     192
>DP00091     193
>DP00091     194
>DP00091     195
>DP00091     196
>DP00091     197
>DP00091     198
>DP00091     199
>DP00091     200
>DP00091     201
>DP00091     202
>DP00091     203
>DP00091     204
>DP00091     205
>DP00091     206
>DP00091     207
>DP00091     208
>DP00091     209
>DP00091     210
>DP00091     211
>DP00091     212
>DP00091     213
>DP00091     214
>DP00091     215
>DP00091     216
>DP00091     217
>DP00091     218
>DP00091     219
>DP00091     220
>DP00091     221
>DP00091     222
>DP00091     223
>DP00091     224
>DP00091     225
>DP00091     226
>DP00091     227
>DP00091     228
>DP00091     229
>DP00091     230
>DP00091     231
>DP00091     232
>DP00091     233
>DP00091     234
>DP00091     235
>DP00091     236
>DP00091     237
>DP00091     238
>DP00091     239
>DP00091     240
>DP00091     241
>DP00091     242
>DP00091     243
>DP00091     244
>DP00091     245
>DP00091     246
>DP00091     247
>DP00091     248
>DP00091     249
>DP00091     250
>DP00091     251
>DP00091     252
>DP00091     253
>DP00091     254
>DP00091     255
>DP00091     256
>DP00091     257
>DP00091     258
>DP00091     259
>DP00091     260
>DP00091     261
>DP00091     262
>DP00091     263
>DP00091     264
>DP00091     265
>DP00092     1
>DP00092     2
>DP00092     3
>DP00092     4
>DP00092     5
>DP00092     6
>DP00092     7
>DP00092     8
>DP00092     9
>DP00092     10
>DP00092     11
>DP00092     12
>DP00092     13
>DP00092     374
>DP00092     375
>DP00092     376
>DP00092     377
>DP00092     378
>DP00092     379
>DP00092     380
>DP00092     381
>DP00092     382
>DP00092     383
>DP00092     384
>DP00092     385
>DP00092     386
>DP00092     387
>DP00092     388
>DP00092     389
>DP00092     390
>DP00092     391
>DP00092     392
>DP00092     393
>DP00092     394
>DP00092     395
>DP00092     396
>DP00092     397
>DP00092     398
>DP00092     399
>DP00092     400
>DP00092     401
>DP00092     402
>DP00092     403
>DP00092     404
>DP00092     405
>DP00092     406
>DP00092     407
>DP00092     408
>DP00092     409
>DP00092     410
>DP00092     411
>DP00092     412
>DP00092     413
>DP00092     414
>DP00092     415
>DP00092     416
>DP00092     417
>DP00092     418
>DP00092     419
>DP00092     420
>DP00092     421
>DP00092     422
>DP00092     423
>DP00092     424
>DP00092     425
>DP00092     426
>DP00092     427
>DP00092     428
>DP00092     429
>DP00092     430
>DP00092     431
>DP00092     432
>DP00092     433
>DP00092     434
>DP00092     435
>DP00092     436
>DP00092     437
>DP00092     438
>DP00092     439
>DP00092     440
>DP00092     441
>DP00092     442
>DP00092     443
>DP00092     444
>DP00092     445
>DP00092     446
>DP00092     447
>DP00092     448
>DP00092     449
>DP00092     450
>DP00092     451
>DP00092     452
>DP00092     453
>DP00092     454
>DP00092     455
>DP00092     456
>DP00092     457
>DP00092     458
>DP00092     459
>DP00092     460
>DP00092     461
>DP00092     462
>DP00092     463
>DP00092     464
>DP00092     465
>DP00092     466
>DP00092     467
>DP00092     468
>DP00092     469
>DP00092     470
>DP00092     471
>DP00092     472
>DP00092     473
>DP00092     474
>DP00092     475
>DP00092     476
>DP00092     477
>DP00092     478
>DP00092     479
>DP00092     480
>DP00092     481
>DP00092     482
>DP00092     483
>DP00092     484
>DP00092     485
>DP00092     486
>DP00092     487
>DP00092     488
>DP00092     489
>DP00092     490
>DP00092     491
>DP00092     492
>DP00092     493
>DP00092     494
>DP00092     495
>DP00092     496
>DP00092     497
>DP00092     498
>DP00092     499
>DP00092     500
>DP00092     501
>DP00092     502
>DP00092     503
>DP00092     504
>DP00092     505
>DP00092     506
>DP00092     507
>DP00092     508
>DP00092     509
>DP00092     510
>DP00092     511
>DP00092     512
>DP00092     513
>DP00092     514
>DP00092     515
>DP00092     516
>DP00092     517
>DP00092     518
>DP00092     519
>DP00092     520
>DP00092     521
>DP00092_A001     1
>DP00092_A001     2
>DP00092_A001     3
>DP00092_A001     4
>DP00092_A001     169
>DP00093     125
>DP00093     126
>DP00093     127
>DP00093     128
>DP00093     129
>DP00093     130
>DP00093     131
>DP00093     132
>DP00093     133
>DP00093     134
>DP00093     135
>DP00093     136
>DP00093     137
>DP00093     138
>DP00093     139
>DP00093     140
>DP00093     141
>DP00093     142
>DP00093     143
>DP00093     144
>DP00093     145
>DP00093     146
>DP00093     147
>DP00093     148
>DP00093     149
>DP00093     150
>DP00093     151
>DP00093     152
>DP00093     153
>DP00093     154
>DP00093     155
>DP00093     156
>DP00093     157
>DP00093     158
>DP00093     159
>DP00093     160
>DP00093     161
>DP00093     162
>DP00093     163
>DP00093     164
>DP00093     165
>DP00093     166
>DP00093     167
>DP00093     168
>DP00093     169
>DP00093     170
>DP00093     171
>DP00093     172
>DP00093     173
>DP00093     174
>DP00093     175
>DP00093     176
>DP00093     177
>DP00093     178
>DP00093     179
>DP00093     180
>DP00093     181
>DP00093     182
>DP00093     183
>DP00093     184
>DP00093     185
>DP00093     186
>DP00093     187
>DP00093     188
>DP00093     189
>DP00093     190
>DP00093     191
>DP00093     192
>DP00093     193
>DP00093     194
>DP00093     195
>DP00093     196
>DP00093     197
>DP00093     198
>DP00093     199
>DP00093     200
>DP00093     201
>DP00093     202
>DP00093     203
>DP00093     204
>DP00094     1
>DP00094     2
>DP00094     3
>DP00094     4
>DP00094     5
>DP00094     6
>DP00094     7
>DP00094     8
>DP00094     9
>DP00094     10
>DP00094     11
>DP00094     12
>DP00094     13
>DP00094     14
>DP00094     15
>DP00094     16
>DP00094     17
>DP00094     18
>DP00094     19
>DP00094     20
>DP00094     21
>DP00094     22
>DP00094     23
>DP00094     24
>DP00094     25
>DP00094     26
>DP00094     27
>DP00094     28
>DP00094     29
>DP00094     30
>DP00094     31
>DP00094     32
>DP00094     33
>DP00094     34
>DP00094     35
>DP00094     36
>DP00094     37
>DP00094     38
>DP00094     39
>DP00094     40
>DP00094     41
>DP00094     42
>DP00094     43
>DP00094     44
>DP00094     45
>DP00094     46
>DP00094     47
>DP00094     48
>DP00094     49
>DP00094     50
>DP00094     51
>DP00094     52
>DP00094     53
>DP00094     54
>DP00094     55
>DP00094     56
>DP00094     57
>DP00094     58
>DP00094     59
>DP00094     60
>DP00094     61
>DP00094     62
>DP00094     63
>DP00094     64
>DP00094     65
>DP00094     66
>DP00094     67
>DP00094     68
>DP00094     69
>DP00094     70
>DP00094     71
>DP00094     72
>DP00094     73
>DP00094     74
>DP00094     75
>DP00094     76
>DP00094     77
>DP00094     78
>DP00094     79
>DP00094     80
>DP00094     81
>DP00094     82
>DP00094     83
>DP00094     84
>DP00094     85
>DP00094     86
>DP00094     87
>DP00094     88
>DP00094     89
>DP00094     90
>DP00094     91
>DP00094     92
>DP00094     93
>DP00094     94
>DP00094     95
>DP00094     96
>DP00094     97
>DP00094     98
>DP00094     99
>DP00094     100
>DP00094     101
>DP00094     102
>DP00094     103
>DP00094     104
>DP00094     105
>DP00094     106
>DP00094     107
>DP00094     108
>DP00094     109
>DP00094     110
>DP00094     111
>DP00094     112
>DP00094     113
>DP00094     114
>DP00094     115
>DP00094     116
>DP00094     117
>DP00094     118
>DP00094     119
>DP00094     120
>DP00094     121
>DP00094     122
>DP00094     123
>DP00094     124
>DP00094     125
>DP00094     126
>DP00094     127
>DP00094     128
>DP00094     129
>DP00094     130
>DP00094     131
>DP00094     132
>DP00094     133
>DP00094     134
>DP00094     135
>DP00094     136
>DP00094     137
>DP00094     138
>DP00094     139
>DP00094     140
>DP00094     141
>DP00094     142
>DP00094     143
>DP00094     144
>DP00094     145
>DP00094     146
>DP00094     147
>DP00094     148
>DP00094     149
>DP00094     150
>DP00094     151
>DP00094     152
>DP00094     153
>DP00094     154
>DP00094     155
>DP00095     321
>DP00095     322
>DP00095     323
>DP00095     324
>DP00095     325
>DP00095     326
>DP00095     327
>DP00095     328
>DP00095     329
>DP00095     330
>DP00095     331
>DP00095     332
>DP00095     333
>DP00095     334
>DP00095     335
>DP00095     336
>DP00095     337
>DP00095     338
>DP00095     339
>DP00095     340
>DP00095     341
>DP00095     342
>DP00095     343
>DP00095     344
>DP00095     345
>DP00095     346
>DP00095     347
>DP00095     348
>DP00095     349
>DP00095     350
>DP00095     351
>DP00095     352
>DP00095     353
>DP00095     354
>DP00095     355
>DP00095     356
>DP00095     357
>DP00095     358
>DP00095     359
>DP00095     360
>DP00095     361
>DP00095     362
>DP00095     363
>DP00095     364
>DP00095     365
>DP00095     366
>DP00095     367
>DP00095     368
>DP00095     369
>DP00095     370
>DP00095     371
>DP00095     372
>DP00095     373
>DP00095     374
>DP00095     375
>DP00095     376
>DP00095     377
>DP00095     378
>DP00095     379
>DP00095     380
>DP00095     381
>DP00095     382
>DP00095     383
>DP00095     384
>DP00095     385
>DP00095     386
>DP00095     387
>DP00095     388
>DP00095     389
>DP00095     390
>DP00095     391
>DP00095     392
>DP00095     393
>DP00095     394
>DP00095     395
>DP00095     396
>DP00095     397
>DP00095     398
>DP00095     399
>DP00095     400
>DP00095     401
>DP00095     402
>DP00095     403
>DP00095     404
>DP00095     405
>DP00095     406
>DP00095     407
>DP00095     408
>DP00095     409
>DP00095     410
>DP00095     411
>DP00095     412
>DP00095     413
>DP00095     414
>DP00095     415
>DP00095     416
>DP00095     417
>DP00095     418
>DP00095     419
>DP00097     1
>DP00097     2
>DP00097     3
>DP00097     4
>DP00097     5
>DP00097     6
>DP00097     7
>DP00097     8
>DP00097     9
>DP00097     10
>DP00097     11
>DP00097     12
>DP00097     13
>DP00097     14
>DP00097     15
>DP00097     16
>DP00097     17
>DP00097     18
>DP00097     19
>DP00097     20
>DP00097     21
>DP00097     22
>DP00097     23
>DP00097     24
>DP00097     25
>DP00097     26
>DP00097     27
>DP00097     28
>DP00097     29
>DP00097     30
>DP00097     96
>DP00097     97
>DP00097     98
>DP00097     99
>DP00097     100
>DP00097     101
>DP00097     102
>DP00097     103
>DP00097     104
>DP00097     105
>DP00097     106
>DP00097     107
>DP00097     108
>DP00097     109
>DP00097     110
>DP00097     111
>DP00097     112
>DP00097     113
>DP00097     114
>DP00097     115
>DP00097     116
>DP00097     117
>DP00097     118
>DP00097     119
>DP00097     120
>DP00097     121
>DP00097     122
>DP00097     123
>DP00097     124
>DP00097     125
>DP00097     126
>DP00097     127
>DP00097     128
>DP00097     129
>DP00097     130
>DP00097     131
>DP00097     132
>DP00097     133
>DP00097     134
>DP00097     135
>DP00097     136
>DP00097     137
>DP00097     138
>DP00097     139
>DP00097     140
>DP00097     141
>DP00097     142
>DP00097     143
>DP00097     144
>DP00097     145
>DP00097     146
>DP00097     147
>DP00097     148
>DP00097     149
>DP00097     150
>DP00097     151
>DP00097     152
>DP00097     153
>DP00097     154
>DP00097     155
>DP00097     156
>DP00097     157
>DP00097     158
>DP00097     159
>DP00097     160
>DP00097     161
>DP00097     162
>DP00097     163
>DP00097     164
>DP00097     165
>DP00097     166
>DP00097     167
>DP00097     168
>DP00097     169
>DP00097     170
>DP00097     171
>DP00097     172
>DP00097     173
>DP00097     174
>DP00097     175
>DP00097     176
>DP00097     177
>DP00097     178
>DP00097     179
>DP00097     180
>DP00097     181
>DP00097     182
>DP00097     183
>DP00097     184
>DP00097     185
>DP00097     186
>DP00097     187
>DP00097     188
>DP00097     189
>DP00097     190
>DP00097     191
>DP00097     192
>DP00097     193
>DP00098     151
>DP00098     152
>DP00098     153
>DP00098     154
>DP00098     155
>DP00098     156
>DP00098     157
>DP00098     158
>DP00098     159
>DP00098     160
>DP00098     161
>DP00098     162
>DP00098     163
>DP00098     164
>DP00098     165
>DP00098     166
>DP00098     167
>DP00098     168
>DP00099     38
>DP00099     39
>DP00099     40
>DP00099     41
>DP00099     42
>DP00099     43
>DP00099     44
>DP00099     45
>DP00099     46
>DP00099     47
>DP00099     48
>DP00099     49
>DP00099     50
>DP00099     51
>DP00099     52
>DP00099     53
>DP00099     54
>DP00099     55
>DP00099     56
>DP00099     57
>DP00099     58
>DP00099     59
>DP00099     60
>DP00099     61
>DP00099     62
>DP00099     63
>DP00100     176
>DP00100     177
>DP00100     178
>DP00100     179
>DP00100     180
>DP00100     181
>DP00100     182
>DP00100     183
>DP00100     184
>DP00100     185
>DP00100     186
>DP00100     187
>DP00100     188
>DP00100     189
>DP00100     190
>DP00100     191
>DP00100     192
>DP00100     193
>DP00100     194
>DP00100     195
>DP00100     196
>DP00100     197
>DP00100     198
>DP00100     199
>DP00100     200
>DP00100     201
>DP00100     202
>DP00100     203
>DP00100     204
>DP00100     205
>DP00100     206
>DP00100     207
>DP00100     208
>DP00100     209
>DP00100     210
>DP00100     211
>DP00101     448
>DP00101     449
>DP00101     450
>DP00101     451
>DP00101     452
>DP00101     453
>DP00101     454
>DP00101     455
>DP00101     456
>DP00101     457
>DP00101     458
>DP00101     459
>DP00101     460
>DP00101     466
>DP00101     467
>DP00101     468
>DP00101     469
>DP00101     470
>DP00101     471
>DP00101     472
>DP00101     473
>DP00101     474
>DP00101     475
>DP00101     476
>DP00101     477
>DP00101     478
>DP00101     479
>DP00101     491
>DP00101     492
>DP00101     493
>DP00101     494
>DP00101     495
>DP00101     496
>DP00101     497
>DP00101     498
>DP00101     499
>DP00103     1
>DP00103     2
>DP00103     3
>DP00103     4
>DP00103     5
>DP00103     6
>DP00103     7
>DP00103     8
>DP00103     9
>DP00103     10
>DP00103     11
>DP00103     12
>DP00103     13
>DP00103     14
>DP00103     15
>DP00103     16
>DP00103     17
>DP00103     18
>DP00103     19
>DP00103     20
>DP00103     21
>DP00103     22
>DP00103     23
>DP00103     24
>DP00103     25
>DP00103     26
>DP00103     27
>DP00103     28
>DP00103     29
>DP00103     30
>DP00103     31
>DP00103     32
>DP00103     33
>DP00103     34
>DP00103     35
>DP00103     36
>DP00103     37
>DP00104     210
>DP00104     211
>DP00104     212
>DP00104     213
>DP00104     214
>DP00104     215
>DP00104     216
>DP00104     217
>DP00104     218
>DP00104     219
>DP00104     220
>DP00104     221
>DP00104     222
>DP00104     223
>DP00104     224
>DP00104     225
>DP00104     226
>DP00104     227
>DP00104     228
>DP00104     229
>DP00104     230
>DP00104     231
>DP00104     232
>DP00104     233
>DP00104     234
>DP00104     235
>DP00104     236
>DP00104     237
>DP00104     238
>DP00104     239
>DP00104     240
>DP00107     341
>DP00107     342
>DP00107     343
>DP00107     344
>DP00107     345
>DP00107     346
>DP00107     347
>DP00107     348
>DP00107     349
>DP00107     350
>DP00107     351
>DP00107     352
>DP00107     353
>DP00107     354
>DP00107     355
>DP00107     356
>DP00107     357
>DP00107     358
>DP00107     359
>DP00107     360
>DP00107     361
>DP00107     362
>DP00107     363
>DP00107     364
>DP00107     365
>DP00107     366
>DP00107     367
>DP00107     368
>DP00107     369
>DP00107     370
>DP00107     371
>DP00107     372
>DP00107     373
>DP00107     374
>DP00107     375
>DP00108     398
>DP00108     399
>DP00108     400
>DP00108     401
>DP00108     402
>DP00108     403
>DP00108     404
>DP00108     405
>DP00108     406
>DP00108     407
>DP00108     408
>DP00108     409
>DP00108     410
>DP00108     411
>DP00108     412
>DP00108     413
>DP00108     414
>DP00108     415
>DP00108     416
>DP00108     417
>DP00108     418
>DP00108     419
>DP00108     420
>DP00108     421
>DP00110     1
>DP00110     2
>DP00110     3
>DP00110     4
>DP00110     5
>DP00110     6
>DP00110     7
>DP00110     8
>DP00110     9
>DP00110     10
>DP00110     11
>DP00110     12
>DP00110     13
>DP00110     14
>DP00110     15
>DP00110     16
>DP00110     17
>DP00110     18
>DP00110     19
>DP00110     20
>DP00110     21
>DP00110     22
>DP00110     23
>DP00110     24
>DP00110     25
>DP00110     26
>DP00110     27
>DP00110     28
>DP00110     29
>DP00110     30
>DP00110     31
>DP00110     32
>DP00110     33
>DP00110     34
>DP00110     35
>DP00110     36
>DP00110     37
>DP00112     1
>DP00112     2
>DP00112     3
>DP00112     4
>DP00112     5
>DP00112     6
>DP00112     7
>DP00112     8
>DP00112     9
>DP00112     10
>DP00112     11
>DP00112     12
>DP00112     13
>DP00112     14
>DP00112     15
>DP00112     16
>DP00112     17
>DP00112     18
>DP00112     19
>DP00112     20
>DP00112     21
>DP00112     22
>DP00112     23
>DP00112     24
>DP00112     25
>DP00112     26
>DP00112     27
>DP00112     28
>DP00112     29
>DP00112     30
>DP00112     31
>DP00112     32
>DP00112     33
>DP00112     34
>DP00112     35
>DP00112     36
>DP00112     37
>DP00112     38
>DP00112     39
>DP00112     40
>DP00112     41
>DP00112     42
>DP00112     43
>DP00112     44
>DP00112     45
>DP00112     46
>DP00112     47
>DP00112     48
>DP00112     49
>DP00112     50
>DP00112     51
>DP00112     52
>DP00112     53
>DP00112     54
>DP00112     55
>DP00112     56
>DP00112     57
>DP00112     58
>DP00112     59
>DP00112     60
>DP00112     61
>DP00112     62
>DP00112     63
>DP00112     64
>DP00112     65
>DP00112     66
>DP00112     67
>DP00112     68
>DP00112     69
>DP00112     70
>DP00112     71
>DP00112     72
>DP00112     73
>DP00112     74
>DP00112     75
>DP00112     76
>DP00112     77
>DP00112     78
>DP00112     79
>DP00112     80
>DP00112     81
>DP00112     82
>DP00112     83
>DP00112     84
>DP00112     85
>DP00112     86
>DP00112     87
>DP00112     88
>DP00112     89
>DP00112     90
>DP00112     91
>DP00112     92
>DP00112     93
>DP00112     94
>DP00112     95
>DP00112     96
>DP00112     97
>DP00112     98
>DP00112     99
>DP00112     100
>DP00112     101
>DP00112     102
>DP00112     103
>DP00112     104
>DP00112     105
>DP00112     106
>DP00112     107
>DP00112     108
>DP00112     109
>DP00112     110
>DP00112     111
>DP00112     112
>DP00112     113
>DP00112     114
>DP00112     115
>DP00112     116
>DP00112     117
>DP00112     118
>DP00112     119
>DP00112     120
>DP00112     121
>DP00112     122
>DP00112     123
>DP00112     124
>DP00112     125
>DP00112     126
>DP00112     127
>DP00112     128
>DP00112     129
>DP00112     130
>DP00112     131
>DP00112     132
>DP00112     133
>DP00112     134
>DP00112     135
>DP00112     136
>DP00112     137
>DP00112     138
>DP00112     139
>DP00112     140
>DP00112     141
>DP00112     142
>DP00112     143
>DP00112     144
>DP00112     145
>DP00112     146
>DP00112     147
>DP00112     148
>DP00112     149
>DP00112     150
>DP00112     151
>DP00112     152
>DP00112     153
>DP00112     154
>DP00112     155
>DP00114     394
>DP00114     395
>DP00114     396
>DP00114     397
>DP00114     398
>DP00114     399
>DP00114     400
>DP00114     401
>DP00114     402
>DP00114     403
>DP00114     404
>DP00114     405
>DP00114     406
>DP00114     407
>DP00114     408
>DP00114     409
>DP00114     410
>DP00114     411
>DP00114     412
>DP00114     413
>DP00114     414
>DP00114     415
>DP00114     416
>DP00114     417
>DP00114     418
>DP00114     419
>DP00114     420
>DP00114     421
>DP00114     422
>DP00114     423
>DP00114     424
>DP00114     425
>DP00114     426
>DP00114     427
>DP00114     428
>DP00114     429
>DP00114     430
>DP00114     431
>DP00114     432
>DP00114     433
>DP00114     434
>DP00114     435
>DP00114     436
>DP00114     437
>DP00114     438
>DP00114     439
>DP00114     440
>DP00114     441
>DP00114     442
>DP00114     443
>DP00114     444
>DP00115     404
>DP00115     405
>DP00115     406
>DP00115     407
>DP00115     408
>DP00115     409
>DP00115     410
>DP00115     411
>DP00115     412
>DP00115     413
>DP00115     414
>DP00115     415
>DP00115     416
>DP00115     417
>DP00115     433
>DP00115     434
>DP00115     435
>DP00115     436
>DP00115     437
>DP00115     438
>DP00115     439
>DP00115     440
>DP00115     441
>DP00115     442
>DP00115     443
>DP00115     444
>DP00115     445
>DP00115     446
>DP00115     447
>DP00115     448
>DP00115     449
>DP00115     450
>DP00115     451
>DP00116     1
>DP00116     2
>DP00116     3
>DP00116     4
>DP00116     5
>DP00116     6
>DP00116     7
>DP00116     8
>DP00116     9
>DP00116     10
>DP00116     11
>DP00116     12
>DP00116     13
>DP00116     14
>DP00116     15
>DP00116     16
>DP00116     17
>DP00116     18
>DP00116     19
>DP00116     20
>DP00116     21
>DP00116     22
>DP00116     23
>DP00116     24
>DP00116     25
>DP00116     26
>DP00116     27
>DP00116     28
>DP00116     29
>DP00116     30
>DP00116     31
>DP00116     32
>DP00116     33
>DP00116     34
>DP00116     35
>DP00116     36
>DP00116     37
>DP00116     38
>DP00116     39
>DP00116     40
>DP00116     41
>DP00116     42
>DP00116     43
>DP00116     44
>DP00116     45
>DP00116     46
>DP00116     47
>DP00116     48
>DP00116     49
>DP00118     407
>DP00118     408
>DP00118     409
>DP00118     410
>DP00118     411
>DP00118     412
>DP00118     413
>DP00118     414
>DP00118     415
>DP00118     416
>DP00118     417
>DP00118     418
>DP00118     419
>DP00118     420
>DP00118     421
>DP00118     422
>DP00118     423
>DP00118     424
>DP00118     425
>DP00118     426
>DP00118     427
>DP00118     428
>DP00118     429
>DP00118     430
>DP00118     431
>DP00121     1
>DP00121     2
>DP00121     3
>DP00121     4
>DP00121     5
>DP00121     6
>DP00121     7
>DP00121     8
>DP00121     9
>DP00121     10
>DP00121     11
>DP00121     12
>DP00121     13
>DP00121     14
>DP00121     15
>DP00121     16
>DP00121     17
>DP00121     95
>DP00121     96
>DP00121     97
>DP00121     98
>DP00121     99
>DP00121     100
>DP00121     101
>DP00121     102
>DP00121     103
>DP00121     104
>DP00121     105
>DP00121     106
>DP00121     107
>DP00121     108
>DP00121     109
>DP00121     110
>DP00121     111
>DP00121     112
>DP00121     113
>DP00121     114
>DP00121     115
>DP00121     116
>DP00121     117
>DP00121     118
>DP00121     119
>DP00121     120
>DP00121     121
>DP00121     122
>DP00121     123
>DP00121     124
>DP00121     125
>DP00121     126
>DP00121     127
>DP00121     128
>DP00121     129
>DP00121     130
>DP00121     131
>DP00121     132
>DP00121     133
>DP00121     134
>DP00121     135
>DP00121     136
>DP00121     137
>DP00121     138
>DP00121     139
>DP00121     140
>DP00121     141
>DP00121     142
>DP00121     143
>DP00121     144
>DP00121     145
>DP00121     146
>DP00121     147
>DP00121     148
>DP00121     149
>DP00121     150
>DP00121     151
>DP00121     152
>DP00121     153
>DP00121     154
>DP00121     155
>DP00123     421
>DP00123     422
>DP00123     423
>DP00123     424
>DP00123     425
>DP00123     426
>DP00123     427
>DP00123     428
>DP00123     429
>DP00123     430
>DP00123     431
>DP00123     432
>DP00123     433
>DP00123     434
>DP00123     435
>DP00123     436
>DP00123     437
>DP00123     438
>DP00123     439
>DP00123     440
>DP00123     441
>DP00123     442
>DP00123     443
>DP00123     444
>DP00123     445
>DP00123     446
>DP00123     447
>DP00123     448
>DP00123     449
>DP00123     450
>DP00123     451
>DP00123     452
>DP00123     453
>DP00123     454
>DP00123     455
>DP00123     456
>DP00123     457
>DP00123     458
>DP00124     1
>DP00124     2
>DP00124     3
>DP00124     4
>DP00124     5
>DP00124     6
>DP00124     7
>DP00124     8
>DP00124     9
>DP00124     10
>DP00124     11
>DP00124     12
>DP00124     13
>DP00124     14
>DP00124     15
>DP00124     16
>DP00124     17
>DP00124     18
>DP00124     19
>DP00124     20
>DP00124     21
>DP00124     22
>DP00124     23
>DP00124     24
>DP00124     25
>DP00124     26
>DP00124     27
>DP00124     28
>DP00124     29
>DP00124     30
>DP00124     31
>DP00124     32
>DP00124     33
>DP00124     34
>DP00124     35
>DP00124     36
>DP00124     37
>DP00124     38
>DP00124     39
>DP00124     40
>DP00124     41
>DP00124     42
>DP00124     43
>DP00124     44
>DP00124     45
>DP00124     46
>DP00124     47
>DP00124     48
>DP00124     49
>DP00124     50
>DP00124     51
>DP00124     52
>DP00124     53
>DP00124     54
>DP00124     55
>DP00124     56
>DP00124     57
>DP00124     58
>DP00124     59
>DP00124     60
>DP00124     61
>DP00124     62
>DP00124     63
>DP00124     64
>DP00124     65
>DP00124     66
>DP00124     67
>DP00124     68
>DP00124     69
>DP00124     70
>DP00124     71
>DP00124     72
>DP00124     73
>DP00124     74
>DP00124     75
>DP00124     76
>DP00124     77
>DP00124     78
>DP00124     79
>DP00124     80
>DP00124     81
>DP00124     82
>DP00124     83
>DP00124     84
>DP00124     85
>DP00124     86
>DP00124     87
>DP00124     88
>DP00124     89
>DP00124     90
>DP00124     91
>DP00124     92
>DP00124     93
>DP00124     94
>DP00124     95
>DP00124     96
>DP00124     97
>DP00124     98
>DP00124     99
>DP00124     100
>DP00124     101
>DP00124     102
>DP00124     103
>DP00124     104
>DP00124     105
>DP00124     106
>DP00124     107
>DP00124     108
>DP00124     109
>DP00124     110
>DP00124     111
>DP00124     112
>DP00124     113
>DP00124     114
>DP00124     115
>DP00124     116
>DP00124     117
>DP00124     118
>DP00124     119
>DP00124     120
>DP00124     121
>DP00124     122
>DP00124     123
>DP00124     124
>DP00124     125
>DP00124     126
>DP00124     127
>DP00124     128
>DP00124     129
>DP00124     130
>DP00124     131
>DP00124     132
>DP00124     133
>DP00124     134
>DP00124     135
>DP00124     136
>DP00124     137
>DP00124     138
>DP00124     139
>DP00124     140
>DP00124     141
>DP00124     142
>DP00124     143
>DP00124     144
>DP00124     145
>DP00124     146
>DP00124     147
>DP00124     148
>DP00124     149
>DP00124     150
>DP00124     151
>DP00124     152
>DP00124     153
>DP00124     154
>DP00124     155
>DP00124     156
>DP00124     157
>DP00124     158
>DP00124     159
>DP00124     160
>DP00124     161
>DP00124     162
>DP00124     163
>DP00124     164
>DP00124     165
>DP00124     166
>DP00124     167
>DP00124     168
>DP00124     169
>DP00124     170
>DP00124     171
>DP00124     172
>DP00124     173
>DP00124     174
>DP00124     175
>DP00124     176
>DP00124     177
>DP00124     178
>DP00124     179
>DP00124     180
>DP00124     181
>DP00124     182
>DP00124     183
>DP00124     184
>DP00124     185
>DP00124     186
>DP00124     187
>DP00124     188
>DP00124     189
>DP00124     190
>DP00124     191
>DP00124     192
>DP00124     193
>DP00124     194
>DP00124     195
>DP00124     196
>DP00124     197
>DP00124     198
>DP00124     199
>DP00124     200
>DP00124     201
>DP00124     202
>DP00124     203
>DP00124     204
>DP00124     205
>DP00124     206
>DP00124     207
>DP00124     208
>DP00124     209
>DP00124     210
>DP00124     211
>DP00124     212
>DP00124     213
>DP00124     214
>DP00124     215
>DP00124     216
>DP00124     217
>DP00124     218
>DP00124     219
>DP00124     220
>DP00124     221
>DP00124     222
>DP00124     223
>DP00124     224
>DP00124     225
>DP00124     226
>DP00124     227
>DP00124     228
>DP00124     229
>DP00124     230
>DP00124     231
>DP00124     232
>DP00124     233
>DP00124     234
>DP00124     235
>DP00124     236
>DP00124     237
>DP00124     238
>DP00124     239
>DP00124     240
>DP00124     241
>DP00124     242
>DP00124     243
>DP00124     244
>DP00124     245
>DP00124     246
>DP00124     247
>DP00124     248
>DP00124     249
>DP00124     250
>DP00124     251
>DP00124     252
>DP00124     253
>DP00124     254
>DP00124     255
>DP00124     256
>DP00124     257
>DP00124     258
>DP00124     259
>DP00124     260
>DP00124     261
>DP00124     262
>DP00124     263
>DP00124     264
>DP00124     265
>DP00124     266
>DP00124     267
>DP00124     268
>DP00124     269
>DP00124     270
>DP00124     271
>DP00124     272
>DP00124     273
>DP00124     274
>DP00124     275
>DP00124     276
>DP00124     277
>DP00124     278
>DP00124     279
>DP00124     280
>DP00124     281
>DP00124     282
>DP00124     283
>DP00124     284
>DP00124     285
>DP00124     286
>DP00124     287
>DP00124     288
>DP00124     289
>DP00124     290
>DP00124     291
>DP00124     292
>DP00124     293
>DP00124     294
>DP00124     295
>DP00124     296
>DP00124     297
>DP00124     298
>DP00124     299
>DP00124     300
>DP00124     301
>DP00124     302
>DP00124     303
>DP00124     304
>DP00124     305
>DP00124     306
>DP00124     307
>DP00124     308
>DP00124     309
>DP00124     310
>DP00124     311
>DP00124     312
>DP00124     313
>DP00124     314
>DP00124     315
>DP00124     316
>DP00124     317
>DP00124     318
>DP00124     319
>DP00124     320
>DP00124     321
>DP00124     322
>DP00124     323
>DP00124     324
>DP00124     325
>DP00124     326
>DP00124     327
>DP00124     328
>DP00124     329
>DP00124     330
>DP00124     331
>DP00124     332
>DP00124     333
>DP00124     334
>DP00124     335
>DP00124     336
>DP00124     337
>DP00124     338
>DP00124     339
>DP00124     340
>DP00124     341
>DP00124     342
>DP00124     343
>DP00124     344
>DP00124     345
>DP00124     346
>DP00124     347
>DP00124     348
>DP00124     349
>DP00124     350
>DP00124     351
>DP00124     352
>DP00124     353
>DP00124     354
>DP00124     355
>DP00124     356
>DP00124     357
>DP00124     358
>DP00124     359
>DP00124     360
>DP00124     361
>DP00124     362
>DP00124     363
>DP00124     364
>DP00124     365
>DP00124     366
>DP00124     367
>DP00124     368
>DP00124     369
>DP00124     370
>DP00124     371
>DP00124     372
>DP00124     373
>DP00124     374
>DP00124     375
>DP00124     376
>DP00124     377
>DP00124     378
>DP00124     379
>DP00124     380
>DP00124     381
>DP00124     382
>DP00124     383
>DP00124     384
>DP00124     385
>DP00124     386
>DP00124     387
>DP00124     388
>DP00124     389
>DP00124     390
>DP00124     391
>DP00124     392
>DP00124     393
>DP00124     394
>DP00124     395
>DP00124     396
>DP00124     397
>DP00124     398
>DP00124     399
>DP00124     400
>DP00124     401
>DP00124     402
>DP00124     403
>DP00124     404
>DP00124     405
>DP00124     406
>DP00124     407
>DP00124     408
>DP00124     409
>DP00124     410
>DP00124     411
>DP00124     412
>DP00124     413
>DP00124     414
>DP00124     415
>DP00124     416
>DP00124     417
>DP00124     418
>DP00124     419
>DP00124     420
>DP00124     421
>DP00124     422
>DP00124     423
>DP00124     424
>DP00124     425
>DP00124     426
>DP00124     427
>DP00124     428
>DP00124     429
>DP00124     430
>DP00124     431
>DP00124     432
>DP00124     433
>DP00124     434
>DP00124     435
>DP00124     436
>DP00124     437
>DP00124     438
>DP00124     439
>DP00124     440
>DP00124     441
>DP00124     442
>DP00124     443
>DP00124     444
>DP00124     445
>DP00124     446
>DP00124     447
>DP00124     448
>DP00124     449
>DP00124     450
>DP00124     451
>DP00124     452
>DP00124     453
>DP00124     454
>DP00124     455
>DP00124     456
>DP00124     457
>DP00124     458
>DP00124     459
>DP00124     460
>DP00124     461
>DP00124     462
>DP00124     463
>DP00124     464
>DP00124     465
>DP00124     466
>DP00124     467
>DP00124     468
>DP00124     469
>DP00124     470
>DP00124     471
>DP00124     472
>DP00124     473
>DP00124     474
>DP00124     475
>DP00124     476
>DP00124     477
>DP00124     478
>DP00124     479
>DP00124     480
>DP00124     481
>DP00124     482
>DP00124     483
>DP00124     484
>DP00124     485
>DP00124     486
>DP00124     487
>DP00124     488
>DP00124     489
>DP00124     490
>DP00124     491
>DP00124     492
>DP00124     493
>DP00124     494
>DP00124     495
>DP00124     496
>DP00124     497
>DP00124     498
>DP00124     499
>DP00124     500
>DP00124     501
>DP00124     502
>DP00124     503
>DP00124     504
>DP00124     505
>DP00124     506
>DP00124     507
>DP00124     508
>DP00124     509
>DP00124     510
>DP00124     511
>DP00124     512
>DP00124     513
>DP00124     514
>DP00124     515
>DP00124     516
>DP00124     517
>DP00124     518
>DP00124     519
>DP00124     520
>DP00124     521
>DP00124     522
>DP00124     523
>DP00124     524
>DP00124     525
>DP00124     526
>DP00124     527
>DP00124     528
>DP00124     529
>DP00124     530
>DP00124     531
>DP00124     532
>DP00124     533
>DP00124     534
>DP00124     535
>DP00124     536
>DP00124     537
>DP00124     538
>DP00124     539
>DP00124     540
>DP00124     541
>DP00124     542
>DP00124     543
>DP00124     544
>DP00124     545
>DP00124     546
>DP00124     547
>DP00124     548
>DP00124     549
>DP00124     550
>DP00124     551
>DP00124     552
>DP00124     553
>DP00124     554
>DP00124     555
>DP00124     556
>DP00124     557
>DP00124     558
>DP00124     559
>DP00124     560
>DP00124     561
>DP00124     562
>DP00124     563
>DP00124     564
>DP00124     565
>DP00124     566
>DP00124     567
>DP00124     568
>DP00124     569
>DP00124     570
>DP00124     571
>DP00124     572
>DP00124     573
>DP00124     574
>DP00124     575
>DP00124     576
>DP00124     577
>DP00124     578
>DP00124     579
>DP00124     580
>DP00124     581
>DP00124     582
>DP00124     583
>DP00124     584
>DP00124     585
>DP00124     586
>DP00124     587
>DP00124     588
>DP00124     589
>DP00124     590
>DP00124     591
>DP00124     592
>DP00124     593
>DP00124     594
>DP00124     595
>DP00124     596
>DP00124     597
>DP00124     598
>DP00124     599
>DP00124     600
>DP00124     601
>DP00124     602
>DP00124     603
>DP00124     604
>DP00124     605
>DP00124     606
>DP00124     607
>DP00124     608
>DP00124     609
>DP00124     610
>DP00124     611
>DP00124     612
>DP00124     613
>DP00124     614
>DP00124     615
>DP00124     616
>DP00124     617
>DP00124     618
>DP00124     619
>DP00124     620
>DP00124     621
>DP00124     622
>DP00124     623
>DP00124     624
>DP00124     625
>DP00124     626
>DP00124     627
>DP00124     628
>DP00124     629
>DP00124     630
>DP00124     631
>DP00124     632
>DP00124     633
>DP00124     634
>DP00124     635
>DP00124     636
>DP00124     637
>DP00124     638
>DP00124     639
>DP00124     640
>DP00124     641
>DP00124     642
>DP00124     643
>DP00124     644
>DP00124     645
>DP00124     646
>DP00125     31
>DP00125     32
>DP00125     33
>DP00125     34
>DP00125     35
>DP00125     36
>DP00125     37
>DP00125     38
>DP00125     39
>DP00125     40
>DP00125     41
>DP00125     42
>DP00125     43
>DP00125     44
>DP00125     45
>DP00125     46
>DP00125     47
>DP00125     48
>DP00125     49
>DP00125     50
>DP00125     51
>DP00125     52
>DP00125     53
>DP00125     54
>DP00125     55
>DP00125     56
>DP00125     57
>DP00125     58
>DP00125     59
>DP00127     810
>DP00127     811
>DP00127     812
>DP00127     813
>DP00127     814
>DP00127     815
>DP00127     816
>DP00127     817
>DP00127     818
>DP00127     819
>DP00127     820
>DP00127     821
>DP00127     822
>DP00127     823
>DP00127     824
>DP00127     825
>DP00127     826
>DP00127     827
>DP00127     828
>DP00127     829
>DP00127     830
>DP00127     831
>DP00127     832
>DP00127     833
>DP00127     834
>DP00127     835
>DP00127     836
>DP00127     837
>DP00127     838
>DP00127     839
>DP00127     840
>DP00127     841
>DP00127     842
>DP00127     843
>DP00127     844
>DP00127     845
>DP00127     846
>DP00127     847
>DP00127     848
>DP00127     849
>DP00127     850
>DP00127     851
>DP00127     852
>DP00127     853
>DP00127     854
>DP00127     855
>DP00127     856
>DP00127     857
>DP00127     858
>DP00127     859
>DP00127     860
>DP00127     861
>DP00127     862
>DP00127     863
>DP00127     864
>DP00127     865
>DP00127     866
>DP00127     867
>DP00127     868
>DP00127     869
>DP00127     870
>DP00127     871
>DP00127     872
>DP00127     873
>DP00127     874
>DP00127     875
>DP00127     876
>DP00127     877
>DP00127     878
>DP00127     879
>DP00127     880
>DP00127     881
>DP00127     882
>DP00127     883
>DP00127     884
>DP00127     885
>DP00127     886
>DP00127     887
>DP00127     888
>DP00127     889
>DP00127     890
>DP00127     891
>DP00127     892
>DP00127     893
>DP00127     894
>DP00127     895
>DP00127     896
>DP00127     897
>DP00127     898
>DP00127     899
>DP00127     900
>DP00127     901
>DP00127     902
>DP00127     903
>DP00127     904
>DP00127     905
>DP00127     906
>DP00127     907
>DP00127     908
>DP00127     909
>DP00127     910
>DP00127     911
>DP00127     912
>DP00127     913
>DP00127     914
>DP00127     915
>DP00127     916
>DP00127     917
>DP00127     918
>DP00127     919
>DP00127     920
>DP00127     921
>DP00127     922
>DP00127     923
>DP00127     924
>DP00127     925
>DP00127     926
>DP00127     927
>DP00127     928
>DP00127     929
>DP00127     930
>DP00127     931
>DP00127     932
>DP00127     933
>DP00127     934
>DP00127     935
>DP00127     936
>DP00127     937
>DP00127     938
>DP00127     939
>DP00127     940
>DP00127     941
>DP00127     942
>DP00127     943
>DP00127     944
>DP00127     945
>DP00127     946
>DP00127     947
>DP00127     948
>DP00127     949
>DP00127     950
>DP00127     951
>DP00127     952
>DP00127     953
>DP00127     954
>DP00127     955
>DP00127     956
>DP00127     957
>DP00127     958
>DP00127     959
>DP00127     960
>DP00127     961
>DP00127     962
>DP00127     963
>DP00127     964
>DP00127     965
>DP00127     966
>DP00127     967
>DP00127     968
>DP00127     969
>DP00128     1
>DP00128     2
>DP00128     3
>DP00128     4
>DP00128     5
>DP00128     6
>DP00128     7
>DP00128     8
>DP00128     9
>DP00128     10
>DP00128     11
>DP00128     12
>DP00128     13
>DP00128     14
>DP00128     15
>DP00128     16
>DP00128     17
>DP00128     18
>DP00128     19
>DP00128     20
>DP00128     21
>DP00128     22
>DP00128     23
>DP00128     24
>DP00128     25
>DP00128     26
>DP00128     27
>DP00128     28
>DP00128     29
>DP00128     30
>DP00128     31
>DP00128     32
>DP00128     33
>DP00128     34
>DP00128     35
>DP00128     36
>DP00128     37
>DP00128     38
>DP00128     39
>DP00128     40
>DP00128     41
>DP00128     42
>DP00128     43
>DP00128     44
>DP00128     45
>DP00128     46
>DP00128     47
>DP00128     48
>DP00128     49
>DP00128     50
>DP00128     51
>DP00128     52
>DP00128     53
>DP00128     54
>DP00128     55
>DP00128     56
>DP00128     57
>DP00128     58
>DP00128     59
>DP00128     60
>DP00128     61
>DP00128     62
>DP00128     63
>DP00128     64
>DP00128     65
>DP00128     66
>DP00128     67
>DP00128     68
>DP00128     69
>DP00128     70
>DP00128     71
>DP00128     72
>DP00128     73
>DP00128     74
>DP00128     75
>DP00128     76
>DP00128     77
>DP00128     78
>DP00128     79
>DP00128     80
>DP00128     81
>DP00128     82
>DP00128     83
>DP00128     84
>DP00128     85
>DP00128     86
>DP00128     87
>DP00128     88
>DP00128     89
>DP00128     90
>DP00128     91
>DP00128     92
>DP00128     93
>DP00128     94
>DP00128     95
>DP00128     96
>DP00128     97
>DP00128     98
>DP00128     99
>DP00128     100
>DP00128     101
>DP00128     102
>DP00128     103
>DP00128     104
>DP00128     105
>DP00128     106
>DP00128     107
>DP00128     108
>DP00128     109
>DP00128     110
>DP00128     111
>DP00128     112
>DP00128     113
>DP00128     114
>DP00128     115
>DP00128     116
>DP00128     117
>DP00128     118
>DP00128     119
>DP00128     120
>DP00128     121
>DP00128     122
>DP00128     123
>DP00128     124
>DP00128     125
>DP00128     126
>DP00128     127
>DP00128     128
>DP00128     129
>DP00128     130
>DP00128     131
>DP00128     132
>DP00128     133
>DP00128     134
>DP00128     135
>DP00128     136
>DP00128     137
>DP00128     138
>DP00128     139
>DP00128     140
>DP00128     141
>DP00128     142
>DP00128     143
>DP00128     144
>DP00128     145
>DP00128     146
>DP00128     147
>DP00128     148
>DP00128     149
>DP00128     150
>DP00128     151
>DP00128     152
>DP00128     153
>DP00128     154
>DP00128     155
>DP00128     156
>DP00128     157
>DP00128     158
>DP00128     159
>DP00128     160
>DP00128     161
>DP00128     162
>DP00128     163
>DP00128     164
>DP00128     165
>DP00128     166
>DP00128     167
>DP00128     168
>DP00128     169
>DP00128     170
>DP00128     171
>DP00128     172
>DP00128     173
>DP00128     174
>DP00128     175
>DP00128     176
>DP00128     177
>DP00128     178
>DP00128     179
>DP00128     180
>DP00128     181
>DP00128     182
>DP00128     183
>DP00128     184
>DP00128     185
>DP00128     186
>DP00128     187
>DP00128     188
>DP00128     189
>DP00128     190
>DP00128     191
>DP00128     192
>DP00128     193
>DP00128     194
>DP00128     195
>DP00128     196
>DP00128     197
>DP00128     198
>DP00128     199
>DP00128     200
>DP00128     201
>DP00128     202
>DP00128     203
>DP00128     204
>DP00128     205
>DP00128     206
>DP00128     207
>DP00128     208
>DP00128     209
>DP00128     210
>DP00128     211
>DP00128     212
>DP00128     213
>DP00128     214
>DP00128     215
>DP00128     216
>DP00128     217
>DP00128     218
>DP00128     219
>DP00128     220
>DP00128     221
>DP00128     222
>DP00128     223
>DP00128     224
>DP00128     225
>DP00128     226
>DP00128     227
>DP00128     228
>DP00128     229
>DP00128     230
>DP00128     231
>DP00128     232
>DP00128     233
>DP00128     234
>DP00128     235
>DP00128     236
>DP00128     237
>DP00128     238
>DP00128     239
>DP00128     240
>DP00128     241
>DP00128     242
>DP00128     243
>DP00128     244
>DP00128     245
>DP00128     246
>DP00128     247
>DP00128     248
>DP00128     249
>DP00128     250
>DP00128     251
>DP00128     252
>DP00128     253
>DP00128     254
>DP00128     255
>DP00128     256
>DP00128     257
>DP00128     258
>DP00128     259
>DP00128     260
>DP00128     261
>DP00128     262
>DP00128     263
>DP00128     264
>DP00128     265
>DP00128     266
>DP00128     267
>DP00128     268
>DP00128     269
>DP00128     270
>DP00128     271
>DP00128     272
>DP00128     273
>DP00128     274
>DP00128     275
>DP00128     276
>DP00128     277
>DP00128     278
>DP00128     279
>DP00128     280
>DP00128     281
>DP00128     282
>DP00128     283
>DP00128     284
>DP00128     285
>DP00128     286
>DP00128     287
>DP00128     288
>DP00128     289
>DP00128     290
>DP00128     291
>DP00128     292
>DP00128     293
>DP00128     294
>DP00128     295
>DP00128     296
>DP00128     297
>DP00128     298
>DP00128     299
>DP00128     300
>DP00128     301
>DP00128     302
>DP00128     303
>DP00128     304
>DP00128     305
>DP00128     306
>DP00128     307
>DP00128     308
>DP00128     309
>DP00128     310
>DP00128     311
>DP00128     312
>DP00128     313
>DP00128     314
>DP00128     315
>DP00128     316
>DP00128     317
>DP00128     318
>DP00128     319
>DP00128     320
>DP00128     321
>DP00128     322
>DP00128     323
>DP00128     324
>DP00128     325
>DP00128     326
>DP00128     327
>DP00128     328
>DP00128     329
>DP00128     330
>DP00128     331
>DP00128     332
>DP00128     333
>DP00128     334
>DP00128     335
>DP00128     336
>DP00128     337
>DP00128     338
>DP00128     339
>DP00128     340
>DP00128     341
>DP00128     342
>DP00128     343
>DP00128     344
>DP00128     345
>DP00128     346
>DP00128     347
>DP00128     348
>DP00128     349
>DP00128     350
>DP00128     351
>DP00128     352
>DP00128     353
>DP00128     354
>DP00128     355
>DP00128     356
>DP00128     357
>DP00128     358
>DP00128     359
>DP00128     360
>DP00128     361
>DP00128     362
>DP00128     363
>DP00128     364
>DP00128     365
>DP00128     366
>DP00128     367
>DP00128     368
>DP00128     369
>DP00128     370
>DP00128     371
>DP00128     372
>DP00128     373
>DP00128     374
>DP00128     375
>DP00128     376
>DP00128     377
>DP00128     378
>DP00128     379
>DP00128     380
>DP00128     381
>DP00128     382
>DP00128     383
>DP00128     384
>DP00128     385
>DP00128     386
>DP00128     387
>DP00128     388
>DP00128     389
>DP00128     390
>DP00128     391
>DP00128     392
>DP00128     393
>DP00128     394
>DP00128     395
>DP00128     396
>DP00128     397
>DP00128     398
>DP00128     399
>DP00128     400
>DP00128     401
>DP00128     402
>DP00128     403
>DP00128     404
>DP00128     405
>DP00128     406
>DP00128     407
>DP00128     408
>DP00128     409
>DP00128     410
>DP00128     411
>DP00128     412
>DP00128     413
>DP00128     414
>DP00128     415
>DP00128     416
>DP00128     417
>DP00128     418
>DP00128     419
>DP00128     420
>DP00128     421
>DP00128     422
>DP00128     423
>DP00128     424
>DP00128     425
>DP00128     426
>DP00128     427
>DP00128     428
>DP00128     429
>DP00128     430
>DP00128     431
>DP00128     432
>DP00128     433
>DP00128     434
>DP00128     435
>DP00128     436
>DP00128     437
>DP00128     438
>DP00128     439
>DP00128     440
>DP00128     441
>DP00128     442
>DP00128     443
>DP00128     444
>DP00128     445
>DP00128     446
>DP00128     447
>DP00128     448
>DP00128     449
>DP00128     450
>DP00128     451
>DP00128     452
>DP00128     453
>DP00128     454
>DP00128     455
>DP00128     456
>DP00128     457
>DP00128     458
>DP00128     459
>DP00128     460
>DP00128     461
>DP00128     462
>DP00128     463
>DP00128     464
>DP00128     465
>DP00128     466
>DP00128     467
>DP00128     468
>DP00128     469
>DP00128     470
>DP00128     471
>DP00128     472
>DP00128     473
>DP00128     474
>DP00128     475
>DP00128     476
>DP00128     477
>DP00128     478
>DP00128     479
>DP00128     480
>DP00128     481
>DP00128     482
>DP00128     483
>DP00128     484
>DP00128     485
>DP00128     486
>DP00128     487
>DP00128     488
>DP00128     489
>DP00128     490
>DP00128     491
>DP00128     492
>DP00128     493
>DP00128     494
>DP00128     495
>DP00128     496
>DP00128     497
>DP00128     498
>DP00128     499
>DP00128     500
>DP00128     501
>DP00128     502
>DP00128     503
>DP00128     504
>DP00128     505
>DP00128     506
>DP00128     507
>DP00128     508
>DP00128     509
>DP00128     510
>DP00128     511
>DP00128     512
>DP00128     513
>DP00128     514
>DP00128     515
>DP00128     516
>DP00128     517
>DP00128     518
>DP00128     519
>DP00128     520
>DP00128     521
>DP00128     522
>DP00128     523
>DP00128     524
>DP00128     525
>DP00128     526
>DP00128     527
>DP00128     528
>DP00128     529
>DP00128     530
>DP00128     531
>DP00128     532
>DP00128     533
>DP00128     534
>DP00128     535
>DP00128     536
>DP00128     537
>DP00128     538
>DP00128     539
>DP00128     540
>DP00128     541
>DP00128     542
>DP00128     543
>DP00128     544
>DP00128     545
>DP00128     546
>DP00128     547
>DP00128     548
>DP00128     549
>DP00128     550
>DP00128     551
>DP00128     552
>DP00128     553
>DP00128     554
>DP00128     555
>DP00128     556
>DP00128     557
>DP00128     558
>DP00128     559
>DP00128     560
>DP00128     561
>DP00128     562
>DP00128     563
>DP00128     564
>DP00128     565
>DP00128     566
>DP00128     567
>DP00128     568
>DP00128     569
>DP00128     570
>DP00128     571
>DP00128     572
>DP00128     573
>DP00128     574
>DP00128     575
>DP00128     576
>DP00128     577
>DP00128     578
>DP00128     579
>DP00128     580
>DP00128     581
>DP00128     582
>DP00128     583
>DP00128     584
>DP00128     585
>DP00128     586
>DP00128     587
>DP00128     588
>DP00128     589
>DP00128     590
>DP00128     591
>DP00128     592
>DP00128     593
>DP00128     594
>DP00128     595
>DP00128     596
>DP00128     597
>DP00128     598
>DP00128     599
>DP00128     600
>DP00128     601
>DP00128     602
>DP00128     603
>DP00128     604
>DP00128     605
>DP00128     606
>DP00128     607
>DP00128     608
>DP00128     609
>DP00128     610
>DP00128     611
>DP00128     612
>DP00128     613
>DP00128     614
>DP00128     615
>DP00128     616
>DP00128     617
>DP00128     618
>DP00128     619
>DP00128     620
>DP00128     621
>DP00128     622
>DP00128     623
>DP00128     624
>DP00128     625
>DP00128     626
>DP00128     627
>DP00128     628
>DP00128     629
>DP00128     630
>DP00128     631
>DP00128     632
>DP00128     633
>DP00128     634
>DP00128     635
>DP00128     636
>DP00128     637
>DP00128     638
>DP00128     639
>DP00128     640
>DP00128     641
>DP00128     642
>DP00128     643
>DP00128     644
>DP00128     645
>DP00128     646
>DP00128     647
>DP00128     648
>DP00128     649
>DP00128     650
>DP00128     651
>DP00129     19
>DP00129     20
>DP00129     21
>DP00129     22
>DP00129     23
>DP00129     24
>DP00129     25
>DP00129     26
>DP00129     27
>DP00129     28
>DP00129     29
>DP00129     30
>DP00129     31
>DP00129     32
>DP00129     33
>DP00129     34
>DP00129     35
>DP00129     36
>DP00129     37
>DP00129     38
>DP00129     39
>DP00129     40
>DP00129     41
>DP00129     42
>DP00129     43
>DP00129     44
>DP00129     45
>DP00129     46
>DP00129     47
>DP00129     48
>DP00129     49
>DP00129     50
>DP00129     51
>DP00129     52
>DP00129     53
>DP00129     54
>DP00129     55
>DP00129     56
>DP00129     57
>DP00129     58
>DP00129     59
>DP00129     60
>DP00129     61
>DP00129     62
>DP00129     63
>DP00129     64
>DP00129     65
>DP00129     66
>DP00129     67
>DP00129     68
>DP00129     69
>DP00129     70
>DP00129     71
>DP00129     72
>DP00129     73
>DP00129     74
>DP00129     75
>DP00129     76
>DP00129     77
>DP00129     78
>DP00129     79
>DP00129     80
>DP00129     81
>DP00129     82
>DP00129     83
>DP00129     84
>DP00129     85
>DP00129     86
>DP00129     87
>DP00129     88
>DP00129     89
>DP00129     90
>DP00129     91
>DP00129     92
>DP00129     93
>DP00129     94
>DP00129     95
>DP00129     96
>DP00129     97
>DP00129     98
>DP00129     99
>DP00129     100
>DP00129     101
>DP00129     102
>DP00129     103
>DP00129     104
>DP00129     105
>DP00129     106
>DP00129     107
>DP00129     108
>DP00129     109
>DP00129     110
>DP00129     111
>DP00129     112
>DP00129     113
>DP00129     114
>DP00129     115
>DP00129     116
>DP00129     117
>DP00129     118
>DP00129     119
>DP00129     120
>DP00129     121
>DP00129     122
>DP00129     123
>DP00129     124
>DP00129     125
>DP00129     126
>DP00129     127
>DP00129     128
>DP00129     129
>DP00129     130
>DP00129     131
>DP00129     132
>DP00129     133
>DP00129     134
>DP00129     135
>DP00129     136
>DP00129     137
>DP00129     138
>DP00129     139
>DP00129     140
>DP00129     141
>DP00129     142
>DP00129     143
>DP00129     144
>DP00129     145
>DP00129     146
>DP00129     147
>DP00129     148
>DP00129     149
>DP00129     150
>DP00129     151
>DP00129     152
>DP00129     153
>DP00129     154
>DP00129     155
>DP00129     156
>DP00129     157
>DP00129     158
>DP00129     159
>DP00129     160
>DP00129     161
>DP00129     162
>DP00129     163
>DP00129     164
>DP00129     165
>DP00129     166
>DP00129     167
>DP00129     168
>DP00129     169
>DP00129     170
>DP00129     171
>DP00129     172
>DP00129     173
>DP00129     174
>DP00129     175
>DP00129     176
>DP00129     177
>DP00129     178
>DP00129     179
>DP00129     180
>DP00129     181
>DP00129     182
>DP00129     183
>DP00129     184
>DP00129     185
>DP00129     186
>DP00129     187
>DP00129     188
>DP00129     189
>DP00129     190
>DP00129     191
>DP00129     192
>DP00129     193
>DP00129     194
>DP00129     195
>DP00129     196
>DP00129     197
>DP00129     198
>DP00129     199
>DP00129     200
>DP00129     201
>DP00129     202
>DP00129     203
>DP00129     204
>DP00129     205
>DP00129     206
>DP00129     207
>DP00129     208
>DP00129     209
>DP00129     210
>DP00129     211
>DP00129     212
>DP00129     213
>DP00129     214
>DP00129     215
>DP00129     216
>DP00129     217
>DP00129     218
>DP00129     219
>DP00129     220
>DP00129     221
>DP00129     222
>DP00129     223
>DP00129     224
>DP00129     225
>DP00129     226
>DP00129     227
>DP00129     228
>DP00129     229
>DP00129     230
>DP00129     231
>DP00129     232
>DP00129     233
>DP00129     234
>DP00129     235
>DP00129     236
>DP00129     237
>DP00129     238
>DP00129     239
>DP00129     240
>DP00129     241
>DP00129     242
>DP00129     243
>DP00129     244
>DP00129     245
>DP00129     246
>DP00129     247
>DP00129     248
>DP00129     249
>DP00129     250
>DP00129     251
>DP00129     252
>DP00129     253
>DP00129     254
>DP00129     255
>DP00129     256
>DP00129     257
>DP00129     258
>DP00129     259
>DP00129     260
>DP00129     261
>DP00129     262
>DP00129     263
>DP00129     264
>DP00129     265
>DP00129     266
>DP00129     267
>DP00129     268
>DP00129     269
>DP00129     270
>DP00129     271
>DP00129     272
>DP00129     273
>DP00129     274
>DP00129     275
>DP00129     276
>DP00129     277
>DP00129     278
>DP00129     279
>DP00129     280
>DP00129     281
>DP00129     282
>DP00129     283
>DP00129     284
>DP00129     285
>DP00129     286
>DP00129     287
>DP00129     288
>DP00129     289
>DP00129     290
>DP00129     291
>DP00129     292
>DP00129     293
>DP00129     294
>DP00129     295
>DP00129     296
>DP00129     297
>DP00129     298
>DP00129     299
>DP00129     300
>DP00129     301
>DP00129     302
>DP00129     303
>DP00129     304
>DP00129     309
>DP00129     310
>DP00129     311
>DP00129     312
>DP00129     313
>DP00129     314
>DP00129     315
>DP00129     316
>DP00129     317
>DP00129     318
>DP00129     319
>DP00129     320
>DP00129     321
>DP00129     322
>DP00129     323
>DP00129     324
>DP00129     325
>DP00129     326
>DP00131     1
>DP00131     2
>DP00131     3
>DP00131     4
>DP00131     5
>DP00131     6
>DP00131     7
>DP00131     8
>DP00131     9
>DP00131     10
>DP00131     11
>DP00131     12
>DP00131     13
>DP00131     14
>DP00131     15
>DP00131     16
>DP00131     17
>DP00131     18
>DP00131     19
>DP00131     20
>DP00131     21
>DP00131     22
>DP00131     23
>DP00131     24
>DP00131     25
>DP00131     26
>DP00131     27
>DP00131     28
>DP00131     29
>DP00131     30
>DP00131     31
>DP00131     32
>DP00131     33
>DP00131     34
>DP00131     35
>DP00131     36
>DP00131     37
>DP00131     38
>DP00131     39
>DP00131     40
>DP00131     41
>DP00131     42
>DP00131     43
>DP00131     44
>DP00131     45
>DP00131     46
>DP00131     47
>DP00131     48
>DP00131     49
>DP00131     50
>DP00131     51
>DP00131     52
>DP00131     53
>DP00131     54
>DP00131     55
>DP00131     56
>DP00131     57
>DP00131     58
>DP00131     59
>DP00131     60
>DP00131     61
>DP00131     62
>DP00131     63
>DP00131     64
>DP00131     65
>DP00131     66
>DP00131     67
>DP00131     68
>DP00131     69
>DP00131     70
>DP00131     71
>DP00131     72
>DP00131     73
>DP00131     74
>DP00131     75
>DP00131     76
>DP00131     77
>DP00131     78
>DP00131     79
>DP00131     80
>DP00131     81
>DP00131     82
>DP00131     83
>DP00131     84
>DP00131     85
>DP00131     86
>DP00131     87
>DP00131     88
>DP00131     89
>DP00131     90
>DP00131     91
>DP00131     92
>DP00132     1
>DP00132     2
>DP00132     3
>DP00132     4
>DP00132     5
>DP00132     6
>DP00132     7
>DP00132     8
>DP00132     9
>DP00132     10
>DP00132     11
>DP00132     12
>DP00132     13
>DP00132     14
>DP00132     15
>DP00132     16
>DP00132     17
>DP00132     18
>DP00132     19
>DP00132     20
>DP00132     21
>DP00132     22
>DP00132     23
>DP00132     24
>DP00132     25
>DP00132     26
>DP00132     27
>DP00132     28
>DP00132     29
>DP00132     30
>DP00132     31
>DP00132     32
>DP00132     33
>DP00132     34
>DP00132     35
>DP00132     36
>DP00132     37
>DP00132     38
>DP00132     39
>DP00132     40
>DP00132     41
>DP00132     42
>DP00132     43
>DP00132     44
>DP00132     45
>DP00132     46
>DP00132     47
>DP00132     48
>DP00132     49
>DP00132     50
>DP00132     51
>DP00132     52
>DP00132     53
>DP00132     54
>DP00132     55
>DP00132     56
>DP00132     57
>DP00132     58
>DP00132     59
>DP00132     60
>DP00132     61
>DP00132     62
>DP00132     63
>DP00132     64
>DP00132     65
>DP00132     66
>DP00132     67
>DP00132     68
>DP00132     69
>DP00132     70
>DP00132     71
>DP00132     72
>DP00132     73
>DP00132     74
>DP00132     75
>DP00132     76
>DP00132     77
>DP00132     78
>DP00132     79
>DP00132     80
>DP00132     81
>DP00132     82
>DP00132     83
>DP00132     84
>DP00132     85
>DP00132     86
>DP00132     87
>DP00132     88
>DP00132     89
>DP00132     90
>DP00132     91
>DP00132     92
>DP00132     93
>DP00132     94
>DP00132     95
>DP00132     96
>DP00132     97
>DP00132     98
>DP00132     99
>DP00132     100
>DP00132     101
>DP00132     102
>DP00132     103
>DP00132     104
>DP00132     105
>DP00132     106
>DP00132     107
>DP00132     108
>DP00132     109
>DP00132     110
>DP00132     111
>DP00132     112
>DP00132     113
>DP00132     114
>DP00132     115
>DP00132     116
>DP00132     117
>DP00132     118
>DP00132     119
>DP00132     120
>DP00132     121
>DP00132     122
>DP00132     123
>DP00132     124
>DP00132     125
>DP00132     126
>DP00132     127
>DP00132     128
>DP00132     129
>DP00132     130
>DP00132     131
>DP00132     132
>DP00132     133
>DP00132     134
>DP00132     135
>DP00132     136
>DP00132     137
>DP00132     138
>DP00132     139
>DP00132     140
>DP00132     141
>DP00132     142
>DP00132     143
>DP00132     144
>DP00132     145
>DP00132     146
>DP00132     147
>DP00132     148
>DP00132     149
>DP00132     150
>DP00132     151
>DP00132     152
>DP00132     153
>DP00132     154
>DP00132     155
>DP00132     156
>DP00132     157
>DP00132     158
>DP00132     159
>DP00132     160
>DP00132     161
>DP00132     162
>DP00132     163
>DP00132     164
>DP00132     165
>DP00132     166
>DP00132     167
>DP00132     168
>DP00132     169
>DP00132     170
>DP00132     171
>DP00132     172
>DP00132     173
>DP00132     174
>DP00132     175
>DP00132     176
>DP00132     177
>DP00132     178
>DP00132     179
>DP00132     180
>DP00132     181
>DP00132     182
>DP00132     183
>DP00132     184
>DP00132     185
>DP00132     186
>DP00132     187
>DP00132     188
>DP00132     189
>DP00132     190
>DP00132     191
>DP00132     192
>DP00132     193
>DP00132     194
>DP00132     195
>DP00132     196
>DP00132     197
>DP00132     198
>DP00132     199
>DP00132     200
>DP00132     201
>DP00132     202
>DP00132     203
>DP00132     204
>DP00132     205
>DP00132     206
>DP00132     207
>DP00132     208
>DP00132     209
>DP00132     210
>DP00132     211
>DP00132     212
>DP00132     213
>DP00132     214
>DP00132     215
>DP00132     216
>DP00132     217
>DP00132     218
>DP00132     219
>DP00132     220
>DP00132     221
>DP00132     222
>DP00132     223
>DP00132     224
>DP00132     225
>DP00132     226
>DP00132     227
>DP00132     228
>DP00132     229
>DP00132     230
>DP00132     231
>DP00132     232
>DP00132     233
>DP00132     234
>DP00132     235
>DP00132     236
>DP00132     237
>DP00132     238
>DP00132     239
>DP00132     240
>DP00132     241
>DP00132     242
>DP00132     243
>DP00132     244
>DP00132     245
>DP00132     246
>DP00132     247
>DP00132     248
>DP00132     249
>DP00132     250
>DP00132     251
>DP00132     252
>DP00132     253
>DP00132     254
>DP00132     255
>DP00132     256
>DP00132     257
>DP00132     258
>DP00132     259
>DP00132     260
>DP00132     261
>DP00132     262
>DP00132     263
>DP00132     264
>DP00132     265
>DP00132     266
>DP00132     267
>DP00132     268
>DP00132     269
>DP00132     270
>DP00132     271
>DP00132     272
>DP00132     273
>DP00132     274
>DP00132     275
>DP00132     276
>DP00132     277
>DP00132     278
>DP00132     279
>DP00132     280
>DP00132     281
>DP00132     282
>DP00132     283
>DP00132     284
>DP00132     285
>DP00132     286
>DP00132     287
>DP00132     288
>DP00132     289
>DP00132     290
>DP00132     291
>DP00132     292
>DP00132     293
>DP00132     294
>DP00132     295
>DP00132     296
>DP00132     297
>DP00132     298
>DP00132     299
>DP00132     300
>DP00132     301
>DP00132     302
>DP00132     303
>DP00132     304
>DP00132     305
>DP00132     306
>DP00132     307
>DP00132     308
>DP00132     309
>DP00132     310
>DP00132     311
>DP00132     312
>DP00132     313
>DP00132     314
>DP00132     315
>DP00132     316
>DP00132     317
>DP00132     318
>DP00132     319
>DP00132     320
>DP00132     321
>DP00132     322
>DP00132     323
>DP00132     324
>DP00132     325
>DP00132     326
>DP00132     327
>DP00132     328
>DP00132     329
>DP00132     330
>DP00132     331
>DP00132     332
>DP00132     333
>DP00132     334
>DP00132     335
>DP00132     336
>DP00132     337
>DP00132     338
>DP00132     339
>DP00132     340
>DP00132     341
>DP00132     342
>DP00132     343
>DP00132     344
>DP00132     345
>DP00132     346
>DP00132     347
>DP00132     348
>DP00132     349
>DP00132     350
>DP00132     351
>DP00132     352
>DP00132     353
>DP00132     354
>DP00132     355
>DP00132     356
>DP00132     357
>DP00132     358
>DP00132     359
>DP00132     360
>DP00132     361
>DP00132     362
>DP00132     363
>DP00132     364
>DP00132     365
>DP00132     366
>DP00132     367
>DP00132     368
>DP00132     369
>DP00132     370
>DP00132     371
>DP00132     372
>DP00132     373
>DP00132     374
>DP00132     375
>DP00132     376
>DP00132     377
>DP00132     378
>DP00132     379
>DP00132     380
>DP00132     381
>DP00132     382
>DP00132     383
>DP00132     384
>DP00132     385
>DP00132     386
>DP00132     387
>DP00132     388
>DP00132     389
>DP00132     390
>DP00132     391
>DP00132     392
>DP00132     393
>DP00132     394
>DP00132     395
>DP00134     281
>DP00134     282
>DP00134     283
>DP00134     284
>DP00134     285
>DP00134     286
>DP00134     287
>DP00134     288
>DP00134     289
>DP00134     290
>DP00134     291
>DP00134     292
>DP00134     293
>DP00134     294
>DP00134     295
>DP00134     296
>DP00134     297
>DP00134     298
>DP00134     299
>DP00134     300
>DP00134     301
>DP00134     302
>DP00134     303
>DP00134     304
>DP00134     305
>DP00134     306
>DP00134     307
>DP00134     308
>DP00134     309
>DP00134     310
>DP00134     311
>DP00134     312
>DP00134     313
>DP00134     314
>DP00134     315
>DP00134     316
>DP00134     317
>DP00134     318
>DP00134     319
>DP00134     320
>DP00134     321
>DP00134     322
>DP00134     323
>DP00134     324
>DP00134     325
>DP00134     326
>DP00134     327
>DP00134     328
>DP00134     329
>DP00134     330
>DP00134     331
>DP00134     332
>DP00134     333
>DP00134     334
>DP00134     335
>DP00134     336
>DP00134     337
>DP00134     338
>DP00134     339
>DP00134     340
>DP00134     341
>DP00134     342
>DP00134     343
>DP00134     344
>DP00134     345
>DP00134     346
>DP00134     347
>DP00134     348
>DP00134     349
>DP00134     350
>DP00134     351
>DP00134     352
>DP00134     353
>DP00134     354
>DP00134     355
>DP00134     356
>DP00134     357
>DP00134     358
>DP00134     359
>DP00134     360
>DP00134     361
>DP00134     362
>DP00134     363
>DP00134     364
>DP00134     365
>DP00134     366
>DP00134     367
>DP00134     368
>DP00134     369
>DP00134     370
>DP00134     371
>DP00134     372
>DP00134     373
>DP00134     374
>DP00134     375
>DP00134     376
>DP00134     377
>DP00134     378
>DP00134     379
>DP00134     380
>DP00134     381
>DP00134     382
>DP00134     383
>DP00134     384
>DP00134     385
>DP00134     386
>DP00134     387
>DP00134     388
>DP00134     389
>DP00134     390
>DP00134     391
>DP00134     392
>DP00134     393
>DP00134     394
>DP00134     395
>DP00134     396
>DP00134     397
>DP00134     398
>DP00134     399
>DP00134     400
>DP00134     401
>DP00134     402
>DP00134     403
>DP00134     404
>DP00134     405
>DP00134     406
>DP00134     407
>DP00134     408
>DP00134     409
>DP00134     410
>DP00134     411
>DP00134     412
>DP00134     413
>DP00134     414
>DP00134     415
>DP00134     416
>DP00134     417
>DP00134     418
>DP00134     419
>DP00134     420
>DP00134     421
>DP00134     422
>DP00134     516
>DP00134     517
>DP00134     518
>DP00134     519
>DP00134     520
>DP00134     521
>DP00134     522
>DP00134     523
>DP00134     524
>DP00134     525
>DP00134     526
>DP00134     527
>DP00134     528
>DP00134     529
>DP00134     530
>DP00134     531
>DP00134     532
>DP00134     533
>DP00134     534
>DP00134     535
>DP00134     536
>DP00134     537
>DP00134     538
>DP00134     539
>DP00134     540
>DP00134     541
>DP00134     542
>DP00134     543
>DP00134     544
>DP00134     545
>DP00134     546
>DP00134     547
>DP00134     548
>DP00134     549
>DP00134     550
>DP00134     551
>DP00134     552
>DP00134     553
>DP00134     554
>DP00134     555
>DP00134     556
>DP00134     557
>DP00134     558
>DP00134     559
>DP00134     560
>DP00134     561
>DP00134     562
>DP00134     563
>DP00134     564
>DP00134     565
>DP00134     566
>DP00134     567
>DP00134     568
>DP00134     569
>DP00134     570
>DP00134     571
>DP00134     572
>DP00134     573
>DP00134     574
>DP00134     575
>DP00134     576
>DP00134     577
>DP00134     578
>DP00134     579
>DP00134     580
>DP00134     581
>DP00134     582
>DP00134     583
>DP00134     584
>DP00134     585
>DP00134     586
>DP00134     587
>DP00134     588
>DP00134     589
>DP00134     590
>DP00134     591
>DP00134     592
>DP00134     593
>DP00134     594
>DP00134     595
>DP00134     596
>DP00134     597
>DP00134     598
>DP00134     599
>DP00134     600
>DP00134     601
>DP00134     602
>DP00134     603
>DP00134     604
>DP00134     605
>DP00134     606
>DP00134     607
>DP00134     608
>DP00134     609
>DP00134     610
>DP00134     611
>DP00134     612
>DP00134     613
>DP00134     614
>DP00134     615
>DP00134     616
>DP00134     617
>DP00134     618
>DP00134     619
>DP00134     620
>DP00134     621
>DP00134     622
>DP00134     623
>DP00134     624
>DP00134     625
>DP00134     626
>DP00134     627
>DP00134     628
>DP00134     629
>DP00134     630
>DP00134     631
>DP00134     632
>DP00135     1
>DP00135     2
>DP00135     3
>DP00135     4
>DP00135     5
>DP00135     6
>DP00135     7
>DP00135     8
>DP00135     9
>DP00135     10
>DP00135     11
>DP00135     12
>DP00135     13
>DP00135     14
>DP00135     15
>DP00135     16
>DP00135     17
>DP00135     18
>DP00135     19
>DP00135     20
>DP00135     21
>DP00135     22
>DP00135     23
>DP00135     24
>DP00135     25
>DP00135     26
>DP00135     27
>DP00135     28
>DP00135     29
>DP00135     30
>DP00135     31
>DP00135     32
>DP00135     33
>DP00135     34
>DP00135     35
>DP00135     36
>DP00135     37
>DP00135     38
>DP00135     39
>DP00135     40
>DP00135     41
>DP00135     42
>DP00135     43
>DP00135     44
>DP00135     45
>DP00135     46
>DP00135     47
>DP00135     48
>DP00135     49
>DP00135     50
>DP00135     51
>DP00135     52
>DP00135     53
>DP00135     54
>DP00135     55
>DP00135     56
>DP00135     57
>DP00135     58
>DP00135     59
>DP00135     60
>DP00135     61
>DP00135     62
>DP00135     63
>DP00135     64
>DP00135     65
>DP00135     66
>DP00135     67
>DP00135     68
>DP00135     69
>DP00135     70
>DP00135     71
>DP00135     72
>DP00135     73
>DP00135     74
>DP00135     75
>DP00135     76
>DP00135     77
>DP00135     78
>DP00135     79
>DP00135     80
>DP00135     81
>DP00135     82
>DP00135     83
>DP00135     84
>DP00135     85
>DP00135     86
>DP00135     87
>DP00135     88
>DP00135     89
>DP00135     90
>DP00135     91
>DP00135     92
>DP00135     93
>DP00135     94
>DP00135     95
>DP00135     96
>DP00135     97
>DP00135     98
>DP00135     99
>DP00135     100
>DP00135     101
>DP00135     102
>DP00135     103
>DP00135     104
>DP00135     105
>DP00135     106
>DP00135     107
>DP00135     108
>DP00135     109
>DP00135     110
>DP00135     111
>DP00135     112
>DP00135     113
>DP00135     114
>DP00135     115
>DP00135     116
>DP00135     117
>DP00135     118
>DP00135     119
>DP00135     120
>DP00135     121
>DP00135     122
>DP00135     123
>DP00135     124
>DP00135     125
>DP00135     126
>DP00135     127
>DP00135     128
>DP00135     129
>DP00135     130
>DP00135     131
>DP00135     132
>DP00135     133
>DP00135     134
>DP00135     135
>DP00135     136
>DP00135     137
>DP00135     138
>DP00135     139
>DP00135     140
>DP00135     141
>DP00135     142
>DP00135     143
>DP00135     144
>DP00135     145
>DP00135     146
>DP00135     147
>DP00135     148
>DP00135     149
>DP00135     150
>DP00135     151
>DP00135     152
>DP00135     153
>DP00135     154
>DP00135     155
>DP00135     156
>DP00135     157
>DP00135     158
>DP00135     159
>DP00135     160
>DP00135     161
>DP00135     162
>DP00135     163
>DP00135     164
>DP00135     165
>DP00135     166
>DP00135     167
>DP00136     1
>DP00136     2
>DP00136     3
>DP00136     4
>DP00136     5
>DP00136     6
>DP00136     7
>DP00136     8
>DP00136     9
>DP00136     10
>DP00136     11
>DP00136     12
>DP00136     13
>DP00136     14
>DP00136     15
>DP00136     16
>DP00136     17
>DP00136     18
>DP00136     19
>DP00136     20
>DP00136     21
>DP00136     22
>DP00136     23
>DP00136     24
>DP00136     25
>DP00136     26
>DP00136     27
>DP00136     28
>DP00136     29
>DP00136     30
>DP00136     31
>DP00136     32
>DP00136     33
>DP00136     34
>DP00136     35
>DP00136     36
>DP00136     37
>DP00136     38
>DP00136     39
>DP00136     40
>DP00136     41
>DP00136     42
>DP00136     43
>DP00136     44
>DP00136     45
>DP00136     46
>DP00136     47
>DP00136     48
>DP00136     49
>DP00136     50
>DP00136     51
>DP00136     52
>DP00136     53
>DP00136     54
>DP00136     55
>DP00136     56
>DP00136     57
>DP00136     58
>DP00136     59
>DP00136     60
>DP00136     61
>DP00136     62
>DP00136     63
>DP00136     64
>DP00136     65
>DP00136     66
>DP00136     67
>DP00136     68
>DP00136     69
>DP00136     70
>DP00136     71
>DP00136     72
>DP00136     73
>DP00136     74
>DP00136     75
>DP00136     76
>DP00136     77
>DP00136     78
>DP00136     79
>DP00136     80
>DP00136     81
>DP00136     82
>DP00136     83
>DP00136     84
>DP00136     85
>DP00136     86
>DP00136     87
>DP00136     88
>DP00136     89
>DP00136     90
>DP00136     91
>DP00136     92
>DP00136     93
>DP00136     94
>DP00136     95
>DP00136     96
>DP00136     97
>DP00136     98
>DP00136     99
>DP00136     100
>DP00136     101
>DP00136     102
>DP00136     103
>DP00136     104
>DP00136     105
>DP00136     106
>DP00136     107
>DP00136     108
>DP00136     109
>DP00136     110
>DP00136     111
>DP00136     112
>DP00136     113
>DP00136     114
>DP00136     115
>DP00136     116
>DP00136     117
>DP00136     118
>DP00136     119
>DP00136     120
>DP00136     121
>DP00136     122
>DP00136     123
>DP00136     124
>DP00136     125
>DP00136     126
>DP00136     127
>DP00136     128
>DP00136     129
>DP00136     130
>DP00136     131
>DP00136     132
>DP00136     133
>DP00136     134
>DP00136     135
>DP00136     136
>DP00136     137
>DP00136     138
>DP00136     139
>DP00136     140
>DP00136     141
>DP00136     142
>DP00136     143
>DP00136     144
>DP00136     145
>DP00136     146
>DP00136     147
>DP00136     148
>DP00136     149
>DP00136     150
>DP00136     151
>DP00136     152
>DP00136     153
>DP00136     154
>DP00136     155
>DP00136     156
>DP00136     157
>DP00136     158
>DP00136     159
>DP00136     160
>DP00136     161
>DP00136     162
>DP00136     163
>DP00136     164
>DP00136     165
>DP00136     166
>DP00136     167
>DP00136     168
>DP00136     169
>DP00136     170
>DP00136     171
>DP00136     172
>DP00136     173
>DP00136     174
>DP00136     175
>DP00136     176
>DP00136     177
>DP00136     178
>DP00136     179
>DP00136     180
>DP00136     181
>DP00136     182
>DP00136     183
>DP00136     184
>DP00136     185
>DP00136     186
>DP00136     187
>DP00136     188
>DP00136     189
>DP00136     190
>DP00136     191
>DP00136     192
>DP00136     193
>DP00136     194
>DP00136     195
>DP00136     196
>DP00136     197
>DP00136     198
>DP00136     199
>DP00136     200
>DP00136     201
>DP00136     202
>DP00136     203
>DP00136     204
>DP00136     205
>DP00136     206
>DP00136     207
>DP00136     208
>DP00136     209
>DP00136     210
>DP00136     211
>DP00136     212
>DP00136     213
>DP00136     214
>DP00136     215
>DP00136     216
>DP00136     217
>DP00138     1
>DP00138     2
>DP00138     3
>DP00138     4
>DP00138     9
>DP00138     10
>DP00138     11
>DP00138     12
>DP00138     13
>DP00138     14
>DP00138     15
>DP00138     28
>DP00138     29
>DP00138     30
>DP00138     31
>DP00138     32
>DP00138     33
>DP00138     34
>DP00139     1
>DP00139     2
>DP00139     3
>DP00139     4
>DP00139     5
>DP00139     6
>DP00139     7
>DP00139     8
>DP00139     9
>DP00139     10
>DP00139     11
>DP00139     12
>DP00139     13
>DP00139     14
>DP00139     15
>DP00139     16
>DP00139     17
>DP00139     18
>DP00139     19
>DP00139     20
>DP00139     21
>DP00139     22
>DP00139     23
>DP00139     24
>DP00139     25
>DP00139     26
>DP00139     27
>DP00139     28
>DP00139     29
>DP00139     30
>DP00139     31
>DP00139     32
>DP00139     33
>DP00139     34
>DP00139     35
>DP00139     36
>DP00139     37
>DP00139     38
>DP00139     39
>DP00139     40
>DP00139     41
>DP00139     42
>DP00139     43
>DP00139     44
>DP00139     45
>DP00139     46
>DP00139     47
>DP00139     48
>DP00139     49
>DP00139     50
>DP00139     51
>DP00139     52
>DP00139     53
>DP00139     54
>DP00139     55
>DP00139     56
>DP00139     57
>DP00139     58
>DP00139     59
>DP00139     60
>DP00139     61
>DP00139     62
>DP00139     63
>DP00139     64
>DP00139     65
>DP00139     66
>DP00139     67
>DP00139     68
>DP00139     69
>DP00139     70
>DP00139     71
>DP00139     72
>DP00139     73
>DP00139     74
>DP00139     75
>DP00139     76
>DP00139     77
>DP00139     78
>DP00139     79
>DP00139     80
>DP00139     81
>DP00139     82
>DP00139     83
>DP00139     84
>DP00139     85
>DP00139     86
>DP00139     87
>DP00139     88
>DP00139     89
>DP00139     90
>DP00139     91
>DP00139     92
>DP00139     93
>DP00139     94
>DP00139     95
>DP00139     96
>DP00139     97
>DP00139     98
>DP00139     99
>DP00139     100
>DP00139     101
>DP00139     102
>DP00139     103
>DP00139     104
>DP00139     105
>DP00139     106
>DP00139     107
>DP00139     108
>DP00139     109
>DP00139     110
>DP00139     111
>DP00139     112
>DP00139     113
>DP00139     114
>DP00139     115
>DP00139     116
>DP00139     117
>DP00139     118
>DP00139     119
>DP00139     120
>DP00139     121
>DP00139     122
>DP00139     123
>DP00139     124
>DP00139     125
>DP00139     126
>DP00139     127
>DP00139     128
>DP00139     129
>DP00139     130
>DP00139     131
>DP00139     132
>DP00139     133
>DP00139     134
>DP00139     135
>DP00139     136
>DP00139     137
>DP00139     138
>DP00139     139
>DP00139     140
>DP00139     141
>DP00139     142
>DP00139     143
>DP00139     144
>DP00139     145
>DP00139     146
>DP00139     147
>DP00139     148
>DP00139     149
>DP00139     150
>DP00139     151
>DP00139     152
>DP00139     153
>DP00139     154
>DP00139     155
>DP00139     156
>DP00139     157
>DP00139     158
>DP00139     159
>DP00139     160
>DP00139     161
>DP00139     162
>DP00139     163
>DP00139     164
>DP00139     165
>DP00139     166
>DP00139     167
>DP00139     168
>DP00139     169
>DP00139     170
>DP00139     171
>DP00139     172
>DP00139     173
>DP00139     174
>DP00139     175
>DP00139     176
>DP00139     177
>DP00139     178
>DP00139     179
>DP00139     180
>DP00139     181
>DP00139     182
>DP00139     183
>DP00139     184
>DP00139     185
>DP00139     186
>DP00139     187
>DP00139     188
>DP00139     189
>DP00139     190
>DP00139     191
>DP00139     192
>DP00139     193
>DP00139     194
>DP00139     195
>DP00139     196
>DP00139     197
>DP00139     198
>DP00139     199
>DP00139     200
>DP00139     201
>DP00139     202
>DP00139     203
>DP00139     204
>DP00139     205
>DP00139     206
>DP00139     207
>DP00139     208
>DP00139     209
>DP00139     210
>DP00139     211
>DP00139     212
>DP00139     213
>DP00139     214
>DP00139     215
>DP00139     216
>DP00139     217
>DP00139     218
>DP00139     219
>DP00139     220
>DP00139     221
>DP00139     222
>DP00139     223
>DP00139     224
>DP00139     225
>DP00139     226
>DP00139     227
>DP00139     228
>DP00139     229
>DP00139     230
>DP00139     231
>DP00139     232
>DP00139     233
>DP00139     234
>DP00139     235
>DP00139     236
>DP00139     237
>DP00139     238
>DP00139     239
>DP00139     240
>DP00139     241
>DP00139     242
>DP00139     243
>DP00139     244
>DP00139     245
>DP00139     246
>DP00139     247
>DP00139     248
>DP00139     249
>DP00139     250
>DP00139     251
>DP00139     252
>DP00139     253
>DP00139     254
>DP00139     255
>DP00139     256
>DP00139     257
>DP00139     258
>DP00139     259
>DP00139     260
>DP00139     261
>DP00139     262
>DP00139     263
>DP00139     264
>DP00139     265
>DP00139     266
>DP00139     267
>DP00139     268
>DP00139     269
>DP00139     270
>DP00139     271
>DP00139     272
>DP00139     273
>DP00140     1
>DP00140     2
>DP00140     3
>DP00140     4
>DP00140     5
>DP00140     6
>DP00140     7
>DP00140     8
>DP00140     9
>DP00140     10
>DP00140     11
>DP00140     12
>DP00140     13
>DP00140     14
>DP00140     15
>DP00140     16
>DP00140     17
>DP00140     18
>DP00140     19
>DP00140     20
>DP00140     21
>DP00140     22
>DP00140     23
>DP00140     24
>DP00140     25
>DP00140     26
>DP00140     27
>DP00140     28
>DP00140     29
>DP00140     30
>DP00140     31
>DP00140     32
>DP00140     33
>DP00140     34
>DP00140     35
>DP00140     36
>DP00140     37
>DP00140     38
>DP00140     39
>DP00140     40
>DP00140     41
>DP00140     42
>DP00140     43
>DP00140     44
>DP00140     45
>DP00140     46
>DP00140     47
>DP00140     48
>DP00140     49
>DP00140     50
>DP00140     51
>DP00140     52
>DP00140     53
>DP00140     54
>DP00140     55
>DP00140     56
>DP00140     57
>DP00140     58
>DP00140     59
>DP00140     60
>DP00140     61
>DP00140     62
>DP00140     63
>DP00140     64
>DP00140     65
>DP00140     66
>DP00140     67
>DP00140     68
>DP00140     69
>DP00140     70
>DP00140     71
>DP00140     72
>DP00140     73
>DP00140     74
>DP00140     75
>DP00140     76
>DP00140     77
>DP00140     78
>DP00140     79
>DP00140     80
>DP00140     81
>DP00140     82
>DP00140     83
>DP00140     84
>DP00140     85
>DP00141     765
>DP00141     766
>DP00141     767
>DP00141     768
>DP00141     769
>DP00141     770
>DP00141     771
>DP00141     772
>DP00141     773
>DP00141     774
>DP00141     775
>DP00141     776
>DP00141     777
>DP00141     778
>DP00141     779
>DP00141     780
>DP00141     781
>DP00141     782
>DP00141     783
>DP00141     784
>DP00141     785
>DP00141     786
>DP00141     787
>DP00141     788
>DP00141     789
>DP00141     790
>DP00141     791
>DP00141     792
>DP00141     793
>DP00141     794
>DP00141     795
>DP00141     796
>DP00141     797
>DP00141     798
>DP00141     799
>DP00141     800
>DP00141     801
>DP00141     802
>DP00141     803
>DP00141     804
>DP00141     805
>DP00141     806
>DP00141     807
>DP00141     808
>DP00141     809
>DP00141     810
>DP00141     811
>DP00141     812
>DP00141     813
>DP00141     814
>DP00141     815
>DP00141     816
>DP00141     817
>DP00141     818
>DP00141     819
>DP00141     820
>DP00141     821
>DP00141     822
>DP00141     823
>DP00141     824
>DP00141     825
>DP00141     826
>DP00141     827
>DP00141     828
>DP00141     829
>DP00141     830
>DP00141     831
>DP00141     832
>DP00141     833
>DP00141     834
>DP00141     835
>DP00141     836
>DP00141     837
>DP00141     838
>DP00141     839
>DP00141     840
>DP00141     841
>DP00141     842
>DP00141     843
>DP00141     844
>DP00141     845
>DP00141     846
>DP00141     847
>DP00141     848
>DP00141     849
>DP00141     850
>DP00141     851
>DP00141     852
>DP00141     853
>DP00142     192
>DP00142     193
>DP00142     194
>DP00142     195
>DP00142     196
>DP00142     197
>DP00142     198
>DP00142     199
>DP00142     200
>DP00142     201
>DP00142     202
>DP00142     203
>DP00142     204
>DP00142     205
>DP00142     206
>DP00142     207
>DP00142     208
>DP00142     209
>DP00143     1
>DP00143     2
>DP00143     3
>DP00143     4
>DP00143     5
>DP00143     6
>DP00143     7
>DP00143     8
>DP00143     9
>DP00143     10
>DP00143     11
>DP00143     12
>DP00143     13
>DP00143     14
>DP00143     15
>DP00143     16
>DP00143     17
>DP00143     18
>DP00143     19
>DP00143     20
>DP00143     21
>DP00143     22
>DP00143     23
>DP00143     24
>DP00143     25
>DP00143     26
>DP00143     27
>DP00143     28
>DP00143     29
>DP00143     30
>DP00143     31
>DP00143     32
>DP00143     33
>DP00143     34
>DP00143     35
>DP00143     36
>DP00143     37
>DP00143     38
>DP00143     39
>DP00143     40
>DP00143     41
>DP00143     42
>DP00143     43
>DP00143     44
>DP00143     45
>DP00143     46
>DP00143     47
>DP00143     48
>DP00143     49
>DP00143     50
>DP00143     51
>DP00143     52
>DP00143     53
>DP00143     54
>DP00143     55
>DP00144     1
>DP00144     2
>DP00144     3
>DP00144     4
>DP00144     5
>DP00144     6
>DP00144     7
>DP00144     8
>DP00144     9
>DP00144     10
>DP00144     11
>DP00144     12
>DP00144     13
>DP00144     14
>DP00144     15
>DP00144     16
>DP00144     17
>DP00144     18
>DP00144     19
>DP00144     20
>DP00144     21
>DP00144     22
>DP00144     23
>DP00144     24
>DP00144     25
>DP00144     26
>DP00144     27
>DP00144     28
>DP00144     29
>DP00144     30
>DP00144     31
>DP00144     32
>DP00144     33
>DP00144     34
>DP00144     35
>DP00144     36
>DP00144     37
>DP00144     38
>DP00144     39
>DP00144     40
>DP00144     41
>DP00144     42
>DP00144     43
>DP00144     44
>DP00144     45
>DP00144     46
>DP00144     47
>DP00144     48
>DP00144     49
>DP00144     50
>DP00144     51
>DP00144     52
>DP00144     53
>DP00144     54
>DP00144     55
>DP00144     56
>DP00144     57
>DP00144     58
>DP00144     59
>DP00144     60
>DP00144     61
>DP00144     62
>DP00144     63
>DP00144     64
>DP00144     65
>DP00144     66
>DP00144     67
>DP00144     68
>DP00144     69
>DP00144     70
>DP00144     71
>DP00144     72
>DP00144     73
>DP00144     74
>DP00144     75
>DP00144     76
>DP00144     77
>DP00144     78
>DP00144     79
>DP00144     80
>DP00144     81
>DP00144     82
>DP00144     83
>DP00144     84
>DP00144     85
>DP00144     86
>DP00144     87
>DP00144     88
>DP00144     89
>DP00144     90
>DP00144     91
>DP00144     92
>DP00144     93
>DP00144     94
>DP00144     95
>DP00144     96
>DP00144     97
>DP00144     98
>DP00144     99
>DP00144     100
>DP00144     101
>DP00144     102
>DP00144     103
>DP00144     104
>DP00144     105
>DP00144     106
>DP00144     107
>DP00144     108
>DP00144     109
>DP00144     110
>DP00144     111
>DP00144     112
>DP00144     113
>DP00144     114
>DP00144     115
>DP00144     116
>DP00144     117
>DP00144     118
>DP00144     119
>DP00144     120
>DP00144     121
>DP00144     122
>DP00144     123
>DP00144     124
>DP00144     125
>DP00144     126
>DP00144     127
>DP00144     128
>DP00144     129
>DP00144     130
>DP00144     131
>DP00144     132
>DP00144     133
>DP00144     134
>DP00144     135
>DP00144     136
>DP00144     137
>DP00144     138
>DP00144     139
>DP00144     140
>DP00144     141
>DP00144     142
>DP00144     143
>DP00144     144
>DP00144     145
>DP00144     146
>DP00144     147
>DP00144     148
>DP00144     149
>DP00144     150
>DP00144     151
>DP00144     152
>DP00144     153
>DP00144     154
>DP00144     155
>DP00144     156
>DP00144     157
>DP00144     158
>DP00144     159
>DP00144     160
>DP00144     161
>DP00144     162
>DP00144     163
>DP00144     164
>DP00144     165
>DP00144     166
>DP00144     167
>DP00144     168
>DP00144     169
>DP00144     170
>DP00144     171
>DP00144     172
>DP00144     173
>DP00144     174
>DP00144     175
>DP00145     1
>DP00145     2
>DP00145     3
>DP00145     4
>DP00145     5
>DP00145     6
>DP00145     7
>DP00145     8
>DP00145     9
>DP00145     10
>DP00145     11
>DP00145     12
>DP00145     13
>DP00145     14
>DP00145     15
>DP00145     16
>DP00145     17
>DP00145     18
>DP00145     19
>DP00145     20
>DP00145     21
>DP00145     22
>DP00145     23
>DP00145     24
>DP00145     25
>DP00145     26
>DP00145     27
>DP00145     28
>DP00145     29
>DP00145     30
>DP00145     31
>DP00145     32
>DP00145     33
>DP00145     34
>DP00145     35
>DP00145     36
>DP00145     37
>DP00145     38
>DP00145     39
>DP00145     40
>DP00145     41
>DP00145     42
>DP00145     43
>DP00145     44
>DP00145     45
>DP00145     46
>DP00145     47
>DP00145     48
>DP00145     49
>DP00145     50
>DP00145     51
>DP00145     52
>DP00145     53
>DP00145     54
>DP00145     55
>DP00145     56
>DP00145     57
>DP00145     58
>DP00145     59
>DP00145     60
>DP00145     61
>DP00145     62
>DP00145     63
>DP00145     64
>DP00145     65
>DP00145     66
>DP00145     67
>DP00145     68
>DP00145     69
>DP00145     70
>DP00145     71
>DP00145     72
>DP00145     73
>DP00145     74
>DP00145     75
>DP00145     76
>DP00145     77
>DP00145     78
>DP00145     79
>DP00145     80
>DP00145     81
>DP00145     82
>DP00145     83
>DP00145     84
>DP00145     85
>DP00145     86
>DP00145     87
>DP00145     88
>DP00145     89
>DP00145     90
>DP00145     91
>DP00145     92
>DP00145     93
>DP00145     94
>DP00145     95
>DP00145     96
>DP00145     97
>DP00145     98
>DP00145     99
>DP00145     100
>DP00145     101
>DP00145     102
>DP00145     103
>DP00145     104
>DP00145     105
>DP00145     106
>DP00145     107
>DP00145     108
>DP00145     109
>DP00145     110
>DP00145     111
>DP00145     112
>DP00145     113
>DP00145     114
>DP00145     115
>DP00145     116
>DP00145     117
>DP00145     118
>DP00145     119
>DP00145     120
>DP00145     121
>DP00145     122
>DP00145     123
>DP00145     124
>DP00146     1
>DP00146     2
>DP00146     3
>DP00146     4
>DP00146     5
>DP00146     6
>DP00146     7
>DP00146     8
>DP00146     9
>DP00146     10
>DP00146     11
>DP00146     12
>DP00146     13
>DP00146     14
>DP00146     15
>DP00146     16
>DP00146     17
>DP00146     18
>DP00146     19
>DP00146     20
>DP00146     21
>DP00146     22
>DP00146     23
>DP00146     24
>DP00146     25
>DP00146     26
>DP00146     27
>DP00146     28
>DP00146     29
>DP00146     30
>DP00146     31
>DP00146     32
>DP00146     33
>DP00146     34
>DP00146     35
>DP00146     36
>DP00146     37
>DP00146     38
>DP00146     39
>DP00146     40
>DP00146     41
>DP00146     42
>DP00146     43
>DP00146     44
>DP00146     45
>DP00146     46
>DP00146     47
>DP00146     48
>DP00146     49
>DP00146     50
>DP00146     51
>DP00146     52
>DP00146     53
>DP00146     54
>DP00146     55
>DP00146     56
>DP00146     57
>DP00146     58
>DP00146     59
>DP00146     60
>DP00146     61
>DP00146     62
>DP00146     63
>DP00146     64
>DP00146     65
>DP00146     66
>DP00146     67
>DP00146     68
>DP00146     69
>DP00146     70
>DP00146     71
>DP00146     72
>DP00146     73
>DP00146     74
>DP00146     75
>DP00147     1
>DP00147     2
>DP00147     3
>DP00147     4
>DP00147     5
>DP00147     6
>DP00147     7
>DP00147     8
>DP00147     9
>DP00147     10
>DP00147     11
>DP00147     12
>DP00147     13
>DP00147     14
>DP00147     15
>DP00147     16
>DP00147     17
>DP00147     18
>DP00147     19
>DP00147     20
>DP00147     21
>DP00147     22
>DP00147     23
>DP00147     24
>DP00147     25
>DP00147     26
>DP00147     27
>DP00147     28
>DP00147     29
>DP00147     30
>DP00147     31
>DP00147     32
>DP00147     33
>DP00147     34
>DP00147     35
>DP00147     36
>DP00147     37
>DP00147     38
>DP00147     39
>DP00147     40
>DP00147     41
>DP00147     42
>DP00147     43
>DP00147     44
>DP00147     45
>DP00147     46
>DP00147     47
>DP00147     48
>DP00147     49
>DP00147     50
>DP00147     51
>DP00147     52
>DP00147     53
>DP00147     54
>DP00147     55
>DP00147     56
>DP00147     57
>DP00147     58
>DP00147     59
>DP00147     60
>DP00147     61
>DP00147     62
>DP00147     63
>DP00147     64
>DP00147     65
>DP00147     66
>DP00147     67
>DP00147     68
>DP00147     69
>DP00147     70
>DP00147     71
>DP00147     72
>DP00147     73
>DP00147     74
>DP00147     75
>DP00147     76
>DP00147     77
>DP00147     78
>DP00147     79
>DP00147     80
>DP00147     81
>DP00147     82
>DP00147     83
>DP00147     84
>DP00147     85
>DP00147     86
>DP00147     87
>DP00147     88
>DP00147     89
>DP00147     90
>DP00147     91
>DP00147     92
>DP00148     1
>DP00148     2
>DP00148     3
>DP00148     4
>DP00148     5
>DP00148     6
>DP00148     7
>DP00148     8
>DP00148     9
>DP00148     10
>DP00148     11
>DP00148     12
>DP00148     13
>DP00148     14
>DP00148     15
>DP00148     16
>DP00148     17
>DP00148     18
>DP00148     19
>DP00148     20
>DP00148     21
>DP00148     22
>DP00148     23
>DP00148     24
>DP00148     25
>DP00148     26
>DP00148     27
>DP00148     28
>DP00148     29
>DP00148     30
>DP00148     31
>DP00148     32
>DP00148     33
>DP00148     34
>DP00148     35
>DP00148     36
>DP00148     37
>DP00148     38
>DP00148     39
>DP00148     40
>DP00148     41
>DP00148     42
>DP00148     43
>DP00148     44
>DP00148     45
>DP00148     46
>DP00148     47
>DP00148     48
>DP00148     49
>DP00148     50
>DP00148     51
>DP00148     52
>DP00148     53
>DP00148     54
>DP00148     55
>DP00148     56
>DP00148     57
>DP00148     58
>DP00148     59
>DP00148     60
>DP00148     61
>DP00148     62
>DP00148     63
>DP00148     64
>DP00148     65
>DP00148     66
>DP00148     67
>DP00148     68
>DP00148     69
>DP00148     70
>DP00148     71
>DP00149     1
>DP00149     2
>DP00149     3
>DP00149     4
>DP00149     5
>DP00149     6
>DP00149     7
>DP00149     8
>DP00149     9
>DP00149     10
>DP00149     11
>DP00149     12
>DP00149     13
>DP00149     14
>DP00149     15
>DP00149     16
>DP00149     17
>DP00149     18
>DP00149     19
>DP00149     20
>DP00149     21
>DP00149     22
>DP00149     23
>DP00149     24
>DP00149     25
>DP00151     443
>DP00151     444
>DP00151     445
>DP00151     446
>DP00151     447
>DP00151     448
>DP00151     449
>DP00151     450
>DP00151     451
>DP00151     452
>DP00151     453
>DP00151     454
>DP00151     455
>DP00151     456
>DP00151     457
>DP00151     458
>DP00151     459
>DP00151     460
>DP00151     461
>DP00151     462
>DP00151     463
>DP00151     464
>DP00151     465
>DP00151     466
>DP00151     467
>DP00151     468
>DP00151     469
>DP00151     470
>DP00151     471
>DP00151     472
>DP00151     473
>DP00151     474
>DP00151     475
>DP00151     476
>DP00151     477
>DP00151     478
>DP00151     479
>DP00151     480
>DP00151     481
>DP00151     482
>DP00151     483
>DP00151     484
>DP00151     485
>DP00151     486
>DP00151     487
>DP00151     488
>DP00151     489
>DP00151     490
>DP00151     491
>DP00151     492
>DP00151     493
>DP00151     494
>DP00151     495
>DP00151     496
>DP00151     497
>DP00151     498
>DP00151     499
>DP00151     500
>DP00151     501
>DP00151     502
>DP00151     503
>DP00151     504
>DP00151     505
>DP00151     506
>DP00151     507
>DP00151     508
>DP00151     509
>DP00151     510
>DP00151     511
>DP00151     512
>DP00151     513
>DP00151     514
>DP00151     515
>DP00151     516
>DP00151     517
>DP00151     518
>DP00151     519
>DP00151     520
>DP00151     521
>DP00151     522
>DP00151     523
>DP00151     524
>DP00151     525
>DP00151     526
>DP00151     527
>DP00151     528
>DP00151     529
>DP00151     530
>DP00151     531
>DP00151     532
>DP00151     533
>DP00151     534
>DP00151     535
>DP00151     536
>DP00151     537
>DP00151     538
>DP00151     539
>DP00151     540
>DP00151     541
>DP00151     542
>DP00151     543
>DP00151     544
>DP00151     545
>DP00151     546
>DP00151     547
>DP00151     548
>DP00152     77
>DP00152     78
>DP00152     79
>DP00152     80
>DP00152     81
>DP00152     82
>DP00152     179
>DP00152     180
>DP00152     181
>DP00152     182
>DP00152     183
>DP00152     184
>DP00152     185
>DP00152     186
>DP00152     187
>DP00152     188
>DP00152     189
>DP00152     190
>DP00152     191
>DP00152     192
>DP00152     193
>DP00152     194
>DP00152     195
>DP00152     196
>DP00152     197
>DP00152     198
>DP00152     199
>DP00152     200
>DP00152     201
>DP00152     202
>DP00152     203
>DP00152     204
>DP00152     205
>DP00152     206
>DP00152     207
>DP00152     208
>DP00152     209
>DP00152     210
>DP00152     211
>DP00152     212
>DP00152     213
>DP00152     214
>DP00152     215
>DP00152     216
>DP00152     217
>DP00152     218
>DP00152     219
>DP00152     220
>DP00152     221
>DP00152     222
>DP00152     223
>DP00152     224
>DP00152     225
>DP00152     226
>DP00152     227
>DP00152     228
>DP00152     229
>DP00152     230
>DP00152     231
>DP00152     232
>DP00152     233
>DP00152     234
>DP00152     235
>DP00152     236
>DP00152     237
>DP00152     238
>DP00152     239
>DP00152     240
>DP00152     241
>DP00152     242
>DP00152     243
>DP00152     244
>DP00152     245
>DP00152     246
>DP00152     247
>DP00152     248
>DP00152     249
>DP00152     250
>DP00152     251
>DP00152     252
>DP00152     253
>DP00152     254
>DP00152     255
>DP00152     256
>DP00152     257
>DP00152     258
>DP00152     259
>DP00152     260
>DP00152     261
>DP00152     262
>DP00152     263
>DP00152     264
>DP00152     265
>DP00153     10
>DP00153     11
>DP00153     12
>DP00153     13
>DP00153     14
>DP00153     15
>DP00153     16
>DP00153     21
>DP00153     27
>DP00153     28
>DP00153     29
>DP00153     30
>DP00153     31
>DP00153     32
>DP00153     33
>DP00153     34
>DP00153     35
>DP00153     36
>DP00153     37
>DP00153     38
>DP00153     39
>DP00153     40
>DP00153     57
>DP00153     58
>DP00153     59
>DP00153     60
>DP00153     61
>DP00153     62
>DP00153     63
>DP00153     64
>DP00153     65
>DP00153     66
>DP00153     67
>DP00153     68
>DP00153     69
>DP00153     70
>DP00153     71
>DP00153     72
>DP00153     107
>DP00153     108
>DP00153     109
>DP00153     168
>DP00153     169
>DP00153     170
>DP00153     171
>DP00153     172
>DP00153     173
>DP00153     174
>DP00153     175
>DP00153     176
>DP00153     177
>DP00153     178
>DP00153     179
>DP00153     180
>DP00153     181
>DP00153     182
>DP00153     183
>DP00153     184
>DP00153     185
>DP00153     186
>DP00153     187
>DP00153     188
>DP00153     189
>DP00154     111
>DP00154     112
>DP00154     113
>DP00154     114
>DP00154     115
>DP00154     116
>DP00154     117
>DP00154     118
>DP00154     119
>DP00154     120
>DP00154     121
>DP00154     122
>DP00154     123
>DP00154     124
>DP00154     125
>DP00154     126
>DP00154     128
>DP00154     129
>DP00154     130
>DP00154     131
>DP00154     132
>DP00154     133
>DP00154     134
>DP00154     135
>DP00154     136
>DP00154     137
>DP00154     138
>DP00154     139
>DP00154     140
>DP00154     141
>DP00154     142
>DP00154     143
>DP00154     144
>DP00154     145
>DP00154     146
>DP00154     147
>DP00154     148
>DP00154     149
>DP00154     150
>DP00154     151
>DP00154     152
>DP00154     153
>DP00154     154
>DP00154     155
>DP00154     156
>DP00154     157
>DP00154     158
>DP00154     159
>DP00154     160
>DP00154     161
>DP00154     162
>DP00154     163
>DP00154     164
>DP00154     165
>DP00154     166
>DP00154     303
>DP00154     304
>DP00154     305
>DP00154     306
>DP00154     307
>DP00154     308
>DP00154     309
>DP00154     310
>DP00154     311
>DP00154     312
>DP00154     313
>DP00154     314
>DP00154     315
>DP00154     316
>DP00154     317
>DP00154     318
>DP00155     149
>DP00155     150
>DP00155     151
>DP00155     152
>DP00155     153
>DP00155     154
>DP00155     155
>DP00155     156
>DP00155     157
>DP00155     158
>DP00155     159
>DP00155     160
>DP00155     161
>DP00155     162
>DP00155     163
>DP00155     164
>DP00155     165
>DP00155     166
>DP00155     167
>DP00155     168
>DP00155     169
>DP00155     170
>DP00155     171
>DP00155     172
>DP00155     173
>DP00155     174
>DP00155     175
>DP00155     176
>DP00155     177
>DP00155     178
>DP00155     179
>DP00155     180
>DP00155     181
>DP00155     182
>DP00156     79
>DP00156     80
>DP00156     81
>DP00156     82
>DP00156     83
>DP00156     84
>DP00156     85
>DP00156     86
>DP00156     87
>DP00156     88
>DP00156     89
>DP00156     90
>DP00156     91
>DP00156     92
>DP00156     93
>DP00156     94
>DP00156     95
>DP00156     96
>DP00156     97
>DP00156     98
>DP00156     99
>DP00156     100
>DP00156     101
>DP00156     102
>DP00156     103
>DP00156     104
>DP00156     105
>DP00156     106
>DP00156     107
>DP00156     108
>DP00156     109
>DP00156     110
>DP00156     111
>DP00156     112
>DP00156     113
>DP00156     114
>DP00156     115
>DP00156     116
>DP00156     117
>DP00156     118
>DP00156     119
>DP00156     120
>DP00156     121
>DP00156     122
>DP00156     123
>DP00156     124
>DP00156     125
>DP00156     126
>DP00156     127
>DP00156     128
>DP00156     129
>DP00156     130
>DP00156     131
>DP00156     132
>DP00156     133
>DP00156     134
>DP00156     135
>DP00156     136
>DP00156     137
>DP00156     138
>DP00156     139
>DP00156     140
>DP00156     141
>DP00156     142
>DP00156     143
>DP00156     144
>DP00156     145
>DP00156     146
>DP00156     147
>DP00156     148
>DP00156     149
>DP00156     150
>DP00156     151
>DP00156     152
>DP00156     153
>DP00156     154
>DP00156     155
>DP00156     156
>DP00156     157
>DP00156     158
>DP00156     159
>DP00156     160
>DP00156     201
>DP00156     202
>DP00156     203
>DP00156     204
>DP00156     205
>DP00156     206
>DP00156     207
>DP00156     208
>DP00156     209
>DP00156     210
>DP00156     211
>DP00156     212
>DP00156     213
>DP00156     214
>DP00156     215
>DP00156     216
>DP00156     217
>DP00156     218
>DP00156     219
>DP00156     220
>DP00156     221
>DP00156     222
>DP00156     223
>DP00156     224
>DP00156     225
>DP00156     226
>DP00156     227
>DP00156     228
>DP00156     229
>DP00156     230
>DP00156     231
>DP00156     283
>DP00156     284
>DP00156     285
>DP00156     286
>DP00156     287
>DP00156     288
>DP00156     289
>DP00156     290
>DP00156     291
>DP00156     292
>DP00156     293
>DP00156     294
>DP00156     295
>DP00156     296
>DP00156     297
>DP00156     298
>DP00156     299
>DP00156     300
>DP00156     301
>DP00156     302
>DP00156     303
>DP00156     304
>DP00156     305
>DP00156     306
>DP00156     307
>DP00156     308
>DP00156     309
>DP00156     310
>DP00156     311
>DP00156     312
>DP00156     313
>DP00156     314
>DP00156     315
>DP00156     316
>DP00157     425
>DP00157     426
>DP00157     427
>DP00157     428
>DP00157     429
>DP00157     430
>DP00157     431
>DP00157     432
>DP00157     433
>DP00157     434
>DP00157     435
>DP00157     436
>DP00157     437
>DP00157     438
>DP00157     439
>DP00157     440
>DP00157     441
>DP00157     442
>DP00157     443
>DP00157     444
>DP00157     445
>DP00157     446
>DP00157     447
>DP00157     448
>DP00157     449
>DP00157     450
>DP00157     451
>DP00157     452
>DP00157     453
>DP00157     454
>DP00157     455
>DP00157     456
>DP00157     457
>DP00157     458
>DP00157     459
>DP00157     460
>DP00157     461
>DP00157     462
>DP00157     463
>DP00157     464
>DP00157     465
>DP00157     466
>DP00157     467
>DP00157     468
>DP00157     469
>DP00157     470
>DP00157     471
>DP00157     472
>DP00157     473
>DP00157     474
>DP00157     475
>DP00157     476
>DP00157     477
>DP00157     478
>DP00157     479
>DP00157     480
>DP00157     481
>DP00157     482
>DP00157     483
>DP00157     484
>DP00157     485
>DP00157     486
>DP00157     487
>DP00157     488
>DP00157     489
>DP00157     490
>DP00157     491
>DP00157     492
>DP00157     493
>DP00157     494
>DP00157     495
>DP00157     496
>DP00157     497
>DP00157     498
>DP00157     499
>DP00157     500
>DP00157     501
>DP00157     502
>DP00157     503
>DP00157     504
>DP00157     505
>DP00157     506
>DP00157     507
>DP00157     508
>DP00157     509
>DP00157     510
>DP00157     511
>DP00157     512
>DP00157     658
>DP00157     659
>DP00157     660
>DP00157     661
>DP00157     662
>DP00157     663
>DP00157     664
>DP00157     665
>DP00157     666
>DP00157     667
>DP00157     668
>DP00157     669
>DP00157     670
>DP00157     671
>DP00157     672
>DP00157     673
>DP00157     674
>DP00157     675
>DP00157     676
>DP00157     677
>DP00157     678
>DP00157     679
>DP00157     680
>DP00157     681
>DP00157     682
>DP00157     683
>DP00157     684
>DP00158     1
>DP00158     2
>DP00158     3
>DP00158     4
>DP00158     5
>DP00158     6
>DP00158     7
>DP00158     8
>DP00158     9
>DP00158     10
>DP00158     11
>DP00158     12
>DP00158     13
>DP00158     14
>DP00158     15
>DP00158     16
>DP00158     17
>DP00158     18
>DP00158     19
>DP00158     20
>DP00158     21
>DP00158     22
>DP00158     23
>DP00158     24
>DP00158     25
>DP00158     26
>DP00158     27
>DP00158     28
>DP00158     29
>DP00158     30
>DP00158     31
>DP00158     32
>DP00158     33
>DP00158     34
>DP00158     35
>DP00158     36
>DP00158     37
>DP00158     38
>DP00158     39
>DP00158     40
>DP00158     41
>DP00158     42
>DP00158     43
>DP00158     44
>DP00158     45
>DP00158     46
>DP00158     47
>DP00158     48
>DP00158     49
>DP00158     50
>DP00158     51
>DP00158     52
>DP00158     53
>DP00158     54
>DP00158     55
>DP00158     56
>DP00158     57
>DP00158     58
>DP00158     59
>DP00158     60
>DP00158     61
>DP00158     62
>DP00158     63
>DP00158     64
>DP00158     65
>DP00159     736
>DP00159     737
>DP00159     738
>DP00159     739
>DP00159     740
>DP00159     741
>DP00159     742
>DP00159     743
>DP00159     744
>DP00159     745
>DP00159     746
>DP00159     747
>DP00159     748
>DP00159     749
>DP00159     750
>DP00159     751
>DP00159     752
>DP00159     753
>DP00159     754
>DP00159     755
>DP00159     756
>DP00159     757
>DP00159     758
>DP00159     759
>DP00159     760
>DP00159     761
>DP00159     762
>DP00159     763
>DP00159     764
>DP00159     765
>DP00159     766
>DP00159     767
>DP00159     768
>DP00159     769
>DP00159     770
>DP00159     771
>DP00159     772
>DP00159     773
>DP00159     774
>DP00159     775
>DP00159     776
>DP00159     777
>DP00159     778
>DP00159     779
>DP00159     780
>DP00159     781
>DP00159     782
>DP00159     783
>DP00159     784
>DP00159     785
>DP00159     786
>DP00159     787
>DP00159     788
>DP00159     789
>DP00159     790
>DP00159     791
>DP00159     792
>DP00159     793
>DP00159     794
>DP00159     795
>DP00159     796
>DP00159     797
>DP00159     798
>DP00159     799
>DP00159     800
>DP00159     801
>DP00159     802
>DP00159     803
>DP00159     804
>DP00159     805
>DP00159     806
>DP00159     807
>DP00159     808
>DP00159     809
>DP00159     810
>DP00159     811
>DP00159     812
>DP00159     813
>DP00159     814
>DP00159     815
>DP00159     816
>DP00159     817
>DP00159     818
>DP00159     819
>DP00159     820
>DP00159     821
>DP00159     822
>DP00159     823
>DP00159     824
>DP00159     825
>DP00159     826
>DP00159     827
>DP00159     828
>DP00159     829
>DP00159     830
>DP00159     831
>DP00159     832
>DP00159     833
>DP00159     834
>DP00159     835
>DP00159     836
>DP00159     837
>DP00159     838
>DP00159     839
>DP00159     840
>DP00159     841
>DP00159     842
>DP00159     843
>DP00159     844
>DP00159     845
>DP00159     846
>DP00159     847
>DP00159     848
>DP00159     849
>DP00159     850
>DP00159     851
>DP00159     852
>DP00159     853
>DP00159     854
>DP00159     855
>DP00159     856
>DP00159     857
>DP00159     858
>DP00159     859
>DP00159     860
>DP00159     861
>DP00159     862
>DP00159     863
>DP00159     864
>DP00159     865
>DP00159     866
>DP00159     867
>DP00159     868
>DP00159     869
>DP00159     870
>DP00159     871
>DP00159     872
>DP00159     873
>DP00159     874
>DP00159     875
>DP00159     876
>DP00159     877
>DP00159     878
>DP00159     879
>DP00159     880
>DP00159     881
>DP00159     882
>DP00159     883
>DP00159     884
>DP00160     400
>DP00160     401
>DP00160     402
>DP00160     403
>DP00160     404
>DP00160     405
>DP00160     406
>DP00160     407
>DP00160     408
>DP00160     409
>DP00160     410
>DP00160     411
>DP00160     412
>DP00160     413
>DP00160     414
>DP00160     415
>DP00160     416
>DP00160     417
>DP00160     418
>DP00160     419
>DP00160     420
>DP00160     421
>DP00160     422
>DP00160     423
>DP00160     424
>DP00160     425
>DP00160     426
>DP00160     427
>DP00160     428
>DP00160     429
>DP00160     430
>DP00160     431
>DP00160     432
>DP00160     433
>DP00160     434
>DP00160     435
>DP00160     436
>DP00160     437
>DP00160     438
>DP00160     439
>DP00160     440
>DP00160     441
>DP00160     442
>DP00160     443
>DP00160     444
>DP00160     445
>DP00160     446
>DP00160     447
>DP00160     448
>DP00160     449
>DP00160     450
>DP00160     451
>DP00160     452
>DP00160     453
>DP00160     454
>DP00160     455
>DP00160     456
>DP00160     457
>DP00160     458
>DP00160     459
>DP00160     460
>DP00160     461
>DP00160     462
>DP00160     463
>DP00160     464
>DP00160     465
>DP00160     466
>DP00160     467
>DP00160     468
>DP00160     469
>DP00160     470
>DP00160     471
>DP00160     472
>DP00160     473
>DP00160     474
>DP00160     475
>DP00160     476
>DP00160     477
>DP00160     478
>DP00160     479
>DP00160     480
>DP00160     481
>DP00160     482
>DP00160     483
>DP00160     484
>DP00160     485
>DP00160     486
>DP00160     487
>DP00160     488
>DP00160     489
>DP00160     490
>DP00160     491
>DP00160     492
>DP00160     493
>DP00160     494
>DP00160     495
>DP00160     496
>DP00160     497
>DP00160     498
>DP00160     499
>DP00160     500
>DP00160     501
>DP00160     502
>DP00160     503
>DP00160     504
>DP00160     505
>DP00160     506
>DP00160     507
>DP00160     508
>DP00160     509
>DP00160     510
>DP00160     511
>DP00160     512
>DP00160     513
>DP00160     514
>DP00160     515
>DP00160     516
>DP00160     517
>DP00160     518
>DP00160     519
>DP00160     520
>DP00160     521
>DP00160     522
>DP00160     523
>DP00160     524
>DP00160     525
>DP00161     39
>DP00161     40
>DP00161     41
>DP00161     42
>DP00161     43
>DP00161     44
>DP00161     45
>DP00161     46
>DP00161     47
>DP00161     48
>DP00161     49
>DP00161     50
>DP00161     51
>DP00161     52
>DP00161     53
>DP00161     54
>DP00161     55
>DP00161     56
>DP00161     57
>DP00161     58
>DP00161     59
>DP00161     60
>DP00161     61
>DP00161     62
>DP00161     63
>DP00161     64
>DP00161     65
>DP00161     66
>DP00161     67
>DP00161     68
>DP00161     69
>DP00161     70
>DP00161     71
>DP00161     72
>DP00161     73
>DP00161     74
>DP00161     75
>DP00161     76
>DP00161     77
>DP00161     78
>DP00161     79
>DP00161     80
>DP00161     81
>DP00161     82
>DP00161     83
>DP00161     84
>DP00161     85
>DP00161     86
>DP00161     87
>DP00161     88
>DP00161     89
>DP00161     90
>DP00161     91
>DP00161     92
>DP00161     93
>DP00161     94
>DP00161     95
>DP00161     96
>DP00161     97
>DP00161     98
>DP00161     99
>DP00161     100
>DP00161     101
>DP00161     102
>DP00161     103
>DP00161     104
>DP00161     105
>DP00161     106
>DP00161     107
>DP00161     108
>DP00161     109
>DP00161     110
>DP00161     111
>DP00161     112
>DP00161     113
>DP00161     114
>DP00161     115
>DP00161     116
>DP00161     117
>DP00161     118
>DP00161     119
>DP00161     120
>DP00161     121
>DP00161     122
>DP00161     123
>DP00161     124
>DP00161     125
>DP00161     126
>DP00161     127
>DP00161     128
>DP00161     129
>DP00161     130
>DP00161     131
>DP00161     132
>DP00161     133
>DP00161     134
>DP00161     135
>DP00161     136
>DP00161     137
>DP00161     138
>DP00161     139
>DP00161     140
>DP00161     141
>DP00161     142
>DP00161     143
>DP00161     144
>DP00161     145
>DP00161     146
>DP00161     147
>DP00161     148
>DP00161     149
>DP00161     150
>DP00161     151
>DP00161     152
>DP00161     153
>DP00161     154
>DP00161     155
>DP00161     156
>DP00161     157
>DP00161     158
>DP00161     159
>DP00161     160
>DP00161     161
>DP00161     162
>DP00161     163
>DP00161     164
>DP00161     165
>DP00161     166
>DP00161     167
>DP00161     168
>DP00161     169
>DP00161     170
>DP00161     171
>DP00161     172
>DP00161     173
>DP00161     174
>DP00161     175
>DP00161     176
>DP00161     177
>DP00161     178
>DP00161     179
>DP00161     180
>DP00161     181
>DP00161     182
>DP00161     183
>DP00161     184
>DP00161     185
>DP00164     1
>DP00164     2
>DP00164     3
>DP00164     4
>DP00164     5
>DP00164     6
>DP00164     7
>DP00164     8
>DP00164     9
>DP00164     10
>DP00164     11
>DP00164     12
>DP00164     13
>DP00164     14
>DP00164     15
>DP00164     16
>DP00164     17
>DP00164     18
>DP00164     19
>DP00164     20
>DP00164     21
>DP00164     22
>DP00164     23
>DP00164     24
>DP00164     25
>DP00164     26
>DP00164     27
>DP00164     28
>DP00164     29
>DP00164     30
>DP00164     31
>DP00164     32
>DP00164     33
>DP00164     34
>DP00164     35
>DP00164     36
>DP00164     37
>DP00164     38
>DP00164     39
>DP00164     40
>DP00164     41
>DP00164     42
>DP00164     43
>DP00164     44
>DP00164     45
>DP00164     46
>DP00164     47
>DP00164     48
>DP00164     49
>DP00164     50
>DP00164     51
>DP00164     52
>DP00164     53
>DP00164     54
>DP00164     55
>DP00164     56
>DP00164     57
>DP00164     58
>DP00164     59
>DP00164     60
>DP00164     61
>DP00164     62
>DP00164     63
>DP00164     64
>DP00164     65
>DP00164     66
>DP00164     67
>DP00164     68
>DP00164     69
>DP00164     70
>DP00164     71
>DP00164     72
>DP00164     73
>DP00164     74
>DP00164     75
>DP00164     76
>DP00164     77
>DP00164     78
>DP00164     79
>DP00164     80
>DP00164     81
>DP00164     82
>DP00164     83
>DP00164     84
>DP00164     85
>DP00164     86
>DP00164     87
>DP00164     88
>DP00164     89
>DP00164     90
>DP00164     91
>DP00164     92
>DP00164     93
>DP00164     94
>DP00164     95
>DP00164     96
>DP00164     97
>DP00164     98
>DP00164     99
>DP00164     100
>DP00164     101
>DP00164     102
>DP00164     103
>DP00164     104
>DP00164     105
>DP00164     106
>DP00165     1
>DP00165     2
>DP00165     3
>DP00165     4
>DP00165     5
>DP00165     6
>DP00165     7
>DP00165     8
>DP00165     9
>DP00165     10
>DP00165     11
>DP00165     12
>DP00165     13
>DP00165     14
>DP00165     15
>DP00165     16
>DP00165     128
>DP00165     129
>DP00165     130
>DP00165     131
>DP00165     132
>DP00165     133
>DP00165     134
>DP00165     135
>DP00165     136
>DP00165     137
>DP00165     138
>DP00165     139
>DP00165     140
>DP00165     141
>DP00165     142
>DP00165     143
>DP00165     144
>DP00165     145
>DP00165     146
>DP00165     147
>DP00165     148
>DP00165     149
>DP00165     150
>DP00165     151
>DP00165     152
>DP00165     153
>DP00165     154
>DP00165     155
>DP00165     156
>DP00165     157
>DP00165     158
>DP00165     159
>DP00165     160
>DP00165     161
>DP00165     162
>DP00165     163
>DP00165     164
>DP00165     165
>DP00165     166
>DP00165     167
>DP00165     168
>DP00165     169
>DP00165     170
>DP00165     171
>DP00165     172
>DP00165     173
>DP00165     174
>DP00165     175
>DP00166     31
>DP00166     32
>DP00166     33
>DP00166     34
>DP00166     66
>DP00166     67
>DP00166     68
>DP00166     69
>DP00166     70
>DP00166     71
>DP00166     72
>DP00166     73
>DP00166     74
>DP00166     75
>DP00166     76
>DP00166     77
>DP00166     78
>DP00166     79
>DP00166     80
>DP00166     81
>DP00166     82
>DP00166     83
>DP00166     84
>DP00166     85
>DP00166     86
>DP00166     87
>DP00166     88
>DP00166     89
>DP00166     137
>DP00166     138
>DP00166     139
>DP00166     140
>DP00166     141
>DP00166     142
>DP00166     143
>DP00166     144
>DP00166     145
>DP00166     146
>DP00166     147
>DP00166     148
>DP00166     163
>DP00166     164
>DP00166     165
>DP00166     166
>DP00166     167
>DP00166     168
>DP00166     169
>DP00166     170
>DP00166     171
>DP00166     172
>DP00166     173
>DP00166     174
>DP00166     175
>DP00166     176
>DP00166     177
>DP00166     178
>DP00166     179
>DP00166     180
>DP00166     181
>DP00166     182
>DP00166     183
>DP00166     184
>DP00166     185
>DP00166     186
>DP00166     187
>DP00166     188
>DP00166     189
>DP00166     190
>DP00166     191
>DP00166     192
>DP00166     193
>DP00166     194
>DP00166     195
>DP00166     196
>DP00166     197
>DP00166     198
>DP00166     199
>DP00166     200
>DP00166     201
>DP00166     202
>DP00166     203
>DP00166     204
>DP00166     205
>DP00166     206
>DP00166     207
>DP00166     208
>DP00166     209
>DP00166     210
>DP00167     32
>DP00167     33
>DP00167     34
>DP00167     35
>DP00167     36
>DP00167     45
>DP00167     46
>DP00167     47
>DP00167     48
>DP00167     49
>DP00167     50
>DP00167     51
>DP00167     52
>DP00167     53
>DP00167     54
>DP00167     55
>DP00167     60
>DP00167     61
>DP00167     62
>DP00167     63
>DP00167     64
>DP00167     65
>DP00167     66
>DP00168     1
>DP00168     2
>DP00168     3
>DP00168     4
>DP00168     5
>DP00168     6
>DP00168     7
>DP00168     8
>DP00168     9
>DP00168     10
>DP00168     11
>DP00168     12
>DP00168     13
>DP00168     14
>DP00168     15
>DP00168     16
>DP00168     17
>DP00168     18
>DP00168     19
>DP00168     20
>DP00168     21
>DP00168     22
>DP00168     23
>DP00168     24
>DP00168     25
>DP00168     26
>DP00168     27
>DP00168     28
>DP00168     29
>DP00168     30
>DP00168     31
>DP00168     32
>DP00168     33
>DP00168     34
>DP00168     35
>DP00168     36
>DP00168     37
>DP00168     38
>DP00168     39
>DP00168     40
>DP00168     41
>DP00168     42
>DP00168     43
>DP00168     44
>DP00168     45
>DP00168     46
>DP00168     47
>DP00168     48
>DP00170     1
>DP00170     2
>DP00170     3
>DP00170     4
>DP00170     5
>DP00170     6
>DP00170     7
>DP00170     8
>DP00170     9
>DP00170     10
>DP00170     11
>DP00170     12
>DP00170     13
>DP00170     14
>DP00170     15
>DP00170     16
>DP00170     17
>DP00170     18
>DP00170     19
>DP00170     20
>DP00170     21
>DP00170     22
>DP00170     23
>DP00170     24
>DP00170     25
>DP00170     26
>DP00170     27
>DP00170     28
>DP00170     29
>DP00170     30
>DP00170     31
>DP00170     32
>DP00170     33
>DP00170     34
>DP00170     35
>DP00170     36
>DP00170     37
>DP00170     38
>DP00170     39
>DP00170     40
>DP00170     41
>DP00170     42
>DP00170     43
>DP00170     44
>DP00170     45
>DP00170     46
>DP00170     47
>DP00170     48
>DP00170     49
>DP00170     50
>DP00170     51
>DP00170     52
>DP00170     53
>DP00170     54
>DP00170     55
>DP00170     56
>DP00170     57
>DP00170     58
>DP00170     59
>DP00170     60
>DP00170     61
>DP00170     62
>DP00170     63
>DP00170     64
>DP00170     65
>DP00170     66
>DP00170     67
>DP00170     68
>DP00170     69
>DP00170     70
>DP00170     71
>DP00170     72
>DP00170     73
>DP00170     74
>DP00170     75
>DP00170     76
>DP00170     77
>DP00170     78
>DP00170     79
>DP00170     80
>DP00170     81
>DP00170     82
>DP00170     83
>DP00170     84
>DP00170     85
>DP00170     86
>DP00170     87
>DP00170     88
>DP00170     89
>DP00170     90
>DP00170     91
>DP00170     92
>DP00170     93
>DP00170     94
>DP00170     95
>DP00170     96
>DP00170     97
>DP00170     98
>DP00170     99
>DP00170     100
>DP00170     101
>DP00170     102
>DP00170     103
>DP00170     104
>DP00170     105
>DP00170     106
>DP00170     107
>DP00170     108
>DP00170     109
>DP00170     110
>DP00170     111
>DP00170     112
>DP00170     113
>DP00170     114
>DP00170     115
>DP00170     116
>DP00170     117
>DP00170     118
>DP00170     119
>DP00170     120
>DP00170     121
>DP00170     122
>DP00170     123
>DP00170     124
>DP00170     125
>DP00170     126
>DP00170     127
>DP00170     128
>DP00170     129
>DP00170     130
>DP00170     131
>DP00170     132
>DP00170     133
>DP00170     134
>DP00170     135
>DP00170     136
>DP00170     137
>DP00170     138
>DP00170     139
>DP00170     140
>DP00170     141
>DP00170     142
>DP00170     143
>DP00170     144
>DP00170     145
>DP00170     146
>DP00170     147
>DP00170     148
>DP00170     149
>DP00170     150
>DP00170     151
>DP00170     152
>DP00170     153
>DP00170     154
>DP00170     155
>DP00170     156
>DP00170     157
>DP00170     158
>DP00170     159
>DP00170     160
>DP00170     161
>DP00170     162
>DP00170     163
>DP00170     164
>DP00170     165
>DP00170     166
>DP00170     167
>DP00170     168
>DP00170     169
>DP00170     170
>DP00170     171
>DP00170     172
>DP00170     173
>DP00170     174
>DP00170     175
>DP00170     176
>DP00170     177
>DP00170     178
>DP00170     179
>DP00170     180
>DP00170     181
>DP00170     182
>DP00170     183
>DP00170     184
>DP00170     185
>DP00170     186
>DP00170     187
>DP00170     188
>DP00170     189
>DP00170     190
>DP00170     191
>DP00170     192
>DP00170     193
>DP00170     194
>DP00170     195
>DP00170     196
>DP00170     197
>DP00170     198
>DP00170     199
>DP00170     200
>DP00170     201
>DP00170     202
>DP00170     203
>DP00170     204
>DP00170     205
>DP00170     206
>DP00170     207
>DP00170     208
>DP00170     209
>DP00170     210
>DP00170     211
>DP00170     212
>DP00170     213
>DP00170     214
>DP00170     215
>DP00170     216
>DP00170     217
>DP00170     218
>DP00170     219
>DP00170     220
>DP00170     221
>DP00170     222
>DP00170     223
>DP00170     224
>DP00170     225
>DP00170     226
>DP00171     51
>DP00171     52
>DP00171     53
>DP00171     54
>DP00171     55
>DP00171     64
>DP00171     73
>DP00171     74
>DP00171     75
>DP00171     76
>DP00171     102
>DP00171     103
>DP00171     104
>DP00171     105
>DP00171     106
>DP00171     107
>DP00171     108
>DP00171     113
>DP00171     114
>DP00171     115
>DP00171     116
>DP00171     117
>DP00171     132
>DP00171     136
>DP00171     137
>DP00171     138
>DP00171     146
>DP00171     147
>DP00171     148
>DP00171     149
>DP00171     150
>DP00171     185
>DP00171     186
>DP00171     187
>DP00172     1
>DP00172     2
>DP00172     3
>DP00172     4
>DP00172     5
>DP00172     6
>DP00172     7
>DP00172     8
>DP00172     9
>DP00172     10
>DP00172     11
>DP00172     12
>DP00172     13
>DP00172     14
>DP00172     15
>DP00172     16
>DP00172     38
>DP00172     39
>DP00172     40
>DP00172     41
>DP00172     42
>DP00172     43
>DP00172     44
>DP00173     1
>DP00173     2
>DP00173     3
>DP00173     4
>DP00173     5
>DP00173     6
>DP00173     7
>DP00173     8
>DP00173     9
>DP00173     10
>DP00173     11
>DP00173     12
>DP00173     13
>DP00173     14
>DP00173     15
>DP00173     16
>DP00173     17
>DP00173     18
>DP00173     19
>DP00173     20
>DP00173     21
>DP00173     22
>DP00173     23
>DP00173     24
>DP00173     25
>DP00173     26
>DP00173     27
>DP00173     28
>DP00173     29
>DP00173     30
>DP00173     31
>DP00173     32
>DP00173     33
>DP00173     34
>DP00173     35
>DP00173     36
>DP00173     37
>DP00173     38
>DP00173     39
>DP00173     40
>DP00173     41
>DP00173     42
>DP00173     43
>DP00173     44
>DP00173     45
>DP00173     46
>DP00173     47
>DP00173     48
>DP00173     49
>DP00173     50
>DP00173     51
>DP00173     52
>DP00173     53
>DP00173     54
>DP00173     55
>DP00173     56
>DP00173     57
>DP00173     58
>DP00173     59
>DP00173     60
>DP00173     61
>DP00173     62
>DP00173     63
>DP00173     64
>DP00173     65
>DP00173     66
>DP00173     67
>DP00173     68
>DP00173     69
>DP00173     70
>DP00173     71
>DP00173     72
>DP00173     73
>DP00173     74
>DP00173     75
>DP00173     76
>DP00173     77
>DP00173     78
>DP00173     79
>DP00173     80
>DP00173     81
>DP00173     82
>DP00173     83
>DP00173     84
>DP00173     85
>DP00173     86
>DP00173     87
>DP00173     88
>DP00173     89
>DP00173     90
>DP00173     91
>DP00173     92
>DP00173     93
>DP00173     94
>DP00173     95
>DP00173     96
>DP00173     97
>DP00173     98
>DP00173     99
>DP00173     100
>DP00173     101
>DP00173     102
>DP00173     103
>DP00173     104
>DP00173     105
>DP00173     106
>DP00173     107
>DP00173     108
>DP00173     109
>DP00173     110
>DP00173     111
>DP00173     112
>DP00173     113
>DP00173     114
>DP00173     115
>DP00173     116
>DP00175     1
>DP00175     2
>DP00175     3
>DP00175     4
>DP00175     5
>DP00175     6
>DP00175     7
>DP00175     8
>DP00175     9
>DP00175     10
>DP00175     11
>DP00175     12
>DP00175     13
>DP00175     14
>DP00175     15
>DP00175     16
>DP00175     17
>DP00175     18
>DP00175     19
>DP00175     20
>DP00175     21
>DP00175     22
>DP00175     23
>DP00175     24
>DP00175     25
>DP00175     26
>DP00175     27
>DP00175     28
>DP00175     29
>DP00175     30
>DP00175     31
>DP00175     32
>DP00175     33
>DP00175     34
>DP00175     35
>DP00175     36
>DP00175     37
>DP00175     38
>DP00175     39
>DP00175     40
>DP00175     41
>DP00175     42
>DP00175     43
>DP00175     44
>DP00175     45
>DP00175     46
>DP00175     47
>DP00175     48
>DP00175     49
>DP00175     50
>DP00175     51
>DP00175     52
>DP00175     53
>DP00175     54
>DP00175     55
>DP00175     56
>DP00177     879
>DP00177     880
>DP00177     881
>DP00177     882
>DP00177     883
>DP00177     884
>DP00177     885
>DP00177     886
>DP00177     887
>DP00177     888
>DP00177     889
>DP00177     890
>DP00177     891
>DP00177     892
>DP00177     893
>DP00177     894
>DP00177     895
>DP00177     896
>DP00177     897
>DP00177     898
>DP00177     899
>DP00177     900
>DP00177     901
>DP00177     902
>DP00177     903
>DP00177     904
>DP00177     905
>DP00177     906
>DP00177     907
>DP00177     908
>DP00177     909
>DP00177     910
>DP00177     911
>DP00177     912
>DP00177     913
>DP00177     914
>DP00177     915
>DP00177     916
>DP00177     917
>DP00177     918
>DP00177     919
>DP00177     920
>DP00177     921
>DP00177     922
>DP00177     923
>DP00177     924
>DP00177     925
>DP00177     926
>DP00177     927
>DP00177     928
>DP00177     929
>DP00177     930
>DP00177     931
>DP00177     932
>DP00177     933
>DP00177     934
>DP00177     935
>DP00177     936
>DP00177     937
>DP00177     938
>DP00177     939
>DP00177     940
>DP00177     941
>DP00177     942
>DP00177     943
>DP00177     944
>DP00177     945
>DP00177     946
>DP00177     947
>DP00177     948
>DP00177     949
>DP00177     950
>DP00177     951
>DP00177     952
>DP00177     953
>DP00177     954
>DP00177     955
>DP00177     956
>DP00177     957
>DP00177     958
>DP00177     959
>DP00177     960
>DP00177     961
>DP00178     404
>DP00178     405
>DP00178     406
>DP00178     407
>DP00178     408
>DP00178     409
>DP00178     410
>DP00178     411
>DP00178     412
>DP00178     413
>DP00178     414
>DP00178     415
>DP00178     416
>DP00178     417
>DP00178     418
>DP00178     419
>DP00178     420
>DP00178     421
>DP00178     422
>DP00178     423
>DP00178     424
>DP00178     425
>DP00178     426
>DP00178     427
>DP00178     428
>DP00178     429
>DP00178     430
>DP00178     431
>DP00178     432
>DP00178     433
>DP00178     434
>DP00178     435
>DP00178     436
>DP00178     437
>DP00178     438
>DP00178     439
>DP00178     440
>DP00178     441
>DP00178     442
>DP00178     443
>DP00178     444
>DP00178     445
>DP00178     446
>DP00178     447
>DP00178     448
>DP00178     449
>DP00178     450
>DP00178     451
>DP00181     1592
>DP00181     1593
>DP00181     1594
>DP00181     1595
>DP00181     1596
>DP00181     1597
>DP00181     1598
>DP00181     1599
>DP00181     1600
>DP00181     1601
>DP00181     1602
>DP00181     1603
>DP00181     1604
>DP00181     1605
>DP00181     1606
>DP00181     1607
>DP00181     1608
>DP00181     1609
>DP00181     1610
>DP00181     1611
>DP00181     1612
>DP00181     1613
>DP00181     1614
>DP00181     1615
>DP00181     1616
>DP00181     1617
>DP00181     1618
>DP00181     1619
>DP00181     1620
>DP00181     1621
>DP00181     1622
>DP00181     1623
>DP00181     1624
>DP00181     1625
>DP00181     1626
>DP00181     1627
>DP00181     1628
>DP00181     1629
>DP00181     1630
>DP00181     1631
>DP00181     1632
>DP00181     1633
>DP00181     1634
>DP00181     1635
>DP00181     1636
>DP00181     1637
>DP00181     1638
>DP00181     1639
>DP00181     1640
>DP00181     1641
>DP00181     1642
>DP00181     1643
>DP00181     1644
>DP00181     1645
>DP00181     1646
>DP00181     1647
>DP00181     1648
>DP00181     1649
>DP00181     1650
>DP00181     1651
>DP00181     1652
>DP00181     1653
>DP00181     1654
>DP00181     1655
>DP00181     1656
>DP00181     1657
>DP00181     1658
>DP00181     1659
>DP00181     1660
>DP00181     1661
>DP00181     1662
>DP00181     1663
>DP00181     1664
>DP00181     1665
>DP00181     1666
>DP00181     1667
>DP00181     1668
>DP00181     1669
>DP00181     1670
>DP00181     1671
>DP00181     1672
>DP00181     1673
>DP00181     1674
>DP00181     1675
>DP00181     1676
>DP00181     1677
>DP00181     1678
>DP00181     1679
>DP00181     1680
>DP00181     1681
>DP00181     1682
>DP00181     1683
>DP00181     1684
>DP00181     1685
>DP00181     1686
>DP00181     1687
>DP00181     1688
>DP00181     1689
>DP00181     1690
>DP00181     1691
>DP00181     1692
>DP00181     1693
>DP00181     1694
>DP00181     1695
>DP00181     1696
>DP00181     1697
>DP00181     1698
>DP00181     1699
>DP00181     1700
>DP00181     1701
>DP00181     1702
>DP00181     1703
>DP00181     1704
>DP00181     1705
>DP00181     1706
>DP00181     1707
>DP00181     1708
>DP00181     1709
>DP00181     1710
>DP00181     1711
>DP00181     1712
>DP00181     1713
>DP00181     1714
>DP00181     1715
>DP00181     1716
>DP00181     1717
>DP00181     1718
>DP00181     1719
>DP00181     1720
>DP00181     1721
>DP00181     1722
>DP00181     1723
>DP00181     1724
>DP00181     1725
>DP00181     1726
>DP00181     1727
>DP00181     1728
>DP00181     1729
>DP00181     1730
>DP00181     1731
>DP00181     1732
>DP00181     1733
>DP00181     1734
>DP00181     1735
>DP00181     1736
>DP00181     1737
>DP00181     1738
>DP00181     1739
>DP00181     1740
>DP00181     1741
>DP00181     1742
>DP00181     1743
>DP00181     1744
>DP00181     1745
>DP00181     1746
>DP00181     1747
>DP00181     1748
>DP00181     1749
>DP00181     1750
>DP00181     1751
>DP00181     1752
>DP00181     1753
>DP00181     1754
>DP00181     1755
>DP00181     1756
>DP00181     1757
>DP00181     1758
>DP00181     1759
>DP00181     1760
>DP00181     1761
>DP00181     1762
>DP00181     1763
>DP00181     1764
>DP00181     1765
>DP00181     1766
>DP00181     1767
>DP00181     1768
>DP00181     1769
>DP00181     1770
>DP00181     1771
>DP00181     1772
>DP00181     1773
>DP00181     1774
>DP00181     1775
>DP00181     1776
>DP00181     1777
>DP00181     1778
>DP00181     1779
>DP00181     1780
>DP00181     1781
>DP00181     1782
>DP00181     1783
>DP00181     1784
>DP00181     1785
>DP00181     1786
>DP00181     1787
>DP00181     1788
>DP00181     1789
>DP00181     1790
>DP00181     1791
>DP00181     1792
>DP00181     1793
>DP00181     1794
>DP00181     1795
>DP00181     1796
>DP00181     1797
>DP00181     1798
>DP00181     1799
>DP00181     1800
>DP00181     1801
>DP00181     1802
>DP00181     1803
>DP00181     1804
>DP00181     1805
>DP00181     1806
>DP00181     1807
>DP00181     1808
>DP00181     1809
>DP00181     1810
>DP00181     1811
>DP00181     1812
>DP00181     1813
>DP00181     1814
>DP00181     1815
>DP00181     1816
>DP00181     1817
>DP00181     1818
>DP00181     1819
>DP00181     1820
>DP00181     1821
>DP00181     1822
>DP00181     1823
>DP00181     1824
>DP00181     1825
>DP00181     1826
>DP00181     1827
>DP00181     1828
>DP00181     1829
>DP00181     1830
>DP00181     1831
>DP00181     1832
>DP00181     1833
>DP00181     1834
>DP00181     1835
>DP00181     1836
>DP00181     1837
>DP00181     1838
>DP00181     1839
>DP00181     1840
>DP00181     1841
>DP00181     1842
>DP00181     1843
>DP00181     1844
>DP00181     1845
>DP00181     1846
>DP00181     1847
>DP00181     1848
>DP00181     1849
>DP00181     1850
>DP00181     1851
>DP00181     1852
>DP00181     1853
>DP00181     1854
>DP00181     1855
>DP00181     1856
>DP00181     1857
>DP00181     1858
>DP00181     1859
>DP00181     1860
>DP00181     1861
>DP00181     1862
>DP00181     1863
>DP00181     1864
>DP00181     1865
>DP00181     1866
>DP00181     1867
>DP00181     1868
>DP00181     1869
>DP00181     1870
>DP00181     1871
>DP00181     1872
>DP00181     1873
>DP00181     1874
>DP00181     1875
>DP00181     1876
>DP00181     1877
>DP00181     1878
>DP00181     1879
>DP00181     1880
>DP00181     1881
>DP00181     1882
>DP00181     1883
>DP00181     1884
>DP00181     1885
>DP00181     1886
>DP00181     1887
>DP00181     1888
>DP00181     1889
>DP00181     1890
>DP00181     1891
>DP00181     1892
>DP00181     1893
>DP00181     1894
>DP00181     1895
>DP00181     1896
>DP00181     1897
>DP00181     1898
>DP00181     1899
>DP00181     1900
>DP00181     1901
>DP00181     1902
>DP00181     1903
>DP00181     1904
>DP00181     1905
>DP00181     1906
>DP00181     1907
>DP00181     1908
>DP00181     1909
>DP00181     1910
>DP00181     1911
>DP00181     1912
>DP00181     1913
>DP00181     1914
>DP00181     1915
>DP00181     1916
>DP00181     1917
>DP00181     1918
>DP00181     1919
>DP00181     1920
>DP00181     1921
>DP00181     1922
>DP00181     1923
>DP00181     1924
>DP00181     1925
>DP00181     1926
>DP00181     1927
>DP00181     1928
>DP00181     1929
>DP00181     1930
>DP00181     1931
>DP00181     1932
>DP00181     1933
>DP00181     1934
>DP00181     1935
>DP00181     1936
>DP00181     1937
>DP00181     1938
>DP00181     1939
>DP00181     1940
>DP00181     1941
>DP00181     1942
>DP00181     1943
>DP00181     1944
>DP00181     1945
>DP00181     1946
>DP00181     1947
>DP00181     1948
>DP00181     1949
>DP00181     1950
>DP00181     1951
>DP00181     1952
>DP00181     1953
>DP00181     1954
>DP00181     1955
>DP00181     1956
>DP00181     1957
>DP00181     1958
>DP00181     1959
>DP00184     424
>DP00184     425
>DP00184     426
>DP00184     427
>DP00187     29
>DP00187     30
>DP00187     31
>DP00187     32
>DP00187     33
>DP00187     34
>DP00187     35
>DP00187     36
>DP00187     37
>DP00187     38
>DP00187     39
>DP00187     40
>DP00187     41
>DP00187     42
>DP00187     43
>DP00187     44
>DP00187     45
>DP00187     46
>DP00187     47
>DP00187     48
>DP00187     49
>DP00187     50
>DP00187     51
>DP00187     52
>DP00187     53
>DP00187     54
>DP00187     55
>DP00187     56
>DP00187     57
>DP00187     58
>DP00187     59
>DP00187     60
>DP00187     61
>DP00187     62
>DP00187     63
>DP00187     64
>DP00187     65
>DP00187     66
>DP00187     67
>DP00187     68
>DP00187     69
>DP00187     70
>DP00187     71
>DP00187     72
>DP00187     73
>DP00187     74
>DP00187     75
>DP00187     76
>DP00187     77
>DP00187     78
>DP00187     79
>DP00187     80
>DP00187     81
>DP00187     82
>DP00187     83
>DP00187     84
>DP00187     85
>DP00187     86
>DP00187     87
>DP00187     88
>DP00187     89
>DP00187     90
>DP00187     91
>DP00187     92
>DP00187     93
>DP00187     94
>DP00187     95
>DP00187     96
>DP00187     97
>DP00187     98
>DP00187     99
>DP00187     100
>DP00187     101
>DP00187     102
>DP00187     103
>DP00187     104
>DP00187     105
>DP00187     106
>DP00187     107
>DP00187     108
>DP00187     109
>DP00187     110
>DP00187     111
>DP00187     112
>DP00187     113
>DP00187     114
>DP00187     115
>DP00187     116
>DP00187     117
>DP00187     118
>DP00187     119
>DP00187     120
>DP00187     121
>DP00187     122
>DP00187     123
>DP00187     124
>DP00189     2
>DP00189     3
>DP00189     4
>DP00189     5
>DP00189     6
>DP00189     7
>DP00189     8
>DP00189     9
>DP00189     10
>DP00189     11
>DP00189     12
>DP00189     13
>DP00189     14
>DP00189     15
>DP00189     16
>DP00189     23
>DP00189     24
>DP00189     25
>DP00189     26
>DP00189     27
>DP00189     28
>DP00189     29
>DP00189     30
>DP00189     31
>DP00189     32
>DP00189     33
>DP00189     34
>DP00189     42
>DP00189     43
>DP00189     44
>DP00189     45
>DP00189     46
>DP00189     47
>DP00189     48
>DP00189     49
>DP00189     50
>DP00189     51
>DP00189     52
>DP00189     53
>DP00189     54
>DP00189     55
>DP00189     56
>DP00189     57
>DP00190     52
>DP00190     53
>DP00190     54
>DP00190     55
>DP00190     56
>DP00190     57
>DP00190     58
>DP00190     59
>DP00190     60
>DP00190     61
>DP00190     62
>DP00190     63
>DP00190     64
>DP00190     65
>DP00190     66
>DP00190     67
>DP00190     68
>DP00190     69
>DP00190     70
>DP00190     71
>DP00190     72
>DP00190     73
>DP00190     74
>DP00190     75
>DP00190     76
>DP00190     77
>DP00190     78
>DP00190     79
>DP00190     80
>DP00190     81
>DP00190     82
>DP00190     83
>DP00190     84
>DP00190     85
>DP00190     86
>DP00190     87
>DP00190     88
>DP00190     89
>DP00190     90
>DP00190     91
>DP00190     92
>DP00190     93
>DP00190     94
>DP00190     95
>DP00190     96
>DP00190     97
>DP00190     98
>DP00190     99
>DP00190     100
>DP00190     101
>DP00190     102
>DP00190     103
>DP00190     104
>DP00190     105
>DP00190     106
>DP00190     107
>DP00190     108
>DP00190     109
>DP00190     110
>DP00190     111
>DP00190     112
>DP00190     113
>DP00190     114
>DP00190     115
>DP00190     116
>DP00190     117
>DP00190     118
>DP00190     119
>DP00190     120
>DP00190     121
>DP00190     122
>DP00190     123
>DP00190     124
>DP00190     125
>DP00190     126
>DP00190     127
>DP00190     128
>DP00190     129
>DP00190     130
>DP00190     131
>DP00190     132
>DP00190     133
>DP00190     134
>DP00190     135
>DP00190     136
>DP00190     137
>DP00190     138
>DP00190     139
>DP00190     140
>DP00190     141
>DP00190     142
>DP00190     143
>DP00190     144
>DP00190     145
>DP00190     146
>DP00190     147
>DP00190     148
>DP00190     149
>DP00190     150
>DP00190     151
>DP00190     152
>DP00190     153
>DP00190     154
>DP00190     155
>DP00190     156
>DP00190     157
>DP00190     158
>DP00190     159
>DP00190     160
>DP00190     161
>DP00190     162
>DP00190     163
>DP00190     164
>DP00190     165
>DP00190     166
>DP00190     167
>DP00190     168
>DP00190     169
>DP00190     170
>DP00190     171
>DP00190     172
>DP00190     173
>DP00190     174
>DP00190     175
>DP00190     176
>DP00190     177
>DP00190     178
>DP00190     179
>DP00190     180
>DP00190     181
>DP00190     182
>DP00190     183
>DP00190     184
>DP00190     185
>DP00190     186
>DP00190     187
>DP00190     188
>DP00190     189
>DP00190     190
>DP00190     191
>DP00190     192
>DP00190     193
>DP00190     194
>DP00190     195
>DP00190     196
>DP00190     197
>DP00190     198
>DP00190     199
>DP00190     200
>DP00190     201
>DP00190     202
>DP00190     203
>DP00190     204
>DP00190     205
>DP00190     206
>DP00190     207
>DP00190     208
>DP00190     209
>DP00190     210
>DP00190     211
>DP00190     212
>DP00190     213
>DP00190     214
>DP00190     215
>DP00190     216
>DP00190     217
>DP00190     218
>DP00190     219
>DP00190     220
>DP00190     221
>DP00190     222
>DP00190     223
>DP00190     224
>DP00190     225
>DP00190     226
>DP00190     227
>DP00190     228
>DP00190     229
>DP00190     230
>DP00190     231
>DP00190     232
>DP00190     233
>DP00190     234
>DP00190     235
>DP00190     236
>DP00190     237
>DP00190     238
>DP00190     239
>DP00190     240
>DP00190     241
>DP00190     242
>DP00190     243
>DP00190     244
>DP00190     245
>DP00190     246
>DP00190     247
>DP00190     248
>DP00190     249
>DP00190     250
>DP00190     251
>DP00190     252
>DP00190     253
>DP00190     254
>DP00190     255
>DP00192     1
>DP00192     2
>DP00192     3
>DP00192     4
>DP00192     5
>DP00192     6
>DP00192     7
>DP00192     8
>DP00192     9
>DP00192     10
>DP00192     11
>DP00192     12
>DP00192     13
>DP00192     14
>DP00192     15
>DP00192     16
>DP00192     17
>DP00192     18
>DP00192     19
>DP00192     20
>DP00192     21
>DP00192     22
>DP00192     23
>DP00192     24
>DP00192     25
>DP00192     26
>DP00192     27
>DP00192     28
>DP00192     29
>DP00192     30
>DP00192     31
>DP00192     32
>DP00192     33
>DP00192     34
>DP00192     35
>DP00192     36
>DP00192     37
>DP00192     38
>DP00192     39
>DP00192     40
>DP00192     41
>DP00192     42
>DP00192     43
>DP00192     44
>DP00192     45
>DP00192     46
>DP00192     47
>DP00192     48
>DP00192     49
>DP00192     50
>DP00192     51
>DP00192     52
>DP00192     53
>DP00192     54
>DP00192     55
>DP00192     56
>DP00192     57
>DP00192     58
>DP00192     59
>DP00192     60
>DP00192     61
>DP00192     62
>DP00192     63
>DP00192     64
>DP00192     65
>DP00192     66
>DP00192     67
>DP00192     68
>DP00192     69
>DP00192     70
>DP00192     71
>DP00192     72
>DP00192     73
>DP00192     74
>DP00192     75
>DP00192     76
>DP00192     77
>DP00192     78
>DP00192     79
>DP00192     80
>DP00192     81
>DP00192     82
>DP00192     83
>DP00192     84
>DP00192     85
>DP00192     86
>DP00192     87
>DP00192     88
>DP00192     89
>DP00192     90
>DP00192     91
>DP00192     92
>DP00192     93
>DP00192     94
>DP00192     95
>DP00192     96
>DP00192     97
>DP00192     98
>DP00192     99
>DP00192     100
>DP00192     101
>DP00192     102
>DP00192     103
>DP00192     104
>DP00192     105
>DP00192     106
>DP00192     107
>DP00192     108
>DP00192     109
>DP00192     110
>DP00192     111
>DP00192     112
>DP00192     113
>DP00192     114
>DP00192     115
>DP00192     116
>DP00192     117
>DP00192     118
>DP00192     119
>DP00192     120
>DP00192     121
>DP00192     122
>DP00192     123
>DP00192     124
>DP00192     125
>DP00192     126
>DP00192     127
>DP00192     128
>DP00192     129
>DP00192     130
>DP00192     131
>DP00192     132
>DP00192     133
>DP00192     134
>DP00192     135
>DP00192     136
>DP00192     137
>DP00192     138
>DP00192     139
>DP00192     140
>DP00192     141
>DP00192     142
>DP00192     143
>DP00192     144
>DP00192     145
>DP00192     146
>DP00192     147
>DP00192     148
>DP00192     149
>DP00192     150
>DP00192     151
>DP00192     152
>DP00192     153
>DP00192     154
>DP00192     155
>DP00192     156
>DP00192     157
>DP00192     158
>DP00192     159
>DP00192     160
>DP00192     161
>DP00192     162
>DP00192     163
>DP00192     164
>DP00192     165
>DP00192     166
>DP00192     167
>DP00192     168
>DP00192     169
>DP00192     170
>DP00192     171
>DP00192     172
>DP00192     173
>DP00192     174
>DP00192     175
>DP00192     176
>DP00192     177
>DP00192     178
>DP00192     179
>DP00192     180
>DP00192     181
>DP00192     182
>DP00194     111
>DP00194     112
>DP00194     113
>DP00194     114
>DP00194     115
>DP00194     116
>DP00194     117
>DP00194     118
>DP00194     119
>DP00194     120
>DP00194     121
>DP00194     122
>DP00194     123
>DP00194     124
>DP00194     125
>DP00194     126
>DP00194     127
>DP00194     128
>DP00194     129
>DP00194     130
>DP00194     131
>DP00194     132
>DP00194     133
>DP00194     134
>DP00194     135
>DP00194     136
>DP00194     137
>DP00194     138
>DP00194     139
>DP00194     140
>DP00194     141
>DP00194     142
>DP00194     143
>DP00194     144
>DP00194     145
>DP00194     146
>DP00194     147
>DP00194     148
>DP00194     149
>DP00194     150
>DP00194     151
>DP00194     152
>DP00194     153
>DP00194     154
>DP00194     155
>DP00194     156
>DP00194     157
>DP00194     158
>DP00194     159
>DP00194     160
>DP00194     161
>DP00194     162
>DP00194     163
>DP00194     164
>DP00194     165
>DP00197     78
>DP00197     79
>DP00197     80
>DP00197     81
>DP00197     82
>DP00197     83
>DP00197     84
>DP00197     85
>DP00197     86
>DP00197     87
>DP00197     88
>DP00197     89
>DP00198     1
>DP00198     2
>DP00198     3
>DP00198     4
>DP00198     5
>DP00198     6
>DP00198     7
>DP00198     8
>DP00198     9
>DP00198     10
>DP00198     11
>DP00198     12
>DP00198     13
>DP00198     14
>DP00198     15
>DP00198     16
>DP00198     17
>DP00198     18
>DP00198     19
>DP00198     20
>DP00198     21
>DP00198     22
>DP00198     23
>DP00198     24
>DP00198     25
>DP00198     26
>DP00198     27
>DP00198     28
>DP00198     29
>DP00198     30
>DP00198     31
>DP00198     32
>DP00198     33
>DP00198     34
>DP00198     35
>DP00198     36
>DP00198     37
>DP00198     38
>DP00198     39
>DP00198     40
>DP00198     41
>DP00198     42
>DP00198     43
>DP00198     44
>DP00198     45
>DP00198     46
>DP00198     47
>DP00198     48
>DP00198     49
>DP00198     50
>DP00198     51
>DP00198     52
>DP00198     53
>DP00198     54
>DP00198     55
>DP00198     56
>DP00198     57
>DP00198     58
>DP00198     59
>DP00198     60
>DP00198     61
>DP00198     62
>DP00198     63
>DP00198     64
>DP00198     65
>DP00198     66
>DP00198     67
>DP00198     68
>DP00198     69
>DP00198     70
>DP00198     71
>DP00198     72
>DP00198     73
>DP00198     74
>DP00198     75
>DP00198     76
>DP00198     77
>DP00198     78
>DP00198     79
>DP00198     80
>DP00198     81
>DP00198     82
>DP00198     83
>DP00198     84
>DP00198     85
>DP00198     86
>DP00198     87
>DP00198     88
>DP00198     89
>DP00198     90
>DP00198     91
>DP00198     92
>DP00198     93
>DP00198     94
>DP00198     95
>DP00198     96
>DP00198     97
>DP00198     98
>DP00198     99
>DP00198     100
>DP00198     101
>DP00198     102
>DP00198     103
>DP00198     104
>DP00198     105
>DP00198     106
>DP00198     107
>DP00198     108
>DP00198     109
>DP00198     110
>DP00198     111
>DP00198     112
>DP00198     113
>DP00198     114
>DP00198     115
>DP00198     116
>DP00198     117
>DP00198     118
>DP00198     119
>DP00198     120
>DP00198     121
>DP00198     122
>DP00198     123
>DP00198     124
>DP00198     125
>DP00198     126
>DP00198     127
>DP00198     128
>DP00198     129
>DP00198     130
>DP00198     131
>DP00198     132
>DP00198     133
>DP00198     134
>DP00198     135
>DP00198     136
>DP00198     137
>DP00198     138
>DP00198     139
>DP00198     140
>DP00198     141
>DP00198     142
>DP00198     143
>DP00198     144
>DP00198     145
>DP00198     146
>DP00198     147
>DP00198     148
>DP00198     149
>DP00198     150
>DP00198     151
>DP00198     152
>DP00198     153
>DP00198     154
>DP00198     155
>DP00198     156
>DP00198     157
>DP00198     158
>DP00198     159
>DP00198     160
>DP00198     161
>DP00198     162
>DP00198     163
>DP00198     164
>DP00198     165
>DP00198     166
>DP00198     167
>DP00198     168
>DP00198     169
>DP00198     170
>DP00198     171
>DP00198     172
>DP00198     173
>DP00198     174
>DP00198     175
>DP00198     176
>DP00198     177
>DP00198     178
>DP00198     179
>DP00198     180
>DP00198     181
>DP00198     182
>DP00198     183
>DP00198     184
>DP00198     185
>DP00198     186
>DP00198     187
>DP00198     188
>DP00198     189
>DP00198     190
>DP00198     191
>DP00198     192
>DP00198     193
>DP00198     194
>DP00198     195
>DP00198     196
>DP00198     197
>DP00198     198
>DP00198     199
>DP00198     200
>DP00198     201
>DP00198     202
>DP00198     203
>DP00198     204
>DP00198     205
>DP00198     206
>DP00198     207
>DP00198     208
>DP00198     209
>DP00198     210
>DP00198     211
>DP00198     212
>DP00198     213
>DP00198     214
>DP00198     215
>DP00198     216
>DP00198     217
>DP00198     218
>DP00198     219
>DP00198     220
>DP00198     221
>DP00198     222
>DP00198     223
>DP00198     224
>DP00198     225
>DP00198     226
>DP00198     227
>DP00198     228
>DP00198     229
>DP00198     230
>DP00198     231
>DP00198     232
>DP00198     233
>DP00198     234
>DP00199     1
>DP00199     2
>DP00199     3
>DP00199     4
>DP00199     5
>DP00199     6
>DP00199     7
>DP00199     8
>DP00199     9
>DP00199     10
>DP00199     11
>DP00199     12
>DP00199     13
>DP00199     14
>DP00199     15
>DP00199     16
>DP00199     17
>DP00199     18
>DP00199     19
>DP00199     20
>DP00199     21
>DP00199     22
>DP00199     23
>DP00199     24
>DP00199     25
>DP00199     26
>DP00199     27
>DP00199     28
>DP00199     29
>DP00199     30
>DP00199     31
>DP00199     32
>DP00199     33
>DP00199     34
>DP00199     35
>DP00199     36
>DP00199     37
>DP00199     38
>DP00199     39
>DP00199     40
>DP00199     41
>DP00199     42
>DP00199     43
>DP00199     44
>DP00199     45
>DP00199     46
>DP00199     47
>DP00199     48
>DP00199     49
>DP00199     50
>DP00199     51
>DP00199     52
>DP00199     53
>DP00199     54
>DP00199     55
>DP00199     56
>DP00199     57
>DP00199     58
>DP00199     59
>DP00199     60
>DP00199     61
>DP00199     62
>DP00199     63
>DP00199     64
>DP00199     65
>DP00199     66
>DP00199     67
>DP00199     68
>DP00199     69
>DP00199     70
>DP00199     71
>DP00199     72
>DP00199     73
>DP00199     74
>DP00199     75
>DP00199     76
>DP00199     77
>DP00199     78
>DP00199     79
>DP00199     80
>DP00199     81
>DP00199     82
>DP00199     83
>DP00199     84
>DP00199     85
>DP00199     86
>DP00199     87
>DP00199     88
>DP00199     89
>DP00199     90
>DP00199     91
>DP00199     92
>DP00199     93
>DP00199     94
>DP00199     95
>DP00199     96
>DP00199     97
>DP00199     98
>DP00199     99
>DP00199     100
>DP00199     101
>DP00199     102
>DP00199     103
>DP00199     104
>DP00199     105
>DP00199     106
>DP00199     107
>DP00199     108
>DP00199     109
>DP00199     110
>DP00199     111
>DP00199     112
>DP00199     113
>DP00199     114
>DP00199     115
>DP00199     116
>DP00199     117
>DP00199     118
>DP00199     119
>DP00199     120
>DP00199     121
>DP00199     122
>DP00199     123
>DP00199     124
>DP00199     125
>DP00199     126
>DP00199     127
>DP00199     128
>DP00199     129
>DP00199     130
>DP00199     131
>DP00199     132
>DP00199     133
>DP00199     134
>DP00199     135
>DP00199     136
>DP00199     137
>DP00199     138
>DP00199     139
>DP00199     140
>DP00199     141
>DP00199     142
>DP00199     143
>DP00199     144
>DP00199     145
>DP00199     146
>DP00199     147
>DP00199     148
>DP00199     149
>DP00199     150
>DP00199     151
>DP00199     152
>DP00199     153
>DP00199     154
>DP00199     155
>DP00199     156
>DP00199     157
>DP00199     158
>DP00199     159
>DP00199     160
>DP00199     161
>DP00199     162
>DP00199     163
>DP00199     164
>DP00199     165
>DP00199     166
>DP00199     167
>DP00199     168
>DP00199     169
>DP00199     170
>DP00199     171
>DP00199     172
>DP00199     173
>DP00199     174
>DP00199     175
>DP00199     176
>DP00199     177
>DP00199     178
>DP00199     179
>DP00199     180
>DP00199     181
>DP00199     182
>DP00199     183
>DP00199     184
>DP00199     185
>DP00199     186
>DP00199     187
>DP00199     188
>DP00199     189
>DP00199     190
>DP00199     191
>DP00199     192
>DP00199     193
>DP00199     194
>DP00199     195
>DP00199     196
>DP00199     197
>DP00199     198
>DP00199     199
>DP00199     200
>DP00199     201
>DP00199     202
>DP00199     203
>DP00199     204
>DP00199     205
>DP00199     206
>DP00199     207
>DP00199     208
>DP00199     209
>DP00199     210
>DP00199     211
>DP00199     212
>DP00199     213
>DP00199     214
>DP00199     215
>DP00199     216
>DP00199     217
>DP00199     218
>DP00199     219
>DP00199     220
>DP00199     221
>DP00199     222
>DP00199     223
>DP00199     224
>DP00199     225
>DP00199     226
>DP00200     52
>DP00200     53
>DP00200     54
>DP00200     55
>DP00200     56
>DP00200     57
>DP00200     58
>DP00200     59
>DP00200     60
>DP00200     61
>DP00200     62
>DP00200     63
>DP00200     64
>DP00200     65
>DP00200     66
>DP00200     67
>DP00200     68
>DP00200     69
>DP00200     70
>DP00200     71
>DP00200     72
>DP00200     73
>DP00200     74
>DP00200     75
>DP00200     76
>DP00200     77
>DP00200     78
>DP00200     79
>DP00200     80
>DP00200     81
>DP00200     82
>DP00200     83
>DP00200     84
>DP00200     85
>DP00200     86
>DP00200     87
>DP00200     88
>DP00200     89
>DP00200     90
>DP00200     91
>DP00200     92
>DP00200     93
>DP00200     94
>DP00200     95
>DP00200     96
>DP00200     97
>DP00200     98
>DP00200     99
>DP00200     100
>DP00200     101
>DP00200     102
>DP00200     103
>DP00200     104
>DP00200     105
>DP00200     106
>DP00200     107
>DP00200     108
>DP00200     109
>DP00200     110
>DP00200     111
>DP00200     112
>DP00200     113
>DP00200     114
>DP00200     115
>DP00200     116
>DP00200     117
>DP00200     118
>DP00200     119
>DP00200     120
>DP00200     121
>DP00200     122
>DP00200     123
>DP00200     124
>DP00200     125
>DP00200     126
>DP00200     127
>DP00200     128
>DP00200     129
>DP00200     130
>DP00200     131
>DP00200     132
>DP00200     133
>DP00200     134
>DP00200     135
>DP00200     136
>DP00200     137
>DP00200     138
>DP00200     139
>DP00200     140
>DP00200     141
>DP00200     142
>DP00200     143
>DP00200     144
>DP00200     145
>DP00200     146
>DP00200     147
>DP00200     148
>DP00200     149
>DP00200     150
>DP00200     151
>DP00200     152
>DP00200     153
>DP00200     154
>DP00200     155
>DP00200     156
>DP00200     157
>DP00200     158
>DP00200     159
>DP00200     160
>DP00200     161
>DP00200     162
>DP00200     163
>DP00200     164
>DP00202     1
>DP00202     2
>DP00202     3
>DP00202     40
>DP00202     41
>DP00202     42
>DP00202     43
>DP00202     44
>DP00202     45
>DP00202     46
>DP00202     47
>DP00202     48
>DP00202     49
>DP00202     50
>DP00202     51
>DP00202     52
>DP00202     53
>DP00202     54
>DP00202     55
>DP00202     56
>DP00202     57
>DP00202     58
>DP00202     59
>DP00202     60
>DP00202     61
>DP00202     62
>DP00202     63
>DP00202     64
>DP00202     65
>DP00206     35
>DP00206     36
>DP00206     37
>DP00206     62
>DP00206     63
>DP00206     64
>DP00206     95
>DP00206     96
>DP00206     97
>DP00206     108
>DP00206     109
>DP00206     110
>DP00206     111
>DP00206     112
>DP00206     113
>DP00206     114
>DP00206     115
>DP00206     116
>DP00206     127
>DP00206     128
>DP00206     129
>DP00206     130
>DP00206     131
>DP00206     132
>DP00206     141
>DP00206     142
>DP00206     143
>DP00206     144
>DP00206     145
>DP00206     146
>DP00206     147
>DP00206     148
>DP00206     149
>DP00206     150
>DP00206     151
>DP00206     152
>DP00206     153
>DP00206     154
>DP00206     155
>DP00206     156
>DP00206     157
>DP00207     499
>DP00207     500
>DP00207     501
>DP00207     502
>DP00207     503
>DP00207     504
>DP00207     505
>DP00207     506
>DP00207     507
>DP00207     508
>DP00207     509
>DP00207     510
>DP00207     511
>DP00207     512
>DP00207     513
>DP00207     514
>DP00207     515
>DP00207     516
>DP00207     517
>DP00207     518
>DP00207     519
>DP00207     520
>DP00207     521
>DP00207     522
>DP00207     523
>DP00207     524
>DP00207     525
>DP00207     526
>DP00207     527
>DP00207     528
>DP00207     529
>DP00207     530
>DP00207     531
>DP00207     532
>DP00207     533
>DP00207     534
>DP00207     535
>DP00207     536
>DP00207     537
>DP00207     538
>DP00207     539
>DP00207     540
>DP00207     541
>DP00207     542
>DP00207     543
>DP00207     544
>DP00207     545
>DP00207     546
>DP00207     547
>DP00207     548
>DP00207     549
>DP00207     550
>DP00207     551
>DP00207     552
>DP00207     553
>DP00207     554
>DP00207     555
>DP00207     556
>DP00207     557
>DP00207     558
>DP00207     559
>DP00207     560
>DP00207     561
>DP00207     562
>DP00207     563
>DP00207     564
>DP00207     565
>DP00207     566
>DP00207     567
>DP00207     568
>DP00207     569
>DP00207     570
>DP00207     571
>DP00207     572
>DP00207     573
>DP00207     574
>DP00207     575
>DP00207     576
>DP00207     577
>DP00207     578
>DP00207     579
>DP00207     580
>DP00207     581
>DP00207     582
>DP00207     583
>DP00207     584
>DP00207     585
>DP00207     586
>DP00207     587
>DP00207     588
>DP00207     589
>DP00207     590
>DP00207     591
>DP00207     592
>DP00207     593
>DP00207     594
>DP00207     595
>DP00207     596
>DP00207     597
>DP00207     598
>DP00207     599
>DP00207     600
>DP00207     601
>DP00207     602
>DP00207     603
>DP00207     604
>DP00207     605
>DP00207     606
>DP00207     607
>DP00207     608
>DP00207     609
>DP00207     610
>DP00207     611
>DP00207     612
>DP00207     613
>DP00207     614
>DP00207     615
>DP00207     616
>DP00207     617
>DP00207     618
>DP00207     619
>DP00207     620
>DP00207     621
>DP00207     622
>DP00207     623
>DP00207     624
>DP00207     625
>DP00207     626
>DP00207     627
>DP00207     628
>DP00207     629
>DP00207     630
>DP00207     631
>DP00207     632
>DP00207     633
>DP00207     634
>DP00207     635
>DP00207     636
>DP00207     637
>DP00207     638
>DP00207     639
>DP00207     640
>DP00207     641
>DP00207     642
>DP00207     643
>DP00207     644
>DP00207     645
>DP00207     646
>DP00207     647
>DP00207     648
>DP00207     649
>DP00207     650
>DP00207     651
>DP00207     652
>DP00207     653
>DP00207     654
>DP00207     655
>DP00207     656
>DP00207     657
>DP00207     658
>DP00207     659
>DP00207     660
>DP00207     661
>DP00207     662
>DP00207     663
>DP00207     664
>DP00207     665
>DP00207     666
>DP00207     667
>DP00207     668
>DP00207     669
>DP00207     670
>DP00207     671
>DP00207     672
>DP00207     673
>DP00207     674
>DP00207     675
>DP00207     676
>DP00207     677
>DP00207     678
>DP00207     679
>DP00207     680
>DP00207     681
>DP00207     682
>DP00207     683
>DP00207     684
>DP00207     685
>DP00207     686
>DP00207     687
>DP00207     688
>DP00207     689
>DP00207     690
>DP00207     691
>DP00207     692
>DP00207     693
>DP00207     694
>DP00207     695
>DP00207     696
>DP00207     697
>DP00207     698
>DP00207     699
>DP00207     700
>DP00207     701
>DP00207     702
>DP00207     703
>DP00207     704
>DP00207     705
>DP00207     706
>DP00207     707
>DP00207     708
>DP00207     709
>DP00207     710
>DP00207     711
>DP00207     712
>DP00207     713
>DP00207     714
>DP00207     715
>DP00207     716
>DP00207     717
>DP00207     718
>DP00207     719
>DP00207     720
>DP00207     721
>DP00207     722
>DP00207     723
>DP00207     724
>DP00207     725
>DP00207     726
>DP00207     727
>DP00207     728
>DP00207     729
>DP00207     730
>DP00207     731
>DP00207     732
>DP00207     733
>DP00207     734
>DP00207     735
>DP00207     736
>DP00207     737
>DP00207     738
>DP00207     739
>DP00207     740
>DP00207     741
>DP00207     742
>DP00207     743
>DP00207     744
>DP00207     745
>DP00207     746
>DP00207     747
>DP00207     748
>DP00207     749
>DP00207     750
>DP00207     751
>DP00207     752
>DP00207     753
>DP00207     754
>DP00207     755
>DP00207     756
>DP00207     757
>DP00207     758
>DP00207     759
>DP00207     760
>DP00207     761
>DP00207     762
>DP00207     763
>DP00207     764
>DP00207     765
>DP00207     766
>DP00207     767
>DP00207     768
>DP00207     769
>DP00207     770
>DP00207     771
>DP00207     772
>DP00207     773
>DP00207     774
>DP00207     775
>DP00207     776
>DP00207     777
>DP00207     778
>DP00207     779
>DP00207     780
>DP00207     781
>DP00207     782
>DP00207     783
>DP00207     784
>DP00207     785
>DP00207     786
>DP00207     787
>DP00207     788
>DP00207     789
>DP00207     790
>DP00207     791
>DP00207     792
>DP00207     793
>DP00207     794
>DP00207     795
>DP00207     796
>DP00207     797
>DP00207     798
>DP00207     799
>DP00207     800
>DP00207     801
>DP00207     802
>DP00207     803
>DP00207     804
>DP00207     805
>DP00207     806
>DP00207     807
>DP00207     808
>DP00207     809
>DP00207     810
>DP00207     811
>DP00207     812
>DP00207     813
>DP00207     814
>DP00207     815
>DP00207     816
>DP00207     817
>DP00207     818
>DP00207     819
>DP00207     820
>DP00207     821
>DP00207     822
>DP00207     823
>DP00207     824
>DP00207     825
>DP00207     826
>DP00207     827
>DP00207     828
>DP00207     829
>DP00207     830
>DP00207     831
>DP00207     832
>DP00207     833
>DP00207     834
>DP00207     835
>DP00207     836
>DP00207     837
>DP00207     838
>DP00207     839
>DP00207     840
>DP00207     841
>DP00207     842
>DP00207     843
>DP00207     844
>DP00207     845
>DP00207     846
>DP00207     847
>DP00207     848
>DP00207     849
>DP00207     850
>DP00207     851
>DP00207     852
>DP00207     853
>DP00207     854
>DP00207     855
>DP00207     856
>DP00207     857
>DP00207     858
>DP00207     859
>DP00207     860
>DP00207     861
>DP00207     862
>DP00207     863
>DP00207     864
>DP00207     865
>DP00207     866
>DP00207     867
>DP00207     868
>DP00207     869
>DP00207     870
>DP00207     871
>DP00207     872
>DP00207     873
>DP00207     874
>DP00207     875
>DP00207     876
>DP00207     877
>DP00207     878
>DP00207     879
>DP00207     880
>DP00207     881
>DP00207     882
>DP00207     883
>DP00207     884
>DP00207     885
>DP00207     886
>DP00207     887
>DP00207     888
>DP00207     889
>DP00207     890
>DP00207     891
>DP00207     892
>DP00207     893
>DP00207     894
>DP00207     895
>DP00207     896
>DP00207     897
>DP00207     898
>DP00207     899
>DP00207     900
>DP00207     901
>DP00207     902
>DP00207     903
>DP00207     904
>DP00207     905
>DP00207     906
>DP00207     907
>DP00207     908
>DP00207     909
>DP00207     910
>DP00207     911
>DP00207     912
>DP00207     913
>DP00207     914
>DP00207     915
>DP00207     916
>DP00207     917
>DP00207     918
>DP00207     919
>DP00207     920
>DP00207     921
>DP00207     922
>DP00207     923
>DP00207     924
>DP00207     925
>DP00207     926
>DP00207     927
>DP00207     928
>DP00207     929
>DP00207     930
>DP00207     931
>DP00207     932
>DP00207     933
>DP00207     934
>DP00207     935
>DP00207     936
>DP00207     937
>DP00207     938
>DP00207     939
>DP00207     940
>DP00207     941
>DP00207     942
>DP00207     943
>DP00207     944
>DP00207     945
>DP00207     946
>DP00207     947
>DP00207     948
>DP00207     949
>DP00207     950
>DP00207     951
>DP00207     952
>DP00207     953
>DP00207     954
>DP00207     955
>DP00207     956
>DP00207     957
>DP00207     958
>DP00207     959
>DP00207     960
>DP00207     961
>DP00207     962
>DP00207     963
>DP00207     964
>DP00207     965
>DP00207     966
>DP00207     967
>DP00207     968
>DP00207     969
>DP00207     970
>DP00207     971
>DP00207     972
>DP00207     973
>DP00207     974
>DP00207     975
>DP00207     976
>DP00207     977
>DP00207     978
>DP00207     979
>DP00207     980
>DP00207     981
>DP00207     982
>DP00207     983
>DP00207     984
>DP00207     985
>DP00207     986
>DP00207     987
>DP00207     988
>DP00207     989
>DP00207     990
>DP00207     991
>DP00207     992
>DP00207     993
>DP00207     994
>DP00207     995
>DP00207     996
>DP00207     997
>DP00207     998
>DP00207     999
>DP00207     1000
>DP00207     1001
>DP00207     1002
>DP00207     1003
>DP00207     1004
>DP00207     1005
>DP00207     1006
>DP00207     1007
>DP00207     1008
>DP00207     1009
>DP00207     1010
>DP00207     1011
>DP00207     1012
>DP00207     1013
>DP00207     1014
>DP00207     1015
>DP00207     1016
>DP00207     1017
>DP00207     1018
>DP00207     1019
>DP00207     1020
>DP00207     1021
>DP00207     1022
>DP00207     1023
>DP00207     1024
>DP00207     1025
>DP00207     1026
>DP00207     1027
>DP00207     1028
>DP00207     1029
>DP00207     1030
>DP00207     1031
>DP00207     1032
>DP00207     1033
>DP00207     1034
>DP00207     1035
>DP00207     1036
>DP00207     1037
>DP00207     1038
>DP00207     1039
>DP00207     1040
>DP00207     1041
>DP00207     1042
>DP00207     1043
>DP00207     1044
>DP00207     1045
>DP00207     1046
>DP00207     1047
>DP00207     1048
>DP00207     1049
>DP00207     1050
>DP00207     1051
>DP00207     1052
>DP00207     1053
>DP00207     1054
>DP00207     1055
>DP00207     1056
>DP00207     1057
>DP00207     1058
>DP00207     1059
>DP00207     1060
>DP00207     1061
>DP00208     162
>DP00208     163
>DP00208     164
>DP00208     165
>DP00208     166
>DP00208     167
>DP00208     168
>DP00208     169
>DP00208     170
>DP00208     171
>DP00208     172
>DP00208     173
>DP00208     174
>DP00210     58
>DP00210     59
>DP00210     153
>DP00210     154
>DP00210     155
>DP00210     156
>DP00210     157
>DP00210     158
>DP00210     159
>DP00214     1
>DP00214     2
>DP00214     3
>DP00214     4
>DP00214     5
>DP00214     6
>DP00214     7
>DP00214     8
>DP00214     9
>DP00214     10
>DP00214     11
>DP00214     12
>DP00214     13
>DP00214     14
>DP00214     15
>DP00214     16
>DP00214     17
>DP00214     18
>DP00214     19
>DP00214     20
>DP00214     21
>DP00214     22
>DP00214     23
>DP00214     24
>DP00214     25
>DP00214     26
>DP00214     27
>DP00214     28
>DP00214     29
>DP00214     30
>DP00214     31
>DP00214     32
>DP00214     33
>DP00214     34
>DP00214     35
>DP00214     36
>DP00214     37
>DP00214     38
>DP00214     39
>DP00214     40
>DP00214     41
>DP00214     42
>DP00214     43
>DP00214     44
>DP00214     45
>DP00214     46
>DP00214     47
>DP00214     48
>DP00214     49
>DP00214     50
>DP00214     51
>DP00214     52
>DP00214     53
>DP00214     54
>DP00214     55
>DP00214     56
>DP00214     57
>DP00214     58
>DP00214     59
>DP00214     60
>DP00214     61
>DP00214     62
>DP00214     63
>DP00214     64
>DP00214     65
>DP00214     66
>DP00214     67
>DP00214     68
>DP00214     69
>DP00214     70
>DP00214     71
>DP00214     72
>DP00214     73
>DP00214     74
>DP00214     75
>DP00214     76
>DP00214     77
>DP00214     78
>DP00214     79
>DP00214     80
>DP00214     81
>DP00214     82
>DP00214     83
>DP00214     84
>DP00214     85
>DP00214     86
>DP00214     87
>DP00214     88
>DP00214     89
>DP00214     90
>DP00214     91
>DP00214     92
>DP00214     93
>DP00214     94
>DP00214     95
>DP00214     96
>DP00214     97
>DP00214     98
>DP00214     99
>DP00214     100
>DP00214     101
>DP00214     102
>DP00214     103
>DP00214     104
>DP00214     105
>DP00214     106
>DP00214     107
>DP00214     108
>DP00214     109
>DP00214     110
>DP00214     111
>DP00214     112
>DP00214     113
>DP00214     114
>DP00214     115
>DP00214     116
>DP00214     117
>DP00214     118
>DP00214     119
>DP00214     120
>DP00214     121
>DP00214     122
>DP00214     123
>DP00214     124
>DP00214     125
>DP00214     126
>DP00214     127
>DP00214     128
>DP00214     129
>DP00214     130
>DP00214     131
>DP00214     132
>DP00214     133
>DP00214     134
>DP00214     135
>DP00214     136
>DP00214     137
>DP00214     138
>DP00214     139
>DP00214     140
>DP00214     141
>DP00214     142
>DP00214     143
>DP00214     144
>DP00214     145
>DP00214     146
>DP00214     147
>DP00214     148
>DP00214     149
>DP00214     150
>DP00214     151
>DP00214     152
>DP00214     153
>DP00214     154
>DP00214     155
>DP00214     156
>DP00214     157
>DP00214     158
>DP00214     159
>DP00214     160
>DP00214     161
>DP00214     162
>DP00214     163
>DP00214     164
>DP00214     165
>DP00214     166
>DP00214     167
>DP00214     168
>DP00214     169
>DP00214     170
>DP00214     171
>DP00214     172
>DP00214     173
>DP00214     174
>DP00214     175
>DP00214     176
>DP00214     177
>DP00214     178
>DP00214     179
>DP00214     180
>DP00214     181
>DP00214     182
>DP00214     183
>DP00214     184
>DP00214     185
>DP00214     186
>DP00214     187
>DP00214     188
>DP00214     189
>DP00214     190
>DP00214     191
>DP00214     192
>DP00214     193
>DP00214     194
>DP00214     195
>DP00214     196
>DP00214     197
>DP00214     198
>DP00214     199
>DP00214     200
>DP00214     201
>DP00214     202
>DP00214     203
>DP00214     204
>DP00214     205
>DP00214     206
>DP00214     207
>DP00214     208
>DP00214     209
>DP00214     210
>DP00214     211
>DP00214     212
>DP00214     213
>DP00214     214
>DP00214     215
>DP00214     216
>DP00214     217
>DP00214     218
>DP00214     219
>DP00214     220
>DP00214     221
>DP00214     222
>DP00214     223
>DP00214     224
>DP00214     225
>DP00214     226
>DP00214     227
>DP00214     228
>DP00214     229
>DP00214     230
>DP00214     231
>DP00214     232
>DP00214     233
>DP00214     234
>DP00214     235
>DP00214     236
>DP00214     237
>DP00214     238
>DP00214     239
>DP00214     240
>DP00214     241
>DP00214     242
>DP00214     243
>DP00214     244
>DP00214     245
>DP00214     246
>DP00214     247
>DP00214     248
>DP00214     249
>DP00214     250
>DP00214     251
>DP00214     252
>DP00214     253
>DP00214     254
>DP00214     255
>DP00214     256
>DP00214     257
>DP00214     258
>DP00214     259
>DP00214     260
>DP00214     261
>DP00214     262
>DP00214     263
>DP00214     264
>DP00214     265
>DP00214     266
>DP00214     267
>DP00214     268
>DP00214     269
>DP00214     270
>DP00214     271
>DP00214     272
>DP00214     273
>DP00214     274
>DP00214     275
>DP00214     276
>DP00214     277
>DP00214     278
>DP00214     279
>DP00214     280
>DP00214     281
>DP00214     282
>DP00214     283
>DP00214     284
>DP00214     285
>DP00214     286
>DP00214     287
>DP00214     288
>DP00214     289
>DP00214     290
>DP00214     291
>DP00214     292
>DP00214     293
>DP00214     294
>DP00214     295
>DP00214     296
>DP00214     297
>DP00214     298
>DP00214     299
>DP00214     300
>DP00214     301
>DP00214     302
>DP00214     303
>DP00214     304
>DP00214     305
>DP00214     306
>DP00214     307
>DP00214     308
>DP00214     309
>DP00214     310
>DP00214     311
>DP00214     312
>DP00214     313
>DP00214     314
>DP00215     230
>DP00215     231
>DP00215     232
>DP00215     233
>DP00215     234
>DP00215     235
>DP00215     236
>DP00215     237
>DP00215     238
>DP00215     239
>DP00215     240
>DP00215     241
>DP00215     242
>DP00215     243
>DP00215     244
>DP00215     245
>DP00215     246
>DP00215     247
>DP00215     248
>DP00215     249
>DP00215     480
>DP00215     481
>DP00215     482
>DP00215     483
>DP00215     484
>DP00215     485
>DP00215     486
>DP00215     487
>DP00215     488
>DP00215     489
>DP00215     490
>DP00215     491
>DP00215     492
>DP00216     1
>DP00216     2
>DP00216     3
>DP00216     4
>DP00216     5
>DP00216     6
>DP00216     7
>DP00216     8
>DP00216     9
>DP00216     10
>DP00216     11
>DP00216     12
>DP00216     13
>DP00216     14
>DP00216     15
>DP00216     16
>DP00216     17
>DP00216     18
>DP00216     19
>DP00216     20
>DP00216     21
>DP00216     22
>DP00216     23
>DP00216     24
>DP00216     25
>DP00216     26
>DP00216     27
>DP00216     28
>DP00216     29
>DP00216     30
>DP00216     31
>DP00216     32
>DP00216     33
>DP00216     34
>DP00216     35
>DP00216     36
>DP00216     37
>DP00216     38
>DP00216     39
>DP00216     40
>DP00216     41
>DP00216     42
>DP00216     43
>DP00216     44
>DP00216     45
>DP00216     46
>DP00216     47
>DP00216     48
>DP00216     49
>DP00216     50
>DP00216     51
>DP00216     52
>DP00216     53
>DP00216     54
>DP00216     55
>DP00216     56
>DP00216     57
>DP00216     58
>DP00216     59
>DP00216     60
>DP00216     61
>DP00216     62
>DP00216     63
>DP00216     64
>DP00216     65
>DP00217     120
>DP00217     121
>DP00217     122
>DP00217     123
>DP00217     124
>DP00217     125
>DP00217     126
>DP00217     127
>DP00217     128
>DP00217     129
>DP00217     130
>DP00217     131
>DP00217     132
>DP00217     133
>DP00217     134
>DP00217     135
>DP00217     136
>DP00217     137
>DP00217     138
>DP00217     139
>DP00217     140
>DP00217     141
>DP00217     142
>DP00217     143
>DP00217     144
>DP00217     145
>DP00217     146
>DP00217     147
>DP00217     148
>DP00217     149
>DP00217     150
>DP00217     151
>DP00217     152
>DP00217     153
>DP00217     154
>DP00217     155
>DP00217     156
>DP00217     157
>DP00217     158
>DP00217     159
>DP00217     160
>DP00217     161
>DP00217     162
>DP00217     163
>DP00217     164
>DP00217     165
>DP00217     166
>DP00217     167
>DP00217     168
>DP00217     169
>DP00217     170
>DP00217     171
>DP00217     172
>DP00217     173
>DP00217     174
>DP00217     175
>DP00217     176
>DP00217     177
>DP00217     178
>DP00217     179
>DP00217     180
>DP00217     181
>DP00217     182
>DP00217     183
>DP00217     184
>DP00217     185
>DP00217     186
>DP00217     187
>DP00217     188
>DP00217     189
>DP00217     190
>DP00217     191
>DP00217     192
>DP00217     193
>DP00217     194
>DP00217     195
>DP00217     196
>DP00217     197
>DP00217     198
>DP00217     199
>DP00217     200
>DP00219     1
>DP00219     2
>DP00219     3
>DP00219     4
>DP00219     5
>DP00219     6
>DP00219     7
>DP00219     8
>DP00219     9
>DP00219     10
>DP00219     11
>DP00219     12
>DP00219     13
>DP00219     14
>DP00219     15
>DP00219     16
>DP00219     17
>DP00219     18
>DP00219     19
>DP00219     20
>DP00219     21
>DP00219     22
>DP00219     23
>DP00219     24
>DP00219     25
>DP00219     26
>DP00219     27
>DP00219     28
>DP00219     29
>DP00219     30
>DP00219     31
>DP00219     32
>DP00219     33
>DP00219     34
>DP00219     35
>DP00219     36
>DP00219     37
>DP00219     38
>DP00219     39
>DP00219     40
>DP00219     41
>DP00219     42
>DP00219     43
>DP00219     44
>DP00219     45
>DP00219     46
>DP00219     47
>DP00219     48
>DP00219     49
>DP00219     50
>DP00219     51
>DP00219     52
>DP00219     53
>DP00219     54
>DP00219     55
>DP00219     56
>DP00219     57
>DP00219     58
>DP00219     59
>DP00219     60
>DP00219     61
>DP00219     62
>DP00219     63
>DP00219     64
>DP00219     65
>DP00219     66
>DP00219     67
>DP00219     68
>DP00219     69
>DP00219     70
>DP00219     71
>DP00219     72
>DP00219     73
>DP00219     74
>DP00219     75
>DP00219     76
>DP00219     77
>DP00219     78
>DP00219     79
>DP00219     80
>DP00219     81
>DP00219     82
>DP00219     83
>DP00219     84
>DP00219     85
>DP00219     86
>DP00219     87
>DP00219     88
>DP00219     89
>DP00219     90
>DP00219     91
>DP00219     92
>DP00219     93
>DP00219     94
>DP00219     95
>DP00219     96
>DP00219     97
>DP00219     98
>DP00219     99
>DP00219     100
>DP00219     101
>DP00219     102
>DP00219     103
>DP00219     104
>DP00219     105
>DP00219     106
>DP00219     107
>DP00219     108
>DP00219     109
>DP00219     110
>DP00219     111
>DP00219     112
>DP00219     113
>DP00219     114
>DP00219     115
>DP00219     116
>DP00219     117
>DP00219     118
>DP00219     119
>DP00219     120
>DP00219     121
>DP00219     122
>DP00219     123
>DP00219     124
>DP00219     125
>DP00219     126
>DP00221     196
>DP00221     197
>DP00221     198
>DP00221     199
>DP00221     200
>DP00221     201
>DP00221     202
>DP00221     203
>DP00221     204
>DP00221     205
>DP00221     206
>DP00221     207
>DP00221     208
>DP00221     209
>DP00221     210
>DP00221     211
>DP00221     212
>DP00221     213
>DP00221     214
>DP00221     215
>DP00221     216
>DP00221     217
>DP00221     218
>DP00221     219
>DP00221     220
>DP00221     221
>DP00221     222
>DP00221     223
>DP00221     224
>DP00221     225
>DP00221     336
>DP00221     337
>DP00221     338
>DP00221     339
>DP00221     340
>DP00221     341
>DP00221     342
>DP00221     343
>DP00221     344
>DP00221     345
>DP00221     346
>DP00221     347
>DP00221     348
>DP00221     349
>DP00221     350
>DP00221     351
>DP00221     352
>DP00221     353
>DP00221     354
>DP00221     355
>DP00221     356
>DP00221     357
>DP00221     358
>DP00221     359
>DP00221     360
>DP00221     361
>DP00221     362
>DP00221     363
>DP00221     364
>DP00221     365
>DP00222     1
>DP00222     2
>DP00222     3
>DP00222     4
>DP00222     5
>DP00222     6
>DP00222     7
>DP00222     8
>DP00222     9
>DP00222     10
>DP00222     11
>DP00222     12
>DP00222     13
>DP00222     14
>DP00222     15
>DP00222     16
>DP00222     17
>DP00222     18
>DP00222     19
>DP00222     20
>DP00222     21
>DP00222     22
>DP00222     23
>DP00222     24
>DP00222     25
>DP00222     26
>DP00222     27
>DP00222     28
>DP00222     29
>DP00222     30
>DP00222     31
>DP00222     32
>DP00222     33
>DP00222     34
>DP00222     35
>DP00222     36
>DP00222     37
>DP00222     38
>DP00222     39
>DP00222     40
>DP00222     41
>DP00222     42
>DP00222     43
>DP00222     44
>DP00222     45
>DP00222     46
>DP00222     47
>DP00222     48
>DP00222     49
>DP00222     50
>DP00222     51
>DP00222     52
>DP00222     53
>DP00222     54
>DP00222     55
>DP00222     56
>DP00222     57
>DP00222     58
>DP00222     59
>DP00222     60
>DP00222     61
>DP00222     62
>DP00222     63
>DP00222     64
>DP00222     65
>DP00222     66
>DP00222     67
>DP00222     68
>DP00222     69
>DP00222     70
>DP00222     71
>DP00222     72
>DP00222     73
>DP00222     74
>DP00222     75
>DP00222     76
>DP00222     77
>DP00222     78
>DP00222     79
>DP00222     80
>DP00222     81
>DP00222     82
>DP00222     83
>DP00222     84
>DP00222     85
>DP00222     86
>DP00222     87
>DP00222     88
>DP00222     89
>DP00222     90
>DP00222     91
>DP00222     92
>DP00222     93
>DP00222     94
>DP00222     95
>DP00222     96
>DP00222     97
>DP00222     98
>DP00222     99
>DP00222     100
>DP00222     101
>DP00222     102
>DP00222     103
>DP00222     104
>DP00222     105
>DP00222     106
>DP00222     107
>DP00222     108
>DP00222     109
>DP00222     110
>DP00222     111
>DP00222     112
>DP00222     113
>DP00222     114
>DP00222     115
>DP00222     116
>DP00222     117
>DP00222     118
>DP00222     119
>DP00222     120
>DP00222     121
>DP00222     122
>DP00222     123
>DP00222     124
>DP00222     125
>DP00222     126
>DP00222     127
>DP00222     128
>DP00222     129
>DP00222     130
>DP00222     131
>DP00222     132
>DP00222     133
>DP00222     134
>DP00222     135
>DP00222     136
>DP00222     137
>DP00222     138
>DP00222     139
>DP00222     140
>DP00222     141
>DP00222     142
>DP00222     143
>DP00222     144
>DP00222     145
>DP00222     146
>DP00222     147
>DP00222     148
>DP00222     149
>DP00222     150
>DP00222     151
>DP00222     152
>DP00222     153
>DP00222     154
>DP00222     155
>DP00222     156
>DP00222     157
>DP00222     158
>DP00222     159
>DP00222     160
>DP00222     161
>DP00222     162
>DP00222     163
>DP00222     164
>DP00222     165
>DP00222     166
>DP00222     167
>DP00222     168
>DP00222     169
>DP00222     170
>DP00222     171
>DP00222     172
>DP00222     173
>DP00222     174
>DP00222     175
>DP00222     176
>DP00222     177
>DP00222     178
>DP00222     179
>DP00222     180
>DP00222     181
>DP00222     182
>DP00222     183
>DP00222     184
>DP00222     185
>DP00222     186
>DP00222     187
>DP00222     188
>DP00222     189
>DP00222     190
>DP00222     191
>DP00222     192
>DP00222     193
>DP00222     194
>DP00222     195
>DP00222     196
>DP00222     197
>DP00222     198
>DP00222     199
>DP00222     200
>DP00222     201
>DP00222     202
>DP00222     203
>DP00222     204
>DP00222     205
>DP00222     206
>DP00222     207
>DP00222     208
>DP00222     209
>DP00222     210
>DP00222     211
>DP00222     212
>DP00222     213
>DP00222     214
>DP00222     215
>DP00222     216
>DP00222     217
>DP00222     218
>DP00222     219
>DP00222     220
>DP00222     221
>DP00222     222
>DP00222     223
>DP00222     224
>DP00222     225
>DP00222     226
>DP00222     227
>DP00222     228
>DP00222     229
>DP00222     230
>DP00222     231
>DP00222     232
>DP00222     233
>DP00222     234
>DP00222     235
>DP00222     236
>DP00222     237
>DP00222     238
>DP00222     239
>DP00222     240
>DP00222     241
>DP00222     242
>DP00222     243
>DP00222     244
>DP00222     245
>DP00222     246
>DP00222     247
>DP00222     248
>DP00222     249
>DP00222     250
>DP00222     251
>DP00222     252
>DP00222     253
>DP00222     254
>DP00222     255
>DP00222     256
>DP00222     257
>DP00222     258
>DP00222     259
>DP00222     260
>DP00222     261
>DP00222     262
>DP00222     263
>DP00222     264
>DP00222     265
>DP00222     266
>DP00222     267
>DP00222     268
>DP00222     269
>DP00222     270
>DP00222     271
>DP00222     272
>DP00222     273
>DP00222     274
>DP00222     275
>DP00222     276
>DP00222     277
>DP00222     278
>DP00222     279
>DP00222     280
>DP00222     281
>DP00222     282
>DP00222     283
>DP00222     284
>DP00222     285
>DP00222     286
>DP00222     287
>DP00222     288
>DP00222     289
>DP00222     290
>DP00222     291
>DP00222     292
>DP00222     293
>DP00222     294
>DP00222     295
>DP00222     296
>DP00222     297
>DP00222     298
>DP00222     299
>DP00222     300
>DP00222     301
>DP00222     302
>DP00222     303
>DP00222     304
>DP00222     305
>DP00222     306
>DP00222     307
>DP00222     308
>DP00222     309
>DP00222     310
>DP00222     311
>DP00222     312
>DP00222     313
>DP00222     314
>DP00222     315
>DP00222     316
>DP00222     317
>DP00222     318
>DP00222     319
>DP00222     320
>DP00222     321
>DP00222     322
>DP00222     323
>DP00222     324
>DP00222     325
>DP00222     326
>DP00222     327
>DP00222     328
>DP00222     329
>DP00222     330
>DP00222     331
>DP00222     332
>DP00222     333
>DP00222     334
>DP00222     335
>DP00222     336
>DP00222     337
>DP00222     338
>DP00222     339
>DP00222     340
>DP00222     341
>DP00222     342
>DP00222     343
>DP00222     344
>DP00222     345
>DP00222     346
>DP00222     347
>DP00222     348
>DP00222     349
>DP00222     350
>DP00222     351
>DP00222     352
>DP00222     353
>DP00222     354
>DP00222     355
>DP00222     356
>DP00222     357
>DP00222     358
>DP00222     359
>DP00222     360
>DP00222     361
>DP00222     362
>DP00222     363
>DP00222     364
>DP00222     365
>DP00222     366
>DP00222     367
>DP00222     368
>DP00222     369
>DP00222     370
>DP00222     371
>DP00222     372
>DP00222     373
>DP00222     374
>DP00222     375
>DP00222     376
>DP00222     377
>DP00222     378
>DP00222     379
>DP00222     380
>DP00222     381
>DP00222     382
>DP00222     383
>DP00222     384
>DP00222     385
>DP00222     386
>DP00222     387
>DP00222     388
>DP00222     389
>DP00222     390
>DP00222     391
>DP00222     392
>DP00222     393
>DP00222     394
>DP00222     395
>DP00222     396
>DP00222     397
>DP00222     398
>DP00222     399
>DP00222     400
>DP00222     401
>DP00222     402
>DP00222     403
>DP00222     404
>DP00222     405
>DP00222     406
>DP00222     407
>DP00222     408
>DP00222     409
>DP00222     410
>DP00222     411
>DP00222     412
>DP00222     413
>DP00222     414
>DP00222     415
>DP00222     416
>DP00222     417
>DP00222     418
>DP00222     419
>DP00222     420
>DP00222     421
>DP00222     422
>DP00222     423
>DP00222     424
>DP00222     425
>DP00222     426
>DP00222     427
>DP00222     428
>DP00222     429
>DP00222     430
>DP00222     431
>DP00222     432
>DP00222     433
>DP00222     434
>DP00222     435
>DP00222     436
>DP00222     437
>DP00222     438
>DP00222     439
>DP00222     440
>DP00222     441
>DP00222     442
>DP00222     443
>DP00222     444
>DP00222     445
>DP00222     446
>DP00222     447
>DP00222     448
>DP00222     449
>DP00222     450
>DP00222     451
>DP00222     452
>DP00222     453
>DP00222     454
>DP00222     455
>DP00222     456
>DP00222     457
>DP00222     458
>DP00222     459
>DP00222     460
>DP00222     461
>DP00222     462
>DP00222     463
>DP00222     464
>DP00222     465
>DP00222     466
>DP00222     467
>DP00222     468
>DP00222     469
>DP00222     470
>DP00222     471
>DP00222     472
>DP00222     473
>DP00222     474
>DP00222     475
>DP00222     476
>DP00222     477
>DP00222     478
>DP00222     479
>DP00222     480
>DP00222     481
>DP00222     482
>DP00222     483
>DP00222     484
>DP00222     485
>DP00222     486
>DP00222     487
>DP00222     488
>DP00222     489
>DP00222     490
>DP00222     491
>DP00222     492
>DP00222     493
>DP00222     494
>DP00222     495
>DP00222     496
>DP00222     497
>DP00222     498
>DP00222     499
>DP00222     500
>DP00222     501
>DP00222     502
>DP00222     503
>DP00222     504
>DP00222     505
>DP00222     506
>DP00222     507
>DP00222     508
>DP00222     509
>DP00222     510
>DP00222     511
>DP00222     512
>DP00222     513
>DP00222     514
>DP00222     515
>DP00222     516
>DP00222     517
>DP00222     518
>DP00222     519
>DP00222     520
>DP00222     521
>DP00222     522
>DP00222     523
>DP00222     524
>DP00222     525
>DP00222     526
>DP00222     527
>DP00222     528
>DP00222     529
>DP00222     530
>DP00222     531
>DP00222     532
>DP00222     533
>DP00222     534
>DP00222     535
>DP00222     536
>DP00222     537
>DP00222     538
>DP00222     539
>DP00222     540
>DP00222     541
>DP00222     542
>DP00222     543
>DP00222     544
>DP00222     545
>DP00222     546
>DP00222     547
>DP00222     548
>DP00222     549
>DP00222     550
>DP00222     551
>DP00222     552
>DP00222     553
>DP00222     554
>DP00222     555
>DP00222     556
>DP00222     557
>DP00222     558
>DP00222     559
>DP00222     560
>DP00222     561
>DP00222     562
>DP00222     563
>DP00222     564
>DP00222     565
>DP00222     566
>DP00222     567
>DP00222     568
>DP00222     569
>DP00222     570
>DP00222     571
>DP00222     572
>DP00222     573
>DP00222     574
>DP00222     575
>DP00222     576
>DP00222     577
>DP00222     578
>DP00222     579
>DP00222     580
>DP00222     581
>DP00222     582
>DP00222     583
>DP00222     584
>DP00222     585
>DP00222     586
>DP00222     587
>DP00222     588
>DP00222     589
>DP00222     590
>DP00222     591
>DP00222     592
>DP00222     593
>DP00222     594
>DP00222     595
>DP00222     596
>DP00222     597
>DP00222     598
>DP00222     599
>DP00222     600
>DP00222     601
>DP00222     602
>DP00222     603
>DP00222     604
>DP00222     605
>DP00222     606
>DP00222     607
>DP00222     608
>DP00222     609
>DP00222     610
>DP00222     611
>DP00222     612
>DP00222     613
>DP00222     614
>DP00222     615
>DP00222     616
>DP00222     617
>DP00222     618
>DP00222     619
>DP00222     620
>DP00222     621
>DP00222     622
>DP00222     623
>DP00222     624
>DP00222     625
>DP00222     626
>DP00222     627
>DP00222     628
>DP00222     629
>DP00222     630
>DP00222     631
>DP00222     632
>DP00222     633
>DP00222     634
>DP00222     635
>DP00222     636
>DP00222     637
>DP00222     638
>DP00222     639
>DP00222     640
>DP00222     641
>DP00222     642
>DP00222     643
>DP00222     644
>DP00222     645
>DP00222     646
>DP00222     647
>DP00222     648
>DP00222     649
>DP00222     650
>DP00222     651
>DP00222     652
>DP00222     653
>DP00222     654
>DP00222     655
>DP00222     656
>DP00222     657
>DP00222     658
>DP00222     659
>DP00222     660
>DP00222     661
>DP00222     662
>DP00222     663
>DP00222     664
>DP00222     665
>DP00222     666
>DP00222     667
>DP00222     668
>DP00222     669
>DP00222     670
>DP00222     671
>DP00222     672
>DP00222     673
>DP00222     674
>DP00222     675
>DP00222     676
>DP00222     677
>DP00222     678
>DP00222     679
>DP00222     680
>DP00222     681
>DP00222     682
>DP00222     683
>DP00222     684
>DP00222     685
>DP00222     686
>DP00222     687
>DP00222     688
>DP00222     689
>DP00222     690
>DP00222     691
>DP00222     692
>DP00222     693
>DP00222     694
>DP00222     695
>DP00222     696
>DP00222     697
>DP00222     698
>DP00222     699
>DP00222     700
>DP00222     701
>DP00222     702
>DP00222     703
>DP00222     704
>DP00222     705
>DP00222     706
>DP00222     707
>DP00222     708
>DP00222     709
>DP00222     710
>DP00222     711
>DP00222     712
>DP00222     713
>DP00222     714
>DP00222     715
>DP00222     716
>DP00222     717
>DP00222     718
>DP00222     719
>DP00222     720
>DP00223     1
>DP00223     2
>DP00223     3
>DP00223     4
>DP00223     5
>DP00223     6
>DP00223     7
>DP00223     8
>DP00223     9
>DP00223     10
>DP00223     11
>DP00223     12
>DP00223     13
>DP00223     14
>DP00223     15
>DP00223     16
>DP00223     17
>DP00223     18
>DP00223     19
>DP00223     20
>DP00223     21
>DP00223     22
>DP00223     23
>DP00223     24
>DP00223     25
>DP00223     26
>DP00223     27
>DP00223     28
>DP00223     29
>DP00223     30
>DP00223     31
>DP00223     32
>DP00223     33
>DP00223     34
>DP00223     35
>DP00223     36
>DP00223     37
>DP00223     38
>DP00223     39
>DP00223     40
>DP00223     41
>DP00223     42
>DP00223     43
>DP00223     44
>DP00223     45
>DP00223     46
>DP00223     47
>DP00223     48
>DP00223     49
>DP00223     50
>DP00223     51
>DP00223     52
>DP00223     53
>DP00223     54
>DP00223     55
>DP00223     56
>DP00223     57
>DP00223     58
>DP00223     59
>DP00223     60
>DP00223     61
>DP00223     62
>DP00223     63
>DP00223     64
>DP00223     65
>DP00223     66
>DP00223     67
>DP00223     68
>DP00223     69
>DP00223     70
>DP00223     71
>DP00223     72
>DP00223     73
>DP00223     74
>DP00223     75
>DP00223     76
>DP00223     77
>DP00223     78
>DP00225     328
>DP00225     329
>DP00225     330
>DP00225     331
>DP00225     332
>DP00225     333
>DP00225     334
>DP00225     335
>DP00225     336
>DP00225     337
>DP00225     338
>DP00225     339
>DP00225     340
>DP00225     341
>DP00225     342
>DP00225     343
>DP00225     344
>DP00225     345
>DP00225     346
>DP00225     347
>DP00225     348
>DP00225     349
>DP00225     350
>DP00225     351
>DP00225     352
>DP00225     353
>DP00225     354
>DP00225     355
>DP00225     356
>DP00225     357
>DP00225     358
>DP00225     359
>DP00225     360
>DP00225     361
>DP00225     362
>DP00225     363
>DP00225     364
>DP00225     365
>DP00225     366
>DP00225     367
>DP00225     368
>DP00225     369
>DP00225     370
>DP00225     371
>DP00225     372
>DP00225     373
>DP00225     374
>DP00225     375
>DP00225     376
>DP00225     377
>DP00225     378
>DP00225     379
>DP00225     380
>DP00225     381
>DP00225     382
>DP00225     383
>DP00225     384
>DP00225     385
>DP00225     386
>DP00225     387
>DP00225     388
>DP00225     389
>DP00225     390
>DP00225     391
>DP00225     392
>DP00225     393
>DP00225     394
>DP00225     395
>DP00225     396
>DP00225     397
>DP00225     398
>DP00225     399
>DP00225     400
>DP00225     401
>DP00225     402
>DP00225     403
>DP00225     404
>DP00225     405
>DP00225     406
>DP00225     407
>DP00225     408
>DP00225     409
>DP00225     410
>DP00225     411
>DP00225     412
>DP00225     413
>DP00225     414
>DP00225     415
>DP00225     416
>DP00225     417
>DP00225     418
>DP00225     419
>DP00225     420
>DP00225     421
>DP00225     422
>DP00225     423
>DP00225     424
>DP00225     425
>DP00225     426
>DP00225     427
>DP00225     428
>DP00225     429
>DP00225     430
>DP00225     431
>DP00225     432
>DP00225     433
>DP00225     434
>DP00225     435
>DP00225     436
>DP00225     437
>DP00225     438
>DP00225     439
>DP00225     440
>DP00225     441
>DP00225     442
>DP00225     443
>DP00225     444
>DP00225     445
>DP00225     446
>DP00225     447
>DP00225     448
>DP00225     449
>DP00225     450
>DP00225     451
>DP00225     452
>DP00225     453
>DP00225     454
>DP00225     455
>DP00225     456
>DP00225     457
>DP00225     458
>DP00225     459
>DP00225     460
>DP00225     461
>DP00225     462
>DP00225     463
>DP00225     464
>DP00225     465
>DP00225     466
>DP00225     467
>DP00225     468
>DP00225     469
>DP00225     470
>DP00225     471
>DP00225     472
>DP00225     473
>DP00225     474
>DP00225     475
>DP00225     476
>DP00225     477
>DP00225     478
>DP00225     479
>DP00225     480
>DP00225     481
>DP00225     482
>DP00225     483
>DP00225     484
>DP00225     485
>DP00225     486
>DP00225     487
>DP00225     488
>DP00225     489
>DP00225     490
>DP00225     491
>DP00225     492
>DP00225     493
>DP00225     494
>DP00225     495
>DP00225     496
>DP00225     497
>DP00225     498
>DP00225     499
>DP00225     500
>DP00225     501
>DP00225     502
>DP00225     503
>DP00225     504
>DP00225     505
>DP00225     506
>DP00225     507
>DP00225     508
>DP00225     509
>DP00225     510
>DP00225     511
>DP00225     512
>DP00225     513
>DP00225     514
>DP00225     515
>DP00225     516
>DP00225     517
>DP00225     518
>DP00225     519
>DP00225     520
>DP00225     521
>DP00225     522
>DP00225     523
>DP00225     524
>DP00225     525
>DP00225     526
>DP00225     527
>DP00225     528
>DP00225     529
>DP00225     530
>DP00225     531
>DP00225     532
>DP00225     533
>DP00225     534
>DP00225     535
>DP00225     536
>DP00225     537
>DP00225     538
>DP00225     539
>DP00225     540
>DP00225     541
>DP00225     542
>DP00225     543
>DP00225     544
>DP00225     545
>DP00225     546
>DP00225     547
>DP00225     548
>DP00225     549
>DP00225     550
>DP00225     551
>DP00225     552
>DP00225     553
>DP00225     554
>DP00225     555
>DP00225     556
>DP00225     557
>DP00225     558
>DP00225     559
>DP00225     560
>DP00225     561
>DP00225     562
>DP00225     563
>DP00225     564
>DP00225     565
>DP00225     566
>DP00225     567
>DP00225     568
>DP00225     569
>DP00225     570
>DP00225     571
>DP00225     572
>DP00225     573
>DP00225     574
>DP00225     575
>DP00225     576
>DP00225     577
>DP00225     578
>DP00225     579
>DP00225     580
>DP00225     581
>DP00225     582
>DP00225     583
>DP00225     584
>DP00225     585
>DP00225     586
>DP00225     587
>DP00225     588
>DP00225     589
>DP00225     590
>DP00225     591
>DP00225     592
>DP00225     593
>DP00225     594
>DP00225     595
>DP00225     596
>DP00225     597
>DP00225     598
>DP00225     599
>DP00225     600
>DP00225     601
>DP00225     602
>DP00225     603
>DP00225     604
>DP00225     605
>DP00225     606
>DP00225     607
>DP00225     608
>DP00225     609
>DP00225     610
>DP00225     611
>DP00225     612
>DP00225     613
>DP00225     614
>DP00225     615
>DP00225     616
>DP00225     617
>DP00225     618
>DP00225     619
>DP00225     620
>DP00225     621
>DP00225     622
>DP00225     623
>DP00225     624
>DP00225     625
>DP00225     626
>DP00225     627
>DP00225     628
>DP00225     629
>DP00225     630
>DP00225     631
>DP00225     632
>DP00225     633
>DP00225     634
>DP00225     635
>DP00225     636
>DP00225     637
>DP00225     638
>DP00225     639
>DP00225     640
>DP00225     641
>DP00225     642
>DP00225     643
>DP00225     644
>DP00225     645
>DP00225     646
>DP00225     647
>DP00225     648
>DP00225     649
>DP00225     650
>DP00225     651
>DP00225     652
>DP00225     653
>DP00225     654
>DP00225     655
>DP00225     656
>DP00225     657
>DP00225     658
>DP00225     659
>DP00225     660
>DP00225     661
>DP00225     662
>DP00225     663
>DP00225     664
>DP00225     665
>DP00225     666
>DP00225     667
>DP00225     668
>DP00225     669
>DP00225     670
>DP00225     671
>DP00225     672
>DP00225     673
>DP00225     674
>DP00225     675
>DP00225     676
>DP00225     677
>DP00225     678
>DP00225     679
>DP00225     680
>DP00225     681
>DP00225     682
>DP00225     683
>DP00225     684
>DP00225     685
>DP00225     686
>DP00225     687
>DP00225     688
>DP00225     689
>DP00225     690
>DP00225     691
>DP00225     692
>DP00225     693
>DP00225     694
>DP00225     695
>DP00225     696
>DP00225     697
>DP00225     698
>DP00225     699
>DP00225     700
>DP00225     701
>DP00225     702
>DP00225     703
>DP00225     704
>DP00225     705
>DP00225     706
>DP00225     707
>DP00225     708
>DP00225     709
>DP00225     710
>DP00225     711
>DP00225     712
>DP00225     713
>DP00225     714
>DP00225     715
>DP00225     716
>DP00225     717
>DP00225     718
>DP00225     719
>DP00225     720
>DP00225     721
>DP00225     722
>DP00225     723
>DP00225     724
>DP00225     725
>DP00225     726
>DP00225     727
>DP00225     728
>DP00225     729
>DP00225     730
>DP00225     731
>DP00225     732
>DP00225     733
>DP00225     734
>DP00225     735
>DP00225     736
>DP00225     737
>DP00225     738
>DP00225     739
>DP00225     740
>DP00225     741
>DP00225     742
>DP00225     743
>DP00225     744
>DP00225     745
>DP00225     746
>DP00225     747
>DP00225     748
>DP00225     749
>DP00225     750
>DP00225     751
>DP00225     752
>DP00225     753
>DP00225     754
>DP00225     755
>DP00225     756
>DP00225     757
>DP00225     758
>DP00225     759
>DP00225     760
>DP00225     761
>DP00225     762
>DP00225     763
>DP00225     764
>DP00225     765
>DP00225     766
>DP00225     767
>DP00225     768
>DP00225     769
>DP00225     770
>DP00225     771
>DP00225     772
>DP00225     773
>DP00225     774
>DP00225     775
>DP00225     776
>DP00225     777
>DP00225     778
>DP00225     779
>DP00225     780
>DP00225     781
>DP00225     782
>DP00225     783
>DP00225     784
>DP00225     785
>DP00225     786
>DP00225     787
>DP00225     788
>DP00225     789
>DP00225     790
>DP00225     791
>DP00225     792
>DP00225     793
>DP00225     794
>DP00225     795
>DP00225     796
>DP00225     797
>DP00225     798
>DP00225     799
>DP00225     800
>DP00225     801
>DP00225     802
>DP00225     803
>DP00225     804
>DP00225     805
>DP00225     806
>DP00225     807
>DP00225     808
>DP00225     809
>DP00225     810
>DP00225     811
>DP00225     812
>DP00225     813
>DP00225     814
>DP00225     815
>DP00225     816
>DP00225     817
>DP00225     818
>DP00225     819
>DP00225     820
>DP00225     821
>DP00225     822
>DP00225     823
>DP00225     824
>DP00225     825
>DP00225     826
>DP00225     827
>DP00225     828
>DP00225     829
>DP00225     830
>DP00225     831
>DP00225     832
>DP00225     833
>DP00225     834
>DP00225     835
>DP00225     836
>DP00225     837
>DP00225     838
>DP00225     839
>DP00225     840
>DP00225     841
>DP00225     842
>DP00225     843
>DP00225     844
>DP00225     845
>DP00225     846
>DP00225     847
>DP00225     848
>DP00225     849
>DP00225     850
>DP00225     851
>DP00225     852
>DP00225     853
>DP00225     854
>DP00225     855
>DP00225     856
>DP00225     857
>DP00225     858
>DP00225     859
>DP00225     860
>DP00225     861
>DP00225     862
>DP00225     863
>DP00225     864
>DP00225     865
>DP00225     866
>DP00225     867
>DP00225     868
>DP00225     869
>DP00225     870
>DP00225     871
>DP00225     872
>DP00225     873
>DP00225     874
>DP00225     875
>DP00225     876
>DP00225     877
>DP00225     878
>DP00225     879
>DP00225     880
>DP00225     881
>DP00225     882
>DP00225     883
>DP00225     884
>DP00225     885
>DP00225     886
>DP00225     887
>DP00225     888
>DP00225     889
>DP00225     890
>DP00225     891
>DP00225     892
>DP00225     893
>DP00225     894
>DP00225     895
>DP00225     896
>DP00227     1
>DP00227     2
>DP00227     3
>DP00227     4
>DP00227     5
>DP00227     6
>DP00227     7
>DP00227     8
>DP00227     9
>DP00227     10
>DP00227     11
>DP00227     12
>DP00227     13
>DP00227     14
>DP00227     15
>DP00227     16
>DP00227     17
>DP00227     18
>DP00227     19
>DP00227     20
>DP00227     21
>DP00227     22
>DP00227     23
>DP00227     24
>DP00227     25
>DP00227     26
>DP00227     27
>DP00227     28
>DP00227     29
>DP00227     30
>DP00227     31
>DP00227     32
>DP00227     33
>DP00227     34
>DP00227     35
>DP00227     36
>DP00227     37
>DP00227     38
>DP00227     39
>DP00227     40
>DP00227     41
>DP00227     42
>DP00227     43
>DP00227     44
>DP00227     45
>DP00227     46
>DP00227     47
>DP00227     48
>DP00227     49
>DP00227     50
>DP00227     51
>DP00227     52
>DP00227     53
>DP00227     54
>DP00227     55
>DP00227     56
>DP00227     57
>DP00227     58
>DP00227     59
>DP00227     60
>DP00227     61
>DP00227     62
>DP00227     63
>DP00227     64
>DP00227     65
>DP00227     66
>DP00227     67
>DP00227     68
>DP00227     69
>DP00227     70
>DP00227     71
>DP00227     72
>DP00227     73
>DP00227     74
>DP00227     75
>DP00227     76
>DP00227     77
>DP00227     78
>DP00227     79
>DP00227     80
>DP00227     81
>DP00227     82
>DP00227     83
>DP00227     84
>DP00227     85
>DP00227     86
>DP00227     87
>DP00227     88
>DP00227     89
>DP00227     90
>DP00227     91
>DP00227     92
>DP00227     93
>DP00227     94
>DP00227     95
>DP00227     96
>DP00227     97
>DP00227     98
>DP00227     99
>DP00227     100
>DP00227     101
>DP00227     102
>DP00227     103
>DP00227     104
>DP00227     105
>DP00227     106
>DP00227     107
>DP00227     108
>DP00227     109
>DP00227     110
>DP00227     111
>DP00227     112
>DP00227     113
>DP00227     114
>DP00227     115
>DP00227     116
>DP00227     117
>DP00227     118
>DP00227     119
>DP00227     120
>DP00227     121
>DP00227     122
>DP00227     123
>DP00227     124
>DP00227     125
>DP00227     126
>DP00227     127
>DP00227     128
>DP00227     129
>DP00227     130
>DP00227     131
>DP00227     132
>DP00227     133
>DP00227     134
>DP00227     135
>DP00227     136
>DP00227     137
>DP00227     138
>DP00227     139
>DP00227     140
>DP00227     141
>DP00227     142
>DP00227     143
>DP00227     144
>DP00227     145
>DP00227     146
>DP00227     147
>DP00227     148
>DP00227     149
>DP00227     150
>DP00227     151
>DP00227     152
>DP00227     153
>DP00227     154
>DP00227     155
>DP00227     156
>DP00227     157
>DP00227     158
>DP00227     159
>DP00227     160
>DP00227     161
>DP00227     162
>DP00227     163
>DP00227     164
>DP00227     165
>DP00227     166
>DP00227     167
>DP00227     168
>DP00227     169
>DP00227     170
>DP00227     171
>DP00227     172
>DP00227     173
>DP00227     174
>DP00227     175
>DP00227     176
>DP00227     177
>DP00227     178
>DP00227     179
>DP00227     180
>DP00227     181
>DP00227     182
>DP00227     183
>DP00227     184
>DP00227     185
>DP00227     186
>DP00227     187
>DP00227     188
>DP00227     189
>DP00227     190
>DP00227     191
>DP00227     192
>DP00227     193
>DP00227     194
>DP00227     195
>DP00227     196
>DP00227     197
>DP00227     198
>DP00227     199
>DP00227     200
>DP00227     201
>DP00227     202
>DP00227     203
>DP00227     204
>DP00227     205
>DP00227     206
>DP00227     207
>DP00227     208
>DP00227     209
>DP00227     210
>DP00227     211
>DP00227     212
>DP00227     213
>DP00227     214
>DP00227     215
>DP00227     216
>DP00227     217
>DP00227     218
>DP00227     219
>DP00227     220
>DP00227     221
>DP00227     222
>DP00227     223
>DP00227     224
>DP00227     225
>DP00227     226
>DP00227     227
>DP00227     228
>DP00227     229
>DP00227     230
>DP00227     231
>DP00227     232
>DP00227     233
>DP00227     234
>DP00227     235
>DP00227     236
>DP00227     237
>DP00227     238
>DP00227     239
>DP00227     240
>DP00227     241
>DP00227     242
>DP00227     243
>DP00227     244
>DP00227     245
>DP00227     246
>DP00227     247
>DP00227     248
>DP00227     249
>DP00227     250
>DP00227     251
>DP00227     252
>DP00227     253
>DP00227     254
>DP00227     255
>DP00227     256
>DP00227     257
>DP00227     258
>DP00227     259
>DP00227     260
>DP00227     261
>DP00227     262
>DP00227     263
>DP00227     264
>DP00227     265
>DP00227     266
>DP00227     267
>DP00227     268
>DP00227     269
>DP00227     270
>DP00227     271
>DP00227     272
>DP00227     273
>DP00227     274
>DP00227     275
>DP00227     276
>DP00227     277
>DP00227     278
>DP00227     279
>DP00227     280
>DP00228     724
>DP00228     725
>DP00228     726
>DP00228     727
>DP00228     728
>DP00228     729
>DP00228     730
>DP00228     731
>DP00228     732
>DP00228     733
>DP00228     734
>DP00228     735
>DP00228     736
>DP00228     737
>DP00228     738
>DP00228     739
>DP00228     740
>DP00228     741
>DP00228     742
>DP00228     743
>DP00228     744
>DP00228     745
>DP00228     746
>DP00228     747
>DP00228     748
>DP00228     749
>DP00228     750
>DP00228     751
>DP00228     752
>DP00228     753
>DP00228     754
>DP00228     755
>DP00228     756
>DP00228     757
>DP00228     758
>DP00228     759
>DP00228     760
>DP00230     361
>DP00230     362
>DP00230     363
>DP00230     364
>DP00230     365
>DP00230     366
>DP00230     367
>DP00230     368
>DP00230     369
>DP00230     370
>DP00230     371
>DP00230     372
>DP00230     373
>DP00230     374
>DP00230     375
>DP00230     376
>DP00230     377
>DP00230     378
>DP00230     379
>DP00230     380
>DP00230     381
>DP00230     382
>DP00230     383
>DP00230     384
>DP00230     385
>DP00230     386
>DP00230     387
>DP00230     388
>DP00230     389
>DP00230     390
>DP00230     391
>DP00230     392
>DP00230     393
>DP00230     394
>DP00230     395
>DP00230     396
>DP00230     397
>DP00230     398
>DP00230     399
>DP00230     400
>DP00230     401
>DP00230     402
>DP00230     403
>DP00230     404
>DP00230     405
>DP00230     406
>DP00230     407
>DP00230     408
>DP00230     409
>DP00230     410
>DP00230     411
>DP00230     412
>DP00230     413
>DP00230     414
>DP00230     415
>DP00230     416
>DP00230     417
>DP00230     418
>DP00230     419
>DP00230     420
>DP00230     421
>DP00230     422
>DP00230     423
>DP00230     424
>DP00230     425
>DP00230     426
>DP00230     427
>DP00230     428
>DP00230     429
>DP00230     430
>DP00230     431
>DP00230     432
>DP00230     433
>DP00230     434
>DP00230     435
>DP00232     1
>DP00232     2
>DP00232     3
>DP00232     4
>DP00232     5
>DP00232     6
>DP00232     7
>DP00232     8
>DP00232     9
>DP00232     10
>DP00232     11
>DP00232     12
>DP00232     13
>DP00232     14
>DP00232     15
>DP00232     16
>DP00232     17
>DP00232     18
>DP00232     19
>DP00232     20
>DP00232     21
>DP00232     22
>DP00232     23
>DP00232     24
>DP00232     25
>DP00232     26
>DP00232     27
>DP00232     28
>DP00232     29
>DP00232     30
>DP00232     31
>DP00232     32
>DP00232     33
>DP00232     34
>DP00232     35
>DP00232     36
>DP00232     37
>DP00232     38
>DP00232     39
>DP00232     40
>DP00232     41
>DP00232     42
>DP00232     43
>DP00232     44
>DP00232     45
>DP00232     46
>DP00232     47
>DP00232     48
>DP00232     49
>DP00232     50
>DP00232     51
>DP00232     52
>DP00232     53
>DP00232     54
>DP00232     55
>DP00232     56
>DP00232     57
>DP00232     58
>DP00232     59
>DP00232     60
>DP00232     61
>DP00232     62
>DP00232     63
>DP00232     64
>DP00232     65
>DP00232     66
>DP00232     67
>DP00232     68
>DP00232     69
>DP00232     70
>DP00232     71
>DP00232     72
>DP00232     73
>DP00232     74
>DP00232     75
>DP00232     76
>DP00232     77
>DP00232     78
>DP00232     79
>DP00232     80
>DP00232     81
>DP00232     82
>DP00232     83
>DP00232     84
>DP00232     85
>DP00232     86
>DP00232     87
>DP00232     88
>DP00232     89
>DP00232     90
>DP00232     91
>DP00232     92
>DP00232     93
>DP00232     94
>DP00232     95
>DP00232     96
>DP00232     97
>DP00232     98
>DP00232     99
>DP00232     100
>DP00232     101
>DP00232     102
>DP00232     103
>DP00232     104
>DP00232     105
>DP00232     106
>DP00232     107
>DP00232     108
>DP00232     109
>DP00232     110
>DP00232     111
>DP00232     112
>DP00232     113
>DP00232     114
>DP00232     115
>DP00232     116
>DP00232     117
>DP00232     118
>DP00232     119
>DP00232     120
>DP00232     121
>DP00232     122
>DP00232     123
>DP00232     124
>DP00232     125
>DP00232     126
>DP00232     127
>DP00232     128
>DP00232     129
>DP00232     130
>DP00232     131
>DP00232     132
>DP00232     133
>DP00232     134
>DP00232     135
>DP00232     136
>DP00232     137
>DP00232     138
>DP00232     139
>DP00232     140
>DP00232     141
>DP00232     142
>DP00232     143
>DP00232     144
>DP00232     145
>DP00232     146
>DP00232     147
>DP00232     148
>DP00232     149
>DP00232     150
>DP00232     151
>DP00232     152
>DP00232     153
>DP00232     154
>DP00232     155
>DP00232     156
>DP00232     157
>DP00232     158
>DP00232     159
>DP00232     160
>DP00232     161
>DP00232     162
>DP00232     163
>DP00232     164
>DP00232     165
>DP00232     166
>DP00232     167
>DP00232     168
>DP00232     169
>DP00232     170
>DP00232     171
>DP00232     172
>DP00232     173
>DP00232     174
>DP00232     175
>DP00232     176
>DP00232     177
>DP00232     178
>DP00232     179
>DP00232     180
>DP00232     181
>DP00232     182
>DP00232     183
>DP00232     184
>DP00232     185
>DP00232     186
>DP00232     187
>DP00232     188
>DP00232     189
>DP00232     190
>DP00232     191
>DP00232     192
>DP00232     193
>DP00232     194
>DP00232     195
>DP00232     196
>DP00232     197
>DP00232     198
>DP00232     199
>DP00232     200
>DP00232     201
>DP00232     202
>DP00232     203
>DP00232     204
>DP00232     205
>DP00234     1
>DP00234     2
>DP00234     3
>DP00234     4
>DP00234     5
>DP00234     6
>DP00234     7
>DP00234     8
>DP00234     9
>DP00234     10
>DP00234     11
>DP00234     12
>DP00234     13
>DP00234     14
>DP00234     15
>DP00234     16
>DP00234     17
>DP00234     18
>DP00234     19
>DP00234     20
>DP00234     21
>DP00234     22
>DP00234     23
>DP00234     24
>DP00234     25
>DP00234     26
>DP00234     27
>DP00234     28
>DP00234     29
>DP00234     30
>DP00234     31
>DP00234     32
>DP00234     33
>DP00234     34
>DP00234     35
>DP00234     36
>DP00234     37
>DP00234     38
>DP00234     39
>DP00234     40
>DP00234     41
>DP00234     42
>DP00234     43
>DP00234     44
>DP00234     45
>DP00234     46
>DP00234     47
>DP00234     48
>DP00234     49
>DP00234     50
>DP00234     51
>DP00234     52
>DP00234     53
>DP00234     54
>DP00234     55
>DP00234     56
>DP00234     57
>DP00234     58
>DP00234     59
>DP00234     60
>DP00234     61
>DP00234     62
>DP00235     27
>DP00235     28
>DP00235     29
>DP00235     420
>DP00235     421
>DP00235     422
>DP00235     423
>DP00235     424
>DP00235     425
>DP00235     426
>DP00235     427
>DP00235     428
>DP00235     429
>DP00235     430
>DP00235     431
>DP00235     432
>DP00235     433
>DP00235     434
>DP00235     435
>DP00236     134
>DP00236     135
>DP00236     136
>DP00236     137
>DP00236     138
>DP00236     139
>DP00236     140
>DP00236     141
>DP00236     142
>DP00236     143
>DP00236     144
>DP00236     145
>DP00236     146
>DP00236     147
>DP00236     148
>DP00236     149
>DP00236     150
>DP00236     151
>DP00236     152
>DP00236     153
>DP00236     154
>DP00236     155
>DP00236     156
>DP00236     157
>DP00236     158
>DP00236     159
>DP00236     160
>DP00236     161
>DP00236     162
>DP00236     163
>DP00236     164
>DP00236     165
>DP00236     166
>DP00236     167
>DP00236     168
>DP00236     169
>DP00236     170
>DP00236     171
>DP00236     172
>DP00236     173
>DP00236     174
>DP00236     175
>DP00236     176
>DP00236     177
>DP00236     178
>DP00236     179
>DP00236     180
>DP00236     181
>DP00236     182
>DP00236     183
>DP00236     184
>DP00236     185
>DP00236     186
>DP00236     187
>DP00236     188
>DP00236     189
>DP00236     190
>DP00236     191
>DP00236     192
>DP00236     193
>DP00236     194
>DP00236     195
>DP00236     196
>DP00236     197
>DP00236     198
>DP00236     199
>DP00236     200
>DP00236     201
>DP00236     202
>DP00236     203
>DP00236     204
>DP00236     205
>DP00236     206
>DP00236     207
>DP00236     208
>DP00236     209
>DP00236     210
>DP00236     211
>DP00236     212
>DP00236     213
>DP00236     214
>DP00236     215
>DP00236     216
>DP00236     217
>DP00236     218
>DP00236     219
>DP00236     220
>DP00236     221
>DP00236     222
>DP00236     223
>DP00236     224
>DP00236     225
>DP00236     226
>DP00236     227
>DP00236     228
>DP00236     229
>DP00236     230
>DP00236     231
>DP00236     232
>DP00236     233
>DP00236     234
>DP00236     235
>DP00236     236
>DP00236     237
>DP00236     238
>DP00236     239
>DP00236     240
>DP00236     241
>DP00236     242
>DP00236     243
>DP00236     244
>DP00236     245
>DP00236     246
>DP00236     247
>DP00236     248
>DP00236     249
>DP00236     250
>DP00236     251
>DP00236     252
>DP00236     253
>DP00236     254
>DP00236     255
>DP00236     256
>DP00236     257
>DP00236     258
>DP00236     259
>DP00236     260
>DP00236     261
>DP00236     262
>DP00236     263
>DP00236     264
>DP00236     265
>DP00236     266
>DP00236     267
>DP00236     268
>DP00236     269
>DP00236     270
>DP00236     271
>DP00236     272
>DP00236     273
>DP00236     274
>DP00236     275
>DP00236     276
>DP00236     277
>DP00236     278
>DP00236     279
>DP00236     280
>DP00236     281
>DP00236     282
>DP00236     283
>DP00236     284
>DP00236     285
>DP00236     286
>DP00236     287
>DP00236     288
>DP00236     289
>DP00236     290
>DP00236     291
>DP00236     292
>DP00236     293
>DP00236     294
>DP00236     295
>DP00236     296
>DP00236     297
>DP00236     298
>DP00236     299
>DP00236     300
>DP00236     301
>DP00236     302
>DP00236     303
>DP00236     304
>DP00238     170
>DP00238     171
>DP00238     172
>DP00238     173
>DP00238     174
>DP00238     175
>DP00238     176
>DP00238     177
>DP00238     178
>DP00238     179
>DP00238     180
>DP00238     181
>DP00238     182
>DP00238     183
>DP00238     184
>DP00238     185
>DP00238     186
>DP00238     187
>DP00238     188
>DP00238     189
>DP00238     190
>DP00238     191
>DP00238     192
>DP00238     193
>DP00238     194
>DP00238     195
>DP00238     196
>DP00238     197
>DP00238     198
>DP00238     199
>DP00238     200
>DP00238     201
>DP00238     202
>DP00238     203
>DP00238     204
>DP00238     205
>DP00238     206
>DP00238     207
>DP00238     208
>DP00238     209
>DP00238     210
>DP00238     211
>DP00238     212
>DP00238     213
>DP00238     214
>DP00238     215
>DP00238     216
>DP00238     217
>DP00238     218
>DP00238     219
>DP00238     220
>DP00238     221
>DP00238     222
>DP00238     223
>DP00238     224
>DP00238     225
>DP00238     226
>DP00238     227
>DP00238     228
>DP00238     229
>DP00238     230
>DP00238     231
>DP00238     232
>DP00238     233
>DP00238     234
>DP00238     235
>DP00238     236
>DP00238     237
>DP00238     238
>DP00238     239
>DP00238     240
>DP00238     241
>DP00238     242
>DP00238     243
>DP00238     244
>DP00238     245
>DP00238     246
>DP00238     247
>DP00238     248
>DP00238     249
>DP00238     250
>DP00238     251
>DP00238     252
>DP00238     253
>DP00238     254
>DP00238     255
>DP00238     256
>DP00238     257
>DP00238     258
>DP00238     259
>DP00238     260
>DP00238     261
>DP00238     262
>DP00238     263
>DP00238     264
>DP00238     265
>DP00238     266
>DP00238     267
>DP00238     268
>DP00238     269
>DP00238     270
>DP00238     271
>DP00238     272
>DP00238     273
>DP00238     274
>DP00238     275
>DP00238     276
>DP00238     277
>DP00238     278
>DP00238     279
>DP00238     280
>DP00238     281
>DP00238     282
>DP00238     283
>DP00238     284
>DP00238     285
>DP00238     286
>DP00238     287
>DP00238     288
>DP00238     289
>DP00238     290
>DP00238     291
>DP00238     292
>DP00238     293
>DP00238     294
>DP00238     295
>DP00238     296
>DP00238     297
>DP00238     298
>DP00238     299
>DP00238     300
>DP00238     301
>DP00238     302
>DP00238     303
>DP00238     304
>DP00238     305
>DP00238     306
>DP00238     307
>DP00238     308
>DP00238     309
>DP00238     310
>DP00238     311
>DP00238     312
>DP00238     313
>DP00238     314
>DP00238     315
>DP00238     316
>DP00238     317
>DP00238     318
>DP00238     319
>DP00238     320
>DP00238     321
>DP00238     322
>DP00238     323
>DP00238     324
>DP00238     325
>DP00238     326
>DP00238     327
>DP00238     328
>DP00238     329
>DP00238     330
>DP00238     331
>DP00238     332
>DP00238     333
>DP00238     334
>DP00238     335
>DP00238     336
>DP00238     337
>DP00238     338
>DP00238     339
>DP00238     340
>DP00238     341
>DP00238     342
>DP00238     343
>DP00238     344
>DP00238     345
>DP00238     346
>DP00238     347
>DP00238     348
>DP00238     349
>DP00238     350
>DP00238     351
>DP00238     352
>DP00238     353
>DP00238     354
>DP00238     355
>DP00238     356
>DP00238     357
>DP00238     358
>DP00238     359
>DP00238     360
>DP00238     361
>DP00238     362
>DP00238     363
>DP00238     364
>DP00238     365
>DP00238     366
>DP00238     367
>DP00238     368
>DP00238     369
>DP00238     370
>DP00238     371
>DP00238     372
>DP00238     373
>DP00238     374
>DP00238     375
>DP00238     376
>DP00238     377
>DP00238     378
>DP00238     379
>DP00238     380
>DP00238     381
>DP00238     382
>DP00238     383
>DP00238     384
>DP00238     385
>DP00238     386
>DP00238     387
>DP00238     388
>DP00238     389
>DP00238     390
>DP00238     391
>DP00238     392
>DP00238     393
>DP00238     394
>DP00238     395
>DP00238     396
>DP00238     397
>DP00238     398
>DP00238     399
>DP00238     400
>DP00238     401
>DP00238     402
>DP00238     403
>DP00238     404
>DP00238     405
>DP00238     406
>DP00238     407
>DP00238     408
>DP00238     409
>DP00238     410
>DP00238     411
>DP00238     412
>DP00238     413
>DP00238     414
>DP00238     415
>DP00238     416
>DP00238     417
>DP00238     418
>DP00238     419
>DP00238     420
>DP00238     421
>DP00238     422
>DP00238     423
>DP00238     424
>DP00238     425
>DP00238     426
>DP00238     427
>DP00238     428
>DP00238     429
>DP00238     430
>DP00238     431
>DP00238     432
>DP00238     433
>DP00238     434
>DP00238     435
>DP00238     436
>DP00238     437
>DP00238     438
>DP00238     439
>DP00238     440
>DP00238     441
>DP00238     442
>DP00238     443
>DP00238     444
>DP00238     445
>DP00238     446
>DP00238     447
>DP00238     448
>DP00238     449
>DP00238     450
>DP00238     451
>DP00238     452
>DP00238     453
>DP00238     454
>DP00238     455
>DP00238     456
>DP00238     457
>DP00238     458
>DP00238     459
>DP00238     460
>DP00238     461
>DP00238     462
>DP00238     463
>DP00238     464
>DP00238     465
>DP00238     466
>DP00238     467
>DP00238     468
>DP00238     469
>DP00238     470
>DP00238     471
>DP00238     472
>DP00238     473
>DP00238     474
>DP00238     475
>DP00238     476
>DP00238     477
>DP00238     478
>DP00238     479
>DP00238     480
>DP00238     481
>DP00238     482
>DP00238     483
>DP00238     484
>DP00238     485
>DP00238     486
>DP00238     487
>DP00238     488
>DP00238     489
>DP00238     490
>DP00238     491
>DP00238     492
>DP00238     493
>DP00238     494
>DP00238     495
>DP00238     496
>DP00238     497
>DP00238     498
>DP00238     499
>DP00238     500
>DP00238     501
>DP00238     502
>DP00238     503
>DP00238     504
>DP00238     505
>DP00238     506
>DP00238     507
>DP00238     508
>DP00238     509
>DP00238     510
>DP00238     511
>DP00238     512
>DP00238     513
>DP00238     514
>DP00238     515
>DP00238     516
>DP00238     517
>DP00238     518
>DP00238     519
>DP00238     520
>DP00238     521
>DP00238     522
>DP00238     523
>DP00238     524
>DP00238     525
>DP00238     526
>DP00238     527
>DP00238     528
>DP00238     529
>DP00238     530
>DP00238     531
>DP00238     532
>DP00238     533
>DP00238     534
>DP00238     535
>DP00238     536
>DP00238     537
>DP00238     538
>DP00238     539
>DP00238     540
>DP00238     541
>DP00238     542
>DP00238     543
>DP00238     544
>DP00238     545
>DP00238     546
>DP00238     547
>DP00238     548
>DP00238     549
>DP00238     550
>DP00238     551
>DP00238     552
>DP00238     553
>DP00238     554
>DP00238     555
>DP00238     556
>DP00238     557
>DP00238     558
>DP00238     559
>DP00238     560
>DP00238     561
>DP00238     562
>DP00238     563
>DP00238     564
>DP00238     565
>DP00238     566
>DP00238     567
>DP00238     568
>DP00238     569
>DP00238     570
>DP00238     571
>DP00238     572
>DP00238     573
>DP00238     574
>DP00238     575
>DP00238     576
>DP00238     577
>DP00238     578
>DP00238     579
>DP00238     580
>DP00238     581
>DP00238     582
>DP00238     583
>DP00238     584
>DP00238     585
>DP00238     586
>DP00238     587
>DP00238     588
>DP00238     589
>DP00238     590
>DP00238     591
>DP00238     592
>DP00238     593
>DP00238     594
>DP00238     595
>DP00238     596
>DP00238     597
>DP00238     598
>DP00238     599
>DP00238     600
>DP00238     601
>DP00238     602
>DP00238     603
>DP00238     604
>DP00238     605
>DP00238     606
>DP00238     607
>DP00238     608
>DP00238     609
>DP00238     610
>DP00238     611
>DP00238     612
>DP00238     613
>DP00238     614
>DP00238     615
>DP00238     616
>DP00238     617
>DP00238     618
>DP00238     619
>DP00238     620
>DP00238     621
>DP00238     622
>DP00238     623
>DP00238     624
>DP00238     625
>DP00238     626
>DP00238     627
>DP00238     628
>DP00238     629
>DP00238     630
>DP00238     631
>DP00238     632
>DP00238     633
>DP00238     634
>DP00238     635
>DP00238     636
>DP00238     637
>DP00238     638
>DP00238     639
>DP00238     640
>DP00238     641
>DP00238     642
>DP00238     643
>DP00238     644
>DP00238     645
>DP00238     646
>DP00238     647
>DP00238     648
>DP00238     649
>DP00238     650
>DP00238     651
>DP00238     652
>DP00238     653
>DP00238     654
>DP00238     655
>DP00238     656
>DP00238     657
>DP00238     658
>DP00238     659
>DP00238     660
>DP00238     661
>DP00238     662
>DP00238     663
>DP00238     664
>DP00238     665
>DP00238     666
>DP00238     667
>DP00238     668
>DP00238     669
>DP00238     670
>DP00238     671
>DP00238     672
>DP00238     673
>DP00238     674
>DP00238     675
>DP00238     676
>DP00238     677
>DP00238     678
>DP00238     679
>DP00238     680
>DP00238     681
>DP00238     682
>DP00238     683
>DP00238     684
>DP00238     685
>DP00238     686
>DP00238     687
>DP00238     688
>DP00238     689
>DP00238     690
>DP00238     691
>DP00238     692
>DP00238     693
>DP00238     694
>DP00238     695
>DP00238     696
>DP00238     697
>DP00238     698
>DP00238     699
>DP00238     700
>DP00238     701
>DP00238     702
>DP00238     703
>DP00238     704
>DP00238     705
>DP00238     706
>DP00238     707
>DP00238     708
>DP00238     709
>DP00238     710
>DP00238     711
>DP00238     712
>DP00238     713
>DP00238     714
>DP00238     715
>DP00238     716
>DP00238     717
>DP00238     718
>DP00238     719
>DP00238     720
>DP00238     721
>DP00238     722
>DP00238     723
>DP00238     724
>DP00238     725
>DP00238     726
>DP00238     727
>DP00238     728
>DP00238     729
>DP00238     730
>DP00238     731
>DP00238     732
>DP00238     733
>DP00238     734
>DP00238     735
>DP00238     736
>DP00238     737
>DP00238     738
>DP00238     739
>DP00238     740
>DP00238     741
>DP00238     742
>DP00238     743
>DP00238     744
>DP00238     745
>DP00238     746
>DP00238     747
>DP00238     748
>DP00238     749
>DP00238     750
>DP00238     751
>DP00238     752
>DP00238     753
>DP00238     754
>DP00238     755
>DP00238     756
>DP00238     757
>DP00238     758
>DP00238     759
>DP00238     760
>DP00238     761
>DP00238     762
>DP00238     763
>DP00238     764
>DP00238     765
>DP00238     766
>DP00238     767
>DP00238     768
>DP00238     769
>DP00238     770
>DP00238     771
>DP00238     772
>DP00238     773
>DP00238     774
>DP00238     775
>DP00238     776
>DP00238     777
>DP00238     778
>DP00238     779
>DP00238     780
>DP00238     781
>DP00238     782
>DP00238     783
>DP00238     784
>DP00238     785
>DP00238     786
>DP00238     787
>DP00238     788
>DP00238     789
>DP00238     790
>DP00238     791
>DP00238     792
>DP00238     793
>DP00238     794
>DP00238     795
>DP00238     796
>DP00238     797
>DP00238     798
>DP00238     799
>DP00238     800
>DP00238     801
>DP00238     802
>DP00238     803
>DP00238     804
>DP00238     805
>DP00238     806
>DP00238     807
>DP00238     808
>DP00238     809
>DP00238     810
>DP00238     811
>DP00238     812
>DP00238     813
>DP00238     814
>DP00238     815
>DP00238     816
>DP00238     817
>DP00238     818
>DP00238     819
>DP00238     820
>DP00238     821
>DP00238     822
>DP00238     823
>DP00238     824
>DP00238     825
>DP00238     826
>DP00238     827
>DP00238     828
>DP00238     829
>DP00238     830
>DP00238     831
>DP00238     832
>DP00238     833
>DP00238     834
>DP00238     835
>DP00238     836
>DP00238     837
>DP00238     838
>DP00238     839
>DP00238     840
>DP00238     841
>DP00238     842
>DP00238     843
>DP00238     844
>DP00238     845
>DP00238     846
>DP00238     847
>DP00238     848
>DP00238     849
>DP00238     850
>DP00238     851
>DP00238     852
>DP00238     853
>DP00238     854
>DP00238     855
>DP00238     856
>DP00238     857
>DP00238     858
>DP00238     859
>DP00238     860
>DP00238     861
>DP00238     862
>DP00238     863
>DP00238     864
>DP00238     865
>DP00238     866
>DP00238     867
>DP00238     868
>DP00238     869
>DP00238     870
>DP00238     871
>DP00238     872
>DP00238     873
>DP00238     874
>DP00238     875
>DP00238     876
>DP00238     877
>DP00238     878
>DP00238     879
>DP00238     880
>DP00238     881
>DP00238     882
>DP00238     883
>DP00238     884
>DP00238     885
>DP00238     886
>DP00238     887
>DP00238     888
>DP00238     889
>DP00238     890
>DP00238     891
>DP00238     892
>DP00238     893
>DP00238     894
>DP00238     895
>DP00238     896
>DP00238     897
>DP00238     898
>DP00238     899
>DP00238     900
>DP00238     901
>DP00238     902
>DP00238     903
>DP00238     904
>DP00238     905
>DP00238     906
>DP00238     907
>DP00238     908
>DP00238     909
>DP00238     910
>DP00238     911
>DP00238     912
>DP00238     913
>DP00238     914
>DP00238     915
>DP00238     916
>DP00238     917
>DP00238     918
>DP00238     919
>DP00238     920
>DP00238     921
>DP00238     922
>DP00238     923
>DP00238     924
>DP00238     925
>DP00238     926
>DP00238     927
>DP00238     928
>DP00238     929
>DP00238     930
>DP00238     931
>DP00238     932
>DP00238     933
>DP00238     934
>DP00238     935
>DP00238     936
>DP00238     937
>DP00238     938
>DP00238     939
>DP00238     940
>DP00238     941
>DP00238     942
>DP00238     943
>DP00238     944
>DP00238     945
>DP00238     946
>DP00238     947
>DP00238     948
>DP00238     949
>DP00238     950
>DP00238     951
>DP00238     952
>DP00238     953
>DP00238     954
>DP00238     955
>DP00238     956
>DP00238     957
>DP00238     958
>DP00238     959
>DP00238     960
>DP00238     961
>DP00238     962
>DP00238     963
>DP00238     964
>DP00238     965
>DP00238     966
>DP00238     967
>DP00238     968
>DP00238     969
>DP00238     970
>DP00238     971
>DP00238     972
>DP00238     973
>DP00238     974
>DP00238     975
>DP00238     976
>DP00238     977
>DP00238     978
>DP00238     979
>DP00238     980
>DP00238     981
>DP00238     982
>DP00238     983
>DP00238     984
>DP00238     985
>DP00238     986
>DP00238     987
>DP00238     988
>DP00238     989
>DP00238     990
>DP00238     991
>DP00238     992
>DP00238     993
>DP00238     994
>DP00238     995
>DP00238     996
>DP00238     997
>DP00238     998
>DP00238     999
>DP00238     1000
>DP00238     1001
>DP00238     1002
>DP00238     1003
>DP00238     1004
>DP00238     1005
>DP00238     1006
>DP00238     1007
>DP00238     1008
>DP00238     1009
>DP00238     1010
>DP00238     1011
>DP00238     1012
>DP00238     1013
>DP00238     1014
>DP00238     1015
>DP00238     1016
>DP00238     1017
>DP00238     1018
>DP00238     1019
>DP00238     1020
>DP00238     1021
>DP00238     1022
>DP00238     1023
>DP00238     1024
>DP00238     1025
>DP00238     1026
>DP00238     1027
>DP00238     1028
>DP00238     1029
>DP00238     1030
>DP00238     1031
>DP00238     1032
>DP00238     1033
>DP00238     1034
>DP00238     1035
>DP00238     1036
>DP00238     1037
>DP00238     1038
>DP00238     1039
>DP00238     1040
>DP00238     1041
>DP00238     1042
>DP00238     1043
>DP00238     1044
>DP00238     1045
>DP00238     1046
>DP00238     1047
>DP00238     1048
>DP00238     1049
>DP00238     1050
>DP00238     1051
>DP00238     1052
>DP00238     1053
>DP00238     1054
>DP00238     1055
>DP00238     1056
>DP00238     1057
>DP00238     1058
>DP00238     1059
>DP00238     1060
>DP00238     1061
>DP00238     1062
>DP00238     1063
>DP00238     1064
>DP00238     1065
>DP00238     1066
>DP00238     1067
>DP00238     1068
>DP00238     1069
>DP00238     1070
>DP00238     1071
>DP00238     1072
>DP00238     1073
>DP00238     1074
>DP00238     1075
>DP00238     1076
>DP00238     1077
>DP00238     1078
>DP00238     1079
>DP00238     1080
>DP00238     1081
>DP00238     1082
>DP00238     1083
>DP00238     1084
>DP00238     1085
>DP00238     1086
>DP00238     1087
>DP00238     1088
>DP00238     1089
>DP00238     1090
>DP00238     1091
>DP00238     1092
>DP00238     1093
>DP00238     1094
>DP00238     1095
>DP00238     1096
>DP00238     1097
>DP00238     1098
>DP00238     1099
>DP00238     1100
>DP00238     1101
>DP00238     1102
>DP00238     1103
>DP00238     1104
>DP00238     1105
>DP00238     1106
>DP00238     1107
>DP00238     1108
>DP00238     1109
>DP00238     1110
>DP00238     1111
>DP00238     1112
>DP00238     1113
>DP00238     1114
>DP00238     1115
>DP00238     1116
>DP00238     1117
>DP00238     1118
>DP00238     1119
>DP00238     1120
>DP00238     1121
>DP00238     1122
>DP00238     1123
>DP00238     1124
>DP00238     1125
>DP00238     1126
>DP00238     1127
>DP00238     1128
>DP00238     1129
>DP00238     1130
>DP00238     1131
>DP00238     1132
>DP00238     1133
>DP00238     1134
>DP00238     1135
>DP00238     1136
>DP00238     1137
>DP00238     1138
>DP00238     1139
>DP00238     1140
>DP00238     1141
>DP00238     1142
>DP00238     1143
>DP00238     1144
>DP00238     1145
>DP00238     1146
>DP00238     1147
>DP00238     1148
>DP00238     1149
>DP00238     1150
>DP00238     1151
>DP00238     1152
>DP00238     1153
>DP00238     1154
>DP00238     1155
>DP00238     1156
>DP00238     1157
>DP00238     1158
>DP00238     1159
>DP00238     1160
>DP00238     1161
>DP00238     1162
>DP00238     1163
>DP00238     1164
>DP00238     1165
>DP00238     1166
>DP00238     1167
>DP00238     1168
>DP00238     1169
>DP00238     1170
>DP00238     1171
>DP00238     1172
>DP00238     1173
>DP00238     1174
>DP00238     1175
>DP00238     1176
>DP00238     1177
>DP00238     1178
>DP00238     1179
>DP00238     1180
>DP00238     1181
>DP00238     1182
>DP00238     1183
>DP00238     1184
>DP00238     1185
>DP00238     1186
>DP00238     1187
>DP00238     1188
>DP00238     1189
>DP00238     1190
>DP00238     1191
>DP00238     1192
>DP00238     1193
>DP00238     1194
>DP00238     1195
>DP00238     1196
>DP00238     1197
>DP00238     1198
>DP00238     1199
>DP00238     1200
>DP00238     1201
>DP00238     1202
>DP00238     1203
>DP00238     1204
>DP00238     1205
>DP00238     1206
>DP00238     1207
>DP00238     1208
>DP00238     1209
>DP00238     1210
>DP00238     1211
>DP00238     1212
>DP00238     1213
>DP00238     1214
>DP00238     1215
>DP00238     1216
>DP00238     1217
>DP00238     1218
>DP00238     1219
>DP00238     1220
>DP00238     1221
>DP00238     1222
>DP00238     1223
>DP00238     1224
>DP00238     1225
>DP00238     1226
>DP00238     1227
>DP00238     1228
>DP00238     1229
>DP00238     1230
>DP00238     1231
>DP00238     1232
>DP00238     1233
>DP00238     1234
>DP00238     1235
>DP00238     1236
>DP00238     1237
>DP00238     1238
>DP00238     1239
>DP00238     1240
>DP00238     1241
>DP00238     1242
>DP00238     1243
>DP00238     1244
>DP00238     1245
>DP00238     1246
>DP00238     1247
>DP00238     1248
>DP00238     1249
>DP00238     1250
>DP00238     1251
>DP00238     1252
>DP00238     1253
>DP00238     1254
>DP00238     1255
>DP00238     1256
>DP00238     1257
>DP00238     1258
>DP00238     1259
>DP00238     1260
>DP00238     1261
>DP00238     1262
>DP00238     1263
>DP00238     1264
>DP00238     1265
>DP00238     1266
>DP00238     1267
>DP00238     1268
>DP00238     1269
>DP00238     1270
>DP00238     1271
>DP00238     1272
>DP00238     1273
>DP00238     1274
>DP00238     1275
>DP00238     1276
>DP00238     1277
>DP00238     1278
>DP00238     1279
>DP00238     1280
>DP00238     1281
>DP00238     1282
>DP00238     1283
>DP00238     1284
>DP00238     1285
>DP00238     1286
>DP00238     1287
>DP00238     1288
>DP00238     1289
>DP00238     1290
>DP00238     1291
>DP00238     1292
>DP00238     1293
>DP00238     1294
>DP00238     1295
>DP00238     1296
>DP00238     1297
>DP00238     1298
>DP00238     1299
>DP00238     1300
>DP00238     1301
>DP00238     1302
>DP00238     1303
>DP00238     1304
>DP00238     1305
>DP00238     1306
>DP00238     1307
>DP00238     1308
>DP00238     1309
>DP00238     1310
>DP00238     1311
>DP00238     1312
>DP00238     1313
>DP00238     1314
>DP00238     1315
>DP00238     1316
>DP00238     1317
>DP00238     1318
>DP00238     1319
>DP00238     1320
>DP00238     1321
>DP00238     1322
>DP00238     1323
>DP00238     1324
>DP00238     1325
>DP00238     1326
>DP00238     1327
>DP00238     1328
>DP00238     1329
>DP00238     1330
>DP00238     1331
>DP00238     1332
>DP00238     1333
>DP00238     1334
>DP00238     1335
>DP00238     1336
>DP00238     1337
>DP00238     1338
>DP00238     1339
>DP00238     1340
>DP00238     1341
>DP00238     1342
>DP00238     1343
>DP00238     1344
>DP00238     1345
>DP00238     1346
>DP00238     1347
>DP00238     1348
>DP00238     1349
>DP00238     1350
>DP00238     1351
>DP00238     1352
>DP00238     1353
>DP00238     1354
>DP00238     1355
>DP00238     1356
>DP00238     1357
>DP00238     1358
>DP00238     1359
>DP00238     1360
>DP00238     1361
>DP00238     1362
>DP00238     1363
>DP00238     1364
>DP00238     1365
>DP00238     1366
>DP00238     1367
>DP00238     1368
>DP00238     1369
>DP00238     1370
>DP00238     1371
>DP00238     1372
>DP00238     1373
>DP00238     1374
>DP00238     1375
>DP00238     1376
>DP00238     1377
>DP00238     1378
>DP00238     1379
>DP00238     1380
>DP00238     1381
>DP00238     1382
>DP00238     1383
>DP00238     1384
>DP00238     1385
>DP00238     1386
>DP00238     1387
>DP00238     1388
>DP00238     1389
>DP00238     1390
>DP00238     1391
>DP00238     1392
>DP00238     1393
>DP00238     1394
>DP00238     1395
>DP00238     1396
>DP00238     1397
>DP00238     1398
>DP00238     1399
>DP00238     1400
>DP00238     1401
>DP00238     1402
>DP00238     1403
>DP00238     1404
>DP00238     1405
>DP00238     1406
>DP00238     1407
>DP00238     1408
>DP00238     1409
>DP00238     1410
>DP00238     1411
>DP00238     1412
>DP00238     1413
>DP00238     1414
>DP00238     1415
>DP00238     1416
>DP00238     1417
>DP00238     1418
>DP00238     1419
>DP00238     1420
>DP00238     1421
>DP00238     1422
>DP00238     1423
>DP00238     1424
>DP00238     1425
>DP00238     1426
>DP00238     1427
>DP00238     1428
>DP00238     1429
>DP00238     1430
>DP00238     1431
>DP00238     1432
>DP00238     1433
>DP00238     1434
>DP00238     1435
>DP00238     1436
>DP00238     1437
>DP00238     1438
>DP00238     1439
>DP00238     1440
>DP00238     1441
>DP00238     1442
>DP00238     1443
>DP00238     1444
>DP00238     1445
>DP00238     1446
>DP00238     1447
>DP00238     1448
>DP00238     1449
>DP00238     1450
>DP00238     1451
>DP00238     1452
>DP00238     1453
>DP00238     1454
>DP00238     1455
>DP00238     1456
>DP00238     1457
>DP00238     1458
>DP00238     1459
>DP00238     1460
>DP00238     1461
>DP00238     1462
>DP00238     1463
>DP00238     1464
>DP00238     1465
>DP00238     1466
>DP00238     1467
>DP00238     1468
>DP00238     1469
>DP00238     1470
>DP00238     1471
>DP00238     1472
>DP00238     1473
>DP00238     1474
>DP00238     1475
>DP00238     1476
>DP00238     1477
>DP00238     1478
>DP00238     1479
>DP00238     1480
>DP00238     1481
>DP00238     1482
>DP00238     1483
>DP00238     1484
>DP00238     1485
>DP00238     1486
>DP00238     1487
>DP00238     1488
>DP00238     1489
>DP00238     1490
>DP00238     1491
>DP00238     1492
>DP00238     1493
>DP00238     1494
>DP00238     1495
>DP00238     1496
>DP00238     1497
>DP00238     1498
>DP00238     1499
>DP00238     1500
>DP00238     1501
>DP00238     1502
>DP00238     1503
>DP00238     1504
>DP00238     1505
>DP00238     1506
>DP00238     1507
>DP00238     1508
>DP00238     1509
>DP00238     1510
>DP00238     1511
>DP00238     1512
>DP00238     1513
>DP00238     1514
>DP00238     1515
>DP00238     1516
>DP00238     1517
>DP00238     1518
>DP00238     1519
>DP00238     1520
>DP00238     1521
>DP00238     1522
>DP00238     1523
>DP00238     1524
>DP00238     1525
>DP00238     1526
>DP00238     1527
>DP00238     1528
>DP00238     1529
>DP00238     1530
>DP00238     1531
>DP00238     1532
>DP00238     1533
>DP00238     1534
>DP00238     1535
>DP00238     1536
>DP00238     1537
>DP00238     1538
>DP00238     1539
>DP00238     1540
>DP00238     1541
>DP00238     1542
>DP00238     1543
>DP00238     1544
>DP00238     1545
>DP00238     1546
>DP00238     1547
>DP00238     1548
>DP00238     1549
>DP00238     1550
>DP00238     1551
>DP00238     1552
>DP00238     1553
>DP00238     1554
>DP00238     1555
>DP00238     1556
>DP00238     1557
>DP00238     1558
>DP00238     1559
>DP00238     1560
>DP00238     1561
>DP00238     1562
>DP00238     1563
>DP00238     1564
>DP00238     1565
>DP00238     1566
>DP00238     1567
>DP00238     1568
>DP00238     1569
>DP00238     1570
>DP00238     1571
>DP00238     1572
>DP00238     1573
>DP00238     1574
>DP00238     1575
>DP00238     1576
>DP00238     1577
>DP00238     1578
>DP00238     1579
>DP00238     1580
>DP00238     1581
>DP00238     1582
>DP00238     1583
>DP00238     1584
>DP00238     1585
>DP00238     1586
>DP00238     1587
>DP00238     1588
>DP00238     1589
>DP00238     1590
>DP00238     1591
>DP00238     1592
>DP00238     1593
>DP00238     1594
>DP00238     1595
>DP00238     1596
>DP00238     1597
>DP00238     1598
>DP00238     1599
>DP00238     1600
>DP00238     1601
>DP00238     1602
>DP00238     1603
>DP00238     1604
>DP00238     1605
>DP00238     1606
>DP00238     1607
>DP00238     1608
>DP00238     1609
>DP00238     1610
>DP00238     1611
>DP00238     1612
>DP00238     1613
>DP00238     1614
>DP00238     1615
>DP00238     1616
>DP00238     1617
>DP00238     1618
>DP00238     1619
>DP00238     1620
>DP00238     1621
>DP00238     1622
>DP00238     1623
>DP00238     1624
>DP00238     1625
>DP00238     1626
>DP00238     1627
>DP00238     1628
>DP00238     1629
>DP00238     1630
>DP00238     1631
>DP00238     1632
>DP00238     1633
>DP00238     1634
>DP00238     1635
>DP00238     1636
>DP00238     1637
>DP00238     1638
>DP00238     1639
>DP00238     1640
>DP00238     1641
>DP00238     1642
>DP00238     1643
>DP00238     1644
>DP00238     1645
>DP00238     1646
>DP00238     1647
>DP00238     1648
>DP00238     1649
>DP00238     1755
>DP00238     1756
>DP00238     1757
>DP00238     1758
>DP00238     1773
>DP00238     1774
>DP00238     1775
>DP00238     1776
>DP00238     1777
>DP00238     1799
>DP00238     1800
>DP00238     1801
>DP00238     1802
>DP00238     1803
>DP00238     1804
>DP00238     1812
>DP00238     1813
>DP00238     1814
>DP00238     1815
>DP00238     1816
>DP00238     1817
>DP00238     1818
>DP00238     1819
>DP00238     1820
>DP00238     1821
>DP00238     1822
>DP00238     1823
>DP00239     1
>DP00239     2
>DP00239     3
>DP00239     4
>DP00239     5
>DP00239     6
>DP00239     7
>DP00239     8
>DP00239     9
>DP00239     10
>DP00239     11
>DP00239     12
>DP00239     13
>DP00239     14
>DP00239     15
>DP00239     16
>DP00239     17
>DP00239     18
>DP00239     19
>DP00239     20
>DP00239     21
>DP00239     22
>DP00239     23
>DP00239     24
>DP00239     25
>DP00239     26
>DP00239     27
>DP00239     638
>DP00239     639
>DP00241     409
>DP00241     410
>DP00241     411
>DP00241     412
>DP00241     413
>DP00241     414
>DP00241     415
>DP00241     416
>DP00241     417
>DP00241     418
>DP00241     419
>DP00241     420
>DP00241     421
>DP00241     422
>DP00241     423
>DP00241     424
>DP00241     425
>DP00241     426
>DP00241     427
>DP00241     428
>DP00241     429
>DP00241     430
>DP00241     431
>DP00241     432
>DP00241     433
>DP00241     434
>DP00241     435
>DP00241     436
>DP00241     437
>DP00241     438
>DP00241     439
>DP00241     440
>DP00241     441
>DP00241     442
>DP00241     443
>DP00241     444
>DP00241     445
>DP00241     446
>DP00241     447
>DP00241     448
>DP00241     449
>DP00241     450
>DP00241     451
>DP00241     452
>DP00241     453
>DP00241     454
>DP00241     455
>DP00241     456
>DP00241     457
>DP00241     458
>DP00241     459
>DP00241     460
>DP00241     461
>DP00241     462
>DP00241     463
>DP00241     464
>DP00241     465
>DP00241     466
>DP00241     467
>DP00241     468
>DP00241     469
>DP00241     470
>DP00241     471
>DP00241     472
>DP00241     473
>DP00241     474
>DP00241     475
>DP00241     476
>DP00241     477
>DP00241     478
>DP00241     479
>DP00241     480
>DP00241     481
>DP00241     482
>DP00241     483
>DP00241     484
>DP00241     485
>DP00241     486
>DP00241     487
>DP00241     488
>DP00241     489
>DP00241     490
>DP00241     491
>DP00241     492
>DP00241     493
>DP00241     494
>DP00241     495
>DP00241     496
>DP00241     497
>DP00241     498
>DP00241     499
>DP00241     500
>DP00241     501
>DP00241     502
>DP00241     503
>DP00241     504
>DP00241     505
>DP00241     506
>DP00241     507
>DP00241     508
>DP00241     509
>DP00241     510
>DP00241     511
>DP00241     512
>DP00241     513
>DP00241     514
>DP00241     515
>DP00241     516
>DP00241     517
>DP00241     518
>DP00241     519
>DP00241     520
>DP00241     521
>DP00241     522
>DP00241     523
>DP00241     524
>DP00241     525
>DP00241     526
>DP00241     527
>DP00241     528
>DP00241     529
>DP00241     530
>DP00241     531
>DP00241     532
>DP00241     533
>DP00241     534
>DP00241     535
>DP00241     536
>DP00241     537
>DP00241     538
>DP00241     539
>DP00241     540
>DP00241     541
>DP00241     542
>DP00241     543
>DP00241     544
>DP00241     545
>DP00241     546
>DP00241     547
>DP00241     548
>DP00241     549
>DP00241     550
>DP00241     551
>DP00241     552
>DP00241     553
>DP00241     554
>DP00241     555
>DP00241     556
>DP00241     557
>DP00241     558
>DP00241     559
>DP00241     560
>DP00241     561
>DP00241     562
>DP00241     563
>DP00241     564
>DP00241     565
>DP00241     566
>DP00241     567
>DP00241     568
>DP00241     569
>DP00241     570
>DP00241     571
>DP00241     572
>DP00241     573
>DP00241     574
>DP00241     575
>DP00241     576
>DP00241     577
>DP00241     578
>DP00241     579
>DP00241     580
>DP00241     581
>DP00241     582
>DP00241     583
>DP00241     584
>DP00241     585
>DP00241     586
>DP00241     587
>DP00241     588
>DP00241     589
>DP00241     590
>DP00241     591
>DP00241     592
>DP00241     593
>DP00241     594
>DP00241     595
>DP00241     596
>DP00241     597
>DP00241     598
>DP00241     599
>DP00241     600
>DP00241     601
>DP00241     602
>DP00241     603
>DP00241     604
>DP00241     605
>DP00241     606
>DP00241     607
>DP00241     608
>DP00241     609
>DP00241     610
>DP00241     611
>DP00241     612
>DP00241     613
>DP00241     614
>DP00241     615
>DP00241     616
>DP00241     617
>DP00241     618
>DP00241     619
>DP00241     620
>DP00241     621
>DP00241     622
>DP00241     623
>DP00241     624
>DP00241     625
>DP00241     626
>DP00241     627
>DP00241     628
>DP00241     629
>DP00241     630
>DP00241     631
>DP00241     632
>DP00241     633
>DP00241     634
>DP00241     635
>DP00241     636
>DP00241     637
>DP00241     638
>DP00241     639
>DP00241     640
>DP00241     641
>DP00241     642
>DP00241     643
>DP00241     644
>DP00241     645
>DP00241     646
>DP00241     647
>DP00241     648
>DP00241     649
>DP00241     650
>DP00241     651
>DP00241     652
>DP00241     653
>DP00241     654
>DP00241     655
>DP00241     656
>DP00241     657
>DP00241     658
>DP00241     659
>DP00241     660
>DP00241     661
>DP00241     662
>DP00241     663
>DP00241     664
>DP00241     665
>DP00241     666
>DP00241     667
>DP00241     668
>DP00241     669
>DP00241     670
>DP00241     671
>DP00241     672
>DP00241     673
>DP00241     674
>DP00241     675
>DP00241     676
>DP00241     677
>DP00241     678
>DP00241     679
>DP00241     680
>DP00241     681
>DP00241     682
>DP00241     683
>DP00241     684
>DP00241     685
>DP00241     686
>DP00241     687
>DP00241     688
>DP00241     689
>DP00241     690
>DP00241     691
>DP00241     692
>DP00241     693
>DP00241     694
>DP00241     695
>DP00241     696
>DP00241     697
>DP00241     698
>DP00241     699
>DP00241     700
>DP00241     701
>DP00241     702
>DP00241     703
>DP00241     704
>DP00241     705
>DP00241     706
>DP00241     707
>DP00241     708
>DP00241     709
>DP00241     710
>DP00241     711
>DP00241     712
>DP00241     713
>DP00241     714
>DP00241     715
>DP00241     716
>DP00241     717
>DP00241     718
>DP00241     719
>DP00241     720
>DP00241     721
>DP00241     722
>DP00241     723
>DP00241     724
>DP00241     725
>DP00241     726
>DP00242     1
>DP00242     2
>DP00242     3
>DP00242     4
>DP00242     5
>DP00242     6
>DP00242     7
>DP00242     8
>DP00242     9
>DP00242     10
>DP00242     11
>DP00242     12
>DP00242     13
>DP00242     14
>DP00242     15
>DP00242     16
>DP00242     17
>DP00242     18
>DP00242     19
>DP00242     20
>DP00242     21
>DP00242     22
>DP00242     23
>DP00242     24
>DP00242     25
>DP00242     26
>DP00242     27
>DP00242     28
>DP00242     29
>DP00242     30
>DP00242     31
>DP00242     32
>DP00242     33
>DP00242     34
>DP00242     35
>DP00242     36
>DP00242     37
>DP00242     38
>DP00242     39
>DP00242     40
>DP00242     41
>DP00242     42
>DP00242     43
>DP00242     44
>DP00242     45
>DP00242     46
>DP00242     47
>DP00242     48
>DP00242     49
>DP00242     50
>DP00242     51
>DP00242     52
>DP00242     53
>DP00242     54
>DP00242     55
>DP00242     56
>DP00242     57
>DP00242     58
>DP00242     59
>DP00242     60
>DP00242     61
>DP00242     62
>DP00242     63
>DP00242     64
>DP00242     65
>DP00242     66
>DP00242     67
>DP00242     68
>DP00242     69
>DP00242     70
>DP00242     71
>DP00242     72
>DP00242     73
>DP00242     74
>DP00242     75
>DP00242     76
>DP00242     77
>DP00242     78
>DP00242     79
>DP00242     80
>DP00242     81
>DP00242     82
>DP00242     83
>DP00243     158
>DP00243     168
>DP00243     169
>DP00243     170
>DP00243     171
>DP00243     172
>DP00243     173
>DP00243     174
>DP00243     175
>DP00243     176
>DP00243     177
>DP00243     178
>DP00243     179
>DP00243     206
>DP00243     207
>DP00243     208
>DP00243     209
>DP00243     210
>DP00243     211
>DP00243     212
>DP00243     213
>DP00243     214
>DP00243     215
>DP00243     216
>DP00243     217
>DP00243     218
>DP00243     219
>DP00246     1
>DP00246     2
>DP00246     3
>DP00246     4
>DP00246     5
>DP00246     6
>DP00246     7
>DP00246     8
>DP00246     9
>DP00246     10
>DP00246     11
>DP00246     12
>DP00246     13
>DP00246     14
>DP00246     15
>DP00246     16
>DP00246     17
>DP00246     18
>DP00246     19
>DP00246     20
>DP00246     21
>DP00246     22
>DP00246     23
>DP00246     24
>DP00246     25
>DP00246     26
>DP00246     27
>DP00246     28
>DP00246     29
>DP00246     30
>DP00246     31
>DP00246     32
>DP00246     33
>DP00246     34
>DP00246     35
>DP00246     36
>DP00246     37
>DP00246     38
>DP00246     39
>DP00246     40
>DP00246     41
>DP00246     42
>DP00246     43
>DP00246     44
>DP00246     45
>DP00246     46
>DP00246     47
>DP00246     48
>DP00246     49
>DP00246     50
>DP00248     1
>DP00248     2
>DP00248     3
>DP00248     4
>DP00248     5
>DP00248     6
>DP00248     7
>DP00248     8
>DP00248     582
>DP00249     103
>DP00249     104
>DP00249     105
>DP00249     106
>DP00249     107
>DP00249     108
>DP00249     109
>DP00249     110
>DP00249     111
>DP00249     112
>DP00249     113
>DP00249     114
>DP00249     115
>DP00249     116
>DP00249     117
>DP00249     118
>DP00249     119
>DP00249     120
>DP00249     121
>DP00249     122
>DP00249     123
>DP00249     124
>DP00249     125
>DP00249     126
>DP00249     127
>DP00249     128
>DP00249     129
>DP00249     130
>DP00249     131
>DP00249     132
>DP00249     133
>DP00249     134
>DP00249     135
>DP00249     136
>DP00249     137
>DP00249     138
>DP00249     139
>DP00249     140
>DP00249     141
>DP00249     142
>DP00249     143
>DP00249     144
>DP00249     145
>DP00249     146
>DP00249     147
>DP00249     148
>DP00249     149
>DP00249     150
>DP00249     151
>DP00249     152
>DP00249     153
>DP00249     154
>DP00249     155
>DP00249     156
>DP00249     157
>DP00249     158
>DP00250     44
>DP00250     45
>DP00250     46
>DP00250     47
>DP00250     48
>DP00250     49
>DP00250     50
>DP00250     51
>DP00250     52
>DP00250     53
>DP00250     54
>DP00251     144
>DP00251     145
>DP00251     146
>DP00251     147
>DP00251     148
>DP00251     149
>DP00251     150
>DP00251     151
>DP00251     152
>DP00251     153
>DP00251     154
>DP00251     155
>DP00251     156
>DP00251     157
>DP00251     158
>DP00251     159
>DP00251     160
>DP00251     161
>DP00251     162
>DP00251     163
>DP00251     164
>DP00251     165
>DP00251     166
>DP00251     167
>DP00251     168
>DP00251     169
>DP00251     170
>DP00251     171
>DP00251     172
>DP00251     173
>DP00251     174
>DP00251     175
>DP00251     176
>DP00251     177
>DP00251     178
>DP00251     179
>DP00251     180
>DP00251     181
>DP00251     182
>DP00251     183
>DP00251     184
>DP00251     185
>DP00251     186
>DP00251     187
>DP00251     188
>DP00251     189
>DP00251     190
>DP00251     191
>DP00251     192
>DP00251     193
>DP00251     194
>DP00251     195
>DP00251     196
>DP00251     197
>DP00251     198
>DP00251     199
>DP00251     200
>DP00251     201
>DP00251     202
>DP00251     203
>DP00251     204
>DP00251     205
>DP00251     206
>DP00251     207
>DP00251     208
>DP00251     209
>DP00251     210
>DP00251     211
>DP00251     212
>DP00251     213
>DP00251     214
>DP00251     215
>DP00251     216
>DP00251     217
>DP00251     218
>DP00251     219
>DP00251     220
>DP00251     221
>DP00251     222
>DP00251     223
>DP00251     224
>DP00251     225
>DP00251     226
>DP00251     227
>DP00251     228
>DP00251     229
>DP00251     230
>DP00251     231
>DP00251     232
>DP00251     233
>DP00251     234
>DP00251     235
>DP00251     236
>DP00251     237
>DP00251     238
>DP00251     239
>DP00251     240
>DP00251     241
>DP00251     242
>DP00251     243
>DP00251     244
>DP00251     245
>DP00251     246
>DP00251     247
>DP00251     248
>DP00251     249
>DP00251     250
>DP00251     251
>DP00251     252
>DP00251     253
>DP00251     254
>DP00251     255
>DP00251     256
>DP00251     257
>DP00251     258
>DP00251     259
>DP00251     260
>DP00251     261
>DP00251     262
>DP00251     263
>DP00251     264
>DP00251     265
>DP00251     266
>DP00251     267
>DP00251     268
>DP00251     269
>DP00251     270
>DP00251     271
>DP00251     272
>DP00251     273
>DP00251     274
>DP00251     275
>DP00251     276
>DP00251     277
>DP00251     278
>DP00251     279
>DP00251     280
>DP00251     281
>DP00251     282
>DP00251     283
>DP00251     284
>DP00251     285
>DP00251     286
>DP00251     287
>DP00251     288
>DP00251     289
>DP00251     290
>DP00251     291
>DP00251     292
>DP00251     293
>DP00251     294
>DP00251     295
>DP00251     296
>DP00251     297
>DP00251     298
>DP00251     299
>DP00251     300
>DP00251     301
>DP00251     302
>DP00251     303
>DP00251     304
>DP00251     305
>DP00251     306
>DP00251     307
>DP00251     308
>DP00251     309
>DP00251     310
>DP00251     311
>DP00251     312
>DP00251     313
>DP00251     314
>DP00251     315
>DP00251     316
>DP00251     317
>DP00251     318
>DP00251     319
>DP00251     320
>DP00251     321
>DP00251     322
>DP00251     323
>DP00251     324
>DP00251     325
>DP00251     326
>DP00251     327
>DP00251     328
>DP00251     329
>DP00251     330
>DP00251     331
>DP00251     332
>DP00251     333
>DP00251     334
>DP00251     335
>DP00251     336
>DP00251     337
>DP00251     338
>DP00251     339
>DP00251     340
>DP00251     341
>DP00251     342
>DP00251     343
>DP00251     344
>DP00251     345
>DP00251     346
>DP00251     347
>DP00251     348
>DP00251     349
>DP00251     350
>DP00251     351
>DP00251     352
>DP00251     353
>DP00251     354
>DP00251     355
>DP00251     356
>DP00251     357
>DP00251     358
>DP00251     359
>DP00251     360
>DP00251     361
>DP00251     362
>DP00251     363
>DP00251     364
>DP00251     365
>DP00251     366
>DP00251     367
>DP00251     368
>DP00251     369
>DP00251     370
>DP00251     371
>DP00251     372
>DP00251     373
>DP00251     374
>DP00251     375
>DP00251     376
>DP00251     377
>DP00251     378
>DP00251     379
>DP00251     380
>DP00251     381
>DP00251     382
>DP00251     383
>DP00251     384
>DP00251     385
>DP00251     386
>DP00251     387
>DP00251     388
>DP00251     389
>DP00251     390
>DP00251     391
>DP00251     392
>DP00251     393
>DP00251     394
>DP00251     395
>DP00251     396
>DP00251     397
>DP00251     398
>DP00251     399
>DP00251     400
>DP00251     401
>DP00251     402
>DP00251     403
>DP00251     404
>DP00251     405
>DP00251     406
>DP00251     407
>DP00251     408
>DP00251     409
>DP00251     410
>DP00251     411
>DP00251     412
>DP00251     413
>DP00251     414
>DP00251     415
>DP00251     416
>DP00251     417
>DP00251     418
>DP00251     419
>DP00251     420
>DP00251     421
>DP00251     422
>DP00251     423
>DP00251     424
>DP00251     425
>DP00251     426
>DP00251     427
>DP00251     428
>DP00251     429
>DP00251     430
>DP00251     431
>DP00251     432
>DP00251     433
>DP00251     434
>DP00251     435
>DP00251     436
>DP00251     437
>DP00251     438
>DP00251     439
>DP00251     440
>DP00251     441
>DP00251     442
>DP00251     443
>DP00251     444
>DP00251     445
>DP00251     446
>DP00251     447
>DP00251     448
>DP00251     449
>DP00251     450
>DP00251     451
>DP00251     452
>DP00251     453
>DP00251     454
>DP00251     455
>DP00251     456
>DP00251     457
>DP00251     458
>DP00251     459
>DP00251     460
>DP00251     461
>DP00251     462
>DP00251     463
>DP00251     464
>DP00251     465
>DP00251     466
>DP00251     467
>DP00251     468
>DP00251     469
>DP00251     470
>DP00251     471
>DP00251     472
>DP00251     473
>DP00251     474
>DP00251     475
>DP00251     476
>DP00251     477
>DP00251     478
>DP00251     479
>DP00251     480
>DP00251     481
>DP00251     482
>DP00251     483
>DP00251     484
>DP00251     485
>DP00251     486
>DP00251     487
>DP00251     488
>DP00251     489
>DP00251     490
>DP00251     491
>DP00251     492
>DP00251     493
>DP00251     494
>DP00251     495
>DP00251     496
>DP00251     497
>DP00251     498
>DP00251     499
>DP00251     500
>DP00251     501
>DP00251     502
>DP00251     503
>DP00251     504
>DP00251     505
>DP00251     506
>DP00251     507
>DP00251     508
>DP00251     509
>DP00251     510
>DP00251     511
>DP00251     512
>DP00251     513
>DP00251     514
>DP00251     515
>DP00251     516
>DP00251     517
>DP00251     518
>DP00251     519
>DP00251     520
>DP00251     521
>DP00251     522
>DP00251     523
>DP00251     524
>DP00251     525
>DP00251     526
>DP00251     527
>DP00251     528
>DP00251     529
>DP00251     530
>DP00251     531
>DP00251     532
>DP00251     533
>DP00251     534
>DP00251     535
>DP00251     536
>DP00251     537
>DP00251     538
>DP00251     539
>DP00251     540
>DP00251     541
>DP00251     542
>DP00251     543
>DP00251     544
>DP00251     545
>DP00251     546
>DP00251     547
>DP00251     548
>DP00251     549
>DP00251     550
>DP00251     551
>DP00251     552
>DP00251     553
>DP00251     554
>DP00251     555
>DP00251     556
>DP00251     557
>DP00251     558
>DP00251     559
>DP00251     560
>DP00251     561
>DP00251     562
>DP00251     563
>DP00251     564
>DP00251     565
>DP00251     566
>DP00251     567
>DP00251     568
>DP00251     569
>DP00251     570
>DP00251     571
>DP00251     572
>DP00251     573
>DP00251     574
>DP00251     575
>DP00252     57
>DP00252     58
>DP00252     59
>DP00252     60
>DP00252     61
>DP00252     62
>DP00252     63
>DP00252     64
>DP00252     184
>DP00252     185
>DP00253     1
>DP00253     2
>DP00253     3
>DP00253     4
>DP00253     5
>DP00253     6
>DP00253     7
>DP00253     8
>DP00253     9
>DP00253     10
>DP00253     11
>DP00253     12
>DP00253     13
>DP00253     14
>DP00253     15
>DP00253     16
>DP00253     17
>DP00253     18
>DP00253     19
>DP00253     20
>DP00253     21
>DP00253     22
>DP00253     23
>DP00253     24
>DP00253     25
>DP00253     26
>DP00253     27
>DP00253     28
>DP00253     29
>DP00253     30
>DP00253     31
>DP00253     32
>DP00253     33
>DP00253     34
>DP00253     35
>DP00253     36
>DP00253     37
>DP00253     38
>DP00253     39
>DP00253     40
>DP00253     41
>DP00253     42
>DP00253     43
>DP00253     44
>DP00253     45
>DP00253     46
>DP00253     47
>DP00253     48
>DP00253     49
>DP00253     50
>DP00253     51
>DP00253     52
>DP00253     53
>DP00253     54
>DP00253     55
>DP00253     56
>DP00253     57
>DP00253     58
>DP00253     59
>DP00253     60
>DP00253     61
>DP00253     62
>DP00253     63
>DP00253     64
>DP00253     65
>DP00253     66
>DP00253     67
>DP00253     68
>DP00253     69
>DP00253     70
>DP00253     71
>DP00253     72
>DP00253     73
>DP00253     74
>DP00253     75
>DP00253     76
>DP00253     77
>DP00253     78
>DP00253     79
>DP00253     80
>DP00253     81
>DP00253     82
>DP00253     83
>DP00253     84
>DP00253     85
>DP00253     86
>DP00253     87
>DP00253     88
>DP00253     89
>DP00253     90
>DP00253     91
>DP00253     92
>DP00253     93
>DP00253     94
>DP00253     95
>DP00253     96
>DP00253     97
>DP00253     98
>DP00253     99
>DP00253     100
>DP00253     101
>DP00253     102
>DP00253     103
>DP00253     104
>DP00253     105
>DP00253     106
>DP00253     107
>DP00253     108
>DP00253     109
>DP00253     110
>DP00253     111
>DP00253     112
>DP00253     113
>DP00253     114
>DP00253     115
>DP00253     116
>DP00253     117
>DP00253     118
>DP00253     119
>DP00253     120
>DP00253     121
>DP00253     122
>DP00253     123
>DP00253     124
>DP00253     125
>DP00253     126
>DP00253     127
>DP00253     128
>DP00253     129
>DP00253     130
>DP00253     131
>DP00253     132
>DP00253     133
>DP00253     134
>DP00253     135
>DP00253     136
>DP00253     137
>DP00253     138
>DP00253     139
>DP00253     140
>DP00253     141
>DP00253     142
>DP00253     143
>DP00253     144
>DP00253     145
>DP00253     146
>DP00253     147
>DP00253     148
>DP00253     149
>DP00253     150
>DP00253     151
>DP00253     152
>DP00253     153
>DP00253     154
>DP00253     155
>DP00253     156
>DP00253     157
>DP00253     158
>DP00253     159
>DP00253     160
>DP00253     161
>DP00253     162
>DP00253     163
>DP00253     164
>DP00253     165
>DP00253     166
>DP00253     167
>DP00253     168
>DP00253     169
>DP00253     170
>DP00253     171
>DP00253     172
>DP00253     173
>DP00253     174
>DP00253     175
>DP00253     176
>DP00253     177
>DP00253     178
>DP00253     179
>DP00253     180
>DP00253     181
>DP00253     182
>DP00253     183
>DP00253     184
>DP00253     185
>DP00253     186
>DP00253     187
>DP00253     188
>DP00253     189
>DP00253     190
>DP00253     191
>DP00253     192
>DP00253     193
>DP00253     194
>DP00253     195
>DP00253     196
>DP00253     197
>DP00253     198
>DP00253     199
>DP00253     200
>DP00253     201
>DP00253     202
>DP00253     203
>DP00253     204
>DP00253     205
>DP00253     206
>DP00253     207
>DP00253     208
>DP00253     209
>DP00253     210
>DP00253     211
>DP00253     212
>DP00253     213
>DP00253     214
>DP00253     215
>DP00253     216
>DP00253     217
>DP00253     218
>DP00253     219
>DP00253     220
>DP00253     221
>DP00253     222
>DP00253     223
>DP00253     224
>DP00253     225
>DP00253     226
>DP00253     227
>DP00253     228
>DP00253     229
>DP00253     230
>DP00253     231
>DP00253     232
>DP00253     233
>DP00253     234
>DP00253     235
>DP00253     236
>DP00253     237
>DP00253     238
>DP00253     239
>DP00253     240
>DP00253     241
>DP00253     242
>DP00253     243
>DP00253     244
>DP00253     245
>DP00253     246
>DP00253     247
>DP00253     248
>DP00253     249
>DP00253     250
>DP00253     251
>DP00253     252
>DP00253     253
>DP00253     254
>DP00253     255
>DP00253     256
>DP00253     257
>DP00253     258
>DP00253     259
>DP00253     260
>DP00253     261
>DP00253     262
>DP00253     263
>DP00253     264
>DP00253     265
>DP00253     266
>DP00253     267
>DP00253     268
>DP00253     269
>DP00253     270
>DP00253     271
>DP00253     272
>DP00253     273
>DP00253     274
>DP00253     275
>DP00253     276
>DP00253     277
>DP00253     278
>DP00253     279
>DP00253     280
>DP00253     281
>DP00253     282
>DP00253     283
>DP00253     284
>DP00253     285
>DP00253     286
>DP00253     287
>DP00253     288
>DP00253     289
>DP00253     290
>DP00253     291
>DP00253     292
>DP00253     293
>DP00253     294
>DP00253     295
>DP00253     296
>DP00253     297
>DP00253     298
>DP00253     299
>DP00253     300
>DP00253     301
>DP00253     302
>DP00253     303
>DP00253     304
>DP00253     305
>DP00253     306
>DP00253     307
>DP00253     308
>DP00253     309
>DP00255     1
>DP00255     2
>DP00255     3
>DP00255     4
>DP00255     5
>DP00255     6
>DP00255     25
>DP00255     26
>DP00255     27
>DP00255     28
>DP00255     29
>DP00255     136
>DP00255     137
>DP00255     138
>DP00255     139
>DP00255     140
>DP00255     141
>DP00255     142
>DP00255     143
>DP00255     144
>DP00255     145
>DP00255     146
>DP00255     147
>DP00255     148
>DP00255     149
>DP00255     150
>DP00255     151
>DP00255     152
>DP00255     153
>DP00255     154
>DP00255     155
>DP00255     156
>DP00255     157
>DP00255     158
>DP00255     159
>DP00255     160
>DP00255     161
>DP00255     162
>DP00255     163
>DP00255     164
>DP00255     165
>DP00255     166
>DP00255     167
>DP00255     168
>DP00255     169
>DP00255     170
>DP00255     171
>DP00255     172
>DP00255     173
>DP00256     1
>DP00256     2
>DP00256     3
>DP00256     4
>DP00256     5
>DP00256     6
>DP00256     7
>DP00256     8
>DP00256     9
>DP00256     10
>DP00256     11
>DP00256     12
>DP00256     13
>DP00256     14
>DP00256     15
>DP00256     16
>DP00256     17
>DP00256     18
>DP00256     19
>DP00256     20
>DP00256     21
>DP00256     22
>DP00256     23
>DP00256     24
>DP00256     25
>DP00256     26
>DP00256     27
>DP00256     28
>DP00256     29
>DP00256     30
>DP00256     31
>DP00256     32
>DP00256     33
>DP00256     34
>DP00256     35
>DP00256     36
>DP00256     37
>DP00256     38
>DP00256     39
>DP00256     40
>DP00256     41
>DP00256     42
>DP00256     43
>DP00256     44
>DP00256     45
>DP00256     46
>DP00256     47
>DP00256     48
>DP00256     49
>DP00256     50
>DP00256     51
>DP00256     52
>DP00256     53
>DP00256     54
>DP00256     55
>DP00256     56
>DP00256     57
>DP00256     58
>DP00256     59
>DP00256     60
>DP00256     61
>DP00256     62
>DP00256     63
>DP00256     64
>DP00256     65
>DP00256     66
>DP00256     67
>DP00256     68
>DP00256     69
>DP00256     70
>DP00256     71
>DP00256     72
>DP00256     73
>DP00256     74
>DP00256     75
>DP00256     76
>DP00256     77
>DP00256     78
>DP00256     79
>DP00256     80
>DP00256     81
>DP00256     82
>DP00256     83
>DP00256     84
>DP00256     85
>DP00256     86
>DP00256     87
>DP00256     88
>DP00256     89
>DP00256     90
>DP00256     91
>DP00256     92
>DP00256     93
>DP00256     94
>DP00256     95
>DP00256     96
>DP00256     97
>DP00256     98
>DP00256     99
>DP00256     100
>DP00256     101
>DP00256     102
>DP00256     103
>DP00256     104
>DP00256     105
>DP00256     106
>DP00256     107
>DP00256     108
>DP00256     109
>DP00256     110
>DP00257     35
>DP00257     36
>DP00257     37
>DP00257     38
>DP00257     39
>DP00257     89
>DP00257     90
>DP00257     91
>DP00257     92
>DP00257     93
>DP00257     94
>DP00257     95
>DP00257     96
>DP00257     97
>DP00257     98
>DP00257     99
>DP00257     100
>DP00257     101
>DP00257     102
>DP00257     103
>DP00257     104
>DP00257     105
>DP00257     106
>DP00257     107
>DP00257     108
>DP00257     109
>DP00257     110
>DP00257     111
>DP00257     112
>DP00257     113
>DP00257     114
>DP00257     115
>DP00257     116
>DP00257     117
>DP00257     118
>DP00257     119
>DP00257     120
>DP00257     121
>DP00257     122
>DP00257     123
>DP00257     124
>DP00257     125
>DP00257     172
>DP00257     173
>DP00257     174
>DP00257     175
>DP00257     176
>DP00257     177
>DP00257     191
>DP00257     192
>DP00257     193
>DP00257     194
>DP00257     195
>DP00257     196
>DP00259     64
>DP00259     65
>DP00259     66
>DP00259     78
>DP00259     79
>DP00259     80
>DP00259     88
>DP00259     89
>DP00259     90
>DP00259     91
>DP00259     92
>DP00259     119
>DP00259     120
>DP00259     121
>DP00259     122
>DP00259     123
>DP00259     124
>DP00259     125
>DP00259     147
>DP00260     1
>DP00260     2
>DP00260     3
>DP00260     4
>DP00260     5
>DP00260     6
>DP00260     7
>DP00260     8
>DP00260     9
>DP00260     10
>DP00260     11
>DP00260     12
>DP00260     13
>DP00260     14
>DP00260     15
>DP00260     16
>DP00260     17
>DP00260     18
>DP00260     19
>DP00260     20
>DP00260     21
>DP00260     22
>DP00260     23
>DP00260     24
>DP00260     25
>DP00260     26
>DP00260     27
>DP00260     28
>DP00260     29
>DP00260     30
>DP00260     31
>DP00260     32
>DP00260     33
>DP00260     34
>DP00260     35
>DP00260     36
>DP00260     37
>DP00260     38
>DP00260     39
>DP00260     40
>DP00260     41
>DP00260     42
>DP00260     43
>DP00260     44
>DP00260     45
>DP00260     46
>DP00260     47
>DP00260     48
>DP00260     49
>DP00260     50
>DP00260     51
>DP00260     52
>DP00260     53
>DP00260     54
>DP00260     55
>DP00260     56
>DP00260     57
>DP00260     58
>DP00260     59
>DP00260     60
>DP00260     61
>DP00260     62
>DP00260     63
>DP00260     64
>DP00260     65
>DP00260     66
>DP00260     67
>DP00260     68
>DP00260     69
>DP00260     70
>DP00260     71
>DP00260     72
>DP00260     73
>DP00260     74
>DP00260     75
>DP00260     76
>DP00260     77
>DP00260     78
>DP00260     79
>DP00260     80
>DP00260     81
>DP00260     82
>DP00260     83
>DP00260     84
>DP00260     85
>DP00260     86
>DP00260     87
>DP00260     88
>DP00260     89
>DP00260     90
>DP00260     91
>DP00260     92
>DP00260     93
>DP00260     94
>DP00260     95
>DP00260     96
>DP00260     97
>DP00260     98
>DP00260     99
>DP00260     100
>DP00260     101
>DP00260     102
>DP00260     103
>DP00260     104
>DP00260     105
>DP00260     106
>DP00260     107
>DP00260     108
>DP00260     109
>DP00260     110
>DP00260     111
>DP00260     112
>DP00260     113
>DP00260     114
>DP00260     115
>DP00260     116
>DP00260     117
>DP00260     118
>DP00260     119
>DP00260     120
>DP00260     121
>DP00260     122
>DP00260     123
>DP00260     124
>DP00260     125
>DP00260     126
>DP00260     127
>DP00260     128
>DP00260     129
>DP00260     130
>DP00260     131
>DP00260     132
>DP00260     133
>DP00260     134
>DP00260     135
>DP00260     136
>DP00260     137
>DP00260     138
>DP00260     139
>DP00260     140
>DP00260     141
>DP00260     142
>DP00260     143
>DP00260     144
>DP00260     145
>DP00260     146
>DP00260     147
>DP00260     148
>DP00260     149
>DP00260     150
>DP00260     151
>DP00260     152
>DP00260     153
>DP00260     154
>DP00260     155
>DP00260     156
>DP00260     157
>DP00260     158
>DP00260     159
>DP00260     160
>DP00260     161
>DP00260     162
>DP00260     163
>DP00260     164
>DP00260     165
>DP00260     166
>DP00260     167
>DP00262     403
>DP00262     404
>DP00262     405
>DP00262     406
>DP00262     407
>DP00262     408
>DP00262     409
>DP00262     410
>DP00262     411
>DP00262     412
>DP00262     413
>DP00262     414
>DP00262     415
>DP00262     416
>DP00262     417
>DP00262     418
>DP00262     419
>DP00262     420
>DP00262     421
>DP00262     422
>DP00262     423
>DP00262     424
>DP00262     425
>DP00262     426
>DP00262     427
>DP00262     428
>DP00262     429
>DP00262     430
>DP00262     431
>DP00262     432
>DP00262     433
>DP00262     434
>DP00262     435
>DP00262     436
>DP00262     437
>DP00262     438
>DP00262     439
>DP00262     440
>DP00262     441
>DP00262     442
>DP00262     443
>DP00262     444
>DP00262     445
>DP00262     446
>DP00262     447
>DP00262     448
>DP00262     449
>DP00262     450
>DP00262     451
>DP00262     452
>DP00262     453
>DP00262     454
>DP00262     455
>DP00262     456
>DP00262     457
>DP00262     458
>DP00262     459
>DP00262     460
>DP00262     461
>DP00262     462
>DP00262     463
>DP00262     464
>DP00262     465
>DP00262     466
>DP00262     467
>DP00262     468
>DP00262     469
>DP00262     470
>DP00262     471
>DP00262     472
>DP00262     473
>DP00262     474
>DP00262     475
>DP00262     476
>DP00262     477
>DP00262     478
>DP00262     479
>DP00262     480
>DP00262     481
>DP00262     482
>DP00262     483
>DP00262     484
>DP00262     485
>DP00262     486
>DP00262     487
>DP00262     488
>DP00262     489
>DP00262     490
>DP00262     491
>DP00262     492
>DP00262     493
>DP00262     494
>DP00262     495
>DP00262     496
>DP00262     497
>DP00262     498
>DP00262     499
>DP00262     500
>DP00262     501
>DP00262     502
>DP00262     503
>DP00262     504
>DP00262     505
>DP00262     506
>DP00262     507
>DP00262     508
>DP00262     509
>DP00262     510
>DP00262     511
>DP00262     512
>DP00262     513
>DP00262     514
>DP00262     515
>DP00262     516
>DP00262     517
>DP00262     518
>DP00262     519
>DP00262     520
>DP00262     521
>DP00262     522
>DP00262     523
>DP00262     524
>DP00262     525
>DP00262     526
>DP00262     527
>DP00262     528
>DP00262     529
>DP00262     530
>DP00262     531
>DP00262     532
>DP00262     533
>DP00262     534
>DP00262     535
>DP00262     536
>DP00262     537
>DP00262     538
>DP00262     539
>DP00262     540
>DP00262     541
>DP00262     542
>DP00262     543
>DP00262     544
>DP00262     545
>DP00262     546
>DP00262     547
>DP00262     548
>DP00262     549
>DP00262     550
>DP00262     551
>DP00262     552
>DP00262     553
>DP00262     554
>DP00262     555
>DP00262     556
>DP00262     557
>DP00262     558
>DP00262     559
>DP00262     560
>DP00262     561
>DP00262     562
>DP00262     563
>DP00262     564
>DP00262     565
>DP00262     566
>DP00262     567
>DP00262     568
>DP00262     569
>DP00262     570
>DP00262     571
>DP00262     572
>DP00262     573
>DP00262     574
>DP00262     575
>DP00262     576
>DP00262     577
>DP00262     578
>DP00262     579
>DP00262     580
>DP00262     581
>DP00262     582
>DP00262     583
>DP00262     584
>DP00262     585
>DP00262     586
>DP00262     587
>DP00262     588
>DP00262     589
>DP00262     590
>DP00262     591
>DP00262     592
>DP00262     593
>DP00262     594
>DP00262     595
>DP00262     596
>DP00262     597
>DP00262     598
>DP00262     599
>DP00262     600
>DP00262     601
>DP00262     602
>DP00262     603
>DP00262     604
>DP00262     605
>DP00262     606
>DP00262     607
>DP00262     608
>DP00262     609
>DP00262     610
>DP00262     611
>DP00262     612
>DP00262     613
>DP00262     614
>DP00262     615
>DP00262     616
>DP00262     617
>DP00262     618
>DP00262     619
>DP00262     620
>DP00262     621
>DP00262     622
>DP00262     623
>DP00262     624
>DP00262     625
>DP00262     626
>DP00262     627
>DP00262     628
>DP00262     629
>DP00262     630
>DP00262     631
>DP00262     632
>DP00262     633
>DP00262     634
>DP00262     635
>DP00262     636
>DP00262     637
>DP00262     638
>DP00262     639
>DP00262     640
>DP00262     641
>DP00262     642
>DP00262     643
>DP00262     644
>DP00262     645
>DP00262     646
>DP00262     647
>DP00262     648
>DP00262     649
>DP00262     650
>DP00262     651
>DP00262     652
>DP00262     653
>DP00262     654
>DP00262     655
>DP00262     656
>DP00262     657
>DP00262     658
>DP00262     659
>DP00262     660
>DP00262     661
>DP00262     662
>DP00262     663
>DP00262     664
>DP00262     665
>DP00262     666
>DP00262     667
>DP00262     668
>DP00262     669
>DP00262     670
>DP00262     671
>DP00262     672
>DP00262     673
>DP00262     674
>DP00262     675
>DP00262     676
>DP00262     677
>DP00262     678
>DP00262     679
>DP00262     680
>DP00262     681
>DP00262     682
>DP00262     683
>DP00262     684
>DP00262     685
>DP00262     686
>DP00262     687
>DP00262     688
>DP00262     689
>DP00262     690
>DP00262     691
>DP00262     692
>DP00262     693
>DP00262     694
>DP00262     695
>DP00262     696
>DP00262     697
>DP00262     698
>DP00262     776
>DP00262     777
>DP00262     778
>DP00262     779
>DP00262     780
>DP00262     781
>DP00262     782
>DP00262     783
>DP00262     784
>DP00262     785
>DP00262     786
>DP00262     787
>DP00262     788
>DP00262     789
>DP00262     790
>DP00262     791
>DP00262     792
>DP00262     793
>DP00262     794
>DP00262     795
>DP00262     796
>DP00262     797
>DP00262     798
>DP00262     799
>DP00262     800
>DP00262     801
>DP00262     802
>DP00262     803
>DP00262     804
>DP00262     805
>DP00262     806
>DP00262     807
>DP00262     808
>DP00262     809
>DP00262     810
>DP00262     811
>DP00262     812
>DP00262     813
>DP00262     814
>DP00262     815
>DP00262     816
>DP00262     817
>DP00262     818
>DP00262     819
>DP00262     820
>DP00262     821
>DP00262     822
>DP00262     823
>DP00262     824
>DP00262     825
>DP00262     826
>DP00263     29
>DP00263     30
>DP00263     31
>DP00263     32
[truncated: 1,059,200 more chars]
