# Supplementary material for: A Novel Method of Predicting Protein Disordered Regions Based on Sequence Features
Source: Biomed Res Int. 2013 Apr 22;2013:414327. doi: 10.1155/2013/414327 (PMC3654632; doi:10.1155/2013/414327)
Supplement: Supplementary file 2 [file 414327.f2.txt]

Online Supporting Information S2. 
The testing dataset contains 54,582 ordered samples and 11,734 disordered samples of amino acid residues by 21-sliding window.

ID           site   dis/ord ("0" means ordered region and "1" means the disordered region)
>DP00183      1      0
>DP00183      2      0
>DP00183      3      0
>DP00183      4      0
>DP00183      5      0
>DP00183      6      0
>DP00183      7      0
>DP00183      8      0
>DP00183      9      0
>DP00183      10      0
>DP00183      11      0
>DP00183      12      0
>DP00183      13      0
>DP00183      14      0
>DP00183      15      0
>DP00183      16      0
>DP00183      17      0
>DP00183      18      0
>DP00183      19      0
>DP00183      20      0
>DP00183      21      0
>DP00183      22      0
>DP00183      23      0
>DP00183      24      0
>DP00183      25      0
>DP00183      26      0
>DP00183      27      0
>DP00183      28      0
>DP00183      29      0
>DP00183      30      0
>DP00183      31      0
>DP00183      32      0
>DP00183      33      0
>DP00183      34      0
>DP00183      35      0
>DP00183      36      0
>DP00183      37      0
>DP00183      38      0
>DP00183      39      0
>DP00183      40      0
>DP00183      41      0
>DP00183      42      0
>DP00183      43      0
>DP00183      44      0
>DP00183      45      0
>DP00183      46      0
>DP00183      47      0
>DP00183      48      0
>DP00183      49      0
>DP00183      50      0
>DP00183      51      0
>DP00183      52      0
>DP00183      53      0
>DP00183      54      0
>DP00183      55      0
>DP00183      56      0
>DP00183      57      0
>DP00183      58      0
>DP00183      59      0
>DP00183      60      0
>DP00183      61      0
>DP00183      62      0
>DP00183      63      0
>DP00183      64      0
>DP00183      65      0
>DP00183      66      0
>DP00183      67      0
>DP00183      68      0
>DP00183      69      0
>DP00183      70      0
>DP00183      71      0
>DP00183      72      0
>DP00183      73      0
>DP00183      74      0
>DP00183      75      0
>DP00183      76      0
>DP00183      77      0
>DP00183      78      0
>DP00183      79      0
>DP00183      80      0
>DP00183      81      0
>DP00183      82      0
>DP00183      83      0
>DP00183      84      0
>DP00183      85      0
>DP00183      86      0
>DP00183      87      0
>DP00183      88      0
>DP00183      89      0
>DP00183      90      0
>DP00183      91      0
>DP00183      92      0
>DP00183      93      0
>DP00183      94      0
>DP00183      95      0
>DP00183      96      0
>DP00183      97      0
>DP00183      98      0
>DP00183      99      0
>DP00183      100      0
>DP00183      101      0
>DP00183      102      0
>DP00183      103      0
>DP00183      104      0
>DP00183      105      0
>DP00183      106      0
>DP00183      107      0
>DP00183      108      0
>DP00183      109      0
>DP00183      110      0
>DP00183      111      0
>DP00183      112      0
>DP00183      113      0
>DP00183      114      0
>DP00183      115      0
>DP00183      116      0
>DP00183      117      0
>DP00183      118      0
>DP00183      119      0
>DP00183      120      0
>DP00183      121      0
>DP00183      122      0
>DP00183      123      0
>DP00183      124      0
>DP00183      125      0
>DP00183      126      0
>DP00183      127      0
>DP00183      128      0
>DP00183      129      1
>DP00183      130      1
>DP00183      131      1
>DP00183      132      1
>DP00183      133      1
>DP00183      134      1
>DP00183      135      0
>DP00183      136      0
>DP00183      137      0
>DP00183      138      0
>DP00183      139      0
>DP00183      140      0
>DP00183      141      0
>DP00183      142      0
>DP00183      143      0
>DP00183      144      0
>DP00183      145      0
>DP00183      146      0
>DP00183      147      0
>DP00183      148      0
>DP00183      149      0
>DP00183      150      0
>DP00183      151      0
>DP00183      152      0
>DP00183      153      0
>DP00183      154      0
>DP00183      155      0
>DP00183      156      0
>DP00183      157      0
>DP00183      158      0
>DP00183      159      0
>DP00183      160      0
>DP00183      161      0
>DP00183      162      0
>DP00183      163      0
>DP00183      164      0
>DP00183      165      0
>DP00183      166      0
>DP00183      167      0
>DP00183      168      0
>DP00183      169      0
>DP00183      170      0
>DP00183      171      0
>DP00183      172      0
>DP00183      173      0
>DP00183      174      0
>DP00183      175      0
>DP00183      176      0
>DP00183      177      0
>DP00183      178      0
>DP00183      179      0
>DP00183      180      0
>DP00183      181      0
>DP00183      182      0
>DP00183      183      0
>DP00183      184      0
>DP00183      185      0
>DP00183      186      0
>DP00183      187      0
>DP00183      188      0
>DP00183      189      0
>DP00183      190      0
>DP00183      191      0
>DP00183      192      0
>DP00183      193      0
>DP00183      194      0
>DP00183      195      0
>DP00183      196      0
>DP00183      197      0
>DP00183      198      0
>DP00183      199      0
>DP00183      200      0
>DP00183      201      0
>DP00183      202      0
>DP00183      203      0
>DP00183      204      0
>DP00183      205      0
>DP00183      206      0
>DP00183      207      0
>DP00183      208      0
>DP00183      209      0
>DP00183      210      0
>DP00183      211      0
>DP00183      212      0
>DP00183      213      0
>DP00183      214      0
>DP00183      215      0
>DP00183      216      0
>DP00183      217      0
>DP00183      218      0
>DP00183      219      0
>DP00183      220      0
>DP00183      221      0
>DP00183      222      0
>DP00183      223      0
>DP00183      224      0
>DP00183      225      0
>DP00183      226      0
>DP00183      227      0
>DP00183      228      0
>DP00183      229      0
>DP00183      230      0
>DP00183      231      0
>DP00183      232      0
>DP00183      233      0
>DP00183      234      0
>DP00183      235      0
>DP00183      236      0
>DP00183      237      0
>DP00183      238      0
>DP00183      239      0
>DP00183      240      0
>DP00183      241      0
>DP00183      242      0
>DP00183      243      0
>DP00183      244      0
>DP00183      245      0
>DP00183      246      0
>DP00183      247      0
>DP00183      248      0
>DP00183      249      0
>DP00183      250      0
>DP00183      251      0
>DP00183      252      0
>DP00183      253      0
>DP00183      254      0
>DP00183      255      0
>DP00183      256      0
>DP00183      257      0
>DP00183      258      0
>DP00183      259      0
>DP00183      260      0
>DP00183      261      0
>DP00183      262      0
>DP00183      263      0
>DP00183      264      0
>DP00183      265      0
>DP00183      266      0
>DP00183      267      0
>DP00183      268      0
>DP00183      269      0
>DP00183      270      0
>DP00183      271      0
>DP00183      272      0
>DP00183      273      0
>DP00183      274      0
>DP00183      275      0
>DP00183      276      0
>DP00183      277      0
>DP00183      278      0
>DP00183      279      0
>DP00183      280      0
>DP00183      281      0
>DP00183      282      0
>DP00183      283      0
>DP00183      284      0
>DP00183      285      0
>DP00183      286      0
>DP00183      287      0
>DP00183      288      0
>DP00183      289      0
>DP00183      290      0
>DP00183      291      0
>DP00183      292      0
>DP00183      293      0
>DP00183      294      0
>DP00183      295      0
>DP00183      296      0
>DP00183      297      0
>DP00183      298      0
>DP00183      299      0
>DP00183      300      0
>DP00183      301      0
>DP00183      302      0
>DP00183      303      0
>DP00183      304      0
>DP00183      305      0
>DP00183      306      0
>DP00183      307      0
>DP00183      308      0
>DP00183      309      0
>DP00183      310      0
>DP00183      311      0
>DP00183      312      0
>DP00183      313      0
>DP00183      314      0
>DP00183      315      0
>DP00183      316      0
>DP00183      317      0
>DP00183      318      0
>DP00183      319      0
>DP00183      320      0
>DP00183      321      0
>DP00183      322      0
>DP00183      323      0
>DP00183      324      0
>DP00183      325      0
>DP00183      326      0
>DP00183      327      0
>DP00183      328      0
>DP00183      329      0
>DP00183      330      0
>DP00183      331      0
>DP00183      332      0
>DP00183      333      0
>DP00183      334      0
>DP00183      335      0
>DP00183      336      0
>DP00183      337      0
>DP00183      338      0
>DP00183      339      0
>DP00183      340      0
>DP00183      341      0
>DP00183      342      0
>DP00183      343      0
>DP00183      344      0
>DP00183      345      0
>DP00183      346      0
>DP00183      347      0
>DP00183      348      0
>DP00183      349      0
>DP00183      350      0
>DP00183      351      0
>DP00183      352      0
>DP00183      353      0
>DP00183      354      0
>DP00183      355      0
>DP00183      356      0
>DP00183      357      0
>DP00183      358      0
>DP00183      359      0
>DP00183      360      0
>DP00183      361      0
>DP00183      362      0
>DP00183      363      0
>DP00183      364      0
>DP00183      365      0
>DP00183      366      0
>DP00183      367      0
>DP00183      368      0
>DP00183      369      0
>DP00183      370      0
>DP00183      371      0
>DP00183      372      0
>DP00183      373      0
>DP00183      374      0
>DP00183      375      0
>DP00183      376      0
>DP00183      377      0
>DP00183      378      0
>DP00183      379      0
>DP00183      380      0
>DP00183      381      0
>DP00183      382      0
>DP00183      383      0
>DP00183      384      0
>DP00183      385      0
>DP00183      386      0
>DP00183      387      0
>DP00183      388      0
>DP00183      389      0
>DP00183      390      0
>DP00183      391      0
>DP00183      392      0
>DP00183      393      0
>DP00183      394      0
>DP00183      395      0
>DP00183      396      0
>DP00183      397      0
>DP00183      398      0
>DP00183      399      0
>DP00183      400      0
>DP00183      401      0
>DP00183      402      0
>DP00183      403      0
>DP00183      404      0
>DP00183      405      0
>DP00183      406      0
>DP00183      407      0
>DP00183      408      0
>DP00183      409      0
>DP00183      410      0
>DP00183      411      0
>DP00183      412      0
>DP00183      413      0
>DP00183      414      0
>DP00183      415      0
>DP00183      416      0
>DP00183      417      0
>DP00183      418      0
>DP00183      419      0
>DP00183      420      0
>DP00183      421      0
>DP00183      422      0
>DP00183      423      0
>DP00183      424      0
>DP00183      425      0
>DP00183      426      0
>DP00183      427      0
>DP00183      428      0
>DP00183      429      0
>DP00183      430      0
>DP00183      431      0
>DP00183      432      0
>DP00183      433      0
>DP00183      434      0
>DP00183      435      0
>DP00183      436      0
>DP00183      437      0
>DP00183      438      0
>DP00183      439      0
>DP00183      440      0
>DP00183      441      0
>DP00183      442      0
>DP00183      443      0
>DP00183      444      0
>DP00183      445      0
>DP00183      446      0
>DP00183      447      0
>DP00183      448      0
>DP00183      449      0
>DP00183      450      0
>DP00183      451      0
>DP00183      452      0
>DP00183      453      0
>DP00183      454      0
>DP00183      455      0
>DP00183      456      0
>DP00183      457      0
>DP00183      458      0
>DP00183      459      0
>DP00183      460      0
>DP00183      461      0
>DP00183      462      0
>DP00183      463      0
>DP00183      464      0
>DP00183      465      0
>DP00183      466      0
>DP00183      467      0
>DP00183      468      0
>DP00183      469      0
>DP00183      470      0
>DP00183      471      0
>DP00183      472      0
>DP00183      473      0
>DP00183      474      0
>DP00183      475      0
>DP00183      476      0
>DP00183      477      0
>DP00183      478      0
>DP00183      479      0
>DP00183      480      0
>DP00183      481      0
>DP00183      482      0
>DP00183      483      0
>DP00183      484      0
>DP00183      485      0
>DP00183      486      0
>DP00183      487      0
>DP00183      488      0
>DP00183      489      0
>DP00183      490      0
>DP00183      491      0
>DP00183      492      0
>DP00183      493      0
>DP00183      494      0
>DP00183      495      0
>DP00183      496      0
>DP00183      497      0
>DP00183      498      0
>DP00183      499      0
>DP00183      500      0
>DP00183      501      0
>DP00183      502      0
>DP00183      503      0
>DP00183      504      0
>DP00183      505      0
>DP00183      506      0
>DP00183      507      0
>DP00183      508      0
>DP00183      509      0
>DP00183      510      0
>DP00183      511      0
>DP00183      512      0
>DP00183      513      0
>DP00183      514      0
>DP00183      515      0
>DP00183      516      0
>DP00183      517      0
>DP00183      518      0
>DP00183      519      0
>DP00183      520      0
>DP00183      521      0
>DP00183      522      0
>DP00183      523      0
>DP00183      524      0
>DP00183      525      0
>DP00183      526      0
>DP00183      527      0
>DP00183      528      0
>DP00183      529      0
>DP00183      530      0
>DP00183      531      0
>DP00183      532      0
>DP00183      533      0
>DP00183      534      0
>DP00183      535      0
>DP00183      536      0
>DP00183      537      0
>DP00183      538      0
>DP00183      539      0
>DP00183      540      0
>DP00183      541      0
>DP00183      542      0
>DP00183      543      0
>DP00183      544      0
>DP00183      545      0
>DP00183      546      0
>DP00183      547      0
>DP00183      548      0
>DP00183      549      0
>DP00183      550      0
>DP00183      551      0
>DP00183      552      0
>DP00183      553      0
>DP00183      554      0
>DP00183      555      0
>DP00183      556      0
>DP00183      557      0
>DP00183      558      0
>DP00183      559      0
>DP00183      560      0
>DP00183      561      0
>DP00183      562      0
>DP00183      563      0
>DP00183      564      0
>DP00183      565      0
>DP00183      566      0
>DP00183      567      0
>DP00183      568      0
>DP00183      569      0
>DP00183      570      0
>DP00183      571      0
>DP00183      572      0
>DP00183      573      0
>DP00183      574      0
>DP00183      575      0
>DP00183      576      0
>DP00183      577      0
>DP00183      578      0
>DP00183      579      0
>DP00183      580      0
>DP00183      581      0
>DP00183      582      0
>DP00183      583      0
>DP00183      584      0
>DP00183      585      0
>DP00183      586      0
>DP00183      587      0
>DP00183      588      0
>DP00183      589      0
>DP00183      590      0
>DP00183      591      0
>DP00183      592      0
>DP00183      593      0
>DP00183      594      0
>DP00183      595      0
>DP00183      596      0
>DP00183      597      0
>DP00183      598      0
>DP00183      599      0
>DP00183      600      0
>DP00183      601      0
>DP00183      602      0
>DP00183      603      0
>DP00183      604      0
>DP00183      605      0
>DP00183      606      0
>DP00183      607      0
>DP00183      608      0
>DP00183      609      0
>DP00183      610      0
>DP00183      611      0
>DP00183      612      0
>DP00183      613      0
>DP00183      614      0
>DP00183      615      0
>DP00183      616      0
>DP00183      617      0
>DP00183      618      0
>DP00183      619      0
>DP00183      620      0
>DP00183      621      0
>DP00183      622      0
>DP00183      623      0
>DP00183      624      0
>DP00183      625      0
>DP00183      626      0
>DP00183      627      0
>DP00183      628      0
>DP00183      629      0
>DP00183      630      0
>DP00183      631      0
>DP00183      632      0
>DP00183      633      0
>DP00183      634      0
>DP00183      635      0
>DP00183      636      0
>DP00183      637      0
>DP00183      638      0
>DP00183      639      0
>DP00183      640      0
>DP00183      641      0
>DP00183      642      0
>DP00183      643      0
>DP00183      644      0
>DP00183      645      0
>DP00183      646      0
>DP00183      647      0
>DP00183      648      0
>DP00183      649      0
>DP00183      650      0
>DP00183      651      0
>DP00183      652      0
>DP00183      653      0
>DP00183      654      0
>DP00183      655      0
>DP00183      656      0
>DP00183      657      0
>DP00183      658      0
>DP00183      659      0
>DP00183      660      0
>DP00183      661      0
>DP00183      662      0
>DP00183      663      0
>DP00183      664      0
>DP00183      665      0
>DP00183      666      0
>DP00183      667      0
>DP00183      668      0
>DP00183      669      0
>DP00183      670      0
>DP00183      671      0
>DP00183      672      0
>DP00183      673      0
>DP00183      674      0
>DP00183      675      0
>DP00183      676      0
>DP00183      677      0
>DP00183      678      0
>DP00183      679      0
>DP00183      680      0
>DP00183      681      0
>DP00183      682      0
>DP00183      683      0
>DP00183      684      0
>DP00183      685      0
>DP00183      686      0
>DP00183      687      0
>DP00183      688      0
>DP00183      689      0
>DP00183      690      0
>DP00183      691      0
>DP00183      692      0
>DP00183      693      0
>DP00183      694      0
>DP00183      695      0
>DP00183      696      0
>DP00183      697      0
>DP00183      698      0
>DP00183      699      0
>DP00183      700      0
>DP00183      701      0
>DP00183      702      0
>DP00183      703      0
>DP00183      704      0
>DP00183      705      0
>DP00183      706      0
>DP00183      707      0
>DP00183      708      0
>DP00183      709      0
>DP00183      710      0
>DP00183      711      0
>DP00183      712      0
>DP00183      713      0
>DP00183      714      0
>DP00183      715      0
>DP00183      716      0
>DP00183      717      0
>DP00183      718      0
>DP00183      719      0
>DP00183      720      0
>DP00183      721      0
>DP00183      722      0
>DP00183      723      0
>DP00183      724      0
>DP00183      725      0
>DP00183      726      0
>DP00183      727      0
>DP00183      728      0
>DP00183      729      0
>DP00183      730      0
>DP00183      731      0
>DP00183      732      0
>DP00183      733      0
>DP00183      734      0
>DP00183      735      0
>DP00183      736      0
>DP00183      737      0
>DP00183      738      0
>DP00183      739      0
>DP00183      740      0
>DP00183      741      0
>DP00183      742      0
>DP00183      743      0
>DP00183      744      0
>DP00183      745      0
>DP00183      746      0
>DP00183      747      0
>DP00183      748      0
>DP00183      749      0
>DP00183      750      0
>DP00183      751      0
>DP00183      752      0
>DP00183      753      0
>DP00183      754      0
>DP00183      755      0
>DP00183      756      0
>DP00183      757      0
>DP00183      758      0
>DP00183      759      0
>DP00183      760      0
>DP00183      761      0
>DP00183      762      0
>DP00183      763      0
>DP00183      764      0
>DP00183      765      0
>DP00183      766      0
>DP00183      767      0
>DP00183      768      0
>DP00183      769      0
>DP00183      770      0
>DP00183      771      0
>DP00183      772      0
>DP00183      773      0
>DP00183      774      0
>DP00183      775      0
>DP00183      776      0
>DP00183      777      0
>DP00183      778      0
>DP00183      779      0
>DP00183      780      0
>DP00183      781      0
>DP00183      782      0
>DP00183      783      0
>DP00183      784      0
>DP00183      785      0
>DP00183      786      0
>DP00183      787      0
>DP00183      788      0
>DP00183      789      0
>DP00183      790      0
>DP00183      791      0
>DP00183      792      0
>DP00183      793      0
>DP00183      794      0
>DP00183      795      0
>DP00183      796      0
>DP00183      797      0
>DP00183      798      0
>DP00183      799      0
>DP00183      800      0
>DP00183      801      0
>DP00183      802      0
>DP00183      803      0
>DP00183      804      0
>DP00183      805      0
>DP00183      806      0
>DP00183      807      0
>DP00183      808      0
>DP00183      809      0
>DP00183      810      0
>DP00183      811      0
>DP00183      812      0
>DP00183      813      0
>DP00183      814      0
>DP00183      815      0
>DP00534      1      1
>DP00534      2      1
>DP00534      3      1
>DP00534      4      1
>DP00534      5      1
>DP00534      6      1
>DP00534      7      1
>DP00534      8      1
>DP00534      9      1
>DP00534      10      1
>DP00534      11      1
>DP00534      12      1
>DP00534      13      1
>DP00534      14      1
>DP00534      15      1
>DP00534      16      1
>DP00534      17      1
>DP00534      18      1
>DP00534      19      1
>DP00534      20      1
>DP00534      21      1
>DP00534      22      1
>DP00534      23      1
>DP00534      24      1
>DP00534      25      1
>DP00534      26      1
>DP00534      27      1
>DP00534      28      1
>DP00534      29      1
>DP00534      30      1
>DP00534      31      1
>DP00534      32      1
>DP00534      33      1
>DP00534      34      1
>DP00534      35      1
>DP00534      36      1
>DP00534      37      1
>DP00534      38      1
>DP00534      39      1
>DP00534      40      1
>DP00534      41      1
>DP00534      42      1
>DP00534      43      1
>DP00534      44      1
>DP00534      45      1
>DP00534      46      1
>DP00534      47      1
>DP00534      48      1
>DP00534      49      1
>DP00534      50      1
>DP00534      51      1
>DP00534      52      1
>DP00534      53      1
>DP00534      54      1
>DP00534      55      1
>DP00534      56      1
>DP00534      57      1
>DP00534      58      1
>DP00534      59      1
>DP00534      60      1
>DP00534      61      1
>DP00534      62      1
>DP00534      63      1
>DP00534      64      1
>DP00534      65      1
>DP00534      66      1
>DP00534      67      1
>DP00534      68      1
>DP00534      69      1
>DP00534      70      1
>DP00534      71      1
>DP00534      72      1
>DP00534      73      1
>DP00534      74      1
>DP00534      75      1
>DP00534      76      1
>DP00534      77      1
>DP00534      78      1
>DP00534      79      1
>DP00534      80      1
>DP00534      81      1
>DP00534      82      1
>DP00534      83      1
>DP00534      84      1
>DP00534      85      1
>DP00534      86      1
>DP00534      87      1
>DP00534      88      1
>DP00534      89      1
>DP00534      90      1
>DP00534      91      1
>DP00534      92      1
>DP00534      93      1
>DP00534      94      1
>DP00534      95      1
>DP00534      96      1
>DP00534      97      1
>DP00534      98      1
>DP00534      99      1
>DP00534      100      1
>DP00534      101      1
>DP00534      102      1
>DP00534      103      1
>DP00534      104      1
>DP00534      105      1
>DP00534      106      1
>DP00534      107      1
>DP00534      108      1
>DP00534      109      1
>DP00534      110      1
>DP00534      111      1
>DP00534      112      1
>DP00534      113      1
>DP00534      114      1
>DP00534      115      1
>DP00534      116      1
>DP00534      117      1
>DP00534      118      1
>DP00534      119      1
>DP00534      120      1
>DP00534      121      1
>DP00534      122      1
>DP00534      123      1
>DP00534      124      1
>DP00534      125      1
>DP00534      126      1
>DP00534      127      1
>DP00534      128      1
>DP00534      129      1
>DP00534      130      1
>DP00534      131      1
>1wgm_A      1      0
>1wgm_A      2      0
>1wgm_A      3      0
>1wgm_A      4      0
>1wgm_A      5      0
>1wgm_A      6      0
>1wgm_A      7      0
>1wgm_A      8      0
>1wgm_A      9      0
>1wgm_A      10      0
>1wgm_A      11      0
>1wgm_A      12      0
>1wgm_A      13      0
>1wgm_A      14      0
>1wgm_A      15      0
>1wgm_A      16      0
>1wgm_A      17      0
>1wgm_A      18      0
>1wgm_A      19      0
>1wgm_A      20      0
>1wgm_A      21      0
>1wgm_A      22      0
>1wgm_A      23      0
>1wgm_A      24      0
>1wgm_A      25      0
>1wgm_A      26      0
>1wgm_A      27      0
>1wgm_A      28      0
>1wgm_A      29      0
>1wgm_A      30      0
>1wgm_A      31      0
>1wgm_A      32      0
>1wgm_A      33      0
>1wgm_A      34      0
>1wgm_A      35      0
>1wgm_A      36      0
>1wgm_A      37      0
>1wgm_A      38      0
>1wgm_A      39      0
>1wgm_A      40      0
>1wgm_A      41      0
>1wgm_A      42      0
>1wgm_A      43      0
>1wgm_A      44      0
>1wgm_A      45      0
>1wgm_A      46      0
>1wgm_A      47      0
>1wgm_A      48      0
>1wgm_A      49      0
>1wgm_A      50      0
>1wgm_A      51      0
>1wgm_A      52      0
>1wgm_A      53      0
>1wgm_A      54      0
>1wgm_A      55      0
>1wgm_A      56      0
>1wgm_A      57      0
>1wgm_A      58      0
>1wgm_A      59      0
>1wgm_A      60      0
>1wgm_A      61      0
>1wgm_A      62      0
>1wgm_A      63      0
>1wgm_A      64      0
>1wgm_A      65      0
>1wgm_A      66      0
>1wgm_A      67      0
>1wgm_A      68      0
>1wgm_A      69      0
>1wgm_A      70      0
>1wgm_A      71      0
>1wgm_A      72      0
>1wgm_A      73      0
>1wgm_A      74      0
>1wgm_A      75      0
>1wgm_A      76      0
>1wgm_A      77      0
>1wgm_A      78      0
>1wgm_A      79      0
>1wgm_A      80      0
>1wgm_A      81      0
>1wgm_A      82      0
>1wgm_A      83      0
>1wgm_A      84      0
>1wgm_A      85      0
>1wgm_A      86      0
>1wgm_A      87      0
>1wgm_A      88      0
>1wgm_A      89      0
>1wgm_A      90      0
>1wgm_A      91      0
>1wgm_A      92      0
>1wgm_A      93      0
>1wgm_A      94      0
>1wgm_A      95      0
>1wgm_A      96      0
>1wgm_A      97      0
>1wgm_A      98      0
>2vb1_A      1      0
>2vb1_A      2      0
>2vb1_A      3      0
>2vb1_A      4      0
>2vb1_A      5      0
>2vb1_A      6      0
>2vb1_A      7      0
>2vb1_A      8      0
>2vb1_A      9      0
>2vb1_A      10      0
>2vb1_A      11      0
>2vb1_A      12      0
>2vb1_A      13      0
>2vb1_A      14      0
>2vb1_A      15      0
>2vb1_A      16      0
>2vb1_A      17      0
>2vb1_A      18      0
>2vb1_A      19      0
>2vb1_A      20      0
>2vb1_A      21      0
>2vb1_A      22      0
>2vb1_A      23      0
>2vb1_A      24      0
>2vb1_A      25      0
>2vb1_A      26      0
>2vb1_A      27      0
>2vb1_A      28      0
>2vb1_A      29      0
>2vb1_A      30      0
>2vb1_A      31      0
>2vb1_A      32      0
>2vb1_A      33      0
>2vb1_A      34      0
>2vb1_A      35      0
>2vb1_A      36      0
>2vb1_A      37      0
>2vb1_A      38      0
>2vb1_A      39      0
>2vb1_A      40      0
>2vb1_A      41      0
>2vb1_A      42      0
>2vb1_A      43      0
>2vb1_A      44      0
>2vb1_A      45      0
>2vb1_A      46      0
>2vb1_A      47      0
>2vb1_A      48      0
>2vb1_A      49      0
>2vb1_A      50      0
>2vb1_A      51      0
>2vb1_A      52      0
>2vb1_A      53      0
>2vb1_A      54      0
>2vb1_A      55      0
>2vb1_A      56      0
>2vb1_A      57      0
>2vb1_A      58      0
>2vb1_A      59      0
>2vb1_A      60      0
>2vb1_A      61      0
>2vb1_A      62      0
>2vb1_A      63      0
>2vb1_A      64      0
>2vb1_A      65      0
>2vb1_A      66      0
>2vb1_A      67      0
>2vb1_A      68      0
>2vb1_A      69      0
>2vb1_A      70      0
>2vb1_A      71      0
>2vb1_A      72      0
>2vb1_A      73      0
>2vb1_A      74      0
>2vb1_A      75      0
>2vb1_A      76      0
>2vb1_A      77      0
>2vb1_A      78      0
>2vb1_A      79      0
>2vb1_A      80      0
>2vb1_A      81      0
>2vb1_A      82      0
>2vb1_A      83      0
>2vb1_A      84      0
>2vb1_A      85      0
>2vb1_A      86      0
>2vb1_A      87      0
>2vb1_A      88      0
>2vb1_A      89      0
>2vb1_A      90      0
>2vb1_A      91      0
>2vb1_A      92      0
>2vb1_A      93      0
>2vb1_A      94      0
>2vb1_A      95      0
>2vb1_A      96      0
>2vb1_A      97      0
>2vb1_A      98      0
>2vb1_A      99      0
>2vb1_A      100      0
>2vb1_A      101      0
>2vb1_A      102      0
>2vb1_A      103      0
>2vb1_A      104      0
>2vb1_A      105      0
>2vb1_A      106      0
>2vb1_A      107      0
>2vb1_A      108      0
>2vb1_A      109      0
>2vb1_A      110      0
>2vb1_A      111      0
>2vb1_A      112      0
>2vb1_A      113      0
>2vb1_A      114      0
>2vb1_A      115      0
>2vb1_A      116      0
>2vb1_A      117      0
>2vb1_A      118      0
>2vb1_A      119      0
>2vb1_A      120      0
>2vb1_A      121      0
>2vb1_A      122      0
>2vb1_A      123      0
>2vb1_A      124      0
>2vb1_A      125      0
>2vb1_A      126      0
>2vb1_A      127      0
>2vb1_A      128      0
>2vb1_A      129      0
>DP00365      1      0
>DP00365      2      0
>DP00365      3      0
>DP00365      4      0
>DP00365      5      0
>DP00365      6      0
>DP00365      7      0
>DP00365      8      0
>DP00365      9      0
>DP00365      10      0
>DP00365      11      0
>DP00365      12      0
>DP00365      13      0
>DP00365      14      0
>DP00365      15      0
>DP00365      16      0
>DP00365      17      0
>DP00365      18      0
>DP00365      19      1
>DP00365      20      1
>DP00365      21      1
>DP00365      22      1
>DP00365      23      1
>DP00365      24      1
>DP00365      25      1
>DP00365      26      1
>DP00365      27      1
>DP00365      28      1
>DP00365      29      1
>DP00365      30      1
>DP00365      31      1
>DP00365      32      1
>DP00365      33      1
>DP00365      34      1
>DP00365      35      1
>DP00365      36      1
>DP00365      37      1
>DP00365      38      1
>DP00365      39      1
>DP00365      40      1
>DP00365      41      1
>DP00365      42      1
>DP00365      43      1
>DP00365      44      1
>DP00365      45      1
>DP00365      46      1
>DP00365      47      1
>DP00365      48      1
>DP00365      49      1
>DP00365      50      1
>DP00365      51      1
>DP00365      52      1
>DP00365      53      1
>DP00365      54      1
>DP00365      55      1
>DP00365      56      1
>DP00365      57      1
>DP00365      58      1
>DP00365      59      1
>DP00365      60      1
>DP00365      61      1
>DP00365      62      1
>DP00365      63      1
>DP00365      64      1
>DP00365      65      1
>DP00365      66      1
>DP00365      67      1
>DP00365      68      1
>DP00365      69      1
>DP00365      70      1
>DP00365      71      1
>DP00365      72      1
>DP00365      73      1
>DP00365      74      1
>DP00365      75      1
>DP00365      76      1
>DP00365      77      1
>DP00365      78      1
>DP00365      79      1
>DP00365      80      1
>DP00365      81      1
>DP00365      82      1
>DP00365      83      1
>DP00365      84      1
>DP00365      85      1
>DP00365      86      1
>DP00365      87      1
>DP00365      88      1
>DP00365      89      1
>DP00365      90      1
>DP00365      91      1
>DP00365      92      1
>DP00365      93      1
>DP00365      94      1
>DP00365      95      1
>DP00365      96      1
>DP00365      97      1
>DP00365      98      1
>DP00365      99      1
>DP00365      100      1
>DP00365      101      1
>DP00365      102      1
>DP00365      103      1
>DP00365      104      1
>DP00365      105      1
>DP00365      106      1
>DP00365      107      1
>DP00365      108      1
>DP00365      109      1
>DP00365      110      1
>DP00365      111      1
>DP00365      112      1
>DP00365      113      1
>DP00365      114      1
>DP00365      115      1
>DP00365      116      1
>DP00365      117      1
>DP00365      118      1
>DP00365      119      1
>DP00365      120      1
>DP00365      121      1
>DP00365      122      1
>DP00365      123      1
>DP00365      124      1
>DP00365      125      1
>DP00365      126      1
>DP00365      127      1
>DP00365      128      1
>DP00365      129      1
>DP00365      130      1
>DP00365      131      1
>DP00365      132      1
>DP00365      133      1
>DP00365      134      1
>DP00365      135      1
>DP00365      136      1
>DP00365      137      1
>DP00365      138      1
>DP00365      139      1
>DP00365      140      1
>DP00365      141      1
>DP00365      142      1
>DP00365      143      1
>DP00365      144      1
>DP00365      145      1
>DP00365      146      1
>DP00365      147      1
>DP00365      148      0
>DP00365      149      0
>DP00365      150      0
>DP00365      151      0
>DP00365      152      0
>DP00365      153      0
>DP00365      154      0
>DP00365      155      0
>DP00365      156      0
>DP00365      157      0
>DP00365      158      0
>DP00365      159      0
>DP00365      160      0
>DP00365      161      0
>DP00365      162      0
>DP00365      163      0
>DP00365      164      0
>DP00365      165      0
>DP00365      166      0
>DP00365      167      0
>DP00365      168      0
>DP00365      169      0
>DP00365      170      0
>DP00365      171      0
>DP00365      172      0
>DP00365      173      0
>DP00365      174      0
>DP00365      175      0
>DP00365      176      0
>DP00365      177      0
>DP00365      178      0
>DP00365      179      0
>DP00365      180      0
>DP00365      181      0
>DP00365      182      0
>DP00365      183      0
>DP00365      184      0
>DP00365      185      0
>DP00365      186      0
>DP00365      187      0
>DP00365      188      0
>DP00365      189      0
>DP00365      190      0
>DP00365      191      0
>DP00365      192      0
>DP00365      193      0
>DP00365      194      0
>DP00365      195      0
>DP00365      196      0
>DP00365      197      0
>DP00365      198      0
>DP00365      199      0
>DP00365      200      0
>DP00365      201      0
>DP00365      202      0
>DP00365      203      0
>DP00365      204      0
>DP00365      205      0
>DP00365      206      0
>DP00365      207      0
>DP00365      208      0
>DP00365      209      0
>DP00365      210      0
>DP00365      211      0
>DP00365      212      0
>DP00365      213      0
>DP00365      214      0
>DP00365      215      0
>DP00365      216      0
>DP00365      217      0
>DP00365      218      0
>DP00365      219      0
>DP00365      220      0
>DP00365      221      0
>DP00365      222      0
>DP00365      223      0
>DP00365      224      0
>DP00365      225      0
>DP00365      226      0
>DP00365      227      0
>DP00365      228      0
>DP00365      229      0
>DP00365      230      0
>DP00365      231      0
>DP00365      232      0
>DP00365      233      0
>DP00365      234      0
>DP00365      235      0
>DP00365      236      0
>DP00365      237      0
>DP00365      238      0
>DP00365      239      0
>DP00365      240      0
>DP00365      241      0
>DP00365      242      0
>DP00365      243      0
>DP00365      244      0
>DP00365      245      0
>DP00365      246      0
>DP00365      247      0
>DP00365      248      0
>DP00365      249      0
>DP00365      250      0
>DP00365      251      0
>DP00365      252      0
>DP00365      253      0
>DP00365      254      0
>DP00365      255      0
>DP00365      256      0
>DP00365      257      0
>DP00365      258      0
>DP00365      259      0
>DP00365      260      0
>DP00365      261      0
>DP00365      262      0
>DP00365      263      0
>DP00365      264      0
>DP00365      265      0
>DP00365      266      0
>DP00365      267      0
>DP00365      268      0
>DP00365      269      0
>DP00365      270      0
>DP00365      271      0
>DP00365      272      0
>DP00365      273      0
>DP00365      274      0
>DP00365      275      0
>DP00365      276      0
>DP00365      277      0
>DP00365      278      0
>DP00365      279      0
>DP00365      280      0
>DP00365      281      0
>DP00365      282      0
>DP00365      283      0
>DP00365      284      0
>DP00365      285      0
>DP00365      286      0
>DP00365      287      0
>DP00365      288      0
>DP00365      289      0
>DP00365      290      0
>DP00365      291      0
>DP00365      292      0
>DP00365      293      0
>DP00365      294      0
>DP00365      295      0
>DP00365      296      0
>DP00365      297      0
>DP00365      298      0
>DP00365      299      0
>DP00365      300      0
>DP00365      301      0
>DP00365      302      0
>DP00365      303      0
>DP00365      304      0
>DP00365      305      0
>DP00365      306      0
>DP00365      307      0
>DP00365      308      0
>DP00365      309      0
>DP00365      310      0
>DP00365      311      0
>DP00365      312      0
>DP00365      313      0
>DP00365      314      0
>DP00365      315      0
>DP00365      316      0
>DP00365      317      0
>DP00365      318      0
>DP00365      319      0
>DP00365      320      0
>DP00365      321      0
>DP00365      322      0
>DP00365      323      0
>DP00365      324      0
>DP00365      325      0
>DP00365      326      0
>DP00365      327      0
>DP00365      328      0
>DP00365      329      0
>DP00365      330      0
>DP00365      331      0
>DP00365      332      0
>DP00365      333      0
>DP00365      334      0
>DP00365      335      0
>DP00365      336      0
>DP00365      337      0
>DP00365      338      0
>DP00365      339      0
>DP00365      340      0
>DP00365      341      0
>DP00365      342      0
>DP00365      343      0
>DP00365      344      0
>DP00365      345      0
>DP00365      346      0
>DP00365      347      0
>DP00365      348      0
>DP00365      349      0
>DP00365      350      0
>DP00365      351      0
>DP00365      352      0
>DP00365      353      0
>DP00365      354      0
>DP00365      355      0
>DP00365      356      0
>DP00365      357      0
>DP00365      358      0
>DP00365      359      0
>DP00365      360      0
>DP00365      361      0
>DP00365      362      0
>DP00365      363      0
>DP00365      364      0
>DP00365      365      0
>DP00365      366      0
>DP00365      367      0
>DP00365      368      0
>DP00365      369      0
>DP00365      370      0
>DP00365      371      0
>DP00365      372      0
>DP00365      373      0
>DP00365      374      0
>DP00365      375      0
>DP00365      376      0
>DP00365      377      0
>DP00365      378      0
>DP00365      379      0
>DP00365      380      0
>DP00365      381      0
>DP00365      382      0
>DP00365      383      0
>DP00365      384      0
>DP00365      385      0
>DP00365      386      0
>DP00365      387      0
>DP00365      388      0
>DP00365      389      0
>DP00365      390      0
>DP00365      391      0
>DP00365      392      0
>DP00365      393      0
>DP00365      394      0
>DP00365      395      0
>DP00365      396      0
>DP00365      397      0
>DP00365      398      0
>DP00365      399      0
>DP00365      400      0
>DP00365      401      0
>DP00365      402      0
>DP00365      403      0
>DP00365      404      0
>DP00365      405      0
>DP00365      406      0
>DP00365      407      0
>DP00365      408      0
>DP00365      409      0
>DP00365      410      0
>DP00365      411      0
>DP00365      412      0
>DP00365      413      0
>DP00365      414      0
>DP00365      415      0
>DP00365      416      0
>DP00365      417      0
>DP00365      418      0
>DP00365      419      0
>DP00365      420      0
>DP00365      421      0
>DP00365      422      0
>DP00365      423      0
>DP00365      424      0
>DP00365      425      0
>DP00365      426      0
>DP00365      427      0
>DP00365      428      0
>DP00365      429      0
>DP00365      430      0
>DP00365      431      0
>DP00365      432      0
>DP00365      433      0
>DP00365      434      0
>DP00365      435      0
>DP00365      436      0
>DP00365      437      0
>DP00365      438      0
>DP00365      439      0
>DP00365      440      0
>DP00365      441      0
>DP00365      442      0
>DP00365      443      0
>DP00365      444      0
>DP00365      445      0
>DP00365      446      0
>DP00365      447      0
>DP00365      448      0
>DP00365      449      0
>DP00365      450      0
>DP00365      451      0
>DP00365      452      0
>DP00365      453      0
>DP00365      454      0
>DP00365      455      0
>DP00365      456      0
>DP00365      457      0
>DP00365      458      0
>DP00365      459      0
>DP00365      460      0
>DP00365      461      0
>DP00365      462      0
>DP00365      463      0
>DP00365      464      0
>DP00365      465      0
>DP00365      466      0
>DP00365      467      0
>DP00365      468      0
>DP00365      469      0
>DP00365      470      0
>DP00365      471      0
>DP00365      472      0
>DP00365      473      0
>DP00365      474      0
>DP00365      475      0
>DP00365      476      0
>DP00365      477      0
>DP00365      478      0
>DP00365      479      0
>DP00365      480      0
>DP00365      481      0
>DP00365      482      0
>DP00365      483      0
>DP00365      484      0
>DP00365      485      0
>DP00365      486      0
>DP00365      487      0
>DP00365      488      0
>DP00365      489      0
>DP00365      490      0
>DP00365      491      0
>DP00365      492      0
>DP00365      493      0
>DP00365      494      0
>DP00365      495      0
>DP00365      496      0
>DP00365      497      0
>DP00365      498      0
>DP00365      499      0
>1j0t_A      1      0
>1j0t_A      2      0
>1j0t_A      3      0
>1j0t_A      4      0
>1j0t_A      5      0
>1j0t_A      6      0
>1j0t_A      7      0
>1j0t_A      8      0
>1j0t_A      9      0
>1j0t_A      10      0
>1j0t_A      11      0
>1j0t_A      12      0
>1j0t_A      13      0
>1j0t_A      14      0
>1j0t_A      15      0
>1j0t_A      16      0
>1j0t_A      17      0
>1j0t_A      18      0
>1j0t_A      19      0
>1j0t_A      20      0
>1j0t_A      21      0
>1j0t_A      22      0
>1j0t_A      23      0
>1j0t_A      24      0
>1j0t_A      25      0
>1j0t_A      26      0
>1j0t_A      27      0
>1j0t_A      28      0
>1j0t_A      29      0
>1j0t_A      30      0
>1j0t_A      31      0
>1j0t_A      32      0
>1j0t_A      33      0
>1j0t_A      34      0
>1j0t_A      35      0
>1j0t_A      36      0
>1j0t_A      37      0
>1j0t_A      38      0
>1j0t_A      39      0
>1j0t_A      40      0
>1j0t_A      41      0
>1j0t_A      42      0
>1j0t_A      43      0
>1j0t_A      44      0
>1j0t_A      45      0
>1j0t_A      46      0
>1j0t_A      47      0
>1j0t_A      48      0
>1j0t_A      49      0
>1j0t_A      50      0
>1j0t_A      51      0
>1j0t_A      52      0
>1j0t_A      53      0
>1j0t_A      54      0
>1j0t_A      55      0
>1j0t_A      56      0
>1j0t_A      57      0
>1j0t_A      58      0
>1j0t_A      59      0
>1j0t_A      60      0
>1j0t_A      61      0
>1j0t_A      62      0
>1j0t_A      63      0
>1j0t_A      64      0
>1j0t_A      65      0
>1j0t_A      66      0
>1j0t_A      67      0
>1j0t_A      68      0
>1j0t_A      69      0
>1j0t_A      70      0
>1j0t_A      71      0
>1j0t_A      72      0
>1j0t_A      73      0
>1j0t_A      74      0
>1j0t_A      75      0
>1j0t_A      76      0
>1j0t_A      77      0
>1j0t_A      78      0
>2vry_A      1      0
>2vry_A      2      0
>2vry_A      3      0
>2vry_A      4      0
>2vry_A      5      0
>2vry_A      6      0
>2vry_A      7      0
>2vry_A      8      0
>2vry_A      9      0
>2vry_A      10      0
>2vry_A      11      0
>2vry_A      12      0
>2vry_A      13      0
>2vry_A      14      0
>2vry_A      15      0
>2vry_A      16      0
>2vry_A      17      0
>2vry_A      18      0
>2vry_A      19      0
>2vry_A      20      0
>2vry_A      21      0
>2vry_A      22      0
>2vry_A      23      0
>2vry_A      24      0
>2vry_A      25      0
>2vry_A      26      0
>2vry_A      27      0
>2vry_A      28      0
>2vry_A      29      0
>2vry_A      30      0
>2vry_A      31      0
>2vry_A      32      0
>2vry_A      33      0
>2vry_A      34      0
>2vry_A      35      0
>2vry_A      36      0
>2vry_A      37      0
>2vry_A      38      0
>2vry_A      39      0
>2vry_A      40      0
>2vry_A      41      0
>2vry_A      42      0
>2vry_A      43      0
>2vry_A      44      0
>2vry_A      45      0
>2vry_A      46      0
>2vry_A      47      0
>2vry_A      48      0
>2vry_A      49      0
>2vry_A      50      0
>2vry_A      51      0
>2vry_A      52      0
>2vry_A      53      0
>2vry_A      54      0
>2vry_A      55      0
>2vry_A      56      0
>2vry_A      57      0
>2vry_A      58      0
>2vry_A      59      0
>2vry_A      60      0
>2vry_A      61      0
>2vry_A      62      0
>2vry_A      63      0
>2vry_A      64      0
>2vry_A      65      0
>2vry_A      66      0
>2vry_A      67      0
>2vry_A      68      0
>2vry_A      69      0
>2vry_A      70      0
>2vry_A      71      0
>2vry_A      72      0
>2vry_A      73      0
>2vry_A      74      0
>2vry_A      75      0
>2vry_A      76      0
>2vry_A      77      0
>2vry_A      78      0
>2vry_A      79      0
>2vry_A      80      0
>2vry_A      81      0
>2vry_A      82      0
>2vry_A      83      0
>2vry_A      84      0
>2vry_A      85      0
>2vry_A      86      0
>2vry_A      87      0
>2vry_A      88      0
>2vry_A      89      0
>2vry_A      90      0
>2vry_A      91      0
>2vry_A      92      0
>2vry_A      93      0
>2vry_A      94      0
>2vry_A      95      0
>2vry_A      96      0
>2vry_A      97      0
>2vry_A      98      0
>2vry_A      99      0
>2vry_A      100      0
>2vry_A      101      0
>2vry_A      102      0
>2vry_A      103      0
>2vry_A      104      0
>2vry_A      105      0
>2vry_A      106      0
>2vry_A      107      0
>2vry_A      108      0
>2vry_A      109      0
>2vry_A      110      0
>2vry_A      111      0
>2vry_A      112      0
>2vry_A      113      0
>2vry_A      114      0
>2vry_A      115      0
>2vry_A      116      0
>2vry_A      117      0
>2vry_A      118      0
>2vry_A      119      0
>2vry_A      120      0
>2vry_A      121      0
>2vry_A      122      0
>2vry_A      123      0
>2vry_A      124      0
>2vry_A      125      0
>2vry_A      126      0
>2vry_A      127      0
>2vry_A      128      0
>2vry_A      129      0
>2vry_A      130      0
>2vry_A      131      0
>2vry_A      132      0
>2vry_A      133      0
>2vry_A      134      0
>2vry_A      135      0
>2vry_A      136      0
>2vry_A      137      0
>2vry_A      138      0
>2vry_A      139      0
>2vry_A      140      0
>2vry_A      141      0
>2vry_A      142      0
>2vry_A      143      0
>2vry_A      144      0
>2vry_A      145      0
>2vry_A      146      0
>2vry_A      147      0
>2vry_A      148      0
>2vry_A      149      0
>2vry_A      150      0
>2vry_A      151      0
>2vry_A      152      0
>2vry_A      153      0
>2vry_A      154      0
>DP00229      1      1
>DP00229      2      1
>DP00229      3      1
>DP00229      4      1
>DP00229      5      1
>DP00229      6      1
>DP00229      7      1
>DP00229      8      1
>DP00229      9      0
>DP00229      10      0
>DP00229      11      0
>DP00229      12      0
>DP00229      13      0
>DP00229      14      0
>DP00229      15      0
>DP00229      16      0
>DP00229      17      0
>DP00229      18      0
>DP00229      19      0
>DP00229      20      0
>DP00229      21      0
>DP00229      22      0
>DP00229      23      0
>DP00229      24      0
>DP00229      25      0
>DP00229      26      0
>DP00229      27      0
>DP00229      28      0
>DP00229      29      0
>DP00229      30      0
>DP00229      31      0
>DP00229      32      0
>DP00229      33      0
>DP00229      34      0
>DP00229      35      0
>DP00229      36      0
>DP00229      37      0
>DP00229      38      0
>DP00229      39      0
>DP00229      40      0
>DP00229      41      0
>DP00229      42      0
>DP00229      43      0
>DP00229      44      0
>DP00229      45      0
>DP00229      46      0
>DP00229      47      0
>DP00229      48      0
>DP00229      49      0
>DP00229      50      0
>DP00229      51      0
>DP00229      52      0
>DP00229      53      0
>DP00229      54      0
>DP00229      55      0
>DP00229      56      0
>DP00229      57      0
>DP00229      58      0
>DP00229      59      0
>DP00229      60      0
>DP00229      61      0
>DP00229      62      0
>DP00229      63      0
>DP00229      64      0
>DP00229      65      0
>DP00229      66      0
>DP00229      67      0
>DP00229      68      0
>DP00229      69      0
>DP00229      70      0
>DP00229      71      0
>DP00229      72      0
>DP00229      73      0
>DP00229      74      0
>DP00229      75      0
>DP00229      76      0
>DP00229      77      0
>DP00229      78      0
>DP00229      79      0
>DP00229      80      0
>DP00229      81      0
>DP00229      82      0
>DP00229      83      0
>DP00229      84      0
>DP00229      85      0
>DP00229      86      0
>DP00229      87      0
>DP00229      88      0
>DP00229      89      0
>DP00229      90      0
>DP00229      91      0
>DP00229      92      0
>DP00229      93      0
>DP00229      94      0
>DP00229      95      0
>DP00229      96      0
>DP00229      97      0
>DP00229      98      0
>DP00229      99      0
>DP00229      100      0
>DP00229      101      0
>DP00229      102      0
>DP00229      103      0
>DP00229      104      0
>DP00229      105      0
>DP00229      106      0
>DP00229      107      0
>DP00229      108      0
>DP00229      109      0
>DP00229      110      0
>DP00229      111      0
>DP00229      112      0
>DP00229      113      0
>DP00229      114      0
>DP00229      115      0
>DP00229      116      0
>DP00229      117      0
>DP00229      118      0
>DP00229      119      0
>DP00229      120      0
>DP00229      121      0
>DP00229      122      0
>DP00229      123      0
>DP00229      124      0
>DP00229      125      0
>DP00229      126      0
>DP00229      127      0
>DP00229      128      0
>DP00229      129      0
>DP00229      130      0
>DP00229      131      0
>DP00229      132      0
>DP00229      133      0
>DP00229      134      0
>DP00229      135      0
>DP00229      136      0
>DP00229      137      0
>DP00229      138      0
>DP00229      139      0
>DP00229      140      0
>DP00229      141      0
>DP00229      142      0
>DP00229      143      0
>DP00229      144      0
>DP00229      145      0
>DP00229      146      0
>DP00229      147      0
>DP00229      148      0
>DP00229      149      0
>DP00229      150      0
>DP00229      151      0
>DP00229      152      0
>DP00229      153      0
>DP00229      154      0
>DP00229      155      0
>DP00229      156      0
>DP00229      157      0
>DP00229      158      0
>DP00229      159      0
>DP00229      160      0
>DP00229      161      0
>DP00229      162      0
>DP00229      163      0
>DP00229      164      0
>DP00229      165      0
>DP00229      166      0
>DP00229      167      0
>DP00229      168      0
>DP00229      169      0
>DP00229      170      0
>DP00229      171      0
>DP00229      172      0
>DP00229      173      0
>DP00229      174      0
>DP00229      175      0
>DP00229      176      0
>DP00229      177      0
>DP00229      178      0
>DP00229      179      0
>DP00229      180      0
>DP00229      181      0
>DP00229      182      0
>DP00229      183      0
>DP00229      184      0
>DP00229      185      0
>DP00229      186      0
>DP00229      187      0
>DP00229      188      0
>DP00229      189      0
>DP00229      190      1
>DP00229      191      1
>DP00229      192      1
>DP00229      193      1
>DP00229      194      1
>DP00229      195      0
>DP00229      196      0
>DP00229      197      0
>DP00229      198      0
>DP00229      199      0
>DP00229      200      0
>DP00229      201      0
>DP00229      202      0
>DP00229      203      0
>DP00229      204      0
>DP00229      205      0
>DP00229      206      0
>DP00229      207      0
>DP00229      208      0
>DP00229      209      0
>DP00229      210      0
>DP00229      211      0
>DP00229      212      0
>DP00229      213      0
>DP00229      214      0
>DP00229      215      0
>DP00229      216      0
>DP00229      217      0
>DP00229      218      0
>DP00229      219      0
>DP00229      220      0
>DP00229      221      0
>DP00229      222      0
>DP00229      223      0
>DP00229      224      0
>DP00229      225      1
>DP00229      226      1
>DP00229      227      1
>DP00229      228      1
>DP00229      229      1
>DP00229      230      1
>DP00229      231      0
>DP00229      232      0
>DP00229      233      0
>DP00229      234      0
>DP00229      235      0
>DP00229      236      0
>DP00229      237      0
>DP00229      238      0
>DP00229      239      0
>DP00229      240      0
>DP00229      241      0
>DP00229      242      0
>DP00229      243      0
>DP00229      244      0
>DP00229      245      0
>DP00229      246      0
>DP00229      247      0
>DP00229      248      0
>DP00229      249      0
>DP00229      250      0
>DP00229      251      0
>DP00229      252      0
>DP00229      253      0
>DP00229      254      0
>DP00229      255      0
>DP00229      256      0
>DP00229      257      0
>DP00229      258      0
>DP00229      259      0
>DP00229      260      0
>DP00229      261      0
>DP00229      262      0
>DP00229      263      0
>DP00229      264      0
>DP00229      265      0
>DP00229      266      0
>DP00229      267      0
>DP00229      268      0
>DP00229      269      0
>DP00229      270      0
>DP00229      271      0
>DP00229      272      0
>DP00229      273      0
>DP00229      274      0
>DP00229      275      0
>DP00229      276      0
>DP00229      277      0
>DP00229      278      0
>DP00229      279      0
>DP00229      280      0
>DP00229      281      0
>DP00229      282      0
>DP00229      283      0
>DP00229      284      0
>DP00229      285      0
>DP00229      286      0
>DP00229      287      0
>DP00229      288      0
>DP00229      289      0
>DP00229      290      0
>DP00229      291      0
>DP00229      292      0
>DP00229      293      0
>DP00229      294      0
>DP00229      295      0
>DP00229      296      0
>DP00229      297      0
>DP00229      298      0
>DP00229      299      0
>DP00229      300      0
>DP00229      301      0
>DP00229      302      0
>DP00229      303      0
>DP00229      304      0
>DP00229      305      0
>DP00229      306      0
>DP00229      307      0
>DP00229      308      0
>DP00229      309      0
>DP00229      310      0
>DP00229      311      0
>DP00229      312      0
>DP00229      313      0
>DP00229      314      0
>DP00229      315      0
>DP00229      316      0
>DP00229      317      0
>DP00229      318      0
>DP00229      319      0
>DP00229      320      0
>DP00229      321      0
>DP00229      322      0
>DP00229      323      0
>DP00229      324      0
>DP00229      325      0
>DP00229      326      1
>DP00229      327      1
>DP00229      328      1
>DP00229      329      1
>DP00229      330      1
>DP00229      331      1
>DP00229      332      1
>DP00229      333      1
>DP00229      334      1
>DP00229      335      1
>DP00229      336      1
>DP00229      337      1
>DP00229      338      1
>DP00229      339      1
>DP00229      340      1
>DP00229      341      1
>DP00229      342      1
>DP00229      343      1
>DP00229      344      1
>DP00229      345      1
>DP00229      346      1
>DP00229      347      1
>DP00229      348      1
>DP00229      349      1
>DP00229      350      1
>DP00229      351      1
>DP00229      352      1
>DP00229      353      1
>DP00229      354      1
>DP00229      355      1
>DP00229      356      1
>DP00229      357      1
>DP00229      358      1
>DP00229      359      1
>DP00229      360      1
>DP00229      361      1
>DP00229      362      1
>DP00229      363      1
>DP00229      364      1
>DP00229      365      1
>DP00229      366      1
>DP00229      367      1
>DP00229      368      1
>DP00229      369      1
>DP00229      370      1
>DP00229      371      1
>DP00229      372      1
>DP00229      373      1
>DP00229      374      1
>DP00229      375      1
>DP00229      376      1
>DP00229      377      1
>DP00229      378      1
>DP00229      379      1
>DP00229      380      1
>DP00229      381      1
>DP00229      382      1
>DP00229      383      1
>DP00229      384      1
>DP00229      385      1
>DP00229      386      1
>DP00229      387      1
>DP00229      388      1
>DP00229      389      1
>DP00229      390      1
>DP00229      391      1
>DP00229      392      1
>DP00229      393      1
>DP00229      394      1
>DP00229      395      1
>DP00229      396      1
>DP00229      397      1
>DP00229      398      1
>DP00229      399      1
>DP00229      400      1
>DP00229      401      1
>DP00229      402      1
>DP00229      403      1
>DP00229      404      1
>DP00229      405      1
>DP00229      406      1
>DP00229      407      1
>DP00229      408      1
>DP00515      1      1
>DP00515      2      1
>DP00515      3      1
>DP00515      4      1
>DP00515      5      0
>DP00515      6      0
>DP00515      7      0
>DP00515      8      0
>DP00515      9      0
>DP00515      10      0
>DP00515      11      0
>DP00515      12      0
>DP00515      13      0
>DP00515      14      0
>DP00515      15      0
>DP00515      16      0
>DP00515      17      0
>DP00515      18      0
>DP00515      19      0
>DP00515      20      0
>DP00515      21      0
>DP00515      22      0
>DP00515      23      0
>DP00515      24      0
>DP00515      25      0
>DP00515      26      0
>DP00515      27      0
>DP00515      28      0
>DP00515      29      0
>DP00515      30      0
>DP00515      31      0
>DP00515      32      0
>DP00515      33      0
>DP00515      34      0
>DP00515      35      0
>DP00515      36      0
>DP00515      37      0
>DP00515      38      0
>DP00515      39      0
>DP00515      40      0
>DP00515      41      0
>DP00515      42      0
>DP00515      43      0
>DP00515      44      0
>DP00515      45      0
>DP00515      46      0
>DP00515      47      0
>DP00515      48      0
>DP00515      49      0
>DP00515      50      0
>DP00515      51      0
>DP00515      52      0
>DP00515      53      0
>DP00515      54      0
>DP00515      55      0
>DP00515      56      0
>DP00515      57      0
>DP00515      58      0
>DP00515      59      0
>DP00515      60      0
>DP00515      61      0
>DP00515      62      0
>DP00515      63      0
>DP00515      64      0
>DP00515      65      0
>DP00515      66      0
>DP00515      67      0
>DP00515      68      0
>DP00515      69      0
>DP00515      70      0
>DP00515      71      0
>DP00515      72      0
>DP00515      73      0
>DP00515      74      0
>DP00515      75      0
>DP00515      76      0
>DP00515      77      0
>DP00515      78      0
>DP00515      79      0
>DP00515      80      0
>DP00515      81      0
>DP00515      82      0
>DP00515      83      0
>DP00515      84      0
>DP00515      85      0
>DP00515      86      0
>DP00515      87      0
>DP00515      88      0
>DP00515      89      0
>DP00515      90      0
>DP00515      91      0
>DP00515      92      0
>DP00515      93      0
>DP00515      94      0
>DP00515      95      0
>DP00515      96      0
>DP00515      97      0
>DP00515      98      0
>DP00515      99      0
>DP00515      100      0
>DP00515      101      0
>DP00515      102      0
>DP00515      103      0
>DP00515      104      0
>DP00515      105      0
>DP00515      106      0
>DP00515      107      0
>DP00515      108      0
>DP00515      109      0
>DP00515      110      0
>DP00515      111      0
>DP00515      112      0
>DP00515      113      0
>DP00515      114      0
>DP00515      115      0
>DP00515      116      0
>DP00515      117      0
>DP00515      118      0
>DP00515      119      0
>DP00515      120      0
>DP00515      121      0
>DP00515      122      0
>DP00515      123      0
>DP00515      124      0
>DP00515      125      0
>DP00515      126      0
>DP00515      127      0
>DP00515      128      0
>DP00515      129      0
>DP00515      130      0
>DP00515      131      0
>DP00515      132      0
>DP00515      133      0
>DP00515      134      0
>DP00515      135      0
>DP00515      136      0
>DP00515      137      0
>DP00515      138      0
>DP00515      139      0
>DP00515      140      0
>DP00515      141      0
>DP00515      142      0
>DP00515      143      0
>DP00515      144      0
>DP00515      145      0
>DP00515      146      0
>DP00515      147      0
>DP00515      148      0
>DP00515      149      0
>DP00515      150      0
>DP00515      151      0
>DP00515      152      0
>DP00515      153      0
>DP00515      154      0
>DP00515      155      0
>DP00515      156      0
>DP00515      157      0
>DP00515      158      0
>DP00515      159      0
>DP00515      160      0
>DP00515      161      0
>DP00515      162      0
>DP00515      163      0
>DP00515      164      0
>DP00515      165      0
>DP00515      166      0
>DP00515      167      0
>DP00515      168      0
>DP00515      169      0
>DP00515      170      0
>DP00515      171      0
>DP00515      172      0
>DP00515      173      0
>DP00515      174      0
>DP00515      175      0
>DP00515      176      0
>DP00515      177      0
>DP00515      178      0
>DP00515      179      0
>DP00515      180      0
>DP00515      181      0
>DP00515      182      0
>DP00515      183      0
>DP00515      184      0
>DP00515      185      0
>DP00515      186      0
>DP00515      187      0
>DP00515      188      0
>DP00515      189      0
>DP00515      190      0
>DP00515      191      0
>DP00515      192      0
>DP00515      193      0
>DP00515      194      0
>DP00515      195      0
>DP00515      196      0
>DP00515      197      0
>DP00515      198      0
>DP00515      199      0
>DP00515      200      0
>DP00515      201      0
>DP00515      202      0
>DP00515      203      0
>DP00515      204      0
>DP00515      205      0
>DP00515      206      0
>DP00515      207      0
>DP00515      208      0
>DP00515      209      0
>DP00515      210      0
>DP00515      211      0
>DP00515      212      0
>DP00515      213      0
>DP00515      214      0
>DP00515      215      0
>DP00515      216      0
>DP00515      217      0
>DP00515      218      0
>DP00515      219      0
>DP00515      220      0
>DP00515      221      0
>DP00515      222      0
>DP00515      223      0
>DP00515      224      0
>DP00515      225      0
>DP00515      226      0
>DP00515      227      0
>DP00515      228      0
>DP00515      229      0
>DP00515      230      0
>DP00515      231      0
>DP00515      232      0
>DP00515      233      0
>DP00515      234      0
>DP00515      235      0
>DP00515      236      0
>DP00515      237      0
>DP00515      238      0
>DP00515      239      0
>DP00515      240      0
>DP00515      241      0
>DP00515      242      0
>DP00515      243      0
>DP00515      244      0
>DP00515      245      0
>DP00515      246      0
>DP00515      247      0
>DP00515      248      0
>DP00515      249      0
>DP00515      250      0
>DP00515      251      0
>DP00515      252      0
>DP00515      253      0
>DP00515      254      0
>DP00515      255      0
>DP00515      256      0
>DP00515      257      0
>DP00515      258      0
>DP00515      259      0
>DP00515      260      0
>DP00515      261      0
>DP00515      262      0
>DP00515      263      0
>DP00515      264      0
>DP00515      265      0
>DP00515      266      0
>DP00515      267      0
>DP00515      268      0
>DP00515      269      0
>DP00515      270      0
>DP00515      271      0
>DP00515      272      0
>DP00515      273      0
>DP00515      274      0
>DP00515      275      0
>DP00515      276      0
>DP00515      277      0
>DP00515      278      0
>DP00515      279      0
>DP00515      280      0
>DP00515      281      0
>DP00515      282      0
>DP00515      283      0
>DP00515      284      0
>DP00515      285      0
>DP00515      286      0
>DP00515      287      0
>DP00515      288      0
>DP00515      289      0
>DP00515      290      0
>DP00515      291      0
>DP00515      292      0
>DP00515      293      0
>DP00515      294      0
>DP00515      295      0
>DP00515      296      0
>DP00515      297      0
>DP00515      298      0
>DP00515      299      0
>DP00515      300      0
>DP00515      301      0
>DP00515      302      0
>DP00515      303      0
>DP00515      304      0
>DP00515      305      0
>DP00515      306      0
>DP00515      307      0
>DP00515      308      0
>DP00515      309      0
>DP00515      310      0
>DP00515      311      0
>DP00515      312      0
>DP00515      313      0
>DP00515      314      0
>DP00515      315      0
>DP00515      316      0
>DP00515      317      0
>DP00515      318      0
>DP00515      319      0
>DP00515      320      0
>DP00515      321      0
>DP00515      322      0
>DP00515      323      0
>DP00515      324      0
>DP00515      325      0
>DP00515      326      0
>DP00515      327      0
>DP00515      328      0
>DP00515      329      0
>DP00515      330      0
>DP00515      331      0
>DP00515      332      0
>DP00515      333      0
>DP00515      334      0
>DP00515      335      0
>DP00515      336      0
>DP00515      337      0
>DP00515      338      0
>DP00515      339      0
>DP00515      340      0
>DP00515      341      0
>DP00515      342      0
>DP00515      343      0
>DP00515      344      0
>DP00515      345      0
>DP00515      346      0
>DP00515      347      0
>DP00515      348      0
>DP00515      349      0
>DP00515      350      0
>DP00515      351      0
>DP00515      352      0
>DP00515      353      0
>DP00515      354      0
>DP00515      355      0
>DP00515      356      0
>DP00515      357      0
>DP00515      358      0
>DP00515      359      0
>DP00515      360      0
>DP00515      361      0
>DP00515      362      0
>DP00515      363      0
>DP00515      364      0
>DP00515      365      0
>DP00515      366      0
>DP00515      367      0
>DP00515      368      0
>DP00515      369      0
>DP00515      370      0
>DP00515      371      0
>DP00515      372      0
>DP00515      373      0
>DP00515      374      0
>DP00515      375      0
>DP00515      376      0
>DP00515      377      0
>DP00515      378      0
>DP00515      379      0
>DP00515      380      0
>DP00515      381      0
>DP00515      382      0
>DP00515      383      0
>DP00515      384      0
>DP00515      385      0
>DP00515      386      0
>DP00515      387      0
>DP00515      388      0
>DP00515      389      0
>DP00515      390      0
>DP00515      391      0
>DP00515      392      0
>DP00515      393      0
>DP00515      394      0
>DP00515      395      0
>DP00515      396      0
>DP00515      397      0
>DP00515      398      0
>DP00515      399      0
>DP00515      400      0
>DP00515      401      0
>DP00515      402      0
>DP00515      403      0
>DP00515      404      0
>DP00515      405      0
>DP00515      406      0
>DP00515      407      0
>DP00515      408      0
>DP00515      409      0
>DP00515      410      0
>DP00515      411      0
>DP00515      412      0
>DP00515      413      0
>DP00515      414      0
>DP00515      415      0
>DP00515      416      0
>DP00515      417      0
>DP00515      418      0
>DP00515      419      0
>DP00515      420      0
>DP00515      421      0
>DP00515      422      0
>DP00515      423      0
>DP00515      424      0
>DP00515      425      0
>DP00515      426      0
>DP00515      427      0
>DP00515      428      0
>DP00515      429      0
>DP00515      430      0
>DP00515      431      0
>DP00515      432      0
>DP00515      433      0
>DP00515      434      0
>DP00515      435      0
>DP00515      436      0
>DP00515      437      0
>DP00515      438      0
>DP00515      439      0
>DP00515      440      0
>DP00515      441      0
>DP00515      442      0
>DP00515      443      0
>DP00515      444      0
>DP00515      445      0
>DP00515      446      0
>DP00515      447      0
>DP00515      448      0
>DP00515      449      0
>DP00515      450      0
>DP00515      451      0
>DP00515      452      0
>DP00515      453      0
>DP00515      454      0
>DP00515      455      0
>DP00515      456      0
>DP00515      457      0
>DP00515      458      0
>DP00515      459      0
>DP00515      460      0
>DP00515      461      0
>DP00515      462      0
>DP00515      463      0
>DP00515      464      0
>DP00515      465      0
>DP00515      466      0
>DP00515      467      0
>DP00515      468      0
>DP00515      469      0
>DP00515      470      0
>DP00515      471      0
>DP00515      472      0
>DP00515      473      0
>DP00515      474      0
>DP00515      475      0
>DP00515      476      0
>DP00515      477      0
>DP00515      478      0
>DP00515      479      0
>DP00515      480      0
>DP00515      481      0
>DP00515      482      0
>DP00515      483      0
>DP00515      484      0
>DP00515      485      0
>DP00515      486      0
>DP00515      487      0
>DP00515      488      0
>DP00515      489      0
>DP00515      490      0
>DP00515      491      0
>DP00515      492      0
>DP00515      493      0
>DP00515      494      0
>DP00515      495      0
>DP00515      496      0
>DP00515      497      0
>DP00515      498      0
>DP00515      499      0
>DP00515      500      0
>DP00515      501      0
>DP00515      502      0
>DP00515      503      0
>DP00515      504      0
>DP00515      505      0
>DP00515      506      0
>DP00515      507      0
>DP00515      508      0
>DP00515      509      0
>DP00515      510      0
>DP00515      511      0
>DP00515      512      0
>DP00515      513      0
>DP00515      514      0
>DP00515      515      0
>DP00515      516      0
>DP00515      517      0
>DP00515      518      0
>DP00515      519      0
>DP00515      520      0
>DP00515      521      0
>DP00515      522      0
>DP00515      523      0
>DP00515      524      0
>DP00515      525      0
>DP00515      526      0
>DP00515      527      0
>DP00515      528      0
>DP00515      529      0
>DP00515      530      0
>DP00515      531      0
>DP00515      532      0
>DP00515      533      0
>DP00515      534      0
>DP00515      535      0
>DP00515      536      0
>DP00515      537      0
>DP00515      538      0
>DP00515      539      0
>DP00515      540      0
>DP00515      541      0
>DP00515      542      0
>DP00515      543      0
>DP00515      544      0
>DP00515      545      0
>DP00515      546      0
>DP00515      547      0
>DP00515      548      0
>DP00515      549      0
>DP00515      550      0
>DP00515      551      0
>DP00515      552      0
>DP00515      553      0
>DP00515      554      0
>DP00515      555      0
>DP00515      556      0
>DP00515      557      0
>DP00515      558      0
>DP00515      559      0
>DP00515      560      0
>DP00515      561      0
>DP00515      562      0
>DP00515      563      0
>DP00515      564      0
>DP00515      565      0
>DP00515      566      0
>DP00515      567      0
>DP00515      568      0
>DP00515      569      0
>DP00515      570      0
>DP00515      571      0
>DP00515      572      0
>DP00515      573      0
>DP00515      574      0
>DP00515      575      0
>DP00515      576      0
>DP00515      577      0
>DP00515      578      0
>DP00515      579      0
>DP00515      580      0
>DP00515      581      0
>DP00515      582      0
>DP00515      583      1
>DP00515      584      1
>DP00515      585      1
>DP00515      586      0
>DP00515      587      0
>DP00515      588      0
>DP00515      589      0
>DP00515      590      0
>DP00515      591      0
>DP00515      592      0
>DP00515      593      0
>DP00515      594      0
>DP00515      595      0
>DP00515      596      0
>DP00515      597      0
>DP00515      598      0
>DP00515      599      0
>DP00515      600      0
>DP00515      601      0
>DP00515      602      0
>DP00515      603      0
>DP00515      604      0
>DP00515      605      0
>DP00515      606      0
>DP00515      607      0
>DP00515      608      0
>DP00515      609      0
>DP00261      1      0
>DP00261      2      0
>DP00261      3      0
>DP00261      4      0
>DP00261      5      0
>DP00261      6      0
>DP00261      7      0
>DP00261      8      0
>DP00261      9      0
>DP00261      10      0
>DP00261      11      0
>DP00261      12      0
>DP00261      13      0
>DP00261      14      0
>DP00261      15      0
>DP00261      16      0
>DP00261      17      0
>DP00261      18      0
>DP00261      19      0
>DP00261      20      0
>DP00261      21      0
>DP00261      22      0
>DP00261      23      0
>DP00261      24      0
>DP00261      25      0
>DP00261      26      0
>DP00261      27      0
>DP00261      28      0
>DP00261      29      0
>DP00261      30      0
>DP00261      31      0
>DP00261      32      0
>DP00261      33      0
>DP00261      34      0
>DP00261      35      0
>DP00261      36      0
>DP00261      37      0
>DP00261      38      0
>DP00261      39      0
>DP00261      40      0
>DP00261      41      0
>DP00261      42      1
>DP00261      43      1
>DP00261      44      1
>DP00261      45      1
>DP00261      46      1
>DP00261      47      1
>DP00261      48      1
>DP00261      49      0
>DP00261      50      0
>DP00261      51      0
>DP00261      52      0
>DP00261      53      0
>DP00261      54      0
>DP00261      55      0
>DP00261      56      0
>DP00261      57      0
>DP00261      58      0
>DP00261      59      0
>DP00261      60      0
>DP00261      61      0
>DP00261      62      0
>DP00261      63      0
>DP00261      64      0
>DP00261      65      0
>DP00261      66      0
>DP00261      67      0
>DP00261      68      0
>DP00261      69      0
>DP00261      70      0
>DP00261      71      0
>DP00261      72      0
>DP00261      73      0
>DP00261      74      0
>DP00261      75      0
>DP00261      76      0
>DP00261      77      0
>DP00261      78      0
>DP00261      79      0
>DP00261      80      0
>DP00261      81      0
>DP00261      82      0
>DP00261      83      0
>DP00261      84      0
>DP00261      85      0
>DP00261      86      0
>DP00261      87      0
>DP00261      88      0
>DP00261      89      0
>DP00261      90      0
>DP00261      91      0
>DP00261      92      0
>DP00261      93      0
>DP00261      94      0
>DP00261      95      0
>DP00261      96      0
>DP00261      97      0
>DP00261      98      0
>DP00261      99      0
>DP00261      100      0
>DP00261      101      0
>DP00261      102      0
>DP00261      103      0
>DP00261      104      0
>DP00261      105      0
>DP00261      106      0
>DP00261      107      1
>DP00261      108      1
>DP00261      109      1
>DP00261      110      1
>DP00261      111      1
>DP00261      112      1
>DP00261      113      1
>DP00261      114      1
>DP00261      115      1
>DP00261      116      1
>DP00261      117      1
>DP00261      118      1
>DP00261      119      0
>DP00261      120      0
>DP00261      121      0
>DP00261      122      0
>DP00261      123      0
>DP00261      124      0
>DP00261      125      0
>DP00261      126      0
>DP00261      127      0
>DP00261      128      0
>DP00261      129      0
>DP00261      130      0
>DP00261      131      0
>DP00261      132      0
>DP00261      133      0
>DP00261      134      0
>DP00261      135      0
>DP00261      136      0
>DP00261      137      0
>DP00261      138      0
>DP00261      139      0
>DP00261      140      0
>DP00261      141      0
>DP00261      142      0
>DP00261      143      0
>DP00261      144      0
>DP00261      145      0
>DP00261      146      0
>DP00261      147      0
>DP00261      148      0
>DP00261      149      0
>DP00261      150      0
>DP00261      151      0
>DP00261      152      0
>DP00261      153      0
>DP00261      154      0
>DP00261      155      0
>DP00261      156      0
>DP00261      157      0
>DP00261      158      0
>DP00261      159      0
>DP00261      160      0
>DP00261      161      0
>DP00261      162      0
>DP00261      163      0
>DP00261      164      0
>DP00261      165      0
>DP00261      166      0
>DP00261      167      0
>DP00261      168      0
>DP00261      169      0
>DP00261      170      0
>DP00261      171      0
>DP00261      172      0
>DP00261      173      0
>DP00261      174      0
>DP00261      175      0
>DP00261      176      0
>DP00261      177      0
>DP00261      178      0
>DP00261      179      0
>DP00261      180      0
>DP00261      181      0
>DP00261      182      0
>DP00261      183      0
>DP00261      184      0
>DP00261      185      0
>DP00261      186      0
>DP00261      187      0
>DP00261      188      0
>DP00261      189      0
>DP00261      190      0
>DP00261      191      0
>DP00261      192      0
>DP00261      193      0
>DP00261      194      0
>DP00261      195      0
>DP00261      196      0
>DP00261      197      0
>DP00261      198      0
>DP00261      199      0
>DP00261      200      0
>DP00261      201      0
>DP00261      202      0
>DP00261      203      0
>DP00261      204      0
>DP00261      205      0
>DP00261      206      0
>DP00261      207      0
>DP00261      208      0
>DP00261      209      0
>DP00261      210      0
>DP00261      211      0
>DP00261      212      0
>DP00261      213      0
>DP00261      214      0
>DP00261      215      0
>DP00261      216      0
>DP00261      217      0
>DP00261      218      0
>DP00261      219      0
>DP00261      220      0
>DP00261      221      0
>DP00261      222      0
>DP00261      223      0
>DP00261      224      0
>DP00261      225      0
>DP00261      226      0
>DP00261      227      0
>DP00261      228      0
>DP00261      229      0
>DP00261      230      0
>DP00261      231      0
>DP00261      232      0
>DP00261      233      0
>DP00261      234      0
>DP00261      235      0
>DP00261      236      0
>DP00261      237      0
>DP00261      238      0
>DP00261      239      0
>DP00261      240      0
>DP00261      241      0
>DP00261      242      0
>DP00261      243      0
>DP00261      244      0
>DP00261      245      0
>DP00261      246      0
>DP00261      247      0
>DP00261      248      0
>DP00261      249      0
>DP00261      250      0
>DP00261      251      0
>DP00261      252      0
>DP00261      253      0
>DP00261      254      0
>DP00261      255      0
>DP00261      256      0
>DP00261      257      0
>DP00261      258      0
>DP00261      259      0
>DP00261      260      0
>DP00261      261      0
>DP00261      262      0
>DP00261      263      0
>DP00261      264      0
>DP00261      265      0
>DP00261      266      0
>DP00261      267      0
>DP00261      268      0
>DP00261      269      0
>DP00261      270      0
>DP00261      271      0
>DP00261      272      0
>DP00261      273      0
>DP00261      274      0
>DP00261      275      0
>DP00261      276      0
>DP00261      277      0
>DP00261      278      0
>DP00261      279      0
>DP00261      280      0
>DP00261      281      0
>DP00261      282      0
>DP00261      283      0
>DP00261      284      0
>DP00261      285      0
>DP00261      286      0
>DP00261      287      0
>DP00261      288      0
>DP00261      289      0
>DP00261      290      0
>DP00261      291      0
>DP00261      292      0
>DP00261      293      0
>DP00261      294      0
>DP00261      295      0
>DP00261      296      0
>DP00261      297      0
>DP00261      298      0
>DP00261      299      0
>DP00261      300      0
>DP00261      301      0
>DP00261      302      0
>DP00261      303      0
>DP00261      304      0
>DP00261      305      0
>DP00261      306      0
>DP00261      307      0
>DP00261      308      0
>DP00261      309      0
>DP00261      310      0
>DP00261      311      0
>DP00261      312      0
>DP00261      313      0
>DP00261      314      0
>DP00261      315      0
>DP00261      316      0
>DP00261      317      0
>DP00261      318      0
>DP00261      319      0
>DP00261      320      0
>DP00261      321      0
>DP00261      322      0
>DP00261      323      0
>DP00261      324      0
>DP00261      325      0
>DP00261      326      0
>DP00261      327      0
>DP00261      328      0
>DP00261      329      0
>DP00261      330      0
>DP00261      331      0
>DP00261      332      0
>DP00261      333      0
>DP00261      334      0
>DP00261      335      0
>DP00261      336      0
>DP00261      337      0
>DP00261      338      0
>DP00261      339      0
>DP00261      340      0
>DP00261      341      0
>DP00261      342      0
>DP00261      343      0
>DP00261      344      0
>DP00261      345      0
>DP00261      346      0
>DP00261      347      0
>DP00261      348      0
>DP00261      349      0
>DP00261      350      0
>DP00261      351      0
>DP00261      352      0
>DP00261      353      0
>DP00261      354      0
>DP00261      355      0
>DP00261      356      0
>DP00261      357      0
>DP00261      358      0
>DP00261      359      0
>DP00261      360      0
>DP00261      361      0
>DP00261      362      0
>DP00261      363      0
>DP00261      364      0
>DP00261      365      0
>DP00261      366      0
>DP00261      367      0
>DP00261      368      0
>DP00261      369      0
>DP00261      370      0
>DP00261      371      0
>DP00261      372      0
>DP00261      373      0
>DP00261      374      0
>DP00261      375      0
>DP00261      376      0
>DP00261      377      0
>DP00261      378      0
>DP00261      379      0
>DP00261      380      0
>1o08_A      1      0
>1o08_A      2      0
>1o08_A      3      0
>1o08_A      4      0
>1o08_A      5      0
>1o08_A      6      0
>1o08_A      7      0
>1o08_A      8      0
>1o08_A      9      0
>1o08_A      10      0
>1o08_A      11      0
>1o08_A      12      0
>1o08_A      13      0
>1o08_A      14      0
>1o08_A      15      0
>1o08_A      16      0
>1o08_A      17      0
>1o08_A      18      0
>1o08_A      19      0
>1o08_A      20      0
>1o08_A      21      0
>1o08_A      22      0
>1o08_A      23      0
>1o08_A      24      0
>1o08_A      25      0
>1o08_A      26      0
>1o08_A      27      0
>1o08_A      28      0
>1o08_A      29      0
>1o08_A      30      0
>1o08_A      31      0
>1o08_A      32      0
>1o08_A      33      0
>1o08_A      34      0
>1o08_A      35      0
>1o08_A      36      0
>1o08_A      37      0
>1o08_A      38      0
>1o08_A      39      0
>1o08_A      40      0
>1o08_A      41      0
>1o08_A      42      0
>1o08_A      43      0
>1o08_A      44      0
>1o08_A      45      0
>1o08_A      46      0
>1o08_A      47      0
>1o08_A      48      0
>1o08_A      49      0
>1o08_A      50      0
>1o08_A      51      0
>1o08_A      52      0
>1o08_A      53      0
>1o08_A      54      0
>1o08_A      55      0
>1o08_A      56      0
>1o08_A      57      0
>1o08_A      58      0
>1o08_A      59      0
>1o08_A      60      0
>1o08_A      61      0
>1o08_A      62      0
>1o08_A      63      0
>1o08_A      64      0
>1o08_A      65      0
>1o08_A      66      0
>1o08_A      67      0
>1o08_A      68      0
>1o08_A      69      0
>1o08_A      70      0
>1o08_A      71      0
>1o08_A      72      0
>1o08_A      73      0
>1o08_A      74      0
>1o08_A      75      0
>1o08_A      76      0
>1o08_A      77      0
>1o08_A      78      0
>1o08_A      79      0
>1o08_A      80      0
>1o08_A      81      0
>1o08_A      82      0
>1o08_A      83      0
>1o08_A      84      0
>1o08_A      85      0
>1o08_A      86      0
>1o08_A      87      0
>1o08_A      88      0
>1o08_A      89      0
>1o08_A      90      0
>1o08_A      91      0
>1o08_A      92      0
>1o08_A      93      0
>1o08_A      94      0
>1o08_A      95      0
>1o08_A      96      0
>1o08_A      97      0
>1o08_A      98      0
>1o08_A      99      0
>1o08_A      100      0
>1o08_A      101      0
>1o08_A      102      0
>1o08_A      103      0
>1o08_A      104      0
>1o08_A      105      0
>1o08_A      106      0
>1o08_A      107      0
>1o08_A      108      0
>1o08_A      109      0
>1o08_A      110      0
>1o08_A      111      0
>1o08_A      112      0
>1o08_A      113      0
>1o08_A      114      0
>1o08_A      115      0
>1o08_A      116      0
>1o08_A      117      0
>1o08_A      118      0
>1o08_A      119      0
>1o08_A      120      0
>1o08_A      121      0
>1o08_A      122      0
>1o08_A      123      0
>1o08_A      124      0
>1o08_A      125      0
>1o08_A      126      0
>1o08_A      127      0
>1o08_A      128      0
>1o08_A      129      0
>1o08_A      130      0
>1o08_A      131      0
>1o08_A      132      0
>1o08_A      133      0
>1o08_A      134      0
>1o08_A      135      0
>1o08_A      136      0
>1o08_A      137      0
>1o08_A      138      0
>1o08_A      139      0
>1o08_A      140      0
>1o08_A      141      0
>1o08_A      142      0
>1o08_A      143      0
>1o08_A      144      0
>1o08_A      145      0
>1o08_A      146      0
>1o08_A      147      0
>1o08_A      148      0
>1o08_A      149      0
>1o08_A      150      0
>1o08_A      151      0
>1o08_A      152      0
>1o08_A      153      0
>1o08_A      154      0
>1o08_A      155      0
>1o08_A      156      0
>1o08_A      157      0
>1o08_A      158      0
>1o08_A      159      0
>1o08_A      160      0
>1o08_A      161      0
>1o08_A      162      0
>1o08_A      163      0
>1o08_A      164      0
>1o08_A      165      0
>1o08_A      166      0
>1o08_A      167      0
>1o08_A      168      0
>1o08_A      169      0
>1o08_A      170      0
>1o08_A      171      0
>1o08_A      172      0
>1o08_A      173      0
>1o08_A      174      0
>1o08_A      175      0
>1o08_A      176      0
>1o08_A      177      0
>1o08_A      178      0
>1o08_A      179      0
>1o08_A      180      0
>1o08_A      181      0
>1o08_A      182      0
>1o08_A      183      0
>1o08_A      184      0
>1o08_A      185      0
>1o08_A      186      0
>1o08_A      187      0
>1o08_A      188      0
>1o08_A      189      0
>1o08_A      190      0
>1o08_A      191      0
>1o08_A      192      0
>1o08_A      193      0
>1o08_A      194      0
>1o08_A      195      0
>1o08_A      196      0
>1o08_A      197      0
>1o08_A      198      0
>1o08_A      199      0
>1o08_A      200      0
>1o08_A      201      0
>1o08_A      202      0
>1o08_A      203      0
>1o08_A      204      0
>1o08_A      205      0
>1o08_A      206      0
>1o08_A      207      0
>1o08_A      208      0
>1o08_A      209      0
>1o08_A      210      0
>1o08_A      211      0
>1o08_A      212      0
>1o08_A      213      0
>1o08_A      214      0
>1o08_A      215      0
>1o08_A      216      0
>1o08_A      217      0
>1o08_A      218      0
>1o08_A      219      0
>1o08_A      220      0
>1o08_A      221      0
>2hbt_A      1      0
>2hbt_A      2      0
>2hbt_A      3      0
>2hbt_A      4      0
>2hbt_A      5      0
>2hbt_A      6      0
>2hbt_A      7      0
>2hbt_A      8      0
>2hbt_A      9      0
>2hbt_A      10      0
>2hbt_A      11      0
>2hbt_A      12      0
>2hbt_A      13      0
>2hbt_A      14      0
>2hbt_A      15      0
>2hbt_A      16      0
>2hbt_A      17      0
>2hbt_A      18      0
>2hbt_A      19      0
>2hbt_A      20      0
>2hbt_A      21      0
>2hbt_A      22      0
>2hbt_A      23      0
>2hbt_A      24      0
>2hbt_A      25      0
>2hbt_A      26      0
>2hbt_A      27      0
>2hbt_A      28      0
>2hbt_A      29      0
>2hbt_A      30      0
>2hbt_A      31      0
>2hbt_A      32      0
>2hbt_A      33      0
>2hbt_A      34      0
>2hbt_A      35      0
>2hbt_A      36      0
>2hbt_A      37      0
>2hbt_A      38      0
>2hbt_A      39      0
>2hbt_A      40      0
>2hbt_A      41      0
>2hbt_A      42      0
>2hbt_A      43      0
>2hbt_A      44      0
>2hbt_A      45      0
>2hbt_A      46      0
>2hbt_A      47      0
>2hbt_A      48      0
>2hbt_A      49      0
>2hbt_A      50      0
>2hbt_A      51      0
>2hbt_A      52      0
>2hbt_A      53      0
>2hbt_A      54      0
>2hbt_A      55      0
>2hbt_A      56      0
>2hbt_A      57      0
>2hbt_A      58      0
>2hbt_A      59      0
>2hbt_A      60      0
>2hbt_A      61      0
>2hbt_A      62      0
>2hbt_A      63      0
>2hbt_A      64      0
>2hbt_A      65      0
>2hbt_A      66      0
>2hbt_A      67      0
>2hbt_A      68      0
>2hbt_A      69      0
>2hbt_A      70      0
>2hbt_A      71      0
>2hbt_A      72      0
>2hbt_A      73      0
>2hbt_A      74      0
>2hbt_A      75      0
>2hbt_A      76      0
>2hbt_A      77      0
>2hbt_A      78      0
>2hbt_A      79      0
>2hbt_A      80      0
>2hbt_A      81      0
>2hbt_A      82      0
>2hbt_A      83      0
>2hbt_A      84      0
>2hbt_A      85      0
>2hbt_A      86      0
>2hbt_A      87      0
>2hbt_A      88      0
>2hbt_A      89      0
>2hbt_A      90      0
>2hbt_A      91      0
>2hbt_A      92      0
>2hbt_A      93      0
>2hbt_A      94      0
>2hbt_A      95      0
>2hbt_A      96      0
>2hbt_A      97      0
>2hbt_A      98      0
>2hbt_A      99      0
>2hbt_A      100      0
>2hbt_A      101      0
>2hbt_A      102      0
>2hbt_A      103      0
>2hbt_A      104      0
>2hbt_A      105      0
>2hbt_A      106      0
>2hbt_A      107      0
>2hbt_A      108      0
>2hbt_A      109      0
>2hbt_A      110      0
>2hbt_A      111      0
>2hbt_A      112      0
>2hbt_A      113      0
>2hbt_A      114      0
>2hbt_A      115      0
>2hbt_A      116      0
>2hbt_A      117      0
>2hbt_A      118      0
>2hbt_A      119      0
>2hbt_A      120      0
>2hbt_A      121      0
>2hbt_A      122      0
>2hbt_A      123      0
>2hbt_A      124      0
>2hbt_A      125      0
>2hbt_A      126      0
>2hbt_A      127      0
>2hbt_A      128      0
>2hbt_A      129      0
>2hbt_A      130      0
>2hbt_A      131      0
>2hbt_A      132      0
>2hbt_A      133      0
>2hbt_A      134      0
>2hbt_A      135      0
>2hbt_A      136      0
>2hbt_A      137      0
>2hbt_A      138      0
>2hbt_A      139      0
>2hbt_A      140      0
>2hbt_A      141      0
>2hbt_A      142      0
>2hbt_A      143      0
>2hbt_A      144      0
>2hbt_A      145      0
>2hbt_A      146      0
>2hbt_A      147      0
>2hbt_A      148      0
>2hbt_A      149      0
>2hbt_A      150      0
>2hbt_A      151      0
>2hbt_A      152      0
>2hbt_A      153      0
>2hbt_A      154      0
>2hbt_A      155      0
>2hbt_A      156      0
>2hbt_A      157      0
>2hbt_A      158      0
>2hbt_A      159      0
>2hbt_A      160      0
>2hbt_A      161      0
>2hbt_A      162      0
>2hbt_A      163      0
>2hbt_A      164      0
>2hbt_A      165      0
>2hbt_A      166      0
>2hbt_A      167      0
>2hbt_A      168      0
>2hbt_A      169      0
>2hbt_A      170      0
>2hbt_A      171      0
>2hbt_A      172      0
>2hbt_A      173      0
>2hbt_A      174      0
>2hbt_A      175      0
>2hbt_A      176      0
>2hbt_A      177      0
>2hbt_A      178      0
>2hbt_A      179      0
>2hbt_A      180      0
>2hbt_A      181      0
>2hbt_A      182      0
>2hbt_A      183      0
>2hbt_A      184      0
>2hbt_A      185      0
>2hbt_A      186      0
>2hbt_A      187      0
>2hbt_A      188      0
>2hbt_A      189      0
>2hbt_A      190      0
>2hbt_A      191      0
>2hbt_A      192      0
>2hbt_A      193      0
>2hbt_A      194      0
>2hbt_A      195      0
>2hbt_A      196      0
>2hbt_A      197      0
>2hbt_A      198      0
>2hbt_A      199      0
>2hbt_A      200      0
>2hbt_A      201      0
>2hbt_A      202      0
>2hbt_A      203      0
>2hbt_A      204      0
>2hbt_A      205      0
>2hbt_A      206      0
>2hbt_A      207      0
>2hbt_A      208      0
>2hbt_A      209      0
>2hbt_A      210      0
>2hbt_A      211      0
>2hbt_A      212      0
>2hbt_A      213      0
>2hbt_A      214      0
>2hbt_A      215      0
>2hbt_A      216      0
>2hbt_A      217      0
>2hbt_A      218      0
>2hbt_A      219      0
>2hbt_A      220      0
>2hbt_A      221      0
>2hbt_A      222      0
>2hbt_A      223      0
>2hbt_A      224      0
>2hbt_A      225      0
>2hbt_A      226      0
>2hbt_A      227      0
>2hbt_A      228      0
>2hbt_A      229      0
>2hbt_A      230      0
>2hbt_A      231      0
>2hbt_A      232      0
>2hbt_A      233      0
>2hbt_A      234      0
>2hbt_A      235      0
>2hbt_A      236      0
>2hbt_A      237      0
>2hbt_A      238      0
>2hbt_A      239      0
>2hbt_A      240      0
>2hbt_A      241      0
>2hbt_A      242      0
>2hbt_A      243      0
>2hbt_A      244      0
>2hbt_A      245      0
>2hbt_A      246      0
>2hbt_A      247      0
>DP00122      1      1
>DP00122      2      1
>DP00122      3      1
>DP00122      4      1
>DP00122      5      1
>DP00122      6      1
>DP00122      7      1
>DP00122      8      1
>DP00122      9      1
>DP00122      10      1
>DP00122      11      1
>DP00122      12      1
>DP00122      13      1
>DP00122      14      1
>DP00122      15      1
>DP00122      16      1
>DP00122      17      1
>DP00122      18      1
>DP00122      19      1
>DP00122      20      1
>DP00122      21      1
>DP00122      22      1
>DP00122      23      1
>DP00122      24      1
>DP00122      25      1
>DP00122      26      1
>DP00122      27      1
>DP00122      28      1
>DP00122      29      1
>DP00122      30      1
>DP00122      31      1
>DP00122      32      1
>DP00122      33      1
>DP00122      34      1
>DP00122      35      1
>DP00122      36      1
>DP00122      37      1
>DP00122      38      1
>DP00122      39      1
>DP00122      40      1
>DP00122      41      1
>DP00122      42      1
>DP00122      43      1
>DP00122      44      1
>DP00122      45      1
>DP00122      46      1
>DP00122      47      1
>DP00122      48      1
>DP00122      49      1
>DP00122      50      1
>DP00122      51      1
>DP00122      52      1
>DP00122      53      1
>DP00122      54      1
>DP00122      55      1
>DP00122      56      1
>DP00122      57      1
>DP00122      58      1
>DP00122      59      1
>DP00122      60      1
>DP00122      61      1
>DP00122      62      1
>DP00122      63      1
>DP00122      64      1
>DP00122      65      1
>DP00122      66      1
>DP00122      67      1
>DP00122      68      1
>DP00122      69      1
>DP00122      70      1
>DP00122      71      1
>DP00122      72      1
>DP00122      73      1
>DP00122      74      1
>DP00122      75      1
>DP00122      76      1
>DP00122      77      1
>DP00122      78      1
>DP00122      79      1
>DP00122      80      1
>DP00122      81      1
>DP00122      82      1
>DP00122      83      1
>DP00122      84      1
>DP00122      85      1
>DP00122      86      1
>DP00122      87      1
>DP00122      88      1
>DP00122      89      1
>DP00122      90      1
>DP00122      91      1
>DP00122      92      1
>DP00122      93      1
>DP00122      94      1
>DP00122      95      1
>DP00122      96      1
>DP00122      97      1
>DP00122      98      1
>DP00122      99      1
>DP00122      100      1
>DP00122      101      1
>DP00122      102      1
>DP00122      103      1
>DP00122      104      1
>DP00122      105      1
>DP00122      106      1
>DP00122      107      1
>DP00122      108      1
>DP00122      109      1
>DP00122      110      1
>DP00122      111      1
>DP00122      112      1
>DP00122      113      1
>DP00122      114      1
>DP00122      115      1
>DP00122      116      1
>DP00122      117      1
>DP00122      118      1
>DP00122      119      1
>DP00122      120      1
>DP00122      121      1
>DP00122      122      1
>DP00122      123      1
>DP00122      124      1
>DP00122      125      1
>DP00122      126      1
>DP00122      127      1
>DP00122      128      1
>DP00122      129      1
>DP00122      130      1
>DP00122      131      1
>DP00122      132      1
>DP00122      133      1
>DP00122      134      1
>DP00122      135      1
>DP00122      136      1
>DP00122      137      1
>DP00122      138      1
>DP00122      139      1
>DP00122      140      1
>DP00122      141      1
>DP00122      142      1
>DP00122      143      1
>DP00122      144      1
>DP00122      145      1
>DP00122      146      1
>DP00122      147      1
>DP00122      148      1
>DP00122      149      1
>DP00122      150      1
>DP00122      151      1
>DP00122      152      1
>DP00122      153      1
>DP00122      154      1
>DP00122      155      1
>DP00122      156      1
>DP00122      157      1
>DP00122      158      1
>DP00122      159      1
>DP00122      160      1
>DP00122      161      1
>DP00122      162      1
>DP00122      163      1
>DP00122      164      1
>DP00122      165      1
>DP00122      166      1
>DP00122      167      1
>DP00122      168      1
>DP00122      169      1
>DP00122      170      1
>DP00122      171      1
>DP00122      172      1
>DP00122      173      1
>DP00122      174      1
>DP00122      175      1
>DP00122      176      1
>DP00122      177      1
>DP00122      178      1
>DP00122      179      1
>DP00122      180      1
>DP00122      181      1
>DP00122      182      1
>DP00122      183      1
>DP00122      184      1
>DP00122      185      1
>DP00122      186      1
>DP00122      187      1
>DP00122      188      1
>DP00122      189      1
>DP00122      190      1
>DP00122      191      1
>DP00122      192      1
>DP00122      193      1
>DP00122      194      1
>DP00122      195      1
>DP00122      196      1
>DP00122      197      1
>DP00122      198      1
>DP00122      199      1
>DP00122      200      1
>DP00122      201      1
>DP00122      202      1
>DP00122      203      1
>DP00122      204      1
>DP00122      205      1
>DP00122      206      1
>DP00122      207      1
>DP00122      208      1
>DP00122      209      1
>DP00122      210      1
>DP00122      211      1
>DP00122      212      1
>DP00122      213      1
>DP00122      214      1
>DP00122      215      1
>DP00122      216      1
>DP00122      217      1
>DP00122      218      1
>DP00122      219      1
>DP00122      220      1
>DP00122      221      1
>DP00122      222      1
>DP00122      223      1
>DP00122      224      1
>DP00122      225      1
>DP00122      226      1
>DP00122      227      1
>DP00122      228      1
>DP00122      229      1
>DP00122      230      1
>DP00122      231      1
>DP00122      232      1
>DP00122      233      1
>DP00122      234      1
>DP00122      235      1
>DP00122      236      1
>DP00122      237      1
>DP00122      238      1
>DP00122      239      1
>DP00122      240      1
>DP00122      241      1
>DP00122      242      1
>DP00122      243      1
>DP00122      244      1
>DP00122      245      1
>DP00122      246      1
>DP00122      247      1
>DP00122      248      1
>DP00122      249      1
>DP00122      250      1
>DP00122      251      1
>DP00122      252      1
>DP00122      253      1
>DP00122      254      1
>DP00122      255      1
>DP00122      256      1
>DP00122      257      1
>DP00122      258      1
>DP00122      259      1
>DP00122      260      1
>DP00122      261      1
>DP00122      262      1
>DP00122      263      1
>DP00122      264      1
>DP00122      265      1
>DP00122      266      1
>DP00122      267      1
>DP00122      268      1
>DP00122      269      1
>DP00122      270      1
>DP00122      271      1
>DP00122      272      1
>DP00122      273      1
>DP00122      274      1
>DP00122      275      1
>DP00122      276      1
>DP00122      277      1
>DP00122      278      1
>DP00122      279      1
>DP00122      280      1
>DP00122      281      1
>DP00122      282      1
>DP00122      283      1
>DP00122      284      1
>DP00122      285      1
>DP00122      286      1
>DP00122      287      1
>DP00122      288      1
>DP00122      289      1
>DP00122      290      1
>DP00122      291      1
>DP00122      292      1
>DP00122      293      1
>DP00122      294      1
>DP00122      295      1
>DP00122      296      1
>DP00122      297      1
>DP00122      298      1
>DP00122      299      1
>DP00122      300      1
>DP00122      301      1
>DP00122      302      1
>DP00122      303      1
>DP00122      304      1
>DP00122      305      1
>DP00122      306      1
>DP00122      307      1
>DP00122      308      1
>DP00122      309      1
>DP00122      310      1
>DP00122      311      1
>DP00122      312      1
>DP00122      313      1
>DP00122      314      1
>DP00122      315      1
>DP00122      316      1
>DP00122      317      1
>DP00122      318      1
>DP00122      319      1
>DP00122      320      1
>DP00122      321      1
>DP00122      322      1
>DP00122      323      1
>DP00122      324      1
>DP00122      325      1
>DP00122      326      1
>DP00122      327      1
>DP00122      328      1
>DP00122      329      1
>DP00122      330      1
>DP00122      331      1
>DP00122      332      1
>DP00122      333      1
>DP00122      334      1
>DP00122      335      1
>DP00122      336      1
>DP00122      337      1
>DP00122      338      1
>DP00122      339      1
>DP00122      340      1
>DP00122      341      1
>DP00122      342      1
>DP00122      343      1
>DP00122      344      1
>DP00122      345      1
>DP00122      346      1
>DP00122      347      1
>DP00122      348      1
>DP00122      349      1
>DP00122      350      1
>DP00122      351      1
>DP00122      352      1
>DP00122      353      1
>DP00122      354      1
>DP00122      355      1
>DP00122      356      1
>DP00122      357      1
>DP00122      358      1
>DP00122      359      1
>DP00122      360      1
>DP00122      361      1
>DP00122      362      1
>DP00122      363      1
>DP00122      364      1
>DP00122      365      1
>DP00122      366      1
>DP00122      367      1
>DP00122      368      1
>DP00122      369      1
>DP00122      370      1
>DP00122      371      1
>DP00122      372      1
>DP00122      373      1
>DP00122      374      1
>DP00122      375      1
>DP00122      376      1
>DP00122      377      1
>DP00122      378      1
>DP00122      379      1
>DP00122      380      1
>DP00122      381      1
>DP00122      382      1
>DP00122      383      1
>DP00122      384      1
>DP00122      385      1
>DP00122      386      1
>DP00122      387      1
>DP00122      388      1
>DP00122      389      1
>DP00122      390      1
>DP00122      391      1
>DP00122      392      1
>DP00122      393      1
>DP00122      394      1
>DP00122      395      1
>DP00122      396      1
>DP00122      397      1
>DP00122      398      1
>DP00122      399      1
>DP00122      400      1
>DP00122      401      1
>DP00122      402      1
>DP00122      403      1
>DP00122      404      1
>DP00122      405      1
>DP00122      406      1
>DP00122      407      1
>DP00122      408      1
>DP00122      409      1
>DP00122      410      1
>DP00122      411      1
>DP00122      412      1
>DP00122      413      1
>DP00122      414      1
>DP00122      415      1
>DP00122      416      1
>DP00122      417      1
>DP00122      418      1
>DP00122      419      1
>DP00122      420      1
>DP00122      421      1
>DP00122      422      1
>DP00122      423      1
>DP00122      424      1
>DP00122      425      1
>DP00122      426      1
>DP00122      427      1
>DP00122      428      1
>DP00122      429      1
>DP00122      430      1
>DP00122      431      1
>DP00122      432      1
>DP00122      433      1
>DP00122      434      1
>DP00122      435      1
>DP00122      436      1
>DP00122      437      1
>DP00122      438      1
>DP00122      439      1
>DP00122      440      1
>DP00122      441      1
>DP00122      442      1
>DP00122      443      1
>DP00122      444      1
>DP00122      445      1
>DP00122      446      1
>DP00122      447      1
>DP00122      448      1
>DP00122      449      1
>DP00122      450      1
>DP00122      451      1
>DP00122      452      1
>DP00122      453      1
>DP00122      454      1
>DP00122      455      1
>DP00122      456      1
>DP00122      457      1
>DP00122      458      1
>DP00122      459      1
>DP00122      460      1
>DP00122      461      1
>DP00122      462      1
>DP00122      463      1
>DP00122      464      1
>DP00122      465      1
>DP00122      466      1
>DP00122      467      1
>DP00122      468      1
>DP00122      469      1
>DP00122      470      1
>DP00122      471      1
>DP00122      472      1
>DP00122      473      1
>DP00122      474      1
>DP00122      475      1
>DP00122      476      1
>DP00122      477      1
>DP00122      478      1
>DP00122      479      1
>DP00122      480      1
>DP00122      481      1
>DP00122      482      1
>DP00122      483      1
>DP00122      484      1
>DP00122      485      1
>DP00122      486      1
>DP00122      487      1
>DP00122      488      1
>DP00122      489      1
>DP00122      490      1
>DP00122      491      1
>DP00122      492      1
>DP00122      493      1
>DP00122      494      1
>DP00122      495      1
>DP00122      496      1
>DP00122      497      1
>DP00122      498      1
>DP00122      499      1
>DP00122      500      1
>DP00122      501      1
>DP00122      502      1
>DP00122      503      1
>DP00122      504      1
>DP00122      505      1
>DP00122      506      1
>DP00122      507      1
>DP00122      508      1
>DP00122      509      1
>DP00122      510      1
>DP00122      511      1
>DP00122      512      1
>DP00122      513      1
>DP00122      514      1
>DP00122      515      1
>DP00122      516      1
>DP00122      517      1
>DP00122      518      1
>DP00122      519      1
>DP00122      520      1
>DP00122      521      1
>DP00122      522      1
>DP00122      523      1
>DP00122      524      1
>DP00122      525      1
>DP00122      526      1
>DP00122      527      1
>DP00122      528      1
>DP00122      529      1
>DP00122      530      1
>DP00122      531      1
>DP00122      532      1
>DP00122      533      1
>DP00122      534      1
>DP00122      535      1
>DP00122      536      1
>DP00122      537      1
>DP00122      538      1
>DP00122      539      1
>DP00122      540      1
>DP00122      541      1
>DP00122      542      1
>DP00122      543      1
>DP00122      544      1
>DP00122      545      1
>DP00122      546      1
>DP00122      547      1
>DP00122      548      1
>DP00122      549      1
>DP00122      550      1
>DP00122      551      1
>DP00122      552      1
>DP00122      553      1
>DP00122      554      1
>DP00122      555      1
>DP00122      556      1
>DP00122      557      1
>DP00122      558      1
>DP00122      559      1
>DP00122      560      1
>DP00122      561      1
>DP00122      562      1
>DP00122      563      1
>DP00122      564      1
>DP00122      565      1
>DP00122      566      1
>DP00122      567      1
>DP00122      568      1
>DP00122      569      1
>DP00122      570      1
>DP00122      571      1
>DP00122      572      1
>DP00122      573      1
>DP00122      574      1
>DP00122      575      1
>DP00122      576      1
>DP00122      577      1
>DP00122      578      1
>DP00122      579      1
>DP00122      580      1
>DP00122      581      1
>DP00122      582      1
>DP00122      583      1
>DP00122      584      1
>DP00122      585      1
>DP00122      586      1
>DP00122      587      1
>DP00122      588      1
>DP00122      589      1
>DP00122      590      1
>DP00122      591      1
>DP00122      592      1
>DP00122      593      1
>DP00122      594      1
>DP00122      595      1
>DP00122      596      1
>DP00122      597      1
>DP00122      598      1
>DP00122      599      1
>DP00122      600      1
>DP00122      601      1
>DP00122      602      1
>DP00122      603      1
>DP00122      604      1
>DP00122      605      1
>DP00122      606      1
>DP00122      607      1
>DP00122      608      1
>DP00122      609      1
>DP00122      610      1
>DP00122      611      1
>DP00122      612      1
>DP00122      613      1
>DP00122      614      1
>DP00122      615      1
>DP00122      616      1
>DP00122      617      1
>DP00122      618      1
>DP00122      619      1
>DP00122      620      1
>DP00122      621      1
>DP00122      622      1
>DP00122      623      1
>DP00122      624      1
>DP00122      625      1
>DP00122      626      1
>DP00122      627      1
>DP00122      628      1
>DP00122      629      1
>DP00122      630      1
>DP00122      631      1
>DP00122      632      1
>DP00122      633      1
>DP00122      634      1
>DP00122      635      1
>DP00122      636      1
>DP00122      637      1
>DP00122      638      1
>DP00122      639      1
>DP00122      640      1
>DP00122      641      1
>DP00122      642      1
>DP00122      643      1
>DP00122      644      1
>DP00122      645      1
>DP00122      646      1
>DP00122      647      1
>DP00122      648      1
>DP00122      649      1
>DP00122      650      1
>DP00122      651      1
>DP00122      652      1
>DP00122      653      1
>DP00122      654      1
>DP00122      655      1
>DP00122      656      1
>DP00122      657      1
>DP00122      658      1
>DP00122      659      1
>DP00122      660      1
>DP00122      661      1
>DP00122      662      1
>DP00122      663      1
>DP00122      664      1
>DP00122      665      1
>DP00122      666      1
>DP00122      667      1
>DP00122      668      1
>DP00122      669      1
>DP00122      670      1
>DP00122      671      1
>DP00122      672      1
>DP00122      673      1
>DP00122      674      1
>DP00122      675      1
>DP00122      676      1
>DP00122      677      1
>DP00122      678      1
>DP00122      679      1
>DP00122      680      1
>DP00122      681      1
>DP00122      682      1
>DP00122      683      1
>DP00122      684      1
>DP00122      685      1
>DP00122      686      1
>DP00122      687      1
>DP00122      688      1
>DP00122      689      1
>DP00122      690      1
>DP00122      691      1
>DP00122      692      1
>DP00122      693      1
>DP00122      694      1
>DP00122      695      1
>DP00122      696      1
>DP00122      697      1
>DP00122      698      1
>DP00122      699      1
>DP00122      700      1
>DP00122      701      1
>DP00122      702      1
>DP00122      703      1
>DP00122      704      1
>DP00122      705      1
>DP00122      706      1
>DP00122      707      1
>DP00122      708      1
>DP00122      709      1
>DP00122      710      1
>DP00122      711      1
>DP00122      712      1
>DP00122      713      1
>DP00122      714      1
>DP00122      715      1
>DP00122      716      1
>DP00122      717      1
>DP00122      718      1
>DP00122      719      1
>DP00122      720      1
>DP00122      721      1
>DP00122      722      1
>DP00122      723      1
>DP00122      724      1
>DP00122      725      1
>DP00122      726      1
>DP00122      727      1
>DP00122      728      1
>DP00122      729      1
>DP00122      730      1
>DP00122      731      1
>DP00122      732      1
>DP00122      733      1
>DP00122      734      1
>DP00122      735      1
>DP00122      736      1
>DP00122      737      1
>DP00122      738      1
>DP00122      739      1
>DP00122      740      1
>DP00122      741      1
>DP00122      742      1
>DP00122      743      1
>DP00122      744      1
>DP00122      745      1
>DP00122      746      1
>DP00122      747      1
>DP00122      748      1
>DP00122      749      1
>DP00122      750      1
>DP00122      751      1
>DP00122      752      1
>DP00122      753      1
>DP00122      754      1
>DP00122      755      1
>DP00122      756      1
>DP00122      757      1
>DP00122      758      1
>DP00122      759      1
>DP00122      760      1
>DP00122      761      1
>DP00122      762      1
>DP00122      763      1
>DP00122      764      1
>DP00122      765      1
>DP00122      766      1
>DP00122      767      1
>DP00122      768      1
>DP00122      769      1
>DP00122      770      1
>DP00122      771      1
>DP00122      772      1
>DP00122      773      1
>DP00122      774      1
>DP00122      775      1
>DP00122      776      1
>DP00122      777      1
>DP00122      778      1
>DP00122      779      1
>DP00122      780      1
>DP00122      781      1
>DP00122      782      1
>DP00122      783      1
>DP00122      784      1
>DP00122      785      1
>DP00122      786      1
>DP00122      787      1
>DP00122      788      1
>DP00122      789      1
>DP00122      790      1
>DP00122      791      1
>DP00122      792      1
>DP00122      793      1
>DP00122      794      1
>DP00122      795      1
>DP00122      796      1
>DP00122      797      1
>DP00122      798      1
>DP00122      799      1
>DP00122      800      1
>DP00122      801      1
>DP00122      802      1
>DP00122      803      1
>DP00122      804      1
>DP00122      805      1
>DP00122      806      1
>DP00122      807      1
>DP00122      808      1
>DP00122      809      1
>DP00122      810      1
>DP00122      811      1
>DP00122      812      1
>DP00122      813      1
>DP00122      814      1
>DP00122      815      1
>DP00122      816      1
>DP00122      817      1
>DP00122      818      1
>DP00122      819      1
>DP00122      820      1
>DP00122      821      1
>DP00122      822      1
>DP00122      823      1
>DP00122      824      1
>DP00122      825      1
>DP00122      826      1
>DP00122      827      1
>DP00122      828      1
>DP00122      829      1
>DP00122      830      1
>DP00122      831      1
>DP00122      832      1
>DP00122      833      1
>DP00122      834      1
>DP00122      835      1
>DP00122      836      1
>DP00122      837      1
>DP00122      838      1
>DP00122      839      1
>DP00122      840      1
>DP00122      841      1
>DP00122      842      1
>DP00122      843      1
>DP00122      844      1
>DP00122      845      1
>DP00122      846      1
>DP00122      847      1
>DP00122      848      1
>DP00122      849      1
>DP00122      850      1
>DP00122      851      1
>DP00122      852      1
>DP00122      853      1
>DP00122      854      1
>DP00122      855      1
>DP00122      856      1
>DP00122      857      1
>DP00122      858      1
>DP00122      859      1
>DP00122      860      1
>DP00122      861      1
>DP00122      862      1
>DP00122      863      1
>DP00122      864      1
>DP00122      865      1
>DP00122      866      1
>DP00122      867      1
>DP00122      868      1
>DP00122      869      1
>DP00122      870      1
>DP00122      871      1
>DP00122      872      1
>DP00122      873      1
>DP00122      874      1
>DP00122      875      1
>DP00122      876      1
>DP00122      877      1
>DP00122      878      1
>DP00122      879      1
>DP00122      880      1
>DP00122      881      1
>DP00122      882      1
>DP00122      883      1
>DP00122      884      1
>DP00122      885      1
>DP00122      886      1
>DP00122      887      1
>DP00122      888      1
>DP00122      889      1
>DP00122      890      1
>DP00122      891      1
>DP00122      892      1
>DP00122      893      1
>DP00122      894      1
>DP00122      895      1
>DP00122      896      1
>DP00122      897      1
>DP00122      898      1
>DP00122      899      1
>DP00122      900      1
>DP00122      901      1
>DP00122      902      1
>DP00122      903      1
>DP00122      904      1
>DP00122      905      1
>DP00122      906      1
>DP00122      907      1
>DP00122      908      1
>DP00122      909      1
>DP00122      910      1
>DP00122      911      1
>DP00122      912      1
>DP00122      913      1
>DP00122      914      1
>DP00122      915      1
>DP00122      916      1
>DP00122      917      1
>DP00122      918      1
>DP00122      919      1
>DP00122      920      1
>DP00122      921      1
>DP00122      922      1
>DP00122      923      1
>DP00122      924      1
>DP00122      925      1
>DP00122      926      1
>DP00122      927      1
>DP00122      928      1
>DP00122      929      1
>DP00122      930      1
>DP00122      931      1
>DP00122      932      1
>DP00122      933      1
>DP00122      934      1
>DP00122      935      1
>DP00122      936      1
>DP00122      937      1
>DP00122      938      1
>DP00122      939      1
>DP00122      940      1
>DP00122      941      1
>DP00122      942      1
>DP00122      943      1
>DP00122      944      1
>DP00122      945      1
>DP00122      946      1
>DP00122      947      1
>DP00122      948      1
>DP00122      949      1
>DP00122      950      1
>DP00122      951      1
>DP00122      952      1
>DP00122      953      1
>DP00122      954      1
>DP00122      955      1
>DP00122      956      1
>DP00122      957      1
>DP00122      958      1
>DP00122      959      1
>DP00122      960      1
>DP00122      961      1
>DP00122      962      1
>DP00122      963      1
>DP00122      964      1
>DP00122      965      1
>DP00122      966      1
>DP00122      967      1
>DP00122      968      1
>DP00122      969      1
>DP00122      970      1
>DP00122      971      1
>DP00122      972      1
>DP00122      973      1
>DP00122      974      1
>DP00122      975      1
>DP00122      976      1
>DP00122      977      1
>DP00122      978      1
>DP00122      979      1
>DP00122      980      1
>DP00122      981      1
>DP00122      982      1
>DP00122      983      1
>DP00122      984      1
>DP00122      985      1
>DP00122      986      1
>DP00122      987      1
>DP00122      988      1
>DP00122      989      1
>DP00122      990      1
>DP00122      991      1
>DP00122      992      1
>DP00122      993      1
>DP00122      994      1
>DP00122      995      1
>DP00122      996      1
>DP00122      997      1
>DP00122      998      1
>DP00122      999      1
>DP00122      1000      1
>DP00122      1001      1
>DP00122      1002      1
>DP00122      1003      1
>DP00122      1004      1
>DP00122      1005      1
>DP00122      1006      1
>DP00122      1007      1
>DP00122      1008      1
>DP00122      1009      1
>DP00122      1010      1
>DP00122      1011      1
>DP00122      1012      1
>DP00122      1013      1
>DP00122      1014      1
>DP00122      1015      1
>DP00122      1016      1
>DP00122      1017      1
>DP00122      1018      1
>DP00122      1019      1
>DP00122      1020      1
>DP00122      1021      1
>DP00122      1022      1
>DP00122      1023      1
>DP00122      1024      1
>DP00122      1025      1
>DP00122      1026      1
>DP00122      1027      1
>DP00122      1028      1
>DP00122      1029      1
>DP00122      1030      1
>DP00122      1031      1
>DP00122      1032      1
>DP00122      1033      1
>DP00122      1034      1
>DP00122      1035      1
>DP00122      1036      1
>DP00122      1037      1
>DP00122      1038      1
>DP00122      1039      1
>DP00122      1040      1
>DP00122      1041      1
>DP00122      1042      1
>DP00122      1043      1
>DP00122      1044      1
>DP00122      1045      1
>DP00122      1046      1
>DP00122      1047      1
>DP00122      1048      1
>DP00122      1049      1
>DP00122      1050      1
>DP00122      1051      1
>DP00122      1052      1
>DP00122      1053      1
>DP00122      1054      1
>DP00122      1055      1
>DP00122      1056      1
>DP00122      1057      1
>DP00122      1058      1
>DP00122      1059      1
>DP00122      1060      1
>DP00122      1061      1
>DP00122      1062      1
>DP00122      1063      1
>DP00122      1064      1
>DP00122      1065      1
>DP00122      1066      1
>DP00122      1067      1
>DP00122      1068      1
>DP00122      1069      1
>DP00122      1070      1
>DP00122      1071      1
>DP00122      1072      1
>DP00122      1073      1
>DP00122      1074      1
>DP00122      1075      1
>DP00122      1076      1
>DP00122      1077      1
>DP00122      1078      1
>DP00122      1079      1
>DP00122      1080      1
>DP00122      1081      1
>DP00122      1082      1
>DP00122      1083      1
>DP00122      1084      1
>DP00122      1085      1
>DP00122      1086      1
>DP00122      1087      1
>DP00122      1088      1
>DP00122      1089      1
>DP00122      1090      1
>DP00122      1091      1
>DP00122      1092      1
>DP00122      1093      1
>DP00122      1094      1
>DP00122      1095      1
>DP00122      1096      1
>DP00122      1097      1
>DP00122      1098      1
>DP00122      1099      1
>DP00122      1100      1
>DP00122      1101      1
>DP00122      1102      1
>DP00122      1103      1
>DP00122      1104      1
>DP00122      1105      1
>DP00122      1106      1
>DP00122      1107      1
>DP00122      1108      1
>DP00122      1109      1
>DP00122      1110      1
>DP00122      1111      1
>DP00122      1112      1
>DP00122      1113      1
>DP00122      1114      1
>DP00122      1115      1
>DP00122      1116      1
>DP00122      1117      1
>DP00122      1118      1
>DP00122      1119      1
>DP00122      1120      1
>DP00122      1121      1
>DP00122      1122      1
>DP00122      1123      1
>DP00122      1124      1
>DP00122      1125      1
>DP00122      1126      1
>DP00122      1127      1
>DP00122      1128      1
>DP00122      1129      1
>DP00122      1130      1
>DP00122      1131      1
>DP00122      1132      1
>DP00122      1133      1
>DP00122      1134      1
>DP00122      1135      1
>DP00122      1136      1
>DP00122      1137      1
>DP00122      1138      1
>DP00122      1139      1
>DP00122      1140      1
>DP00122      1141      1
>DP00122      1142      1
>DP00122      1143      1
>DP00122      1144      1
>DP00122      1145      1
>DP00122      1146      1
>DP00122      1147      1
>DP00122      1148      1
>DP00122      1149      1
>DP00122      1150      1
>DP00122      1151      1
>DP00122      1152      1
>DP00122      1153      1
>DP00122      1154      1
>DP00122      1155      1
>DP00122      1156      1
>DP00122      1157      1
>DP00122      1158      1
>DP00122      1159      1
>DP00122      1160      1
>DP00122      1161      1
>DP00122      1162      1
>DP00122      1163      1
>DP00122      1164      1
>DP00122      1165      1
>DP00122      1166      1
>DP00122      1167      1
>DP00122      1168      1
>DP00122      1169      1
>DP00122      1170      1
>DP00122      1171      1
>DP00122      1172      1
>DP00122      1173      1
>DP00122      1174      1
>DP00122      1175      1
>DP00122      1176      1
>DP00122      1177      1
>DP00122      1178      1
>DP00122      1179      1
>DP00122      1180      1
>DP00122      1181      1
>DP00122      1182      1
>DP00122      1183      1
>DP00122      1184      1
>DP00122      1185      1
>DP00122      1186      1
>DP00122      1187      1
>DP00122      1188      1
>DP00122      1189      1
>DP00122      1190      1
>DP00122      1191      1
>DP00122      1192      1
>DP00122      1193      1
>DP00122      1194      1
>DP00122      1195      1
>DP00122      1196      1
>DP00122      1197      1
>DP00122      1198      1
>DP00122      1199      1
>DP00122      1200      1
>DP00122      1201      1
>DP00122      1202      1
>DP00122      1203      1
>DP00122      1204      1
>DP00122      1205      1
>DP00122      1206      1
>DP00122      1207      1
>DP00122      1208      1
>DP00122      1209      1
>DP00122      1210      1
>DP00122      1211      1
>DP00122      1212      1
>DP00122      1213      1
>DP00122      1214      1
>DP00122      1215      1
>DP00122      1216      1
>DP00122      1217      1
>DP00122      1218      1
>DP00122      1219      1
>DP00122      1220      1
>DP00122      1221      1
>DP00122      1222      1
>DP00122      1223      1
>DP00122      1224      1
>DP00122      1225      1
>DP00122      1226      1
>DP00122      1227      1
>DP00122      1228      1
>DP00122      1229      1
>DP00122      1230      1
>DP00122      1231      1
>DP00122      1232      1
>DP00122      1233      1
>DP00122      1234      1
>DP00122      1235      1
>DP00122      1236      1
>DP00122      1237      1
>DP00122      1238      1
>DP00122      1239      1
>DP00122      1240      1
>DP00122      1241      1
>DP00122      1242      1
>DP00122      1243      1
>DP00122      1244      1
>DP00122      1245      1
>DP00122      1246      1
>DP00122      1247      1
>DP00122      1248      1
>DP00122      1249      1
>DP00122      1250      1
>DP00122      1251      1
>DP00122      1252      1
>DP00122      1253      1
>DP00122      1254      1
>DP00122      1255      1
>DP00122      1256      1
>DP00122      1257      1
>DP00122      1258      1
>DP00122      1259      1
>DP00122      1260      1
>DP00122      1261      1
>DP00122      1262      1
>DP00122      1263      1
>DP00122      1264      1
>DP00122      1265      1
>DP00122      1266      1
>DP00122      1267      1
>DP00122      1268      1
>DP00122      1269      1
>DP00122      1270      1
>DP00122      1271      1
>DP00122      1272      1
>DP00122      1273      1
>DP00122      1274      1
>DP00122      1275      1
>DP00122      1276      1
>DP00122      1277      1
>DP00122      1278      1
>DP00122      1279      1
>DP00122      1280      1
>DP00122      1281      1
>DP00122      1282      1
>DP00122      1283      1
>DP00122      1284      1
>DP00122      1285      1
>DP00122      1286      1
>DP00122      1287      1
>DP00122      1288      1
>DP00122      1289      1
>DP00122      1290      1
>DP00122      1291      1
>DP00122      1292      1
>DP00122      1293      1
>DP00122      1294      1
>DP00122      1295      1
>DP00122      1296      1
>DP00122      1297      1
>DP00122      1298      1
>DP00122      1299      1
>DP00122      1300      1
>DP00122      1301      1
>DP00122      1302      1
>DP00122      1303      1
>DP00122      1304      1
>DP00122      1305      1
>DP00122      1306      1
>DP00122      1307      1
>DP00122      1308      1
>DP00122      1309      1
>DP00122      1310      1
>DP00122      1311      1
>DP00122      1312      1
>DP00122      1313      1
>DP00122      1314      1
>DP00122      1315      1
>DP00122      1316      1
>DP00122      1317      1
>DP00122      1318      1
>DP00122      1319      1
>DP00122      1320      1
>DP00122      1321      1
>DP00122      1322      1
>DP00122      1323      1
>DP00122      1324      1
>DP00122      1325      1
>DP00122      1326      1
>DP00122      1327      1
>DP00122      1328      1
>DP00122      1329      1
>DP00122      1330      1
>DP00122      1331      1
>DP00122      1332      1
>DP00122      1333      1
>DP00122      1334      1
>DP00122      1335      1
>DP00122      1336      1
>DP00122      1337      1
>DP00122      1338      1
>DP00122      1339      1
>DP00122      1340      1
>DP00122      1341      1
>DP00122      1342      1
>DP00122      1343      1
>DP00122      1344      1
>DP00122      1345      1
>DP00122      1346      1
>DP00122      1347      1
>DP00122      1348      1
>DP00122      1349      1
>DP00122      1350      1
>DP00122      1351      1
>DP00122      1352      1
>DP00122      1353      1
>DP00122      1354      1
>DP00122      1355      1
>DP00122      1356      1
>DP00122      1357      1
>DP00122      1358      1
>DP00122      1359      1
>DP00122      1360      1
>DP00122      1361      1
>DP00122      1362      1
>DP00122      1363      1
>DP00122      1364      1
>DP00122      1365      1
>DP00122      1366      1
>DP00122      1367      1
>DP00122      1368      1
>DP00122      1369      1
>DP00122      1370      1
>DP00122      1371      1
>DP00122      1372      1
>DP00122      1373      1
>DP00122      1374      1
>DP00122      1375      1
>DP00122      1376      1
>DP00122      1377      1
>DP00122      1378      1
>DP00122      1379      1
>DP00122      1380      1
>DP00122      1381      1
>DP00122      1382      1
>DP00122      1383      1
>DP00122      1384      1
>DP00122      1385      1
>DP00122      1386      1
>DP00122      1387      1
>DP00122      1388      1
>DP00122      1389      1
>DP00122      1390      1
>DP00122      1391      1
>DP00122      1392      1
>DP00122      1393      1
>DP00122      1394      1
>DP00122      1395      1
>DP00122      1396      1
>DP00122      1397      1
>DP00122      1398      1
>DP00122      1399      1
>DP00122      1400      1
>DP00122      1401      1
>DP00122      1402      1
>DP00122      1403      1
>DP00122      1404      1
>DP00122      1405      1
>DP00122      1406      1
>DP00122      1407      1
>DP00122      1408      1
>DP00122      1409      1
>DP00122      1410      1
>DP00122      1411      1
>DP00122      1412      1
>DP00122      1413      1
>DP00122      1414      1
>DP00122      1415      1
>DP00122      1416      1
>DP00122      1417      1
>DP00122      1418      1
>DP00122      1419      1
>DP00122      1420      1
>DP00122      1421      1
>DP00122      1422      1
>DP00122      1423      1
>DP00122      1424      1
>DP00122      1425      1
>DP00122      1426      1
>DP00122      1427      1
>DP00122      1428      1
>DP00122      1429      1
>DP00122      1430      1
>DP00122      1431      1
>DP00122      1432      1
>DP00122      1433      1
>DP00122      1434      1
>DP00122      1435      1
>DP00122      1436      1
>DP00122      1437      1
>DP00122      1438      1
>DP00122      1439      1
>DP00122      1440      1
>DP00122      1441      1
>DP00122      1442      1
>DP00122      1443      1
>DP00122      1444      1
>DP00122      1445      1
>DP00122      1446      1
>DP00122      1447      1
>DP00122      1448      1
>DP00122      1449      1
>DP00122      1450      1
>DP00122      1451      1
>DP00122      1452      1
>DP00122      1453      1
>DP00122      1454      1
>DP00122      1455      1
>DP00122      1456      1
>DP00122      1457      1
>DP00122      1458      1
>DP00122      1459      1
>DP00122      1460      1
>DP00122      1461      1
>DP00122      1462      1
>DP00122      1463      1
>DP00122      1464      1
>DP00122      1465      1
>DP00122      1466      1
>DP00122      1467      1
>DP00122      1468      1
>DP00122      1469      1
>DP00122      1470      1
>DP00122      1471      1
>DP00122      1472      1
>DP00122      1473      1
>DP00122      1474      1
>DP00122      1475      1
>DP00122      1476      1
>DP00122      1477      1
>DP00122      1478      1
>DP00122      1479      1
>DP00122      1480      1
>DP00122      1481      1
>DP00122      1482      1
>DP00122      1483      1
>DP00122      1484      1
>DP00122      1485      1
>DP00122      1486      1
>DP00122      1487      1
>DP00122      1488      1
>DP00122      1489      1
>DP00122      1490      1
>DP00122      1491      1
>DP00122      1492      1
>DP00122      1493      1
>DP00122      1494      1
>DP00122      1495      1
>DP00122      1496      1
>DP00122      1497      1
>DP00122      1498      1
>DP00122      1499      1
>DP00122      1500      1
>DP00122      1501      1
>DP00122      1502      1
>DP00122      1503      1
>DP00122      1504      1
>DP00122      1505      1
>DP00122      1506      1
>DP00122      1507      1
>DP00122      1508      1
>DP00122      1509      1
>DP00122      1510      1
>DP00122      1511      1
>DP00122      1512      1
>DP00122      1513      1
>DP00122      1514      1
>DP00122      1515      1
>DP00122      1516      1
>DP00122      1517      1
>DP00122      1518      1
>DP00122      1519      1
>DP00122      1520      1
>DP00122      1521      1
>DP00122      1522      1
>DP00122      1523      1
>DP00122      1524      1
>DP00122      1525      1
>DP00122      1526      1
>DP00122      1527      1
>DP00122      1528      1
>DP00122      1529      1
>DP00122      1530      1
>DP00122      1531      1
>DP00122      1532      1
>DP00122      1533      1
>DP00122      1534      1
>DP00122      1535      1
>DP00122      1536      1
>DP00122      1537      1
>DP00122      1538      1
>DP00122      1539      1
>DP00122      1540      1
>DP00122      1541      1
>DP00122      1542      1
>DP00122      1543      1
>DP00122      1544      1
>DP00122      1545      1
>DP00122      1546      1
>DP00122      1547      1
>DP00122      1548      1
>DP00122      1549      1
>DP00122      1550      1
>DP00122      1551      1
>DP00122      1552      1
>DP00122      1553      1
>DP00122      1554      1
>DP00122      1555      1
>DP00122      1556      1
>DP00122      1557      1
>DP00122      1558      1
>DP00122      1559      1
>DP00122      1560      1
>DP00122      1561      1
>DP00122      1562      1
>DP00122      1563      1
>DP00122      1564      1
>DP00122      1565      1
>DP00122      1566      1
>DP00122      1567      1
>DP00122      1568      1
>DP00122      1569      1
>DP00122      1570      1
>DP00122      1571      1
>DP00122      1572      1
>DP00122      1573      1
>DP00122      1574      1
>DP00122      1575      1
>DP00122      1576      1
>DP00122      1577      1
>DP00122      1578      1
>DP00122      1579      1
>DP00122      1580      1
>DP00122      1581      1
>DP00122      1582      1
>DP00122      1583      1
>DP00122      1584      1
>DP00122      1585      1
>DP00122      1586      1
>DP00122      1587      1
>DP00122      1588      1
>DP00122      1589      1
>DP00122      1590      1
>DP00122      1591      1
>DP00122      1592      1
>DP00122      1593      1
>DP00122      1594      1
>DP00122      1595      1
>DP00122      1596      1
>DP00122      1597      1
>DP00122      1598      1
>DP00122      1599      1
>DP00122      1600      1
>DP00122      1601      1
>DP00122      1602      1
>DP00122      1603      1
>DP00122      1604      1
>DP00122      1605      1
>DP00122      1606      1
>DP00122      1607      1
>DP00122      1608      1
>DP00122      1609      1
>DP00122      1610      1
>DP00122      1611      1
>DP00122      1612      1
>DP00122      1613      1
>DP00122      1614      1
>DP00122      1615      1
>DP00122      1616      1
>DP00122      1617      1
>DP00122      1618      1
>DP00122      1619      1
>DP00122      1620      1
>DP00122      1621      1
>DP00122      1622      1
>DP00122      1623      1
>DP00122      1624      1
>DP00122      1625      1
>DP00122      1626      1
>DP00122      1627      1
>DP00122      1628      1
>DP00122      1629      1
>DP00122      1630      1
>DP00122      1631      1
>DP00122      1632      1
>DP00122      1633      1
>DP00122      1634      1
>DP00122      1635      1
>DP00122      1636      1
>DP00122      1637      1
>DP00122      1638      1
>DP00122      1639      1
>DP00122      1640      1
>DP00122      1641      1
>DP00122      1642      1
>DP00122      1643      1
>DP00122      1644      1
>DP00122      1645      1
>DP00122      1646      1
>DP00122      1647      1
>DP00122      1648      1
>DP00122      1649      1
>DP00122      1650      1
>DP00122      1651      1
>DP00122      1652      1
>DP00122      1653      1
>DP00122      1654      1
>DP00122      1655      1
>DP00122      1656      1
>DP00122      1657      1
>DP00122      1658      1
>DP00122      1659      1
>DP00122      1660      1
>DP00122      1661      1
>DP00122      1662      1
>DP00122      1663      1
>DP00122      1664      1
>DP00122      1665      1
>DP00122      1666      1
>DP00122      1667      1
>DP00122      1668      1
>DP00122      1669      1
>DP00122      1670      1
>DP00122      1671      1
>DP00122      1672      1
>DP00122      1673      1
>DP00122      1674      1
>DP00122      1675      1
>DP00122      1676      1
>DP00122      1677      1
>DP00122      1678      1
>DP00122      1679      1
>DP00122      1680      1
>DP00122      1681      1
>DP00122      1682      1
>DP00122      1683      1
>DP00122      1684      1
>DP00122      1685      1
>DP00122      1686      1
>DP00122      1687      1
>DP00122      1688      1
>DP00122      1689      1
>DP00122      1690      1
>DP00122      1691      1
>DP00122      1692      1
>DP00122      1693      1
>DP00122      1694      1
>DP00122      1695      1
>DP00122      1696      1
>DP00122      1697      1
>DP00122      1698      1
>DP00122      1699      1
>DP00122      1700      1
>DP00122      1701      1
>DP00122      1702      1
>DP00122      1703      1
>DP00122      1704      1
>DP00122      1705      1
>DP00122      1706      1
>DP00122      1707      1
>DP00122      1708      1
>DP00122      1709      1
>DP00122      1710      1
>DP00122      1711      1
>DP00122      1712      1
>DP00122      1713      1
>DP00122      1714      1
>DP00122      1715      1
>DP00122      1716      1
>DP00122      1717      1
>DP00122      1718      1
>DP00122      1719      1
>DP00122      1720      1
>DP00122      1721      1
>DP00122      1722      1
>DP00122      1723      1
>DP00122      1724      1
>DP00122      1725      1
>DP00122      1726      1
>DP00122      1727      1
>DP00122      1728      1
>DP00122      1729      1
>DP00122      1730      1
>DP00122      1731      1
>DP00122      1732      1
>DP00122      1733      1
>DP00122      1734      1
>DP00122      1735      1
>DP00122      1736      1
>DP00122      1737      1
>DP00122      1738      1
>DP00122      1739      1
>DP00122      1740      1
>DP00122      1741      1
>DP00122      1742      1
>DP00122      1743      1
>DP00122      1744      1
>DP00122      1745      1
>DP00122      1746      1
>DP00122      1747      1
>DP00122      1748      1
>DP00122      1749      1
>DP00122      1750      1
>DP00122      1751      1
>DP00122      1752      1
>DP00122      1753      1
>DP00122      1754      1
>DP00122      1755      1
>DP00122      1756      1
>DP00122      1757      1
>DP00122      1758      1
>DP00122      1759      1
>DP00122      1760      1
>DP00122      1761      1
>DP00122      1762      1
>DP00122      1763      1
>DP00122      1764      1
>DP00122      1765      1
>DP00122      1766      1
>DP00122      1767      1
>DP00122      1768      1
>DP00122      1769      1
>DP00122      1770      1
>DP00122      1771      1
>DP00122      1772      1
>DP00122      1773      1
>DP00122      1774      1
>DP00122      1775      1
>DP00122      1776      1
>DP00122      1777      1
>DP00122      1778      1
>DP00122      1779      1
>DP00122      1780      1
>DP00122      1781      1
>DP00122      1782      1
>DP00122      1783      1
>DP00122      1784      1
>DP00122      1785      1
>DP00122      1786      1
>DP00122      1787      1
>DP00122      1788      1
>DP00122      1789      1
>DP00122      1790      1
>DP00122      1791      1
>DP00122      1792      1
>DP00122      1793      1
>DP00122      1794      1
>DP00122      1795      1
>DP00122      1796      1
>DP00122      1797      1
>DP00122      1798      1
>DP00122      1799      1
>DP00122      1800      1
>DP00122      1801      1
>DP00122      1802      1
>DP00122      1803      1
>DP00122      1804      1
>DP00122      1805      1
>DP00122      1806      1
>DP00122      1807      1
>DP00122      1808      1
>DP00122      1809      1
>DP00122      1810      1
>DP00122      1811      1
>DP00122      1812      1
>DP00122      1813      1
>DP00122      1814      1
>DP00122      1815      1
>DP00122      1816      1
>DP00122      1817      1
>DP00122      1818      1
>DP00122      1819      1
>DP00122      1820      1
>DP00122      1821      1
>DP00122      1822      1
>DP00122      1823      1
>DP00122      1824      1
>DP00122      1825      1
>DP00122      1826      1
>DP00122      1827      1
>DP00122      1828      1
>DP00122      1829      1
>DP00122      1830      1
>DP00122      1831      1
>DP00122      1832      1
>DP00122      1833      1
>DP00122      1834      1
>DP00122      1835      1
>DP00122      1836      1
>DP00122      1837      1
>DP00122      1838      1
>DP00122      1839      1
>DP00122      1840      1
>DP00122      1841      1
>DP00122      1842      1
>DP00122      1843      1
>DP00122      1844      1
>DP00122      1845      1
>DP00122      1846      1
>DP00122      1847      1
>DP00122      1848      1
>DP00122      1849      1
>DP00122      1850      1
>DP00122      1851      1
>DP00122      1852      1
>DP00122      1853      1
>DP00122      1854      1
>DP00122      1855      1
>DP00122      1856      1
>DP00122      1857      1
>DP00122      1858      1
>DP00122      1859      1
>DP00122      1860      1
>DP00122      1861      1
>DP00571      1      0
>DP00571      2      0
>DP00571      3      0
>DP00571      4      0
>DP00571      5      0
>DP00571      6      0
>DP00571      7      0
>DP00571      8      0
>DP00571      9      0
>DP00571      10      0
>DP00571      11      0
>DP00571      12      0
>DP00571      13      0
>DP00571      14      0
>DP00571      15      0
>DP00571      16      0
>DP00571      17      0
>DP00571      18      0
>DP00571      19      0
>DP00571      20      0
>DP00571      21      0
>DP00571      22      0
>DP00571      23      0
>DP00571      24      0
>DP00571      25      0
>DP00571      26      0
>DP00571      27      0
>DP00571      28      0
>DP00571      29      0
>DP00571      30      0
>DP00571      31      0
>DP00571      32      0
>DP00571      33      0
>DP00571      34      0
>DP00571      35      0
>DP00571      36      0
>DP00571      37      0
>DP00571      38      0
>DP00571      39      0
>DP00571      40      0
>DP00571      41      0
>DP00571      42      0
>DP00571      43      0
>DP00571      44      0
>DP00571      45      0
>DP00571      46      0
>DP00571      47      0
>DP00571      48      0
>DP00571      49      0
>DP00571      50      0
>DP00571      51      0
>DP00571      52      0
>DP00571      53      0
>DP00571      54      0
>DP00571      55      0
>DP00571      56      0
>DP00571      57      0
>DP00571      58      0
>DP00571      59      0
>DP00571      60      0
>DP00571      61      0
>DP00571      62      0
>DP00571      63      0
>DP00571      64      0
>DP00571      65      0
>DP00571      66      0
>DP00571      67      0
>DP00571      68      0
>DP00571      69      0
>DP00571      70      0
>DP00571      71      0
>DP00571      72      0
>DP00571      73      0
>DP00571      74      0
>DP00571      75      0
>DP00571      76      0
>DP00571      77      0
>DP00571      78      0
>DP00571      79      0
>DP00571      80      0
>DP00571      81      0
>DP00571      82      0
>DP00571      83      0
>DP00571      84      0
>DP00571      85      0
>DP00571      86      0
>DP00571      87      0
>DP00571      88      0
>DP00571      89      0
>DP00571      90      0
>DP00571      91      0
>DP00571      92      0
>DP00571      93      0
>DP00571      94      0
>DP00571      95      0
>DP00571      96      0
>DP00571      97      0
>DP00571      98      0
>DP00571      99      0
>DP00571      100      0
>DP00571      101      0
>DP00571      102      0
>DP00571      103      0
>DP00571      104      0
>DP00571      105      0
>DP00571      106      0
>DP00571      107      0
>DP00571      108      0
>DP00571      109      0
>DP00571      110      1
>DP00571      111      1
>DP00571      112      1
>DP00571      113      1
>DP00571      114      1
>DP00571      115      1
>DP00571      116      1
>DP00571      117      0
>DP00571      118      0
>DP00571      119      0
>DP00571      120      0
>DP00571      121      0
>DP00571      122      0
>DP00571      123      0
>DP00571      124      0
>DP00571      125      0
>DP00571      126      0
>DP00571      127      0
>DP00571      128      0
>DP00571      129      0
>DP00571      130      0
>DP00571      131      0
>DP00571      132      0
>DP00571      133      0
>DP00571      134      0
>DP00571      135      0
>DP00571      136      0
>DP00571      137      0
>DP00571      138      0
>DP00571      139      0
>DP00571      140      0
>DP00571      141      0
>DP00571      142      0
>DP00571      143      0
>DP00571      144      0
>DP00571      145      0
>DP00571      146      1
>DP00571      147      1
>DP00571      148      1
>DP00571      149      1
>DP00571      150      1
>DP00571      151      1
>DP00571      152      1
>DP00571      153      1
>DP00571      154      1
>DP00571      155      1
>DP00571      156      1
>DP00571      157      1
>DP00571      158      0
>DP00571      159      0
>DP00571      160      0
>DP00571      161      0
>DP00571      162      0
>DP00571      163      0
>DP00571      164      0
>DP00571      165      0
>DP00571      166      0
>DP00571      167      0
>DP00571      168      0
>DP00571      169      0
>DP00571      170      0
>DP00571      171      0
>DP00571      172      0
>DP00571      173      0
>DP00571      174      0
>DP00571      175      0
>DP00571      176      0
>DP00571      177      0
>DP00571      178      0
>DP00571      179      0
>DP00571      180      0
>DP00571      181      0
>DP00571      182      0
>DP00571      183      0
>DP00571      184      0
>DP00571      185      0
>DP00571      186      0
>DP00571      187      0
>DP00571      188      0
>DP00571      189      0
>DP00571      190      0
>DP00571      191      0
>DP00571      192      0
>DP00571      193      0
>DP00571      194      0
>DP00571      195      0
>DP00571      196      0
>DP00571      197      0
>DP00571      198      0
>DP00571      199      0
>DP00571      200      0
>DP00571      201      0
>DP00571      202      0
>DP00571      203      0
>DP00571      204      0
>DP00571      205      0
>DP00571      206      0
>DP00571      207      0
>DP00571      208      0
>DP00571      209      0
>DP00571      210      0
>DP00571      211      0
>DP00571      212      0
>DP00571      213      0
>DP00571      214      0
>DP00571      215      0
>DP00571      216      0
>DP00571      217      0
>DP00571      218      0
>DP00571      219      0
>DP00571      220      0
>DP00571      221      0
>DP00571      222      0
>DP00571      223      0
>DP00571      224      0
>DP00571      225      0
>DP00571      226      0
>DP00571      227      0
>DP00571      228      0
>DP00571      229      0
>DP00571      230      0
>DP00571      231      0
>DP00571      232      0
>DP00571      233      0
>DP00571      234      0
>DP00571      235      0
>DP00571      236      0
>DP00571      237      0
>DP00571      238      0
>DP00571      239      0
>DP00571      240      0
>DP00571      241      0
>DP00571      242      0
>DP00571      243      0
>DP00571      244      0
>DP00571      245      0
>DP00571      246      0
>DP00571      247      0
>DP00571      248      0
>DP00571      249      0
>DP00571      250      0
>DP00571      251      0
>DP00571      252      0
>DP00571      253      0
>DP00571      254      0
>DP00571      255      0
>DP00571      256      0
>DP00571      257      0
>DP00571      258      0
>DP00571      259      0
>DP00571      260      0
>DP00571      261      0
>DP00571      262      0
>DP00571      263      0
>DP00571      264      0
>DP00571      265      0
>DP00571      266      0
>DP00571      267      0
>DP00571      268      0
>DP00571      269      0
>DP00571      270      0
>DP00571      271      0
>DP00571      272      0
>DP00571      273      0
>DP00571      274      0
>DP00571      275      0
>DP00571      276      0
>DP00571      277      0
>DP00571      278      0
>DP00571      279      0
>DP00571      280      0
>DP00571      281      0
>DP00571      282      0
>DP00571      283      0
>DP00571      284      0
>DP00571      285      0
>DP00571      286      0
>DP00571      287      0
>DP00571      288      0
>DP00571      289      0
>DP00571      290      0
>DP00571      291      0
>DP00571      292      0
>DP00571      293      0
>DP00571      294      0
>DP00571      295      0
>DP00571      296      0
>DP00571      297      0
>DP00571      298      0
>DP00571      299      0
>DP00571      300      0
>DP00571      301      0
>DP00571      302      0
>DP00571      303      0
>DP00571      304      0
>DP00571      305      0
>DP00571      306      0
>DP00571      307      0
>DP00571      308      0
>DP00571      309      0
>DP00571      310      0
>DP00571      311      0
>DP00571      312      0
>DP00571      313      0
>DP00571      314      0
>DP00571      315      0
>DP00571      316      0
>DP00571      317      0
>DP00571      318      0
>DP00571      319      0
>DP00571      320      0
>DP00571      321      0
>DP00571      322      0
>DP00571      323      0
>DP00571      324      0
>DP00571      325      0
>DP00571      326      0
>DP00571      327      0
>DP00571      328      0
>DP00571      329      0
>DP00571      330      0
>DP00571      331      0
>DP00571      332      0
>DP00571      333      0
>DP00571      334      0
>DP00571      335      0
>DP00571      336      0
>DP00571      337      0
>DP00571      338      0
>DP00571      339      0
>DP00571      340      0
>DP00571      341      0
>DP00571      342      0
>DP00571      343      0
>DP00571      344      0
>DP00571      345      0
>DP00571      346      0
>DP00571      347      0
>DP00571      348      0
>DP00571      349      0
>DP00571      350      0
>DP00571      351      0
>DP00571      352      0
>DP00571      353      0
>DP00571      354      0
>DP00571      355      0
>DP00571      356      0
>DP00571      357      0
>DP00571      358      0
>DP00571      359      0
>DP00571      360      0
>DP00571      361      0
>DP00571      362      0
>DP00571      363      0
>DP00571      364      0
>DP00571      365      0
>DP00571      366      0
>DP00571      367      0
>DP00571      368      0
>DP00571      369      0
>DP00571      370      0
>DP00571      371      0
>DP00571      372      0
>DP00571      373      0
>DP00571      374      0
>DP00571      375      0
>DP00571      376      0
>DP00571      377      0
>DP00571      378      0
>DP00571      379      0
>DP00571      380      0
>DP00571      381      0
>DP00571      382      0
>DP00571      383      0
>DP00571      384      0
>DP00571      385      0
>DP00571      386      0
>DP00571      387      0
>DP00571      388      0
>DP00571      389      0
>DP00571      390      0
>DP00571      391      0
>DP00571      392      0
>DP00571      393      0
>DP00571      394      0
>DP00571      395      0
>DP00571      396      0
>DP00571      397      0
>DP00571      398      0
>DP00571      399      0
>DP00571      400      0
>DP00571      401      0
>DP00571      402      0
>DP00571      403      0
>DP00571      404      0
>DP00571      405      0
>DP00571      406      0
>DP00571      407      0
>DP00571      408      0
>DP00571      409      0
>DP00571      410      0
>DP00571      411      0
>DP00571      412      0
>DP00571      413      0
>DP00571      414      0
>DP00571      415      0
>DP00571      416      0
>DP00571      417      0
>DP00571      418      0
>DP00571      419      0
>DP00571      420      0
>DP00571      421      0
>DP00571      422      0
>DP00571      423      0
>DP00571      424      0
>DP00571      425      0
>DP00571      426      0
>DP00571      427      0
>DP00571      428      0
>DP00571      429      0
>DP00571      430      0
>DP00571      431      0
>DP00571      432      0
>DP00571      433      0
>DP00571      434      0
>DP00571      435      0
>DP00571      436      0
>DP00571      437      0
>DP00571      438      0
>DP00571      439      0
>DP00571      440      0
>DP00571      441      0
>DP00571      442      0
>DP00571      443      0
>DP00571      444      0
>DP00571      445      0
>DP00571      446      0
>DP00571      447      0
>DP00571      448      0
>DP00571      449      0
>DP00571      450      0
>DP00571      451      0
>DP00571      452      0
>DP00571      453      0
>DP00571      454      0
>DP00571      455      0
>DP00571      456      0
>DP00571      457      0
>DP00571      458      0
>DP00571      459      0
>DP00571      460      0
>DP00571      461      0
>DP00571      462      0
>DP00571      463      0
>DP00571      464      0
>DP00571      465      0
>DP00571      466      0
>DP00571      467      0
>DP00571      468      0
>DP00571      469      0
>DP00571      470      0
>1x2n_A      1      0
>1x2n_A      2      0
>1x2n_A      3      0
>1x2n_A      4      0
>1x2n_A      5      0
>1x2n_A      6      0
>1x2n_A      7      0
>1x2n_A      8      0
>1x2n_A      9      0
>1x2n_A      10      0
>1x2n_A      11      0
>1x2n_A      12      0
>1x2n_A      13      0
>1x2n_A      14      0
>1x2n_A      15      0
>1x2n_A      16      0
>1x2n_A      17      0
>1x2n_A      18      0
>1x2n_A      19      0
>1x2n_A      20      0
>1x2n_A      21      0
>1x2n_A      22      0
>1x2n_A      23      0
>1x2n_A      24      0
>1x2n_A      25      0
>1x2n_A      26      0
>1x2n_A      27      0
>1x2n_A      28      0
>1x2n_A      29      0
>1x2n_A      30      0
>1x2n_A      31      0
>1x2n_A      32      0
>1x2n_A      33      0
>1x2n_A      34      0
>1x2n_A      35      0
>1x2n_A      36      0
>1x2n_A      37      0
>1x2n_A      38      0
>1x2n_A      39      0
>1x2n_A      40      0
>1x2n_A      41      0
>1x2n_A      42      0
>1x2n_A      43      0
>1x2n_A      44      0
>1x2n_A      45      0
>1x2n_A      46      0
>1x2n_A      47      0
>1x2n_A      48      0
>1x2n_A      49      0
>1x2n_A      50      0
>1x2n_A      51      0
>1x2n_A      52      0
>1x2n_A      53      0
>1x2n_A      54      0
>1x2n_A      55      0
>1x2n_A      56      0
>1x2n_A      57      0
>1x2n_A      58      0
>1x2n_A      59      0
>1x2n_A      60      0
>1x2n_A      61      0
>1x2n_A      62      0
>1x2n_A      63      0
>1x2n_A      64      0
>1x2n_A      65      0
>1x2n_A      66      0
>1x2n_A      67      0
>1x2n_A      68      0
>1x2n_A      69      0
>1x2n_A      70      0
>1x2n_A      71      0
>1x2n_A      72      0
>1x2n_A      73      0
>DP00126      1      1
>DP00126      2      1
>DP00126      3      1
>DP00126      4      1
>DP00126      5      1
>DP00126      6      1
>DP00126      7      1
>DP00126      8      1
>DP00126      9      1
>DP00126      10      1
>DP00126      11      1
>DP00126      12      1
>DP00126      13      1
>DP00126      14      1
>DP00126      15      1
>DP00126      16      1
>DP00126      17      1
>DP00126      18      1
>DP00126      19      1
>DP00126      20      1
>DP00126      21      1
>DP00126      22      1
>DP00126      23      1
>DP00126      24      1
>DP00126      25      1
>DP00126      26      1
>DP00126      27      1
>DP00126      28      1
>DP00126      29      1
>DP00126      30      1
>DP00126      31      1
>DP00126      32      1
>DP00126      33      1
>DP00126      34      1
>DP00126      35      1
>DP00126      36      1
>DP00126      37      1
>DP00126      38      1
>DP00126      39      1
>DP00126      40      1
>DP00126      41      1
>DP00126      42      1
>DP00126      43      1
>DP00126      44      1
>DP00126      45      1
>DP00126      46      1
>DP00126      47      1
>DP00126      48      1
>DP00126      49      1
>DP00126      50      1
>DP00126      51      1
>DP00126      52      1
>DP00126      53      1
>DP00126      54      1
>DP00126      55      1
>DP00126      56      1
>DP00126      57      1
>DP00126      58      1
>DP00126      59      1
>DP00126      60      1
>DP00126      61      1
>DP00126      62      1
>DP00126      63      1
>DP00126      64      1
>DP00126      65      1
>DP00126      66      1
>DP00126      67      1
>DP00126      68      1
>DP00126      69      1
>DP00126      70      1
>DP00126      71      1
>DP00126      72      1
>DP00126      73      1
>DP00126      74      1
>DP00126      75      1
>DP00126      76      1
>DP00126      77      1
>DP00126      78      1
>DP00126      79      1
>DP00126      80      1
>DP00126      81      1
>DP00126      82      1
>DP00126      83      1
>DP00126      84      1
>DP00126      85      1
>DP00126      86      1
>DP00126      87      1
>DP00126      88      1
>DP00126      89      1
>DP00126      90      1
>DP00126      91      1
>DP00126      92      1
>DP00126      93      1
>DP00126      94      1
>DP00126      95      1
>DP00126      96      1
>DP00126      97      1
>DP00126      98      1
>DP00126      99      1
>DP00126      100      1
>DP00126      101      1
>DP00126      102      1
>DP00126      103      1
>DP00126      104      1
>DP00126      105      1
>DP00126      106      1
>DP00126      107      1
>DP00126      108      1
>DP00126      109      1
>DP00126      110      1
>DP00126      111      1
>DP00126      112      1
>DP00126      113      1
>DP00126      114      1
>DP00126      115      1
>DP00126      116      1
>DP00126      117      1
>DP00126      118      1
>DP00126      119      1
>DP00126      120      1
>DP00126      121      1
>DP00126      122      1
>DP00126      123      1
>DP00126      124      1
>DP00126      125      1
>DP00126      126      1
>DP00126      127      1
>DP00126      128      1
>DP00126      129      1
>DP00126      130      1
>DP00126      131      1
>DP00126      132      1
>DP00126      133      1
>DP00126      134      1
>DP00126      135      1
>DP00126      136      1
>DP00126      137      1
>DP00126      138      1
>DP00126      139      1
>DP00126      140      1
>DP00126      141      1
>DP00126      142      1
>DP00126      143      1
>DP00126      144      1
>DP00126      145      1
>DP00126      146      1
>DP00126      147      1
>DP00126      148      1
>DP00126      149      1
>DP00126      150      1
>DP00126      151      1
>DP00126      152      1
>DP00126      153      1
>DP00126      154      1
>DP00126      155      1
>DP00126      156      1
>DP00126      157      1
>DP00126      158      1
>DP00126      159      1
>DP00126      160      1
>DP00126      161      1
>DP00126      162      1
>DP00126      163      1
>DP00126      164      1
>DP00126      165      1
>DP00126      166      1
>DP00126      167      1
>DP00126      168      1
>DP00126      169      1
>DP00126      170      1
>DP00126      171      1
>DP00126      172      1
>DP00126      173      1
>DP00126      174      1
>DP00126      175      1
>DP00126      176      1
>DP00126      177      1
>DP00126      178      1
>DP00126      179      1
>DP00126      180      1
>DP00126      181      1
>DP00126      182      1
>DP00126      183      1
>DP00126      184      1
>DP00126      185      1
>DP00126      186      1
>DP00126      187      1
>DP00126      188      1
>DP00126      189      1
>DP00126      190      1
>DP00126      191      1
>DP00126      192      1
>DP00126      193      1
>DP00126      194      1
>DP00126      195      1
>DP00126      196      1
>DP00126      197      1
>DP00126      198      1
>DP00126      199      1
>DP00126      200      1
>DP00126      201      1
>DP00126      202      1
>DP00126      203      1
>DP00126      204      1
>DP00126      205      1
>DP00126      206      1
>DP00126      207      1
>DP00126      208      1
>DP00126      209      1
>DP00126      210      1
>DP00126      211      1
>DP00126      212      1
>DP00126      213      1
>DP00126      214      1
>DP00126      215      1
>DP00126      216      1
>DP00126      217      1
>DP00126      218      1
>DP00126      219      1
>DP00126      220      1
>DP00126      221      1
>DP00126      222      1
>DP00126      223      1
>DP00126      224      1
>DP00126      225      1
>DP00126      226      1
>DP00126      227      1
>DP00126      228      1
>DP00126      229      1
>DP00126      230      1
>DP00126      231      1
>DP00126      232      1
>DP00126      233      1
>DP00126      234      1
>DP00126      235      1
>DP00126      236      1
>DP00126      237      1
>DP00126      238      1
>DP00126      239      1
>DP00126      240      1
>DP00126      241      1
>DP00126      242      1
>DP00126      243      1
>DP00126      244      1
>DP00126      245      1
>DP00126      246      1
>DP00126      247      1
>DP00126      248      1
>DP00126      249      1
>DP00126      250      1
>DP00126      251      1
>DP00126      252      1
>DP00126      253      1
>DP00126      254      1
>DP00126      255      1
>DP00126      256      1
>DP00126      257      1
>DP00126      258      1
>DP00126      259      1
>DP00126      260      1
>DP00126      261      1
>DP00126      262      1
>DP00126      263      1
>DP00126      264      1
>DP00126      265      1
>DP00126      266      1
>DP00126      267      1
>DP00126      268      1
>DP00126      269      1
>DP00126      270      1
>DP00126      271      1
>DP00126      272      1
>DP00126      273      1
>DP00126      274      1
>DP00126      275      1
>DP00126      276      1
>DP00126      277      1
>DP00126      278      1
>DP00126      279      1
>DP00126      280      1
>DP00126      281      1
>DP00126      282      1
>DP00126      283      1
>DP00126      284      1
>DP00126      285      1
>DP00126      286      1
>DP00126      287      1
>DP00126      288      1
>DP00126      289      1
>DP00126      290      1
>DP00126      291      1
>DP00126      292      1
>DP00126      293      1
>DP00126      294      1
>DP00126      295      1
>DP00126      296      1
>DP00126      297      1
>DP00126      298      1
>DP00126      299      1
>DP00126      300      1
>DP00126      301      1
>DP00126      302      1
>DP00126      303      1
>DP00126      304      1
>DP00126      305      1
>DP00126      306      1
>DP00126      307      1
>DP00126      308      1
>DP00126      309      1
>DP00126      310      1
>DP00126      311      1
>DP00126      312      1
>DP00126      313      1
>DP00126      314      1
>DP00126      315      1
>DP00126      316      1
>DP00126      317      1
>DP00126      318      1
>DP00126      319      1
>DP00126      320      1
>DP00126      321      1
>DP00126      322      1
>DP00126      323      1
>DP00126      324      1
>DP00126      325      1
>DP00126      326      1
>DP00126      327      1
>DP00126      328      1
>DP00126      329      1
>DP00126      330      1
>DP00126      331      1
>DP00126      332      1
>DP00126      333      1
>DP00126      334      1
>DP00126      335      1
>DP00126      336      1
>DP00126      337      1
>DP00126      338      1
>DP00126      339      1
>DP00126      340      1
>DP00126      341      1
>DP00126      342      1
>DP00126      343      1
>DP00126      344      1
>DP00126      345      1
>DP00126      346      1
>DP00126      347      1
>DP00126      348      1
>DP00126      349      1
>DP00126      350      1
>DP00126      351      1
>DP00126      352      1
>DP00126      353      1
>DP00126      354      1
>DP00126      355      1
>DP00126      356      1
>DP00126      357      1
>DP00126      358      1
>DP00126      359      1
>DP00126      360      1
>DP00126      361      1
>DP00126      362      1
>DP00126      363      1
>DP00126      364      1
>DP00126      365      1
>DP00126      366      1
>DP00126      367      1
>DP00126      368      1
>DP00126      369      1
>DP00126      370      1
>DP00126      371      1
>DP00126      372      1
>DP00126      373      1
>DP00126      374      1
>DP00126      375      1
>DP00126      376      1
>DP00126      377      1
>DP00126      378      1
>DP00126      379      1
>DP00126      380      1
>DP00126      381      1
>DP00126      382      1
>DP00126      383      1
>DP00126      384      1
>DP00126      385      1
>DP00126      386      1
>DP00126      387      1
>DP00126      388      1
>DP00126      389      1
>DP00126      390      1
>DP00126      391      1
>DP00126      392      1
>DP00126      393      1
>DP00126      394      1
>DP00126      395      1
>DP00126      396      1
>DP00126      397      1
>DP00126      398      1
>DP00126      399      1
>DP00126      400      1
>DP00126      401      1
>DP00126      402      1
>DP00126      403      1
>DP00126      404      1
>DP00126      405      1
>DP00126      406      1
>DP00126      407      1
>DP00126      408      1
>DP00126      409      1
>DP00126      410      1
>DP00126      411      1
>DP00126      412      1
>DP00126      413      1
>DP00126      414      1
>DP00126      415      1
>DP00126      416      1
>DP00126      417      1
>DP00126      418      1
>DP00126      419      1
>DP00126      420      1
>DP00126      421      1
>DP00126      422      1
>DP00126      423      1
>DP00126      424      1
>DP00126      425      1
>DP00126      426      1
>DP00126      427      1
>DP00126      428      1
>DP00126      429      1
>DP00126      430      1
>DP00126      431      1
>DP00126      432      1
>DP00126      433      1
>DP00126      434      1
>DP00126      435      1
>DP00126      436      1
>DP00126      437      1
>DP00126      438      1
>DP00126      439      1
>DP00126      440      1
>DP00126      441      1
>DP00396      1      0
>DP00396      2      0
>DP00396      3      0
>DP00396      4      0
>DP00396      5      0
>DP00396      6      0
>DP00396      7      0
>DP00396      8      0
>DP00396      9      0
>DP00396      10      0
>DP00396      11      0
>DP00396      12      0
>DP00396      13      0
>DP00396      14      0
>DP00396      15      0
>DP00396      16      0
>DP00396      17      0
>DP00396      18      0
>DP00396      19      0
>DP00396      20      0
>DP00396      21      0
>DP00396      22      0
>DP00396      23      0
>DP00396      24      0
>DP00396      25      0
>DP00396      26      0
>DP00396      27      0
>DP00396      28      0
>DP00396      29      0
>DP00396      30      0
>DP00396      31      0
>DP00396      32      0
>DP00396      33      0
>DP00396      34      0
>DP00396      35      0
>DP00396      36      0
>DP00396      37      0
>DP00396      38      0
>DP00396      39      0
>DP00396      40      0
>DP00396      41      0
>DP00396      42      0
>DP00396      43      0
>DP00396      44      0
>DP00396      45      0
>DP00396      46      0
>DP00396      47      0
>DP00396      48      0
>DP00396      49      0
>DP00396      50      0
>DP00396      51      0
>DP00396      52      0
>DP00396      53      0
>DP00396      54      0
>DP00396      55      0
>DP00396      56      0
>DP00396      57      0
>DP00396      58      0
>DP00396      59      0
>DP00396      60      0
>DP00396      61      0
>DP00396      62      0
>DP00396      63      0
>DP00396      64      0
>DP00396      65      0
>DP00396      66      0
>DP00396      67      0
>DP00396      68      0
>DP00396      69      0
>DP00396      70      0
>DP00396      71      0
>DP00396      72      0
>DP00396      73      0
>DP00396      74      0
>DP00396      75      0
>DP00396      76      0
>DP00396      77      0
>DP00396      78      0
>DP00396      79      0
>DP00396      80      0
>DP00396      81      0
>DP00396      82      0
>DP00396      83      0
>DP00396      84      0
>DP00396      85      0
>DP00396      86      0
>DP00396      87      0
>DP00396      88      0
>DP00396      89      0
>DP00396      90      0
>DP00396      91      0
>DP00396      92      0
>DP00396      93      0
>DP00396      94      0
>DP00396      95      0
>DP00396      96      0
>DP00396      97      0
>DP00396      98      0
>DP00396      99      0
>DP00396      100      0
>DP00396      101      0
>DP00396      102      0
>DP00396      103      0
>DP00396      104      0
>DP00396      105      0
>DP00396      106      0
>DP00396      107      0
>DP00396      108      0
>DP00396      109      0
>DP00396      110      0
>DP00396      111      0
>DP00396      112      0
>DP00396      113      0
>DP00396      114      0
>DP00396      115      0
>DP00396      116      0
>DP00396      117      0
>DP00396      118      0
>DP00396      119      0
>DP00396      120      0
>DP00396      121      0
>DP00396      122      0
>DP00396      123      0
>DP00396      124      0
>DP00396      125      0
>DP00396      126      0
>DP00396      127      0
>DP00396      128      0
>DP00396      129      0
>DP00396      130      0
>DP00396      131      0
>DP00396      132      0
>DP00396      133      0
>DP00396      134      0
>DP00396      135      0
>DP00396      136      0
>DP00396      137      0
>DP00396      138      0
>DP00396      139      0
>DP00396      140      0
>DP00396      141      0
>DP00396      142      0
>DP00396      143      0
>DP00396      144      0
>DP00396      145      0
>DP00396      146      0
>DP00396      147      0
>DP00396      148      0
>DP00396      149      0
>DP00396      150      0
>DP00396      151      0
>DP00396      152      0
>DP00396      153      0
>DP00396      154      0
>DP00396      155      0
>DP00396      156      0
>DP00396      157      0
>DP00396      158      0
>DP00396      159      0
>DP00396      160      0
>DP00396      161      0
>DP00396      162      0
>DP00396      163      0
>DP00396      164      0
>DP00396      165      0
>DP00396      166      0
>DP00396      167      0
>DP00396      168      0
>DP00396      169      0
>DP00396      170      0
>DP00396      171      0
>DP00396      172      0
>DP00396      173      0
>DP00396      174      0
>DP00396      175      0
>DP00396      176      0
>DP00396      177      0
>DP00396      178      0
>DP00396      179      0
>DP00396      180      0
>DP00396      181      0
>DP00396      182      0
>DP00396      183      0
>DP00396      184      0
>DP00396      185      0
>DP00396      186      0
>DP00396      187      0
>DP00396      188      0
>DP00396      189      0
>DP00396      190      0
>DP00396      191      0
>DP00396      192      0
>DP00396      193      0
>DP00396      194      0
>DP00396      195      0
>DP00396      196      1
>DP00396      197      1
>DP00396      198      1
>DP00396      199      1
>DP00396      200      1
>DP00396      201      1
>DP00396      202      1
>DP00396      203      1
>DP00396      204      1
>DP00396      205      1
>DP00396      206      1
>DP00396      207      1
>DP00396      208      1
>DP00396      209      1
>DP00396      210      1
>DP00396      211      1
>DP00396      212      1
>DP00396      213      1
>DP00396      214      1
>DP00396      215      0
>DP00396      216      0
>DP00396      217      0
>DP00396      218      0
>DP00396      219      0
>DP00396      220      0
>DP00396      221      0
>DP00396      222      0
>DP00396      223      0
>DP00396      224      0
>DP00396      225      0
>DP00396      226      0
>DP00396      227      0
>DP00396      228      0
>DP00396      229      0
>DP00396      230      0
>DP00396      231      0
>DP00396      232      0
>DP00396      233      0
>DP00396      234      0
>DP00396      235      0
>DP00396      236      0
>DP00396      237      0
>DP00396      238      0
>DP00396      239      0
>DP00396      240      0
>DP00396      241      0
>DP00396      242      0
>DP00396      243      0
>DP00396      244      0
>DP00396      245      0
>DP00396      246      0
>DP00396      247      0
>DP00396      248      0
>DP00396      249      0
>DP00396      250      0
>DP00396      251      0
>DP00396      252      0
>DP00396      253      0
>DP00396      254      0
>DP00396      255      0
>DP00396      256      0
>DP00396      257      0
>DP00396      258      0
>DP00396      259      0
>DP00396      260      0
>DP00396      261      0
>DP00396      262      0
>DP00396      263      0
>DP00396      264      0
>DP00396      265      0
>DP00396      266      0
>DP00396      267      0
>DP00396      268      0
>DP00396      269      0
>DP00396      270      0
>DP00396      271      0
>DP00396      272      0
>DP00396      273      0
>DP00396      274      0
>DP00396      275      0
>DP00396      276      0
>DP00396      277      0
>DP00396      278      0
>DP00396      279      0
>DP00396      280      1
>DP00396      281      1
>DP00396      282      1
>DP00396      283      1
>DP00396      284      1
>DP00396      285      1
>DP00396      286      1
>DP00396      287      1
>DP00396      288      1
>DP00396      289      1
>DP00396      290      1
>DP00396      291      1
>DP00396      292      1
>DP00396      293      1
>DP00396      294      1
>DP00396      295      1
>DP00396      296      1
>DP00396      297      1
>DP00396      298      1
>DP00396      299      1
>DP00396      300      1
>DP00396      301      1
>DP00396      302      1
>DP00396      303      1
>DP00396      304      1
>DP00396      305      1
>DP00396      306      1
>DP00396      307      1
>DP00396      308      0
>DP00396      309      0
>DP00396      310      0
>DP00396      311      0
>DP00396      312      0
>DP00396      313      0
>DP00396      314      0
>DP00396      315      0
>DP00396      316      0
>DP00396      317      0
>DP00396      318      0
>DP00396      319      0
>DP00396      320      0
>DP00396      321      0
>DP00396      322      0
>DP00396      323      0
>DP00396      324      0
>DP00396      325      1
>DP00396      326      1
>DP00396      327      1
>DP00396      328      1
>DP00396      329      1
>DP00396      330      1
>DP00396      331      1
>DP00396      332      1
>DP00396      333      1
>DP00396      334      1
>DP00396      335      1
>DP00396      336      0
>DP00396      337      0
>DP00396      338      0
>DP00396      339      0
>DP00396      340      0
>DP00396      341      0
>DP00396      342      0
>DP00396      343      0
>DP00396      344      0
>DP00396      345      0
>DP00396      346      0
>DP00396      347      0
>DP00396      348      0
>DP00396      349      0
>DP00396      350      0
>DP00396      351      0
>DP00396      352      0
>DP00396      353      0
>DP00396      354      0
>DP00396      355      0
>DP00396      356      0
>DP00396      357      0
>DP00396      358      0
>DP00396      359      0
>DP00396      360      0
>DP00396      361      0
>DP00396      362      0
>DP00396      363      0
>DP00396      364      0
>DP00396      365      0
>DP00396      366      0
>DP00396      367      0
>DP00396      368      0
>DP00396      369      0
>DP00396      370      0
>DP00396      371      0
>DP00396      372      0
>DP00396      373      0
>DP00396      374      0
>DP00396      375      0
>DP00396      376      0
>DP00396      377      0
>DP00396      378      0
>DP00396      379      0
>DP00396      380      0
>DP00396      381      0
>DP00396      382      0
>DP00396      383      0
>DP00396      384      0
>DP00396      385      0
>DP00396      386      0
>DP00396      387      0
>DP00396      388      0
>DP00396      389      0
>DP00396      390      0
>DP00396      391      0
>DP00396      392      0
>DP00396      393      0
>DP00396      394      0
>DP00396      395      0
>DP00396      396      0
>DP00396      397      0
>DP00396      398      0
>DP00396      399      0
>DP00396      400      0
>DP00396      401      0
>DP00396      402      0
>DP00396      403      0
>DP00396      404      0
>DP00396      405      0
>DP00396      406      0
>DP00396      407      0
>DP00396      408      0
>DP00396      409      0
>DP00396      410      0
>DP00396      411      0
>DP00396      412      0
>DP00396      413      0
>DP00396      414      0
>DP00396      415      0
>DP00396      416      0
>DP00396      417      0
>DP00396      418      0
>DP00396      419      0
>DP00396      420      0
>DP00396      421      0
>DP00396      422      0
>DP00396      423      0
>DP00396      424      0
>DP00396      425      0
>DP00396      426      0
>DP00396      427      0
>DP00396      428      0
>DP00396      429      0
>DP00396      430      0
>DP00396      431      0
>DP00396      432      0
>DP00396      433      0
>DP00396      434      0
>DP00396      435      0
>DP00396      436      0
>DP00396      437      0
>DP00396      438      0
>DP00396      439      0
>DP00396      440      0
>DP00396      441      0
>DP00396      442      0
>DP00396      443      0
>DP00396      444      0
>DP00396      445      0
>DP00396      446      0
>DP00396      447      0
>DP00396      448      0
>DP00396      449      0
>DP00396      450      0
>DP00396      451      0
>DP00396      452      0
>DP00396      453      0
>DP00396      454      0
>DP00396      455      0
>DP00396      456      0
>DP00396      457      0
>DP00396      458      0
>DP00396      459      0
>DP00396      460      0
>DP00396      461      0
>DP00396      462      0
>DP00396      463      0
>DP00396      464      0
>DP00396      465      0
>DP00396      466      0
>DP00396      467      0
>DP00396      468      0
>DP00396      469      0
>DP00396      470      0
>DP00396      471      0
>DP00396      472      0
>DP00396      473      0
>DP00396      474      0
>DP00396      475      0
>DP00396      476      0
>DP00396      477      0
>DP00396      478      0
>DP00396      479      0
>DP00396      480      0
>DP00396      481      0
>DP00396      482      0
>DP00396      483      0
>DP00396      484      0
>DP00396      485      0
>DP00396      486      0
>DP00396      487      0
>DP00396      488      0
>DP00396      489      0
>DP00396      490      0
>DP00396      491      0
>DP00396      492      0
>DP00396      493      0
>DP00396      494      0
>DP00396      495      0
>DP00396      496      0
>DP00396      497      0
>DP00396      498      0
>DP00396      499      0
>DP00396      500      0
>DP00396      501      0
>DP00396      502      0
>DP00396      503      0
>DP00396      504      0
>DP00396      505      0
>DP00396      506      0
>DP00396      507      0
>DP00396      508      0
>DP00396      509      0
>DP00396      510      0
>DP00396      511      0
>DP00396      512      0
>DP00396      513      0
>DP00396      514      0
>DP00396      515      0
>DP00396      516      0
>DP00396      517      0
>DP00396      518      0
>DP00396      519      0
>DP00396      520      0
>DP00396      521      0
>DP00396      522      0
>DP00396      523      0
>DP00396      524      0
>DP00396      525      0
>DP00396      526      0
>DP00396      527      0
>DP00396      528      0
>DP00396      529      0
>DP00396      530      0
>DP00396      531      0
>DP00396      532      0
>DP00396      533      0
>DP00396      534      0
>DP00396      535      0
>DP00396      536      0
>DP00396      537      0
>DP00396      538      0
>DP00396      539      0
>DP00396      540      0
>DP00396      541      0
>DP00396      542      0
>DP00396      543      0
>DP00396      544      0
>DP00396      545      0
>DP00396      546      0
>DP00396      547      0
>DP00396      548      0
>DP00396      549      0
>DP00396      550      0
>DP00396      551      0
>DP00396      552      0
>DP00396      553      0
>DP00396      554      0
>DP00396      555      0
>DP00396      556      0
>DP00396      557      0
>DP00396      558      0
>DP00396      559      0
>DP00396      560      0
>DP00396      561      0
>DP00396      562      0
>DP00396      563      0
>DP00396      564      0
>DP00396      565      0
>DP00396      566      0
>DP00396      567      0
>DP00396      568      0
>DP00396      569      0
>DP00396      570      0
>DP00396      571      0
>DP00396      572      0
>DP00396      573      0
>DP00396      574      0
>DP00396      575      0
>DP00396      576      0
>DP00396      577      0
>DP00396      578      0
>DP00396      579      0
>DP00396      580      0
>DP00396      581      0
>DP00396      582      0
>DP00396      583      0
>DP00396      584      0
>DP00396      585      0
>DP00396      586      0
>DP00396      587      0
>DP00396      588      0
>DP00396      589      0
>DP00396      590      0
>DP00396      591      0
>DP00396      592      0
>DP00396      593      0
>DP00396      594      0
>DP00396      595      0
>DP00396      596      0
>DP00396      597      0
>DP00396      598      0
>DP00396      599      0
>DP00396      600      0
>DP00396      601      0
>DP00396      602      0
>DP00396      603      0
>DP00396      604      0
>DP00396      605      0
>DP00396      606      0
>DP00396      607      0
>DP00396      608      0
>DP00396      609      0
>DP00396      610      0
>DP00396      611      0
>DP00396      612      0
>DP00396      613      0
>DP00396      614      0
>DP00396      615      0
>DP00396      616      0
>DP00396      617      0
>DP00396      618      0
>DP00396      619      0
>DP00396      620      0
>DP00396      621      0
>DP00396      622      0
>DP00396      623      0
>DP00396      624      0
>DP00396      625      0
>DP00396      626      0
>DP00396      627      0
>DP00396      628      0
>DP00396      629      0
>DP00396      630      0
>DP00396      631      0
>DP00396      632      0
>DP00396      633      0
>DP00396      634      0
>DP00396      635      0
>DP00396      636      0
>DP00396      637      0
>DP00396      638      0
>DP00396      639      0
>DP00396      640      0
>DP00396      641      0
>DP00396      642      0
>DP00396      643      0
>DP00396      644      0
>DP00396      645      0
>DP00396      646      0
>DP00396      647      0
>DP00396      648      0
>DP00396      649      0
>DP00396      650      0
>DP00396      651      0
>DP00396      652      0
>DP00396      653      0
>DP00396      654      0
>DP00396      655      0
>DP00396      656      0
>DP00396      657      0
>DP00396      658      0
>DP00396      659      0
>DP00396      660      0
>DP00396      661      0
>DP00396      662      0
>1m1n_A      1      0
>1m1n_A      2      0
>1m1n_A      3      0
>1m1n_A      4      0
>1m1n_A      5      0
>1m1n_A      6      0
>1m1n_A      7      0
>1m1n_A      8      0
>1m1n_A      9      0
>1m1n_A      10      0
>1m1n_A      11      0
>1m1n_A      12      0
>1m1n_A      13      0
>1m1n_A      14      0
>1m1n_A      15      0
>1m1n_A      16      0
>1m1n_A      17      0
>1m1n_A      18      0
>1m1n_A      19      0
>1m1n_A      20      0
>1m1n_A      21      0
>1m1n_A      22      0
>1m1n_A      23      0
>1m1n_A      24      0
>1m1n_A      25      0
>1m1n_A      26      0
>1m1n_A      27      0
>1m1n_A      28      0
>1m1n_A      29      0
>1m1n_A      30      0
>1m1n_A      31      0
>1m1n_A      32      0
>1m1n_A      33      0
>1m1n_A      34      0
>1m1n_A      35      0
>1m1n_A      36      0
>1m1n_A      37      0
>1m1n_A      38      0
>1m1n_A      39      0
>1m1n_A      40      0
>1m1n_A      41      0
>1m1n_A      42      0
>1m1n_A      43      0
>1m1n_A      44      0
>1m1n_A      45      0
>1m1n_A      46      0
>1m1n_A      47      0
>1m1n_A      48      0
>1m1n_A      49      0
>1m1n_A      50      0
>1m1n_A      51      0
>1m1n_A      52      0
>1m1n_A      53      0
>1m1n_A      54      0
>1m1n_A      55      0
>1m1n_A      56      0
>1m1n_A      57      0
>1m1n_A      58      0
>1m1n_A      59      0
>1m1n_A      60      0
>1m1n_A      61      0
>1m1n_A      62      0
>1m1n_A      63      0
>1m1n_A      64      0
>1m1n_A      65      0
>1m1n_A      66      0
>1m1n_A      67      0
>1m1n_A      68      0
>1m1n_A      69      0
>1m1n_A      70      0
>1m1n_A      71      0
>1m1n_A      72      0
>1m1n_A      73      0
>1m1n_A      74      0
>1m1n_A      75      0
>1m1n_A      76      0
>1m1n_A      77      0
>1m1n_A      78      0
>1m1n_A      79      0
>1m1n_A      80      0
>1m1n_A      81      0
>1m1n_A      82      0
>1m1n_A      83      0
>1m1n_A      84      0
>1m1n_A      85      0
>1m1n_A      86      0
>1m1n_A      87      0
>1m1n_A      88      0
>1m1n_A      89      0
>1m1n_A      90      0
>1m1n_A      91      0
>1m1n_A      92      0
>1m1n_A      93      0
>1m1n_A      94      0
>1m1n_A      95      0
>1m1n_A      96      0
>1m1n_A      97      0
>1m1n_A      98      0
>1m1n_A      99      0
>1m1n_A      100      0
>1m1n_A      101      0
>1m1n_A      102      0
>1m1n_A      103      0
>1m1n_A      104      0
>1m1n_A      105      0
>1m1n_A      106      0
>1m1n_A      107      0
>1m1n_A      108      0
>1m1n_A      109      0
>1m1n_A      110      0
>1m1n_A      111      0
>1m1n_A      112      0
>1m1n_A      113      0
>1m1n_A      114      0
>1m1n_A      115      0
>1m1n_A      116      0
>1m1n_A      117      0
>1m1n_A      118      0
>1m1n_A      119      0
>1m1n_A      120      0
>1m1n_A      121      0
>1m1n_A      122      0
>1m1n_A      123      0
>1m1n_A      124      0
>1m1n_A      125      0
>1m1n_A      126      0
>1m1n_A      127      0
>1m1n_A      128      0
>1m1n_A      129      0
>1m1n_A      130      0
>1m1n_A      131      0
>1m1n_A      132      0
>1m1n_A      133      0
>1m1n_A      134      0
>1m1n_A      135      0
>1m1n_A      136      0
>1m1n_A      137      0
>1m1n_A      138      0
>1m1n_A      139      0
>1m1n_A      140      0
>1m1n_A      141      0
>1m1n_A      142      0
>1m1n_A      143      0
>1m1n_A      144      0
>1m1n_A      145      0
>1m1n_A      146      0
>1m1n_A      147      0
>1m1n_A      148      0
>1m1n_A      149      0
>1m1n_A      150      0
>1m1n_A      151      0
>1m1n_A      152      0
>1m1n_A      153      0
>1m1n_A      154      0
>1m1n_A      155      0
>1m1n_A      156      0
>1m1n_A      157      0
>1m1n_A      158      0
>1m1n_A      159      0
>1m1n_A      160      0
>1m1n_A      161      0
>1m1n_A      162      0
>1m1n_A      163      0
>1m1n_A      164      0
>1m1n_A      165      0
>1m1n_A      166      0
>1m1n_A      167      0
>1m1n_A      168      0
>1m1n_A      169      0
>1m1n_A      170      0
>1m1n_A      171      0
>1m1n_A      172      0
>1m1n_A      173      0
>1m1n_A      174      0
>1m1n_A      175      0
>1m1n_A      176      0
>1m1n_A      177      0
>1m1n_A      178      0
>1m1n_A      179      0
>1m1n_A      180      0
>1m1n_A      181      0
>1m1n_A      182      0
>1m1n_A      183      0
>1m1n_A      184      0
>1m1n_A      185      0
>1m1n_A      186      0
>1m1n_A      187      0
>1m1n_A      188      0
>1m1n_A      189      0
>1m1n_A      190      0
>1m1n_A      191      0
>1m1n_A      192      0
>1m1n_A      193      0
>1m1n_A      194      0
>1m1n_A      195      0
>1m1n_A      196      0
>1m1n_A      197      0
>1m1n_A      198      0
>1m1n_A      199      0
>1m1n_A      200      0
>1m1n_A      201      0
>1m1n_A      202      0
>1m1n_A      203      0
>1m1n_A      204      0
>1m1n_A      205      0
>1m1n_A      206      0
>1m1n_A      207      0
>1m1n_A      208      0
>1m1n_A      209      0
>1m1n_A      210      0
>1m1n_A      211      0
>1m1n_A      212      0
>1m1n_A      213      0
>1m1n_A      214      0
>1m1n_A      215      0
>1m1n_A      216      0
>1m1n_A      217      0
>1m1n_A      218      0
>1m1n_A      219      0
>1m1n_A      220      0
>1m1n_A      221      0
>1m1n_A      222      0
>1m1n_A      223      0
>1m1n_A      224      0
>1m1n_A      225      0
>1m1n_A      226      0
>1m1n_A      227      0
>1m1n_A      228      0
>1m1n_A      229      0
>1m1n_A      230      0
>1m1n_A      231      0
>1m1n_A      232      0
>1m1n_A      233      0
>1m1n_A      234      0
>1m1n_A      235      0
>1m1n_A      236      0
>1m1n_A      237      0
>1m1n_A      238      0
>1m1n_A      239      0
>1m1n_A      240      0
>1m1n_A      241      0
>1m1n_A      242      0
>1m1n_A      243      0
>1m1n_A      244      0
>1m1n_A      245      0
>1m1n_A      246      0
>1m1n_A      247      0
>1m1n_A      248      0
>1m1n_A      249      0
>1m1n_A      250      0
>1m1n_A      251      0
>1m1n_A      252      0
>1m1n_A      253      0
>1m1n_A      254      0
>1m1n_A      255      0
>1m1n_A      256      0
>1m1n_A      257      0
>1m1n_A      258      0
>1m1n_A      259      0
>1m1n_A      260      0
>1m1n_A      261      0
>1m1n_A      262      0
>1m1n_A      263      0
>1m1n_A      264      0
>1m1n_A      265      0
>1m1n_A      266      0
>1m1n_A      267      0
>1m1n_A      268      0
>1m1n_A      269      0
>1m1n_A      270      0
>1m1n_A      271      0
>1m1n_A      272      0
>1m1n_A      273      0
>1m1n_A      274      0
>1m1n_A      275      0
>1m1n_A      276      0
>1m1n_A      277      0
>1m1n_A      278      0
>1m1n_A      279      0
>1m1n_A      280      0
>1m1n_A      281      0
>1m1n_A      282      0
>1m1n_A      283      0
>1m1n_A      284      0
>1m1n_A      285      0
>1m1n_A      286      0
>1m1n_A      287      0
>1m1n_A      288      0
>1m1n_A      289      0
>1m1n_A      290      0
>1m1n_A      291      0
>1m1n_A      292      0
>1m1n_A      293      0
>1m1n_A      294      0
>1m1n_A      295      0
>1m1n_A      296      0
>1m1n_A      297      0
>1m1n_A      298      0
>1m1n_A      299      0
>1m1n_A      300      0
>1m1n_A      301      0
>1m1n_A      302      0
>1m1n_A      303      0
>1m1n_A      304      0
>1m1n_A      305      0
>1m1n_A      306      0
>1m1n_A      307      0
>1m1n_A      308      0
>1m1n_A      309      0
>1m1n_A      310      0
>1m1n_A      311      0
>1m1n_A      312      0
>1m1n_A      313      0
>1m1n_A      314      0
>1m1n_A      315      0
>1m1n_A      316      0
>1m1n_A      317      0
>1m1n_A      318      0
>1m1n_A      319      0
>1m1n_A      320      0
>1m1n_A      321      0
>1m1n_A      322      0
>1m1n_A      323      0
>1m1n_A      324      0
>1m1n_A      325      0
>1m1n_A      326      0
>1m1n_A      327      0
>1m1n_A      328      0
>1m1n_A      329      0
>1m1n_A      330      0
>1m1n_A      331      0
>1m1n_A      332      0
>1m1n_A      333      0
>1m1n_A      334      0
>1m1n_A      335      0
>1m1n_A      336      0
>1m1n_A      337      0
>1m1n_A      338      0
>1m1n_A      339      0
>1m1n_A      340      0
>1m1n_A      341      0
>1m1n_A      342      0
>1m1n_A      343      0
>1m1n_A      344      0
>1m1n_A      345      0
>1m1n_A      346      0
>1m1n_A      347      0
>1m1n_A      348      0
>1m1n_A      349      0
>1m1n_A      350      0
>1m1n_A      351      0
>1m1n_A      352      0
>1m1n_A      353      0
>1m1n_A      354      0
>1m1n_A      355      0
>1m1n_A      356      0
>1m1n_A      357      0
>1m1n_A      358      0
>1m1n_A      359      0
>1m1n_A      360      0
>1m1n_A      361      0
>1m1n_A      362      0
>1m1n_A      363      0
>1m1n_A      364      0
>1m1n_A      365      0
>1m1n_A      366      0
>1m1n_A      367      0
>1m1n_A      368      0
>1m1n_A      369      0
>1m1n_A      370      0
>1m1n_A      371      0
>1m1n_A      372      0
>1m1n_A      373      0
>1m1n_A      374      0
>1m1n_A      375      0
>1m1n_A      376      0
>1m1n_A      377      0
>1m1n_A      378      0
>1m1n_A      379      0
>1m1n_A      380      0
>1m1n_A      381      0
>1m1n_A      382      0
>1m1n_A      383      0
>1m1n_A      384      0
>1m1n_A      385      0
>1m1n_A      386      0
>1m1n_A      387      0
>1m1n_A      388      0
>1m1n_A      389      0
>1m1n_A      390      0
>1m1n_A      391      0
>1m1n_A      392      0
>1m1n_A      393      0
>1m1n_A      394      0
>1m1n_A      395      0
>1m1n_A      396      0
>1m1n_A      397      0
>1m1n_A      398      0
>1m1n_A      399      0
>1m1n_A      400      0
>1m1n_A      401      0
>1m1n_A      402      0
>1m1n_A      403      0
>1m1n_A      404      0
>1m1n_A      405      0
>1m1n_A      406      0
>1m1n_A      407      0
>1m1n_A      408      0
>1m1n_A      409      0
>1m1n_A      410      0
>1m1n_A      411      0
>1m1n_A      412      0
>1m1n_A      413      0
>1m1n_A      414      0
>1m1n_A      415      0
>1m1n_A      416      0
>1m1n_A      417      0
>1m1n_A      418      0
>1m1n_A      419      0
>1m1n_A      420      0
>1m1n_A      421      0
>1m1n_A      422      0
>1m1n_A      423      0
>1m1n_A      424      0
>1m1n_A      425      0
>1m1n_A      426      0
>1m1n_A      427      0
>1m1n_A      428      0
>1m1n_A      429      0
>1m1n_A      430      0
>1m1n_A      431      0
>1m1n_A      432      0
>1m1n_A      433      0
>1m1n_A      434      0
>1m1n_A      435      0
>1m1n_A      436      0
>1m1n_A      437      0
>1m1n_A      438      0
>1m1n_A      439      0
>1m1n_A      440      0
>1m1n_A      441      0
>1m1n_A      442      0
>1m1n_A      443      0
>1m1n_A      444      0
>1m1n_A      445      0
>1m1n_A      446      0
>1m1n_A      447      0
>1m1n_A      448      0
>1m1n_A      449      0
>1m1n_A      450      0
>1m1n_A      451      0
>1m1n_A      452      0
>1m1n_A      453      0
>1m1n_A      454      0
>1m1n_A      455      0
>1m1n_A      456      0
>1m1n_A      457      0
>1m1n_A      458      0
>1m1n_A      459      0
>1m1n_A      460      0
>1m1n_A      461      0
>1m1n_A      462      0
>1m1n_A      463      0
>1m1n_A      464      0
>1m1n_A      465      0
>1m1n_A      466      0
>1m1n_A      467      0
>1m1n_A      468      0
>1m1n_A      469      0
>1m1n_A      470      0
>1m1n_A      471      0
>1m1n_A      472      0
>1m1n_A      473      0
>1m1n_A      474      0
>1m1n_A      475      0
>1m1n_A      476      0
>1m1n_A      477      0
>1m1n_A      478      0
>1m1n_A      479      0
>1m1n_A      480      0
>1m1n_A      481      0
>1m1n_A      482      0
>1m1n_A      483      0
>1m1n_A      484      0
>1m1n_A      485      0
>1m1n_A      486      0
>1m1n_A      487      0
>1m1n_A      488      0
>1m1n_A      489      0
>1m1n_A      490      0
>1m1n_A      491      0
>3dn7_A      1      0
>3dn7_A      2      0
>3dn7_A      3      0
>3dn7_A      4      0
>3dn7_A      5      0
>3dn7_A      6      0
>3dn7_A      7      0
>3dn7_A      8      0
>3dn7_A      9      0
>3dn7_A      10      0
>3dn7_A      11      0
>3dn7_A      12      0
>3dn7_A      13      0
>3dn7_A      14      0
>3dn7_A      15      0
>3dn7_A      16      0
>3dn7_A      17      0
>3dn7_A      18      0
>3dn7_A      19      0
>3dn7_A      20      0
>3dn7_A      21      0
>3dn7_A      22      0
>3dn7_A      23      0
>3dn7_A      24      0
>3dn7_A      25      0
>3dn7_A      26      0
>3dn7_A      27      0
>3dn7_A      28      0
>3dn7_A      29      0
>3dn7_A      30      0
>3dn7_A      31      0
>3dn7_A      32      0
>3dn7_A      33      0
>3dn7_A      34      0
>3dn7_A      35      0
>3dn7_A      36      0
>3dn7_A      37      0
>3dn7_A      38      0
>3dn7_A      39      0
>3dn7_A      40      0
>3dn7_A      41      0
>3dn7_A      42      0
>3dn7_A      43      0
>3dn7_A      44      0
>3dn7_A      45      0
>3dn7_A      46      0
>3dn7_A      47      0
>3dn7_A      48      0
>3dn7_A      49      0
>3dn7_A      50      0
>3dn7_A      51      0
>3dn7_A      52      0
>3dn7_A      53      0
>3dn7_A      54      0
>3dn7_A      55      0
>3dn7_A      56      0
>3dn7_A      57      0
>3dn7_A      58      0
>3dn7_A      59      0
>3dn7_A      60      0
>3dn7_A      61      0
>3dn7_A      62      0
>3dn7_A      63      0
>3dn7_A      64      0
>3dn7_A      65      0
>3dn7_A      66      0
>3dn7_A      67      0
>3dn7_A      68      0
>3dn7_A      69      0
>3dn7_A      70      0
>3dn7_A      71      0
>3dn7_A      72      0
>3dn7_A      73      0
>3dn7_A      74      0
>3dn7_A      75      0
>3dn7_A      76      0
>3dn7_A      77      0
>3dn7_A      78      0
>3dn7_A      79      0
>3dn7_A      80      0
>3dn7_A      81      0
>3dn7_A      82      0
>3dn7_A      83      0
>3dn7_A      84      0
>3dn7_A      85      0
>3dn7_A      86      0
>3dn7_A      87      0
>3dn7_A      88      0
>3dn7_A      89      0
>3dn7_A      90      0
>3dn7_A      91      0
>3dn7_A      92      0
>3dn7_A      93      0
>3dn7_A      94      0
>3dn7_A      95      0
>3dn7_A      96      0
>3dn7_A      97      0
>3dn7_A      98      0
>3dn7_A      99      0
>3dn7_A      100      0
>3dn7_A      101      0
>3dn7_A      102      0
>3dn7_A      103      0
>3dn7_A      104      0
>3dn7_A      105      0
>3dn7_A      106      0
>3dn7_A      107      0
>3dn7_A      108      0
>3dn7_A      109      0
>3dn7_A      110      0
>3dn7_A      111      0
>3dn7_A      112      0
>3dn7_A      113      0
>3dn7_A      114      0
>3dn7_A      115      0
>3dn7_A      116      0
>3dn7_A      117      0
>3dn7_A      118      0
>3dn7_A      119      0
>3dn7_A      120      0
>3dn7_A      121      0
>3dn7_A      122      0
>3dn7_A      123      0
>3dn7_A      124      0
>3dn7_A      125      0
>3dn7_A      126      0
>3dn7_A      127      0
>3dn7_A      128      0
>3dn7_A      129      0
>3dn7_A      130      0
>3dn7_A      131      0
>3dn7_A      132      0
>3dn7_A      133      0
>3dn7_A      134      0
>3dn7_A      135      0
>3dn7_A      136      0
>3dn7_A      137      0
>3dn7_A      138      0
>3dn7_A      139      0
>3dn7_A      140      0
>3dn7_A      141      0
>3dn7_A      142      0
>3dn7_A      143      0
>3dn7_A      144      0
>3dn7_A      145      0
>3dn7_A      146      0
>3dn7_A      147      0
>3dn7_A      148      0
>3dn7_A      149      0
>3dn7_A      150      0
>3dn7_A      151      0
>3dn7_A      152      0
>3dn7_A      153      0
>3dn7_A      154      0
>3dn7_A      155      0
>3dn7_A      156      0
>3dn7_A      157      0
>3dn7_A      158      0
>3dn7_A      159      0
>3dn7_A      160      0
>3dn7_A      161      0
>3dn7_A      162      0
>3dn7_A      163      0
>3dn7_A      164      0
>3dn7_A      165      0
>3dn7_A      166      0
>3dn7_A      167      0
>3dn7_A      168      0
>3dn7_A      169      0
>3dn7_A      170      0
>3dn7_A      171      0
>3dn7_A      172      0
>3dn7_A      173      0
>3dn7_A      174      0
>3dn7_A      175      0
>3dn7_A      176      0
>3dn7_A      177      0
>3dn7_A      178      0
>3dn7_A      179      0
>3dn7_A      180      0
>3dn7_A      181      0
>3dn7_A      182      0
>3dn7_A      183      0
>3dn7_A      184      0
>3dn7_A      185      0
>3dn7_A      186      0
>3dn7_A      187      0
>3dn7_A      188      0
>3dn7_A      189      0
>3dn7_A      190      0
>3dn7_A      191      0
>3dn7_A      192      0
>3dn7_A      193      0
>3dn7_A      194      0
>DP00254      1      1
>DP00254      2      1
>DP00254      3      1
>DP00254      4      1
>DP00254      5      1
>DP00254      6      1
>DP00254      7      1
>DP00254      8      0
>DP00254      9      0
>DP00254      10      0
>DP00254      11      0
>DP00254      12      0
>DP00254      13      0
>DP00254      14      0
>DP00254      15      0
>DP00254      16      0
>DP00254      17      0
>DP00254      18      0
>DP00254      19      0
>DP00254      20      0
>DP00254      21      0
>DP00254      22      0
>DP00254      23      0
>DP00254      24      0
>DP00254      25      0
>DP00254      26      0
>DP00254      27      0
>DP00254      28      0
>DP00254      29      0
>DP00254      30      0
>DP00254      31      0
>DP00254      32      0
>DP00254      33      0
>DP00254      34      0
>DP00254      35      0
>DP00254      36      0
>DP00254      37      0
>DP00254      38      0
>DP00254      39      0
>DP00254      40      0
>DP00254      41      0
>DP00254      42      0
>DP00254      43      0
>DP00254      44      0
>DP00254      45      0
>DP00254      46      0
>DP00254      47      0
>DP00254      48      0
>DP00254      49      0
>DP00254      50      0
>DP00254      51      0
>DP00254      52      0
>DP00254      53      0
>DP00254      54      0
>DP00254      55      0
>DP00254      56      0
>DP00254      57      0
>DP00254      58      0
>DP00254      59      0
>DP00254      60      0
>DP00254      61      0
>DP00254      62      0
>DP00254      63      0
>DP00254      64      0
>DP00254      65      0
>DP00254      66      0
>DP00254      67      0
>DP00254      68      0
>DP00254      69      1
>DP00254      70      1
>DP00254      71      1
>DP00254      72      1
>DP00254      73      1
>DP00254      74      1
>DP00254      75      1
>DP00254      76      1
>DP00254      77      1
>DP00254      78      1
>DP00254      79      0
>DP00254      80      0
>DP00254      81      0
>DP00254      82      0
>DP00254      83      0
>DP00254      84      0
>DP00254      85      0
>DP00254      86      0
>DP00254      87      0
>DP00254      88      0
>DP00254      89      0
>DP00254      90      0
>DP00254      91      0
>DP00254      92      0
>DP00254      93      0
>DP00254      94      0
>DP00254      95      0
>DP00254      96      0
>DP00254      97      0
>DP00254      98      0
>DP00254      99      0
>DP00254      100      0
>DP00254      101      0
>DP00254      102      0
>DP00254      103      0
>DP00254      104      0
>DP00254      105      0
>DP00254      106      0
>DP00254      107      0
>DP00254      108      0
>DP00254      109      0
>DP00254      110      0
>DP00254      111      0
>DP00254      112      0
>DP00254      113      0
>DP00254      114      0
>DP00254      115      0
>DP00254      116      0
>DP00254      117      0
>DP00254      118      0
>DP00254      119      0
>DP00254      120      0
>DP00254      121      0
>DP00254      122      0
>DP00254      123      0
>DP00254      124      0
>DP00254      125      0
>DP00254      126      0
>DP00254      127      0
>DP00254      128      0
>DP00254      129      0
>DP00254      130      0
>DP00254      131      0
>DP00254      132      0
>DP00254      133      0
>DP00254      134      0
>DP00254      135      0
>DP00254      136      0
>DP00254      137      0
>DP00254      138      0
>DP00254      139      0
>DP00254      140      0
>DP00254      141      0
>DP00254      142      0
>DP00254      143      0
>DP00254      144      0
>DP00254      145      0
>DP00254      146      0
>DP00254      147      0
>DP00254      148      0
>DP00254      149      0
>DP00254      150      0
>DP00254      151      0
>DP00254      152      0
>DP00254      153      0
>DP00254      154      0
>DP00254      155      0
>DP00254      156      0
>DP00254      157      1
>DP00254      158      1
>DP00254      159      1
>DP00254      160      1
>DP00254      161      1
>DP00254      162      1
>DP00254      163      1
>DP00254      164      1
>DP00254      165      1
>DP00254      166      1
>DP00254      167      1
>DP00254      168      1
>DP00254      169      1
>DP00254      170      1
>DP00254      171      1
>DP00254      172      1
>DP00254      173      1
>1n9p_A      1      0
>1n9p_A      2      0
>1n9p_A      3      0
>1n9p_A      4      0
>1n9p_A      5      0
>1n9p_A      6      0
>1n9p_A      7      0
>1n9p_A      8      0
>1n9p_A      9      0
>1n9p_A      10      0
>1n9p_A      11      0
>1n9p_A      12      0
>1n9p_A      13      0
>1n9p_A      14      0
>1n9p_A      15      0
>1n9p_A      16      0
>1n9p_A      17      0
>1n9p_A      18      0
>1n9p_A      19      0
>1n9p_A      20      0
>1n9p_A      21      0
>1n9p_A      22      0
>1n9p_A      23      0
>1n9p_A      24      0
>1n9p_A      25      0
>1n9p_A      26      0
>1n9p_A      27      0
>1n9p_A      28      0
>1n9p_A      29      0
>1n9p_A      30      0
>1n9p_A      31      0
>1n9p_A      32      0
>1n9p_A      33      0
>1n9p_A      34      0
>1n9p_A      35      0
>1n9p_A      36      0
>1n9p_A      37      0
>1n9p_A      38      0
>1n9p_A      39      0
>1n9p_A      40      0
>1n9p_A      41      0
>1n9p_A      42      0
>1n9p_A      43      0
>1n9p_A      44      0
>1n9p_A      45      0
>1n9p_A      46      0
>1n9p_A      47      0
>1n9p_A      48      0
>1n9p_A      49      0
>1n9p_A      50      0
>1n9p_A      51      0
>1n9p_A      52      0
>1n9p_A      53      0
>1n9p_A      54      0
>1n9p_A      55      0
>1n9p_A      56      0
>1n9p_A      57      0
>1n9p_A      58      0
>1n9p_A      59      0
>1n9p_A      60      0
>1n9p_A      61      0
>1n9p_A      62      0
>1n9p_A      63      0
>1n9p_A      64      0
>1n9p_A      65      0
>1n9p_A      66      0
>1n9p_A      67      0
>1n9p_A      68      0
>1n9p_A      69      0
>1n9p_A      70      0
>1n9p_A      71      0
>1n9p_A      72      0
>1n9p_A      73      0
>1n9p_A      74      0
>1n9p_A      75      0
>1n9p_A      76      0
>1n9p_A      77      0
>1n9p_A      78      0
>1n9p_A      79      0
>1n9p_A      80      0
>1n9p_A      81      0
>1n9p_A      82      0
>1n9p_A      83      0
>1n9p_A      84      0
>1n9p_A      85      0
>1n9p_A      86      0
>1n9p_A      87      0
>1n9p_A      88      0
>1n9p_A      89      0
>1n9p_A      90      0
>1n9p_A      91      0
>1n9p_A      92      0
>1n9p_A      93      0
>1n9p_A      94      0
>1n9p_A      95      0
>1n9p_A      96      0
>1n9p_A      97      0
>1n9p_A      98      0
>1n9p_A      99      0
>1n9p_A      100      0
>1n9p_A      101      0
>1n9p_A      102      0
>1n9p_A      103      0
>1n9p_A      104      0
>1n9p_A      105      0
>1n9p_A      106      0
>1n9p_A      107      0
>1n9p_A      108      0
>1n9p_A      109      0
>1n9p_A      110      0
>1n9p_A      111      0
>1n9p_A      112      0
>1n9p_A      113      0
>1n9p_A      114      0
>1n9p_A      115      0
>1n9p_A      116      0
>1n9p_A      117      0
>1n9p_A      118      0
>1n9p_A      119      0
>1n9p_A      120      0
>1n9p_A      121      0
>1n9p_A      122      0
>1n9p_A      123      0
>1n9p_A      124      0
>1n9p_A      125      0
>1n9p_A      126      0
>1n9p_A      127      0
>1n9p_A      128      0
>1n9p_A      129      0
>1n9p_A      130      0
>1n9p_A      131      0
>1n9p_A      132      0
>1n9p_A      133      0
>1n9p_A      134      0
>1n9p_A      135      0
>1n9p_A      136      0
>1n9p_A      137      0
>1n9p_A      138      0
>1n9p_A      139      0
>1n9p_A      140      0
>1n9p_A      141      0
>1n9p_A      142      0
>1n9p_A      143      0
>1n9p_A      144      0
>1n9p_A      145      0
>1n9p_A      146      0
>1n9p_A      147      0
>1n9p_A      148      0
>1n9p_A      149      0
>1n9p_A      150      0
>1n9p_A      151      0
>1n9p_A      152      0
>1n9p_A      153      0
>1n9p_A      154      0
>1n9p_A      155      0
>1n9p_A      156      0
>1n9p_A      157      0
>1n9p_A      158      0
>1n9p_A      159      0
>1n9p_A      160      0
>1n9p_A      161      0
>1n9p_A      162      0
>1n9p_A      163      0
>1n9p_A      164      0
>1n9p_A      165      0
>1n9p_A      166      0
>1n9p_A      167      0
>1n9p_A      168      0
>1n9p_A      169      0
>1n9p_A      170      0
>1n9p_A      171      0
>1n9p_A      172      0
>1n9p_A      173      0
>1n9p_A      174      0
>1n9p_A      175      0
>1n9p_A      176      0
>1n9p_A      177      0
>1n9p_A      178      0
>1n9p_A      179      0
>1n9p_A      180      0
>1n9p_A      181      0
>1n9p_A      182      0
>1n9p_A      183      0
>1n9p_A      184      0
>1n9p_A      185      0
>1n9p_A      186      0
>1n9p_A      187      0
>1n9p_A      188      0
>1n9p_A      189      0
>1n9p_A      190      0
>1n9p_A      191      0
>1n9p_A      192      0
>1n9p_A      193      0
>1n9p_A      194      0
>1n9p_A      195      0
>1n9p_A      196      0
>1n9p_A      197      0
>1n9p_A      198      0
>1n9p_A      199      0
>1n9p_A      200      0
>1n9p_A      201      0
>1n9p_A      202      0
>1n9p_A      203      0
>1n9p_A      204      0
>1n9p_A      205      0
>1n9p_A      206      0
>1n9p_A      207      0
>2gtv_X      1      0
>2gtv_X      2      0
>2gtv_X      3      0
>2gtv_X      4      0
>2gtv_X      5      0
>2gtv_X      6      0
>2gtv_X      7      0
>2gtv_X      8      0
>2gtv_X      9      0
>2gtv_X      10      0
>2gtv_X      11      0
>2gtv_X      12      0
>2gtv_X      13      0
>2gtv_X      14      0
>2gtv_X      15      0
>2gtv_X      16      0
>2gtv_X      17      0
>2gtv_X      18      0
>2gtv_X      19      0
>2gtv_X      20      0
>2gtv_X      21      0
>2gtv_X      22      0
>2gtv_X      23      0
>2gtv_X      24      0
>2gtv_X      25      0
>2gtv_X      26      0
>2gtv_X      27      0
>2gtv_X      28      0
>2gtv_X      29      0
>2gtv_X      30      0
>2gtv_X      31      0
>2gtv_X      32      0
>2gtv_X      33      0
>2gtv_X      34      0
>2gtv_X      35      0
>2gtv_X      36      0
>2gtv_X      37      0
>2gtv_X      38      0
>2gtv_X      39      0
>2gtv_X      40      0
>2gtv_X      41      0
>2gtv_X      42      0
>2gtv_X      43      0
>2gtv_X      44      0
>2gtv_X      45      0
>2gtv_X      46      0
>2gtv_X      47      0
>2gtv_X      48      0
>2gtv_X      49      0
>2gtv_X      50      0
>2gtv_X      51      0
>2gtv_X      52      0
>2gtv_X      53      0
>2gtv_X      54      0
>2gtv_X      55      0
>2gtv_X      56      0
>2gtv_X      57      0
>2gtv_X      58      0
>2gtv_X      59      0
>2gtv_X      60      0
>2gtv_X      61      0
>2gtv_X      62      0
>2gtv_X      63      0
>2gtv_X      64      0
>2gtv_X      65      0
>2gtv_X      66      0
>2gtv_X      67      0
>2gtv_X      68      0
>2gtv_X      69      0
>2gtv_X      70      0
>2gtv_X      71      0
>2gtv_X      72      0
>2gtv_X      73      0
>2gtv_X      74      0
>2gtv_X      75      0
>2gtv_X      76      0
>2gtv_X      77      0
>2gtv_X      78      0
>2gtv_X      79      0
>2gtv_X      80      0
>2gtv_X      81      0
>2gtv_X      82      0
>2gtv_X      83      0
>2gtv_X      84      0
>2gtv_X      85      0
>2gtv_X      86      0
>2gtv_X      87      0
>2gtv_X      88      0
>2gtv_X      89      0
>2gtv_X      90      0
>2gtv_X      91      0
>2gtv_X      92      0
>2gtv_X      93      0
>2gtv_X      94      0
>2gtv_X      95      0
>2gtv_X      96      0
>2gtv_X      97      0
>2gtv_X      98      0
>2gtv_X      99      0
>2gtv_X      100      0
>2gtv_X      101      0
>2gtv_X      102      0
>2gtv_X      103      0
>2gtv_X      104      0
>DP00113      1      1
>DP00113      2      1
>DP00113      3      1
>DP00113      4      1
>DP00113      5      1
>DP00113      6      1
>DP00113      7      1
>DP00113      8      1
>DP00113      9      1
>DP00113      10      1
>DP00113      11      1
>DP00113      12      1
>DP00113      13      1
>DP00113      14      1
>DP00113      15      1
>DP00113      16      1
>DP00113      17      1
>DP00113      18      1
>DP00113      19      1
>DP00113      20      1
>DP00113      21      1
>DP00113      22      1
>DP00113      23      1
>DP00113      24      1
>DP00113      25      1
>DP00113      26      1
>DP00113      27      1
>DP00113      28      1
>DP00113      29      1
>DP00113      30      1
>DP00113      31      1
>DP00113      32      1
>DP00113      33      1
>DP00113      34      1
>DP00113      35      1
>DP00113      36      1
>DP00113      37      1
>DP00113      38      1
>DP00113      39      1
>DP00113      40      1
>DP00113      41      1
>DP00113      42      1
>DP00113      43      1
>DP00113      44      1
>DP00113      45      1
>DP00113      46      1
>DP00113      47      1
>DP00113      48      1
>DP00113      49      1
>DP00113      50      1
>DP00113      51      1
>DP00113      52      1
>DP00113      53      1
>DP00113      54      1
>DP00113      55      1
>DP00113      56      1
>DP00113      57      1
>DP00113      58      1
>DP00113      59      1
>DP00113      60      1
>DP00113      61      1
>DP00113      62      1
>DP00113      63      1
>DP00113      64      1
>DP00113      65      1
>DP00113      66      1
>DP00113      67      1
>DP00113      68      1
>DP00113      69      1
>DP00113      70      1
>DP00113      71      1
>DP00113      72      1
>DP00113      73      1
>DP00113      74      1
>DP00113      75      1
>DP00113      76      1
>DP00113      77      1
>DP00113      78      1
>DP00113      79      1
>DP00113      80      1
>DP00113      81      1
>DP00113      82      1
>DP00113      83      1
>DP00113      84      1
>DP00113      85      1
>DP00113      86      1
>DP00113      87      1
>DP00113      88      1
>DP00113      89      1
>DP00113      90      1
>DP00113      91      1
>DP00113      92      1
>DP00113      93      1
>DP00113      94      0
>DP00113      95      0
>DP00113      96      0
>DP00113      97      0
>DP00113      98      0
>DP00113      99      0
>DP00113      100      0
>DP00113      101      0
>DP00113      102      0
>DP00113      103      0
>DP00113      104      0
>DP00113      105      0
>DP00113      106      0
>DP00113      107      0
>DP00113      108      0
>DP00113      109      0
>DP00113      110      0
>DP00113      111      0
>DP00113      112      0
>DP00113      113      0
>DP00113      114      0
>DP00113      115      0
>DP00113      116      0
>DP00113      117      0
>DP00561      1      0
>DP00561      2      0
>DP00561      3      0
>DP00561      4      0
>DP00561      5      0
>DP00561      6      0
>DP00561      7      0
>DP00561      8      0
>DP00561      9      0
>DP00561      10      0
>DP00561      11      0
>DP00561      12      0
>DP00561      13      0
>DP00561      14      0
>DP00561      15      0
>DP00561      16      0
>DP00561      17      0
>DP00561      18      0
>DP00561      19      0
>DP00561      20      0
>DP00561      21      0
>DP00561      22      0
>DP00561      23      0
>DP00561      24      0
>DP00561      25      0
>DP00561      26      0
>DP00561      27      0
>DP00561      28      0
>DP00561      29      0
>DP00561      30      0
>DP00561      31      0
>DP00561      32      0
>DP00561      33      0
>DP00561      34      0
>DP00561      35      0
>DP00561      36      0
>DP00561      37      0
>DP00561      38      0
>DP00561      39      0
>DP00561      40      0
>DP00561      41      0
>DP00561      42      0
>DP00561      43      0
>DP00561      44      0
>DP00561      45      0
>DP00561      46      0
>DP00561      47      0
>DP00561      48      0
>DP00561      49      0
>DP00561      50      0
>DP00561      51      0
>DP00561      52      0
>DP00561      53      0
>DP00561      54      0
>DP00561      55      0
>DP00561      56      0
>DP00561      57      0
>DP00561      58      0
>DP00561      59      0
>DP00561      60      0
>DP00561      61      0
>DP00561      62      0
>DP00561      63      0
>DP00561      64      0
>DP00561      65      0
>DP00561      66      0
>DP00561      67      0
>DP00561      68      0
>DP00561      69      0
>DP00561      70      0
>DP00561      71      0
>DP00561      72      0
>DP00561      73      0
>DP00561      74      0
>DP00561      75      0
>DP00561      76      0
>DP00561      77      0
>DP00561      78      0
>DP00561      79      0
>DP00561      80      0
>DP00561      81      0
>DP00561      82      0
>DP00561      83      0
>DP00561      84      0
>DP00561      85      0
>DP00561      86      0
>DP00561      87      0
>DP00561      88      0
>DP00561      89      0
>DP00561      90      0
>DP00561      91      0
>DP00561      92      0
>DP00561      93      0
>DP00561      94      0
>DP00561      95      0
>DP00561      96      0
>DP00561      97      0
>DP00561      98      0
>DP00561      99      0
>DP00561      100      0
>DP00561      101      0
>DP00561      102      0
>DP00561      103      0
>DP00561      104      0
>DP00561      105      0
>DP00561      106      0
>DP00561      107      0
>DP00561      108      0
>DP00561      109      0
>DP00561      110      0
>DP00561      111      0
>DP00561      112      0
>DP00561      113      0
>DP00561      114      0
>DP00561      115      0
>DP00561      116      0
>DP00561      117      0
>DP00561      118      0
>DP00561      119      0
>DP00561      120      0
>DP00561      121      0
>DP00561      122      0
>DP00561      123      0
>DP00561      124      0
>DP00561      125      0
>DP00561      126      0
>DP00561      127      0
>DP00561      128      0
>DP00561      129      0
>DP00561      130      0
>DP00561      131      0
>DP00561      132      0
>DP00561      133      0
>DP00561      134      0
>DP00561      135      0
>DP00561      136      0
>DP00561      137      0
>DP00561      138      0
>DP00561      139      0
>DP00561      140      0
>DP00561      141      0
>DP00561      142      0
>DP00561      143      0
>DP00561      144      0
>DP00561      145      0
>DP00561      146      0
>DP00561      147      0
>DP00561      148      0
>DP00561      149      0
>DP00561      150      0
>DP00561      151      0
>DP00561      152      0
>DP00561      153      0
>DP00561      154      0
>DP00561      155      0
>DP00561      156      0
>DP00561      157      0
>DP00561      158      0
>DP00561      159      0
>DP00561      160      0
>DP00561      161      0
>DP00561      162      0
>DP00561      163      0
>DP00561      164      0
>DP00561      165      0
>DP00561      166      0
>DP00561      167      0
>DP00561      168      0
>DP00561      169      0
>DP00561      170      0
>DP00561      171      0
>DP00561      172      0
>DP00561      173      0
>DP00561      174      0
>DP00561      175      0
>DP00561      176      0
>DP00561      177      0
>DP00561      178      0
>DP00561      179      0
>DP00561      180      0
>DP00561      181      0
>DP00561      182      0
>DP00561      183      0
>DP00561      184      0
>DP00561      185      0
>DP00561      186      0
>DP00561      187      0
>DP00561      188      0
>DP00561      189      0
>DP00561      190      0
>DP00561      191      0
>DP00561      192      0
>DP00561      193      0
>DP00561      194      0
>DP00561      195      0
>DP00561      196      0
>DP00561      197      0
>DP00561      198      0
>DP00561      199      0
>DP00561      200      0
>DP00561      201      0
>DP00561      202      0
>DP00561      203      0
>DP00561      204      0
>DP00561      205      0
>DP00561      206      0
>DP00561      207      0
>DP00561      208      0
>DP00561      209      0
>DP00561      210      0
>DP00561      211      0
>DP00561      212      0
>DP00561      213      0
>DP00561      214      0
>DP00561      215      0
>DP00561      216      0
>DP00561      217      0
>DP00561      218      0
>DP00561      219      0
>DP00561      220      0
>DP00561      221      0
>DP00561      222      0
>DP00561      223      0
>DP00561      224      0
>DP00561      225      0
>DP00561      226      0
>DP00561      227      0
>DP00561      228      0
>DP00561      229      0
>DP00561      230      0
>DP00561      231      0
>DP00561      232      0
>DP00561      233      0
>DP00561      234      0
>DP00561      235      0
>DP00561      236      0
>DP00561      237      0
>DP00561      238      0
>DP00561      239      0
>DP00561      240      0
>DP00561      241      0
>DP00561      242      0
>DP00561      243      0
>DP00561      244      0
>DP00561      245      0
>DP00561      246      0
>DP00561      247      0
>DP00561      248      0
>DP00561      249      0
>DP00561      250      0
>DP00561      251      0
>DP00561      252      0
>DP00561      253      0
>DP00561      254      0
>DP00561      255      0
>DP00561      256      0
>DP00561      257      0
>DP00561      258      0
>DP00561      259      0
>DP00561      260      0
>DP00561      261      0
>DP00561      262      0
>DP00561      263      0
>DP00561      264      0
>DP00561      265      0
>DP00561      266      0
>DP00561      267      0
>DP00561      268      0
>DP00561      269      0
>DP00561      270      0
>DP00561      271      0
>DP00561      272      0
>DP00561      273      0
>DP00561      274      0
>DP00561      275      0
>DP00561      276      0
>DP00561      277      0
>DP00561      278      0
>DP00561      279      0
>DP00561      280      0
>DP00561      281      0
>DP00561      282      0
>DP00561      283      0
>DP00561      284      0
>DP00561      285      0
>DP00561      286      0
>DP00561      287      0
>DP00561      288      0
>DP00561      289      0
>DP00561      290      0
>DP00561      291      0
>DP00561      292      0
>DP00561      293      0
>DP00561      294      0
>DP00561      295      0
>DP00561      296      0
>DP00561      297      0
>DP00561      298      0
>DP00561      299      0
>DP00561      300      0
>DP00561      301      0
>DP00561      302      0
>DP00561      303      0
>DP00561      304      0
>DP00561      305      0
>DP00561      306      0
>DP00561      307      0
>DP00561      308      0
>DP00561      309      0
>DP00561      310      0
>DP00561      311      0
>DP00561      312      0
>DP00561      313      0
>DP00561      314      0
>DP00561      315      0
>DP00561      316      0
>DP00561      317      0
>DP00561      318      0
>DP00561      319      0
>DP00561      320      0
>DP00561      321      0
>DP00561      322      0
>DP00561      323      0
>DP00561      324      0
>DP00561      325      0
>DP00561      326      0
>DP00561      327      0
>DP00561      328      0
>DP00561      329      1
>DP00561      330      1
>DP00561      331      1
>DP00561      332      1
>DP00561      333      1
>DP00561      334      1
>DP00561      335      1
>DP00561      336      1
>DP00561      337      1
>DP00561      338      1
>DP00561      339      1
>DP00561      340      1
>DP00561      341      1
>DP00561      342      1
>DP00561      343      0
>DP00561      344      0
>DP00561      345      0
>DP00561      346      0
>DP00561      347      0
>DP00561      348      0
>DP00561      349      0
>DP00561      350      0
>DP00561      351      0
>DP00561      352      0
>DP00561      353      0
>DP00561      354      0
>DP00561      355      0
>DP00561      356      0
>DP00561      357      0
>DP00561      358      0
>DP00561      359      0
>DP00561      360      0
>DP00561      361      0
>DP00561      362      0
>DP00561      363      0
>DP00561      364      0
>DP00561      365      0
>DP00561      366      1
>DP00561      367      1
>DP00561      368      1
>DP00561      369      1
>DP00561      370      1
>DP00561      371      1
>DP00561      372      1
>DP00561      373      0
>DP00561      374      0
>DP00561      375      0
>DP00561      376      0
>DP00561      377      0
>DP00561      378      0
>DP00561      379      0
>DP00561      380      0
>DP00561      381      0
>DP00561      382      0
>DP00561      383      0
>DP00561      384      0
>DP00561      385      0
>DP00561      386      0
>DP00561      387      0
>DP00561      388      0
>DP00561      389      0
>DP00561      390      0
>DP00561      391      0
>DP00561      392      0
>DP00561      393      0
>DP00561      394      0
>DP00561      395      0
>DP00561      396      0
>DP00561      397      0
>DP00561      398      0
>DP00561      399      0
>DP00561      400      0
>DP00561      401      0
>DP00561      402      0
>DP00561      403      0
>DP00561      404      0
>DP00561      405      0
>DP00561      406      0
>DP00561      407      0
>DP00561      408      0
>DP00561      409      0
>DP00561      410      0
>DP00561      411      0
>DP00561      412      0
>DP00561      413      0
>DP00561      414      0
>DP00561      415      0
>DP00561      416      0
>DP00561      417      0
>DP00561      418      0
>DP00561      419      0
>DP00561      420      0
>DP00561      421      0
>DP00561      422      0
>DP00561      423      0
>DP00561      424      0
>DP00561      425      0
>DP00561      426      0
>DP00561      427      0
>DP00561      428      0
>DP00561      429      0
>DP00561      430      0
>DP00561      431      0
>DP00561      432      0
>DP00561      433      0
>DP00561      434      0
>DP00561      435      0
>DP00561      436      0
>DP00561      437      0
>DP00561      438      0
>DP00561      439      0
>DP00561      440      0
>DP00561      441      0
>DP00561      442      0
>DP00561      443      0
>DP00561      444      0
>DP00561      445      0
>DP00561      446      0
>DP00561      447      0
>DP00561      448      0
>DP00561      449      0
>DP00561      450      0
>DP00561      451      0
>DP00561      452      0
>DP00561      453      0
>DP00561      454      0
>DP00561      455      0
>DP00561      456      0
>DP00561      457      0
>DP00561      458      0
>DP00561      459      0
>DP00561      460      0
>DP00561      461      0
>DP00561      462      0
>DP00561      463      0
>DP00561      464      0
>DP00561      465      0
>DP00561      466      0
>DP00561      467      0
>DP00561      468      0
>DP00561      469      0
>DP00561      470      0
>DP00561      471      0
>DP00561      472      0
>DP00561      473      0
>DP00561      474      0
>DP00561      475      0
>DP00561      476      0
>DP00561      477      0
>DP00561      478      0
>DP00561      479      0
>DP00561      480      0
>DP00561      481      0
>DP00561      482      0
>DP00561      483      0
>DP00561      484      0
>DP00561      485      0
>DP00561      486      0
>DP00561      487      0
>DP00561      488      0
>DP00561      489      0
>DP00561      490      0
>DP00561      491      0
>DP00561      492      0
>DP00561      493      0
>DP00561      494      0
>DP00561      495      0
>DP00561      496      0
>DP00561      497      0
>DP00561      498      0
>DP00561      499      0
>DP00561      500      0
>DP00561      501      0
>DP00561      502      0
>DP00561      503      0
>DP00561      504      0
>DP00561      505      0
>DP00561      506      0
>DP00561      507      0
>DP00561      508      0
>1wrg_A      1      0
>1wrg_A      2      0
>1wrg_A      3      0
>1wrg_A      4      0
>1wrg_A      5      0
>1wrg_A      6      0
>1wrg_A      7      0
>1wrg_A      8      0
>1wrg_A      9      0
>1wrg_A      10      0
>1wrg_A      11      0
>1wrg_A      12      0
>1wrg_A      13      0
>1wrg_A      14      0
>1wrg_A      15      0
>1wrg_A      16      0
>1wrg_A      17      0
>1wrg_A      18      0
>1wrg_A      19      0
>1wrg_A      20      0
>1wrg_A      21      0
>1wrg_A      22      0
>1wrg_A      23      0
>1wrg_A      24      0
>1wrg_A      25      0
>1wrg_A      26      0
>1wrg_A      27      0
>1wrg_A      28      0
>1wrg_A      29      0
>1wrg_A      30      0
>1wrg_A      31      0
>1wrg_A      32      0
>1wrg_A      33      0
>1wrg_A      34      0
>1wrg_A      35      0
>1wrg_A      36      0
>1wrg_A      37      0
>1wrg_A      38      0
>1wrg_A      39      0
>1wrg_A      40      0
>1wrg_A      41      0
>1wrg_A      42      0
>1wrg_A      43      0
>1wrg_A      44      0
>1wrg_A      45      0
>1wrg_A      46      0
>1wrg_A      47      0
>1wrg_A      48      0
>1wrg_A      49      0
>1wrg_A      50      0
>1wrg_A      51      0
>1wrg_A      52      0
>1wrg_A      53      0
>1wrg_A      54      0
>1wrg_A      55      0
>DP00120      1      0
>DP00120      2      0
>DP00120      3      0
>DP00120      4      0
>DP00120      5      0
>DP00120      6      0
>DP00120      7      0
>DP00120      8      0
>DP00120      9      0
>DP00120      10      0
>DP00120      11      0
>DP00120      12      0
>DP00120      13      0
>DP00120      14      0
>DP00120      15      0
>DP00120      16      0
>DP00120      17      0
>DP00120      18      0
>DP00120      19      0
>DP00120      20      0
>DP00120      21      0
>DP00120      22      0
>DP00120      23      0
>DP00120      24      0
>DP00120      25      0
>DP00120      26      0
>DP00120      27      0
>DP00120      28      0
>DP00120      29      0
>DP00120      30      0
>DP00120      31      0
>DP00120      32      0
>DP00120      33      0
>DP00120      34      0
>DP00120      35      0
>DP00120      36      0
>DP00120      37      0
>DP00120      38      0
>DP00120      39      0
>DP00120      40      0
>DP00120      41      0
>DP00120      42      0
>DP00120      43      0
>DP00120      44      0
>DP00120      45      0
>DP00120      46      0
>DP00120      47      0
>DP00120      48      0
>DP00120      49      0
>DP00120      50      0
>DP00120      51      0
>DP00120      52      0
>DP00120      53      0
>DP00120      54      0
>DP00120      55      0
>DP00120      56      0
>DP00120      57      0
>DP00120      58      0
>DP00120      59      0
>DP00120      60      0
>DP00120      61      0
>DP00120      62      0
>DP00120      63      0
>DP00120      64      0
>DP00120      65      0
>DP00120      66      0
>DP00120      67      0
>DP00120      68      0
>DP00120      69      0
>DP00120      70      0
>DP00120      71      0
>DP00120      72      0
>DP00120      73      0
>DP00120      74      0
>DP00120      75      0
>DP00120      76      0
>DP00120      77      0
>DP00120      78      0
>DP00120      79      0
>DP00120      80      0
>DP00120      81      0
>DP00120      82      0
>DP00120      83      0
>DP00120      84      0
>DP00120      85      0
>DP00120      86      0
>DP00120      87      0
>DP00120      88      0
>DP00120      89      0
>DP00120      90      0
>DP00120      91      0
>DP00120      92      0
>DP00120      93      0
>DP00120      94      0
>DP00120      95      0
>DP00120      96      0
>DP00120      97      0
>DP00120      98      0
>DP00120      99      0
>DP00120      100      0
>DP00120      101      0
>DP00120      102      0
>DP00120      103      0
>DP00120      104      0
>DP00120      105      0
>DP00120      106      0
>DP00120      107      0
>DP00120      108      0
>DP00120      109      0
>DP00120      110      0
>DP00120      111      0
>DP00120      112      0
>DP00120      113      0
>DP00120      114      0
>DP00120      115      0
>DP00120      116      0
>DP00120      117      0
>DP00120      118      0
>DP00120      119      0
>DP00120      120      0
>DP00120      121      0
>DP00120      122      0
>DP00120      123      0
>DP00120      124      0
>DP00120      125      0
>DP00120      126      0
>DP00120      127      0
>DP00120      128      0
>DP00120      129      0
>DP00120      130      0
>DP00120      131      0
>DP00120      132      0
>DP00120      133      0
>DP00120      134      0
>DP00120      135      0
>DP00120      136      0
>DP00120      137      0
>DP00120      138      0
>DP00120      139      0
>DP00120      140      0
>DP00120      141      0
>DP00120      142      0
>DP00120      143      0
>DP00120      144      0
>DP00120      145      0
>DP00120      146      0
>DP00120      147      0
>DP00120      148      0
>DP00120      149      0
>DP00120      150      0
>DP00120      151      0
>DP00120      152      0
>DP00120      153      0
>DP00120      154      0
>DP00120      155      0
>DP00120      156      0
>DP00120      157      0
>DP00120      158      0
>DP00120      159      0
>DP00120      160      0
>DP00120      161      0
>DP00120      162      0
>DP00120      163      0
>DP00120      164      0
>DP00120      165      0
>DP00120      166      0
>DP00120      167      0
>DP00120      168      0
>DP00120      169      0
>DP00120      170      0
>DP00120      171      0
>DP00120      172      0
>DP00120      173      0
>DP00120      174      0
>DP00120      175      0
>DP00120      176      0
>DP00120      177      0
>DP00120      178      0
>DP00120      179      0
>DP00120      180      0
>DP00120      181      0
>DP00120      182      0
>DP00120      183      0
>DP00120      184      0
>DP00120      185      0
>DP00120      186      0
>DP00120      187      0
>DP00120      188      0
>DP00120      189      0
>DP00120      190      0
>DP00120      191      0
>DP00120      192      0
>DP00120      193      0
>DP00120      194      0
>DP00120      195      0
>DP00120      196      0
>DP00120      197      0
>DP00120      198      0
>DP00120      199      0
>DP00120      200      0
>DP00120      201      0
>DP00120      202      0
>DP00120      203      0
>DP00120      204      0
>DP00120      205      0
>DP00120      206      0
>DP00120      207      0
>DP00120      208      0
>DP00120      209      0
>DP00120      210      0
>DP00120      211      0
>DP00120      212      0
>DP00120      213      0
>DP00120      214      0
>DP00120      215      0
>DP00120      216      0
>DP00120      217      0
>DP00120      218      0
>DP00120      219      0
>DP00120      220      0
>DP00120      221      0
>DP00120      222      0
>DP00120      223      0
>DP00120      224      0
>DP00120      225      0
>DP00120      226      0
>DP00120      227      0
>DP00120      228      0
>DP00120      229      0
>DP00120      230      0
>DP00120      231      0
>DP00120      232      0
>DP00120      233      0
>DP00120      234      0
>DP00120      235      0
>DP00120      236      0
>DP00120      237      0
>DP00120      238      0
>DP00120      239      0
>DP00120      240      0
>DP00120      241      0
>DP00120      242      0
>DP00120      243      0
>DP00120      244      0
>DP00120      245      0
>DP00120      246      0
>DP00120      247      0
>DP00120      248      0
>DP00120      249      0
>DP00120      250      0
>DP00120      251      0
>DP00120      252      0
>DP00120      253      0
>DP00120      254      0
>DP00120      255      0
>DP00120      256      0
>DP00120      257      0
>DP00120      258      0
>DP00120      259      0
>DP00120      260      0
>DP00120      261      0
>DP00120      262      0
>DP00120      263      0
>DP00120      264      0
>DP00120      265      0
>DP00120      266      0
>DP00120      267      0
>DP00120      268      0
>DP00120      269      0
>DP00120      270      0
>DP00120      271      0
>DP00120      272      0
>DP00120      273      0
>DP00120      274      0
>DP00120      275      0
>DP00120      276      0
>DP00120      277      0
>DP00120      278      0
>DP00120      279      0
>DP00120      280      0
>DP00120      281      0
>DP00120      282      0
>DP00120      283      0
>DP00120      284      0
>DP00120      285      0
>DP00120      286      0
>DP00120      287      0
>DP00120      288      0
>DP00120      289      0
>DP00120      290      0
>DP00120      291      0
>DP00120      292      0
>DP00120      293      0
>DP00120      294      0
>DP00120      295      0
>DP00120      296      0
>DP00120      297      0
>DP00120      298      0
>DP00120      299      0
>DP00120      300      0
>DP00120      301      0
>DP00120      302      0
>DP00120      303      0
>DP00120      304      0
>DP00120      305      0
>DP00120      306      0
>DP00120      307      0
>DP00120      308      0
>DP00120      309      0
>DP00120      310      0
>DP00120      311      0
>DP00120      312      0
>DP00120      313      0
>DP00120      314      0
>DP00120      315      0
>DP00120      316      0
>DP00120      317      0
>DP00120      318      0
>DP00120      319      0
>DP00120      320      0
>DP00120      321      0
>DP00120      322      0
>DP00120      323      0
>DP00120      324      0
>DP00120      325      0
>DP00120      326      0
>DP00120      327      0
>DP00120      328      0
>DP00120      329      0
>DP00120      330      0
>DP00120      331      0
>DP00120      332      0
>DP00120      333      0
>DP00120      334      0
>DP00120      335      0
>DP00120      336      0
>DP00120      337      0
>DP00120      338      0
>DP00120      339      0
>DP00120      340      0
>DP00120      341      0
>DP00120      342      0
>DP00120      343      0
>DP00120      344      0
>DP00120      345      0
>DP00120      346      0
>DP00120      347      0
>DP00120      348      0
>DP00120      349      0
>DP00120      350      0
>DP00120      351      0
>DP00120      352      0
>DP00120      353      0
>DP00120      354      0
>DP00120      355      0
>DP00120      356      0
>DP00120      357      0
>DP00120      358      0
>DP00120      359      0
>DP00120      360      0
>DP00120      361      0
>DP00120      362      0
>DP00120      363      0
>DP00120      364      0
>DP00120      365      0
>DP00120      366      0
>DP00120      367      0
>DP00120      368      0
>DP00120      369      0
>DP00120      370      0
>DP00120      371      0
>DP00120      372      0
>DP00120      373      0
>DP00120      374      0
>DP00120      375      0
>DP00120      376      0
>DP00120      377      0
>DP00120      378      0
>DP00120      379      0
>DP00120      380      0
>DP00120      381      0
>DP00120      382      0
>DP00120      383      0
>DP00120      384      0
>DP00120      385      0
>DP00120      386      0
>DP00120      387      0
>DP00120      388      0
>DP00120      389      0
>DP00120      390      0
>DP00120      391      0
>DP00120      392      0
>DP00120      393      0
>DP00120      394      0
>DP00120      395      0
>DP00120      396      0
>DP00120      397      0
>DP00120      398      0
>DP00120      399      0
>DP00120      400      0
>DP00120      401      0
>DP00120      402      0
>DP00120      403      0
>DP00120      404      0
>DP00120      405      0
>DP00120      406      0
>DP00120      407      0
>DP00120      408      0
>DP00120      409      0
>DP00120      410      0
>DP00120      411      0
>DP00120      412      0
>DP00120      413      0
>DP00120      414      0
>DP00120      415      0
>DP00120      416      0
>DP00120      417      0
>DP00120      418      0
>DP00120      419      0
>DP00120      420      0
>DP00120      421      0
>DP00120      422      0
>DP00120      423      0
>DP00120      424      0
>DP00120      425      0
>DP00120      426      0
>DP00120      427      0
>DP00120      428      0
>DP00120      429      0
>DP00120      430      0
>DP00120      431      0
>DP00120      432      0
>DP00120      433      0
>DP00120      434      0
>DP00120      435      0
>DP00120      436      0
>DP00120      437      0
>DP00120      438      0
>DP00120      439      0
>DP00120      440      0
>DP00120      441      0
>DP00120      442      0
>DP00120      443      0
>DP00120      444      0
>DP00120      445      0
>DP00120      446      0
>DP00120      447      0
>DP00120      448      0
>DP00120      449      0
>DP00120      450      0
>DP00120      451      0
>DP00120      452      0
>DP00120      453      0
>DP00120      454      0
>DP00120      455      0
>DP00120      456      0
>DP00120      457      0
>DP00120      458      0
>DP00120      459      0
>DP00120      460      0
>DP00120      461      0
>DP00120      462      0
>DP00120      463      0
>DP00120      464      0
>DP00120      465      0
>DP00120      466      0
>DP00120      467      0
>DP00120      468      0
>DP00120      469      0
>DP00120      470      0
>DP00120      471      0
>DP00120      472      0
>DP00120      473      0
>DP00120      474      0
>DP00120      475      0
>DP00120      476      0
>DP00120      477      0
>DP00120      478      0
>DP00120      479      0
>DP00120      480      0
>DP00120      481      0
>DP00120      482      0
>DP00120      483      0
>DP00120      484      0
>DP00120      485      0
>DP00120      486      0
>DP00120      487      0
>DP00120      488      0
>DP00120      489      0
>DP00120      490      0
>DP00120      491      0
>DP00120      492      0
>DP00120      493      0
>DP00120      494      0
>DP00120      495      0
>DP00120      496      0
>DP00120      497      0
>DP00120      498      0
>DP00120      499      0
>DP00120      500      0
>DP00120      501      0
>DP00120      502      0
>DP00120      503      0
>DP00120      504      0
>DP00120      505      0
>DP00120      506      0
>DP00120      507      0
>DP00120      508      0
>DP00120      509      0
>DP00120      510      0
>DP00120      511      0
>DP00120      512      0
>DP00120      513      0
>DP00120      514      0
>DP00120      515      0
>DP00120      516      0
>DP00120      517      0
>DP00120      518      0
>DP00120      519      0
>DP00120      520      0
>DP00120      521      0
>DP00120      522      0
>DP00120      523      0
>DP00120      524      0
>DP00120      525      0
>DP00120      526      0
>DP00120      527      0
>DP00120      528      0
>DP00120      529      0
>DP00120      530      0
>DP00120      531      0
>DP00120      532      0
>DP00120      533      0
>DP00120      534      0
>DP00120      535      0
>DP00120      536      0
>DP00120      537      0
>DP00120      538      0
>DP00120      539      0
>DP00120      540      0
>DP00120      541      0
>DP00120      542      0
>DP00120      543      0
>DP00120      544      0
>DP00120      545      0
>DP00120      546      0
>DP00120      547      0
>DP00120      548      0
>DP00120      549      0
>DP00120      550      0
>DP00120      551      0
>DP00120      552      0
>DP00120      553      0
>DP00120      554      0
>DP00120      555      0
>DP00120      556      0
>DP00120      557      0
>DP00120      558      0
>DP00120      559      0
>DP00120      560      0
>DP00120      561      0
>DP00120      562      0
>DP00120      563      0
>DP00120      564      0
>DP00120      565      0
>DP00120      566      0
>DP00120      567      0
>DP00120      568      0
>DP00120      569      0
>DP00120      570      0
>DP00120      571      0
>DP00120      572      0
>DP00120      573      0
>DP00120      574      0
>DP00120      575      0
>DP00120      576      0
>DP00120      577      0
>DP00120      578      0
>DP00120      579      0
>DP00120      580      0
>DP00120      581      0
>DP00120      582      0
>DP00120      583      0
>DP00120      584      0
>DP00120      585      0
>DP00120      586      0
>DP00120      587      0
>DP00120      588      0
>DP00120      589      0
>DP00120      590      0
>DP00120      591      0
>DP00120      592      0
>DP00120      593      0
>DP00120      594      0
>DP00120      595      0
>DP00120      596      0
>DP00120      597      0
>DP00120      598      0
>DP00120      599      0
>DP00120      600      0
>DP00120      601      0
>DP00120      602      0
>DP00120      603      0
>DP00120      604      0
>DP00120      605      0
>DP00120      606      0
>DP00120      607      0
>DP00120      608      0
>DP00120      609      0
>DP00120      610      0
>DP00120      611      0
>DP00120      612      0
>DP00120      613      0
>DP00120      614      0
>DP00120      615      0
>DP00120      616      0
>DP00120      617      0
>DP00120      618      0
>DP00120      619      0
>DP00120      620      0
>DP00120      621      0
>DP00120      622      0
>DP00120      623      0
>DP00120      624      0
>DP00120      625      0
>DP00120      626      0
>DP00120      627      0
>DP00120      628      0
>DP00120      629      0
>DP00120      630      0
>DP00120      631      0
>DP00120      632      0
>DP00120      633      0
>DP00120      634      0
>DP00120      635      0
>DP00120      636      1
>DP00120      637      1
>DP00120      638      1
>DP00120      639      1
>DP00120      640      1
>DP00120      641      1
>DP00120      642      1
>DP00120      643      1
>DP00120      644      1
>DP00120      645      1
>DP00120      646      1
>DP00120      647      1
>DP00120      648      1
>DP00120      649      1
>DP00120      650      1
>DP00120      651      1
>DP00120      652      1
>DP00120      653      1
>DP00120      654      1
>DP00120      655      1
>DP00120      656      1
>DP00120      657      1
>DP00120      658      1
>DP00120      659      1
>DP00120      660      1
>DP00120      661      1
>DP00120      662      1
>DP00120      663      1
>DP00120      664      1
>DP00120      665      1
>DP00120      666      1
>DP00120      667      1
>DP00120      668      1
>DP00120      669      1
>DP00120      670      1
>DP00120      671      1
>DP00120      672      1
>DP00120      673      1
>DP00120      674      1
>DP00120      675      1
>DP00120      676      1
>DP00120      677      1
>DP00120      678      1
>DP00120      679      1
>DP00120      680      1
>DP00120      681      1
>DP00120      682      1
>DP00120      683      1
>DP00120      684      1
>DP00120      685      1
>DP00120      686      1
>DP00120      687      1
>DP00120      688      1
>DP00120      689      1
>DP00120      690      1
>DP00120      691      1
>DP00120      692      1
>DP00120      693      1
>DP00120      694      1
>DP00120      695      1
>DP00120      696      1
>DP00120      697      1
>DP00120      698      1
>DP00120      699      1
>DP00120      700      1
>DP00120      701      1
>DP00120      702      1
>DP00120      703      1
>DP00120      704      1
>DP00120      705      1
>DP00120      706      1
>DP00120      707      1
>DP00120      708      1
>DP00120      709      1
>DP00120      710      1
>DP00120      711      1
>DP00120      712      1
>DP00120      713      1
>DP00120      714      1
>DP00120      715      1
>DP00120      716      1
>DP00120      717      1
>DP00120      718      1
>DP00120      719      1
>DP00120      720      1
>DP00120      721      1
>DP00120      722      1
>DP00120      723      1
>DP00120      724      1
>DP00120      725      1
>DP00120      726      1
>DP00120      727      1
>DP00120      728      1
>DP00120      729      1
>DP00120      730      1
>DP00120      731      1
>DP00120      732      1
>DP00120      733      1
>DP00120      734      1
>DP00120      735      1
>DP00120      736      1
>DP00120      737      1
>DP00120      738      1
>DP00120      739      1
>DP00120      740      1
>DP00120      741      1
>DP00120      742      1
>DP00120      743      1
>DP00120      744      1
>DP00120      745      1
>DP00120      746      1
>DP00120      747      1
>DP00120      748      1
>DP00120      749      1
>DP00120      750      1
>DP00120      751      1
>DP00120      752      1
>DP00120      753      1
>DP00120      754      1
>DP00120      755      1
>DP00120      756      1
>DP00120      757      1
>DP00120      758      1
>DP00120      759      1
>DP00120      760      1
>DP00120      761      1
>DP00120      762      1
>DP00120      763      1
>DP00120      764      1
>DP00120      765      1
>DP00120      766      1
>DP00120      767      1
>DP00120      768      1
>DP00120      769      1
>DP00120      770      1
>DP00120      771      1
>DP00389      1      0
>DP00389      2      0
>DP00389      3      0
>DP00389      4      0
>DP00389      5      0
>DP00389      6      0
>DP00389      7      0
>DP00389      8      0
>DP00389      9      0
>DP00389      10      0
>DP00389      11      0
>DP00389      12      0
>DP00389      13      0
>DP00389      14      0
>DP00389      15      0
>DP00389      16      0
>DP00389      17      0
>DP00389      18      0
>DP00389      19      0
>DP00389      20      0
>DP00389      21      0
>DP00389      22      0
>DP00389      23      0
>DP00389      24      0
>DP00389      25      0
>DP00389      26      0
>DP00389      27      0
>DP00389      28      0
>DP00389      29      0
>DP00389      30      0
>DP00389      31      0
>DP00389      32      0
>DP00389      33      0
>DP00389      34      0
>DP00389      35      0
>DP00389      36      0
>DP00389      37      0
>DP00389      38      0
>DP00389      39      0
>DP00389      40      0
>DP00389      41      0
>DP00389      42      0
>DP00389      43      0
>DP00389      44      0
>DP00389      45      0
>DP00389      46      0
>DP00389      47      0
>DP00389      48      0
>DP00389      49      0
>DP00389      50      0
>DP00389      51      0
>DP00389      52      0
>DP00389      53      0
>DP00389      54      0
>DP00389      55      0
>DP00389      56      0
>DP00389      57      0
>DP00389      58      0
>DP00389      59      0
>DP00389      60      0
>DP00389      61      0
>DP00389      62      0
>DP00389      63      0
>DP00389      64      0
>DP00389      65      0
>DP00389      66      0
>DP00389      67      0
>DP00389      68      0
>DP00389      69      0
>DP00389      70      0
>DP00389      71      0
>DP00389      72      0
>DP00389      73      0
>DP00389      74      0
>DP00389      75      0
>DP00389      76      0
>DP00389      77      0
>DP00389      78      0
>DP00389      79      0
>DP00389      80      0
>DP00389      81      0
>DP00389      82      0
>DP00389      83      0
>DP00389      84      0
>DP00389      85      0
>DP00389      86      0
>DP00389      87      0
>DP00389      88      0
>DP00389      89      0
>DP00389      90      0
>DP00389      91      0
>DP00389      92      0
>DP00389      93      0
>DP00389      94      0
>DP00389      95      0
>DP00389      96      0
>DP00389      97      0
>DP00389      98      0
>DP00389      99      0
>DP00389      100      0
>DP00389      101      0
>DP00389      102      0
>DP00389      103      0
>DP00389      104      0
>DP00389      105      0
>DP00389      106      0
>DP00389      107      0
>DP00389      108      0
>DP00389      109      0
>DP00389      110      0
>DP00389      111      0
>DP00389      112      0
>DP00389      113      0
>DP00389      114      0
>DP00389      115      0
>DP00389      116      0
>DP00389      117      0
>DP00389      118      0
>DP00389      119      0
>DP00389      120      0
>DP00389      121      0
>DP00389      122      0
>DP00389      123      0
>DP00389      124      0
>DP00389      125      0
>DP00389      126      0
>DP00389      127      0
>DP00389      128      0
>DP00389      129      0
>DP00389      130      0
>DP00389      131      0
>DP00389      132      0
>DP00389      133      0
>DP00389      134      0
>DP00389      135      0
>DP00389      136      0
>DP00389      137      0
>DP00389      138      0
>DP00389      139      0
>DP00389      140      0
>DP00389      141      0
>DP00389      142      0
>DP00389      143      0
>DP00389      144      0
>DP00389      145      0
>DP00389      146      0
>DP00389      147      0
>DP00389      148      0
>DP00389      149      0
>DP00389      150      0
>DP00389      151      0
>DP00389      152      0
>DP00389      153      0
>DP00389      154      0
>DP00389      155      0
>DP00389      156      0
>DP00389      157      0
>DP00389      158      0
>DP00389      159      0
>DP00389      160      0
>DP00389      161      0
>DP00389      162      0
>DP00389      163      0
>DP00389      164      0
>DP00389      165      0
>DP00389      166      0
>DP00389      167      0
>DP00389      168      0
>DP00389      169      0
>DP00389      170      0
>DP00389      171      0
>DP00389      172      0
>DP00389      173      0
>DP00389      174      0
>DP00389      175      0
>DP00389      176      0
>DP00389      177      0
>DP00389      178      0
>DP00389      179      0
>DP00389      180      0
>DP00389      181      0
>DP00389      182      0
>DP00389      183      0
>DP00389      184      0
>DP00389      185      0
>DP00389      186      0
>DP00389      187      0
>DP00389      188      0
>DP00389      189      0
>DP00389      190      0
>DP00389      191      0
>DP00389      192      0
>DP00389      193      0
>DP00389      194      0
>DP00389      195      0
>DP00389      196      0
>DP00389      197      0
>DP00389      198      0
>DP00389      199      0
>DP00389      200      0
>DP00389      201      0
>DP00389      202      0
>DP00389      203      0
>DP00389      204      0
>DP00389      205      0
>DP00389      206      0
>DP00389      207      0
>DP00389      208      0
>DP00389      209      0
>DP00389      210      0
>DP00389      211      0
>DP00389      212      0
>DP00389      213      0
>DP00389      214      0
>DP00389      215      0
>DP00389      216      0
>DP00389      217      0
>DP00389      218      0
>DP00389      219      0
>DP00389      220      0
>DP00389      221      0
>DP00389      222      0
>DP00389      223      0
>DP00389      224      0
>DP00389      225      0
>DP00389      226      0
>DP00389      227      0
>DP00389      228      0
>DP00389      229      0
>DP00389      230      0
>DP00389      231      0
>DP00389      232      0
>DP00389      233      0
>DP00389      234      0
>DP00389      235      0
>DP00389      236      0
>DP00389      237      0
>DP00389      238      0
>DP00389      239      0
>DP00389      240      0
>DP00389      241      0
>DP00389      242      0
>DP00389      243      0
>DP00389      244      0
>DP00389      245      0
>DP00389      246      0
>DP00389      247      0
>DP00389      248      0
>DP00389      249      0
>DP00389      250      0
>DP00389      251      0
>DP00389      252      0
>DP00389      253      0
>DP00389      254      0
>DP00389      255      0
>DP00389      256      0
>DP00389      257      0
>DP00389      258      0
>DP00389      259      0
>DP00389      260      0
>DP00389      261      0
>DP00389      262      0
>DP00389      263      0
>DP00389      264      0
>DP00389      265      0
>DP00389      266      0
>DP00389      267      0
>DP00389      268      0
>DP00389      269      0
>DP00389      270      0
>DP00389      271      0
>DP00389      272      0
>DP00389      273      0
>DP00389      274      0
>DP00389      275      0
>DP00389      276      0
>DP00389      277      0
>DP00389      278      0
>DP00389      279      0
>DP00389      280      0
>DP00389      281      0
>DP00389      282      0
>DP00389      283      0
>DP00389      284      0
>DP00389      285      0
>DP00389      286      0
>DP00389      287      0
>DP00389      288      0
>DP00389      289      0
>DP00389      290      0
>DP00389      291      0
>DP00389      292      0
>DP00389      293      0
>DP00389      294      0
>DP00389      295      0
>DP00389      296      0
>DP00389      297      0
>DP00389      298      0
>DP00389      299      0
>DP00389      300      0
>DP00389      301      0
>DP00389      302      0
>DP00389      303      0
>DP00389      304      0
>DP00389      305      0
>DP00389      306      0
>DP00389      307      0
>DP00389      308      0
>DP00389      309      0
>DP00389      310      0
>DP00389      311      0
>DP00389      312      0
>DP00389      313      0
>DP00389      314      0
>DP00389      315      0
>DP00389      316      0
>DP00389      317      0
>DP00389      318      0
>DP00389      319      0
>DP00389      320      0
>DP00389      321      0
>DP00389      322      0
>DP00389      323      0
>DP00389      324      0
>DP00389      325      0
>DP00389      326      0
>DP00389      327      0
>DP00389      328      0
>DP00389      329      0
>DP00389      330      0
>DP00389      331      0
>DP00389      332      0
>DP00389      333      0
>DP00389      334      0
>DP00389      335      0
>DP00389      336      0
>DP00389      337      0
>DP00389      338      0
>DP00389      339      0
>DP00389      340      0
>DP00389      341      0
>DP00389      342      0
>DP00389      343      0
>DP00389      344      0
>DP00389      345      0
>DP00389      346      0
>DP00389      347      0
>DP00389      348      0
>DP00389      349      0
>DP00389      350      0
>DP00389      351      0
>DP00389      352      0
>DP00389      353      0
>DP00389      354      0
>DP00389      355      0
>DP00389      356      0
>DP00389      357      0
>DP00389      358      0
>DP00389      359      0
>DP00389      360      0
>DP00389      361      0
>DP00389      362      0
>DP00389      363      0
>DP00389      364      0
>DP00389      365      0
>DP00389      366      0
>DP00389      367      0
>DP00389      368      0
>DP00389      369      0
>DP00389      370      0
>DP00389      371      0
>DP00389      372      0
>DP00389      373      0
>DP00389      374      0
>DP00389      375      0
>DP00389      376      0
>DP00389      377      0
>DP00389      378      0
>DP00389      379      0
>DP00389      380      0
>DP00389      381      0
>DP00389      382      0
>DP00389      383      0
>DP00389      384      0
>DP00389      385      0
>DP00389      386      0
>DP00389      387      0
>DP00389      388      0
>DP00389      389      0
>DP00389      390      0
>DP00389      391      0
>DP00389      392      0
>DP00389      393      0
>DP00389      394      0
>DP00389      395      0
>DP00389      396      0
>DP00389      397      0
>DP00389      398      0
>DP00389      399      0
>DP00389      400      0
>DP00389      401      0
>DP00389      402      0
>DP00389      403      0
>DP00389      404      0
>DP00389      405      0
>DP00389      406      0
>DP00389      407      0
>DP00389      408      0
>DP00389      409      0
>DP00389      410      0
>DP00389      411      0
>DP00389      412      0
>DP00389      413      0
>DP00389      414      0
>DP00389      415      0
>DP00389      416      0
>DP00389      417      0
>DP00389      418      0
>DP00389      419      0
>DP00389      420      0
>DP00389      421      0
>DP00389      422      0
>DP00389      423      0
>DP00389      424      0
>DP00389      425      0
>DP00389      426      0
>DP00389      427      0
>DP00389      428      0
>DP00389      429      0
>DP00389      430      0
>DP00389      431      0
>DP00389      432      0
>DP00389      433      0
>DP00389      434      0
>DP00389      435      0
>DP00389      436      0
>DP00389      437      0
>DP00389      438      0
>DP00389      439      0
>DP00389      440      0
>DP00389      441      0
>DP00389      442      0
>DP00389      443      0
>DP00389      444      0
>DP00389      445      0
>DP00389      446      0
>DP00389      447      0
>DP00389      448      0
>DP00389      449      0
>DP00389      450      0
>DP00389      451      0
>DP00389      452      0
>DP00389      453      0
>DP00389      454      0
>DP00389      455      0
>DP00389      456      0
>DP00389      457      0
>DP00389      458      0
>DP00389      459      0
>DP00389      460      0
>DP00389      461      0
>DP00389      462      0
>DP00389      463      0
>DP00389      464      0
>DP00389      465      0
>DP00389      466      0
>DP00389      467      0
>DP00389      468      0
>DP00389      469      0
>DP00389      470      0
>DP00389      471      0
>DP00389      472      0
>DP00389      473      0
>DP00389      474      0
>DP00389      475      0
>DP00389      476      0
>DP00389      477      0
>DP00389      478      0
>DP00389      479      0
>DP00389      480      0
>DP00389      481      0
>DP00389      482      0
>DP00389      483      0
>DP00389      484      0
>DP00389      485      0
>DP00389      486      0
>DP00389      487      0
>DP00389      488      0
>DP00389      489      0
>DP00389      490      0
>DP00389      491      0
>DP00389      492      0
>DP00389      493      0
>DP00389      494      0
>DP00389      495      0
>DP00389      496      0
>DP00389      497      0
>DP00389      498      0
>DP00389      499      0
>DP00389      500      0
>DP00389      501      0
>DP00389      502      0
>DP00389      503      0
>DP00389      504      0
>DP00389      505      0
>DP00389      506      0
>DP00389      507      0
>DP00389      508      0
>DP00389      509      0
>DP00389      510      0
>DP00389      511      0
>DP00389      512      0
>DP00389      513      0
>DP00389      514      0
>DP00389      515      0
>DP00389      516      0
>DP00389      517      0
>DP00389      518      0
>DP00389      519      0
>DP00389      520      0
>DP00389      521      0
>DP00389      522      0
>DP00389      523      0
>DP00389      524      0
>DP00389      525      0
>DP00389      526      0
>DP00389      527      0
>DP00389      528      0
>DP00389      529      0
>DP00389      530      0
>DP00389      531      0
>DP00389      532      0
>DP00389      533      0
>DP00389      534      0
>DP00389      535      0
>DP00389      536      0
>DP00389      537      0
>DP00389      538      0
>DP00389      539      0
>DP00389      540      0
>DP00389      541      0
>DP00389      542      0
>DP00389      543      0
>DP00389      544      0
>DP00389      545      0
>DP00389      546      0
>DP00389      547      0
>DP00389      548      0
>DP00389      549      0
>DP00389      550      0
>DP00389      551      0
>DP00389      552      0
>DP00389      553      0
>DP00389      554      0
>DP00389      555      0
>DP00389      556      0
>DP00389      557      0
>DP00389      558      0
>DP00389      559      0
>DP00389      560      0
>DP00389      561      0
>DP00389      562      0
>DP00389      563      0
>DP00389      564      0
>DP00389      565      0
>DP00389      566      0
>DP00389      567      0
>DP00389      568      0
>DP00389      569      0
>DP00389      570      0
>DP00389      571      0
>DP00389      572      0
>DP00389      573      0
>DP00389      574      0
>DP00389      575      0
>DP00389      576      0
>DP00389      577      0
>DP00389      578      0
>DP00389      579      0
>DP00389      580      0
>DP00389      581      0
>DP00389      582      0
>DP00389      583      0
>DP00389      584      0
>DP00389      585      0
>DP00389      586      0
>DP00389      587      0
>DP00389      588      0
>DP00389      589      0
>DP00389      590      0
>DP00389      591      0
>DP00389      592      0
>DP00389      593      0
>DP00389      594      0
>DP00389      595      0
>DP00389      596      0
>DP00389      597      0
>DP00389      598      0
>DP00389      599      0
>DP00389      600      0
>DP00389      601      0
>DP00389      602      0
>DP00389      603      0
>DP00389      604      0
>DP00389      605      0
>DP00389      606      0
>DP00389      607      0
>DP00389      608      0
>DP00389      609      0
>DP00389      610      0
>DP00389      611      0
>DP00389      612      0
>DP00389      613      0
>DP00389      614      0
>DP00389      615      0
>DP00389      616      0
>DP00389      617      0
>DP00389      618      0
>DP00389      619      0
>DP00389      620      0
>DP00389      621      0
>DP00389      622      0
>DP00389      623      0
>DP00389      624      0
>DP00389      625      0
>DP00389      626      0
>DP00389      627      0
>DP00389      628      0
>DP00389      629      0
>DP00389      630      0
>DP00389      631      0
>DP00389      632      0
>DP00389      633      0
>DP00389      634      0
>DP00389      635      0
>DP00389      636      0
>DP00389      637      0
>DP00389      638      0
>DP00389      639      0
>DP00389      640      0
>DP00389      641      0
>DP00389      642      0
>DP00389      643      0
>DP00389      644      0
>DP00389      645      0
>DP00389      646      0
>DP00389      647      0
>DP00389      648      0
>DP00389      649      0
>DP00389      650      0
>DP00389      651      0
>DP00389      652      0
>DP00389      653      0
>DP00389      654      0
>DP00389      655      0
>DP00389      656      0
>DP00389      657      0
>DP00389      658      0
>DP00389      659      0
>DP00389      660      0
>DP00389      661      0
>DP00389      662      0
>DP00389      663      0
>DP00389      664      0
>DP00389      665      0
>DP00389      666      0
>DP00389      667      0
>DP00389      668      0
>DP00389      669      0
>DP00389      670      0
>DP00389      671      0
>DP00389      672      0
>DP00389      673      0
>DP00389      674      0
>DP00389      675      0
>DP00389      676      0
>DP00389      677      0
>DP00389      678      0
>DP00389      679      0
>DP00389      680      0
>DP00389      681      0
>DP00389      682      0
>DP00389      683      0
>DP00389      684      0
>DP00389      685      0
>DP00389      686      0
>DP00389      687      0
>DP00389      688      0
>DP00389      689      0
>DP00389      690      0
>DP00389      691      0
>DP00389      692      0
>DP00389      693      0
>DP00389      694      0
>DP00389      695      0
>DP00389      696      0
>DP00389      697      0
>DP00389      698      0
>DP00389      699      0
>DP00389      700      0
>DP00389      701      0
>DP00389      702      0
>DP00389      703      0
>DP00389      704      0
>DP00389      705      0
>DP00389      706      0
>DP00389      707      0
>DP00389      708      0
>DP00389      709      0
>DP00389      710      0
>DP00389      711      0
>DP00389      712      0
>DP00389      713      0
>DP00389      714      0
>DP00389      715      0
>DP00389      716      0
>DP00389      717      0
>DP00389      718      0
>DP00389      719      0
>DP00389      720      0
>DP00389      721      0
>DP00389      722      0
>DP00389      723      0
>DP00389      724      0
>DP00389      725      0
>DP00389      726      0
>DP00389      727      0
>DP00389      728      0
>DP00389      729      0
>DP00389      730      0
>DP00389      731      0
>DP00389      732      0
>DP00389      733      0
>DP00389      734      0
>DP00389      735      0
>DP00389      736      0
>DP00389      737      0
>DP00389      738      0
>DP00389      739      0
>DP00389      740      0
>DP00389      741      0
>DP00389      742      0
>DP00389      743      0
>DP00389      744      0
>DP00389      745      0
>DP00389      746      0
>DP00389      747      0
>DP00389      748      0
>DP00389      749      0
>DP00389      750      0
>DP00389      751      0
>DP00389      752      0
>DP00389      753      0
>DP00389      754      0
>DP00389      755      0
>DP00389      756      0
>DP00389      757      0
>DP00389      758      0
>DP00389      759      0
>DP00389      760      0
>DP00389      761      0
>DP00389      762      0
>DP00389      763      0
>DP00389      764      0
>DP00389      765      0
>DP00389      766      0
>DP00389      767      0
>DP00389      768      0
>DP00389      769      0
>DP00389      770      0
>DP00389      771      0
>DP00389      772      0
>DP00389      773      0
>DP00389      774      0
>DP00389      775      0
>DP00389      776      0
>DP00389      777      0
>DP00389      778      0
>DP00389      779      0
>DP00389      780      0
>DP00389      781      0
>DP00389      782      0
>DP00389      783      0
>DP00389      784      0
>DP00389      785      0
>DP00389      786      0
>DP00389      787      0
>DP00389      788      0
>DP00389      789      0
>DP00389      790      0
>DP00389      791      0
>DP00389      792      0
>DP00389      793      0
>DP00389      794      0
>DP00389      795      0
>DP00389      796      0
>DP00389      797      0
>DP00389      798      0
>DP00389      799      0
>DP00389      800      0
>DP00389      801      0
>DP00389      802      0
>DP00389      803      0
>DP00389      804      0
>DP00389      805      0
>DP00389      806      0
>DP00389      807      0
>DP00389      808      0
>DP00389      809      0
>DP00389      810      0
>DP00389      811      0
>DP00389      812      0
>DP00389      813      0
>DP00389      814      0
>DP00389      815      0
>DP00389      816      0
>DP00389      817      0
>DP00389      818      0
>DP00389      819      0
>DP00389      820      0
>DP00389      821      0
>DP00389      822      0
>DP00389      823      0
>DP00389      824      0
>DP00389      825      0
>DP00389      826      0
>DP00389      827      0
>DP00389      828      0
>DP00389      829      0
>DP00389      830      0
>DP00389      831      0
>DP00389      832      0
>DP00389      833      0
>DP00389      834      0
>DP00389      835      0
>DP00389      836      0
>DP00389      837      0
>DP00389      838      0
>DP00389      839      0
>DP00389      840      0
>DP00389      841      0
>DP00389      842      0
>DP00389      843      0
>DP00389      844      0
>DP00389      845      0
>DP00389      846      0
>DP00389      847      0
>DP00389      848      0
>DP00389      849      0
>DP00389      850      0
>DP00389      851      0
>DP00389      852      0
>DP00389      853      0
>DP00389      854      0
>DP00389      855      0
>DP00389      856      0
>DP00389      857      0
>DP00389      858      0
>DP00389      859      0
>DP00389      860      0
>DP00389      861      0
>DP00389      862      0
>DP00389      863      0
>DP00389      864      0
>DP00389      865      0
>DP00389      866      0
>DP00389      867      0
>DP00389      868      0
>DP00389      869      0
>DP00389      870      0
>DP00389      871      0
>DP00389      872      0
>DP00389      873      0
>DP00389      874      0
>DP00389      875      0
>DP00389      876      0
>DP00389      877      0
>DP00389      878      0
>DP00389      879      0
>DP00389      880      0
>DP00389      881      0
>DP00389      882      0
>DP00389      883      0
>DP00389      884      0
>DP00389      885      0
>DP00389      886      0
>DP00389      887      0
>DP00389      888      0
>DP00389      889      0
>DP00389      890      0
>DP00389      891      0
>DP00389      892      0
>DP00389      893      0
>DP00389      894      0
>DP00389      895      0
>DP00389      896      0
>DP00389      897      0
>DP00389      898      0
>DP00389      899      0
>DP00389      900      0
>DP00389      901      0
>DP00389      902      0
>DP00389      903      0
>DP00389      904      0
>DP00389      905      0
>DP00389      906      0
>DP00389      907      0
>DP00389      908      0
>DP00389      909      0
>DP00389      910      0
>DP00389      911      0
>DP00389      912      0
>DP00389      913      0
>DP00389      914      0
>DP00389      915      0
>DP00389      916      0
>DP00389      917      0
>DP00389      918      0
>DP00389      919      0
>DP00389      920      0
>DP00389      921      0
>DP00389      922      0
>DP00389      923      0
>DP00389      924      0
>DP00389      925      0
>DP00389      926      0
>DP00389      927      0
>DP00389      928      0
>DP00389      929      0
>DP00389      930      0
>DP00389      931      0
>DP00389      932      0
>DP00389      933      0
>DP00389      934      0
>DP00389      935      0
>DP00389      936      0
>DP00389      937      0
>DP00389      938      0
>DP00389      939      0
>DP00389      940      0
>DP00389      941      0
>DP00389      942      0
>DP00389      943      0
>DP00389      944      0
>DP00389      945      0
>DP00389      946      0
>DP00389      947      0
>DP00389      948      0
>DP00389      949      0
>DP00389      950      0
>DP00389      951      0
>DP00389      952      0
>DP00389      953      0
>DP00389      954      0
>DP00389      955      0
>DP00389      956      0
>DP00389      957      0
>DP00389      958      0
>DP00389      959      0
>DP00389      960      0
>DP00389      961      0
>DP00389      962      0
>DP00389      963      1
>DP00389      964      1
>DP00389      965      1
>DP00389      966      1
>DP00389      967      1
>DP00389      968      1
>DP00389      969      1
>DP00389      970      1
>DP00389      971      1
>DP00389      972      1
>DP00389      973      1
>DP00389      974      1
>DP00389      975      1
>DP00389      976      1
>DP00389      977      1
>DP00389      978      1
>DP00389      979      1
>DP00389      980      1
>DP00389      981      1
>DP00389      982      1
>DP00389      983      1
>DP00389      984      1
>DP00389      985      1
>DP00389      986      1
>DP00389      987      1
>DP00389      988      1
>DP00389      989      1
>DP00389      990      1
>DP00389      991      1
>DP00389      992      1
>DP00389      993      1
>DP00389      994      1
>DP00389      995      1
>DP00389      996      1
>DP00389      997      1
>DP00389      998      1
>DP00389      999      1
>DP00389      1000      1
>DP00389      1001      1
>DP00389      1002      1
>DP00389      1003      1
>DP00389      1004      1
>DP00389      1005      1
>DP00389      1006      1
>DP00389      1007      1
>DP00389      1008      1
>DP00389      1009      1
>DP00389      1010      1
>DP00389      1011      1
>DP00389      1012      1
>DP00389      1013      1
>DP00389      1014      1
>DP00389      1015      1
>DP00389      1016      1
>DP00389      1017      1
>DP00389      1018      1
>DP00389      1019      1
>DP00389      1020      1
>DP00389      1021      1
>DP00389      1022      1
>DP00389      1023      1
>1kum_A      1      0
>1kum_A      2      0
>1kum_A      3      0
>1kum_A      4      0
>1kum_A      5      0
>1kum_A      6      0
>1kum_A      7      0
>1kum_A      8      0
>1kum_A      9      0
>1kum_A      10      0
>1kum_A      11      0
>1kum_A      12      0
>1kum_A      13      0
>1kum_A      14      0
>1kum_A      15      0
>1kum_A      16      0
>1kum_A      17      0
>1kum_A      18      0
>1kum_A      19      0
>1kum_A      20      0
>1kum_A      21      0
>1kum_A      22      0
>1kum_A      23      0
>1kum_A      24      0
>1kum_A      25      0
>1kum_A      26      0
>1kum_A      27      0
>1kum_A      28      0
>1kum_A      29      0
>1kum_A      30      0
>1kum_A      31      0
>1kum_A      32      0
>1kum_A      33      0
>1kum_A      34      0
>1kum_A      35      0
>1kum_A      36      0
>1kum_A      37      0
>1kum_A      38      0
>1kum_A      39      0
>1kum_A      40      0
>1kum_A      41      0
>1kum_A      42      0
>1kum_A      43      0
>1kum_A      44      0
>1kum_A      45      0
>1kum_A      46      0
>1kum_A      47      0
>1kum_A      48      0
>1kum_A      49      0
>1kum_A      50      0
>1kum_A      51      0
>1kum_A      52      0
>1kum_A      53      0
>1kum_A      54      0
>1kum_A      55      0
>1kum_A      56      0
>1kum_A      57      0
>1kum_A      58      0
>1kum_A      59      0
>1kum_A      60      0
>1kum_A      61      0
>1kum_A      62      0
>1kum_A      63      0
>1kum_A      64      0
>1kum_A      65      0
>1kum_A      66      0
>1kum_A      67      0
>1kum_A      68      0
>1kum_A      69      0
>1kum_A      70      0
>1kum_A      71      0
>1kum_A      72      0
>1kum_A      73      0
>1kum_A      74      0
>1kum_A      75      0
>1kum_A      76      0
>1kum_A      77      0
>1kum_A      78      0
>1kum_A      79      0
>1kum_A      80      0
>1kum_A      81      0
>1kum_A      82      0
>1kum_A      83      0
>1kum_A      84      0
>1kum_A      85      0
>1kum_A      86      0
>1kum_A      87      0
>1kum_A      88      0
>1kum_A      89      0
>1kum_A      90      0
>1kum_A      91      0
>1kum_A      92      0
>1kum_A      93      0
>1kum_A      94      0
>1kum_A      95      0
>1kum_A      96      0
>1kum_A      97      0
>1kum_A      98      0
>1kum_A      99      0
>1kum_A      100      0
>1kum_A      101      0
>1kum_A      102      0
>1kum_A      103      0
>1kum_A      104      0
>1kum_A      105      0
>1kum_A      106      0
>1kum_A      107      0
>1kum_A      108      0
>3d4e_A      1      0
>3d4e_A      2      0
>3d4e_A      3      0
>3d4e_A      4      0
>3d4e_A      5      0
>3d4e_A      6      0
>3d4e_A      7      0
>3d4e_A      8      0
>3d4e_A      9      0
>3d4e_A      10      0
>3d4e_A      11      0
>3d4e_A      12      0
>3d4e_A      13      0
>3d4e_A      14      0
>3d4e_A      15      0
>3d4e_A      16      0
>3d4e_A      17      0
>3d4e_A      18      0
>3d4e_A      19      0
>3d4e_A      20      0
>3d4e_A      21      0
>3d4e_A      22      0
>3d4e_A      23      0
>3d4e_A      24      0
>3d4e_A      25      0
>3d4e_A      26      0
>3d4e_A      27      0
>3d4e_A      28      0
>3d4e_A      29      0
>3d4e_A      30      0
>3d4e_A      31      0
>3d4e_A      32      0
>3d4e_A      33      0
>3d4e_A      34      0
>3d4e_A      35      0
>3d4e_A      36      0
>3d4e_A      37      0
>3d4e_A      38      0
>3d4e_A      39      0
>3d4e_A      40      0
>3d4e_A      41      0
>3d4e_A      42      0
>3d4e_A      43      0
>3d4e_A      44      0
>3d4e_A      45      0
>3d4e_A      46      0
>3d4e_A      47      0
>3d4e_A      48      0
>3d4e_A      49      0
>3d4e_A      50      0
>3d4e_A      51      0
>3d4e_A      52      0
>3d4e_A      53      0
>3d4e_A      54      0
>3d4e_A      55      0
>3d4e_A      56      0
>3d4e_A      57      0
>3d4e_A      58      0
>3d4e_A      59      0
>3d4e_A      60      0
>3d4e_A      61      0
>3d4e_A      62      0
>3d4e_A      63      0
>3d4e_A      64      0
>3d4e_A      65      0
>3d4e_A      66      0
>3d4e_A      67      0
>3d4e_A      68      0
>3d4e_A      69      0
>3d4e_A      70      0
>3d4e_A      71      0
>3d4e_A      72      0
>3d4e_A      73      0
>3d4e_A      74      0
>3d4e_A      75      0
>3d4e_A      76      0
>3d4e_A      77      0
>3d4e_A      78      0
>3d4e_A      79      0
>3d4e_A      80      0
>3d4e_A      81      0
>3d4e_A      82      0
>3d4e_A      83      0
>3d4e_A      84      0
>3d4e_A      85      0
>3d4e_A      86      0
>3d4e_A      87      0
>3d4e_A      88      0
>3d4e_A      89      0
>3d4e_A      90      0
>3d4e_A      91      0
>3d4e_A      92      0
>3d4e_A      93      0
>3d4e_A      94      0
>3d4e_A      95      0
>3d4e_A      96      0
>3d4e_A      97      0
>3d4e_A      98      0
>3d4e_A      99      0
>3d4e_A      100      0
>3d4e_A      101      0
>3d4e_A      102      0
>3d4e_A      103      0
>3d4e_A      104      0
>3d4e_A      105      0
>3d4e_A      106      0
>3d4e_A      107      0
>3d4e_A      108      0
>3d4e_A      109      0
>3d4e_A      110      0
>3d4e_A      111      0
>3d4e_A      112      0
>3d4e_A      113      0
>3d4e_A      114      0
>3d4e_A      115      0
>3d4e_A      116      0
>3d4e_A      117      0
>3d4e_A      118      0
>3d4e_A      119      0
>3d4e_A      120      0
>3d4e_A      121      0
>3d4e_A      122      0
>3d4e_A      123      0
>3d4e_A      124      0
>3d4e_A      125      0
>3d4e_A      126      0
>3d4e_A      127      0
>3d4e_A      128      0
>3d4e_A      129      0
>3d4e_A      130      0
>3d4e_A      131      0
>3d4e_A      132      0
>3d4e_A      133      0
>3d4e_A      134      0
>3d4e_A      135      0
>3d4e_A      136      0
>3d4e_A      137      0
>3d4e_A      138      0
>3d4e_A      139      0
>3d4e_A      140      0
>3d4e_A      141      0
>3d4e_A      142      0
>3d4e_A      143      0
>3d4e_A      144      0
>3d4e_A      145      0
>3d4e_A      146      0
>3d4e_A      147      0
>3d4e_A      148      0
>3d4e_A      149      0
>3d4e_A      150      0
>3d4e_A      151      0
>3d4e_A      152      0
>3d4e_A      153      0
>3d4e_A      154      0
>3d4e_A      155      0
>3d4e_A      156      0
>3d4e_A      157      0
>3d4e_A      158      0
>3d4e_A      159      0
>3d4e_A      160      0
>3d4e_A      161      0
>3d4e_A      162      0
>3d4e_A      163      0
>3d4e_A      164      0
>3d4e_A      165      0
>3d4e_A      166      0
>3d4e_A      167      0
>3d4e_A      168      0
>3d4e_A      169      0
>3d4e_A      170      0
>3d4e_A      171      0
>3d4e_A      172      0
>3d4e_A      173      0
>3d4e_A      174      0
>3d4e_A      175      0
>3d4e_A      176      0
>3d4e_A      177      0
>3d4e_A      178      0
>3d4e_A      179      0
>DP00247      1      0
>DP00247      2      0
>DP00247      3      0
>DP00247      4      0
>DP00247      5      0
>DP00247      6      0
>DP00247      7      0
>DP00247      8      0
>DP00247      9      0
>DP00247      10      0
>DP00247      11      0
>DP00247      12      0
>DP00247      13      0
>DP00247      14      0
>DP00247      15      0
>DP00247      16      0
>DP00247      17      0
>DP00247      18      0
>DP00247      19      0
>DP00247      20      0
>DP00247      21      1
>DP00247      22      0
>DP00247      23      0
>DP00247      24      0
>DP00247      25      0
>DP00247      26      0
>DP00247      27      0
>DP00247      28      0
>DP00247      29      0
>DP00247      30      0
>DP00247      31      0
>DP00247      32      0
>DP00247      33      0
>DP00247      34      0
>DP00247      35      0
>DP00247      36      0
>DP00247      37      0
>DP00247      38      0
>DP00247      39      0
>DP00247      40      0
>DP00247      41      0
>DP00247      42      0
>DP00247      43      0
>DP00247      44      0
>DP00247      45      0
>DP00247      46      0
>DP00247      47      0
>DP00247      48      0
>DP00247      49      0
>DP00247      50      0
>DP00247      51      0
>DP00247      52      0
>DP00247      53      0
>DP00247      54      0
>DP00247      55      0
>DP00247      56      0
>DP00247      57      0
>DP00247      58      0
>DP00247      59      0
>DP00247      60      0
>DP00247      61      0
>DP00247      62      0
>DP00247      63      0
>DP00247      64      0
>DP00247      65      0
>DP00247      66      0
>DP00247      67      0
>DP00247      68      1
>DP00247      69      1
>DP00247      70      1
>DP00247      71      1
>DP00247      72      1
>DP00247      73      1
>DP00247      74      0
>DP00247      75      0
>DP00247      76      0
>DP00247      77      0
>DP00247      78      0
>DP00247      79      0
>DP00247      80      0
>DP00247      81      0
>DP00247      82      0
>DP00247      83      0
>DP00247      84      0
>DP00247      85      0
>DP00247      86      0
>DP00247      87      0
>DP00247      88      0
>DP00247      89      0
>DP00247      90      0
>DP00247      91      0
>DP00247      92      0
>DP00247      93      0
>DP00247      94      0
>DP00247      95      0
>DP00247      96      0
>DP00247      97      0
>DP00247      98      0
>DP00247      99      0
>DP00247      100      0
>DP00247      101      0
>DP00247      102      0
>DP00247      103      1
>DP00247      104      1
>DP00247      105      1
>DP00247      106      1
>DP00247      107      1
>DP00247      108      0
>DP00247      109      0
>DP00247      110      0
>DP00247      111      0
>DP00247      112      0
>DP00247      113      0
>DP00247      114      0
>DP00247      115      0
>DP00247      116      0
>DP00247      117      0
>DP00247      118      0
>DP00247      119      0
>DP00247      120      0
>DP00247      121      0
>DP00247      122      0
>DP00247      123      0
>DP00247      124      0
>DP00247      125      0
>DP00247      126      0
>DP00247      127      0
>DP00247      128      0
>DP00247      129      0
>DP00247      130      0
>DP00247      131      0
>DP00247      132      0
>DP00247      133      0
>DP00247      134      0
>DP00247      135      0
>DP00247      136      0
>DP00247      137      0
>DP00247      138      0
>DP00247      139      0
>DP00247      140      0
>DP00247      141      0
>DP00247      142      0
>DP00247      143      0
>DP00247      144      0
>DP00247      145      0
>DP00247      146      0
>DP00247      147      0
>DP00247      148      0
>DP00247      149      0
>DP00247      150      0
>DP00247      151      0
>DP00247      152      0
>DP00247      153      0
>DP00247      154      0
>DP00247      155      0
>DP00247      156      0
>DP00247      157      0
>DP00247      158      0
>DP00247      159      0
>DP00247      160      0
>DP00247      161      0
>DP00247      162      0
>DP00247      163      0
>DP00247      164      0
>DP00247      165      0
>DP00247      166      0
>DP00247      167      0
>DP00247      168      0
>DP00247      169      0
>DP00247      170      0
>DP00247      171      0
>DP00247      172      0
>DP00247      173      0
>DP00247      174      0
>DP00247      175      0
>DP00247      176      0
>DP00247      177      0
>DP00247      178      0
>DP00247      179      0
>DP00247      180      0
>DP00247      181      0
>DP00247      182      0
>DP00247      183      0
>DP00247      184      0
>DP00247      185      0
>DP00247      186      0
>DP00247      187      0
>DP00247      188      0
>DP00247      189      0
>DP00247      190      0
>DP00247      191      0
>DP00247      192      0
>DP00247      193      0
>DP00247      194      0
>DP00247      195      0
>DP00247      196      0
>DP00247      197      0
>DP00247      198      0
>DP00247      199      0
>DP00247      200      0
>DP00247      201      0
>DP00247      202      0
>DP00247      203      0
>DP00247      204      0
>DP00247      205      0
>1lv3_A      1      0
>1lv3_A      2      0
>1lv3_A      3      0
>1lv3_A      4      0
>1lv3_A      5      0
>1lv3_A      6      0
>1lv3_A      7      0
>1lv3_A      8      0
>1lv3_A      9      0
>1lv3_A      10      0
>1lv3_A      11      0
>1lv3_A      12      0
>1lv3_A      13      0
>1lv3_A      14      0
>1lv3_A      15      0
>1lv3_A      16      0
>1lv3_A      17      0
>1lv3_A      18      0
>1lv3_A      19      0
>1lv3_A      20      0
>1lv3_A      21      0
>1lv3_A      22      0
>1lv3_A      23      0
>1lv3_A      24      0
>1lv3_A      25      0
>1lv3_A      26      0
>1lv3_A      27      0
>1lv3_A      28      0
>1lv3_A      29      0
>1lv3_A      30      0
>1lv3_A      31      0
>1lv3_A      32      0
>1lv3_A      33      0
>1lv3_A      34      0
>1lv3_A      35      0
>1lv3_A      36      0
>1lv3_A      37      0
>1lv3_A      38      0
>1lv3_A      39      0
>1lv3_A      40      0
>1lv3_A      41      0
>1lv3_A      42      0
>1lv3_A      43      0
>1lv3_A      44      0
>1lv3_A      45      0
>1lv3_A      46      0
>1lv3_A      47      0
>1lv3_A      48      0
>1lv3_A      49      0
>1lv3_A      50      0
>1lv3_A      51      0
>1lv3_A      52      0
>1lv3_A      53      0
>1lv3_A      54      0
>1lv3_A      55      0
>1lv3_A      56      0
>1lv3_A      57      0
>1lv3_A      58      0
>1lv3_A      59      0
>1lv3_A      60      0
>1lv3_A      61      0
>1lv3_A      62      0
>1lv3_A      63      0
>1lv3_A      64      0
>1lv3_A      65      0
>1lv3_A      66      0
>1lv3_A      67      0
>1lv3_A      68      0
>2fkx_A      1      0
>2fkx_A      2      0
>2fkx_A      3      0
>2fkx_A      4      0
>2fkx_A      5      0
>2fkx_A      6      0
>2fkx_A      7      0
>2fkx_A      8      0
>2fkx_A      9      0
>2fkx_A      10      0
>2fkx_A      11      0
>2fkx_A      12      0
>2fkx_A      13      0
>2fkx_A      14      0
>2fkx_A      15      0
>2fkx_A      16      0
>2fkx_A      17      0
>2fkx_A      18      0
>2fkx_A      19      0
>2fkx_A      20      0
>2fkx_A      21      0
>2fkx_A      22      0
>2fkx_A      23      0
>2fkx_A      24      0
>2fkx_A      25      0
>2fkx_A      26      0
>2fkx_A      27      0
>2fkx_A      28      0
>2fkx_A      29      0
>2fkx_A      30      0
>2fkx_A      31      0
>2fkx_A      32      0
>2fkx_A      33      0
>2fkx_A      34      0
>2fkx_A      35      0
>2fkx_A      36      0
>2fkx_A      37      0
>2fkx_A      38      0
>2fkx_A      39      0
>2fkx_A      40      0
>2fkx_A      41      0
>2fkx_A      42      0
>2fkx_A      43      0
>2fkx_A      44      0
>2fkx_A      45      0
>2fkx_A      46      0
>2fkx_A      47      0
>2fkx_A      48      0
>2fkx_A      49      0
>2fkx_A      50      0
>2fkx_A      51      0
>2fkx_A      52      0
>2fkx_A      53      0
>2fkx_A      54      0
>2fkx_A      55      0
>2fkx_A      56      0
>2fkx_A      57      0
>2fkx_A      58      0
>2fkx_A      59      0
>2fkx_A      60      0
>2fkx_A      61      0
>2fkx_A      62      0
>2fkx_A      63      0
>2fkx_A      64      0
>2fkx_A      65      0
>2fkx_A      66      0
>2fkx_A      67      0
>2fkx_A      68      0
>2fkx_A      69      0
>2fkx_A      70      0
>2fkx_A      71      0
>2fkx_A      72      0
>2fkx_A      73      0
>2fkx_A      74      0
>2fkx_A      75      0
>2fkx_A      76      0
>2fkx_A      77      0
>2fkx_A      78      0
>2fkx_A      79      0
>2fkx_A      80      0
>2fkx_A      81      0
>2fkx_A      82      0
>2fkx_A      83      0
>2fkx_A      84      0
>2fkx_A      85      0
>2fkx_A      86      0
>2fkx_A      87      0
>2fkx_A      88      0
>DP00105      1      1
>DP00105      2      1
>DP00105      3      1
>DP00105      4      1
>DP00105      5      1
>DP00105      6      1
>DP00105      7      1
>DP00105      8      1
>DP00105      9      1
>DP00105      10      1
>DP00105      11      1
>DP00105      12      1
>DP00105      13      1
>DP00105      14      1
>DP00105      15      1
>DP00105      16      1
>DP00105      17      1
>DP00105      18      1
>DP00105      19      1
>DP00105      20      1
>DP00105      21      1
>DP00105      22      1
>DP00105      23      1
>DP00105      24      1
>DP00105      25      1
>DP00105      26      1
>DP00105      27      1
>DP00105      28      1
>DP00105      29      1
>DP00105      30      1
>DP00105      31      1
>DP00105      32      1
>DP00105      33      1
>DP00105      34      1
>DP00105      35      1
>DP00105      36      1
>DP00105      37      1
>DP00105      38      1
>DP00105      39      1
>DP00105      40      1
>DP00105      41      1
>DP00105      42      1
>DP00105      43      1
>DP00105      44      1
>DP00105      45      1
>DP00105      46      0
>DP00105      47      0
>DP00105      48      0
>DP00105      49      0
>DP00105      50      0
>DP00105      51      0
>DP00105      52      0
>DP00105      53      0
>DP00105      54      0
>DP00105      55      0
>DP00105      56      0
>DP00105      57      0
>DP00105      58      0
>DP00105      59      0
>DP00105      60      0
>DP00105      61      0
>DP00105      62      0
>DP00105      63      0
>DP00105      64      0
>DP00105      65      0
>DP00105      66      0
>DP00105      67      0
>DP00105      68      0
>DP00105      69      0
>DP00105      70      0
>DP00105      71      0
>DP00105      72      0
>DP00105      73      0
>DP00105      74      0
>DP00105      75      0
>DP00105      76      0
>DP00105      77      0
>DP00105      78      0
>DP00105      79      0
>DP00105      80      0
>DP00105      81      0
>DP00105      82      0
>DP00105      83      0
>DP00105      84      0
>DP00105      85      0
>DP00105      86      0
>DP00105      87      0
>DP00105      88      0
>DP00105      89      0
>DP00105      90      0
>DP00105      91      0
>DP00105      92      0
>DP00105      93      0
>DP00105      94      0
>DP00105      95      0
>DP00105      96      0
>DP00105      97      0
>DP00105      98      0
>DP00105      99      0
>DP00105      100      0
>DP00105      101      0
>DP00105      102      0
>DP00105      103      0
>DP00105      104      0
>DP00105      105      0
>DP00105      106      0
>DP00105      107      0
>DP00105      108      0
>DP00105      109      0
>DP00105      110      0
>DP00105      111      0
>DP00105      112      0
>DP00105      113      0
>DP00105      114      0
>DP00105      115      0
>DP00105      116      0
>DP00105      117      0
>DP00105      118      0
>DP00105      119      0
>DP00105      120      0
>DP00105      121      0
>DP00105      122      0
>DP00105      123      0
>DP00105      124      0
>DP00105      125      0
>DP00105      126      0
>DP00105      127      0
>DP00105      128      0
>DP00105      129      0
>DP00105      130      0
>DP00105      131      0
>DP00105      132      0
>DP00105      133      0
>DP00105      134      0
>DP00105      135      0
>DP00105      136      0
>DP00105      137      0
>DP00105      138      0
>DP00105      139      0
>DP00105      140      0
>DP00105      141      0
>DP00105      142      0
>DP00105      143      0
>DP00105      144      0
>DP00105      145      0
>DP00105      146      0
>DP00105      147      0
>DP00105      148      0
>DP00105      149      0
>DP00105      150      0
>DP00105      151      0
>DP00105      152      0
>DP00105      153      0
>DP00105      154      0
>DP00105      155      0
>DP00105      156      0
>DP00105      157      0
>DP00105      158      0
>DP00105      159      0
>DP00105      160      0
>DP00105      161      0
>DP00105      162      0
>DP00105      163      0
>DP00105      164      0
>DP00105      165      0
>DP00105      166      0
>DP00105      167      0
>DP00105      168      0
>DP00105      169      0
>DP00105      170      0
>DP00105      171      0
>DP00105      172      0
>DP00105      173      0
>DP00105      174      0
>DP00105      175      0
>DP00105      176      0
>DP00105      177      0
>DP00105      178      0
>DP00105      179      0
>DP00105      180      0
>DP00105      181      0
>DP00105      182      0
>DP00105      183      0
>DP00105      184      0
>DP00105      185      0
>DP00105      186      0
>DP00105      187      0
>DP00105      188      0
>DP00105      189      0
>DP00105      190      0
>DP00105      191      0
>DP00105      192      0
>DP00105      193      0
>DP00105      194      0
>DP00105      195      0
>DP00105      196      0
>DP00105      197      0
>DP00105      198      0
>DP00105      199      0
>DP00105      200      0
>DP00105      201      0
>DP00105      202      0
>DP00105      203      0
>DP00105      204      0
>DP00105      205      0
>DP00105      206      0
>DP00105      207      0
>DP00105      208      0
>DP00105      209      0
>DP00105      210      0
>DP00105      211      0
>DP00105      212      0
>DP00105      213      0
>DP00105      214      0
>DP00105      215      0
>DP00105      216      0
>DP00105      217      0
>DP00105      218      0
>DP00105      219      0
>DP00105      220      0
>DP00105      221      0
>DP00105      222      0
>DP00105      223      0
>DP00105      224      0
>DP00554      1      0
>DP00554      2      0
>DP00554      3      0
>DP00554      4      0
>DP00554      5      0
>DP00554      6      0
>DP00554      7      0
>DP00554      8      0
>DP00554      9      0
>DP00554      10      0
>DP00554      11      0
>DP00554      12      0
>DP00554      13      0
>DP00554      14      0
>DP00554      15      0
>DP00554      16      0
>DP00554      17      0
>DP00554      18      0
>DP00554      19      0
>DP00554      20      0
>DP00554      21      0
>DP00554      22      0
>DP00554      23      0
>DP00554      24      0
>DP00554      25      0
>DP00554      26      0
>DP00554      27      0
>DP00554      28      0
>DP00554      29      0
>DP00554      30      0
>DP00554      31      1
>DP00554      32      1
>DP00554      33      1
>DP00554      34      1
>DP00554      35      1
>DP00554      36      1
>DP00554      37      1
>DP00554      38      1
>DP00554      39      1
>DP00554      40      1
>DP00554      41      1
>DP00554      42      1
>DP00554      43      1
>DP00554      44      1
>DP00554      45      1
>DP00554      46      1
>DP00554      47      1
>DP00554      48      1
>DP00554      49      1
>DP00554      50      1
>DP00554      51      0
>DP00554      52      0
>DP00554      53      0
>DP00554      54      0
>DP00554      55      0
>DP00554      56      0
>DP00554      57      0
>DP00554      58      0
>DP00554      59      0
>DP00554      60      0
>DP00554      61      0
>DP00554      62      0
>DP00554      63      0
>DP00554      64      0
>DP00554      65      0
>DP00554      66      0
>DP00554      67      0
>DP00554      68      0
>DP00554      69      0
>DP00554      70      0
>DP00554      71      0
>DP00554      72      0
>DP00554      73      0
>DP00554      74      0
>DP00554      75      0
>DP00554      76      0
>DP00554      77      0
>DP00554      78      0
>DP00554      79      0
>DP00554      80      0
>DP00554      81      0
>DP00554      82      0
>DP00554      83      0
>DP00554      84      0
>DP00554      85      0
>DP00554      86      0
>DP00554      87      0
>DP00554      88      0
>DP00554      89      0
>DP00554      90      0
>DP00554      91      0
>DP00554      92      0
>DP00554      93      0
>DP00554      94      0
>DP00554      95      0
>DP00554      96      0
>DP00554      97      0
>DP00554      98      0
>DP00554      99      0
>DP00554      100      0
>DP00554      101      0
>DP00554      102      0
>DP00554      103      0
>DP00554      104      0
>DP00554      105      0
>DP00554      106      0
>DP00554      107      0
>DP00554      108      0
>DP00554      109      0
>DP00554      110      0
>DP00554      111      0
>DP00554      112      0
>DP00554      113      0
>DP00554      114      0
>DP00554      115      0
>DP00554      116      0
>DP00554      117      0
>DP00554      118      0
>DP00554      119      0
>DP00554      120      0
>DP00554      121      0
>DP00554      122      0
>DP00554      123      0
>DP00554      124      0
>DP00554      125      0
>DP00554      126      0
>DP00554      127      0
>DP00554      128      0
>DP00554      129      0
>DP00554      130      0
>DP00554      131      0
>DP00554      132      0
>DP00554      133      0
>DP00554      134      0
>DP00554      135      0
>DP00554      136      0
>DP00554      137      0
>DP00554      138      0
>DP00554      139      0
>DP00554      140      0
>DP00554      141      0
>DP00554      142      0
>DP00554      143      0
>DP00554      144      0
>DP00554      145      0
>DP00554      146      0
>DP00554      147      0
>DP00554      148      0
>DP00554      149      0
>DP00554      150      0
>DP00554      151      0
>DP00554      152      0
>DP00554      153      0
>DP00554      154      0
>DP00554      155      0
>DP00554      156      0
>DP00554      157      0
>DP00554      158      0
>DP00554      159      0
>DP00554      160      0
>DP00554      161      0
>DP00554      162      0
>DP00554      163      0
>DP00554      164      0
>DP00554      165      0
>DP00554      166      0
>DP00554      167      0
>DP00554      168      0
>DP00554      169      0
>DP00554      170      0
>DP00554      171      0
>DP00554      172      0
>DP00554      173      0
>DP00554      174      0
>DP00554      175      0
>DP00554      176      0
>DP00554      177      0
>DP00554      178      0
>DP00554      179      0
>DP00554      180      0
>DP00554      181      0
>DP00554      182      0
>DP00554      183      0
>DP00554      184      0
>DP00554      185      0
>DP00554      186      0
>DP00554      187      0
>DP00554      188      0
>DP00554      189      0
>DP00554      190      0
>DP00554      191      0
>DP00554      192      0
>DP00554      193      0
>DP00554      194      0
>DP00554      195      0
>DP00554      196      0
>DP00554      197      0
>DP00554      198      0
>DP00554      199      0
>DP00554      200      0
>DP00554      201      0
>DP00554      202      0
>DP00554      203      0
>DP00554      204      0
>DP00554      205      0
>DP00554      206      0
>DP00554      207      0
>DP00554      208      0
>DP00554      209      0
>DP00554      210      0
>DP00554      211      0
>DP00554      212      0
>DP00554      213      0
>DP00554      214      0
>DP00554      215      0
>DP00554      216      0
>DP00554      217      0
>DP00554      218      0
>DP00554      219      0
>DP00554      220      0
>DP00554      221      0
>DP00554      222      0
>DP00554      223      0
>DP00554      224      0
>DP00554      225      0
>DP00554      226      0
>DP00554      227      0
>DP00554      228      0
>DP00554      229      0
>DP00554      230      0
>DP00554      231      0
>DP00554      232      0
>DP00554      233      0
>DP00554      234      0
>DP00554      235      0
>DP00554      236      0
>DP00554      237      0
>DP00554      238      0
>DP00554      239      0
>DP00554      240      0
>DP00554      241      0
>DP00554      242      0
>DP00554      243      0
>DP00554      244      0
>DP00554      245      0
>DP00554      246      0
>DP00554      247      0
>DP00554      248      0
>DP00554      249      0
>DP00554      250      0
>DP00554      251      0
>DP00554      252      0
>DP00554      253      0
>DP00554      254      0
>DP00554      255      0
>DP00554      256      0
>DP00554      257      0
>DP00554      258      0
>DP00554      259      0
>DP00554      260      0
>DP00554      261      0
>DP00554      262      0
>DP00554      263      0
>DP00554      264      0
>DP00554      265      0
>DP00554      266      0
>DP00554      267      0
>DP00554      268      0
>DP00554      269      0
>DP00554      270      0
>DP00554      271      0
>DP00554      272      0
>DP00554      273      0
>DP00554      274      0
>DP00554      275      0
>DP00554      276      0
>DP00554      277      0
>DP00554      278      0
>DP00554      279      0
>DP00554      280      0
>DP00554      281      0
>DP00554      282      0
>DP00554      283      0
>DP00554      284      0
>DP00554      285      0
>DP00554      286      0
>DP00554      287      0
>DP00554      288      0
>DP00554      289      0
>DP00554      290      0
>DP00554      291      0
>DP00554      292      0
>DP00554      293      0
>DP00554      294      0
>DP00554      295      0
>DP00554      296      0
>DP00554      297      0
>DP00554      298      0
>DP00554      299      0
>DP00554      300      0
>DP00554      301      0
>DP00554      302      0
>DP00554      303      0
>DP00554      304      0
>DP00554      305      0
>DP00554      306      0
>DP00554      307      0
>DP00554      308      0
>DP00554      309      0
>DP00554      310      0
>DP00554      311      0
>DP00554      312      0
>DP00554      313      0
>DP00554      314      0
>DP00554      315      0
>DP00554      316      0
>DP00554      317      0
>DP00554      318      0
>DP00554      319      0
>DP00554      320      0
>DP00554      321      0
>DP00554      322      0
>DP00554      323      0
>DP00554      324      0
>DP00554      325      0
>DP00554      326      0
>DP00554      327      0
>DP00554      328      0
>DP00554      329      0
>DP00554      330      0
>DP00554      331      0
>DP00554      332      0
>DP00554      333      0
>DP00554      334      0
>DP00554      335      0
>DP00554      336      0
>DP00554      337      0
>DP00554      338      0
>DP00554      339      0
>DP00554      340      0
>DP00554      341      0
>DP00554      342      0
>DP00554      343      0
>DP00554      344      0
>DP00554      345      0
>DP00554      346      0
>DP00554      347      0
>DP00554      348      0
>DP00554      349      0
>DP00554      350      0
>DP00554      351      0
>DP00554      352      0
>DP00554      353      0
>DP00554      354      0
>DP00554      355      0
>DP00554      356      0
>DP00554      357      0
>DP00554      358      0
>DP00554      359      0
>DP00554      360      0
>DP00554      361      0
>DP00554      362      0
>DP00554      363      0
>DP00554      364      0
>DP00554      365      0
>DP00554      366      0
>DP00554      367      0
>DP00554      368      0
>DP00554      369      0
>DP00554      370      0
>DP00554      371      0
>DP00554      372      0
>DP00554      373      0
>DP00554      374      0
>DP00554      375      0
>DP00554      376      0
>DP00554      377      0
>DP00554      378      0
>DP00554      379      0
>DP00554      380      0
>DP00554      381      0
>DP00554      382      0
>DP00554      383      0
>DP00554      384      0
>DP00554      385      0
>DP00554      386      0
>DP00554      387      0
>DP00554      388      0
>DP00554      389      0
>DP00554      390      0
>DP00554      391      0
>DP00554      392      0
>DP00554      393      0
>DP00554      394      0
>DP00554      395      0
>DP00554      396      0
>DP00554      397      0
>DP00554      398      0
>DP00554      399      0
>DP00554      400      0
>DP00554      401      0
>DP00554      402      0
>DP00554      403      0
>DP00554      404      0
>DP00554      405      0
>DP00554      406      0
>DP00554      407      0
>DP00554      408      0
>DP00554      409      0
>DP00554      410      0
>DP00554      411      0
>DP00554      412      0
>DP00554      413      0
>DP00554      414      0
>DP00554      415      0
>DP00554      416      0
>DP00554      417      0
>DP00554      418      0
>DP00554      419      0
>DP00554      420      0
>DP00554      421      0
>DP00554      422      0
>DP00554      423      0
>DP00554      424      0
>DP00554      425      0
>DP00554      426      0
>DP00554      427      0
>DP00554      428      0
>DP00554      429      0
>DP00554      430      0
>DP00554      431      0
>DP00554      432      0
>DP00554      433      0
>DP00554      434      0
>DP00554      435      0
>DP00554      436      0
>DP00554      437      0
>DP00554      438      0
>DP00554      439      0
>DP00554      440      0
>DP00554      441      0
>DP00554      442      0
>DP00554      443      0
>DP00554      444      0
>DP00554      445      0
>DP00554      446      0
>DP00554      447      0
>DP00554      448      0
>DP00554      449      0
>DP00554      450      0
>DP00554      451      0
>DP00554      452      0
>DP00554      453      0
>DP00554      454      0
>DP00554      455      0
>DP00554      456      0
>DP00554      457      0
>DP00554      458      0
>DP00554      459      0
>DP00554      460      0
>DP00554      461      0
>DP00554      462      0
>DP00554      463      0
>DP00554      464      0
>DP00554      465      0
>DP00554      466      0
>DP00554      467      0
>DP00554      468      0
>DP00554      469      0
>DP00554      470      0
>DP00554      471      0
>DP00554      472      0
>DP00554      473      0
>DP00554      474      0
>DP00554      475      0
>DP00554      476      0
>DP00554      477      0
>DP00554      478      0
>DP00554      479      0
>DP00554      480      0
>DP00554      481      0
>DP00554      482      0
>DP00554      483      0
>DP00554      484      0
>DP00554      485      0
>DP00554      486      0
>DP00554      487      0
>DP00554      488      0
>DP00554      489      0
>DP00554      490      0
>DP00554      491      0
>DP00554      492      0
>DP00554      493      0
>DP00554      494      0
>DP00554      495      0
>DP00554      496      0
>DP00554      497      0
>DP00554      498      0
>DP00554      499      0
>DP00554      500      0
>DP00554      501      0
>DP00554      502      0
>DP00554      503      0
>DP00554      504      0
>DP00554      505      0
>DP00554      506      0
>DP00554      507      0
>DP00554      508      0
>DP00554      509      0
>DP00554      510      0
>DP00554      511      0
>DP00554      512      0
>DP00554      513      0
>DP00554      514      0
>DP00554      515      0
>DP00554      516      0
>DP00554      517      0
>DP00554      518      0
>DP00554      519      0
>DP00554      520      0
>DP00554      521      0
>DP00554      522      0
>DP00554      523      0
>DP00554      524      0
>DP00554      525      0
>DP00554      526      0
>DP00554      527      0
>DP00554      528      0
>DP00554      529      0
>DP00554      530      0
>DP00554      531      0
>DP00554      532      0
>DP00554      533      0
>DP00554      534      0
>DP00554      535      0
>DP00554      536      0
>DP00554      537      0
>DP00554      538      0
>DP00554      539      0
>DP00554      540      0
>DP00554      541      0
>DP00554      542      0
>DP00554      543      0
>DP00554      544      0
>DP00554      545      0
>DP00554      546      0
>DP00554      547      0
>DP00554      548      0
>DP00554      549      0
>DP00554      550      0
>DP00554      551      0
>DP00554      552      0
>DP00554      553      0
>DP00554      554      0
>DP00554      555      0
>DP00554      556      0
>DP00554      557      0
>DP00554      558      0
>DP00554      559      0
>DP00554      560      0
>DP00554      561      0
>DP00554      562      0
>DP00554      563      0
>DP00554      564      0
>DP00554      565      0
>DP00554      566      0
>DP00554      567      0
>DP00554      568      0
>DP00554      569      0
>DP00554      570      0
>DP00554      571      0
>DP00554      572      0
>DP00554      573      0
>DP00554      574      0
>DP00554      575      0
>DP00554      576      0
>DP00554      577      0
>DP00554      578      0
>DP00554      579      0
>DP00554      580      0
>DP00554      581      0
>DP00554      582      0
>DP00554      583      0
>DP00554      584      0
>DP00554      585      0
>DP00554      586      0
>DP00554      587      0
>DP00554      588      0
>DP00554      589      0
>DP00554      590      0
>DP00554      591      0
>DP00554      592      0
>DP00554      593      0
>DP00554      594      0
>DP00554      595      0
>DP00554      596      0
>DP00554      597      0
>DP00554      598      0
>DP00554      599      0
>DP00554      600      0
>DP00554      601      0
>DP00554      602      0
>DP00554      603      0
>DP00554      604      0
>DP00554      605      0
>DP00554      606      0
>DP00554      607      0
>DP00554      608      0
>DP00554      609      0
>DP00554      610      0
>DP00554      611      0
>DP00554      612      0
>DP00554      613      0
>DP00554      614      0
>DP00554      615      0
>DP00554      616      0
>DP00554      617      0
>DP00554      618      0
>DP00554      619      0
>DP00554      620      0
>DP00554      621      0
>DP00554      622      0
>DP00554      623      0
>DP00554      624      0
>DP00554      625      0
>DP00554      626      0
>DP00554      627      0
>DP00554      628      0
>DP00554      629      0
>DP00554      630      0
>DP00554      631      0
>DP00554      632      0
>DP00554      633      0
>DP00554      634      0
>DP00554      635      0
>DP00554      636      0
>DP00554      637      0
>DP00554      638      0
>DP00554      639      0
>DP00554      640      0
>DP00554      641      0
>DP00554      642      0
>DP00554      643      0
>DP00554      644      0
>DP00554      645      0
>DP00554      646      0
>DP00554      647      0
>DP00554      648      0
>DP00554      649      0
>DP00554      650      0
>DP00554      651      0
>DP00554      652      0
>DP00554      653      0
>DP00554      654      0
>DP00554      655      0
>DP00554      656      0
>DP00554      657      0
>DP00554      658      0
>DP00554      659      0
>DP00554      660      0
>DP00554      661      0
>DP00554      662      0
>DP00554      663      0
>DP00554      664      0
>DP00554      665      0
>DP00554      666      0
>DP00554      667      0
>DP00554      668      0
>DP00554      669      0
>DP00554      670      0
>DP00554      671      0
>DP00554      672      0
>DP00554      673      0
>DP00554      674      0
>DP00554      675      0
>DP00554      676      0
>DP00554      677      0
>DP00554      678      0
>DP00554      679      0
>DP00554      680      0
>DP00554      681      0
>DP00554      682      0
>DP00554      683      0
>DP00554      684      0
>DP00554      685      0
>DP00554      686      0
>DP00554      687      0
>DP00554      688      0
>DP00554      689      0
>DP00554      690      0
>DP00554      691      0
>DP00554      692      0
>DP00554      693      0
>DP00554      694      0
>DP00554      695      0
>DP00554      696      0
>DP00554      697      0
>DP00554      698      0
>DP00554      699      0
>DP00554      700      0
>DP00554      701      0
>DP00554      702      0
>DP00554      703      0
>DP00554      704      0
>DP00554      705      0
>DP00554      706      0
>DP00554      707      0
>DP00554      708      0
>DP00554      709      0
>DP00554      710      0
>DP00554      711      0
>DP00554      712      0
>DP00554      713      0
>DP00554      714      0
>DP00554      715      0
>DP00554      716      0
>DP00554      717      0
>DP00554      718      0
>DP00554      719      0
>DP00554      720      0
>DP00554      721      0
>DP00554      722      0
>DP00554      723      0
>DP00554      724      0
>DP00554      725      0
>DP00554      726      0
>DP00554      727      0
>DP00554      728      0
>DP00554      729      0
>DP00554      730      0
>DP00554      731      0
>DP00554      732      0
>DP00554      733      0
>DP00554      734      0
>DP00554      735      0
>DP00554      736      0
>DP00554      737      0
>DP00554      738      0
>DP00554      739      0
>DP00554      740      0
>DP00554      741      0
>DP00554      742      0
>DP00554      743      0
>DP00554      744      0
>DP00554      745      0
>DP00554      746      0
>DP00554      747      0
>DP00554      748      0
>DP00554      749      0
>DP00554      750      0
>DP00554      751      0
>DP00554      752      0
>DP00554      753      0
>DP00554      754      0
>DP00554      755      0
>DP00554      756      0
>DP00554      757      0
>DP00554      758      0
>DP00554      759      0
>DP00554      760      0
>DP00554      761      0
>DP00554      762      0
>DP00554      763      0
>DP00554      764      0
>DP00554      765      0
>DP00554      766      0
>DP00554      767      0
>DP00554      768      0
>DP00554      769      0
>DP00554      770      0
>DP00554      771      0
>DP00554      772      0
>DP00554      773      0
>DP00554      774      0
>DP00554      775      0
>DP00554      776      0
>DP00554      777      0
>DP00554      778      0
>DP00554      779      0
>DP00554      780      0
>DP00554      781      0
>DP00554      782      0
>DP00554      783      0
>DP00554      784      0
>DP00554      785      0
>DP00554      786      0
>DP00554      787      0
>DP00554      788      0
>DP00554      789      0
>DP00554      790      0
>DP00554      791      0
>DP00554      792      0
>DP00554      793      0
>DP00554      794      0
>DP00554      795      0
>DP00554      796      0
>DP00554      797      0
>DP00554      798      0
>DP00554      799      0
>DP00554      800      0
>DP00554      801      0
>DP00554      802      0
>DP00554      803      0
>DP00554      804      0
>DP00554      805      0
>DP00554      806      0
>DP00554      807      0
>DP00554      808      0
>DP00554      809      0
>DP00554      810      0
>DP00554      811      0
>DP00554      812      0
>DP00554      813      0
>DP00554      814      0
>DP00554      815      0
>DP00554      816      0
>DP00554      817      0
>DP00554      818      0
>DP00554      819      0
>DP00554      820      0
>DP00554      821      0
>DP00554      822      0
>DP00554      823      0
>DP00554      824      0
>DP00554      825      0
>DP00554      826      0
>DP00554      827      0
>DP00554      828      0
>DP00554      829      0
>DP00554      830      0
>DP00554      831      0
>DP00554      832      0
>DP00554      833      0
>DP00554      834      0
>DP00554      835      0
>DP00554      836      0
>DP00554      837      0
>DP00554      838      0
>DP00554      839      0
>DP00554      840      0
>DP00554      841      0
>DP00554      842      0
>DP00554      843      0
>DP00554      844      0
>DP00554      845      0
>DP00554      846      0
>DP00554      847      0
>DP00554      848      0
>DP00554      849      0
>DP00554      850      0
>DP00554      851      0
>DP00554      852      0
>DP00554      853      0
>DP00554      854      0
>DP00554      855      0
>DP00554      856      0
>DP00554      857      0
>DP00554      858      0
>DP00554      859      0
>DP00554      860      0
>DP00554      861      0
>DP00554      862      0
>DP00554      863      0
>DP00554      864      0
>DP00554      865      0
>DP00554      866      0
>DP00554      867      0
>DP00554      868      0
>DP00554      869      0
>DP00554      870      0
>DP00554      871      0
>DP00554      872      0
>DP00554      873      0
>DP00554      874      0
>DP00554      875      0
>DP00554      876      0
>DP00554      877      0
>DP00554      878      0
>DP00554      879      0
>DP00554      880      0
>DP00554      881      0
>DP00554      882      0
>DP00554      883      0
>DP00554      884      0
>DP00554      885      0
>DP00554      886      0
>DP00554      887      0
>DP00554      888      0
>DP00554      889      0
>DP00554      890      0
>DP00554      891      0
>DP00554      892      0
>DP00554      893      0
>DP00554      894      0
>DP00554      895      0
>DP00554      896      0
>DP00554      897      0
>DP00554      898      0
>DP00554      899      0
>DP00554      900      0
>DP00554      901      0
>DP00554      902      0
>DP00554      903      0
>DP00554      904      0
>DP00554      905      0
>DP00554      906      0
>DP00554      907      0
>DP00554      908      0
>DP00554      909      0
>DP00554      910      0
>DP00554      911      0
>DP00554      912      0
>DP00554      913      0
>DP00554      914      0
>DP00554      915      0
>DP00554      916      0
>DP00554      917      0
>DP00554      918      0
>DP00554      919      0
>DP00554      920      0
>DP00554      921      0
>DP00554      922      0
>DP00554      923      0
>DP00554      924      0
>DP00554      925      0
>DP00554      926      0
>DP00554      927      0
>DP00554      928      0
>DP00554      929      0
>DP00554      930      0
>DP00554      931      0
>DP00554      932      0
>DP00554      933      0
>DP00554      934      0
>DP00554      935      0
>DP00554      936      0
>DP00554      937      0
>DP00554      938      0
>DP00554      939      0
>DP00554      940      0
>DP00554      941      0
>DP00554      942      0
>DP00554      943      0
>DP00554      944      0
>DP00554      945      0
>DP00554      946      0
>DP00554      947      0
>DP00554      948      0
>DP00554      949      0
>DP00554      950      0
>DP00554      951      0
>DP00554      952      0
>DP00554      953      0
>DP00554      954      0
>DP00554      955      0
>DP00554      956      0
>DP00554      957      0
>DP00554      958      0
>DP00554      959      0
>DP00554      960      0
>DP00554      961      0
>DP00554      962      0
>DP00554      963      0
>DP00554      964      0
>DP00554      965      0
>DP00554      966      0
>DP00554      967      0
>DP00554      968      0
>DP00554      969      0
>DP00554      970      0
>DP00554      971      0
>DP00554      972      0
>DP00554      973      0
>DP00554      974      0
>DP00554      975      0
>DP00554      976      0
>DP00554      977      0
>DP00554      978      0
>DP00554      979      0
>DP00554      980      0
>DP00554      981      0
>DP00554      982      0
>DP00554      983      0
>DP00554      984      0
>DP00554      985      0
>DP00554      986      0
>DP00554      987      0
>DP00554      988      0
>DP00554      989      0
>DP00554      990      0
>DP00554      991      0
>DP00554      992      0
>DP00554      993      0
>DP00554      994      0
>DP00554      995      0
>DP00554      996      0
>DP00554      997      0
>DP00554      998      0
>DP00554      999      0
>DP00554      1000      0
>DP00554      1001      0
>DP00554      1002      0
>DP00554      1003      0
>DP00554      1004      0
>DP00554      1005      0
>DP00554      1006      0
>DP00554      1007      0
>DP00554      1008      0
>DP00554      1009      0
>DP00554      1010      0
>DP00554      1011      0
>DP00554      1012      0
>DP00554      1013      0
>DP00554      1014      0
>DP00554      1015      0
>DP00554      1016      0
>DP00554      1017      0
>DP00554      1018      0
>DP00554      1019      0
>DP00554      1020      0
>DP00554      1021      0
>DP00554      1022      0
>DP00554      1023      0
>DP00554      1024      0
>DP00554      1025      0
>DP00554      1026      0
>DP00554      1027      0
>DP00554      1028      0
>DP00554      1029      0
>DP00554      1030      0
>DP00554      1031      0
>DP00554      1032      0
>DP00554      1033      0
>DP00554      1034      0
>DP00554      1035      0
>DP00554      1036      0
>DP00554      1037      0
>DP00554      1038      0
>DP00554      1039      0
>DP00554      1040      0
>DP00554      1041      0
>DP00554      1042      0
>DP00554      1043      0
>DP00554      1044      0
>DP00554      1045      0
>DP00554      1046      0
>DP00554      1047      0
>DP00554      1048      0
>DP00554      1049      0
>DP00554      1050      0
>DP00554      1051      0
>DP00554      1052      0
>DP00554      1053      0
>DP00554      1054      0
>DP00554      1055      0
>DP00554      1056      0
>DP00554      1057      0
>DP00554      1058      0
>DP00554      1059      0
>DP00554      1060      0
>DP00554      1061      0
>DP00554      1062      0
>DP00554      1063      0
>DP00554      1064      0
>DP00554      1065      0
>DP00554      1066      0
>DP00554      1067      0
>DP00554      1068      0
>DP00554      1069      0
>DP00554      1070      0
>DP00554      1071      0
>DP00554      1072      0
>DP00554      1073      0
>DP00554      1074      0
>DP00554      1075      0
>DP00554      1076      0
>DP00554      1077      0
>DP00554      1078      0
>DP00554      1079      0
>DP00554      1080      0
>DP00554      1081      0
>DP00554      1082      0
>DP00554      1083      0
>DP00554      1084      0
>DP00554      1085      0
>DP00554      1086      0
>DP00554      1087      0
>DP00554      1088      0
>DP00554      1089      0
>DP00554      1090      0
>DP00554      1091      0
>DP00554      1092      0
>DP00554      1093      0
>DP00554      1094      0
>DP00554      1095      0
>DP00554      1096      0
>DP00554      1097      0
>DP00554      1098      0
>DP00554      1099      0
>DP00554      1100      0
>DP00554      1101      0
>DP00554      1102      0
>DP00554      1103      0
>DP00554      1104      0
>DP00554      1105      0
>DP00554      1106      0
>DP00554      1107      0
>DP00554      1108      0
>DP00554      1109      0
>DP00554      1110      0
>DP00554      1111      0
>DP00554      1112      0
>DP00554      1113      0
>DP00554      1114      0
>DP00554      1115      0
>DP00554      1116      0
>DP00554      1117      0
>DP00554      1118      0
>DP00554      1119      0
>DP00554      1120      0
>DP00554      1121      0
>DP00554      1122      0
>DP00554      1123      0
>DP00554      1124      0
>DP00554      1125      0
>DP00554      1126      0
>DP00554      1127      0
>DP00554      1128      0
>DP00554      1129      0
>DP00554      1130      0
>DP00554      1131      0
>DP00554      1132      0
>DP00554      1133      0
>DP00554      1134      0
>DP00554      1135      0
>DP00554      1136      0
>DP00554      1137      0
>DP00554      1138      0
>DP00554      1139      0
>DP00554      1140      0
>DP00554      1141      0
>DP00554      1142      0
>DP00554      1143      0
>DP00554      1144      0
>DP00554      1145      0
>DP00554      1146      0
>DP00554      1147      0
>DP00554      1148      0
>DP00554      1149      0
>DP00554      1150      0
>DP00554      1151      0
>DP00554      1152      0
>DP00554      1153      0
>DP00554      1154      0
>DP00554      1155      0
>DP00554      1156      0
>DP00554      1157      0
>DP00554      1158      0
>DP00554      1159      0
>DP00554      1160      0
>DP00554      1161      0
>DP00554      1162      0
>DP00554      1163      0
>DP00554      1164      0
>DP00554      1165      0
>DP00554      1166      0
>DP00554      1167      0
>DP00554      1168      0
>DP00554      1169      0
>DP00554      1170      0
>DP00554      1171      0
>DP00554      1172      0
>DP00554      1173      0
>DP00554      1174      0
>DP00554      1175      0
>DP00554      1176      0
>DP00554      1177      0
>DP00554      1178      0
>DP00554      1179      0
>DP00554      1180      0
>DP00554      1181      0
>DP00554      1182      0
>DP00554      1183      0
>DP00554      1184      0
>DP00554      1185      0
>DP00554      1186      0
>DP00554      1187      0
>DP00554      1188      0
>DP00554      1189      0
>DP00554      1190      0
>DP00554      1191      0
>DP00554      1192      0
>DP00554      1193      0
>DP00554      1194      0
>DP00554      1195      0
>DP00554      1196      0
>DP00554      1197      0
>DP00554      1198      0
>DP00554      1199      0
>DP00554      1200      0
>DP00554      1201      0
>DP00554      1202      0
>DP00554      1203      0
>DP00554      1204      0
>DP00554      1205      0
>DP00554      1206      0
>DP00554      1207      0
>DP00554      1208      0
>DP00554      1209      0
>DP00554      1210      0
>DP00554      1211      0
>DP00554      1212      0
>DP00554      1213      0
>DP00554      1214      0
>DP00554      1215      0
>DP00554      1216      0
>DP00554      1217      0
>DP00554      1218      0
>DP00554      1219      0
>DP00554      1220      0
>DP00554      1221      0
>DP00554      1222      0
>DP00554      1223      0
>DP00554      1224      0
>DP00554      1225      0
>DP00554      1226      0
>DP00554      1227      0
>DP00554      1228      0
>DP00554      1229      0
>DP00554      1230      0
>DP00554      1231      0
>DP00554      1232      0
>DP00554      1233      0
>DP00554      1234      0
>DP00554      1235      0
>DP00554      1236      0
>DP00554      1237      0
>DP00554      1238      0
>DP00554      1239      0
>DP00554      1240      0
>DP00554      1241      0
>DP00554      1242      0
>DP00554      1243      0
>DP00554      1244      0
>DP00554      1245      0
>DP00554      1246      0
>DP00554      1247      0
>DP00554      1248      0
>DP00554      1249      0
>DP00554      1250      0
>DP00554      1251      0
>DP00554      1252      0
>DP00554      1253      0
>DP00554      1254      0
>DP00554      1255      0
>DP00554      1256      0
>DP00554      1257      0
>DP00554      1258      0
>DP00554      1259      0
>DP00554      1260      0
>DP00554      1261      0
>DP00554      1262      0
>DP00554      1263      0
>DP00554      1264      0
>DP00554      1265      0
>DP00554      1266      0
>DP00554      1267      0
>DP00554      1268      0
>DP00554      1269      0
>DP00554      1270      0
>DP00554      1271      0
>DP00554      1272      0
>DP00554      1273      0
>DP00554      1274      0
>DP00554      1275      0
>DP00554      1276      0
>DP00554      1277      0
>DP00554      1278      0
>DP00554      1279      0
>DP00554      1280      0
>DP00554      1281      0
>DP00554      1282      0
>DP00554      1283      0
>DP00554      1284      0
>DP00554      1285      0
>DP00554      1286      0
>DP00554      1287      0
>DP00554      1288      0
>DP00554      1289      0
>DP00554      1290      0
>DP00554      1291      0
>DP00554      1292      0
>DP00554      1293      0
>DP00554      1294      0
>DP00554      1295      0
>DP00554      1296      0
>DP00554      1297      0
>DP00554      1298      0
>DP00554      1299      0
>DP00554      1300      0
>DP00554      1301      0
>DP00554      1302      0
>DP00554      1303      0
>DP00554      1304      0
>DP00554      1305      0
>DP00554      1306      0
>DP00554      1307      0
>DP00554      1308      0
>DP00554      1309      0
>DP00554      1310      0
>DP00554      1311      0
>DP00554      1312      0
>DP00554      1313      0
>DP00554      1314      0
>DP00554      1315      0
>DP00554      1316      0
>DP00554      1317      0
>DP00554      1318      0
>DP00554      1319      0
>DP00554      1320      0
>DP00554      1321      0
>DP00554      1322      0
>DP00554      1323      0
>DP00554      1324      0
>DP00554      1325      0
>DP00554      1326      0
>DP00554      1327      0
>DP00554      1328      0
>DP00554      1329      0
>DP00554      1330      0
>DP00554      1331      0
>DP00554      1332      0
>DP00554      1333      0
>DP00554      1334      0
>DP00554      1335      0
>DP00554      1336      0
>DP00554      1337      0
>DP00554      1338      0
>DP00554      1339      0
>DP00554      1340      0
>DP00554      1341      0
>DP00554      1342      0
>DP00554      1343      0
>DP00554      1344      0
>DP00554      1345      0
>DP00554      1346      0
>DP00554      1347      0
>DP00554      1348      0
>DP00554      1349      0
>DP00554      1350      0
>DP00554      1351      0
>DP00554      1352      0
>DP00554      1353      0
>DP00554      1354      0
>DP00554      1355      0
>DP00554      1356      0
>DP00554      1357      0
>DP00554      1358      0
>DP00554      1359      0
>DP00554      1360      0
>DP00554      1361      0
>DP00554      1362      0
>DP00554      1363      0
>DP00554      1364      0
>DP00554      1365      0
>DP00554      1366      0
>DP00554      1367      0
>DP00554      1368      0
>DP00554      1369      0
>DP00554      1370      0
>DP00554      1371      0
>DP00554      1372      0
>DP00554      1373      0
>DP00554      1374      0
>DP00554      1375      0
>DP00554      1376      0
>DP00554      1377      0
>DP00554      1378      0
>DP00554      1379      0
>DP00554      1380      0
>DP00554      1381      0
>DP00554      1382      0
>DP00554      1383      0
>DP00554      1384      0
>DP00554      1385      0
>DP00554      1386      0
>DP00554      1387      0
>DP00554      1388      0
>DP00554      1389      0
>DP00554      1390      0
>DP00554      1391      0
>DP00554      1392      0
>DP00554      1393      0
>DP00554      1394      0
>DP00554      1395      0
>DP00554      1396      0
>DP00554      1397      0
>DP00554      1398      0
>DP00554      1399      0
>DP00554      1400      0
>DP00554      1401      0
>DP00554      1402      0
>DP00554      1403      0
>DP00554      1404      0
>DP00554      1405      0
>DP00554      1406      0
>DP00554      1407      0
>DP00554      1408      0
>DP00554      1409      0
>DP00554      1410      0
>DP00554      1411      0
>DP00554      1412      0
>DP00554      1413      0
>DP00554      1414      0
>DP00554      1415      0
>DP00554      1416      0
>DP00554      1417      0
>DP00554      1418      0
>DP00554      1419      0
>DP00554      1420      0
>DP00554      1421      0
>DP00554      1422      0
>DP00554      1423      0
>DP00554      1424      0
>DP00554      1425      0
>DP00554      1426      0
>DP00554      1427      0
>DP00554      1428      0
>DP00554      1429      0
>DP00554      1430      0
>DP00554      1431      0
>DP00554      1432      0
>DP00554      1433      0
>DP00554      1434      0
>DP00554      1435      0
>DP00554      1436      0
>DP00554      1437      0
>DP00554      1438      0
>DP00554      1439      0
>DP00554      1440      0
>DP00554      1441      0
>DP00554      1442      0
>DP00554      1443      0
>DP00554      1444      0
>DP00554      1445      0
>DP00554      1446      0
>DP00554      1447      0
>DP00554      1448      0
>DP00554      1449      0
>DP00554      1450      0
>DP00554      1451      0
>DP00554      1452      0
>DP00554      1453      0
>DP00554      1454      0
>DP00554      1455      0
>DP00554      1456      0
>DP00554      1457      0
>DP00554      1458      0
>DP00554      1459      0
>DP00554      1460      0
>DP00554      1461      0
>DP00554      1462      0
>DP00554      1463      0
>DP00554      1464      0
>DP00554      1465      0
>DP00554      1466      0
>DP00554      1467      0
>DP00554      1468      0
>DP00554      1469      0
>DP00554      1470      0
>DP00554      1471      0
>DP00554      1472      0
>DP00554      1473      0
>1wk0_A      1      0
>1wk0_A      2      0
>1wk0_A      3      0
>1wk0_A      4      0
>1wk0_A      5      0
>1wk0_A      6      0
>1wk0_A      7      0
>1wk0_A      8      0
>1wk0_A      9      0
>1wk0_A      10      0
>1wk0_A      11      0
>1wk0_A      12      0
>1wk0_A      13      0
>1wk0_A      14      0
>1wk0_A      15      0
>1wk0_A      16      0
>1wk0_A      17      0
>1wk0_A      18      0
>1wk0_A      19      0
>1wk0_A      20      0
>1wk0_A      21      0
>1wk0_A      22      0
>1wk0_A      23      0
>1wk0_A      24      0
>1wk0_A      25      0
>1wk0_A      26      0
>1wk0_A      27      0
>1wk0_A      28      0
>1wk0_A      29      0
>1wk0_A      30      0
>1wk0_A      31      0
>1wk0_A      32      0
>1wk0_A      33      0
>1wk0_A      34      0
>1wk0_A      35      0
>1wk0_A      36      0
>1wk0_A      37      0
>1wk0_A      38      0
>1wk0_A      39      0
>1wk0_A      40      0
>1wk0_A      41      0
>1wk0_A      42      0
>1wk0_A      43      0
>1wk0_A      44      0
>1wk0_A      45      0
>1wk0_A      46      0
>1wk0_A      47      0
>1wk0_A      48      0
>1wk0_A      49      0
>1wk0_A      50      0
>1wk0_A      51      0
>1wk0_A      52      0
>1wk0_A      53      0
>1wk0_A      54      0
>1wk0_A      55      0
>1wk0_A      56      0
>1wk0_A      57      0
>1wk0_A      58      0
>1wk0_A      59      0
>1wk0_A      60      0
>1wk0_A      61      0
>1wk0_A      62      0
>1wk0_A      63      0
>1wk0_A      64      0
>1wk0_A      65      0
>1wk0_A      66      0
>1wk0_A      67      0
>1wk0_A      68      0
>1wk0_A      69      0
>1wk0_A      70      0
>1wk0_A      71      0
>1wk0_A      72      0
>1wk0_A      73      0
>1wk0_A      74      0
>1wk0_A      75      0
>1wk0_A      76      0
>1wk0_A      77      0
>1wk0_A      78      0
>1wk0_A      79      0
>1wk0_A      80      0
>1wk0_A      81      0
>1wk0_A      82      0
>1wk0_A      83      0
>1wk0_A      84      0
>1wk0_A      85      0
>1wk0_A      86      0
>1wk0_A      87      0
>1wk0_A      88      0
>1wk0_A      89      0
>1wk0_A      90      0
>1wk0_A      91      0
>1wk0_A      92      0
>1wk0_A      93      0
>1wk0_A      94      0
>1wk0_A      95      0
>1wk0_A      96      0
>1wk0_A      97      0
>1wk0_A      98      0
>1wk0_A      99      0
>1wk0_A      100      0
>1wk0_A      101      0
>1wk0_A      102      0
>1wk0_A      103      0
>1wk0_A      104      0
>1wk0_A      105      0
>1wk0_A      106      0
>1wk0_A      107      0
>1wk0_A      108      0
>1wk0_A      109      0
>1wk0_A      110      0
>1wk0_A      111      0
>1wk0_A      112      0
>1wk0_A      113      0
>1wk0_A      114      0
>1wk0_A      115      0
>1wk0_A      116      0
>1wk0_A      117      0
>1wk0_A      118      0
>1wk0_A      119      0
>1wk0_A      120      0
>1wk0_A      121      0
>1wk0_A      122      0
>1wk0_A      123      0
>1wk0_A      124      0
>1wk0_A      125      0
>1wk0_A      126      0
>1wk0_A      127      0
>1wk0_A      128      0
>1wk0_A      129      0
>1wk0_A      130      0
>1wk0_A      131      0
>1wk0_A      132      0
>1wk0_A      133      0
>1wk0_A      134      0
>1wk0_A      135      0
>1wk0_A      136      0
>1wk0_A      137      0
>DP00111      1      1
>DP00111      2      1
>DP00111      3      1
>DP00111      4      1
>DP00111      5      1
>DP00111      6      1
>DP00111      7      1
>DP00111      8      1
>DP00111      9      1
>DP00111      10      1
>DP00111      11      1
>DP00111      12      1
>DP00111      13      1
>DP00111      14      1
>DP00111      15      1
>DP00111      16      1
>DP00111      17      1
>DP00111      18      1
>DP00111      19      1
>DP00111      20      1
>DP00111      21      1
>DP00111      22      1
>DP00111      23      1
>DP00111      24      1
>DP00111      25      1
>DP00111      26      1
>DP00111      27      1
>DP00111      28      1
>DP00111      29      1
>DP00111      30      1
>DP00111      31      1
>DP00111      32      1
>DP00111      33      1
>DP00111      34      1
>DP00111      35      1
>DP00111      36      1
>DP00111      37      1
>DP00111      38      1
>DP00111      39      1
>DP00111      40      1
>DP00111      41      1
>DP00111      42      1
>DP00111      43      1
>DP00111      44      1
>DP00111      45      1
>DP00111      46      1
>DP00111      47      1
>DP00111      48      1
>DP00111      49      1
>DP00111      50      0
>DP00111      51      0
>DP00111      52      0
>DP00111      53      0
>DP00111      54      0
>DP00111      55      0
>DP00111      56      0
>DP00111      57      0
>DP00111      58      0
>DP00111      59      0
>DP00111      60      0
>DP00111      61      0
>DP00111      62      0
>DP00111      63      0
>DP00111      64      0
>DP00111      65      0
>DP00111      66      0
>DP00111      67      0
>DP00111      68      0
>DP00111      69      0
>DP00111      70      0
>DP00111      71      0
>DP00111      72      0
>DP00111      73      0
>DP00111      74      0
>DP00111      75      0
>DP00111      76      0
>DP00111      77      0
>DP00111      78      0
>DP00111      79      0
>DP00111      80      0
>DP00111      81      0
>DP00111      82      0
>DP00111      83      0
>DP00111      84      0
>DP00111      85      0
>DP00111      86      0
>DP00111      87      0
>DP00111      88      0
>DP00111      89      0
>DP00111      90      0
>DP00111      91      0
>DP00111      92      0
>DP00111      93      0
>DP00111      94      0
>DP00111      95      0
>DP00111      96      0
>DP00111      97      0
>DP00111      98      0
>DP00111      99      0
>DP00111      100      0
>DP00111      101      0
>DP00111      102      0
>DP00111      103      0
>DP00111      104      0
>DP00111      105      0
>DP00111      106      0
>DP00111      107      0
>DP00111      108      0
>DP00111      109      0
>DP00111      110      0
>DP00111      111      0
>DP00111      112      0
>DP00111      113      0
>DP00111      114      0
>DP00111      115      0
>DP00111      116      0
>DP00111      117      0
>DP00111      118      0
>DP00111      119      0
>DP00111      120      0
>DP00111      121      0
>DP00111      122      0
>DP00111      123      0
>DP00111      124      0
>DP00111      125      0
>DP00111      126      0
>DP00111      127      0
>DP00111      128      0
>DP00111      129      0
>DP00111      130      0
>DP00111      131      0
>DP00111      132      0
>DP00111      133      0
>DP00111      134      0
>DP00111      135      0
>DP00111      136      0
>DP00111      137      0
>DP00111      138      0
>DP00111      139      0
>DP00111      140      0
>DP00111      141      0
>DP00111      142      0
>DP00111      143      0
>DP00111      144      0
>DP00111      145      0
>DP00111      146      0
>DP00111      147      0
>DP00111      148      0
>DP00111      149      0
>DP00111      150      0
>DP00111      151      0
>DP00111      152      0
>DP00111      153      0
>DP00111      154      0
>DP00111      155      0
>DP00111      156      0
>DP00111      157      0
>DP00111      158      0
>DP00111      159      0
>DP00111      160      0
>DP00111      161      0
>DP00111      162      0
>DP00111      163      0
>DP00111      164      0
>DP00111      165      0
>DP00111      166      0
>DP00111      167      0
>DP00111      168      0
>DP00111      169      0
>DP00111      170      0
>DP00111      171      0
>DP00111      172      0
>DP00111      173      0
>DP00111      174      0
>DP00111      175      0
>DP00111      176      0
>DP00111      177      0
>DP00111      178      0
>DP00111      179      0
>DP00111      180      0
>DP00111      181      0
>DP00111      182      0
>DP00111      183      0
>DP00111      184      0
>DP00111      185      0
>DP00111      186      0
>DP00111      187      0
>DP00111      188      0
>DP00111      189      0
>DP00111      190      0
>DP00111      191      0
>DP00111      192      0
>DP00111      193      0
>DP00111      194      0
>DP00111      195      0
>DP00111      196      0
>DP00111      197      0
>DP00111      198      0
>DP00111      199      0
>DP00111      200      0
>DP00111      201      0
>DP00111      202      0
>DP00111      203      0
>DP00111      204      0
>DP00111      205      0
>DP00111      206      0
>DP00111      207      0
>DP00111      208      0
>DP00111      209      0
>DP00111      210      0
>DP00111      211      0
>DP00111      212      0
>DP00111      213      0
>DP00111      214      0
>DP00111      215      0
>DP00111      216      0
>DP00111      217      0
>DP00111      218      0
>DP00111      219      0
>DP00111      220      0
>DP00111      221      0
>DP00111      222      0
>DP00111      223      0
>DP00111      224      0
>DP00111      225      0
>DP00111      226      0
>DP00111      227      0
>DP00111      228      0
>DP00111      229      0
>DP00111      230      0
>DP00111      231      0
>DP00111      232      0
>DP00111      233      0
>DP00111      234      0
>DP00111      235      0
>DP00111      236      0
>DP00111      237      0
>DP00111      238      0
>DP00111      239      0
>DP00111      240      0
>DP00111      241      0
>DP00111      242      0
>DP00111      243      0
>DP00111      244      1
>DP00111      245      1
>DP00111      246      1
>DP00111      247      1
>DP00111      248      1
>DP00111      249      1
>DP00111      250      1
>DP00111      251      1
>DP00111      252      1
>DP00111      253      1
>DP00111      254      1
>DP00111      255      1
>DP00111      256      1
>DP00111      257      1
>DP00111      258      1
>DP00111      259      1
>DP00111      260      1
>DP00111      261      1
>DP00111      262      1
>DP00111      263      1
>DP00111      264      1
>DP00111      265      1
>DP00111      266      1
>DP00111      267      1
>DP00111      268      1
>DP00111      269      1
>DP00111      270      1
>DP00111      271      1
>DP00111      272      1
>DP00111      273      1
>DP00111      274      1
>DP00111      275      1
>DP00111      276      1
>DP00111      277      1
>DP00111      278      1
>DP00111      279      1
>DP00111      280      1
>DP00111      281      1
>DP00111      282      1
>DP00111      283      1
>DP00111      284      1
>DP00111      285      1
>DP00111      286      1
>DP00111      287      1
>DP00111      288      1
>DP00111      289      1
>DP00111      290      1
>DP00111      291      1
>DP00111      292      1
>DP00111      293      1
>DP00111      294      1
>DP00111      295      1
>DP00111      296      1
>DP00111      297      1
>DP00111      298      1
>DP00111      299      1
>DP00111      300      1
>DP00111      301      1
>DP00111      302      0
>DP00111      303      0
>DP00111      304      0
>DP00111      305      0
>DP00111      306      0
>DP00111      307      0
>DP00111      308      0
>DP00111      309      0
>DP00111      310      0
>DP00111      311      0
>DP00111      312      0
>DP00111      313      0
>DP00111      314      0
>DP00111      315      0
>DP00111      316      0
>DP00111      317      0
>DP00111      318      0
>DP00111      319      0
>DP00111      320      0
>DP00111      321      0
>DP00111      322      0
>DP00111      323      0
>DP00111      324      0
>DP00111      325      0
>DP00111      326      0
>DP00111      327      0
>DP00111      328      0
>DP00111      329      0
>DP00111      330      0
>DP00111      331      0
>DP00111      332      0
>DP00111      333      0
>DP00111      334      0
>DP00111      335      0
>DP00111      336      0
>DP00111      337      0
>DP00111      338      0
>DP00111      339      0
>DP00111      340      0
>DP00111      341      0
>DP00111      342      0
>DP00111      343      0
>DP00111      344      0
>DP00111      345      0
>DP00111      346      0
>DP00111      347      0
>DP00111      348      0
>DP00111      349      0
>DP00111      350      0
>DP00111      351      0
>DP00111      352      0
>DP00111      353      0
>DP00111      354      0
>DP00111      355      0
>DP00111      356      0
>DP00111      357      0
>DP00111      358      0
>DP00111      359      0
>DP00111      360      0
>DP00111      361      0
>DP00111      362      0
>DP00111      363      0
>DP00111      364      0
>DP00111      365      0
>DP00111      366      0
>DP00111      367      0
>DP00111      368      0
>DP00111      369      0
>DP00111      370      0
>DP00111      371      0
>DP00111      372      0
>DP00111      373      0
>DP00111      374      0
>DP00111      375      0
>DP00111      376      0
>DP00111      377      0
>DP00111      378      0
>DP00111      379      0
>DP00111      380      0
>DP00111      381      0
>DP00111      382      0
>DP00111      383      0
>DP00111      384      0
>DP00111      385      0
>DP00111      386      0
>DP00111      387      0
>DP00111      388      0
>DP00111      389      0
>DP00111      390      0
>DP00111      391      0
>DP00111      392      0
>DP00111      393      0
>DP00111      394      0
>DP00111      395      0
>DP00111      396      0
>DP00111      397      0
>DP00111      398      0
>DP00111      399      0
>DP00111      400      0
>DP00111      401      0
>DP00111      402      0
>DP00111      403      0
>DP00111      404      0
>DP00111      405      0
>DP00111      406      0
>DP00111      407      0
>DP00111      408      0
>DP00111      409      0
>DP00111      410      0
>DP00111      411      0
>DP00111      412      0
>DP00111      413      0
>DP00111      414      0
>DP00111      415      0
>DP00111      416      0
>DP00111      417      0
>DP00111      418      0
>DP00111      419      0
>DP00111      420      0
>DP00111      421      0
>DP00111      422      0
>DP00111      423      0
>DP00111      424      0
>DP00111      425      0
>DP00111      426      0
>DP00111      427      0
>DP00111      428      0
>DP00111      429      0
>DP00111      430      0
>DP00111      431      0
>DP00111      432      0
>DP00111      433      0
>DP00111      434      0
>DP00111      435      0
>DP00111      436      0
>DP00111      437      0
>DP00111      438      0
>DP00111      439      0
>DP00111      440      0
>DP00382      1      1
>DP00382      2      1
>DP00382      3      1
>DP00382      4      1
>DP00382      5      1
>DP00382      6      1
>DP00382      7      1
>DP00382      8      1
>DP00382      9      1
>DP00382      10      1
>DP00382      11      1
>DP00382      12      1
>DP00382      13      1
>DP00382      14      1
>DP00382      15      1
>DP00382      16      1
>DP00382      17      0
>DP00382      18      0
>DP00382      19      0
>DP00382      20      0
>DP00382      21      0
>DP00382      22      0
>DP00382      23      0
>DP00382      24      0
>DP00382      25      0
>DP00382      26      0
>DP00382      27      0
>DP00382      28      0
>DP00382      29      0
>DP00382      30      0
>DP00382      31      0
>DP00382      32      0
>DP00382      33      0
>DP00382      34      0
>DP00382      35      0
>DP00382      36      0
>DP00382      37      0
>DP00382      38      0
>DP00382      39      0
>DP00382      40      0
>DP00382      41      0
>DP00382      42      0
>DP00382      43      0
>DP00382      44      0
>DP00382      45      0
>DP00382      46      0
>DP00382      47      0
>DP00382      48      0
>DP00382      49      0
>DP00382      50      0
>DP00382      51      0
>DP00382      52      0
>DP00382      53      0
>DP00382      54      0
>DP00382      55      0
>DP00382      56      0
>DP00382      57      0
>DP00382      58      0
>DP00382      59      0
>DP00382      60      0
>DP00382      61      0
>DP00382      62      0
>DP00382      63      0
>DP00382      64      0
>DP00382      65      0
>DP00382      66      0
>DP00382      67      0
>DP00382      68      0
>DP00382      69      0
>DP00382      70      0
>DP00382      71      0
>DP00382      72      0
>DP00382      73      0
>DP00382      74      0
>DP00382      75      0
>DP00382      76      0
>DP00382      77      0
>DP00382      78      0
>DP00382      79      1
>DP00382      80      1
>DP00382      81      1
>DP00382      82      1
>DP00382      83      1
>DP00382      84      1
>DP00382      85      1
>DP00382      86      1
>DP00382      87      1
>DP00382      88      1
>DP00382      89      1
>DP00382      90      1
>DP00382      91      1
>DP00382      92      1
>DP00382      93      1
>DP00382      94      1
>DP00382      95      1
>DP00382      96      1
>DP00382      97      1
>DP00382      98      1
>DP00382      99      1
>DP00382      100      1
>DP00382      101      1
>DP00382      102      1
>1wpk_A      1      0
>1wpk_A      2      0
>1wpk_A      3      0
>1wpk_A      4      0
>1wpk_A      5      0
>1wpk_A      6      0
>1wpk_A      7      0
>1wpk_A      8      0
>1wpk_A      9      0
>1wpk_A      10      0
>1wpk_A      11      0
>1wpk_A      12      0
>1wpk_A      13      0
>1wpk_A      14      0
>1wpk_A      15      0
>1wpk_A      16      0
>1wpk_A      17      0
>1wpk_A      18      0
>1wpk_A      19      0
>1wpk_A      20      0
>1wpk_A      21      0
>1wpk_A      22      0
>1wpk_A      23      0
>1wpk_A      24      0
>1wpk_A      25      0
>1wpk_A      26      0
>1wpk_A      27      0
>1wpk_A      28      0
>1wpk_A      29      0
>1wpk_A      30      0
>1wpk_A      31      0
>1wpk_A      32      0
>1wpk_A      33      0
>1wpk_A      34      0
>1wpk_A      35      0
>1wpk_A      36      0
>1wpk_A      37      0
>1wpk_A      38      0
>1wpk_A      39      0
>1wpk_A      40      0
>1wpk_A      41      0
>1wpk_A      42      0
>1wpk_A      43      0
>1wpk_A      44      0
>1wpk_A      45      0
>1wpk_A      46      0
>1wpk_A      47      0
>1wpk_A      48      0
>1wpk_A      49      0
>1wpk_A      50      0
>1wpk_A      51      0
>1wpk_A      52      0
>1wpk_A      53      0
>1wpk_A      54      0
>1wpk_A      55      0
>1wpk_A      56      0
>1wpk_A      57      0
>1wpk_A      58      0
>1wpk_A      59      0
>1wpk_A      60      0
>1wpk_A      61      0
>1wpk_A      62      0
>1wpk_A      63      0
>1wpk_A      64      0
>1wpk_A      65      0
>1wpk_A      66      0
>1wpk_A      67      0
>1wpk_A      68      0
>1wpk_A      69      0
>1wpk_A      70      0
>1wpk_A      71      0
>1wpk_A      72      0
>1wpk_A      73      0
>1wpk_A      74      0
>1wpk_A      75      0
>1wpk_A      76      0
>1wpk_A      77      0
>1wpk_A      78      0
>1wpk_A      79      0
>1wpk_A      80      0
>1wpk_A      81      0
>1wpk_A      82      0
>1wpk_A      83      0
>1wpk_A      84      0
>1wpk_A      85      0
>1wpk_A      86      0
>1wpk_A      87      0
>1wpk_A      88      0
>1wpk_A      89      0
>1wpk_A      90      0
>1wpk_A      91      0
>1wpk_A      92      0
>1wpk_A      93      0
>1wpk_A      94      0
>1wpk_A      95      0
>1wpk_A      96      0
>1wpk_A      97      0
>1wpk_A      98      0
>1wpk_A      99      0
>1wpk_A      100      0
>1wpk_A      101      0
>1wpk_A      102      0
>1wpk_A      103      0
>1wpk_A      104      0
>1wpk_A      105      0
>1wpk_A      106      0
>1wpk_A      107      0
>1wpk_A      108      0
>1wpk_A      109      0
>1wpk_A      110      0
>1wpk_A      111      0
>1wpk_A      112      0
>1wpk_A      113      0
>1wpk_A      114      0
>1wpk_A      115      0
>1wpk_A      116      0
>1wpk_A      117      0
>1wpk_A      118      0
>1wpk_A      119      0
>1wpk_A      120      0
>1wpk_A      121      0
>1wpk_A      122      0
>1wpk_A      123      0
>1wpk_A      124      0
>1wpk_A      125      0
>1wpk_A      126      0
>1wpk_A      127      0
>1wpk_A      128      0
>1wpk_A      129      0
>1wpk_A      130      0
>1wpk_A      131      0
>1wpk_A      132      0
>1wpk_A      133      0
>1wpk_A      134      0
>1wpk_A      135      0
>1wpk_A      136      0
>1wpk_A      137      0
>1wpk_A      138      0
>1wpk_A      139      0
>1wpk_A      140      0
>1wpk_A      141      0
>1wpk_A      142      0
>1wpk_A      143      0
>1wpk_A      144      0
>1wpk_A      145      0
>1wpk_A      146      0
>3bwh_A      1      0
>3bwh_A      2      0
>3bwh_A      3      0
>3bwh_A      4      0
>3bwh_A      5      0
>3bwh_A      6      0
>3bwh_A      7      0
>3bwh_A      8      0
>3bwh_A      9      0
>3bwh_A      10      0
>3bwh_A      11      0
>3bwh_A      12      0
>3bwh_A      13      0
>3bwh_A      14      0
>3bwh_A      15      0
>3bwh_A      16      0
>3bwh_A      17      0
>3bwh_A      18      0
>3bwh_A      19      0
>3bwh_A      20      0
>3bwh_A      21      0
>3bwh_A      22      0
>3bwh_A      23      0
>3bwh_A      24      0
>3bwh_A      25      0
>3bwh_A      26      0
>3bwh_A      27      0
>3bwh_A      28      0
>3bwh_A      29      0
>3bwh_A      30      0
>3bwh_A      31      0
>3bwh_A      32      0
>3bwh_A      33      0
>3bwh_A      34      0
>3bwh_A      35      0
>3bwh_A      36      0
>3bwh_A      37      0
>3bwh_A      38      0
>3bwh_A      39      0
>3bwh_A      40      0
>3bwh_A      41      0
>3bwh_A      42      0
>3bwh_A      43      0
>3bwh_A      44      0
>3bwh_A      45      0
>3bwh_A      46      0
>3bwh_A      47      0
>3bwh_A      48      0
>3bwh_A      49      0
>3bwh_A      50      0
>3bwh_A      51      0
>3bwh_A      52      0
>3bwh_A      53      0
>3bwh_A      54      0
>3bwh_A      55      0
>3bwh_A      56      0
>3bwh_A      57      0
>3bwh_A      58      0
>3bwh_A      59      0
>3bwh_A      60      0
>3bwh_A      61      0
>3bwh_A      62      0
>3bwh_A      63      0
>3bwh_A      64      0
>3bwh_A      65      0
>3bwh_A      66      0
>3bwh_A      67      0
>3bwh_A      68      0
>3bwh_A      69      0
>3bwh_A      70      0
>3bwh_A      71      0
>3bwh_A      72      0
>3bwh_A      73      0
>3bwh_A      74      0
>3bwh_A      75      0
>3bwh_A      76      0
>3bwh_A      77      0
>3bwh_A      78      0
>3bwh_A      79      0
>3bwh_A      80      0
>3bwh_A      81      0
>3bwh_A      82      0
>3bwh_A      83      0
>3bwh_A      84      0
>3bwh_A      85      0
>3bwh_A      86      0
>3bwh_A      87      0
>3bwh_A      88      0
>3bwh_A      89      0
>3bwh_A      90      0
>3bwh_A      91      0
>3bwh_A      92      0
>3bwh_A      93      0
>3bwh_A      94      0
>3bwh_A      95      0
>3bwh_A      96      0
>3bwh_A      97      0
>3bwh_A      98      0
>3bwh_A      99      0
>3bwh_A      100      0
>3bwh_A      101      0
>3bwh_A      102      0
>3bwh_A      103      0
>3bwh_A      104      0
>3bwh_A      105      0
>3bwh_A      106      0
>3bwh_A      107      0
>3bwh_A      108      0
>3bwh_A      109      0
>3bwh_A      110      0
>3bwh_A      111      0
>3bwh_A      112      0
>3bwh_A      113      0
>3bwh_A      114      0
>3bwh_A      115      0
>3bwh_A      116      0
>3bwh_A      117      0
>3bwh_A      118      0
>3bwh_A      119      0
>3bwh_A      120      0
>3bwh_A      121      0
>3bwh_A      122      0
>3bwh_A      123      0
>3bwh_A      124      0
>3bwh_A      125      0
>3bwh_A      126      0
>3bwh_A      127      0
>3bwh_A      128      0
>3bwh_A      129      0
>3bwh_A      130      0
>3bwh_A      131      0
>3bwh_A      132      0
>3bwh_A      133      0
>3bwh_A      134      0
>3bwh_A      135      0
>3bwh_A      136      0
>3bwh_A      137      0
>3bwh_A      138      0
>3bwh_A      139      0
>3bwh_A      140      0
>3bwh_A      141      0
>3bwh_A      142      0
>3bwh_A      143      0
>3bwh_A      144      0
>3bwh_A      145      0
>3bwh_A      146      0
>3bwh_A      147      0
>3bwh_A      148      0
>3bwh_A      149      0
>3bwh_A      150      0
>3bwh_A      151      0
>3bwh_A      152      0
>3bwh_A      153      0
>3bwh_A      154      0
>3bwh_A      155      0
>3bwh_A      156      0
>3bwh_A      157      0
>3bwh_A      158      0
>3bwh_A      159      0
>3bwh_A      160      0
>3bwh_A      161      0
>3bwh_A      162      0
>3bwh_A      163      0
>3bwh_A      164      0
>3bwh_A      165      0
>3bwh_A      166      0
>3bwh_A      167      0
>3bwh_A      168      0
>3bwh_A      169      0
>3bwh_A      170      0
>3bwh_A      171      0
>3bwh_A      172      0
>3bwh_A      173      0
>3bwh_A      174      0
>3bwh_A      175      0
>3bwh_A      176      0
>3bwh_A      177      0
>3bwh_A      178      0
>3bwh_A      179      0
>3bwh_A      180      0
>3bwh_A      181      0
>3bwh_A      182      0
>3bwh_A      183      0
>3bwh_A      184      0
>3bwh_A      185      0
>3bwh_A      186      0
>3bwh_A      187      0
>3bwh_A      188      0
>3bwh_A      189      0
>3bwh_A      190      0
>3bwh_A      191      0
>3bwh_A      192      0
>3bwh_A      193      0
>3bwh_A      194      0
>3bwh_A      195      0
>3bwh_A      196      0
>3bwh_A      197      0
>3bwh_A      198      0
>3bwh_A      199      0
>3bwh_A      200      0
>3bwh_A      201      0
>3bwh_A      202      0
>3bwh_A      203      0
>3bwh_A      204      0
>3bwh_A      205      0
>3bwh_A      206      0
>3bwh_A      207      0
>3bwh_A      208      0
>3bwh_A      209      0
>3bwh_A      210      0
>3bwh_A      211      0
>3bwh_A      212      0
>3bwh_A      213      0
>3bwh_A      214      0
>3bwh_A      215      0
>3bwh_A      216      0
>3bwh_A      217      0
>3bwh_A      218      0
>3bwh_A      219      0
>3bwh_A      220      0
>3bwh_A      221      0
>3bwh_A      222      0
>3bwh_A      223      0
>3bwh_A      224      0
>3bwh_A      225      0
>3bwh_A      226      0
>3bwh_A      227      0
>3bwh_A      228      0
>3bwh_A      229      0
>3bwh_A      230      0
>3bwh_A      231      0
>3bwh_A      232      0
>3bwh_A      233      0
>3bwh_A      234      0
>3bwh_A      235      0
>3bwh_A      236      0
>3bwh_A      237      0
>3bwh_A      238      0
>3bwh_A      239      0
>3bwh_A      240      0
>3bwh_A      241      0
>3bwh_A      242      0
>3bwh_A      243      0
>3bwh_A      244      0
>3bwh_A      245      0
>DP00240      1      0
>DP00240      2      0
>DP00240      3      0
>DP00240      4      0
>DP00240      5      0
>DP00240      6      0
>DP00240      7      0
>DP00240      8      0
>DP00240      9      0
>DP00240      10      0
>DP00240      11      0
>DP00240      12      0
>DP00240      13      0
>DP00240      14      0
>DP00240      15      0
>DP00240      16      0
>DP00240      17      0
>DP00240      18      0
>DP00240      19      0
>DP00240      20      0
>DP00240      21      0
>DP00240      22      0
>DP00240      23      0
>DP00240      24      0
>DP00240      25      0
>DP00240      26      0
>DP00240      27      0
>DP00240      28      0
>DP00240      29      0
>DP00240      30      0
>DP00240      31      0
>DP00240      32      0
>DP00240      33      0
>DP00240      34      0
>DP00240      35      0
>DP00240      36      0
>DP00240      37      0
>DP00240      38      0
>DP00240      39      0
>DP00240      40      0
>DP00240      41      0
>DP00240      42      0
>DP00240      43      0
>DP00240      44      0
>DP00240      45      0
>DP00240      46      0
>DP00240      47      0
>DP00240      48      0
>DP00240      49      0
>DP00240      50      0
>DP00240      51      0
>DP00240      52      0
>DP00240      53      0
>DP00240      54      0
>DP00240      55      0
>DP00240      56      0
>DP00240      57      0
>DP00240      58      0
>DP00240      59      0
>DP00240      60      0
>DP00240      61      0
>DP00240      62      0
>DP00240      63      0
>DP00240      64      0
>DP00240      65      0
>DP00240      66      0
>DP00240      67      0
>DP00240      68      0
>DP00240      69      0
>DP00240      70      0
>DP00240      71      0
>DP00240      72      0
>DP00240      73      0
>DP00240      74      0
>DP00240      75      0
>DP00240      76      0
>DP00240      77      0
>DP00240      78      0
>DP00240      79      0
>DP00240      80      0
>DP00240      81      0
>DP00240      82      0
>DP00240      83      0
>DP00240      84      0
>DP00240      85      0
>DP00240      86      0
>DP00240      87      0
>DP00240      88      0
>DP00240      89      0
>DP00240      90      0
>DP00240      91      0
>DP00240      92      0
>DP00240      93      0
>DP00240      94      0
>DP00240      95      0
>DP00240      96      0
>DP00240      97      0
>DP00240      98      0
>DP00240      99      0
>DP00240      100      0
>DP00240      101      0
>DP00240      102      0
>DP00240      103      0
>DP00240      104      0
>DP00240      105      0
>DP00240      106      0
>DP00240      107      0
>DP00240      108      0
>DP00240      109      0
>DP00240      110      0
>DP00240      111      0
>DP00240      112      0
>DP00240      113      0
>DP00240      114      0
>DP00240      115      0
>DP00240      116      0
>DP00240      117      0
>DP00240      118      0
>DP00240      119      0
>DP00240      120      0
>DP00240      121      0
>DP00240      122      0
>DP00240      123      0
>DP00240      124      0
>DP00240      125      0
>DP00240      126      0
>DP00240      127      0
>DP00240      128      0
>DP00240      129      0
>DP00240      130      0
>DP00240      131      0
>DP00240      132      0
>DP00240      133      0
>DP00240      134      0
>DP00240      135      0
>DP00240      136      0
>DP00240      137      0
>DP00240      138      0
>DP00240      139      0
>DP00240      140      0
>DP00240      141      0
>DP00240      142      0
>DP00240      143      0
>DP00240      144      0
>DP00240      145      0
>DP00240      146      0
>DP00240      147      0
>DP00240      148      0
>DP00240      149      0
>DP00240      150      0
>DP00240      151      0
>DP00240      152      0
>DP00240      153      0
>DP00240      154      0
>DP00240      155      0
>DP00240      156      0
>DP00240      157      0
>DP00240      158      0
>DP00240      159      0
>DP00240      160      0
>DP00240      161      0
>DP00240      162      0
>DP00240      163      0
>DP00240      164      0
>DP00240      165      0
>DP00240      166      0
>DP00240      167      0
>DP00240      168      0
>DP00240      169      0
>DP00240      170      0
>DP00240      171      0
>DP00240      172      0
>DP00240      173      0
>DP00240      174      0
>DP00240      175      0
>DP00240      176      0
>DP00240      177      0
>DP00240      178      0
>DP00240      179      0
>DP00240      180      0
>DP00240      181      0
>DP00240      182      0
>DP00240      183      0
>DP00240      184      0
>DP00240      185      0
>DP00240      186      0
>DP00240      187      0
>DP00240      188      0
>DP00240      189      0
>DP00240      190      0
>DP00240      191      0
>DP00240      192      0
>DP00240      193      0
>DP00240      194      0
>DP00240      195      0
>DP00240      196      0
>DP00240      197      0
>DP00240      198      0
>DP00240      199      0
>DP00240      200      0
>DP00240      201      0
>DP00240      202      0
>DP00240      203      0
>DP00240      204      0
>DP00240      205      0
>DP00240      206      0
>DP00240      207      0
>DP00240      208      0
>DP00240      209      0
>DP00240      210      0
>DP00240      211      0
>DP00240      212      0
>DP00240      213      0
>DP00240      214      0
>DP00240      215      0
>DP00240      216      0
>DP00240      217      0
>DP00240      218      0
>DP00240      219      0
>DP00240      220      0
>DP00240      221      0
>DP00240      222      0
>DP00240      223      0
>DP00240      224      0
>DP00240      225      0
>DP00240      226      0
>DP00240      227      0
>DP00240      228      0
>DP00240      229      0
>DP00240      230      0
>DP00240      231      0
>DP00240      232      0
>DP00240      233      0
>DP00240      234      0
>DP00240      235      0
>DP00240      236      0
>DP00240      237      0
>DP00240      238      0
>DP00240      239      0
>DP00240      240      0
>DP00240      241      0
>DP00240      242      0
>DP00240      243      0
>DP00240      244      0
>DP00240      245      0
>DP00240      246      0
>DP00240      247      0
>DP00240      248      0
>DP00240      249      0
>DP00240      250      0
>DP00240      251      0
>DP00240      252      0
>DP00240      253      0
>DP00240      254      0
>DP00240      255      0
>DP00240      256      0
>DP00240      257      0
>DP00240      258      0
>DP00240      259      0
>DP00240      260      0
>DP00240      261      0
>DP00240      262      0
>DP00240      263      0
>DP00240      264      0
>DP00240      265      0
>DP00240      266      0
>DP00240      267      0
>DP00240      268      0
>DP00240      269      0
>DP00240      270      0
>DP00240      271      0
>DP00240      272      0
>DP00240      273      0
>DP00240      274      0
>DP00240      275      0
>DP00240      276      0
>DP00240      277      0
>DP00240      278      0
>DP00240      279      0
>DP00240      280      0
>DP00240      281      0
>DP00240      282      0
>DP00240      283      0
>DP00240      284      0
>DP00240      285      0
>DP00240      286      0
>DP00240      287      0
>DP00240      288      0
>DP00240      289      0
>DP00240      290      0
>DP00240      291      0
>DP00240      292      0
>DP00240      293      0
>DP00240      294      0
>DP00240      295      0
>DP00240      296      0
>DP00240      297      0
>DP00240      298      0
>DP00240      299      0
>DP00240      300      0
>DP00240      301      0
>DP00240      302      0
>DP00240      303      0
>DP00240      304      0
>DP00240      305      0
>DP00240      306      0
>DP00240      307      0
>DP00240      308      0
>DP00240      309      0
>DP00240      310      0
>DP00240      311      0
>DP00240      312      0
>DP00240      313      0
>DP00240      314      0
>DP00240      315      0
>DP00240      316      0
>DP00240      317      0
>DP00240      318      0
>DP00240      319      0
>DP00240      320      0
>DP00240      321      0
>DP00240      322      0
>DP00240      323      0
>DP00240      324      0
>DP00240      325      0
>DP00240      326      0
>DP00240      327      0
>DP00240      328      0
>DP00240      329      0
>DP00240      330      0
>DP00240      331      0
>DP00240      332      0
>DP00240      333      0
>DP00240      334      0
>DP00240      335      0
>DP00240      336      0
>DP00240      337      0
>DP00240      338      0
>DP00240      339      0
>DP00240      340      0
>DP00240      341      0
>DP00240      342      0
>DP00240      343      0
>DP00240      344      0
>DP00240      345      0
>DP00240      346      0
>DP00240      347      0
>DP00240      348      0
>DP00240      349      0
>DP00240      350      0
>DP00240      351      0
>DP00240      352      0
>DP00240      353      0
>DP00240      354      0
>DP00240      355      0
>DP00240      356      0
>DP00240      357      0
>DP00240      358      0
>DP00240      359      0
>DP00240      360      0
>DP00240      361      0
>DP00240      362      0
>DP00240      363      0
>DP00240      364      0
>DP00240      365      0
>DP00240      366      0
>DP00240      367      0
>DP00240      368      0
>DP00240      369      0
>DP00240      370      0
>DP00240      371      0
>DP00240      372      0
>DP00240      373      0
>DP00240      374      0
>DP00240      375      0
>DP00240      376      0
>DP00240      377      0
>DP00240      378      0
>DP00240      379      0
>DP00240      380      0
>DP00240      381      0
>DP00240      382      0
>DP00240      383      0
>DP00240      384      0
>DP00240      385      0
>DP00240      386      0
>DP00240      387      0
>DP00240      388      0
>DP00240      389      0
>DP00240      390      0
>DP00240      391      0
>DP00240      392      0
>DP00240      393      0
>DP00240      394      0
>DP00240      395      0
>DP00240      396      0
>DP00240      397      0
>DP00240      398      0
>DP00240      399      0
>DP00240      400      0
>DP00240      401      0
>DP00240      402      0
>DP00240      403      0
>DP00240      404      0
>DP00240      405      0
>DP00240      406      0
>DP00240      407      0
>DP00240      408      0
>DP00240      409      0
>DP00240      410      0
>DP00240      411      0
>DP00240      412      0
>DP00240      413      0
>DP00240      414      0
>DP00240      415      0
>DP00240      416      0
>DP00240      417      0
>DP00240      418      0
>DP00240      419      0
>DP00240      420      0
>DP00240      421      0
>DP00240      422      0
>DP00240      423      0
>DP00240      424      0
>DP00240      425      0
>DP00240      426      0
>DP00240      427      0
>DP00240      428      0
>DP00240      429      0
>DP00240      430      1
>DP00240      431      1
>DP00240      432      1
>DP00240      433      1
>DP00240      434      1
>DP00240      435      1
>DP00240      436      1
>DP00240      437      1
>DP00240      438      1
>DP00240      439      1
>DP00240      440      1
>DP00240      441      1
>DP00240      442      1
>DP00240      443      1
>DP00240      444      1
>DP00240      445      1
>DP00240      446      1
>DP00240      447      1
>DP00240      448      1
>DP00240      449      1
>DP00240      450      1
>DP00240      451      1
>DP00240      452      1
>DP00240      453      1
>DP00240      454      1
>DP00240      455      1
>DP00240      456      1
>DP00240      457      1
>DP00240      458      1
>DP00240      459      1
>DP00240      460      1
>DP00240      461      1
>DP00240      462      1
>DP00240      463      1
>DP00240      464      1
>DP00240      465      1
>DP00240      466      1
>DP00240      467      1
>DP00240      468      1
>DP00240      469      1
>DP00240      470      1
>DP00240      471      1
>DP00240      472      1
>DP00240      473      1
>DP00240      474      1
>DP00240      475      1
>DP00240      476      1
>DP00240      477      1
>DP00240      478      1
>DP00240      479      1
>DP00240      480      1
>DP00240      481      1
>DP00240      482      1
>DP00240      483      1
>DP00240      484      1
>DP00240      485      1
>DP00240      486      1
>DP00240      487      1
>DP00240      488      1
>DP00240      489      1
>DP00240      490      1
>DP00240      491      1
>DP00240      492      1
>DP00240      493      1
>DP00240      494      1
>DP00240      495      1
>DP00240      496      1
>DP00240      497      1
>DP00240      498      1
>DP00240      499      1
>DP00240      500      1
>DP00240      501      1
>DP00240      502      1
>DP00240      503      1
>DP00240      504      1
>DP00240      505      1
>DP00240      506      1
>DP00240      507      1
>DP00240      508      1
>DP00240      509      1
>DP00240      510      1
>DP00240      511      1
>DP00240      512      1
>DP00240      513      1
>DP00240      514      1
>DP00240      515      1
>DP00240      516      1
>DP00240      517      1
>DP00240      518      1
>DP00240      519      1
>DP00240      520      1
>DP00240      521      1
>DP00240      522      1
>DP00240      523      1
>DP00240      524      1
>DP00240      525      1
>DP00240      526      1
>DP00240      527      1
>DP00240      528      1
>DP00240      529      1
>DP00240      530      1
>DP00240      531      1
>DP00240      532      1
>DP00240      533      1
>DP00240      534      1
>DP00240      535      1
>DP00240      536      1
>DP00240      537      1
>DP00240      538      1
>DP00240      539      1
>DP00240      540      1
>DP00240      541      1
>DP00240      542      1
>DP00240      543      1
>DP00240      544      1
>DP00240      545      1
>DP00240      546      1
>DP00240      547      1
>DP00240      548      1
>DP00240      549      1
>DP00240      550      1
>DP00240      551      1
>DP00240      552      1
>DP00240      553      1
>DP00240      554      1
>DP00240      555      1
>DP00240      556      1
>DP00240      557      1
>DP00240      558      1
>DP00240      559      1
>DP00240      560      1
>DP00240      561      1
>DP00240      562      1
>DP00240      563      1
>DP00240      564      1
>DP00240      565      1
>DP00240      566      1
>DP00240      567      1
>DP00240      568      1
>DP00240      569      1
>DP00240      570      1
>DP00240      571      1
>DP00240      572      1
>DP00240      573      1
>DP00240      574      1
>DP00240      575      1
>DP00240      576      1
>DP00240      577      1
>DP00240      578      1
>DP00240      579      1
>DP00240      580      1
>DP00240      581      1
>DP00240      582      1
>DP00240      583      1
>DP00240      584      1
>DP00240      585      1
>DP00240      586      1
>DP00240      587      1
>DP00240      588      1
>DP00240      589      1
>DP00240      590      1
>DP00240      591      1
>DP00240      592      1
>DP00240      593      1
>DP00240      594      1
>DP00240      595      1
>DP00240      596      1
>DP00240      597      1
>DP00240      598      1
>DP00240      599      1
>DP00240      600      1
>DP00240      601      1
>DP00240      602      1
>DP00240      603      1
>DP00240      604      1
>DP00240      605      1
>DP00240      606      1
>DP00240      607      1
>DP00240      608      1
>DP00240      609      1
>DP00240      610      1
>DP00240      611      1
>DP00240      612      1
>DP00240      613      1
>DP00240      614      1
>DP00240      615      1
>DP00240      616      1
>DP00240      617      1
>DP00240      618      1
>DP00240      619      1
>DP00240      620      1
>DP00240      621      1
>DP00240      622      1
>DP00240      623      1
>DP00240      624      1
>DP00240      625      1
>DP00240      626      1
>DP00240      627      1
>DP00240      628      1
>DP00240      629      1
>DP00240      630      1
>DP00240      631      1
>DP00240      632      1
>DP00240      633      1
>DP00240      634      1
>DP00240      635      1
>DP00240      636      1
>DP00240      637      1
>DP00240      638      1
>DP00240      639      1
>DP00240      640      1
>DP00240      641      1
>DP00240      642      1
>DP00240      643      1
>DP00240      644      1
>DP00240      645      1
>DP00240      646      1
>DP00240      647      1
>DP00240      648      1
>DP00240      649      1
>DP00240      650      1
>DP00240      651      1
>DP00240      652      1
>DP00240      653      1
>DP00240      654      1
>DP00240      655      1
>DP00240      656      1
>DP00240      657      1
>DP00240      658      1
>DP00240      659      1
>DP00240      660      1
>DP00240      661      1
>DP00240      662      1
>DP00240      663      1
>DP00240      664      1
>DP00240      665      1
>DP00240      666      1
>DP00240      667      1
>DP00240      668      1
>DP00240      669      1
>DP00240      670      1
>DP00240      671      1
>DP00240      672      1
>DP00240      673      1
>DP00240      674      1
>DP00240      675      1
>DP00240      676      1
>DP00240      677      1
>DP00240      678      1
>DP00240      679      1
>DP00240      680      1
>DP00240      681      1
>DP00240      682      1
>DP00240      683      1
>DP00240      684      1
>DP00240      685      1
>DP00240      686      1
>DP00240      687      1
>DP00240      688      1
>DP00240      689      1
>DP00240      690      1
>DP00240      691      1
>DP00240      692      1
>DP00240      693      1
>DP00240      694      1
>DP00240      695      1
>DP00240      696      1
>DP00240      697      1
>DP00240      698      1
>DP00240      699      1
>DP00240      700      1
>DP00240      701      1
>DP00240      702      1
>DP00240      703      1
>DP00240      704      1
>DP00240      705      1
>DP00240      706      1
>DP00240      707      1
>DP00240      708      1
>DP00240      709      1
>DP00240      710      1
>DP00240      711      1
>DP00240      712      1
>DP00240      713      1
>DP00240      714      1
>DP00240      715      1
>DP00240      716      1
>DP00240      717      1
>DP00240      718      1
>DP00240      719      1
>DP00240      720      1
>DP00240      721      1
>DP00240      722      1
>DP00240      723      1
>DP00240      724      1
>DP00240      725      1
>DP00240      726      1
>DP00240      727      1
>DP00240      728      1
>DP00240      729      1
>DP00240      730      1
>DP00240      731      1
>DP00240      732      1
>DP00240      733      1
>DP00240      734      1
>DP00240      735      1
>DP00240      736      1
>DP00240      737      1
>1kqf_C      1      0
>1kqf_C      2      0
>1kqf_C      3      0
>1kqf_C      4      0
>1kqf_C      5      0
>1kqf_C      6      0
>1kqf_C      7      0
>1kqf_C      8      0
>1kqf_C      9      0
>1kqf_C      10      0
>1kqf_C      11      0
>1kqf_C      12      0
>1kqf_C      13      0
>1kqf_C      14      0
>1kqf_C      15      0
>1kqf_C      16      0
>1kqf_C      17      0
>1kqf_C      18      0
>1kqf_C      19      0
>1kqf_C      20      0
>1kqf_C      21      0
>1kqf_C      22      0
>1kqf_C      23      0
>1kqf_C      24      0
>1kqf_C      25      0
>1kqf_C      26      0
>1kqf_C      27      0
>1kqf_C      28      0
>1kqf_C      29      0
>1kqf_C      30      0
>1kqf_C      31      0
>1kqf_C      32      0
>1kqf_C      33      0
>1kqf_C      34      0
>1kqf_C      35      0
>1kqf_C      36      0
>1kqf_C      37      0
>1kqf_C      38      0
>1kqf_C      39      0
>1kqf_C      40      0
>1kqf_C      41      0
>1kqf_C      42      0
>1kqf_C      43      0
>1kqf_C      44      0
>1kqf_C      45      0
>1kqf_C      46      0
>1kqf_C      47      0
>1kqf_C      48      0
>1kqf_C      49      0
>1kqf_C      50      0
>1kqf_C      51      0
>1kqf_C      52      0
>1kqf_C      53      0
>1kqf_C      54      0
>1kqf_C      55      0
>1kqf_C      56      0
>1kqf_C      57      0
>1kqf_C      58      0
>1kqf_C      59      0
>1kqf_C      60      0
>1kqf_C      61      0
>1kqf_C      62      0
>1kqf_C      63      0
>1kqf_C      64      0
>1kqf_C      65      0
>1kqf_C      66      0
>1kqf_C      67      0
>1kqf_C      68      0
>1kqf_C      69      0
>1kqf_C      70      0
>1kqf_C      71      0
>1kqf_C      72      0
>1kqf_C      73      0
>1kqf_C      74      0
>1kqf_C      75      0
>1kqf_C      76      0
>1kqf_C      77      0
>1kqf_C      78      0
>1kqf_C      79      0
>1kqf_C      80      0
>1kqf_C      81      0
>1kqf_C      82      0
>1kqf_C      83      0
>1kqf_C      84      0
>1kqf_C      85      0
>1kqf_C      86      0
>1kqf_C      87      0
>1kqf_C      88      0
>1kqf_C      89      0
>1kqf_C      90      0
>1kqf_C      91      0
>1kqf_C      92      0
>1kqf_C      93      0
>1kqf_C      94      0
>1kqf_C      95      0
>1kqf_C      96      0
>1kqf_C      97      0
>1kqf_C      98      0
>1kqf_C      99      0
>1kqf_C      100      0
>1kqf_C      101      0
>1kqf_C      102      0
>1kqf_C      103      0
>1kqf_C      104      0
>1kqf_C      105      0
>1kqf_C      106      0
>1kqf_C      107      0
>1kqf_C      108      0
>1kqf_C      109      0
>1kqf_C      110      0
>1kqf_C      111      0
>1kqf_C      112      0
>1kqf_C      113      0
>1kqf_C      114      0
>1kqf_C      115      0
>1kqf_C      116      0
>1kqf_C      117      0
>1kqf_C      118      0
>1kqf_C      119      0
>1kqf_C      120      0
>1kqf_C      121      0
>1kqf_C      122      0
>1kqf_C      123      0
>1kqf_C      124      0
>1kqf_C      125      0
>1kqf_C      126      0
>1kqf_C      127      0
>1kqf_C      128      0
>1kqf_C      129      0
>1kqf_C      130      0
>1kqf_C      131      0
>1kqf_C      132      0
>1kqf_C      133      0
>1kqf_C      134      0
>1kqf_C      135      0
>1kqf_C      136      0
>1kqf_C      137      0
>1kqf_C      138      0
>1kqf_C      139      0
>1kqf_C      140      0
>1kqf_C      141      0
>1kqf_C      142      0
>1kqf_C      143      0
>1kqf_C      144      0
>1kqf_C      145      0
>1kqf_C      146      0
>1kqf_C      147      0
>1kqf_C      148      0
>1kqf_C      149      0
>1kqf_C      150      0
>1kqf_C      151      0
>1kqf_C      152      0
>1kqf_C      153      0
>1kqf_C      154      0
>1kqf_C      155      0
>1kqf_C      156      0
>1kqf_C      157      0
>1kqf_C      158      0
>1kqf_C      159      0
>1kqf_C      160      0
>1kqf_C      161      0
>1kqf_C      162      0
>1kqf_C      163      0
>1kqf_C      164      0
>1kqf_C      165      0
>1kqf_C      166      0
>1kqf_C      167      0
>1kqf_C      168      0
>1kqf_C      169      0
>1kqf_C      170      0
>1kqf_C      171      0
>1kqf_C      172      0
>1kqf_C      173      0
>1kqf_C      174      0
>1kqf_C      175      0
>1kqf_C      176      0
>1kqf_C      177      0
>1kqf_C      178      0
>1kqf_C      179      0
>1kqf_C      180      0
>1kqf_C      181      0
>1kqf_C      182      0
>1kqf_C      183      0
>1kqf_C      184      0
>1kqf_C      185      0
>1kqf_C      186      0
>1kqf_C      187      0
>1kqf_C      188      0
>1kqf_C      189      0
>1kqf_C      190      0
>1kqf_C      191      0
>1kqf_C      192      0
>1kqf_C      193      0
>1kqf_C      194      0
>1kqf_C      195      0
>1kqf_C      196      0
>1kqf_C      197      0
>1kqf_C      198      0
>1kqf_C      199      0
>1kqf_C      200      0
>1kqf_C      201      0
>1kqf_C      202      0
>1kqf_C      203      0
>1kqf_C      204      0
>1kqf_C      205      0
>1kqf_C      206      0
>1kqf_C      207      0
>1kqf_C      208      0
>1kqf_C      209      0
>1kqf_C      210      0
>1kqf_C      211      0
>1kqf_C      212      0
>1kqf_C      213      0
>1kqf_C      214      0
>1kqf_C      215      0
>1kqf_C      216      0
>1kqf_C      217      0
>2fb6_A      1      0
>2fb6_A      2      0
>2fb6_A      3      0
>2fb6_A      4      0
>2fb6_A      5      0
>2fb6_A      6      0
>2fb6_A      7      0
>2fb6_A      8      0
>2fb6_A      9      0
>2fb6_A      10      0
>2fb6_A      11      0
>2fb6_A      12      0
>2fb6_A      13      0
>2fb6_A      14      0
>2fb6_A      15      0
>2fb6_A      16      0
>2fb6_A      17      0
>2fb6_A      18      0
>2fb6_A      19      0
>2fb6_A      20      0
>2fb6_A      21      0
>2fb6_A      22      0
>2fb6_A      23      0
>2fb6_A      24      0
>2fb6_A      25      0
>2fb6_A      26      0
>2fb6_A      27      0
>2fb6_A      28      0
>2fb6_A      29      0
>2fb6_A      30      0
>2fb6_A      31      0
>2fb6_A      32      0
>2fb6_A      33      0
>2fb6_A      34      0
>2fb6_A      35      0
>2fb6_A      36      0
>2fb6_A      37      0
>2fb6_A      38      0
>2fb6_A      39      0
>2fb6_A      40      0
>2fb6_A      41      0
>2fb6_A      42      0
>2fb6_A      43      0
>2fb6_A      44      0
>2fb6_A      45      0
>2fb6_A      46      0
>2fb6_A      47      0
>2fb6_A      48      0
>2fb6_A      49      0
>2fb6_A      50      0
>2fb6_A      51      0
>2fb6_A      52      0
>2fb6_A      53      0
>2fb6_A      54      0
>2fb6_A      55      0
>2fb6_A      56      0
>2fb6_A      57      0
>2fb6_A      58      0
>2fb6_A      59      0
>2fb6_A      60      0
>2fb6_A      61      0
>2fb6_A      62      0
>2fb6_A      63      0
>2fb6_A      64      0
>2fb6_A      65      0
>2fb6_A      66      0
>2fb6_A      67      0
>2fb6_A      68      0
>2fb6_A      69      0
>2fb6_A      70      0
>2fb6_A      71      0
>2fb6_A      72      0
>2fb6_A      73      0
>2fb6_A      74      0
>2fb6_A      75      0
>2fb6_A      76      0
>2fb6_A      77      0
>2fb6_A      78      0
>2fb6_A      79      0
>2fb6_A      80      0
>2fb6_A      81      0
>2fb6_A      82      0
>2fb6_A      83      0
>2fb6_A      84      0
>2fb6_A      85      0
>2fb6_A      86      0
>2fb6_A      87      0
>2fb6_A      88      0
>2fb6_A      89      0
>2fb6_A      90      0
>2fb6_A      91      0
>2fb6_A      92      0
>2fb6_A      93      0
>2fb6_A      94      0
>2fb6_A      95      0
>2fb6_A      96      0
>2fb6_A      97      0
>2fb6_A      98      0
>2fb6_A      99      0
>2fb6_A      100      0
>2fb6_A      101      0
>2fb6_A      102      0
>2fb6_A      103      0
>2fb6_A      104      0
>2fb6_A      105      0
>2fb6_A      106      0
>2fb6_A      107      0
>2fb6_A      108      0
>2fb6_A      109      0
>2fb6_A      110      0
>2fb6_A      111      0
>2fb6_A      112      0
>2fb6_A      113      0
>2fb6_A      114      0
>2fb6_A      115      0
>2fb6_A      116      0
>2fb6_A      117      0
>DP00245      1      0
>DP00245      2      0
>DP00245      3      0
>DP00245      4      0
>DP00245      5      0
>DP00245      6      0
>DP00245      7      0
>DP00245      8      0
>DP00245      9      0
>DP00245      10      0
>DP00245      11      0
>DP00245      12      0
>DP00245      13      0
>DP00245      14      0
>DP00245      15      0
>DP00245      16      0
>DP00245      17      0
>DP00245      18      0
>DP00245      19      0
>DP00245      20      0
>DP00245      21      0
>DP00245      22      0
>DP00245      23      0
>DP00245      24      0
>DP00245      25      0
>DP00245      26      0
>DP00245      27      0
>DP00245      28      0
>DP00245      29      0
>DP00245      30      0
>DP00245      31      0
>DP00245      32      0
>DP00245      33      0
>DP00245      34      0
>DP00245      35      0
>DP00245      36      0
>DP00245      37      0
>DP00245      38      0
>DP00245      39      0
>DP00245      40      0
>DP00245      41      0
>DP00245      42      0
>DP00245      43      0
>DP00245      44      0
>DP00245      45      0
>DP00245      46      0
>DP00245      47      0
>DP00245      48      0
>DP00245      49      0
>DP00245      50      0
>DP00245      51      0
>DP00245      52      0
>DP00245      53      0
>DP00245      54      0
>DP00245      55      0
>DP00245      56      0
>DP00245      57      0
>DP00245      58      0
>DP00245      59      0
>DP00245      60      0
>DP00245      61      0
>DP00245      62      0
>DP00245      63      0
>DP00245      64      0
>DP00245      65      0
>DP00245      66      0
>DP00245      67      0
>DP00245      68      0
>DP00245      69      0
>DP00245      70      0
>DP00245      71      0
>DP00245      72      0
>DP00245      73      0
>DP00245      74      0
>DP00245      75      0
>DP00245      76      0
>DP00245      77      0
>DP00245      78      0
>DP00245      79      0
>DP00245      80      0
>DP00245      81      0
>DP00245      82      0
>DP00245      83      0
>DP00245      84      0
>DP00245      85      0
>DP00245      86      0
>DP00245      87      0
>DP00245      88      0
>DP00245      89      0
>DP00245      90      0
>DP00245      91      1
>DP00245      92      1
>DP00245      93      1
>DP00245      94      1
>DP00245      95      1
>DP00245      96      1
>DP00245      97      1
>DP00245      98      1
>DP00245      99      1
>DP00245      100      1
>DP00245      101      1
>DP00245      102      1
>DP00245      103      1
>DP00245      104      1
>DP00245      105      1
>DP00245      106      1
>DP00245      107      1
>DP00245      108      1
>DP00245      109      1
>DP00245      110      1
>DP00245      111      1
>DP00245      112      1
>DP00245      113      0
>DP00245      114      0
>DP00245      115      0
>DP00245      116      0
>DP00245      117      0
>DP00245      118      0
>DP00245      119      0
>DP00245      120      0
>DP00245      121      0
>DP00245      122      0
>DP00245      123      0
>DP00245      124      0
>DP00245      125      0
>DP00245      126      0
>DP00245      127      0
>DP00245      128      0
>DP00245      129      0
>DP00245      130      0
>DP00245      131      0
>DP00245      132      0
>DP00245      133      0
>DP00245      134      0
>DP00245      135      0
>DP00245      136      0
>DP00245      137      0
>DP00245      138      0
>DP00245      139      0
>DP00245      140      0
>DP00245      141      0
>DP00245      142      0
>DP00245      143      0
>DP00245      144      0
>DP00245      145      0
>DP00245      146      0
>DP00245      147      0
>DP00245      148      0
>DP00245      149      0
>DP00245      150      0
>DP00245      151      0
>DP00245      152      0
>DP00245      153      0
>DP00245      154      0
>DP00245      155      0
>DP00245      156      0
>DP00245      157      0
>DP00245      158      0
>DP00245      159      0
>DP00245      160      0
>DP00245      161      0
>DP00245      162      0
>DP00245      163      0
>DP00245      164      0
>DP00245      165      0
>DP00245      166      0
>DP00245      167      0
>DP00245      168      0
>DP00245      169      0
>DP00245      170      0
>DP00245      171      0
>DP00245      172      0
>DP00245      173      0
>DP00245      174      0
>DP00245      175      0
>DP00245      176      0
>DP00245      177      0
>DP00245      178      0
>DP00245      179      0
>DP00245      180      0
>DP00245      181      0
>DP00245      182      0
>DP00245      183      0
>DP00245      184      0
>DP00245      185      0
>DP00245      186      0
>DP00245      187      0
>DP00245      188      0
>DP00245      189      0
>DP00245      190      0
>DP00245      191      0
>DP00245      192      0
>DP00245      193      0
>DP00245      194      0
>DP00245      195      0
>DP00245      196      0
>DP00245      197      0
>DP00245      198      0
>DP00245      199      0
>DP00245      200      0
>DP00245      201      0
>DP00245      202      0
>DP00245      203      0
>DP00245      204      0
>DP00245      205      0
>DP00245      206      0
>DP00245      207      0
>DP00245      208      0
>DP00245      209      0
>DP00245      210      0
>DP00245      211      0
>DP00245      212      0
>DP00245      213      0
>DP00245      214      0
>DP00245      215      0
>DP00245      216      0
>DP00245      217      0
>DP00245      218      0
>DP00245      219      0
>DP00245      220      0
>DP00245      221      0
>DP00245      222      0
>DP00245      223      0
>DP00245      224      0
>DP00245      225      0
>DP00245      226      0
>DP00245      227      0
>DP00245      228      0
>DP00245      229      0
>DP00245      230      0
>DP00245      231      0
>DP00245      232      0
>DP00245      233      0
>DP00245      234      0
>DP00245      235      0
>DP00245      236      0
>DP00245      237      0
>DP00245      238      0
>DP00245      239      0
>DP00245      240      0
>DP00245      241      0
>DP00245      242      0
>DP00245      243      0
>DP00245      244      0
>DP00245      245      0
>DP00245      246      0
>DP00245      247      0
>DP00245      248      0
>DP00245      249      0
>DP00245      250      0
>DP00245      251      0
>DP00245      252      0
>DP00245      253      0
>DP00245      254      0
>DP00245      255      0
>DP00245      256      0
>DP00245      257      0
>DP00245      258      0
>DP00245      259      0
>DP00245      260      0
>DP00245      261      0
>DP00245      262      0
>DP00245      263      0
>DP00245      264      0
>DP00245      265      0
>DP00245      266      0
>DP00245      267      0
>DP00245      268      0
>DP00245      269      0
>DP00245      270      0
>DP00245      271      0
>DP00245      272      0
>DP00245      273      0
>DP00245      274      0
>DP00245      275      0
>DP00245      276      0
>DP00245      277      0
>DP00245      278      0
>DP00245      279      0
>DP00245      280      0
>DP00245      281      0
>DP00245      282      0
>DP00245      283      0
>DP00245      284      0
>DP00245      285      0
>DP00245      286      0
>DP00245      287      0
>DP00245      288      0
>DP00245      289      0
>DP00245      290      0
>DP00245      291      0
>DP00245      292      0
>DP00245      293      0
>DP00245      294      0
>DP00245      295      0
>DP00245      296      0
>DP00245      297      0
>DP00245      298      0
>DP00245      299      0
>DP00245      300      0
>DP00245      301      0
>DP00245      302      0
>DP00245      303      0
>DP00245      304      0
>DP00245      305      0
>DP00245      306      0
>DP00245      307      0
>DP00245      308      0
>DP00245      309      0
>DP00245      310      0
>DP00245      311      0
>DP00245      312      0
>DP00245      313      0
>DP00245      314      0
>DP00245      315      0
>DP00245      316      0
>DP00245      317      0
>DP00245      318      0
>DP00245      319      0
>DP00245      320      0
>DP00245      321      0
>DP00245      322      0
>DP00245      323      0
>DP00245      324      0
>DP00245      325      0
>DP00245      326      0
>DP00245      327      0
>DP00245      328      0
>DP00245      329      0
>DP00245      330      0
>DP00245      331      0
>DP00245      332      0
>DP00245      333      0
>DP00245      334      0
>DP00245      335      0
>DP00245      336      0
>DP00245      337      0
>DP00245      338      0
>DP00245      339      0
>DP00245      340      0
>DP00245      341      0
>DP00245      342      0
>DP00245      343      0
>DP00245      344      0
>DP00245      345      0
>DP00245      346      0
>DP00245      347      0
>DP00245      348      0
>DP00245      349      0
>DP00245      350      0
>DP00245      351      0
>DP00245      352      0
>DP00245      353      0
>DP00245      354      0
>DP00245      355      0
>DP00245      356      0
>DP00245      357      0
>DP00245      358      0
>DP00245      359      0
>DP00245      360      0
>DP00245      361      0
>DP00245      362      0
>DP00245      363      0
>DP00245      364      0
>DP00245      365      0
>DP00245      366      0
>DP00245      367      0
>DP00245      368      0
>DP00245      369      0
>DP00245      370      0
>DP00245      371      0
>DP00245      372      0
>DP00245      373      0
>DP00245      374      0
>DP00245      375      0
>DP00245      376      0
>DP00245      377      0
>DP00245      378      0
>DP00245      379      0
>DP00540      1      1
>DP00540      2      1
>DP00540      3      1
>DP00540      4      1
>DP00540      5      1
>DP00540      6      1
>DP00540      7      1
>DP00540      8      1
>DP00540      9      1
>DP00540      10      1
>DP00540      11      1
>DP00540      12      1
>DP00540      13      1
>DP00540      14      1
>DP00540      15      1
>DP00540      16      1
>DP00540      17      1
>DP00540      18      1
>DP00540      19      1
>DP00540      20      1
>DP00540      21      1
>DP00540      22      1
>DP00540      23      1
>DP00540      24      1
>DP00540      25      1
>DP00540      26      1
>DP00540      27      1
>DP00540      28      1
>DP00540      29      1
>DP00540      30      1
>DP00540      31      1
>DP00540      32      1
>DP00540      33      1
>DP00540      34      1
>DP00540      35      1
>DP00540      36      1
>DP00540      37      1
>DP00540      38      1
>DP00540      39      1
>DP00540      40      1
>DP00540      41      1
>DP00540      42      1
>DP00540      43      1
>DP00540      44      1
>DP00540      45      1
>DP00540      46      1
>DP00540      47      1
>DP00540      48      1
>DP00540      49      1
>DP00540      50      1
>DP00540      51      1
>DP00540      52      1
>DP00540      53      1
>DP00540      54      1
>DP00540      55      1
>DP00540      56      1
>DP00540      57      1
>DP00540      58      1
>DP00540      59      1
>DP00540      60      1
>DP00540      61      1
>DP00540      62      1
>DP00540      63      1
>DP00540      64      1
>DP00540      65      1
>DP00540      66      1
>DP00540      67      1
>DP00540      68      1
>DP00540      69      1
>DP00540      70      1
>DP00540      71      1
>DP00540      72      1
>DP00540      73      1
>DP00540      74      1
>DP00540      75      1
>DP00540      76      1
>DP00540      77      1
>DP00540      78      1
>DP00540      79      1
>DP00540      80      1
>DP00540      81      1
>DP00540      82      1
>DP00540      83      1
>DP00540      84      1
>DP00540      85      1
>DP00540      86      1
>DP00540      87      1
>DP00540      88      1
>DP00540      89      1
>DP00540      90      1
>DP00540      91      1
>DP00540      92      1
>DP00540      93      1
>DP00540      94      1
>DP00540      95      1
>DP00540      96      1
>DP00540      97      1
>DP00540      98      1
>DP00540      99      1
>DP00540      100      1
>DP00540      101      1
>DP00540      102      1
>DP00540      103      1
>DP00540      104      1
>DP00540      105      1
>DP00540      106      1
>DP00540      107      1
>DP00540      108      1
>DP00540      109      1
>DP00540      110      1
>DP00540      111      1
>DP00540      112      1
>DP00540      113      1
>DP00540      114      1
>DP00540      115      1
>DP00540      116      1
>DP00540      117      1
>DP00540      118      1
>DP00540      119      1
>DP00540      120      1
>DP00540      121      1
>DP00540      122      1
>DP00540      123      1
>DP00540      124      1
>DP00540      125      1
>DP00540      126      1
>DP00540      127      1
>DP00540      128      1
>DP00540      129      1
>DP00540      130      1
>DP00540      131      1
>DP00540      132      1
>DP00540      133      1
>DP00540      134      1
>DP00540      135      1
>DP00540      136      1
>DP00540      137      1
>DP00540      138      1
>DP00540      139      1
>DP00540      140      1
>DP00540      141      1
>DP00540      142      1
>DP00540      143      1
>DP00540      144      1
>DP00540      145      1
>DP00540      146      1
>DP00540      147      1
>DP00540      148      1
>DP00540      149      1
>DP00540      150      1
>DP00540      151      1
>DP00540      152      1
>DP00540      153      1
>DP00540      154      1
>DP00540      155      1
>DP00540      156      1
>DP00540      157      1
>DP00540      158      1
>DP00540      159      1
>DP00540      160      1
>DP00540      161      1
>DP00540      162      1
>DP00540      163      1
>DP00540      164      1
>DP00540      165      1
>DP00540      166      1
>DP00540      167      1
>DP00540      168      1
>DP00540      169      1
>DP00540      170      1
>DP00540      171      1
>DP00540      172      1
>DP00540      173      1
>DP00540      174      1
>DP00540      175      1
>DP00540      176      1
>DP00540      177      1
>DP00540      178      1
>DP00540      179      1
>DP00540      180      1
>DP00540      181      1
>DP00540      182      1
>DP00540      183      1
>DP00540      184      1
>DP00540      185      1
>DP00540      186      1
>DP00540      187      1
>DP00540      188      1
>DP00540      189      1
>DP00540      190      1
>DP00540      191      1
>DP00540      192      1
>DP00540      193      1
>DP00540      194      1
>DP00540      195      1
>DP00540      196      1
>DP00540      197      1
>DP00540      198      1
>DP00540      199      1
>DP00540      200      1
>DP00540      201      1
>DP00540      202      1
>DP00540      203      1
>DP00540      204      1
>DP00540      205      1
>DP00540      206      1
>DP00540      207      1
>DP00540      208      1
>DP00540      209      1
>DP00540      210      1
>DP00540      211      1
>DP00540      212      1
>DP00540      213      1
>DP00540      214      1
>DP00540      215      1
>DP00540      216      1
>DP00540      217      1
>DP00540      218      1
>DP00540      219      1
>DP00540      220      1
>DP00540      221      1
>DP00540      222      1
>DP00540      223      1
>DP00540      224      1
>DP00540      225      1
>DP00540      226      1
>DP00540      227      1
>DP00540      228      1
>DP00540      229      1
>DP00540      230      1
>DP00540      231      1
>DP00540      232      1
>DP00540      233      1
>DP00540      234      1
>DP00540      235      1
>DP00540      236      1
>DP00540      237      1
>DP00540      238      1
>DP00540      239      1
>DP00540      240      1
>DP00540      241      1
>DP00540      242      1
>DP00540      243      1
>DP00540      244      1
>DP00540      245      1
>DP00540      246      1
>DP00540      247      1
>DP00540      248      1
>DP00540      249      1
>DP00540      250      1
>DP00540      251      1
>DP00540      252      1
>DP00540      253      1
>DP00540      254      1
>DP00540      255      1
>DP00540      256      1
>DP00540      257      1
>DP00540      258      1
>DP00540      259      1
>DP00540      260      1
>DP00540      261      1
>DP00540      262      1
>DP00540      263      1
>DP00540      264      1
>DP00540      265      1
>DP00540      266      1
>DP00540      267      1
>DP00540      268      1
>DP00540      269      1
>DP00540      270      1
>DP00540      271      1
>DP00540      272      1
>DP00540      273      1
>DP00540      274      1
>DP00540      275      1
>DP00540      276      1
>DP00540      277      1
>DP00540      278      1
>DP00540      279      1
>DP00540      280      1
>DP00540      281      1
>DP00540      282      1
>DP00540      283      1
>DP00540      284      1
>DP00540      285      1
>DP00540      286      1
>DP00540      287      1
>DP00540      288      1
>DP00540      289      1
>DP00540      290      1
>DP00540      291      1
>DP00540      292      1
>DP00540      293      1
>DP00540      294      1
>DP00540      295      1
>DP00540      296      1
>DP00540      297      1
>DP00540      298      1
>DP00540      299      1
>DP00540      300      1
>DP00540      301      1
>DP00540      302      1
>DP00540      303      1
>DP00540      304      1
>DP00540      305      1
>DP00540      306      1
>DP00540      307      1
>DP00540      308      1
>DP00540      309      1
>DP00540      310      1
>DP00540      311      1
>DP00540      312      1
>DP00540      313      1
>DP00540      314      1
>DP00540      315      1
>DP00540      316      1
>DP00540      317      1
>DP00540      318      1
>DP00540      319      1
>DP00540      320      1
>DP00540      321      1
>DP00540      322      1
>DP00540      323      1
>DP00540      324      1
>DP00540      325      1
>DP00540      326      1
>DP00540      327      1
>DP00540      328      1
>DP00540      329      1
>DP00540      330      1
>DP00540      331      1
>DP00540      332      1
>DP00540      333      1
>DP00540      334      1
>DP00540      335      1
>DP00540      336      1
>DP00540      337      1
>DP00540      338      1
>DP00540      339      1
>DP00540      340      1
>DP00540      341      1
>DP00540      342      1
>DP00540      343      1
>DP00540      344      1
>DP00540      345      1
>1wic_A      1      0
>1wic_A      2      0
>1wic_A      3      0
>1wic_A      4      0
>1wic_A      5      0
>1wic_A      6      0
>1wic_A      7      0
>1wic_A      8      0
>1wic_A      9      0
>1wic_A      10      0
>1wic_A      11      0
>1wic_A      12      0
>1wic_A      13      0
>1wic_A      14      0
>1wic_A      15      0
>1wic_A      16      0
>1wic_A      17      0
>1wic_A      18      0
>1wic_A      19      0
>1wic_A      20      0
>1wic_A      21      0
>1wic_A      22      0
>1wic_A      23      0
>1wic_A      24      0
>1wic_A      25      0
>1wic_A      26      0
>1wic_A      27      0
>1wic_A      28      0
>1wic_A      29      0
>1wic_A      30      0
>1wic_A      31      0
>1wic_A      32      0
>1wic_A      33      0
>1wic_A      34      0
>1wic_A      35      0
>1wic_A      36      0
>1wic_A      37      0
>1wic_A      38      0
>1wic_A      39      0
>1wic_A      40      0
>1wic_A      41      0
>1wic_A      42      0
>1wic_A      43      0
>1wic_A      44      0
>1wic_A      45      0
>1wic_A      46      0
>1wic_A      47      0
>1wic_A      48      0
>1wic_A      49      0
>1wic_A      50      0
>1wic_A      51      0
>1wic_A      52      0
>1wic_A      53      0
>1wic_A      54      0
>1wic_A      55      0
>1wic_A      56      0
>1wic_A      57      0
>1wic_A      58      0
>1wic_A      59      0
>1wic_A      60      0
>1wic_A      61      0
>1wic_A      62      0
>1wic_A      63      0
>1wic_A      64      0
>1wic_A      65      0
>1wic_A      66      0
>1wic_A      67      0
>1wic_A      68      0
>1wic_A      69      0
>1wic_A      70      0
>1wic_A      71      0
>1wic_A      72      0
>1wic_A      73      0
>1wic_A      74      0
>1wic_A      75      0
>1wic_A      76      0
>1wic_A      77      0
>1wic_A      78      0
>1wic_A      79      0
>1wic_A      80      0
>1wic_A      81      0
>1wic_A      82      0
>1wic_A      83      0
>1wic_A      84      0
>1wic_A      85      0
>1wic_A      86      0
>1wic_A      87      0
>1wic_A      88      0
>1wic_A      89      0
>1wic_A      90      0
>1wic_A      91      0
>1wic_A      92      0
>1wic_A      93      0
>1wic_A      94      0
>1wic_A      95      0
>1wic_A      96      0
>1wic_A      97      0
>1wic_A      98      0
>1wic_A      99      0
>1wic_A      100      0
>1wic_A      101      0
>1wic_A      102      0
>1wic_A      103      0
>1wic_A      104      0
>1wic_A      105      0
>1wic_A      106      0
>1wic_A      107      0
>1wic_A      108      0
>1wic_A      109      0
>1wic_A      110      0
>1wic_A      111      0
>1wic_A      112      0
>1wic_A      113      0
>1wic_A      114      0
>1wic_A      115      0
>1wic_A      116      0
>1wic_A      117      0
>1wic_A      118      0
>1wic_A      119      0
>1wic_A      120      0
>1wic_A      121      0
>1wic_A      122      0
>1wic_A      123      0
>1wic_A      124      0
>1wic_A      125      0
>1wic_A      126      0
>1wic_A      127      0
>1wic_A      128      0
>1wic_A      129      0
>1wic_A      130      0
>1wic_A      131      0
>1wic_A      132      0
>1wic_A      133      0
>1wic_A      134      0
>1wic_A      135      0
[truncated: 1,235,233 more chars]
