# Supplementary material for: A Novel Method of Predicting Protein Disordered Regions Based on Sequence Features
Source: Biomed Res Int. 2013 Apr 22;2013:414327. doi: 10.1155/2013/414327 (PMC3654632; doi:10.1155/2013/414327)
Supplement: Supplementary file 3 [file 414327.f3.txt]

Online Supporting Information S3.

We calculated the Cramer¡¯s V coefficient between features and target variables. The features with the Cramer¡¯s V coefficient small than 0.1 were removed. After this procedure, 175 features remained. The 175 feature contains: 

        Feature name
  
     1  AA1_PSSM-6-Q
     2  AA1_PSSM-7-E
     3  AA1_PSSM-12-K
     4  AA1_PSSM-15-P
     5  AA1_PSSM-16-S
     6  AA1_SS-C
     7  AA1_SS-E
     8  AA1_SS-H
     9  AA2_PSSM-6-Q
    10  AA2_PSSM-7-E
    11  AA2_PSSM-12-K
    12  AA2_PSSM-15-P
    13  AA2_PSSM-16-S
    14  AA2_SS-C
    15  AA2_SS-E
    16  AA2_SS-H
    17  AA3_PSSM-6-Q
    18  AA3_PSSM-7-E
    19  AA3_PSSM-12-K
    20  AA3_PSSM-15-P
    21  AA3_PSSM-16-S
    22  AA3_SS-C
    23  AA3_SS-E
    24  AA3_SS-H
    25  AA4_PSSM-6-Q
    26  AA4_PSSM-7-E
    27  AA4_PSSM-12-K
    28  AA4_PSSM-15-P
    29  AA4_PSSM-16-S
    30  AA4_SS-C
    31  AA4_SS-E
    32  AA4_SS-H
    33  AA5_PSSM-6-Q
    34  AA5_PSSM-7-E
    35  AA5_PSSM-12-K
    36  AA5_PSSM-15-P
    37  AA5_PSSM-16-S
    38  AA5_SS-C
    39  AA5_SS-E
    40  AA5_SS-H
    41  AA6_PSSM-6-Q
    42  AA6_PSSM-7-E
    43  AA6_PSSM-12-K
    44  AA6_PSSM-15-P
    45  AA6_PSSM-16-S
    46  AA6_SS-C
    47  AA6_SS-E
    48  AA6_SS-H
    49  AA7_PSSM-1-A
    50  AA7_PSSM-6-Q
    51  AA7_PSSM-7-E
    52  AA7_PSSM-12-K
    53  AA7_PSSM-15-P
    54  AA7_PSSM-16-S
    55  AA7_SS-C
    56  AA7_SS-E
    57  AA7_SS-H
    58  AA8_PSSM-6-Q
    59  AA8_PSSM-7-E
    60  AA8_PSSM-12-K
    61  AA8_PSSM-15-P
    62  AA8_PSSM-16-S
    63  AA8_SS-C
    64  AA8_SS-E
    65  AA8_SS-H
    66  AA9_PSSM-1-A
    67  AA9_PSSM-6-Q
    68  AA9_PSSM-7-E
    69  AA9_PSSM-12-K
    70  AA9_PSSM-15-P
    71  AA9_PSSM-16-S
    72  AA9_SS-C
    73  AA9_SS-E
    74  AA9_SS-H
    75  AA10_PSSM-4-D
    76  AA10_PSSM-6-Q
    77  AA10_PSSM-7-E
    78  AA10_PSSM-12-K
    79  AA10_PSSM-15-P
    80  AA10_PSSM-16-S
    81  AA10_SS-C
    82  AA10_SS-E
    83  AA10_SS-H
    84  AA11_PSSM-6-Q
    85  AA11_PSSM-7-E
    86  AA11_PSSM-8-G
    87  AA11_PSSM-12-K
    88  AA11_PSSM-15-P
    89  AA11_PSSM-16-S
    90  AA11_SS-C
    91  AA11_SS-E
    92  AA11_SS-H
    93  AA12_PSSM-4-D
    94  AA12_PSSM-6-Q
    95  AA12_PSSM-7-E
    96  AA12_PSSM-8-G
    97  AA12_PSSM-12-K
    98  AA12_PSSM-15-P
    99  AA12_PSSM-16-S
   100  AA12_SS-C
   101  AA12_SS-E
   102  AA12_SS-H
   103  AA13_PSSM-6-Q
   104  AA13_PSSM-7-E
   105  AA13_PSSM-12-K
   106  AA13_PSSM-15-P
   107  AA13_PSSM-16-S
   108  AA13_SS-C
   109  AA13_SS-E
   110  AA13_SS-H
   111  AA14_PSSM-6-Q
   112  AA14_PSSM-7-E
   113  AA14_PSSM-12-K
   114  AA14_PSSM-15-P
   115  AA14_PSSM-16-S
   116  AA14_SS-C
   117  AA14_SS-E
   118  AA14_SS-H
   119  AA15_PSSM-4-D
   120  AA15_PSSM-6-Q
   121  AA15_PSSM-7-E
   122  AA15_PSSM-12-K
   123  AA15_PSSM-15-P
   124  AA15_PSSM-16-S
   125  AA15_SS-C
   126  AA15_SS-E
   127  AA15_SS-H
   128  AA16_PSSM-6-Q
   129  AA16_PSSM-7-E
   130  AA16_PSSM-12-K
   131  AA16_PSSM-15-P
   132  AA16_PSSM-16-S
   133  AA16_SS-C
   134  AA16_SS-E
   135  AA16_SS-H
   136  AA17_PSSM-6-Q
   137  AA17_PSSM-7-E
   138  AA17_PSSM-12-K
   139  AA17_PSSM-15-P
   140  AA17_PSSM-16-S
   141  AA17_SS-C
   142  AA17_SS-E
   143  AA17_SS-H
   144  AA18_PSSM-6-Q
   145  AA18_PSSM-7-E
   146  AA18_PSSM-12-K
   147  AA18_PSSM-15-P
   148  AA18_PSSM-16-S
   149  AA18_SS-C
   150  AA18_SS-E
   151  AA18_SS-H
   152  AA19_PSSM-6-Q
   153  AA19_PSSM-7-E
   154  AA19_PSSM-12-K
   155  AA19_PSSM-15-P
   156  AA19_PSSM-16-S
   157  AA19_SS-C
   158  AA19_SS-E
   159  AA19_SS-H
   160  AA20_PSSM-6-Q
   161  AA20_PSSM-7-E
   162  AA20_PSSM-12-K
   163  AA20_PSSM-15-P
   164  AA20_PSSM-16-S
   165  AA20_SS-C
   166  AA20_SS-E
   167  AA20_SS-H
   168  AA21_PSSM-6-Q
   169  AA21_PSSM-7-E
   170  AA21_PSSM-12-K
   171  AA21_PSSM-15-P
   172  AA21_PSSM-16-S
   173  AA21_SS-C
   174  AA21_SS-E
   175  AA21_SS-H
