# Supplementary material for: A Novel Method of Predicting Protein Disordered Regions Based on Sequence Features
Source: Biomed Res Int. 2013 Apr 22;2013:414327. doi: 10.1155/2013/414327 (PMC3654632; doi:10.1155/2013/414327)
Supplement: Supplementary file 4 [file 414327.f4.xlsx]

## Sheet: Sheet3
Online Supporting Information S4: The mRMR ranks of the features
Order	Fea	Name	Score
1	90	AA11_SS-C	0.042
2	43	AA6_PSSM-12-K	0.014
3	117	AA14_SS-E	0.015
4	141	AA17_SS-C	0.019
5	51	AA7_PSSM-7-E	0.012
6	4	AA1_PSSM-15-P	0.011
7	60	AA8_PSSM-12-K	0.009
8	30	AA4_SS-C	0.01
9	169	AA21_PSSM-7-E	0.009
10	119	AA15_PSSM-4-D	0.009
11	73	AA9_SS-E	0.009
12	105	AA13_PSSM-12-K	0.009
13	173	AA21_SS-C	0.009
14	93	AA12_PSSM-4-D	0.008
15	70	AA9_PSSM-15-P	0.007
16	115	AA14_PSSM-16-S	0.007
17	160	AA20_PSSM-6-Q	0.007
18	7	AA1_SS-E	0.007
19	75	AA10_PSSM-4-D	0.007
20	131	AA16_PSSM-15-P	0.007
21	55	AA7_SS-C	0.007
22	87	AA11_PSSM-12-K	0.007
23	153	AA19_PSSM-7-E	0.007
24	12	AA2_PSSM-15-P	0.006
25	148	AA18_PSSM-16-S	0.006
26	108	AA13_SS-C	0.007
27	27	AA4_PSSM-12-K	0.006
28	35	AA5_PSSM-12-K	0.006
29	138	AA17_PSSM-12-K	0.005
30	21	AA3_PSSM-16-S	0.005
31	158	AA19_SS-E	0.004
32	47	AA6_SS-E	0.004
33	98	AA12_PSSM-15-P	0.004
34	68	AA9_PSSM-7-E	0.003
35	163	AA20_PSSM-15-P	0.003
36	79	AA10_PSSM-15-P	0.003
37	128	AA16_PSSM-6-Q	0.003
38	14	AA2_SS-C	0.003
39	86	AA11_PSSM-8-G	0.003
40	125	AA15_SS-C	0.003
41	101	AA12_SS-E	0.003
42	1	AA1_PSSM-6-Q	0.003
43	72	AA9_SS-C	0.003
44	113	AA14_PSSM-12-K	0.003
45	171	AA21_PSSM-15-P	0.003
46	62	AA8_PSSM-16-S	0.003
47	10	AA2_PSSM-7-E	0.003
48	107	AA13_PSSM-16-S	0.003
49	53	AA7_PSSM-15-P	0.003
50	144	AA18_PSSM-6-Q	0.003
51	45	AA6_PSSM-16-S	0.002
52	122	AA15_PSSM-12-K	0.002
53	19	AA3_PSSM-12-K	0.002
54	155	AA19_PSSM-15-P	0.002
55	140	AA17_PSSM-16-S	0.002
56	28	AA4_PSSM-15-P	0.002
57	82	AA10_SS-E	0.002
58	96	AA12_PSSM-8-G	0.002
59	165	AA20_SS-C	0.002
60	134	AA16_SS-E	0.002
61	37	AA5_PSSM-16-S	0.002
62	78	AA10_PSSM-12-K	0.002
63	88	AA11_PSSM-15-P	0.002
64	39	AA5_SS-E	0.001
65	106	AA13_PSSM-15-P	0.002
66	132	AA16_PSSM-16-S	0.001
67	63	AA8_SS-C	0.002
68	147	AA18_PSSM-15-P	0.001
69	69	AA9_PSSM-12-K	0.001
70	114	AA14_PSSM-15-P	0.001
71	52	AA7_PSSM-12-K	0.001
72	5	AA1_PSSM-16-S	0.001
73	100	AA12_SS-C	0.001
74	156	AA19_PSSM-16-S	0.001
75	164	AA20_PSSM-16-S	0.001
76	61	AA8_PSSM-15-P	0.001
77	25	AA4_PSSM-6-Q	0.001
78	6	AA1_SS-C	0.001
79	174	AA21_SS-E	0.001
80	44	AA6_PSSM-15-P	0.001
81	149	AA18_SS-C	0.001
82	97	AA12_PSSM-12-K	0.001
83	124	AA15_PSSM-16-S	0.001
84	111	AA14_PSSM-6-Q	0.001
85	23	AA3_SS-E	0.001
86	104	AA13_PSSM-7-E	0.001
87	139	AA17_PSSM-15-P	0.001
88	85	AA11_PSSM-7-E	0.001
89	172	AA21_PSSM-16-S	0.001
90	116	AA14_SS-C	0.001
91	36	AA5_PSSM-15-P	0.001
92	11	AA2_PSSM-12-K	0.001
93	81	AA10_SS-C	0.001
94	17	AA3_PSSM-6-Q	0.001
95	58	AA8_PSSM-6-Q	0.001
96	91	AA11_SS-E	0.001
97	130	AA16_PSSM-12-K	0.001
98	46	AA6_SS-C	0.001
99	80	AA10_PSSM-16-S	0.001
100	41	AA6_PSSM-6-Q	0.001
101	145	AA18_PSSM-7-E	0.001
102	3	AA1_PSSM-12-K	0.001
103	123	AA15_PSSM-15-P	0.001
104	71	AA9_PSSM-16-S	0.001
105	162	AA20_PSSM-12-K	0.001
106	54	AA7_PSSM-16-S	0.001
107	64	AA8_SS-E	0.001
108	20	AA3_PSSM-15-P	0.001
109	136	AA17_PSSM-6-Q	0.001
110	154	AA19_PSSM-12-K	0.001
111	29	AA4_PSSM-16-S	0.001
112	133	AA16_SS-C	0.001
113	109	AA13_SS-E	0.001
114	170	AA21_PSSM-12-K	0
115	34	AA5_PSSM-7-E	0
116	89	AA11_PSSM-16-S	0
117	99	AA12_PSSM-16-S	0
118	13	AA2_PSSM-16-S	0
119	76	AA10_PSSM-6-Q	0
120	112	AA14_PSSM-7-E	0
121	38	AA5_SS-C	0
122	142	AA17_SS-E	0
123	59	AA8_PSSM-7-E	0
124	120	AA15_PSSM-6-Q	0
125	157	AA19_SS-C	0
126	103	AA13_PSSM-6-Q	0
127	66	AA9_PSSM-1-A	0
128	15	AA2_SS-E	0
129	42	AA6_PSSM-7-E	0
130	56	AA7_SS-E	-0.001
131	129	AA16_PSSM-7-E	0
132	49	AA7_PSSM-1-A	-0.001
133	94	AA12_PSSM-6-Q	-0.001
134	161	AA20_PSSM-7-E	0
135	146	AA18_PSSM-12-K	-0.001
136	22	AA3_SS-C	-0.001
137	67	AA9_PSSM-6-Q	-0.001
138	126	AA15_SS-E	-0.001
139	168	AA21_PSSM-6-Q	-0.001
140	152	AA19_PSSM-6-Q	-0.001
141	84	AA11_PSSM-6-Q	-0.001
142	50	AA7_PSSM-6-Q	-0.001
143	137	AA17_PSSM-7-E	-0.001
144	2	AA1_PSSM-7-E	-0.001
145	18	AA3_PSSM-7-E	-0.001
146	166	AA20_SS-E	-0.001
147	9	AA2_PSSM-6-Q	-0.001
148	77	AA10_PSSM-7-E	-0.001
149	26	AA4_PSSM-7-E	-0.001
150	31	AA4_SS-E	-0.001
151	121	AA15_PSSM-7-E	-0.001
152	33	AA5_PSSM-6-Q	-0.002
153	95	AA12_PSSM-7-E	-0.002
154	150	AA18_SS-E	-0.002
155	175	AA21_SS-H	-0.003
156	8	AA1_SS-H	-0.007
157	167	AA20_SS-H	-0.009
158	110	AA13_SS-H	-0.012
159	16	AA2_SS-H	-0.013
160	143	AA17_SS-H	-0.013
161	65	AA8_SS-H	-0.014
162	32	AA4_SS-H	-0.016
163	159	AA19_SS-H	-0.017
164	83	AA10_SS-H	-0.018
165	127	AA15_SS-H	-0.019
166	48	AA6_SS-H	-0.02
167	151	AA18_SS-H	-0.022
168	24	AA3_SS-H	-0.023
169	102	AA12_SS-H	-0.023
170	74	AA9_SS-H	-0.026
171	135	AA16_SS-H	-0.027
172	40	AA5_SS-H	-0.028
173	118	AA14_SS-H	-0.029
174	57	AA7_SS-H	-0.031
175	92	AA11_SS-H	-0.032
