# Supplementary material for: A Novel Method of Predicting Protein Disordered Regions Based on Sequence Features
Source: Biomed Res Int. 2013 Apr 22;2013:414327. doi: 10.1155/2013/414327 (PMC3654632; doi:10.1155/2013/414327)
Supplement: Supplementary file 5 [file 414327.f5.xlsx]

## Sheet: Sheet1
Online Support Information S5:The IFS results on training set evaluated by 10-fold cross-validation
Number of features	ACC (Accuracy)	MCC (Matthews's correlation coefficient)	SN (sensitivity)	SP (specificity)
1	61.8386	0.240524	0.530419	0.706353
2	63.7007	0.274396	0.610619	0.663394
3	65.0149	0.300642	0.674054	0.626244
4	65.3076	0.307723	0.703528	0.602624
5	65.7506	0.315392	0.682026	0.632986
6	65.0149	0.300365	0.639615	0.660684
7	63.0071	0.260218	0.617999	0.642143
8	62.9911	0.259823	0.629638	0.630185
9	63.8635	0.278221	0.679931	0.59734
10	64.9511	0.301109	0.708266	0.590757
11	65.3338	0.308848	0.712525	0.594151
12	65.9841	0.322336	0.723869	0.595813
13	66.3383	0.32958	0.728583	0.598182
14	66.7608	0.338193	0.7338	0.601417
15	66.9783	0.342689	0.737125	0.602442
16	67.3257	0.349741	0.74102	0.605494
17	67.4236	0.351834	0.743184	0.605289
18	67.6389	0.356175	0.745279	0.607498
19	67.8439	0.360468	0.748833	0.608045
20	67.8211	0.3601	0.749493	0.606929
21	67.8496	0.360523	0.748309	0.608683
22	68.3438	0.370371	0.751953	0.614924
23	68.2937	0.369382	0.75168	0.614195
24	68.2664	0.369117	0.754117	0.611211
25	68.2892	0.369594	0.754504	0.611279
26	68.4031	0.371748	0.754276	0.613785
27	68.2972	0.369921	0.756099	0.609844
28	68.2869	0.369583	0.7548	0.610938
29	68.5637	0.375162	0.757443	0.61383
30	68.5375	0.374534	0.756281	0.614468
31	68.4942	0.373802	0.757146	0.612737
32	68.509	0.37405	0.756828	0.613352
33	68.6388	0.376621	0.757648	0.615129
34	68.394	0.371894	0.757215	0.610664
35	68.6958	0.377779	0.758285	0.61563
36	68.6103	0.376264	0.759333	0.612874
37	68.7983	0.379926	0.759994	0.615972
38	68.5659	0.375128	0.756736	0.614582
39	68.706	0.377915	0.757739	0.616382
40	68.5523	0.375153	0.75931	0.611735
41	68.6365	0.376525	0.757169	0.615562
42	68.6969	0.377963	0.759743	0.614195
43	68.7231	0.378281	0.758103	0.616359
44	68.7208	0.378371	0.75931	0.615106
45	68.9429	0.382681	0.759925	0.618933
46	68.7652	0.379242	0.759515	0.615789
47	68.722	0.378472	0.760016	0.614423
48	68.6513	0.377184	0.76054	0.612487
49	68.5864	0.375731	0.75865	0.613079
50	68.7117	0.378071	0.758171	0.616063
51	68.796	0.37987	0.75988	0.61604
52	68.8153	0.380324	0.760631	0.615675
53	68.9008	0.382044	0.761429	0.616587
54	68.6411	0.376874	0.759538	0.613284
55	68.9099	0.382103	0.760404	0.617794
56	69.0181	0.384303	0.761611	0.61875
57	68.9019	0.38204	0.761201	0.616837
58	68.8313	0.380703	0.761292	0.615334
59	68.7538	0.379032	0.759584	0.615493
60	68.8096	0.380436	0.762567	0.613625
61	68.9509	0.383242	0.763547	0.61547
62	68.7835	0.379725	0.760723	0.614947
63	69.0841	0.385936	0.764868	0.616814
64	68.87	0.381426	0.761155	0.616245
65	69.0112	0.384168	0.761565	0.618659
66	68.9304	0.382828	0.763342	0.615265
67	68.9144	0.382471	0.762886	0.615402
68	68.7106	0.378049	0.758171	0.61604
69	68.9782	0.383656	0.762613	0.616951
70	68.8529	0.381375	0.763547	0.613512
71	68.9885	0.383883	0.762886	0.616883
72	68.7607	0.379299	0.760791	0.614423
73	68.8962	0.382345	0.764777	0.613147
74	68.9121	0.382433	0.762932	0.615311
75	69.0761	0.385409	0.761588	0.619935
76	68.8393	0.380765	0.760495	0.61629
77	68.7823	0.379619	0.759971	0.615675
78	69.0067	0.384058	0.76136	0.618773
79	68.8427	0.381077	0.762659	0.614195
80	68.9862	0.383626	0.760996	0.618728
81	68.837	0.380706	0.760358	0.616382
82	68.8586	0.381543	0.764048	0.613124
83	68.7436	0.379153	0.762362	0.612509
84	68.903	0.381947	0.760176	0.617885
85	69.0465	0.385092	0.763775	0.617156
86	68.9497	0.383007	0.761679	0.617315
87	68.968	0.383489	0.762864	0.616495
88	68.9383	0.382818	0.76193	0.616837
89	69.0807	0.385733	0.763684	0.61793
90	68.7117	0.377999	0.757511	0.616723
91	68.862	0.381248	0.760927	0.616313
92	68.8461	0.381076	0.762089	0.614833
93	69.0363	0.384759	0.762567	0.618158
94	68.944	0.383219	0.764458	0.614423
95	68.9224	0.382589	0.76259	0.615858
96	68.968	0.383555	0.763433	0.615926
97	68.9497	0.383163	0.763046	0.615949
98	68.9201	0.382543	0.762567	0.615835
99	68.8358	0.380803	0.761406	0.615311
100	68.8233	0.380564	0.761406	0.61506
101	68.9076	0.382208	0.761725	0.616427
102	69.1058	0.386377	0.765119	0.616997
103	68.8506	0.381129	0.761793	0.61522
104	69.1103	0.386421	0.764754	0.617452
105	69.042	0.384956	0.763342	0.617498
106	68.9429	0.383061	0.763296	0.615562
107	68.7163	0.378366	0.760039	0.614286
108	68.9281	0.382758	0.763114	0.615448
109	69.0807	0.385666	0.763091	0.618523
110	68.8746	0.381627	0.762157	0.615334
111	69.0215	0.384594	0.763592	0.616837
112	69.2561	0.389311	0.765711	0.619411
113	69.1433	0.387383	0.767556	0.615311
114	68.7413	0.379075	0.762066	0.61276
115	68.8837	0.38178	0.761975	0.615698
116	68.804	0.380458	0.763684	0.612396
117	68.8973	0.382132	0.762772	0.615174
118	68.9839	0.384053	0.765096	0.614582
119	69.0431	0.385165	0.764959	0.615903
120	68.9065	0.382241	0.762203	0.615926
121	69.1342	0.386843	0.764458	0.618227
122	68.6741	0.377561	0.760039	0.613443
123	69.05	0.385368	0.765574	0.615425
124	68.7664	0.379543	0.761975	0.613352
125	69.0522	0.385081	0.762727	0.618318
126	68.9828	0.38398	0.764663	0.614992
127	68.9008	0.382142	0.762294	0.615721
128	69.2549	0.38952	0.76767	0.617429
129	68.919	0.382661	0.763775	0.614605
130	68.7425	0.379	0.761224	0.613625
131	68.9987	0.384107	0.763137	0.616837
132	69.0055	0.38429	0.763592	0.616518
133	69.0067	0.384317	0.763638	0.616495
134	69.0488	0.385341	0.765529	0.615448
135	68.7527	0.379237	0.761588	0.613466
136	69.1001	0.386477	0.766872	0.615129
137	69.198	0.388467	0.76792	0.61604
138	69.0226	0.384748	0.764731	0.615721
139	69.0112	0.384687	0.766052	0.614172
140	69.1638	0.38754	0.765597	0.61768
141	69.0443	0.385126	0.764435	0.61645
142	68.9497	0.383421	0.765255	0.613739
143	69.1228	0.386658	0.764731	0.617725
144	69.0238	0.384907	0.765893	0.614582
145	69.1991	0.388563	0.768535	0.615448
146	68.8222	0.380911	0.764572	0.611872
147	69.1673	0.38784	0.767579	0.615767
148	69.2196	0.388824	0.767465	0.616928
149	69.0306	0.385185	0.767123	0.613489
150	69.0989	0.386173	0.764481	0.617498
151	68.9941	0.383989	0.762864	0.617019
152	68.7857	0.380135	0.763889	0.611826
153	68.8415	0.381274	0.764526	0.612304
154	69.0112	0.384606	0.765369	0.614855
155	69.0693	0.385718	0.765415	0.615972
156	69.0522	0.385291	0.764549	0.616495
157	68.9566	0.383199	0.762226	0.616905
158	69.2401	0.389249	0.767761	0.617042
159	69.001	0.384216	0.763706	0.616313
160	69.0636	0.385489	0.76439	0.616883
161	69.2162	0.388675	0.766759	0.617566
162	69.042	0.385032	0.764002	0.616837
163	69.231	0.388668	0.764276	0.620345
164	69.0682	0.38565	0.765027	0.616336
165	68.9805	0.383868	0.764071	0.615539
166	69.1878	0.388316	0.768285	0.61547
167	69.1729	0.387492	0.763684	0.619775
168	69.0739	0.385396	0.761861	0.619616
169	69.0989	0.386455	0.766872	0.615106
170	69.19	0.388031	0.765529	0.618272
171	69.0386	0.38529	0.766736	0.614035
172	69.1103	0.386718	0.76726	0.614947
173	68.9087	0.382368	0.762932	0.615243
174	69.1399	0.387122	0.765916	0.616883
175	69.0169	0.384779	0.765916	0.614423
