# Supplementary material for: A Novel Method of Predicting Protein Disordered Regions Based on Sequence Features
Source: Biomed Res Int. 2013 Apr 22;2013:414327. doi: 10.1155/2013/414327 (PMC3654632; doi:10.1155/2013/414327)
Supplement: Supplementary file 6 [file 414327.f6.xlsx]

## Sheet: Sheet1
Online Supporting Information S6: The optimal feature subset including 128 features
Feature Name
AA11_SS-C
AA6_PSSM-12-K
AA14_SS-E
AA17_SS-C
AA7_PSSM-7-E
AA1_PSSM-15-P
AA8_PSSM-12-K
AA4_SS-C
AA21_PSSM-7-E
AA15_PSSM-4-D
AA9_SS-E
AA13_PSSM-12-K
AA21_SS-C
AA12_PSSM-4-D
AA9_PSSM-15-P
AA14_PSSM-16-S
AA20_PSSM-6-Q
AA1_SS-E
AA10_PSSM-4-D
AA16_PSSM-15-P
AA7_SS-C
AA11_PSSM-12-K
AA19_PSSM-7-E
AA2_PSSM-15-P
AA18_PSSM-16-S
AA13_SS-C
AA4_PSSM-12-K
AA5_PSSM-12-K
AA17_PSSM-12-K
AA3_PSSM-16-S
AA19_SS-E
AA6_SS-E
AA12_PSSM-15-P
AA9_PSSM-7-E
AA20_PSSM-15-P
AA10_PSSM-15-P
AA16_PSSM-6-Q
AA2_SS-C
AA11_PSSM-8-G
AA15_SS-C
AA12_SS-E
AA1_PSSM-6-Q
AA9_SS-C
AA14_PSSM-12-K
AA21_PSSM-15-P
AA8_PSSM-16-S
AA2_PSSM-7-E
AA13_PSSM-16-S
AA7_PSSM-15-P
AA18_PSSM-6-Q
AA6_PSSM-16-S
AA15_PSSM-12-K
AA3_PSSM-12-K
AA19_PSSM-15-P
AA17_PSSM-16-S
AA4_PSSM-15-P
AA10_SS-E
AA12_PSSM-8-G
AA20_SS-C
AA16_SS-E
AA5_PSSM-16-S
AA10_PSSM-12-K
AA11_PSSM-15-P
AA5_SS-E
AA13_PSSM-15-P
AA16_PSSM-16-S
AA8_SS-C
AA18_PSSM-15-P
AA9_PSSM-12-K
AA14_PSSM-15-P
AA7_PSSM-12-K
AA1_PSSM-16-S
AA12_SS-C
AA19_PSSM-16-S
AA20_PSSM-16-S
AA8_PSSM-15-P
AA4_PSSM-6-Q
AA1_SS-C
AA21_SS-E
AA6_PSSM-15-P
AA18_SS-C
AA12_PSSM-12-K
AA15_PSSM-16-S
AA14_PSSM-6-Q
AA3_SS-E
AA13_PSSM-7-E
AA17_PSSM-15-P
AA11_PSSM-7-E
AA21_PSSM-16-S
AA14_SS-C
AA5_PSSM-15-P
AA2_PSSM-12-K
AA10_SS-C
AA3_PSSM-6-Q
AA8_PSSM-6-Q
AA11_SS-E
AA16_PSSM-12-K
AA6_SS-C
AA10_PSSM-16-S
AA6_PSSM-6-Q
AA18_PSSM-7-E
AA1_PSSM-12-K
AA15_PSSM-15-P
AA9_PSSM-16-S
AA20_PSSM-12-K
AA7_PSSM-16-S
AA8_SS-E
AA3_PSSM-15-P
AA17_PSSM-6-Q
AA19_PSSM-12-K
AA4_PSSM-16-S
AA16_SS-C
AA13_SS-E
AA21_PSSM-12-K
AA5_PSSM-7-E
AA11_PSSM-16-S
AA12_PSSM-16-S
AA2_PSSM-16-S
AA10_PSSM-6-Q
AA14_PSSM-7-E
AA5_SS-C
AA17_SS-E
AA8_PSSM-7-E
AA15_PSSM-6-Q
AA19_SS-C
AA13_PSSM-6-Q
AA9_PSSM-1-A
AA2_SS-E
