# Supplementary material for: A Novel Method of Predicting Protein Disordered Regions Based on Sequence Features
Source: Biomed Res Int. 2013 Apr 22;2013:414327. doi: 10.1155/2013/414327 (PMC3654632; doi:10.1155/2013/414327)
Supplement: Supplementary file 7 [file 414327.f7.txt]

Online Supporting Information S7.

The third column, predicted, shows the prediction result where number ��1�� means the residue in the order region and number ��2�� means the residue in the disorder region. 
The scanning result can be found in the last column, scanning.

=== Predictions on test data === 
inst#     actual  predicted error pred scanning                                  
     1      1:ord      2:dis   +   0.8  2
     2      1:ord      2:dis   +   0.7  2
     3      1:ord      1:ord       0.5  1
     4      1:ord      1:ord       0.7  1
     5      1:ord      2:dis   +   0.7  2
     6      1:ord      2:dis   +   0.6  2
     7      1:ord      1:ord       0.5  1
     8      1:ord      1:ord       0.6  1
     9      1:ord      1:ord       0.8  1
    10      1:ord      1:ord       0.5  1
    11      1:ord      2:dis   +   0.7  1
    12      1:ord      1:ord       0.5  1
    13      1:ord      1:ord       0.5  1
    14      1:ord      1:ord       0.7  1
    15      1:ord      1:ord       0.6  1
    16      1:ord      1:ord       0.6  1
    17      1:ord      1:ord       0.8  1
    18      1:ord      1:ord       0.7  1
    19      1:ord      1:ord       0.7  1
    20      1:ord      1:ord       0.7  1
    21      1:ord      1:ord       0.6  1
    22      1:ord      1:ord       0.5  1
    23      1:ord      1:ord       0.8  1
    24      1:ord      1:ord       0.8  1
    25      1:ord      1:ord       0.6  1
    26      1:ord      1:ord       0.6  1
    27      1:ord      1:ord       0.7  1
    28      1:ord      1:ord       0.5  1
    29      1:ord      1:ord       0.5  1
    30      1:ord      1:ord       0.6  1
    31      1:ord      1:ord       0.8  1
    32      1:ord      1:ord       0.6  1
    33      1:ord      2:dis   +   0.6  1
    34      1:ord      1:ord       0.6  1
    35      1:ord      2:dis   +   0.7  1
    36      1:ord      1:ord       1  1
    37      1:ord      1:ord       0.5  1
    38      1:ord      2:dis   +   0.6  1
    39      1:ord      1:ord       0.8  1
    40      1:ord      1:ord       0.8  1
    41      1:ord      1:ord       0.6  1
    42      1:ord      1:ord       0.5  1
    43      1:ord      1:ord       0.6  1
    44      1:ord      1:ord       0.6  1
    45      1:ord      1:ord       0.6  1
    46      1:ord      1:ord       0.6  1
    47      1:ord      1:ord       0.5  1
    48      1:ord      1:ord       0.7  1
    49      1:ord      1:ord       0.8  1
    50      1:ord      2:dis   +   0.6  1
    51      1:ord      1:ord       0.7  1
    52      1:ord      1:ord       0.6  1
    53      1:ord      1:ord       0.8  1
    54      1:ord      1:ord       0.6  1
    55      1:ord      1:ord       0.8  1
    56      1:ord      1:ord       0.7  1
    57      1:ord      1:ord       0.7  1
    58      1:ord      1:ord       0.6  1
    59      1:ord      1:ord       0.6  1
    60      1:ord      1:ord       0.5  1
    61      1:ord      1:ord       0.8  1
    62      1:ord      1:ord       0.7  1
    63      1:ord      1:ord       0.9  1
    64      1:ord      1:ord       0.8  1
    65      1:ord      1:ord       0.5  1
    66      1:ord      1:ord       0.9  1
    67      1:ord      1:ord       0.7  1
    68      1:ord      1:ord       0.7  1
    69      1:ord      1:ord       0.5  1
    70      1:ord      1:ord       0.9  1
    71      1:ord      1:ord       0.7  1
    72      1:ord      1:ord       0.7  1
    73      1:ord      1:ord       0.6  1
    74      1:ord      1:ord       0.6  1
    75      1:ord      1:ord       0.75  1
    76      1:ord      1:ord       0.8  1
    77      1:ord      1:ord       0.8  1
    78      1:ord      1:ord       0.9  1
    79      1:ord      1:ord       0.5  1
    80      1:ord      1:ord       0.8  1
    81      1:ord      1:ord       0.6  1
    82      1:ord      1:ord       0.8  1
    83      1:ord      1:ord       0.7  1
    84      1:ord      1:ord       0.6  1
    85      1:ord      1:ord       0.5  1
    86      1:ord      1:ord       0.5  1
    87      1:ord      1:ord       0.7  1
    88      1:ord      1:ord       0.6  1
    89      1:ord      1:ord       0.8  1
    90      1:ord      1:ord       0.9  1
    91      1:ord      1:ord       0.5  1
    92      1:ord      1:ord       1  1
    93      1:ord      1:ord       0.6  1
    94      1:ord      2:dis   +   0.6  1
    95      1:ord      1:ord       0.7  1
    96      1:ord      1:ord       0.7  1
    97      1:ord      1:ord       0.8  1
    98      1:ord      1:ord       0.7  1
    99      1:ord      1:ord       1  1
   100      1:ord      1:ord       0.7  1
   101      1:ord      1:ord       0.8  1
   102      1:ord      1:ord       0.5  1
   103      1:ord      1:ord       0.8  1
   104      1:ord      1:ord       0.5  1
   105      1:ord      1:ord       0.9  1
   106      1:ord      1:ord       0.6  1
   107      1:ord      1:ord       0.5  1
   108      1:ord      1:ord       0.8  1
   109      1:ord      1:ord       0.7  1
   110      1:ord      1:ord       0.5  1
   111      1:ord      1:ord       0.5  1
   112      1:ord      1:ord       0.6  1
   113      1:ord      1:ord       0.6  1
   114      1:ord      2:dis   +   0.6  1
   115      1:ord      1:ord       0.6  1
   116      1:ord      1:ord       0.5  1
   117      1:ord      1:ord       0.5  1
   118      1:ord      2:dis   +   0.6  2
   119      1:ord      2:dis   +   0.6  2
   120      1:ord      2:dis   +   0.6  2
   121      1:ord      2:dis   +   0.7  2
   122      1:ord      2:dis   +   0.8  2
   123      1:ord      2:dis   +   0.9  2
   124      1:ord      2:dis   +   0.6  2
   125      1:ord      2:dis   +   0.7  2
   126      1:ord      1:ord       0.5  2
   127      1:ord      2:dis   +   0.7  2
   128      1:ord      2:dis   +   0.7  2
   129      2:dis      2:dis       0.6  2
   130      2:dis      2:dis       0.7  2
   131      2:dis      1:ord   +   0.6  2
   132      2:dis      1:ord   +   0.7  2
   133      2:dis      2:dis       0.7  2
   134      2:dis      1:ord   +   0.5  2
   135      1:ord      2:dis   +   0.7  2
   136      1:ord      2:dis   +   0.9  2
   137      1:ord      2:dis   +   0.6  2
   138      1:ord      1:ord       0.5  1
   139      1:ord      1:ord       0.5  1
   140      1:ord      1:ord       0.6  1
   141      1:ord      1:ord       0.5  1
   142      1:ord      2:dis   +   0.7  1
   143      1:ord      1:ord       0.6  1
   144      1:ord      1:ord       0.5  1
   145      1:ord      2:dis   +   0.8  1
   146      1:ord      1:ord       0.5  1
   147      1:ord      1:ord       0.5  1
   148      1:ord      1:ord       0.5  1
   149      1:ord      2:dis   +   0.6  2
   150      1:ord      2:dis   +   0.7  2
   151      1:ord      2:dis   +   0.7  2
   152      1:ord      2:dis   +   0.6  2
   153      1:ord      2:dis   +   0.8  2
   154      1:ord      1:ord       0.7  1
   155      1:ord      1:ord       0.7  1
   156      1:ord      1:ord       0.5  1
   157      1:ord      1:ord       0.6  1
   158      1:ord      1:ord       0.5  1
   159      1:ord      2:dis   +   0.6  1
   160      1:ord      1:ord       0.6  1
   161      1:ord      1:ord       0.8  1
   162      1:ord      1:ord       0.7  1
   163      1:ord      1:ord       0.6  1
   164      1:ord      1:ord       0.6  1
   165      1:ord      1:ord       0.8  1
   166      1:ord      1:ord       0.7  1
   167      1:ord      1:ord       0.7  1
   168      1:ord      1:ord       0.7  1
   169      1:ord      1:ord       0.7  1
   170      1:ord      1:ord       0.6  1
   171      1:ord      1:ord       0.8  1
   172      1:ord      1:ord       0.5  1
   173      1:ord      1:ord       0.7  1
   174      1:ord      1:ord       0.6  1
   175      1:ord      1:ord       0.8  1
   176      1:ord      1:ord       0.8  1
   177      1:ord      1:ord       0.7  1
   178      1:ord      1:ord       1  1
   179      1:ord      1:ord       0.7  1
   180      1:ord      1:ord       0.6  1
   181      1:ord      1:ord       0.8  1
   182      1:ord      1:ord       0.9  1
   183      1:ord      1:ord       0.7  1
   184      1:ord      1:ord       0.7  1
   185      1:ord      1:ord       0.8  1
   186      1:ord      1:ord       0.6  1
   187      1:ord      1:ord       0.8  1
   188      1:ord      1:ord       0.7  1
   189      1:ord      1:ord       0.9  1
   190      1:ord      1:ord       0.7  1
   191      1:ord      1:ord       0.9  1
   192      1:ord      1:ord       0.9  1
   193      1:ord      1:ord       0.9  1
   194      1:ord      1:ord       0.7  1
   195      1:ord      1:ord       0.7  1
   196      1:ord      1:ord       0.7  1
   197      1:ord      1:ord       0.6  1
   198      1:ord      1:ord       0.8  1
   199      1:ord      1:ord       0.7  1
   200      1:ord      1:ord       0.6  1
   201      1:ord      1:ord       0.7  1
   202      1:ord      1:ord       0.6  1
   203      1:ord      2:dis   +   0.6  1
   204      1:ord      1:ord       0.7  1
   205      1:ord      1:ord       0.7  1
   206      1:ord      1:ord       0.7  1
   207      1:ord      1:ord       0.6  1
   208      1:ord      1:ord       0.8  1
   209      1:ord      1:ord       0.9  1
   210      1:ord      1:ord       0.9  1
   211      1:ord      1:ord       0.7  1
   212      1:ord      1:ord       0.8  1
   213      1:ord      1:ord       0.7  1
   214      1:ord      1:ord       0.8  1
   215      1:ord      1:ord       0.7  1
   216      1:ord      1:ord       0.6  1
   217      1:ord      1:ord       1  1
   218      1:ord      1:ord       0.8  1
   219      1:ord      1:ord       0.9  1
   220      1:ord      1:ord       0.7  1
   221      1:ord      1:ord       0.9  1
   222      1:ord      1:ord       0.6  1
   223      1:ord      1:ord       0.6  1
   224      1:ord      1:ord       0.7  1
   225      1:ord      2:dis   +   0.6  1
   226      1:ord      2:dis   +   0.6  1
   227      1:ord      2:dis   +   0.6  1
   228      1:ord      1:ord       0.6  1
   229      1:ord      2:dis   +   0.6  1
   230      1:ord      2:dis   +   0.7  1
   231      1:ord      2:dis   +   0.6  1
   232      1:ord      2:dis   +   0.7  1
   233      1:ord      1:ord       0.5  1
   234      1:ord      2:dis   +   0.8  1
   235      1:ord      2:dis   +   0.7  1
   236      1:ord      1:ord       0.6  1
   237      1:ord      1:ord       0.7  1
   238      1:ord      1:ord       0.7  1
   239      1:ord      1:ord       0.5  1
   240      1:ord      1:ord       0.8  1
   241      1:ord      2:dis   +   0.6  1
   242      1:ord      1:ord       0.7  1
   243      1:ord      1:ord       0.7  1
   244      1:ord      1:ord       0.9  1
   245      1:ord      1:ord       0.9  1
   246      1:ord      1:ord       0.7  1
   247      1:ord      1:ord       0.9  1
   248      1:ord      1:ord       0.9  1
   249      1:ord      1:ord       0.7  1
   250      1:ord      1:ord       0.7  1
   251      1:ord      1:ord       0.9  1
   252      1:ord      1:ord       1  1
   253      1:ord      1:ord       0.6  1
   254      1:ord      1:ord       0.8  1
   255      1:ord      1:ord       0.9  1
   256      1:ord      1:ord       0.9  1
   257      1:ord      1:ord       0.8  1
   258      1:ord      1:ord       0.5  1
   259      1:ord      1:ord       0.9  1
   260      1:ord      1:ord       0.9  1
   261      1:ord      1:ord       0.7  1
   262      1:ord      1:ord       0.8  1
   263      1:ord      1:ord       0.8  1
   264      1:ord      1:ord       0.8  1
   265      1:ord      1:ord       0.8  1
   266      1:ord      1:ord       1  1
   267      1:ord      1:ord       0.9  1
   268      1:ord      1:ord       0.8  1
   269      1:ord      1:ord       0.6  1
   270      1:ord      1:ord       0.6  1
   271      1:ord      1:ord       0.7  1
   272      1:ord      1:ord       0.8  1
   273      1:ord      1:ord       0.6  1
   274      1:ord      1:ord       0.9  1
   275      1:ord      1:ord       0.8  1
   276      1:ord      1:ord       0.9  1
   277      1:ord      1:ord       0.8  1
   278      1:ord      1:ord       1  1
   279      1:ord      1:ord       0.7  1
   280      1:ord      1:ord       0.9  1
   281      1:ord      1:ord       0.8  1
   282      1:ord      2:dis   +   0.6  1
   283      1:ord      1:ord       0.6  1
   284      1:ord      1:ord       0.7  1
   285      1:ord      1:ord       0.8  1
   286      1:ord      1:ord       0.5  1
   287      1:ord      1:ord       0.8  1
   288      1:ord      1:ord       0.7  1
   289      1:ord      1:ord       0.8  1
   290      1:ord      1:ord       0.7  1
   291      1:ord      1:ord       0.9  1
   292      1:ord      1:ord       1  1
   293      1:ord      1:ord       0.8  1
   294      1:ord      1:ord       0.8  1
   295      1:ord      1:ord       0.9  1
   296      1:ord      1:ord       0.8  1
   297      1:ord      1:ord       0.8  1
   298      1:ord      1:ord       0.7  1
   299      1:ord      1:ord       0.7  1
   300      1:ord      1:ord       0.5  1
   301      1:ord      1:ord       0.6  1
   302      1:ord      1:ord       0.6  1
   303      1:ord      1:ord       0.9  1
   304      1:ord      1:ord       0.8  1
   305      1:ord      1:ord       0.8  1
   306      1:ord      1:ord       0.9  1
   307      1:ord      1:ord       0.9  1
   308      1:ord      1:ord       1  1
   309      1:ord      1:ord       1  1
   310      1:ord      1:ord       0.6  1
   311      1:ord      1:ord       0.7  1
   312      1:ord      1:ord       0.6  1
   313      1:ord      1:ord       0.9  1
   314      1:ord      1:ord       1  1
   315      1:ord      1:ord       0.9  1
   316      1:ord      1:ord       0.9  1
   317      1:ord      1:ord       0.7  1
   318      1:ord      1:ord       1  1
   319      1:ord      1:ord       0.7  1
   320      1:ord      1:ord       0.7  1
   321      1:ord      1:ord       0.8  1
   322      1:ord      1:ord       0.7  1
   323      1:ord      1:ord       0.7  1
   324      1:ord      1:ord       0.8  1
   325      1:ord      1:ord       0.6  1
   326      1:ord      1:ord       0.5  1
   327      1:ord      1:ord       0.7  1
   328      1:ord      1:ord       0.8  1
   329      1:ord      1:ord       0.7  1
   330      1:ord      1:ord       0.8  1
   331      1:ord      1:ord       0.9  1
   332      1:ord      1:ord       0.9  1
   333      1:ord      1:ord       0.7  1
   334      1:ord      1:ord       0.9  1
   335      1:ord      1:ord       0.7  1
   336      1:ord      1:ord       0.8  1
   337      1:ord      1:ord       0.9  1
   338      1:ord      1:ord       0.9  1
   339      1:ord      1:ord       0.8  1
   340      1:ord      1:ord       0.8  1
   341      1:ord      1:ord       1  1
   342      1:ord      1:ord       0.7  1
   343      1:ord      1:ord       0.8  1
   344      1:ord      1:ord       0.9  1
   345      1:ord      1:ord       0.8  1
   346      1:ord      1:ord       0.9  1
   347      1:ord      1:ord       1  1
   348      1:ord      1:ord       0.7  1
   349      1:ord      1:ord       1  1
   350      1:ord      1:ord       0.5  1
   351      1:ord      1:ord       0.8  1
   352      1:ord      1:ord       0.7  1
   353      1:ord      1:ord       0.7  1
   354      1:ord      2:dis   +   0.6  1
   355      1:ord      1:ord       0.9  1
   356      1:ord      1:ord       0.9  1
   357      1:ord      1:ord       0.8  1
   358      1:ord      1:ord       0.5  1
   359      1:ord      2:dis   +   0.65  1
   360      1:ord      2:dis   +   0.6  1
   361      1:ord      1:ord       0.6  1
   362      1:ord      2:dis   +   0.7  2
   363      1:ord      2:dis   +   0.7  2
   364      1:ord      2:dis   +   0.7  2
   365      1:ord      2:dis   +   0.6  2
   366      1:ord      2:dis   +   0.6  2
   367      1:ord      2:dis   +   0.9  2
   368      1:ord      2:dis   +   0.8  2
   369      1:ord      2:dis   +   0.8  2
   370      1:ord      2:dis   +   0.9  2
   371      1:ord      1:ord       0.7  2
   372      1:ord      2:dis   +   1  2
   373      1:ord      1:ord       0.6  2
   374      1:ord      2:dis   +   0.7  2
   375      1:ord      2:dis   +   0.7  2
   376      1:ord      2:dis   +   0.6  2
   377      1:ord      2:dis   +   0.7  2
   378      1:ord      2:dis   +   0.7  2
   379      1:ord      2:dis   +   0.6  2
   380      1:ord      2:dis   +   0.6  2
   381      1:ord      1:ord       0.5  2
   382      1:ord      1:ord       0.5  2
   383      1:ord      1:ord       0.5  2
   384      1:ord      2:dis   +   0.6  2
   385      1:ord      1:ord       0.6  1
   386      1:ord      1:ord       0.7  1
   387      1:ord      1:ord       0.5  1
   388      1:ord      1:ord       0.8  1
   389      1:ord      2:dis   +   0.6  1
   390      1:ord      1:ord       0.7  1
   391      1:ord      1:ord       0.6  1
   392      1:ord      1:ord       0.7  1
   393      1:ord      1:ord       0.8  1
   394      1:ord      1:ord       0.6  1
   395      1:ord      1:ord       0.8  1
   396      1:ord      1:ord       0.8  1
   397      1:ord      1:ord       0.7  1
   398      1:ord      1:ord       1  1
   399      1:ord      1:ord       0.7  1
   400      1:ord      1:ord       1  1
   401      1:ord      1:ord       1  1
   402      1:ord      1:ord       0.8  1
   403      1:ord      1:ord       1  1
   404      1:ord      1:ord       0.9  1
   405      1:ord      1:ord       0.9  1
   406      1:ord      1:ord       0.7  1
   407      1:ord      1:ord       1  1
   408      1:ord      1:ord       0.9  1
   409      1:ord      1:ord       0.8  1
   410      1:ord      1:ord       1  1
   411      1:ord      1:ord       0.6  1
   412      1:ord      1:ord       0.9  1
   413      1:ord      1:ord       1  1
   414      1:ord      1:ord       0.9  1
   415      1:ord      1:ord       0.9  1
   416      1:ord      1:ord       0.5  1
   417      1:ord      1:ord       0.8  1
   418      1:ord      1:ord       0.8  1
   419      1:ord      1:ord       0.6  1
   420      1:ord      1:ord       0.8  1
   421      1:ord      1:ord       0.9  1
   422      1:ord      1:ord       0.6  1
   423      1:ord      1:ord       0.7  1
   424      1:ord      1:ord       0.6  1
   425      1:ord      1:ord       0.5  1
   426      1:ord      1:ord       0.7  1
   427      1:ord      1:ord       0.7  1
   428      1:ord      1:ord       0.5  1
   429      1:ord      2:dis   +   0.6  1
   430      1:ord      2:dis   +   0.6  1
   431      1:ord      2:dis   +   0.7  1
   432      1:ord      2:dis   +   0.6  1
   433      1:ord      1:ord       0.5  1
   434      1:ord      2:dis   +   0.6  1
   435      1:ord      1:ord       0.5  1
   436      1:ord      1:ord       0.5  1
   437      1:ord      1:ord       0.6  1
   438      1:ord      1:ord       0.9  1
   439      1:ord      2:dis   +   0.8  1
   440      1:ord      1:ord       0.6  1
   441      1:ord      2:dis   +   0.6  1
   442      1:ord      1:ord       0.6  1
   443      1:ord      1:ord       0.5  1
   444      1:ord      1:ord       0.5  1
   445      1:ord      1:ord       0.8  1
   446      1:ord      1:ord       0.7  1
   447      1:ord      1:ord       0.9  1
   448      1:ord      1:ord       0.7  1
   449      1:ord      1:ord       0.7  1
   450      1:ord      1:ord       0.8  1
   451      1:ord      1:ord       0.8  1
   452      1:ord      1:ord       0.7  1
   453      1:ord      1:ord       1  1
   454      1:ord      1:ord       0.7  1
   455      1:ord      1:ord       0.6  1
   456      1:ord      1:ord       1  1
   457      1:ord      1:ord       0.8  1
   458      1:ord      1:ord       0.9  1
   459      1:ord      1:ord       0.7  1
   460      1:ord      1:ord       0.9  1
   461      1:ord      1:ord       1  1
   462      1:ord      1:ord       0.9  1
   463      1:ord      1:ord       0.6  1
   464      1:ord      1:ord       1  1
   465      1:ord      1:ord       0.9  1
   466      1:ord      1:ord       1  1
   467      1:ord      1:ord       0.9  1
   468      1:ord      1:ord       0.8  1
   469      1:ord      1:ord       0.8  1
   470      1:ord      1:ord       0.9  1
   471      1:ord      1:ord       0.8  1
   472      1:ord      1:ord       1  1
   473      1:ord      1:ord       0.9  1
   474      1:ord      1:ord       0.9  1
   475      1:ord      1:ord       0.8  1
   476      1:ord      1:ord       0.8  1
   477      1:ord      1:ord       0.9  1
   478      1:ord      1:ord       0.9  1
   479      1:ord      1:ord       0.9  1
   480      1:ord      1:ord       0.8  1
   481      1:ord      1:ord       0.9  1
   482      1:ord      1:ord       1  1
   483      1:ord      1:ord       1  1
   484      1:ord      1:ord       0.7  1
   485      1:ord      1:ord       0.9  1
   486      1:ord      1:ord       0.6  1
   487      1:ord      1:ord       0.8  1
   488      1:ord      2:dis   +   0.6  1
   489      1:ord      1:ord       0.55  1
   490      1:ord      1:ord       0.5  1
   491      1:ord      1:ord       0.5  1
   492      1:ord      1:ord       0.6  1
   493      1:ord      2:dis   +   0.9  2
   494      1:ord      2:dis   +   0.7  2
   495      1:ord      2:dis   +   0.9  2
   496      1:ord      2:dis   +   0.9  2
   497      1:ord      2:dis   +   0.8  2
   498      1:ord      2:dis   +   0.767  2
   499      1:ord      2:dis   +   0.6  2
   500      1:ord      2:dis   +   0.8  2
   501      1:ord      2:dis   +   0.7  2
   502      1:ord      2:dis   +   0.6  2
   503      1:ord      2:dis   +   0.7  2
   504      1:ord      2:dis   +   0.8  2
   505      1:ord      2:dis   +   0.6  2
   506      1:ord      1:ord       0.567  2
   507      1:ord      2:dis   +   0.7  2
   508      1:ord      2:dis   +   0.7  2
   509      1:ord      2:dis   +   0.8  2
   510      1:ord      2:dis   +   0.9  2
   511      1:ord      2:dis   +   0.8  2
   512      1:ord      2:dis   +   0.8  2
   513      1:ord      2:dis   +   0.8  2
   514      1:ord      2:dis   +   0.7  2
   515      1:ord      2:dis   +   0.6  2
   516      1:ord      1:ord       0.5  2
   517      1:ord      1:ord       0.6  2
   518      1:ord      2:dis   +   0.7  2
   519      1:ord      2:dis   +   0.6  2
   520      1:ord      1:ord       0.5  2
   521      1:ord      1:ord       0.5  2
   522      1:ord      1:ord       0.8  2
   523      1:ord      2:dis   +   0.6  2
   524      1:ord      1:ord       0.7  1
   525      1:ord      1:ord       0.8  1
   526      1:ord      1:ord       0.6  1
   527      1:ord      1:ord       0.8  1
   528      1:ord      1:ord       0.8  1
   529      1:ord      1:ord       0.6  1
   530      1:ord      1:ord       0.8  1
   531      1:ord      1:ord       0.9  1
   532      1:ord      1:ord       0.7  1
   533      1:ord      1:ord       0.7  1
   534      1:ord      1:ord       0.8  1
   535      1:ord      1:ord       1  1
   536      1:ord      1:ord       1  1
   537      1:ord      1:ord       0.9  1
   538      1:ord      1:ord       0.7  1
   539      1:ord      1:ord       0.9  1
   540      1:ord      1:ord       1  1
   541      1:ord      1:ord       0.7  1
   542      1:ord      1:ord       0.9  1
   543      1:ord      1:ord       0.9  1
   544      1:ord      1:ord       0.9  1
   545      1:ord      1:ord       0.9  1
   546      1:ord      1:ord       0.9  1
   547      1:ord      1:ord       0.9  1
   548      1:ord      1:ord       0.9  1
   549      1:ord      1:ord       0.9  1
   550      1:ord      1:ord       0.7  1
   551      1:ord      1:ord       0.9  1
   552      1:ord      1:ord       0.9  1
   553      1:ord      1:ord       0.6  1
   554      1:ord      1:ord       0.9  1
   555      1:ord      1:ord       0.7  1
   556      1:ord      1:ord       0.9  1
   557      1:ord      1:ord       0.9  1
   558      1:ord      1:ord       0.6  1
   559      1:ord      1:ord       0.7  1
   560      1:ord      2:dis   +   0.7  1
   561      1:ord      1:ord       0.6  1
   562      1:ord      1:ord       0.6  1
   563      1:ord      1:ord       0.5  1
   564      1:ord      1:ord       0.8  1
   565      1:ord      1:ord       0.6  1
   566      1:ord      1:ord       0.6  1
   567      1:ord      2:dis   +   0.6  1
   568      1:ord      1:ord       0.6  1
   569      1:ord      1:ord       0.7  1
   570      1:ord      1:ord       0.9  1
   571      1:ord      1:ord       0.8  1
   572      1:ord      1:ord       0.9  1
   573      1:ord      1:ord       0.7  1
   574      1:ord      1:ord       0.9  1
   575      1:ord      1:ord       0.9  1
   576      1:ord      1:ord       0.9  1
   577      1:ord      1:ord       1  1
   578      1:ord      1:ord       0.9  1
   579      1:ord      1:ord       0.9  1
   580      1:ord      1:ord       0.7  1
   581      1:ord      1:ord       0.8  1
   582      1:ord      1:ord       0.8  1
   583      1:ord      1:ord       0.8  1
   584      1:ord      1:ord       0.8  1
   585      1:ord      1:ord       0.8  1
   586      1:ord      1:ord       0.8  1
   587      1:ord      1:ord       0.8  1
   588      1:ord      1:ord       0.9  1
   589      1:ord      1:ord       0.9  1
   590      1:ord      1:ord       1  1
   591      1:ord      1:ord       1  1
   592      1:ord      1:ord       0.6  1
   593      1:ord      1:ord       0.7  1
   594      1:ord      1:ord       0.7  1
   595      1:ord      1:ord       0.8  1
   596      1:ord      1:ord       0.7  1
   597      1:ord      1:ord       0.5  1
   598      1:ord      1:ord       0.8  1
   599      1:ord      2:dis   +   0.6  1
   600      1:ord      1:ord       0.5  1
   601      1:ord      1:ord       0.7  1
   602      1:ord      1:ord       0.5  1
   603      1:ord      1:ord       0.7  1
   604      1:ord      1:ord       0.8  1
   605      1:ord      1:ord       0.7  1
   606      1:ord      1:ord       0.5  1
   607      1:ord      1:ord       0.6  1
   608      1:ord      1:ord       0.6  1
   609      1:ord      1:ord       0.7  1
   610      1:ord      1:ord       0.9  1
   611      1:ord      1:ord       0.8  1
   612      1:ord      1:ord       0.7  1
   613      1:ord      1:ord       0.7  1
   614      1:ord      1:ord       0.6  1
   615      1:ord      1:ord       0.6  1
   616      1:ord      1:ord       0.6  1
   617      1:ord      1:ord       0.8  1
   618      1:ord      1:ord       0.9  1
   619      1:ord      1:ord       0.8  1
   620      1:ord      1:ord       0.8  1
   621      1:ord      1:ord       0.8  1
   622      1:ord      1:ord       0.6  1
   623      1:ord      1:ord       0.9  1
   624      1:ord      1:ord       0.9  1
   625      1:ord      1:ord       0.8  1
   626      1:ord      1:ord       0.9  1
   627      1:ord      1:ord       0.7  1
   628      1:ord      1:ord       0.6  1
   629      1:ord      1:ord       0.8  1
   630      1:ord      1:ord       0.6  1
   631      1:ord      1:ord       0.9  1
   632      1:ord      1:ord       1  1
   633      1:ord      1:ord       0.9  1
   634      1:ord      1:ord       0.7  1
   635      1:ord      1:ord       1  1
   636      1:ord      1:ord       0.8  1
   637      1:ord      1:ord       0.8  1
   638      1:ord      1:ord       0.9  1
   639      1:ord      1:ord       0.9  1
   640      1:ord      1:ord       0.9  1
   641      1:ord      1:ord       0.5  1
   642      1:ord      1:ord       0.8  1
   643      1:ord      1:ord       0.8  1
   644      1:ord      1:ord       0.6  1
   645      1:ord      1:ord       0.8  1
   646      1:ord      1:ord       0.7  1
   647      1:ord      1:ord       0.8  1
   648      1:ord      2:dis   +   0.6  1
   649      1:ord      1:ord       0.5  1
   650      1:ord      2:dis   +   0.7  1
   651      1:ord      2:dis   +   0.7  1
   652      1:ord      2:dis   +   0.7  1
   653      1:ord      1:ord       0.5  1
   654      1:ord      1:ord       0.6  1
   655      1:ord      2:dis   +   0.6  1
   656      1:ord      2:dis   +   0.7  1
   657      1:ord      1:ord       0.7  1
   658      1:ord      2:dis   +   0.6  1
   659      1:ord      2:dis   +   0.6  1
   660      1:ord      1:ord       0.5  1
   661      1:ord      1:ord       0.6  1
   662      1:ord      1:ord       0.6  1
   663      1:ord      1:ord       0.9  1
   664      1:ord      1:ord       1  1
   665      1:ord      1:ord       0.7  1
   666      1:ord      1:ord       0.7  1
   667      1:ord      1:ord       0.8  1
   668      1:ord      1:ord       0.8  1
   669      1:ord      1:ord       0.8  1
   670      1:ord      1:ord       0.8  1
   671      1:ord      1:ord       0.7  1
   672      1:ord      1:ord       0.8  1
   673      1:ord      1:ord       0.9  1
   674      1:ord      1:ord       0.9  1
   675      1:ord      1:ord       0.7  1
   676      1:ord      1:ord       0.7  1
   677      1:ord      1:ord       0.7  1
   678      1:ord      1:ord       1  1
   679      1:ord      1:ord       0.8  1
   680      1:ord      1:ord       0.8  1
   681      1:ord      1:ord       0.9  1
   682      1:ord      1:ord       0.8  1
   683      1:ord      1:ord       0.8  1
   684      1:ord      1:ord       0.8  1
   685      1:ord      1:ord       0.9  1
   686      1:ord      1:ord       0.9  1
   687      1:ord      1:ord       0.8  1
   688      1:ord      1:ord       0.7  1
   689      1:ord      1:ord       0.7  1
   690      1:ord      1:ord       1  1
   691      1:ord      1:ord       0.8  1
   692      1:ord      1:ord       1  1
   693      1:ord      1:ord       0.9  1
   694      1:ord      1:ord       0.9  1
   695      1:ord      1:ord       0.7  1
   696      1:ord      1:ord       0.8  1
   697      1:ord      1:ord       0.7  1
   698      1:ord      1:ord       0.8  1
   699      1:ord      1:ord       0.5  1
   700      1:ord      1:ord       0.6  1
   701      1:ord      1:ord       0.8  1
   702      1:ord      1:ord       0.5  1
   703      1:ord      2:dis   +   0.6  1
   704      1:ord      1:ord       0.5  1
   705      1:ord      1:ord       0.9  1
   706      1:ord      1:ord       0.5  1
   707      1:ord      1:ord       0.7  1
   708      1:ord      1:ord       0.6  1
   709      1:ord      1:ord       0.6  1
   710      1:ord      2:dis   +   0.8  1
   711      1:ord      1:ord       0.7  1
   712      1:ord      1:ord       0.8  1
   713      1:ord      1:ord       0.7  1
   714      1:ord      1:ord       0.8  1
   715      1:ord      1:ord       0.9  1
   716      1:ord      1:ord       0.8  1
   717      1:ord      1:ord       0.8  1
   718      1:ord      1:ord       0.9  1
   719      1:ord      1:ord       0.7  1
   720      1:ord      1:ord       0.7  1
   721      1:ord      1:ord       0.9  1
   722      1:ord      1:ord       0.7  1
   723      1:ord      1:ord       0.9  1
   724      1:ord      1:ord       0.8  1
   725      1:ord      1:ord       0.5  1
   726      1:ord      1:ord       0.9  1
   727      1:ord      1:ord       0.7  1
   728      1:ord      1:ord       0.9  1
   729      1:ord      1:ord       0.9  1
   730      1:ord      1:ord       1  1
   731      1:ord      1:ord       0.5  1
   732      1:ord      1:ord       0.9  1
   733      1:ord      1:ord       0.7  1
   734      1:ord      1:ord       0.8  1
   735      1:ord      1:ord       0.9  1
   736      1:ord      1:ord       0.8  1
   737      1:ord      1:ord       0.9  1
   738      1:ord      1:ord       0.7  1
   739      1:ord      1:ord       0.8  1
   740      1:ord      1:ord       0.9  1
   741      1:ord      1:ord       0.8  1
   742      1:ord      1:ord       0.6  1
   743      1:ord      1:ord       0.7  1
   744      1:ord      1:ord       0.5  1
   745      1:ord      2:dis   +   0.8  1
   746      1:ord      2:dis   +   0.55  1
   747      1:ord      2:dis   +   0.6  1
   748      1:ord      1:ord       0.5  1
   749      1:ord      2:dis   +   0.8  1
   750      1:ord      2:dis   +   0.6  1
   751      1:ord      1:ord       0.7  1
   752      1:ord      2:dis   +   0.6  1
   753      1:ord      1:ord       0.6  1
   754      1:ord      1:ord       0.6  1
   755      1:ord      1:ord       0.9  1
   756      1:ord      2:dis   +   0.9  1
   757      1:ord      1:ord       0.7  1
   758      1:ord      1:ord       0.6  1
   759      1:ord      1:ord       0.9  1
   760      1:ord      1:ord       0.9  1
   761      1:ord      1:ord       0.7  1
   762      1:ord      1:ord       1  1
   763      1:ord      1:ord       0.9  1
   764      1:ord      1:ord       1  1
   765      1:ord      1:ord       0.8  1
   766      1:ord      1:ord       0.8  1
   767      1:ord      1:ord       0.9  1
   768      1:ord      1:ord       0.9  1
   769      1:ord      1:ord       0.8  1
   770      1:ord      1:ord       1  1
   771      1:ord      1:ord       0.9  1
   772      1:ord      1:ord       1  1
   773      1:ord      1:ord       0.8  1
   774      1:ord      1:ord       0.9  1
   775      1:ord      1:ord       0.8  1
   776      1:ord      1:ord       1  1
   777      1:ord      1:ord       0.7  1
   778      1:ord      1:ord       0.7  1
   779      1:ord      1:ord       0.8  1
   780      1:ord      1:ord       0.7  1
   781      1:ord      1:ord       1  1
   782      1:ord      1:ord       0.7  1
   783      1:ord      1:ord       0.7  1
   784      1:ord      1:ord       0.8  1
   785      1:ord      1:ord       0.5  1
   786      1:ord      1:ord       0.8  1
   787      1:ord      2:dis   +   0.6  1
   788      1:ord      1:ord       0.9  1
   789      1:ord      1:ord       0.9  1
   790      1:ord      1:ord       0.9  1
   791      1:ord      1:ord       0.8  1
   792      1:ord      1:ord       0.8  1
   793      1:ord      1:ord       0.5  1
   794      1:ord      1:ord       0.8  1
   795      1:ord      1:ord       0.8  1
   796      1:ord      1:ord       0.7  1
   797      1:ord      1:ord       0.7  1
   798      1:ord      1:ord       0.7  1
   799      1:ord      1:ord       1  1
   800      1:ord      1:ord       0.6  1
   801      1:ord      1:ord       0.6  1
   802      1:ord      2:dis   +   0.6  1
   803      1:ord      1:ord       0.9  1
   804      1:ord      1:ord       0.5  1
   805      1:ord      1:ord       0.8  1
   806      1:ord      1:ord       0.8  1
   807      1:ord      1:ord       0.9  1
   808      1:ord      1:ord       0.9  1
   809      1:ord      1:ord       1  1
   810      1:ord      1:ord       0.8  1
   811      1:ord      1:ord       1  1
   812      1:ord      1:ord       0.9  1
   813      1:ord      1:ord       0.6  1
   814      1:ord      1:ord       0.9  1
   815      1:ord      1:ord       0.9  1
   816      2:dis      1:ord   +   0.5  1
   817      2:dis      2:dis       0.8  2
   818      2:dis      1:ord   +   0.6  1
   819      2:dis      1:ord   +   1  1
   820      2:dis      2:dis       0.6  2
   821      2:dis      1:ord   +   0.5  1
   822      2:dis      1:ord   +   0.6  1
   823      2:dis      1:ord   +   0.55  1
   824      2:dis      1:ord   +   0.7  1
   825      2:dis      2:dis       0.7  1
   826      2:dis      1:ord   +   0.5  1
   827      2:dis      2:dis       0.6  1
   828      2:dis      1:ord   +   0.7  1
   829      2:dis      1:ord   +   0.6  1
   830      2:dis      1:ord   +   0.5  1
   831      2:dis      2:dis       0.6  1
   832      2:dis      1:ord   +   0.6  1
   833      2:dis      1:ord   +   0.5  1
   834      2:dis      1:ord   +   0.7  1
   835      2:dis      1:ord   +   0.5  1
   836      2:dis      2:dis       0.9  1
   837      2:dis      1:ord   +   0.6  1
   838      2:dis      1:ord   +   0.6  1
   839      2:dis      2:dis       0.8  1
   840      2:dis      2:dis       0.6  1
   841      2:dis      1:ord   +   0.6  1
   842      2:dis      1:ord   +   0.6  1
   843      2:dis      1:ord   +   0.5  1
   844      2:dis      2:dis       0.7  1
   845      2:dis      1:ord   +   0.5  1
   846      2:dis      2:dis       0.7  1
   847      2:dis      1:ord   +   0.6  1
   848      2:dis      1:ord   +   0.5  1
   849      2:dis      2:dis       0.8  1
   850      2:dis      2:dis       0.7  1
   851      2:dis      2:dis       0.6  1
   852      2:dis      2:dis       0.6  1
   853      2:dis      1:ord   +   0.6  1
   854      2:dis      2:dis       0.7  1
   855      2:dis      1:ord   +   0.6  1
   856      2:dis      1:ord   +   0.5  1
   857      2:dis      1:ord   +   0.6  1
   858      2:dis      1:ord   +   0.5  1
   859      2:dis      2:dis       0.7  1
   860      2:dis      1:ord   +   0.7  1
   861      2:dis      2:dis       0.6  1
   862      2:dis      1:ord   +   0.7  1
   863      2:dis      2:dis       0.7  1
   864      2:dis      1:ord   +   0.6  1
   865      2:dis      1:ord   +   0.6  1
   866      2:dis      2:dis       0.6  1
   867      2:dis      1:ord   +   0.6  1
   868      2:dis      1:ord   +   0.8  1
   869      2:dis      1:ord   +   0.7  1
   870      2:dis      1:ord   +   0.5  1
   871      2:dis      1:ord   +   0.5  1
   872      2:dis      1:ord   +   0.7  1
   873      2:dis      1:ord   +   0.5  1
   874      2:dis      1:ord   +   0.8  1
   875      2:dis      1:ord   +   0.8  1
   876      2:dis      2:dis       0.6  1
   877      2:dis      1:ord   +   0.5  1
   878      2:dis      2:dis       0.6  1
   879      2:dis      2:dis       0.7  1
   880      2:dis      1:ord   +   0.7  1
   881      2:dis      1:ord   +   0.6  1
   882      2:dis      1:ord   +   0.5  1
   883      2:dis      1:ord   +   0.5  1
   884      2:dis      1:ord   +   0.5  1
   885      2:dis      2:dis       0.8  1
   886      2:dis      2:dis       0.6  1
   887      2:dis      1:ord   +   0.5  1
   888      2:dis      2:dis       0.8  1
   889      2:dis      1:ord   +   0.7  1
   890      2:dis      1:ord   +   0.5  1
   891      2:dis      1:ord   +   0.8  1
   892      2:dis      1:ord   +   0.7  1
   893      2:dis      1:ord   +   0.9  1
   894      2:dis      1:ord   +   0.7  1
   895      2:dis      1:ord   +   0.5  1
   896      2:dis      1:ord   +   0.7  1
   897      2:dis      1:ord   +   0.6  1
   898      2:dis      2:dis       0.7  1
   899      2:dis      1:ord   +   0.6  1
   900      2:dis      2:dis       0.6  1
   901      2:dis      1:ord   +   0.7  1
   902      2:dis      1:ord   +   0.8  1
   903      2:dis      1:ord   +   0.7  1
   904      2:dis      1:ord   +   0.5  1
   905      2:dis      2:dis       0.6  1
   906      2:dis      1:ord   +   0.5  1
   907      2:dis      1:ord   +   0.6  1
   908      2:dis      2:dis       0.7  1
   909      2:dis      2:dis       0.6  1
   910      2:dis      1:ord   +   0.6  1
   911      2:dis      1:ord   +   0.5  1
   912      2:dis      2:dis       0.7  2
   913      2:dis      2:dis       0.6  2
   914      2:dis      2:dis       0.8  2
   915      2:dis      2:dis       0.7  2
   916      2:dis      2:dis       0.7  2
   917      2:dis      2:dis       0.8  2
   918      2:dis      1:ord   +   0.5  1
   919      2:dis      1:ord   +   0.7  1
   920      2:dis      1:ord   +   0.6  1
   921      2:dis      1:ord   +   0.7  1
   922      2:dis      1:ord   +   0.7  1
   923      2:dis      1:ord   +   0.6  1
   924      2:dis      2:dis       0.6  1
   925      2:dis      2:dis       0.7  1
   926      2:dis      1:ord   +   0.6  1
   927      2:dis      2:dis       0.7  1
   928      2:dis      2:dis       0.6  1
   929      2:dis      1:ord   +   0.5  1
   930      2:dis      2:dis       0.6  1
   931      2:dis      1:ord   +   0.5  1
   932      2:dis      1:ord   +   0.7  1
   933      2:dis      1:ord   +   0.5  1
   934      2:dis      1:ord   +   0.6  1
   935      2:dis      1:ord   +   0.6  1
   936      2:dis      2:dis       0.7  1
   937      2:dis      1:ord   +   0.6  1
   938      2:dis      1:ord   +   0.6  1
   939      2:dis      1:ord   +   0.8  1
   940      2:dis      2:dis       0.6  1
   941      2:dis      2:dis       0.7  1
   942      2:dis      1:ord   +   0.6  1
   943      2:dis      2:dis       0.6  1
   944      2:dis      2:dis       0.6  1
   945      2:dis      2:dis       0.7  1
   946      2:dis      2:dis       0.7  1
   947      1:ord      1:ord       0.5  1
   948      1:ord      2:dis   +   0.6  2
   949      1:ord      2:dis   +   0.7  2
   950      1:ord      2:dis   +   0.8  2
   951      1:ord      2:dis   +   0.6  2
   952      1:ord      2:dis   +   0.7  2
   953      1:ord      2:dis   +   0.7  2
   954      1:ord      2:dis   +   0.6  2
   955      1:ord      2:dis   +   0.8  2
   956      1:ord      2:dis   +   0.6  2
   957      1:ord      1:ord       0.5  2
   958      1:ord      1:ord       0.7  2
   959      1:ord      1:ord       0.7  2
   960      1:ord      2:dis   +   0.6  2
   961      1:ord      1:ord       0.8  1
   962      1:ord      1:ord       0.6  1
   963      1:ord      1:ord       0.5  1
   964      1:ord      1:ord       0.7  1
   965      1:ord      1:ord       0.8  1
   966      1:ord      1:ord       0.6  1
   967      1:ord      1:ord       0.5  1
   968      1:ord      1:ord       0.7  1
   969      1:ord      1:ord       0.5  1
   970      1:ord      1:ord       0.7  1
   971      1:ord      1:ord       0.7  1
   972      1:ord      1:ord       0.7  1
   973      1:ord      1:ord       0.9  1
   974      1:ord      1:ord       0.7  1
   975      1:ord      1:ord       0.5  1
   976      1:ord      1:ord       0.7  1
   977      1:ord      1:ord       0.7  1
   978      1:ord      1:ord       0.8  1
   979      1:ord      1:ord       0.7  1
   980      1:ord      1:ord       0.6  1
   981      1:ord      1:ord       0.8  1
   982      1:ord      1:ord       0.8  1
   983      1:ord      1:ord       0.6  1
   984      1:ord      1:ord       0.7  1
   985      1:ord      1:ord       0.5  1
   986      1:ord      1:ord       0.5  1
   987      1:ord      1:ord       0.5  1
   988      1:ord      1:ord       0.7  1
   989      1:ord      1:ord       0.8  1
   990      1:ord      1:ord       0.8  1
   991      1:ord      1:ord       0.9  1
   992      1:ord      1:ord       0.6  1
   993      1:ord      1:ord       0.9  1
   994      1:ord      1:ord       0.7  1
   995      1:ord      1:ord       0.6  1
   996      1:ord      1:ord       0.6  1
   997      1:ord      1:ord       0.5  1
   998      1:ord      1:ord       0.5  1
   999      1:ord      1:ord       0.8  1
  1000      1:ord      1:ord       0.8  1
  1001      1:ord      1:ord       0.9  1
  1002      1:ord      1:ord       0.8  1
  1003      1:ord      1:ord       0.6  1
  1004      1:ord      2:dis   +   0.8  1
  1005      1:ord      1:ord       0.5  1
  1006      1:ord      1:ord       0.7  1
  1007      1:ord      1:ord       0.6  1
  1008      1:ord      1:ord       1  1
  1009      1:ord      1:ord       0.9  1
  1010      1:ord      1:ord       0.5  1
  1011      1:ord      2:dis   +   0.6  1
  1012      1:ord      1:ord       0.6  1
  1013      1:ord      1:ord       0.8  1
  1014      1:ord      2:dis   +   0.6  1
  1015      1:ord      1:ord       0.5  1
  1016      1:ord      1:ord       0.6  1
  1017      1:ord      1:ord       0.8  1
  1018      1:ord      1:ord       0.7  1
  1019      1:ord      1:ord       0.6  1
  1020      1:ord      1:ord       0.7  1
  1021      1:ord      1:ord       0.7  1
  1022      1:ord      2:dis   +   0.6  1
  1023      1:ord      1:ord       0.7  1
  1024      1:ord      1:ord       0.7  1
  1025      1:ord      1:ord       0.9  1
  1026      1:ord      1:ord       0.8  1
  1027      1:ord      1:ord       0.8  1
  1028      1:ord      1:ord       0.8  1
  1029      1:ord      1:ord       0.6  1
  1030      1:ord      1:ord       0.7  1
  1031      1:ord      1:ord       0.7  1
  1032      1:ord      1:ord       0.8  1
  1033      1:ord      1:ord       0.6  1
  1034      1:ord      1:ord       0.7  1
  1035      1:ord      1:ord       0.8  1
  1036      1:ord      1:ord       0.7  1
  1037      1:ord      1:ord       0.8  1
  1038      1:ord      2:dis   +   0.7  1
  1039      1:ord      1:ord       0.5  1
  1040      1:ord      1:ord       0.6  1
  1041      1:ord      1:ord       0.6  1
  1042      1:ord      1:ord       0.6  1
  1043      1:ord      1:ord       0.6  1
  1044      1:ord      2:dis   +   0.7  1
  1045      1:ord      1:ord       0.5  1
  1046      1:ord      1:ord       0.6  1
  1047      1:ord      1:ord       0.7  1
  1048      1:ord      1:ord       0.8  1
  1049      1:ord      1:ord       0.5  1
  1050      1:ord      1:ord       0.9  1
  1051      1:ord      1:ord       0.9  1
  1052      1:ord      1:ord       0.7  1
  1053      1:ord      1:ord       0.5  1
  1054      1:ord      1:ord       0.7  1
  1055      1:ord      1:ord       0.7  1
  1056      1:ord      1:ord       0.7  1
  1057      1:ord      1:ord       0.7  1
  1058      1:ord      1:ord       0.9  1
  1059      1:ord      1:ord       0.7  1
  1060      1:ord      1:ord       0.6  1
  1061      1:ord      1:ord       0.6  1
  1062      1:ord      1:ord       0.6  1
  1063      1:ord      2:dis   +   0.6  1
  1064      1:ord      1:ord       0.7  1
  1065      1:ord      1:ord       0.7  1
  1066      1:ord      1:ord       0.8  1
  1067      1:ord      2:dis   +   0.7  1
  1068      1:ord      1:ord       0.7  1
  1069      1:ord      1:ord       0.6  1
  1070      1:ord      1:ord       0.6  1
  1071      1:ord      1:ord       0.8  1
  1072      1:ord      1:ord       0.7  1
  1073      1:ord      1:ord       0.7  1
  1074      1:ord      1:ord       0.5  1
  1075      1:ord      1:ord       0.7  1
  1076      1:ord      1:ord       0.6  1
  1077      1:ord      1:ord       0.7  1
  1078      1:ord      1:ord       0.7  1
  1079      1:ord      1:ord       0.8  1
  1080      1:ord      1:ord       0.7  1
  1081      1:ord      1:ord       0.8  1
  1082      1:ord      1:ord       0.6  1
  1083      1:ord      1:ord       0.5  1
  1084      1:ord      1:ord       0.7  1
  1085      1:ord      1:ord       0.9  1
  1086      1:ord      1:ord       0.8  1
  1087      1:ord      1:ord       0.5  1
  1088      1:ord      1:ord       0.5  1
  1089      1:ord      1:ord       0.6  1
  1090      1:ord      2:dis   +   1  1
  1091      1:ord      2:dis   +   0.9  1
  1092      1:ord      2:dis   +   0.7  1
  1093      1:ord      1:ord       0.6  1
  1094      1:ord      1:ord       0.9  1
  1095      1:ord      1:ord       0.8  1
  1096      1:ord      1:ord       0.8  1
  1097      1:ord      1:ord       0.9  1
  1098      1:ord      2:dis   +   0.6  1
  1099      1:ord      1:ord       0.9  1
  1100      1:ord      2:dis   +   0.6  1
  1101      1:ord      2:dis   +   0.6  1
  1102      1:ord      1:ord       0.5  1
  1103      1:ord      2:dis   +   0.7  1
  1104      1:ord      2:dis   +   0.7  1
  1105      1:ord      2:dis   +   0.7  1
  1106      1:ord      1:ord       0.6  1
  1107      1:ord      2:dis   +   0.8  1
  1108      1:ord      1:ord       0.5  1
  1109      1:ord      1:ord       0.5  1
  1110      1:ord      1:ord       0.6  1
  1111      1:ord      1:ord       0.8  1
  1112      1:ord      1:ord       0.7  1
  1113      1:ord      2:dis   +   0.6  1
  1114      1:ord      2:dis   +   0.6  1
  1115      1:ord      2:dis   +   0.7  1
  1116      1:ord      1:ord       0.7  1
  1117      1:ord      2:dis   +   0.6  1
  1118      1:ord      1:ord       0.6  1
  1119      1:ord      1:ord       0.8  1
  1120      1:ord      1:ord       1  1
  1121      1:ord      1:ord       0.8  1
  1122      1:ord      2:dis   +   0.6  1
  1123      1:ord      2:dis   +   0.7  1
  1124      1:ord      1:ord       0.5  1
  1125      1:ord      1:ord       0.9  1
  1126      1:ord      1:ord       0.7  1
  1127      1:ord      1:ord       0.7  1
  1128      1:ord      1:ord       0.8  1
  1129      1:ord      1:ord       0.8  1
  1130      1:ord      1:ord       0.8  1
  1131      1:ord      1:ord       0.9  1
  1132      1:ord      1:ord       0.8  1
  1133      1:ord      1:ord       0.8  1
  1134      1:ord      1:ord       0.6  1
  1135      1:ord      1:ord       0.9  1
  1136      1:ord      1:ord       0.9  1
  1137      1:ord      1:ord       0.9  1
  1138      1:ord      1:ord       0.8  1
  1139      1:ord      1:ord       0.9  1
  1140      1:ord      1:ord       0.9  1
  1141      1:ord      2:dis   +   0.6  1
  1142      1:ord      1:ord       0.7  1
  1143      1:ord      1:ord       0.9  1
  1144      1:ord      1:ord       0.9  1
  1145      1:ord      2:dis   +   0.7  1
  1146      1:ord      2:dis   +   0.8  1
  1147      1:ord      2:dis   +   0.8  1
  1148      1:ord      1:ord       0.5  1
  1149      1:ord      2:dis   +   0.7  1
  1150      1:ord      1:ord       0.5  1
  1151      1:ord      1:ord       0.5  1
  1152      1:ord      1:ord       1  1
  1153      1:ord      1:ord       0.8  1
  1154      1:ord      1:ord       0.5  1
  1155      1:ord      1:ord       0.9  1
  1156      1:ord      1:ord       0.7  1
  1157      1:ord      1:ord       0.8  1
  1158      1:ord      1:ord       0.8  1
  1159      1:ord      1:ord       0.9  1
  1160      1:ord      1:ord       0.7  1
  1161      1:ord      1:ord       0.9  1
  1162      1:ord      1:ord       0.8  1
  1163      1:ord      1:ord       1  1
  1164      1:ord      1:ord       0.7  1
  1165      1:ord      1:ord       0.9  1
  1166      1:ord      1:ord       0.7  1
  1167      1:ord      1:ord       0.9  1
  1168      1:ord      1:ord       0.6  1
  1169      1:ord      1:ord       1  1
  1170      1:ord      1:ord       0.9  1
  1171      1:ord      1:ord       0.6  1
  1172      1:ord      1:ord       0.7  1
  1173      1:ord      2:dis   +   0.7  1
  1174      1:ord      2:dis   +   0.7  2
  1175      1:ord      2:dis   +   0.6  2
  1176      1:ord      2:dis   +   0.8  2
  1177      1:ord      2:dis   +   0.8  2
  1178      1:ord      2:dis   +   0.8  2
  1179      1:ord      2:dis   +   0.8  2
  1180      1:ord      2:dis   +   0.8  2
  1181      1:ord      2:dis   +   0.7  2
  1182      1:ord      2:dis   +   0.8  2
  1183      1:ord      2:dis   +   0.7  2
  1184      1:ord      2:dis   +   0.8  2
  1185      1:ord      2:dis   +   0.65  2
  1186      1:ord      2:dis   +   0.8  2
  1187      1:ord      2:dis   +   0.7  2
  1188      1:ord      2:dis   +   0.8  2
  1189      1:ord      2:dis   +   0.9  2
  1190      1:ord      2:dis   +   0.8  2
  1191      1:ord      2:dis   +   0.8  2
  1192      2:dis      2:dis       0.8  2
  1193      2:dis      2:dis       0.7  2
  1194      2:dis      2:dis       0.8  2
  1195      2:dis      2:dis       0.6  2
  1196      2:dis      2:dis       0.7  2
  1197      2:dis      1:ord   +   0.7  2
  1198      2:dis      2:dis       0.8  2
  1199      2:dis      1:ord   +   0.6  2
  1200      2:dis      1:ord   +   0.7  2
  1201      2:dis      2:dis       0.8  2
  1202      2:dis      1:ord   +   0.6  1
  1203      2:dis      1:ord   +   0.5  1
  1204      2:dis      1:ord   +   0.8  1
  1205      2:dis      1:ord   +   0.5  1
  1206      2:dis      1:ord   +   0.5  1
  1207      2:dis      1:ord   +   0.7  1
  1208      2:dis      1:ord   +   0.6  1
  1209      2:dis      1:ord   +   0.7  1
  1210      2:dis      1:ord   +   0.8  1
  1211      2:dis      2:dis       0.7  1
  1212      2:dis      1:ord   +   0.9  1
  1213      2:dis      1:ord   +   0.5  1
  1214      2:dis      1:ord   +   0.6  1
  1215      2:dis      1:ord   +   0.8  1
  1216      2:dis      2:dis       0.7  1
  1217      2:dis      1:ord   +   0.9  1
  1218      2:dis      1:ord   +   0.8  1
  1219      2:dis      1:ord   +   0.5  1
  1220      2:dis      1:ord   +   0.7  1
  1221      2:dis      1:ord   +   0.7  1
  1222      2:dis      1:ord   +   0.8  1
  1223      2:dis      1:ord   +   0.8  1
  1224      2:dis      1:ord   +   0.6  1
  1225      2:dis      1:ord   +   0.5  1
  1226      2:dis      1:ord   +   0.6  1
  1227      2:dis      1:ord   +   0.9  1
  1228      2:dis      1:ord   +   0.8  1
  1229      2:dis      1:ord   +   0.6  1
  1230      2:dis      1:ord   +   0.9  1
  1231      2:dis      1:ord   +   0.5  1
  1232      2:dis      1:ord   +   0.6  1
  1233      2:dis      1:ord   +   0.6  1
  1234      2:dis      1:ord   +   0.9  1
  1235      2:dis      1:ord   +   0.6  1
  1236      2:dis      1:ord   +   0.7  1
  1237      2:dis      1:ord   +   0.7  1
  1238      2:dis      1:ord   +   0.9  1
  1239      2:dis      1:ord   +   0.9  1
  1240      2:dis      1:ord   +   0.9  1
  1241      2:dis      1:ord   +   0.6  1
  1242      2:dis      1:ord   +   0.6  1
  1243      2:dis      1:ord   +   0.8  1
  1244      2:dis      1:ord   +   0.9  1
  1245      2:dis      1:ord   +   0.6  1
  1246      2:dis      1:ord   +   0.7  1
  1247      2:dis      1:ord   +   0.9  1
  1248      2:dis      1:ord   +   0.8  1
  1249      2:dis      1:ord   +   0.5  1
  1250      2:dis      1:ord   +   0.7  1
  1251      2:dis      2:dis       0.6  1
  1252      2:dis      1:ord   +   0.6  1
  1253      2:dis      1:ord   +   0.6  1
  1254      2:dis      1:ord   +   0.6  1
  1255      2:dis      1:ord   +   0.6  1
  1256      2:dis      1:ord   +   0.7  1
  1257      2:dis      1:ord   +   0.7  1
  1258      2:dis      1:ord   +   0.8  1
  1259      2:dis      1:ord   +   0.8  1
  1260      2:dis      1:ord   +   0.6  1
  1261      2:dis      1:ord   +   1  1
  1262      2:dis      1:ord   +   0.6  1
  1263      2:dis      1:ord   +   0.5  1
  1264      2:dis      1:ord   +   0.5  1
  1265      2:dis      2:dis       0.6  1
  1266      2:dis      1:ord   +   0.5  1
  1267      2:dis      1:ord   +   0.6  1
  1268      2:dis      1:ord   +   0.6  1
  1269      2:dis      2:dis       0.7  1
  1270      2:dis      1:ord   +   0.8  1
  1271      2:dis      1:ord   +   0.7  1
  1272      2:dis      1:ord   +   0.7  1
  1273      2:dis      1:ord   +   0.65  1
  1274      2:dis      1:ord   +   0.8  1
  1275      2:dis      1:ord   +   0.6  1
  1276      2:dis      1:ord   +   0.7  1
  1277      2:dis      1:ord   +   0.7  1
  1278      2:dis      1:ord   +   0.6  1
  1279      2:dis      1:ord   +   0.7  1
  1280      2:dis      2:dis       0.6  1
  1281      2:dis      1:ord   +   0.8  1
  1282      2:dis      1:ord   +   0.9  1
  1283      2:dis      1:ord   +   0.7  1
  1284      2:dis      1:ord   +   0.7  1
  1285      2:dis      1:ord   +   0.5  1
  1286      2:dis      1:ord   +   0.8  1
  1287      2:dis      1:ord   +   0.5  1
  1288      2:dis      2:dis       0.6  1
  1289      2:dis      1:ord   +   0.5  1
  1290      2:dis      1:ord   +   0.6  1
  1291      2:dis      1:ord   +   0.8  1
  1292      2:dis      1:ord   +   0.8  1
  1293      2:dis      1:ord   +   0.5  1
  1294      2:dis      1:ord   +   0.7  1
  1295      2:dis      1:ord   +   0.6  1
  1296      2:dis      1:ord   +   0.6  1
  1297      2:dis      1:ord   +   0.5  1
  1298      2:dis      1:ord   +   0.6  1
  1299      2:dis      1:ord   +   0.6  1
  1300      2:dis      1:ord   +   0.8  1
  1301      2:dis      1:ord   +   0.6  1
  1302      2:dis      1:ord   +   0.5  1
  1303      2:dis      1:ord   +   0.8  1
  1304      2:dis      1:ord   +   0.9  1
  1305      2:dis      1:ord   +   0.5  1
  1306      2:dis      1:ord   +   0.5  1
  1307      2:dis      1:ord   +   0.5  1
  1308      2:dis      1:ord   +   0.6  1
  1309      2:dis      2:dis       0.7  1
  1310      2:dis      1:ord   +   0.6  1
  1311      2:dis      2:dis       0.8  1
  1312      2:dis      1:ord   +   0.7  1
  1313      2:dis      2:dis       0.6  1
  1314      2:dis      2:dis       0.6  1
  1315      2:dis      1:ord   +   0.6  1
  1316      2:dis      1:ord   +   0.6  1
  1317      2:dis      1:ord   +   0.7  1
  1318      2:dis      1:ord   +   0.5  1
  1319      2:dis      1:ord   +   0.8  1
  1320      2:dis      1:ord   +   0.6  1
  1321      1:ord      1:ord       0.5  1
  1322      1:ord      1:ord       0.5  1
  1323      1:ord      1:ord       0.6  1
  1324      1:ord      2:dis   +   0.6  1
  1325      1:ord      1:ord       0.5  1
  1326      1:ord      2:dis   +   0.6  1
  1327      1:ord      2:dis   +   0.7  1
  1328      1:ord      1:ord       0.7  1
  1329      1:ord      1:ord       0.5  1
  1330      1:ord      1:ord       0.5  1
  1331      1:ord      2:dis   +   0.6  1
  1332      1:ord      1:ord       0.5  1
  1333      1:ord      2:dis   +   0.7  1
  1334      1:ord      2:dis   +   0.7  1
  1335      1:ord      1:ord       0.567  1
  1336      1:ord      1:ord       0.6  1
  1337      1:ord      2:dis   +   0.8  1
  1338      1:ord      2:dis   +   0.9  1
  1339      1:ord      2:dis   +   0.7  1
  1340      1:ord      1:ord       0.5  1
  1341      1:ord      2:dis   +   0.6  1
  1342      1:ord      2:dis   +   0.6  1
  1343      1:ord      2:dis   +   1  1
  1344      1:ord      1:ord       0.6  1
  1345      1:ord      1:ord       0.5  1
  1346      1:ord      2:dis   +   0.8  2
  1347      1:ord      2:dis   +   0.7  2
  1348      1:ord      2:dis   +   0.7  2
  1349      1:ord      2:dis   +   1  2
  1350      1:ord      2:dis   +   0.667  2
  1351      1:ord      1:ord       0.5  2
  1352      1:ord      2:dis   +   0.7  2
  1353      1:ord      2:dis   +   0.7  2
  1354      1:ord      1:ord       0.8  2
  1355      1:ord      2:dis   +   0.7  2
  1356      1:ord      2:dis   +   0.8  2
  1357      1:ord      1:ord       0.6  1
  1358      1:ord      1:ord       0.6  1
  1359      1:ord      1:ord       0.6  1
  1360      1:ord      1:ord       0.7  1
  1361      1:ord      1:ord       0.8  1
  1362      1:ord      1:ord       0.5  1
  1363      1:ord      2:dis   +   0.6  1
  1364      1:ord      1:ord       0.5  1
  1365      1:ord      1:ord       0.5  1
  1366      1:ord      1:ord       0.7  1
  1367      1:ord      1:ord       0.6  1
  1368      1:ord      1:ord       0.7  1
  1369      1:ord      2:dis   +   0.6  1
  1370      1:ord      1:ord       0.5  1
  1371      1:ord      1:ord       0.5  1
  1372      1:ord      1:ord       0.5  1
  1373      1:ord      1:ord       0.7  1
  1374      1:ord      1:ord       0.6  1
  1375      1:ord      1:ord       0.6  1
  1376      1:ord      1:ord       0.6  1
  1377      1:ord      1:ord       0.5  1
  1378      1:ord      1:ord       0.8  1
  1379      1:ord      1:ord       0.6  1
  1380      1:ord      1:ord       0.9  1
  1381      1:ord      1:ord       0.9  1
  1382      1:ord      1:ord       0.6  1
  1383      1:ord      1:ord       0.9  1
  1384      1:ord      1:ord       0.7  1
  1385      1:ord      1:ord       0.6  1
  1386      1:ord      1:ord       0.8  1
  1387      1:ord      1:ord       0.6  1
  1388      1:ord      1:ord       0.6  1
  1389      1:ord      1:ord       0.7  1
  1390      1:ord      1:ord       0.7  1
  1391      1:ord      1:ord       0.6  1
  1392      1:ord      1:ord       0.8  1
  1393      1:ord      1:ord       0.6  1
  1394      1:ord      1:ord       0.7  1
  1395      1:ord      1:ord       0.8  1
  1396      1:ord      1:ord       0.8  1
  1397      1:ord      2:dis   +   0.6  1
  1398      1:ord      1:ord       0.7  1
  1399      1:ord      1:ord       0.6  1
  1400      1:ord      1:ord       0.8  1
  1401      1:ord      1:ord       0.6  1
  1402      1:ord      1:ord       0.6  1
  1403      1:ord      1:ord       0.6  1
  1404      1:ord      1:ord       0.8  1
  1405      1:ord      2:dis   +   0.6  1
  1406      1:ord      2:dis   +   0.6  1
  1407      1:ord      1:ord       0.6  1
  1408      1:ord      1:ord       0.6  1
  1409      1:ord      1:ord       0.7  1
  1410      1:ord      1:ord       0.9  1
  1411      1:ord      1:ord       0.9  1
  1412      1:ord      1:ord       0.7  1
  1413      1:ord      1:ord       0.8  1
  1414      1:ord      1:ord       0.8  1
  1415      1:ord      1:ord       0.7  1
  1416      1:ord      1:ord       0.8  1
  1417      1:ord      1:ord       0.7  1
  1418      1:ord      1:ord       0.8  1
  1419      1:ord      1:ord       0.8  1
  1420      1:ord      1:ord       0.8  1
  1421      1:ord      1:ord       0.6  1
  1422      1:ord      1:ord       0.9  1
  1423      1:ord      1:ord       0.8  1
  1424      1:ord      2:dis   +   0.6  1
  1425      1:ord      1:ord       0.9  1
  1426      1:ord      1:ord       0.9  1
  1427      1:ord      1:ord       0.8  1
  1428      1:ord      1:ord       0.7  1
  1429      1:ord      1:ord       0.9  1
  1430      1:ord      1:ord       0.8  1
  1431      1:ord      1:ord       0.9  1
  1432      1:ord      1:ord       1  1
  1433      1:ord      1:ord       0.9  1
  1434      1:ord      1:ord       1  1
  1435      1:ord      1:ord       0.6  1
  1436      1:ord      1:ord       0.6  1
  1437      1:ord      1:ord       0.5  1
  1438      1:ord      1:ord       0.9  1
  1439      1:ord      1:ord       1  1
  1440      1:ord      1:ord       0.8  1
  1441      1:ord      1:ord       0.5  1
  1442      1:ord      1:ord       0.5  1
  1443      1:ord      2:dis   +   0.7  1
  1444      1:ord      1:ord       0.8  1
  1445      1:ord      1:ord       0.5  1
  1446      1:ord      1:ord       0.8  1
  1447      1:ord      1:ord       0.6  1
  1448      1:ord      1:ord       0.7  1
  1449      1:ord      1:ord       0.8  1
  1450      1:ord      1:ord       0.7  1
  1451      1:ord      1:ord       0.6  1
  1452      1:ord      1:ord       0.7  1
  1453      1:ord      1:ord       0.8  1
  1454      1:ord      1:ord       0.7  1
  1455      1:ord      1:ord       1  1
  1456      1:ord      1:ord       0.7  1
  1457      1:ord      1:ord       0.9  1
  1458      1:ord      1:ord       0.7  1
  1459      1:ord      1:ord       0.9  1
  1460      1:ord      1:ord       0.7  1
  1461      1:ord      1:ord       0.8  1
  1462      1:ord      1:ord       1  1
  1463      1:ord      1:ord       1  1
  1464      1:ord      1:ord       0.9  1
  1465      1:ord      1:ord       0.9  1
  1466      1:ord      1:ord       0.8  1
  1467      1:ord      1:ord       0.9  1
  1468      1:ord      1:ord       0.6  1
  1469      1:ord      1:ord       0.9  1
  1470      1:ord      1:ord       1  1
  1471      1:ord      1:ord       0.8  1
  1472      1:ord      1:ord       0.7  1
  1473      1:ord      1:ord       0.6  1
  1474      1:ord      1:ord       0.8  1
  1475      1:ord      2:dis   +   0.6  1
  1476      1:ord      1:ord       0.8  1
  1477      1:ord      1:ord       0.7  1
  1478      1:ord      1:ord       0.8  1
  1479      1:ord      1:ord       0.6  1
  1480      1:ord      1:ord       0.9  1
  1481      1:ord      2:dis   +   0.6  1
  1482      1:ord      1:ord       0.8  1
  1483      1:ord      1:ord       0.9  1
  1484      1:ord      1:ord       1  1
  1485      1:ord      1:ord       0.6  1
  1486      1:ord      2:dis   +   0.7  1
  1487      1:ord      1:ord       0.6  1
  1488      1:ord      1:ord       0.9  1
  1489      1:ord      2:dis   +   0.6  1
  1490      1:ord      2:dis   +   0.6  1
  1491      1:ord      1:ord       0.7  1
  1492      1:ord      1:ord       0.8  1
  1493      1:ord      1:ord       0.5  1
  1494      1:ord      1:ord       0.5  1
  1495      1:ord      1:ord       0.8  1
  1496      1:ord      1:ord       0.8  1
  1497      1:ord      1:ord       0.6  1
  1498      1:ord      1:ord       0.7  1
  1499      1:ord      1:ord       0.6  1
  1500      1:ord      1:ord       0.7  1
  1501      1:ord      1:ord       0.9  1
  1502      1:ord      1:ord       1  1
  1503      1:ord      1:ord       0.6  1
  1504      1:ord      1:ord       0.7  1
  1505      1:ord      1:ord       0.7  1
  1506      1:ord      1:ord       0.6  1
  1507      1:ord      1:ord       0.7  1
  1508      1:ord      1:ord       0.8  1
  1509      1:ord      1:ord       0.7  1
  1510      1:ord      1:ord       0.8  1
  1511      1:ord      1:ord       0.9  1
  1512      1:ord      1:ord       0.9  1
  1513      1:ord      1:ord       0.8  1
  1514      1:ord      1:ord       0.7  1
  1515      1:ord      1:ord       0.9  1
  1516      1:ord      1:ord       0.9  1
  1517      1:ord      1:ord       0.6  1
  1518      1:ord      1:ord       0.8  1
  1519      1:ord      1:ord       0.8  1
  1520      1:ord      1:ord       0.6  1
  1521      1:ord      1:ord       0.9  1
  1522      1:ord      1:ord       0.8  1
  1523      1:ord      1:ord       0.8  1
  1524      1:ord      1:ord       0.8  1
  1525      1:ord      1:ord       0.7  1
  1526      1:ord      1:ord       0.9  1
  1527      1:ord      1:ord       0.7  1
  1528      1:ord      1:ord       0.8  1
  1529      1:ord      1:ord       0.9  1
  1530      1:ord      1:ord       0.7  1
  1531      1:ord      1:ord       0.8  1
  1532      1:ord      1:ord       0.7  1
  1533      1:ord      1:ord       0.8  1
  1534      1:ord      1:ord       0.5  1
  1535      1:ord      1:ord       0.9  1
  1536      1:ord      1:ord       1  1
  1537      1:ord      1:ord       0.6  1
  1538      1:ord      1:ord       0.5  1
  1539      1:ord      1:ord       0.6  1
  1540      1:ord      1:ord       0.8  1
  1541      1:ord      1:ord       0.7  1
  1542      1:ord      2:dis   +   0.6  1
  1543      1:ord      1:ord       0.8  1
  1544      1:ord      1:ord       0.8  1
  1545      1:ord      1:ord       0.8  1
  1546      1:ord      1:ord       0.6  1
  1547      1:ord      1:ord       0.5  1
  1548      1:ord      1:ord       0.6  1
  1549      1:ord      1:ord       0.8  1
  1550      1:ord      1:ord       0.8  1
  1551      1:ord      1:ord       0.5  1
  1552      1:ord      1:ord       0.8  1
  1553      1:ord      1:ord       0.9  1
  1554      1:ord      1:ord       0.7  1
  1555      1:ord      1:ord       0.7  1
  1556      1:ord      1:ord       0.9  1
  1557      1:ord      1:ord       0.8  1
  1558      1:ord      1:ord       0.9  1
  1559      1:ord      1:ord       0.7  1
  1560      1:ord      1:ord       0.5  1
  1561      1:ord      1:ord       0.6  1
  1562      1:ord      1:ord       0.7  1
  1563      1:ord      1:ord       0.9  1
  1564      1:ord      1:ord       0.6  1
  1565      1:ord      1:ord       0.6  1
  1566      1:ord      2:dis   +   0.6  1
  1567      1:ord      1:ord       0.8  1
  1568      1:ord      1:ord       0.6  1
  1569      1:ord      2:dis   +   0.7  1
  1570      1:ord      1:ord       0.6  1
  1571      1:ord      1:ord       0.8  1
  1572      1:ord      1:ord       0.6  1
  1573      1:ord      1:ord       0.9  1
  1574      1:ord      1:ord       0.5  1
  1575      1:ord      1:ord       0.5  1
  1576      1:ord      1:ord       0.8  1
  1577      1:ord      1:ord       0.7  1
  1578      1:ord      1:ord       0.7  1
  1579      1:ord      1:ord       0.7  1
  1580      1:ord      1:ord       0.9  1
  1581      1:ord      1:ord       0.9  1
  1582      1:ord      1:ord       0.8  1
  1583      1:ord      1:ord       0.9  1
  1584      1:ord      1:ord       0.6  1
  1585      1:ord      1:ord       0.9  1
  1586      1:ord      1:ord       0.8  1
  1587      1:ord      1:ord       0.6  1
  1588      1:ord      1:ord       0.8  1
  1589      1:ord      1:ord       0.9  1
  1590      1:ord      1:ord       0.7  1
  1591      1:ord      1:ord       0.7  1
  1592      1:ord      1:ord       0.9  1
  1593      1:ord      1:ord       0.8  1
  1594      1:ord      1:ord       0.9  1
  1595      1:ord      1:ord       0.5  1
  1596      1:ord      1:ord       0.8  1
  1597      1:ord      1:ord       0.8  1
  1598      1:ord      1:ord       0.7  1
  1599      1:ord      1:ord       1  1
  1600      1:ord      1:ord       0.9  1
  1601      1:ord      1:ord       0.7  1
  1602      1:ord      1:ord       1  1
  1603      1:ord      1:ord       0.5  1
  1604      1:ord      1:ord       0.5  1
  1605      1:ord      1:ord       0.5  1
  1606      1:ord      2:dis   +   0.6  1
  1607      1:ord      1:ord       0.7  1
  1608      1:ord      1:ord       0.5  1
  1609      1:ord      2:dis   +   0.6  1
  1610      1:ord      1:ord       0.8  1
  1611      1:ord      1:ord       0.6  1
  1612      1:ord      2:dis   +   0.6  1
  1613      1:ord      1:ord       0.5  1
  1614      1:ord      1:ord       0.7  1
  1615      1:ord      1:ord       0.9  1
  1616      1:ord      1:ord       0.7  1
  1617      1:ord      1:ord       0.7  1
  1618      1:ord      1:ord       0.9  1
  1619      1:ord      1:ord       0.7  1
  1620      1:ord      1:ord       0.9  1
  1621      1:ord      1:ord       0.8  1
  1622      1:ord      1:ord       0.8  1
  1623      1:ord      1:ord       0.7  1
  1624      1:ord      1:ord       0.7  1
  1625      1:ord      1:ord       0.6  1
  1626      1:ord      1:ord       0.5  1
  1627      1:ord      1:ord       0.9  1
  1628      1:ord      1:ord       0.8  1
  1629      1:ord      1:ord       0.7  1
  1630      1:ord      1:ord       0.8  1
  1631      1:ord      1:ord       0.9  1
  1632      1:ord      1:ord       0.6  1
  1633      1:ord      1:ord       0.7  1
  1634      1:ord      1:ord       0.9  1
  1635      1:ord      1:ord       0.7  1
  1636      1:ord      1:ord       0.7  1
  1637      1:ord      1:ord       0.7  1
  1638      1:ord      1:ord       0.9  1
  1639      1:ord      1:ord       0.7  1
  1640      1:ord      1:ord       0.6  1
  1641      1:ord      1:ord       0.8  1
  1642      1:ord      1:ord       0.7  1
  1643      1:ord      1:ord       0.8  1
  1644      1:ord      1:ord       0.7  1
  1645      1:ord      1:ord       0.5  1
  1646      1:ord      1:ord       0.5  1
  1647      1:ord      1:ord       0.6  1
  1648      1:ord      1:ord       0.8  1
  1649      1:ord      1:ord       0.6  1
  1650      1:ord      2:dis   +   0.6  1
  1651      1:ord      2:dis   +   0.7  1
  1652      1:ord      1:ord       0.8  1
  1653      1:ord      1:ord       0.5  1
  1654      1:ord      1:ord       0.6  1
  1655      1:ord      1:ord       0.6  1
  1656      1:ord      1:ord       0.7  1
  1657      1:ord      1:ord       0.5  1
  1658      1:ord      1:ord       0.6  1
  1659      1:ord      2:dis   +   0.7  1
  1660      1:ord      1:ord       0.6  1
  1661      1:ord      2:dis   +   0.6  1
  1662      1:ord      1:ord       0.5  1
  1663      1:ord      2:dis   +   0.6  1
  1664      1:ord      2:dis   +   1  1
  1665      1:ord      1:ord       0.5  1
  1666      1:ord      1:ord       0.5  1
  1667      1:ord      1:ord       0.5  1
  1668      1:ord      2:dis   +   0.6  1
  1669      1:ord      2:dis   +   0.7  1
  1670      1:ord      1:ord       0.5  1
  1671      1:ord      2:dis   +   0.6  1
  1672      1:ord      1:ord       0.5  1
  1673      1:ord      1:ord       0.7  1
  1674      1:ord      1:ord       0.5  1
  1675      1:ord      2:dis   +   0.8  2
  1676      1:ord      1:ord       0.6  1
  1677      1:ord      1:ord       0.6  1
  1678      1:ord      1:ord       0.5  1
  1679      1:ord      1:ord       0.6  1
  1680      1:ord      2:dis   +   0.6  1
  1681      1:ord      1:ord       0.6  1
  1682      1:ord      1:ord       0.5  1
  1683      1:ord      1:ord       0.6  1
  1684      1:ord      2:dis   +   0.6  1
  1685      1:ord      1:ord       0.6  1
  1686      1:ord      1:ord       0.7  1
  1687      1:ord      1:ord       0.7  1
  1688      1:ord      1:ord       0.9  1
  1689      1:ord      1:ord       0.6  1
  1690      1:ord      1:ord       0.9  1
  1691      1:ord      1:ord       0.5  1
  1692      1:ord      1:ord       0.7  1
  1693      1:ord      1:ord       0.9  1
  1694      1:ord      1:ord       0.9  1
  1695      1:ord      1:ord       0.6  1
  1696      1:ord      1:ord       0.6  1
  1697      1:ord      1:ord       0.7  1
  1698      1:ord      1:ord       0.8  1
  1699      1:ord      1:ord       0.8  1
  1700      1:ord      1:ord       0.7  1
  1701      1:ord      1:ord       0.9  1
  1702      1:ord      1:ord       0.9  1
  1703      1:ord      1:ord       1  1
  1704      1:ord      1:ord       0.5  1
  1705      1:ord      1:ord       0.6  1
  1706      1:ord      1:ord       0.8  1
  1707      1:ord      1:ord       0.6  1
  1708      1:ord      1:ord       0.7  1
  1709      1:ord      1:ord       0.7  1
  1710      1:ord      1:ord       0.7  1
  1711      1:ord      1:ord       0.7  1
  1712      1:ord      1:ord       0.8  1
  1713      1:ord      1:ord       0.6  1
  1714      1:ord      1:ord       1  1
  1715      1:ord      1:ord       0.6  1
  1716      1:ord      1:ord       0.8  1
  1717      1:ord      1:ord       0.8  1
  1718      1:ord      1:ord       1  1
  1719      1:ord      1:ord       0.9  1
  1720      1:ord      1:ord       0.5  1
  1721      1:ord      1:ord       0.7  1
  1722      1:ord      1:ord       0.9  1
  1723      1:ord      1:ord       0.7  1
  1724      1:ord      1:ord       0.6  1
  1725      1:ord      1:ord       0.5  1
  1726      1:ord      1:ord       0.6  1
  1727      1:ord      1:ord       0.6  1
  1728      1:ord      1:ord       0.7  1
  1729      1:ord      1:ord       0.7  1
  1730      1:ord      1:ord       0.9  1
  1731      1:ord      1:ord       0.7  1
  1732      1:ord      2:dis   +   0.6  1
  1733      1:ord      1:ord       0.9  1
  1734      1:ord      1:ord       0.6  1
  1735      1:ord      2:dis   +   0.6  1
  1736      1:ord      1:ord       0.7  1
  1737      1:ord      1:ord       0.5  1
  1738      1:ord      2:dis   +   0.6  1
  1739      1:ord      1:ord       0.7  1
  1740      1:ord      1:ord       0.6  1
  1741      1:ord      1:ord       0.5  1
  1742      1:ord      1:ord       0.8  1
  1743      1:ord      1:ord       0.6  1
  1744      1:ord      1:ord       0.6  1
  1745      1:ord      1:ord       0.9  1
  1746      1:ord      1:ord       0.6  1
  1747      1:ord      1:ord       0.5  1
  1748      1:ord      1:ord       0.5  1
  1749      1:ord      1:ord       0.6  1
  1750      1:ord      2:dis   +   0.6  1
  1751      1:ord      2:dis   +   0.6  2
  1752      1:ord      1:ord       0.7  1
  1753      1:ord      1:ord       0.7  1
  1754      1:ord      2:dis   +   0.6  2
  1755      1:ord      1:ord       0.6  1
  1756      1:ord      1:ord       0.6  1
  1757      1:ord      1:ord       0.8  1
  1758      1:ord      1:ord       0.5  1
  1759      1:ord      1:ord       0.8  1
  1760      1:ord      1:ord       0.5  1
  1761      1:ord      1:ord       0.7  1
  1762      1:ord      1:ord       0.6  1
  1763      1:ord      1:ord       0.6  1
  1764      1:ord      1:ord       0.8  1
  1765      1:ord      1:ord       0.9  1
  1766      1:ord      1:ord       0.5  1
  1767      1:ord      1:ord       0.5  1
  1768      1:ord      1:ord       0.7  1
  1769      1:ord      1:ord       0.9  1
  1770      1:ord      1:ord       0.6  1
  1771      1:ord      1:ord       0.7  1
  1772      1:ord      1:ord       0.9  1
  1773      1:ord      1:ord       0.8  1
  1774      1:ord      1:ord       0.8  1
  1775      1:ord      1:ord       1  1
  1776      1:ord      1:ord       0.7  1
  1777      1:ord      1:ord       0.9  1
  1778      1:ord      1:ord       0.8  1
  1779      1:ord      1:ord       0.8  1
  1780      1:ord      1:ord       0.8  1
  1781      1:ord      1:ord       0.9  1
  1782      1:ord      1:ord       0.8  1
  1783      1:ord      1:ord       0.7  1
  1784      1:ord      1:ord       0.8  1
  1785      1:ord      1:ord       0.9  1
  1786      1:ord      1:ord       0.8  1
  1787      1:ord      1:ord       0.7  1
  1788      1:ord      1:ord       1  1
  1789      1:ord      1:ord       0.7  1
  1790      1:ord      1:ord       0.9  1
  1791      1:ord      1:ord       0.7  1
  1792      1:ord      1:ord       0.6  1
  1793      1:ord      1:ord       0.6  1
  1794      1:ord      1:ord       0.9  1
  1795      1:ord      1:ord       0.6  1
  1796      1:ord      1:ord       0.8  1
  1797      1:ord      2:dis   +   0.7  1
  1798      1:ord      1:ord       0.8  1
  1799      1:ord      1:ord       0.6  1
  1800      1:ord      1:ord       0.6  1
  1801      1:ord      1:ord       0.6  1
  1802      1:ord      2:dis   +   0.8  1
  1803      1:ord      2:dis   +   0.7  1
  1804      1:ord      2:dis   +   0.8  1
  1805      1:ord      1:ord       0.7  1
  1806      1:ord      2:dis   +   0.7  1
  1807      1:ord      2:dis   +   0.7  1
  1808      1:ord      1:ord       0.5  1
  1809      1:ord      1:ord       0.5  1
  1810      1:ord      1:ord       0.6  1
  1811      1:ord      2:dis   +   0.7  1
  1812      1:ord      1:ord       0.9  1
  1813      1:ord      1:ord       0.6  1
  1814      1:ord      2:dis   +   0.6  1
  1815      1:ord      1:ord       0.7  1
  1816      1:ord      1:ord       0.7  1
  1817      1:ord      1:ord       0.7  1
  1818      1:ord      1:ord       0.7  1
  1819      1:ord      1:ord       0.7  1
  1820      1:ord      1:ord       1  1
  1821      1:ord      1:ord       0.7  1
  1822      1:ord      1:ord       0.6  1
  1823      1:ord      1:ord       0.8  1
  1824      1:ord      1:ord       0.8  1
  1825      1:ord      1:ord       0.6  1
  1826      1:ord      1:ord       0.7  1
  1827      1:ord      1:ord       0.7  1
  1828      1:ord      1:ord       0.8  1
  1829      1:ord      1:ord       0.5  1
  1830      1:ord      1:ord       0.7  1
  1831      1:ord      1:ord       1  1
  1832      1:ord      1:ord       0.5  1
  1833      1:ord      1:ord       0.9  1
  1834      1:ord      1:ord       0.8  1
  1835      1:ord      1:ord       0.6  1
  1836      1:ord      1:ord       0.9  1
  1837      1:ord      1:ord       0.9  1
  1838      1:ord      1:ord       0.9  1
  1839      1:ord      1:ord       0.6  1
  1840      1:ord      1:ord       0.8  1
  1841      1:ord      1:ord       0.5  1
  1842      1:ord      1:ord       0.7  1
  1843      1:ord      1:ord       0.9  1
  1844      1:ord      1:ord       0.9  1
  1845      1:ord      1:ord       0.7  1
  1846      1:ord      1:ord       0.8  1
  1847      1:ord      1:ord       0.8  1
  1848      1:ord      1:ord       0.7  1
  1849      1:ord      1:ord       0.8  1
  1850      1:ord      1:ord       1  1
  1851      1:ord      1:ord       0.7  1
  1852      1:ord      1:ord       0.8  1
  1853      1:ord      1:ord       0.6  1
  1854      1:ord      1:ord       0.7  1
  1855      1:ord      1:ord       0.6  1
  1856      1:ord      1:ord       0.8  1
  1857      1:ord      1:ord       0.6  1
  1858      1:ord      1:ord       0.5  1
  1859      1:ord      1:ord       0.7  1
  1860      1:ord      1:ord       0.8  1
  1861      1:ord      1:ord       0.7  1
  1862      1:ord      1:ord       0.5  1
  1863      1:ord      1:ord       0.8  1
  1864      1:ord      1:ord       0.8  1
  1865      1:ord      1:ord       0.7  1
  1866      1:ord      1:ord       0.8  1
  1867      1:ord      1:ord       0.6  1
  1868      1:ord      1:ord       0.7  1
  1869      1:ord      1:ord       0.7  1
  1870      1:ord      1:ord       0.8  1
  1871      1:ord      1:ord       0.8  1
  1872      1:ord      1:ord       0.9  1
  1873      1:ord      1:ord       0.5  1
  1874      1:ord      1:ord       0.7  1
  1875      1:ord      1:ord       0.8  1
  1876      1:ord      1:ord       0.6  1
  1877      1:ord      1:ord       0.8  1
  1878      1:ord      1:ord       0.7  1
  1879      1:ord      1:ord       0.6  1
  1880      1:ord      1:ord       0.7  1
  1881      1:ord      1:ord       0.7  1
  1882      1:ord      1:ord       1  1
  1883      1:ord      1:ord       0.8  1
  1884      1:ord      1:ord       0.9  1
  1885      1:ord      1:ord       0.8  1
  1886      1:ord      1:ord       0.5  1
  1887      1:ord      1:ord       0.8  1
  1888      1:ord      1:ord       0.9  1
  1889      1:ord      1:ord       0.9  1
  1890      1:ord      1:ord       0.8  1
  1891      1:ord      1:ord       0.9  1
  1892      1:ord      1:ord       0.8  1
  1893      1:ord      1:ord       0.8  1
  1894      1:ord      1:ord       1  1
  1895      1:ord      1:ord       0.9  1
  1896      1:ord      1:ord       0.6  1
  1897      1:ord      1:ord       0.6  1
  1898      1:ord      1:ord       0.7  1
  1899      1:ord      2:dis   +   0.6  1
  1900      1:ord      1:ord       1  1
  1901      1:ord      2:dis   +   0.6  1
  1902      1:ord      1:ord       0.8  1
  1903      1:ord      1:ord       0.8  1
  1904      1:ord      1:ord       0.8  1
  1905      2:dis      2:dis       0.9  2
  1906      2:dis      2:dis       0.6  2
  1907      2:dis      2:dis       0.6  2
  1908      2:dis      2:dis       0.6  2
  1909      2:dis      1:ord   +   0.5  2
  1910      2:dis      2:dis       0.7  2
  1911      2:dis      1:ord   +   0.7  2
  1912      2:dis      2:dis       0.7  2
  1913      1:ord      1:ord       0.5  1
  1914      1:ord      1:ord       0.6  1
  1915      1:ord      1:ord       0.7  1
  1916      1:ord      1:ord       0.5  1
  1917      1:ord      1:ord       0.8  1
  1918      1:ord      1:ord       0.8  1
  1919      1:ord      2:dis   +   0.7  1
  1920      1:ord      1:ord       0.9  1
  1921      1:ord      1:ord       0.7  1
  1922      1:ord      1:ord       1  1
  1923      1:ord      1:ord       0.7  1
  1924      1:ord      1:ord       0.6  1
  1925      1:ord      1:ord       0.6  1
  1926      1:ord      1:ord       0.9  1
  1927      1:ord      1:ord       0.6  1
  1928      1:ord      1:ord       0.7  1
  1929      1:ord      1:ord       0.8  1
  1930      1:ord      1:ord       0.8  1
  1931      1:ord      1:ord       1  1
  1932      1:ord      1:ord       0.6  1
  1933      1:ord      1:ord       0.7  1
  1934      1:ord      1:ord       0.9  1
  1935      1:ord      1:ord       0.8  1
  1936      1:ord      1:ord       0.7  1
  1937      1:ord      1:ord       0.7  1
  1938      1:ord      1:ord       0.7  1
  1939      1:ord      1:ord       0.5  1
  1940      1:ord      1:ord       1  1
  1941      1:ord      1:ord       0.7  1
  1942      1:ord      1:ord       0.5  1
  1943      1:ord      1:ord       0.8  1
  1944      1:ord      1:ord       0.9  1
  1945      1:ord      1:ord       0.8  1
  1946      1:ord      1:ord       0.6  1
  1947      1:ord      1:ord       0.7  1
  1948      1:ord      1:ord       0.9  1
  1949      1:ord      1:ord       0.8  1
  1950      1:ord      1:ord       1  1
  1951      1:ord      1:ord       0.6  1
  1952      1:ord      1:ord       0.9  1
  1953      1:ord      1:ord       0.9  1
  1954      1:ord      1:ord       0.5  1
  1955      1:ord      1:ord       1  1
  1956      1:ord      1:ord       0.9  1
  1957      1:ord      1:ord       1  1
  1958      1:ord      1:ord       0.8  1
  1959      1:ord      1:ord       0.5  1
  1960      1:ord      1:ord       0.8  1
  1961      1:ord      1:ord       0.6  1
  1962      1:ord      1:ord       0.8  1
  1963      1:ord      1:ord       0.8  1
  1964      1:ord      1:ord       0.8  1
  1965      1:ord      1:ord       0.9  1
  1966      1:ord      1:ord       0.6  1
  1967      1:ord      1:ord       0.6  1
  1968      1:ord      1:ord       0.7  1
  1969      1:ord      1:ord       0.6  1
  1970      1:ord      1:ord       0.6  1
  1971      1:ord      1:ord       0.8  1
  1972      1:ord      1:ord       0.5  1
  1973      1:ord      2:dis   +   0.7  1
  1974      1:ord      2:dis   +   0.8  1
  1975      1:ord      1:ord       0.7  1
  1976      1:ord      1:ord       0.7  1
  1977      1:ord      2:dis   +   0.6  1
  1978      1:ord      1:ord       0.5  1
  1979      1:ord      1:ord       0.6  1
  1980      1:ord      1:ord       0.6  1
  1981      1:ord      1:ord       0.8  1
  1982      1:ord      2:dis   +   0.7  1
  1983      1:ord      1:ord       0.6  1
  1984      1:ord      1:ord       0.6  1
  1985      1:ord      1:ord       0.8  1
  1986      1:ord      1:ord       0.6  1
  1987      1:ord      1:ord       0.7  1
  1988      1:ord      1:ord       0.5  1
  1989      1:ord      1:ord       0.8  1
  1990      1:ord      2:dis   +   0.6  1
  1991      1:ord      1:ord       0.9  1
  1992      1:ord      1:ord       0.5  1
  1993      1:ord      1:ord       0.8  1
  1994      1:ord      1:ord       0.7  1
  1995      1:ord      1:ord       0.6  1
  1996      1:ord      1:ord       0.6  1
  1997      1:ord      2:dis   +   0.7  1
  1998      1:ord      2:dis   +   0.6  1
  1999      1:ord      2:dis   +   0.6  1
  2000      1:ord      2:dis   +   0.8  1
  2001      1:ord      1:ord       0.6  1
  2002      1:ord      1:ord       0.5  1
  2003      1:ord      1:ord       0.7  1
  2004      1:ord      1:ord       0.7  1
  2005      1:ord      2:dis   +   0.9  1
  2006      1:ord      2:dis   +   0.6  1
  2007      1:ord      2:dis   +   0.8  1
  2008      1:ord      1:ord       0.5  1
  2009      1:ord      2:dis   +   0.8  1
  2010      1:ord      2:dis   +   0.7  1
  2011      1:ord      1:ord       0.5  1
  2012      1:ord      2:dis   +   0.7  1
  2013      1:ord      1:ord       0.5  1
  2014      1:ord      1:ord       0.6  1
  2015      1:ord      2:dis   +   0.6  1
  2016      1:ord      1:ord       0.6  1
  2017      1:ord      1:ord       0.5  1
  2018      1:ord      1:ord       0.6  1
  2019      1:ord      1:ord       0.7  1
  2020      1:ord      1:ord       0.8  1
  2021      1:ord      1:ord       0.8  1
  2022      1:ord      1:ord       0.6  1
  2023      1:ord      1:ord       0.7  1
  2024      1:ord      1:ord       0.8  1
  2025      1:ord      1:ord       0.8  1
  2026      1:ord      1:ord       0.6  1
  2027      1:ord      1:ord       0.7  1
  2028      1:ord      1:ord       0.5  1
  2029      1:ord      1:ord       0.5  1
  2030      1:ord      1:ord       0.7  1
  2031      1:ord      1:ord       0.5  1
  2032      1:ord      1:ord       0.8  1
  2033      1:ord      1:ord       0.7  1
  2034      1:ord      1:ord       0.6  1
  2035      1:ord      1:ord       0.7  1
  2036      1:ord      1:ord       0.8  1
  2037      1:ord      1:ord       0.9  1
  2038      1:ord      1:ord       0.7  1
  2039      1:ord      1:ord       0.7  1
  2040      1:ord      1:ord       0.8  1
  2041      1:ord      1:ord       0.6  1
  2042      1:ord      1:ord       0.6  1
  2043      1:ord      1:ord       0.8  1
  2044      1:ord      1:ord       1  1
  2045      1:ord      1:ord       0.8  1
  2046      1:ord      1:ord       0.5  1
  2047      1:ord      2:dis   +   0.8  1
  2048      1:ord      1:ord       0.8  1
  2049      1:ord      1:ord       0.6  1
  2050      1:ord      1:ord       0.8  1
  2051      1:ord      2:dis   +   0.6  1
  2052      1:ord      1:ord       0.8  1
  2053      1:ord      1:ord       0.7  1
  2054      1:ord      1:ord       0.6  1
  2055      1:ord      1:ord       0.8  1
  2056      1:ord      2:dis   +   0.6  1
  2057      1:ord      1:ord       0.7  1
  2058      1:ord      1:ord       0.7  1
  2059      1:ord      1:ord       0.7  1
  2060      1:ord      2:dis   +   0.6  1
  2061      1:ord      1:ord       0.6  1
  2062      1:ord      1:ord       0.8  1
  2063      1:ord      1:ord       0.8  1
  2064      1:ord      1:ord       0.6  1
  2065      1:ord      1:ord       0.8  1
  2066      1:ord      1:ord       0.5  1
  2067      1:ord      1:ord       1  1
  2068      1:ord      1:ord       0.6  1
  2069      1:ord      1:ord       0.7  1
  2070      1:ord      1:ord       0.7  1
  2071      1:ord      2:dis   +   0.8  1
  2072      1:ord      1:ord       0.6  1
  2073      1:ord      1:ord       0.6  1
  2074      1:ord      1:ord       0.5  1
  2075      1:ord      1:ord       0.6  1
  2076      1:ord      1:ord       0.7  1
  2077      1:ord      2:dis   +   0.9  1
  2078      1:ord      1:ord       0.6  1
  2079      1:ord      1:ord       0.7  1
  2080      1:ord      1:ord       0.8  1
  2081      1:ord      2:dis   +   0.6  1
  2082      1:ord      1:ord       0.6  1
  2083      1:ord      1:ord       0.5  1
  2084      1:ord      1:ord       0.5  1
  2085      1:ord      2:dis   +   0.7  2
  2086      1:ord      2:dis   +   0.6  2
  2087      1:ord      2:dis   +   0.9  2
  2088      1:ord      2:dis   +   0.6  2
  2089      1:ord      2:dis   +   0.7  2
  2090      1:ord      2:dis   +   0.6  2
  2091      1:ord      1:ord       0.5  1
  2092      1:ord      1:ord       0.5  1
  2093      1:ord      1:ord       0.6  1
  2094      2:dis      1:ord   +   0.6  1
  2095      2:dis      1:ord   +   0.9  1
  2096      2:dis      1:ord   +   0.6  1
  2097      2:dis      2:dis       0.8  2
  2098      2:dis      2:dis       0.6  2
  2099      1:ord      2:dis   +   0.6  2
  2100      1:ord      2:dis   +   0.6  2
  2101      1:ord      2:dis   +   0.8  2
  2102      1:ord      2:dis   +   0.6  2
  2103      1:ord      2:dis   +   0.9  2
  2104      1:ord      2:dis   +   0.7  2
  2105      1:ord      1:ord       0.6  2
  2106      1:ord      2:dis   +   0.8  2
  2107      1:ord      2:dis   +   0.6  2
  2108      1:ord      1:ord       0.5  2
  2109      1:ord      2:dis   +   0.6  2
  2110      1:ord      1:ord       0.5  2
  2111      1:ord      2:dis   +   0.6  2
  2112      1:ord      2:dis   +   0.7  2
  2113      1:ord      2:dis   +   0.6  2
  2114      1:ord      2:dis   +   0.7  2
  2115      1:ord      2:dis   +   0.7  2
  2116      1:ord      1:ord       0.5  2
  2117      1:ord      1:ord       0.6  2
  2118      1:ord      2:dis   +   0.6  2
  2119      1:ord      2:dis   +   0.8  2
  2120      1:ord      2:dis   +   0.7  2
  2121      1:ord      2:dis   +   0.8  2
  2122      1:ord      1:ord       0.6  2
  2123      1:ord      1:ord       0.5  2
  2124      1:ord      2:dis   +   0.7  2
  2125      1:ord      2:dis   +   0.6  2
  2126      1:ord      2:dis   +   0.7  2
  2127      1:ord      2:dis   +   0.8  2
  2128      1:ord      1:ord       0.6  2
  2129      2:dis      2:dis       0.7  2
  2130      2:dis      1:ord   +   0.5  2
  2131      2:dis      2:dis       0.7  2
  2132      2:dis      2:dis       0.7  2
  2133      2:dis      2:dis       0.7  2
  2134      2:dis      1:ord   +   0.5  2
  2135      1:ord      1:ord       0.5  2
  2136      1:ord      2:dis   +   0.6  2
  2137      1:ord      1:ord       0.6  1
  2138      1:ord      1:ord       0.6  1
  2139      1:ord      1:ord       0.8  1
  2140      1:ord      1:ord       0.5  1
  2141      1:ord      1:ord       0.5  1
  2142      1:ord      1:ord       0.5  1
  2143      1:ord      1:ord       0.6  1
  2144      1:ord      1:ord       0.8  1
  2145      1:ord      2:dis   +   0.6  1
  2146      1:ord      1:ord       0.5  1
  2147      1:ord      1:ord       0.6  1
  2148      1:ord      2:dis   +   0.6  1
  2149      1:ord      2:dis   +   0.6  1
  2150      1:ord      1:ord       0.5  1
  2151      1:ord      1:ord       0.6  1
  2152      1:ord      1:ord       0.5  1
  2153      1:ord      2:dis   +   0.6  1
  2154      1:ord      1:ord       0.6  1
  2155      1:ord      2:dis   +   0.6  1
  2156      1:ord      1:ord       0.5  1
  2157      1:ord      1:ord       0.7  1
  2158      1:ord      2:dis   +   0.8  1
  2159      1:ord      1:ord       0.6  1
  2160      1:ord      1:ord       0.6  1
  2161      1:ord      1:ord       0.6  1
  2162      1:ord      1:ord       0.9  1
  2163      1:ord      1:ord       0.5  1
  2164      1:ord      1:ord       0.6  1
  2165      1:ord      2:dis   +   0.8  1
  2166      1:ord      1:ord       0.7  1
  2167      1:ord      1:ord       0.7  1
  2168      1:ord      2:dis   +   0.6  1
  2169      1:ord      1:ord       0.6  1
  2170      1:ord      1:ord       0.6  1
  2171      1:ord      1:ord       0.7  1
  2172      1:ord      1:ord       0.7  1
  2173      1:ord      1:ord       0.7  1
  2174      1:ord      1:ord       0.5  1
  2175      1:ord      1:ord       0.8  1
  2176      1:ord      1:ord       0.8  1
  2177      1:ord      1:ord       0.9  1
  2178      1:ord      1:ord       0.7  1
  2179      1:ord      1:ord       0.7  1
  2180      1:ord      1:ord       0.8  1
  2181      1:ord      1:ord       0.8  1
  2182      1:ord      1:ord       0.8  1
  2183      1:ord      1:ord       0.8  1
  2184      1:ord      1:ord       0.6  1
  2185      1:ord      1:ord       0.5  1
  2186      1:ord      1:ord       0.9  1
  2187      1:ord      1:ord       0.6  1
  2188      1:ord      1:ord       0.7  1
  2189      1:ord      1:ord       0.6  1
  2190      1:ord      2:dis   +   0.7  1
  2191      1:ord      2:dis   +   0.7  1
  2192      1:ord      1:ord       0.5  1
  2193      1:ord      1:ord       0.6  1
  2194      1:ord      2:dis   +   0.6  1
  2195      1:ord      2:dis   +   0.6  1
  2196      1:ord      1:ord       0.6  1
  2197      1:ord      2:dis   +   0.6  1
  2198      1:ord      1:ord       0.6  1
  2199      1:ord      1:ord       0.6  1
  2200      1:ord      1:ord       0.6  1
  2201      1:ord      1:ord       0.5  1
  2202      1:ord      1:ord       0.5  1
  2203      1:ord      2:dis   +   0.6  1
  2204      1:ord      1:ord       0.7  1
  2205      1:ord      1:ord       0.6  1
  2206      1:ord      2:dis   +   0.6  1
  2207      1:ord      1:ord       0.7  1
  2208      1:ord      1:ord       0.6  1
  2209      1:ord      1:ord       0.7  1
  2210      1:ord      1:ord       0.5  1
  2211      1:ord      1:ord       0.5  1
  2212      1:ord      1:ord       0.6  1
  2213      1:ord      1:ord       0.5  1
  2214      1:ord      2:dis   +   0.6  1
  2215      1:ord      1:ord       0.7  1
  2216      1:ord      1:ord       0.7  1
  2217      1:ord      2:dis   +   0.6  1
  2218      1:ord      1:ord       0.5  1
  2219      1:ord      1:ord       0.6  1
  2220      1:ord      1:ord       0.5  1
  2221      1:ord      2:dis   +   0.8  1
  2222      1:ord      1:ord       0.6  1
  2223      1:ord      1:ord       0.7  1
  2224      1:ord      1:ord       0.7  1
  2225      1:ord      2:dis   +   0.7  1
  2226      1:ord      2:dis   +   0.6  1
  2227      1:ord      2:dis   +   0.7  1
  2228      1:ord      1:ord       0.8  1
  2229      1:ord      1:ord       0.7  1
  2230      2:dis      1:ord   +   0.6  1
  2231      2:dis      2:dis       0.6  2
  2232      2:dis      2:dis       0.7  2
  2233      2:dis      2:dis       0.9  2
  2234      2:dis      2:dis       0.7  2
  2235      2:dis      2:dis       0.7  2
  2236      2:dis      2:dis       0.9  2
  2237      2:dis      2:dis       0.8  2
  2238      2:dis      2:dis       0.7  2
  2239      2:dis      1:ord   +   0.5  2
  2240      2:dis      2:dis       0.8  2
  2241      2:dis      2:dis       0.9  2
  2242      2:dis      2:dis       0.7  2
  2243      2:dis      2:dis       0.9  2
  2244      2:dis      2:dis       0.8  2
  2245      2:dis      2:dis       1  2
  2246      2:dis      1:ord   +   0.5  2
  2247      2:dis      2:dis       0.6  2
  2248      2:dis      2:dis       0.6  2
  2249      2:dis      2:dis       0.7  2
  2250      2:dis      2:dis       0.7  2
  2251      2:dis      1:ord   +   0.5  2
  2252      2:dis      2:dis       0.6  2
  2253      2:dis      1:ord   +   0.6  2
  2254      2:dis      2:dis       0.6  2
  2255      2:dis      2:dis       0.8  2
  2256      2:dis      2:dis       0.6  2
  2257      2:dis      2:dis       0.8  2
  2258      2:dis      2:dis       0.9  2
  2259      2:dis      2:dis       0.7  2
  2260      2:dis      2:dis       0.7  2
  2261      2:dis      1:ord   +   0.5  2
  2262      2:dis      2:dis       0.8  2
  2263      2:dis      2:dis       1  2
  2264      2:dis      2:dis       0.6  2
  2265      2:dis      2:dis       0.8  2
  2266      2:dis      2:dis       0.8  2
  2267      2:dis      2:dis       0.6  2
  2268      2:dis      2:dis       0.9  2
  2269      2:dis      2:dis       0.8  2
  2270      2:dis      2:dis       0.7  2
  2271      2:dis      2:dis       0.8  2
  2272      2:dis      2:dis       0.7  2
  2273      2:dis      2:dis       0.9  2
  2274      2:dis      2:dis       0.8  2
  2275      2:dis      2:dis       0.8  2
  2276      2:dis      2:dis       1  2
  2277      2:dis      1:ord   +   0.6  2
  2278      2:dis      2:dis       0.8  2
  2279      2:dis      2:dis       0.9  2
  2280      2:dis      1:ord   +   0.5  2
  2281      2:dis      2:dis       0.9  2
  2282      2:dis      2:dis       0.7  2
  2283      2:dis      2:dis       0.9  2
  2284      2:dis      2:dis       0.8  2
  2285      2:dis      2:dis       0.8  2
  2286      2:dis      2:dis       1  2
  2287      2:dis      2:dis       0.6  2
  2288      2:dis      2:dis       0.8  2
  2289      2:dis      2:dis       1  2
  2290      2:dis      2:dis       0.9  2
  2291      2:dis      2:dis       0.9  2
  2292      2:dis      2:dis       0.9  2
  2293      2:dis      2:dis       0.8  2
  2294      2:dis      2:dis       0.7  2
  2295      2:dis      2:dis       0.7  2
  2296      2:dis      1:ord   +   0.6  2
  2297      2:dis      2:dis       0.9  2
  2298      2:dis      2:dis       0.7  2
  2299      2:dis      2:dis       0.8  2
  2300      2:dis      1:ord   +   0.5  2
  2301      2:dis      2:dis       0.7  2
  2302      2:dis      2:dis       1  2
  2303      2:dis      2:dis       0.7  2
  2304      2:dis      2:dis       0.8  2
  2305      2:dis      2:dis       0.8  2
  2306      2:dis      2:dis       0.8  2
  2307      2:dis      2:dis       0.8  2
  2308      2:dis      2:dis       0.7  2
  2309      2:dis      2:dis       0.9  2
  2310      2:dis      2:dis       1  2
  2311      2:dis      2:dis       0.7  2
  2312      2:dis      2:dis       0.8  2
  2313      2:dis      2:dis       0.6  2
  2314      2:dis      1:ord   +   0.7  1
  2315      2:dis      1:ord   +   0.7  1
  2316      2:dis      1:ord   +   0.8  1
  2317      1:ord      1:ord       0.8  1
  2318      1:ord      1:ord       0.8  1
  2319      1:ord      1:ord       0.6  1
  2320      1:ord      1:ord       1  1
  2321      1:ord      1:ord       0.7  1
  2322      1:ord      1:ord       0.8  1
  2323      1:ord      1:ord       0.9  1
  2324      1:ord      1:ord       0.8  1
  2325      1:ord      1:ord       0.7  1
  2326      1:ord      1:ord       0.8  1
  2327      1:ord      1:ord       0.8  1
  2328      1:ord      1:ord       0.9  1
  2329      1:ord      1:ord       1  1
  2330      1:ord      1:ord       0.6  1
  2331      1:ord      1:ord       0.9  1
  2332      1:ord      1:ord       0.7  1
  2333      1:ord      1:ord       0.6  1
  2334      1:ord      1:ord       0.6  1
  2335      1:ord      1:ord       0.7  1
  2336      1:ord      1:ord       0.8  1
  2337      1:ord      1:ord       0.5  1
  2338      1:ord      1:ord       0.5  1
  2339      1:ord      1:ord       0.5  1
  2340      1:ord      1:ord       0.5  1
  2341      1:ord      1:ord       0.5  1
  2342      1:ord      1:ord       0.6  1
  2343      1:ord      1:ord       0.9  1
  2344      1:ord      2:dis   +   0.7  1
  2345      1:ord      1:ord       0.8  1
  2346      1:ord      1:ord       0.6  1
  2347      1:ord      1:ord       0.5  1
  2348      1:ord      1:ord       0.5  1
  2349      1:ord      1:ord       0.7  1
  2350      1:ord      1:ord       1  1
  2351      1:ord      1:ord       0.7  1
  2352      1:ord      1:ord       0.8  1
  2353      1:ord      1:ord       0.8  1
  2354      1:ord      1:ord       0.6  1
  2355      1:ord      1:ord       0.7  1
  2356      1:ord      1:ord       0.5  1
  2357      1:ord      1:ord       0.8  1
  2358      1:ord      1:ord       0.7  1
  2359      1:ord      1:ord       0.6  1
  2360      1:ord      1:ord       0.7  1
  2361      1:ord      1:ord       0.8  1
  2362      1:ord      1:ord       0.7  1
  2363      1:ord      1:ord       0.8  1
  2364      1:ord      1:ord       0.7  1
  2365      1:ord      1:ord       0.8  1
  2366      1:ord      1:ord       0.9  1
  2367      1:ord      1:ord       0.7  1
  2368      1:ord      1:ord       0.6  1
  2369      1:ord      1:ord       0.5  1
  2370      1:ord      1:ord       0.6  1
  2371      1:ord      1:ord       0.5  1
  2372      1:ord      1:ord       0.9  1
  2373      1:ord      1:ord       0.9  1
  2374      1:ord      1:ord       0.7  1
  2375      1:ord      1:ord       0.9  1
  2376      1:ord      1:ord       0.6  1
  2377      1:ord      1:ord       0.6  1
  2378      1:ord      1:ord       0.7  1
  2379      1:ord      1:ord       0.9  1
  2380      1:ord      1:ord       0.8  1
  2381      1:ord      1:ord       0.7  1
  2382      1:ord      1:ord       0.8  1
  2383      1:ord      2:dis   +   0.6  1
  2384      1:ord      1:ord       1  1
  2385      1:ord      1:ord       0.8  1
  2386      1:ord      1:ord       0.9  1
  2387      1:ord      1:ord       0.6  1
  2388      1:ord      1:ord       1  1
  2389      1:ord      1:ord       0.5  1
  2390      1:ord      2:dis   +   0.6  1
  2391      1:ord      1:ord       0.8  1
  2392      1:ord      1:ord       0.75  1
  2393      1:ord      1:ord       0.6  1
  2394      1:ord      1:ord       0.9  1
  2395      1:ord      2:dis   +   0.6  1
  2396      1:ord      1:ord       0.6  1
  2397      1:ord      1:ord       0.6  1
  2398      1:ord      2:dis   +   0.6  1
  2399      1:ord      2:dis   +   0.6  1
  2400      1:ord      1:ord       0.5  1
  2401      1:ord      1:ord       0.6  1
  2402      1:ord      1:ord       0.8  1
  2403      1:ord      1:ord       0.7  1
  2404      1:ord      1:ord       0.8  1
  2405      1:ord      1:ord       0.8  1
  2406      1:ord      1:ord       0.5  1
  2407      1:ord      1:ord       0.8  1
  2408      1:ord      1:ord       0.6  1
  2409      1:ord      1:ord       0.7  1
  2410      1:ord      1:ord       0.7  1
  2411      1:ord      1:ord       0.7  1
  2412      1:ord      1:ord       0.9  1
  2413      1:ord      1:ord       0.7  1
  2414      1:ord      1:ord       0.8  1
  2415      1:ord      2:dis   +   0.6  1
  2416      1:ord      1:ord       0.9  1
  2417      1:ord      1:ord       0.7  1
  2418      1:ord      1:ord       0.8  1
  2419      1:ord      1:ord       0.7  1
  2420      1:ord      1:ord       0.5  1
  2421      1:ord      1:ord       0.5  1
  2422      1:ord      1:ord       0.7  1
  2423      1:ord      2:dis   +   0.6  1
  2424      1:ord      1:ord       0.7  1
  2425      1:ord      1:ord       0.6  1
  2426      1:ord      1:ord       0.5  1
  2427      1:ord      1:ord       0.7  1
  2428      1:ord      1:ord       0.8  1
  2429      1:ord      1:ord       0.5  1
  2430      1:ord      1:ord       0.7  1
  2431      1:ord      1:ord       0.9  1
  2432      1:ord      1:ord       0.9  1
  2433      1:ord      1:ord       0.7  1
  2434      1:ord      1:ord       0.5  1
  2435      1:ord      2:dis   +   0.6  1
  2436      1:ord      1:ord       0.7  1
  2437      1:ord      1:ord       0.8  1
  2438      1:ord      1:ord       0.7  1
  2439      1:ord      1:ord       0.6  1
  2440      1:ord      1:ord       0.6  1
  2441      1:ord      1:ord       0.8  1
  2442      1:ord      1:ord       0.7  1
  2443      1:ord      1:ord       0.7  1
  2444      1:ord      1:ord       0.7  1
  2445      1:ord      2:dis   +   0.6  1
  2446      1:ord      2:dis   +   0.7  1
  2447      1:ord      1:ord       0.8  1
  2448      1:ord      1:ord       0.7  1
  2449      1:ord      1:ord       0.7  1
  2450      1:ord      1:ord       0.7  1
  2451      1:ord      2:dis   +   0.6  1
  2452      1:ord      1:ord       0.6  1
  2453      1:ord      1:ord       0.5  1
  2454      1:ord      1:ord       0.5  1
  2455      1:ord      1:ord       0.5  1
  2456      1:ord      1:ord       0.8  1
  2457      1:ord      2:dis   +   0.6  1
  2458      1:ord      1:ord       0.6  1
  2459      1:ord      1:ord       0.6  1
  2460      1:ord      1:ord       0.8  1
  2461      1:ord      1:ord       0.6  1
  2462      1:ord      1:ord       0.7  1
  2463      1:ord      1:ord       0.7  1
  2464      1:ord      1:ord       0.7  1
  2465      1:ord      1:ord       0.9  1
  2466      1:ord      1:ord       0.7  1
  2467      1:ord      1:ord       0.5  1
  2468      1:ord      2:dis   +   0.7  1
  2469      1:ord      1:ord       0.6  1
  2470      1:ord      1:ord       0.9  1
  2471      1:ord      1:ord       0.7  1
  2472      1:ord      1:ord       0.8  1
  2473      1:ord      1:ord       0.8  1
  2474      1:ord      1:ord       0.7  1
  2475      1:ord      1:ord       0.8  1
  2476      1:ord      1:ord       0.8  1
  2477      1:ord      1:ord       0.9  1
  2478      1:ord      1:ord       0.7  1
  2479      1:ord      1:ord       0.9  1
  2480      1:ord      1:ord       0.8  1
  2481      1:ord      1:ord       1  1
  2482      1:ord      1:ord       0.8  1
  2483      1:ord      1:ord       0.6  1
  2484      1:ord      1:ord       0.6  1
  2485      1:ord      1:ord       0.7  1
  2486      1:ord      1:ord       0.8  1
  2487      1:ord      1:ord       0.7  1
  2488      1:ord      1:ord       0.8  1
  2489      1:ord      1:ord       0.8  1
  2490      1:ord      1:ord       0.5  1
  2491      1:ord      1:ord       0.8  1
  2492      1:ord      1:ord       0.5  1
  2493      1:ord      1:ord       0.8  1
  2494      1:ord      1:ord       0.8  1
  2495      1:ord      1:ord       0.8  1
  2496      1:ord      1:ord       0.7  1
  2497      1:ord      1:ord       0.9  1
  2498      1:ord      1:ord       0.8  1
  2499      1:ord      1:ord       0.5  1
  2500      1:ord      1:ord       0.9  1
  2501      1:ord      1:ord       0.7  1
  2502      1:ord      1:ord       0.7  1
  2503      1:ord      1:ord       0.7  1
  2504      1:ord      1:ord       0.6  1
  2505      1:ord      2:dis   +   0.6  1
  2506      1:ord      1:ord       1  1
  2507      1:ord      1:ord       0.7  1
  2508      1:ord      1:ord       0.7  1
  2509      1:ord      1:ord       0.7  1
  2510      1:ord      1:ord       0.5  1
  2511      1:ord      1:ord       0.7  1
  2512      1:ord      1:ord       0.5  1
  2513      1:ord      1:ord       0.5  1
  2514      1:ord      1:ord       0.7  1
  2515      1:ord      1:ord       0.5  1
  2516      1:ord      1:ord       0.6  1
  2517      1:ord      1:ord       0.9  1
  2518      1:ord      1:ord       0.5  1
  2519      1:ord      1:ord       0.7  1
  2520      1:ord      1:ord       0.6  1
  2521      1:ord      1:ord       0.6  1
  2522      1:ord      2:dis   +   0.6  1
  2523      1:ord      1:ord       0.8  1
  2524      1:ord      1:ord       0.9  1
  2525      1:ord      1:ord       0.5  1
  2526      1:ord      1:ord       0.8  1
  2527      1:ord      2:dis   +   0.7  1
  2528      1:ord      2:dis   +   0.6  1
  2529      1:ord      2:dis   +   0.6  1
  2530      1:ord      1:ord       0.6  1
  2531      1:ord      1:ord       0.7  1
  2532      1:ord      1:ord       0.7  1
  2533      1:ord      2:dis   +   0.6  1
  2534      1:ord      1:ord       0.8  1
  2535      1:ord      1:ord       0.9  1
  2536      1:ord      1:ord       0.8  1
  2537      1:ord      1:ord       0.7  1
  2538      1:ord      1:ord       0.8  1
  2539      1:ord      1:ord       0.8  1
  2540      1:ord      1:ord       0.9  1
  2541      1:ord      1:ord       0.7  1
  2542      1:ord      2:dis   +   0.6  1
  2543      1:ord      1:ord       0.6  1
  2544      1:ord      1:ord       0.8  1
  2545      1:ord      1:ord       1  1
  2546      1:ord      1:ord       0.8  1
  2547      1:ord      1:ord       0.8  1
  2548      1:ord      1:ord       0.6  1
  2549      1:ord      1:ord       0.6  1
  2550      1:ord      1:ord       0.7  1
  2551      1:ord      1:ord       0.8  1
  2552      1:ord      1:ord       0.9  1
  2553      1:ord      1:ord       0.7  1
  2554      1:ord      1:ord       0.5  1
  2555      1:ord      1:ord       0.6  1
  2556      1:ord      1:ord       0.6  1
  2557      1:ord      1:ord       0.7  1
  2558      1:ord      1:ord       0.7  1
  2559      1:ord      1:ord       0.7  1
  2560      1:ord      1:ord       0.7  1
  2561      1:ord      2:dis   +   0.6  1
  2562      1:ord      1:ord       1  1
  2563      1:ord      1:ord       0.7  1
  2564      1:ord      1:ord       0.5  1
  2565      1:ord      1:ord       0.9  1
  2566      1:ord      1:ord       0.5  1
  2567      1:ord      1:ord       0.9  1
  2568      1:ord      1:ord       0.5  1
  2569      1:ord      1:ord       0.8  1
  2570      1:ord      1:ord       0.9  1
  2571      1:ord      1:ord       1  1
  2572      1:ord      1:ord       0.9  1
  2573      1:ord      1:ord       0.7  1
  2574      1:ord      1:ord       0.8  1
  2575      1:ord      1:ord       0.7  1
  2576      1:ord      1:ord       0.8  1
  2577      1:ord      1:ord       0.8  1
  2578      1:ord      1:ord       0.7  1
  2579      1:ord      1:ord       0.8  1
  2580      1:ord      1:ord       0.7  1
  2581      1:ord      1:ord       0.7  1
  2582      1:ord      1:ord       0.9  1
  2583      1:ord      1:ord       0.7  1
  2584      1:ord      1:ord       0.9  1
  2585      1:ord      1:ord       0.8  1
  2586      1:ord      1:ord       1  1
  2587      1:ord      1:ord       0.8  1
  2588      1:ord      1:ord       0.8  1
  2589      1:ord      1:ord       0.7  1
  2590      1:ord      1:ord       0.7  1
  2591      1:ord      1:ord       0.9  1
  2592      1:ord      1:ord       0.6  1
  2593      1:ord      1:ord       1  1
  2594      1:ord      1:ord       0.6  1
  2595      1:ord      1:ord       0.8  1
  2596      1:ord      1:ord       0.6  1
  2597      1:ord      1:ord       0.8  1
  2598      1:ord      1:ord       0.8  1
  2599      1:ord      1:ord       0.8  1
  2600      1:ord      1:ord       0.6  1
  2601      1:ord      1:ord       0.7  1
  2602      1:ord      1:ord       0.8  1
  2603      1:ord      1:ord       0.8  1
  2604      1:ord      1:ord       0.7  1
  2605      1:ord      1:ord       1  1
  2606      1:ord      1:ord       0.8  1
  2607      1:ord      1:ord       0.8  1
  2608      1:ord      1:ord       0.7  1
  2609      1:ord      1:ord       0.7  1
  2610      1:ord      1:ord       0.7  1
  2611      1:ord      1:ord       0.6  1
  2612      1:ord      1:ord       0.6  1
  2613      1:ord      1:ord       0.7  1
  2614      1:ord      1:ord       0.8  1
  2615      1:ord      2:dis   +   0.6  1
  2616      1:ord      1:ord       0.8  1
  2617      1:ord      1:ord       0.7  1
  2618      1:ord      1:ord       0.7  1
  2619      1:ord      1:ord       0.8  1
  2620      1:ord      1:ord       0.6  1
  2621      1:ord      1:ord       0.8  1
  2622      1:ord      1:ord       0.6  1
  2623      1:ord      1:ord       0.7  1
  2624      1:ord      1:ord       0.7  1
  2625      1:ord      1:ord       0.9  1
  2626      1:ord      1:ord       0.8  1
  2627      1:ord      1:ord       0.7  1
  2628      1:ord      2:dis   +   0.7  1
  2629      1:ord      1:ord       0.6  1
  2630      1:ord      1:ord       0.6  1
  2631      1:ord      1:ord       0.6  1
  2632      1:ord      2:dis   +   0.6  1
  2633      1:ord      2:dis   +   0.7  1
  2634      1:ord      1:ord       0.7  1
  2635      1:ord      1:ord       0.6  1
  2636      1:ord      2:dis   +   0.7  1
  2637      1:ord      2:dis   +   0.6  1
  2638      1:ord      1:ord       0.6  1
  2639      1:ord      2:dis   +   0.6  1
  2640      1:ord      2:dis   +   0.6  1
  2641      1:ord      1:ord       0.7  1
  2642      1:ord      2:dis   +   0.7  1
  2643      1:ord      1:ord       0.7  1
  2644      1:ord      1:ord       0.5  1
  2645      1:ord      1:ord       0.5  1
  2646      1:ord      1:ord       0.5  1
  2647      1:ord      2:dis   +   0.7  1
  2648      1:ord      1:ord       0.6  1
  2649      1:ord      2:dis   +   0.6  1
  2650      1:ord      2:dis   +   0.6  1
  2651      1:ord      1:ord       0.7  1
  2652      1:ord      2:dis   +   0.6  1
  2653      1:ord      1:ord       0.8  1
  2654      1:ord      1:ord       0.7  1
  2655      1:ord      2:dis   +   0.6  1
  2656      1:ord      1:ord       0.7  1
  2657      1:ord      1:ord       0.5  1
  2658      1:ord      1:ord       0.6  1
  2659      1:ord      1:ord       0.5  1
  2660      1:ord      1:ord       0.7  1
  2661      1:ord      1:ord       0.5  1
  2662      1:ord      1:ord       0.5  1
  2663      1:ord      1:ord       0.7  1
  2664      1:ord      1:ord       0.5  1
  2665      1:ord      1:ord       0.7  1
  2666      1:ord      1:ord       0.6  1
  2667      1:ord      1:ord       0.6  1
  2668      1:ord      1:ord       0.7  1
  2669      1:ord      1:ord       0.8  1
  2670      1:ord      1:ord       0.5  1
  2671      1:ord      1:ord       0.9  1
  2672      1:ord      1:ord       0.6  1
  2673      1:ord      1:ord       0.7  1
  2674      1:ord      1:ord       0.5  1
  2675      1:ord      1:ord       0.9  1
  2676      1:ord      2:dis   +   0.7  1
  2677      1:ord      1:ord       0.6  1
  2678      1:ord      1:ord       0.8  1
  2679      1:ord      1:ord       0.7  1
  2680      1:ord      1:ord       0.7  1
  2681      1:ord      1:ord       0.5  1
  2682      1:ord      1:ord       0.6  1
  2683      1:ord      1:ord       0.6  1
  2684      1:ord      1:ord       0.7  1
  2685      1:ord      1:ord       0.5  1
  2686      1:ord      1:ord       0.7  1
  2687      1:ord      1:ord       0.6  1
  2688      1:ord      1:ord       0.7  1
  2689      1:ord      1:ord       0.6  1
  2690      1:ord      1:ord       0.6  1
  2691      1:ord      1:ord       0.7  1
  2692      1:ord      1:ord       0.5  1
  2693      1:ord      1:ord       0.6  1
  2694      1:ord      1:ord       0.7  1
  2695      1:ord      1:ord       0.6  1
  2696      1:ord      1:ord       0.5  1
  2697      1:ord      1:ord       0.5  1
  2698      1:ord      1:ord       0.5  1
  2699      1:ord      1:ord       0.6  1
  2700      1:ord      2:dis   +   0.7  1
  2701      1:ord      2:dis   +   0.6  1
  2702      1:ord      2:dis   +   0.6  1
  2703      1:ord      1:ord       0.5  1
  2704      1:ord      1:ord       0.5  1
  2705      1:ord      2:dis   +   0.6  1
  2706      1:ord      1:ord       0.7  1
  2707      1:ord      1:ord       0.8  1
  2708      1:ord      2:dis   +   0.7  1
  2709      1:ord      1:ord       0.8  1
  2710      1:ord      1:ord       0.7  1
  2711      1:ord      2:dis   +   0.7  1
  2712      1:ord      1:ord       0.6  1
  2713      1:ord      1:ord       0.5  1
  2714      1:ord      1:ord       0.6  1
  2715      1:ord      1:ord       0.5  1
  2716      1:ord      1:ord       0.9  1
  2717      1:ord      1:ord       0.7  1
  2718      1:ord      2:dis   +   0.6  1
  2719      1:ord      1:ord       0.7  1
  2720      1:ord      1:ord       0.8  1
  2721      1:ord      1:ord       0.5  1
  2722      1:ord      1:ord       0.7  1
  2723      1:ord      1:ord       0.8  1
  2724      1:ord      1:ord       0.5  1
  2725      1:ord      1:ord       0.5  1
  2726      1:ord      1:ord       0.6  1
  2727      1:ord      1:ord       0.7  1
  2728      1:ord      1:ord       0.6  1
  2729      1:ord      1:ord       0.5  1
  2730      1:ord      1:ord       0.7  1
  2731      1:ord      1:ord       0.7  1
  2732      1:ord      1:ord       0.5  1
  2733      1:ord      1:ord       0.6  1
  2734      1:ord      1:ord       0.6  1
  2735      1:ord      1:ord       0.5  1
  2736      1:ord      1:ord       0.9  1
  2737      1:ord      2:dis   +   0.6  1
  2738      1:ord      1:ord       0.5  1
  2739      1:ord      1:ord       0.5  1
  2740      1:ord      1:ord       0.5  1
  2741      1:ord      1:ord       0.6  1
  2742      1:ord      1:ord       0.8  1
  2743      1:ord      1:ord       0.5  1
  2744      1:ord      1:ord       0.8  1
  2745      1:ord      2:dis   +   0.6  1
  2746      1:ord      1:ord       0.7  1
  2747      1:ord      1:ord       0.6  1
  2748      1:ord      1:ord       0.7  1
  2749      1:ord      1:ord       0.5  1
  2750      1:ord      1:ord       0.7  1
  2751      1:ord      1:ord       0.6  1
  2752      1:ord      1:ord       0.5  1
  2753      1:ord      1:ord       0.9  1
  2754      1:ord      1:ord       0.8  1
  2755      1:ord      1:ord       0.9  1
  2756      1:ord      1:ord       0.6  1
  2757      1:ord      1:ord       0.8  1
  2758      1:ord      1:ord       0.6  1
  2759      1:ord      1:ord       0.7  1
  2760      1:ord      1:ord       0.5  1
  2761      1:ord      1:ord       0.7  1
  2762      1:ord      1:ord       0.7  1
  2763      1:ord      1:ord       0.7  1
  2764      1:ord      1:ord       0.8  1
  2765      1:ord      1:ord       0.8  1
  2766      1:ord      1:ord       0.6  1
  2767      1:ord      1:ord       0.8  1
  2768      1:ord      2:dis   +   0.6  1
  2769      1:ord      1:ord       0.8  1
  2770      1:ord      1:ord       0.5  1
  2771      1:ord      2:dis   +   0.6  1
  2772      1:ord      1:ord       0.8  1
  2773      1:ord      1:ord       0.7  1
  2774      1:ord      1:ord       0.7  1
  2775      1:ord      1:ord       0.8  1
  2776      1:ord      1:ord       0.7  1
  2777      1:ord      1:ord       0.8  1
  2778      1:ord      1:ord       0.8  1
  2779      1:ord      1:ord       0.6  1
  2780      1:ord      1:ord       0.7  1
  2781      1:ord      1:ord       0.7  1
  2782      1:ord      1:ord       0.9  1
  2783      1:ord      1:ord       0.9  1
  2784      1:ord      1:ord       0.6  1
  2785      1:ord      1:ord       0.5  1
  2786      1:ord      2:dis   +   0.6  1
  2787      1:ord      1:ord       0.6  1
  2788      1:ord      1:ord       0.7  1
  2789      1:ord      1:ord       0.6  1
  2790      1:ord      1:ord       0.9  1
  2791      1:ord      1:ord       0.5  1
  2792      1:ord      1:ord       0.9  1
  2793      1:ord      1:ord       0.5  1
  2794      1:ord      1:ord       0.5  1
  2795      1:ord      1:ord       0.5  1
  2796      1:ord      1:ord       0.6  1
  2797      1:ord      1:ord       0.6  1
  2798      1:ord      1:ord       0.9  1
  2799      1:ord      1:ord       0.7  1
  2800      1:ord      1:ord       0.6  1
  2801      1:ord      1:ord       0.7  1
  2802      1:ord      1:ord       1  1
  2803      1:ord      1:ord       0.9  1
  2804      1:ord      1:ord       0.8  1
  2805      1:ord      1:ord       0.7  1
  2806      1:ord      1:ord       0.7  1
  2807      1:ord      1:ord       0.8  1
  2808      1:ord      1:ord       0.7  1
  2809      1:ord      1:ord       0.8  1
  2810      1:ord      1:ord       0.8  1
  2811      1:ord      1:ord       0.6  1
  2812      1:ord      1:ord       0.7  1
  2813      1:ord      1:ord       0.8  1
  2814      1:ord      1:ord       0.8  1
  2815      1:ord      1:ord       0.7  1
  2816      1:ord      1:ord       0.7  1
  2817      1:ord      1:ord       0.9  1
  2818      1:ord      1:ord       0.9  1
  2819      1:ord      1:ord       0.8  1
  2820      1:ord      1:ord       0.6  1
  2821      1:ord      2:dis   +   0.6  1
  2822      1:ord      1:ord       0.6  1
  2823      1:ord      1:ord       0.6  1
  2824      1:ord      1:ord       0.8  1
  2825      1:ord      1:ord       0.7  1
  2826      1:ord      1:ord       0.5  1
  2827      1:ord      1:ord       0.6  1
  2828      1:ord      1:ord       0.7  1
  2829      1:ord      2:dis   +   0.6  1
  2830      1:ord      1:ord       0.8  1
  2831      1:ord      1:ord       0.5  1
  2832      1:ord      1:ord       0.6  1
  2833      1:ord      2:dis   +   0.7  1
  2834      1:ord      1:ord       0.5  1
  2835      1:ord      1:ord       0.5  1
  2836      1:ord      2:dis   +   0.6  1
  2837      1:ord      2:dis   +   0.7  1
  2838      1:ord      2:dis   +   0.7  1
  2839      1:ord      1:ord       0.7  1
  2840      1:ord      2:dis   +   0.8  1
  2841      1:ord      2:dis   +   0.6  1
  2842      1:ord      2:dis   +   0.55  1
  2843      1:ord      1:ord       0.7  1
  2844      1:ord      2:dis   +   0.7  1
  2845      1:ord      1:ord       0.7  1
  2846      1:ord      2:dis   +   0.6  1
  2847      1:ord      1:ord       0.6  1
  2848      1:ord      1:ord       0.8  1
  2849      1:ord      2:dis   +   0.6  1
  2850      1:ord      1:ord       0.5  1
  2851      1:ord      2:dis   +   0.6  1
  2852      1:ord      2:dis   +   0.6  1
  2853      1:ord      1:ord       0.5  1
  2854      1:ord      1:ord       0.7  1
  2855      1:ord      2:dis   +   0.6  1
  2856      1:ord      1:ord       0.7  1
  2857      1:ord      1:ord       0.7  1
  2858      1:ord      1:ord       0.7  1
  2859      1:ord      1:ord       0.7  1
  2860      1:ord      1:ord       0.7  1
  2861      1:ord      1:ord       0.9  1
  2862      1:ord      2:dis   +   0.6  1
  2863      1:ord      1:ord       0.6  1
  2864      1:ord      2:dis   +   0.6  1
  2865      1:ord      1:ord       0.8  1
  2866      1:ord      1:ord       0.5  1
  2867      1:ord      2:dis   +   0.7  1
  2868      1:ord      2:dis   +   0.6  1
  2869      1:ord      1:ord       0.6  1
  2870      1:ord      1:ord       0.7  1
  2871      1:ord      1:ord       0.9  1
  2872      1:ord      1:ord       0.8  1
  2873      1:ord      1:ord       0.7  1
  2874      1:ord      1:ord       0.5  1
  2875      1:ord      1:ord       0.6  1
  2876      1:ord      1:ord       0.7  1
  2877      1:ord      1:ord       0.6  1
  2878      1:ord      1:ord       0.5  1
  2879      1:ord      1:ord       0.7  1
  2880      1:ord      1:ord       0.6  1
  2881      1:ord      1:ord       0.7  1
  2882      1:ord      1:ord       0.8  1
  2883      1:ord      1:ord       0.7  1
  2884      1:ord      1:ord       0.6  1
  2885      1:ord      1:ord       0.8  1
  2886      1:ord      1:ord       0.7  1
  2887      1:ord      1:ord       0.9  1
  2888      1:ord      1:ord       0.7  1
  2889      1:ord      1:ord       0.7  1
  2890      1:ord      1:ord       0.9  1
  2891      1:ord      1:ord       0.8  1
  2892      1:ord      1:ord       0.7  1
  2893      1:ord      1:ord       0.8  1
  2894      1:ord      1:ord       0.5  1
  2895      2:dis      1:ord   +   0.6  1
  2896      2:dis      1:ord   +   0.6  1
  2897      2:dis      1:ord   +   0.8  1
  2898      1:ord      1:ord       0.8  1
  2899      1:ord      1:ord       0.7  1
  2900      1:ord      2:dis   +   0.6  1
  2901      1:ord      1:ord       0.5  1
  2902      1:ord      2:dis   +   0.6  1
  2903      1:ord      1:ord       0.6  1
  2904      1:ord      1:ord       0.6  1
  2905      1:ord      1:ord       0.7  1
  2906      1:ord      2:dis   +   0.6  1
  2907      1:ord      1:ord       0.8  1
  2908      1:ord      1:ord       0.7  1
  2909      1:ord      1:ord       0.6  1
  2910      1:ord      1:ord       0.7  1
  2911      1:ord      1:ord       0.6  1
  2912      1:ord      1:ord       0.5  1
  2913      1:ord      1:ord       0.5  1
  2914      1:ord      1:ord       0.6  1
  2915      1:ord      1:ord       0.6  1
  2916      1:ord      2:dis   +   0.6  1
  2917      1:ord      1:ord       0.6  1
  2918      1:ord      1:ord       0.5  1
  2919      1:ord      1:ord       0.6  1
  2920      1:ord      1:ord       0.8  1
  2921      1:ord      1:ord       0.5  1
  2922      1:ord      1:ord       0.6  1
  2923      1:ord      1:ord       0.6  1
  2924      1:ord      1:ord       0.8  1
  2925      1:ord      2:dis   +   0.6  2
  2926      1:ord      1:ord       0.7  1
  2927      1:ord      1:ord       0.7  1
  2928      1:ord      1:ord       0.7  1
  2929      1:ord      1:ord       0.8  1
  2930      1:ord      1:ord       0.7  1
  2931      1:ord      1:ord       0.6  1
  2932      1:ord      2:dis   +   0.6  1
  2933      1:ord      1:ord       0.9  1
  2934      1:ord      2:dis   +   0.9  1
  2935      1:ord      1:ord       0.8  1
  2936      1:ord      1:ord       0.8  1
  2937      1:ord      1:ord       0.7  1
  2938      1:ord      1:ord       0.5  1
  2939      1:ord      1:ord       0.6  1
  2940      1:ord      1:ord       0.8  1
  2941      1:ord      1:ord       0.8  1
  2942      1:ord      1:ord       1  1
  2943      1:ord      1:ord       0.9  1
  2944      1:ord      1:ord       0.7  1
  2945      1:ord      1:ord       0.6  1
  2946      1:ord      1:ord       1  1
  2947      1:ord      1:ord       0.6  1
  2948      1:ord      1:ord       0.7  1
  2949      1:ord      1:ord       0.9  1
  2950      1:ord      1:ord       0.7  1
  2951      1:ord      1:ord       1  1
  2952      1:ord      1:ord       0.8  1
  2953      1:ord      1:ord       0.8  1
  2954      1:ord      1:ord       0.9  1
  2955      1:ord      1:ord       1  1
  2956      1:ord      1:ord       0.6  1
  2957      1:ord      1:ord       0.9  1
  2958      1:ord      1:ord       0.5  1
  2959      1:ord      1:ord       0.8  1
  2960      1:ord      1:ord       0.9  1
  2961      1:ord      1:ord       1  1
  2962      1:ord      1:ord       0.8  1
  2963      2:dis      2:dis       0.6  1
  2964      2:dis      1:ord   +   0.6  1
  2965      2:dis      1:ord   +   0.7  1
  2966      2:dis      1:ord   +   0.8  1
  2967      2:dis      1:ord   +   0.5  1
  2968      2:dis      1:ord   +   0.8  1
  2969      2:dis      2:dis       0.6  1
  2970      1:ord      2:dis   +   0.6  1
  2971      1:ord      1:ord       0.7  1
  2972      1:ord      2:dis   +   0.6  1
  2973      1:ord      1:ord       0.7  1
  2974      1:ord      1:ord       0.5  1
  2975      1:ord      2:dis   +   0.6  1
  2976      1:ord      1:ord       0.6  1
  2977      1:ord      1:ord       0.5  1
  2978      1:ord      1:ord       0.7  1
  2979      1:ord      1:ord       0.6  1
  2980      1:ord      1:ord       0.6  1
  2981      1:ord      1:ord       0.6  1
  2982      1:ord      1:ord       0.5  1
  2983      1:ord      2:dis   +   0.6  1
  2984      1:ord      2:dis   +   0.8  1
  2985      1:ord      1:ord       0.5  1
  2986      1:ord      1:ord       0.7  1
  2987      1:ord      2:dis   +   0.6  1
  2988      1:ord      2:dis   +   0.9  1
  2989      1:ord      2:dis   +   0.6  1
  2990      1:ord      2:dis   +   0.8  1
  2991      1:ord      1:ord       0.6  1
  2992      1:ord      1:ord       0.6  1
  2993      1:ord      2:dis   +   0.8  1
  2994      1:ord      1:ord       0.5  1
  2995      1:ord      2:dis   +   0.6  1
  2996      1:ord      2:dis   +   0.7  1
  2997      1:ord      1:ord       0.5  1
  2998      1:ord      2:dis   +   0.8  1
  2999      1:ord      1:ord       0.5  1
  3000      1:ord      1:ord       0.7  1
  3001      1:ord      2:dis   +   0.7  1
  3002      1:ord      2:dis   +   0.6  1
  3003      1:ord      1:ord       0.5  1
  3004      1:ord      1:ord       0.7  1
  3005      1:ord      2:dis   +   0.7  1
  3006      1:ord      2:dis   +   0.6  1
  3007      1:ord      1:ord       0.6  1
  3008      1:ord      2:dis   +   0.6  1
  3009      1:ord      2:dis   +   0.6  1
  3010      1:ord      1:ord       0.6  1
  3011      1:ord      1:ord       0.6  1
  3012      1:ord      1:ord       0.8  1
  3013      1:ord      1:ord       0.7  1
  3014      1:ord      1:ord       0.6  1
  3015      1:ord      1:ord       0.7  1
  3016      1:ord      1:ord       0.8  1
  3017      1:ord      1:ord       0.8  1
  3018      1:ord      1:ord       0.8  1
  3019      1:ord      1:ord       0.7  1
  3020      1:ord      1:ord       0.9  1
  3021      1:ord      1:ord       0.9  1
  3022      1:ord      1:ord       0.9  1
  3023      1:ord      1:ord       0.7  1
  3024      1:ord      1:ord       0.7  1
  3025      1:ord      1:ord       0.8  1
  3026      1:ord      1:ord       0.8  1
  3027      1:ord      1:ord       0.8  1
  3028      2:dis      1:ord   +   0.8  1
  3029      2:dis      1:ord   +   0.6  1
  3030      2:dis      2:dis       0.6  2
  3031      2:dis      2:dis       0.6  2
  3032      2:dis      2:dis       0.65  2
  3033      2:dis      2:dis       0.7  2
  3034      2:dis      2:dis       0.6  2
  3035      2:dis      2:dis       0.9  2
  3036      2:dis      2:dis       0.9  2
  3037      2:dis      2:dis       0.7  2
  3038      2:dis      1:ord   +   0.5  2
  3039      2:dis      2:dis       0.6  2
  3040      1:ord      2:dis   +   0.6  2
  3041      1:ord      1:ord       0.5  2
  3042      1:ord      1:ord       0.6  2
  3043      1:ord      1:ord       0.6  2
  3044      1:ord      2:dis   +   0.7  2
  3045      1:ord      1:ord       0.6  2
  3046      1:ord      1:ord       0.8  2
  3047      1:ord      1:ord       0.6  2
  3048      1:ord      2:dis   +   0.6  2
  3049      1:ord      1:ord       0.7  1
  3050      1:ord      1:ord       0.8  1
  3051      1:ord      1:ord       0.7  1
  3052      1:ord      1:ord       0.6  1
  3053      1:ord      2:dis   +   0.6  1
  3054      1:ord      2:dis   +   0.7  1
  3055      1:ord      2:dis   +   0.6  1
  3056      1:ord      1:ord       0.6  1
  3057      1:ord      2:dis   +   0.7  1
  3058      1:ord      2:dis   +   0.7  1
  3059      1:ord      1:ord       0.5  1
  3060      1:ord      2:dis   +   0.6  1
  3061      1:ord      2:dis   +   0.8  1
  3062      1:ord      2:dis   +   0.8  1
  3063      1:ord      2:dis   +   0.8  1
  3064      1:ord      1:ord       0.6  1
  3065      1:ord      2:dis   +   0.6  1
  3066      1:ord      2:dis   +   0.7  1
  3067      1:ord      2:dis   +   0.6  1
  3068      1:ord      1:ord       0.5  1
  3069      1:ord      1:ord       0.5  1
  3070      1:ord      2:dis   +   0.7  2
  3071      1:ord      2:dis   +   0.6  2
  3072      1:ord      2:dis   +   0.7  2
  3073      1:ord      2:dis   +   0.7  2
  3074      1:ord      2:dis   +   0.7  2
  3075      1:ord      2:dis   +   0.6  2
  3076      1:ord      2:dis   +   0.7  2
  3077      1:ord      1:ord       0.5  1
  3078      1:ord      1:ord       0.5  1
  3079      1:ord      1:ord       0.6  1
  3080      1:ord      1:ord       0.5  1
  3081      1:ord      2:dis   +   0.6  1
  3082      1:ord      2:dis   +   0.6  1
  3083      1:ord      1:ord       0.8  1
  3084      1:ord      1:ord       0.8  1
  3085      1:ord      1:ord       0.5  1
  3086      1:ord      1:ord       0.6  1
  3087      1:ord      1:ord       0.7  1
  3088      1:ord      2:dis   +   0.7  1
  3089      1:ord      1:ord       0.5  1
  3090      1:ord      1:ord       0.7  1
  3091      1:ord      1:ord       0.8  1
  3092      1:ord      1:ord       0.7  1
  3093      1:ord      1:ord       0.6  1
  3094      1:ord      1:ord       0.8  1
  3095      1:ord      1:ord       0.7  1
  3096      1:ord      1:ord       0.7  1
  3097      1:ord      1:ord       0.8  1
  3098      1:ord      1:ord       0.6  1
  3099      1:ord      1:ord       0.8  1
  3100      1:ord      1:ord       0.9  1
  3101      1:ord      1:ord       0.7  1
  3102      1:ord      1:ord       0.8  1
  3103      1:ord      1:ord       0.5  1
  3104      1:ord      1:ord       0.6  1
  3105      1:ord      1:ord       0.8  1
  3106      1:ord      1:ord       0.7  1
  3107      1:ord      2:dis   +   0.7  1
  3108      1:ord      1:ord       0.7  1
  3109      1:ord      1:ord       0.7  1
  3110      1:ord      1:ord       0.9  1
  3111      1:ord      1:ord       0.9  1
  3112      1:ord      1:ord       0.7  1
  3113      1:ord      1:ord       0.5  1
  3114      1:ord      1:ord       0.5  1
  3115      1:ord      1:ord       0.5  1
  3116      1:ord      1:ord       0.6  1
  3117      1:ord      1:ord       0.6  1
  3118      1:ord      1:ord       0.8  1
  3119      1:ord      1:ord       0.6  1
  3120      1:ord      1:ord       0.7  1
  3121      1:ord      2:dis   +   0.6  1
  3122      1:ord      1:ord       0.6  1
  3123      1:ord      1:ord       0.7  1
  3124      1:ord      1:ord       0.8  1
  3125      1:ord      1:ord       0.5  1
  3126      1:ord      1:ord       0.6  1
  3127      1:ord      1:ord       0.6  1
  3128      1:ord      1:ord       0.9  1
  3129      1:ord      1:ord       0.8  1
  3130      1:ord      1:ord       0.6  1
  3131      1:ord      2:dis   +   0.6  1
  3132      1:ord      1:ord       0.5  1
  3133      1:ord      2:dis   +   0.6  1
  3134      1:ord      2:dis   +   0.6  1
  3135      1:ord      1:ord       0.8  1
  3136      1:ord      1:ord       0.5  1
  3137      1:ord      1:ord       0.5  1
  3138      1:ord      1:ord       0.5  1
  3139      1:ord      1:ord       0.8  1
  3140      1:ord      2:dis   +   0.8  1
  3141      1:ord      1:ord       0.6  1
  3142      1:ord      1:ord       1  1
  3143      1:ord      1:ord       0.7  1
  3144      1:ord      1:ord       0.5  1
  3145      1:ord      1:ord       0.7  1
  3146      1:ord      1:ord       0.8  1
  3147      1:ord      1:ord       0.9  1
  3148      1:ord      1:ord       0.6  1
  3149      1:ord      1:ord       0.7  1
  3150      1:ord      1:ord       0.7  1
  3151      1:ord      1:ord       0.8  1
  3152      1:ord      1:ord       0.9  1
  3153      1:ord      1:ord       0.5  1
  3154      1:ord      1:ord       0.9  1
  3155      1:ord      1:ord       0.7  1
  3156      1:ord      2:dis   +   0.6  1
  3157      1:ord      1:ord       0.7  1
  3158      1:ord      1:ord       0.7  1
  3159      1:ord      1:ord       0.5  1
  3160      1:ord      1:ord       0.9  1
  3161      1:ord      1:ord       0.8  1
  3162      1:ord      1:ord       0.9  1
  3163      1:ord      1:ord       0.9  1
  3164      1:ord      1:ord       0.6  1
  3165      1:ord      1:ord       0.5  1
  3166      1:ord      1:ord       0.7  1
  3167      1:ord      1:ord       0.6  1
  3168      1:ord      1:ord       0.6  1
  3169      1:ord      1:ord       0.5  1
  3170      1:ord      1:ord       0.5  1
  3171      1:ord      2:dis   +   0.6  1
  3172      1:ord      1:ord       0.5  1
  3173      1:ord      1:ord       0.6  1
  3174      1:ord      1:ord       0.5  1
  3175      1:ord      1:ord       0.5  1
  3176      1:ord      1:ord       0.6  1
  3177      1:ord      1:ord       0.6  1
  3178      1:ord      2:dis   +   0.7  1
  3179      1:ord      2:dis   +   0.6  1
  3180      1:ord      2:dis   +   0.6  1
  3181      1:ord      1:ord       0.5  1
  3182      1:ord      2:dis   +   0.9  1
  3183      1:ord      1:ord       0.9  1
  3184      1:ord      2:dis   +   0.7  2
  3185      1:ord      2:dis   +   0.7  2
  3186      1:ord      2:dis   +   0.9  2
  3187      1:ord      2:dis   +   0.8  2
  3188      1:ord      2:dis   +   0.8  2
  3189      1:ord      2:dis   +   0.7  2
  3190      1:ord      1:ord       0.5  2
  3191      1:ord      1:ord       0.5  2
  3192      1:ord      1:ord       0.8  2
  3193      1:ord      2:dis   +   0.6  2
  3194      1:ord      2:dis   +   0.7  2
  3195      1:ord      2:dis   +   0.6  2
  3196      1:ord      1:ord       0.5  1
  3197      1:ord      1:ord       0.6  1
  3198      1:ord      1:ord       0.5  1
  3199      1:ord      1:ord       0.5  1
  3200      1:ord      2:dis   +   0.9  1
  3201      1:ord      1:ord       0.7  1
  3202      1:ord      1:ord       0.7  1
  3203      1:ord      1:ord       0.5  1
  3204      1:ord      2:dis   +   0.7  1
  3205      1:ord      1:ord       0.8  1
  3206      1:ord      1:ord       0.6  1
  3207      1:ord      1:ord       0.6  1
  3208      1:ord      1:ord       0.5  1
  3209      1:ord      1:ord       0.7  1
  3210      1:ord      2:dis   +   0.6  1
  3211      1:ord      1:ord       0.5  1
  3212      1:ord      1:ord       0.6  1
  3213      1:ord      2:dis   +   0.8  1
  3214      1:ord      1:ord       0.6  1
  3215      1:ord      1:ord       0.6  1
  3216      1:ord      2:dis   +   0.6  1
  3217      1:ord      1:ord       0.8  1
  3218      1:ord      1:ord       0.6  1
  3219      1:ord      1:ord       0.7  1
  3220      1:ord      1:ord       0.6  1
  3221      1:ord      1:ord       0.6  1
  3222      1:ord      1:ord       0.7  1
  3223      1:ord      1:ord       0.7  1
  3224      1:ord      1:ord       0.7  1
  3225      1:ord      1:ord       0.6  1
  3226      1:ord      1:ord       0.9  1
  3227      1:ord      1:ord       0.8  1
  3228      1:ord      1:ord       0.8  1
  3229      1:ord      1:ord       0.5  1
  3230      1:ord      1:ord       0.8  1
  3231      1:ord      1:ord       0.6  1
  3232      1:ord      1:ord       0.6  1
  3233      1:ord      1:ord       0.7  1
  3234      1:ord      2:dis   +   0.6  1
  3235      1:ord      2:dis   +   0.6  1
  3236      1:ord      2:dis   +   0.6  1
  3237      1:ord      1:ord       0.5  1
  3238      1:ord      1:ord       0.6  1
  3239      1:ord      1:ord       0.8  1
  3240      1:ord      1:ord       0.6  1
  3241      1:ord      1:ord       0.6  1
  3242      1:ord      2:dis   +   0.6  1
  3243      1:ord      1:ord       0.8  1
  3244      1:ord      1:ord       0.6  1
  3245      1:ord      1:ord       0.7  1
  3246      1:ord      2:dis   +   0.6  1
  3247      1:ord      1:ord       0.6  1
  3248      1:ord      1:ord       0.5  1
  3249      1:ord      1:ord       0.7  1
  3250      1:ord      1:ord       0.7  1
  3251      1:ord      1:ord       0.5  1
  3252      1:ord      1:ord       0.7  1
  3253      1:ord      1:ord       0.5  1
  3254      1:ord      1:ord       0.7  1
  3255      1:ord      1:ord       0.6  1
  3256      1:ord      1:ord       0.5  1
  3257      1:ord      1:ord       0.9  1
  3258      1:ord      2:dis   +   0.6  1
  3259      1:ord      2:dis   +   0.6  1
  3260      1:ord      1:ord       0.6  1
  3261      1:ord      2:dis   +   0.8  1
  3262      1:ord      1:ord       0.5  1
  3263      1:ord      2:dis   +   0.7  1
  3264      1:ord      1:ord       0.7  1
  3265      1:ord      1:ord       0.6  1
  3266      1:ord      1:ord       0.5  1
  3267      1:ord      1:ord       0.8  1
  3268      1:ord      1:ord       0.5  1
  3269      1:ord      1:ord       0.6  1
  3270      1:ord      1:ord       0.7  1
  3271      1:ord      1:ord       0.9  1
  3272      1:ord      1:ord       0.8  1
  3273      1:ord      1:ord       0.7  1
  3274      1:ord      1:ord       0.7  1
  3275      1:ord      1:ord       0.9  1
  3276      1:ord      1:ord       0.8  1
  3277      1:ord      1:ord       1  1
  3278      1:ord      1:ord       0.8  1
  3279      1:ord      1:ord       0.9  1
  3280      1:ord      2:dis   +   0.6  1
  3281      1:ord      1:ord       1  1
  3282      1:ord      1:ord       0.5  1
  3283      1:ord      1:ord       0.7  1
  3284      1:ord      1:ord       0.7  1
  3285      1:ord      1:ord       0.6  1
  3286      1:ord      1:ord       0.7  1
  3287      1:ord      1:ord       0.8  1
  3288      1:ord      1:ord       0.8  1
  3289      1:ord      1:ord       0.7  1
  3290      1:ord      1:ord       0.9  1
  3291      1:ord      1:ord       0.7  1
  3292      1:ord      1:ord       0.6  1
  3293      1:ord      1:ord       0.7  1
  3294      1:ord      1:ord       0.7  1
  3295      1:ord      1:ord       0.5  1
  3296      1:ord      1:ord       0.6  1
  3297      1:ord      1:ord       0.5  1
  3298      1:ord      1:ord       0.5  1
  3299      1:ord      1:ord       0.6  1
  3300      1:ord      1:ord       0.5  1
  3301      1:ord      2:dis   +   0.6  1
  3302      1:ord      1:ord       0.7  1
  3303      1:ord      1:ord       0.7  1
  3304      1:ord      1:ord       0.8  1
  3305      1:ord      1:ord       0.8  1
  3306      1:ord      1:ord       0.8  1
  3307      1:ord      1:ord       0.8  1
  3308      1:ord      1:ord       0.9  1
  3309      1:ord      1:ord       0.6  1
  3310      1:ord      1:ord       0.7  1
  3311      1:ord      1:ord       1  1
  3312      1:ord      1:ord       0.8  1
  3313      1:ord      1:ord       0.8  1
  3314      1:ord      1:ord       0.7  1
  3315      1:ord      1:ord       0.8  1
  3316      1:ord      1:ord       0.9  1
  3317      1:ord      1:ord       0.7  1
  3318      1:ord      1:ord       0.7  1
  3319      1:ord      1:ord       0.8  1
  3320      1:ord      1:ord       0.9  1
  3321      1:ord      1:ord       0.5  1
  3322      1:ord      1:ord       0.9  1
  3323      1:ord      1:ord       0.6  1
  3324      1:ord      1:ord       0.8  1
  3325      1:ord      1:ord       0.8  1
  3326      1:ord      1:ord       0.8  1
  3327      1:ord      1:ord       0.7  1
  3328      1:ord      1:ord       0.6  1
  3329      1:ord      1:ord       0.8  1
  3330      1:ord      1:ord       0.7  1
  3331      1:ord      1:ord       0.8  1
  3332      1:ord      1:ord       0.7  1
  3333      1:ord      1:ord       0.9  1
  3334      1:ord      1:ord       0.6  1
  3335      1:ord      1:ord       1  1
  3336      1:ord      1:ord       0.5  1
  3337      1:ord      1:ord       1  1
  3338      1:ord      1:ord       0.7  1
  3339      1:ord      1:ord       0.6  1
  3340      1:ord      1:ord       0.5  1
  3341      1:ord      1:ord       0.5  1
  3342      1:ord      1:ord       0.6  1
  3343      1:ord      1:ord       0.6  1
  3344      1:ord      2:dis   +   0.6  1
  3345      1:ord      1:ord       0.7  1
  3346      1:ord      1:ord       0.6  1
  3347      1:ord      1:ord       0.5  1
  3348      1:ord      1:ord       0.5  1
  3349      1:ord      1:ord       0.5  1
  3350      1:ord      1:ord       0.7  1
  3351      1:ord      1:ord       0.8  1
  3352      1:ord      1:ord       0.85  1
  3353      1:ord      1:ord       0.5  1
  3354      1:ord      1:ord       0.8  1
  3355      1:ord      1:ord       0.6  1
  3356      1:ord      1:ord       0.6  1
  3357      1:ord      1:ord       0.6  1
  3358      1:ord      1:ord       0.6  1
  3359      1:ord      1:ord       0.7  1
  3360      1:ord      1:ord       0.6  1
  3361      1:ord      2:dis   +   0.6  1
  3362      1:ord      1:ord       0.6  1
  3363      1:ord      1:ord       0.5  1
  3364      1:ord      1:ord       0.6  1
  3365      1:ord      1:ord       0.8  1
  3366      1:ord      1:ord       0.5  1
  3367      1:ord      2:dis   +   0.7  1
  3368      1:ord      2:dis   +   0.6  1
  3369      1:ord      1:ord       0.5  1
  3370      1:ord      1:ord       0.6  1
  3371      1:ord      1:ord       0.7  1
  3372      1:ord      1:ord       0.6  1
  3373      1:ord      1:ord       0.7  1
  3374      1:ord      1:ord       0.6  1
  3375      1:ord      1:ord       0.5  1
  3376      1:ord      1:ord       0.8  1
  3377      1:ord      1:ord       0.6  1
  3378      1:ord      1:ord       0.6  1
  3379      1:ord      1:ord       0.8  1
  3380      1:ord      1:ord       0.5  1
  3381      1:ord      1:ord       0.5  1
  3382      1:ord      2:dis   +   0.6  1
  3383      1:ord      1:ord       0.9  1
  3384      1:ord      2:dis   +   0.7  1
  3385      1:ord      2:dis   +   0.6  1
  3386      1:ord      1:ord       0.8  1
  3387      1:ord      2:dis   +   0.6  1
  3388      1:ord      1:ord       0.6  1
  3389      1:ord      1:ord       0.5  1
  3390      1:ord      1:ord       0.6  1
  3391      1:ord      1:ord       0.8  1
  3392      1:ord      1:ord       0.6  1
  3393      1:ord      1:ord       0.6  1
  3394      1:ord      1:ord       0.8  1
  3395      1:ord      1:ord       0.6  1
  3396      1:ord      1:ord       0.6  1
  3397      1:ord      1:ord       0.7  1
  3398      1:ord      1:ord       0.7  1
  3399      1:ord      1:ord       0.6  1
  3400      1:ord      1:ord       0.5  1
  3401      1:ord      1:ord       0.7  1
  3402      1:ord      1:ord       0.9  1
  3403      1:ord      1:ord       0.8  1
  3404      1:ord      1:ord       0.7  1
  3405      1:ord      1:ord       0.8  1
  3406      1:ord      1:ord       0.9  1
  3407      1:ord      1:ord       0.6  1
  3408      1:ord      1:ord       0.7  1
  3409      1:ord      1:ord       0.8  1
  3410      1:ord      1:ord       0.7  1
  3411      1:ord      1:ord       0.6  1
  3412      1:ord      1:ord       0.8  1
  3413      1:ord      1:ord       0.9  1
  3414      1:ord      1:ord       0.7  1
  3415      1:ord      1:ord       0.6  1
  3416      1:ord      1:ord       0.8  1
  3417      1:ord      1:ord       0.6  1
  3418      1:ord      1:ord       0.5  1
  3419      1:ord      1:ord       0.5  1
  3420      1:ord      1:ord       0.6  1
  3421      1:ord      1:ord       0.8  1
  3422      1:ord      1:ord       0.6  1
  3423      1:ord      1:ord       0.9  1
  3424      1:ord      1:ord       0.9  1
  3425      1:ord      1:ord       0.5  1
  3426      1:ord      1:ord       0.6  1
  3427      1:ord      1:ord       0.7  1
  3428      1:ord      1:ord       0.7  1
  3429      1:ord      1:ord       0.8  1
  3430      1:ord      1:ord       0.9  1
  3431      1:ord      1:ord       0.9  1
  3432      1:ord      1:ord       0.7  1
  3433      1:ord      1:ord       0.6  1
  3434      1:ord      1:ord       0.8  1
  3435      1:ord      1:ord       0.9  1
  3436      1:ord      1:ord       0.6  1
  3437      1:ord      1:ord       0.9  1
  3438      1:ord      1:ord       0.6  1
  3439      1:ord      1:ord       0.7  1
  3440      1:ord      1:ord       0.6  1
  3441      1:ord      1:ord       0.6  1
  3442      1:ord      1:ord       0.7  1
  3443      1:ord      1:ord       0.5  1
  3444      1:ord      2:dis   +   0.6  1
  3445      1:ord      1:ord       0.8  1
  3446      1:ord      1:ord       0.7  1
  3447      1:ord      1:ord       0.7  1
  3448      1:ord      1:ord       0.7  1
  3449      1:ord      1:ord       0.7  1
  3450      1:ord      1:ord       0.7  1
  3451      1:ord      1:ord       0.8  1
  3452      1:ord      1:ord       0.7  1
  3453      1:ord      1:ord       0.8  1
  3454      1:ord      1:ord       0.6  1
  3455      1:ord      1:ord       0.7  1
  3456      1:ord      1:ord       0.7  1
  3457      1:ord      1:ord       0.9  1
  3458      1:ord      1:ord       0.8  1
  3459      1:ord      1:ord       0.8  1
  3460      1:ord      1:ord       0.8  1
  3461      1:ord      1:ord       0.9  1
  3462      1:ord      1:ord       0.8  1
  3463      1:ord      1:ord       0.9  1
  3464      1:ord      1:ord       0.7  1
  3465      1:ord      1:ord       0.8  1
  3466      1:ord      1:ord       0.6  1
  3467      1:ord      1:ord       0.5  1
  3468      1:ord      1:ord       0.7  1
  3469      1:ord      1:ord       0.9  1
  3470      1:ord      1:ord       0.7  1
  3471      1:ord      1:ord       0.7  1
  3472      1:ord      1:ord       0.8  1
  3473      1:ord      1:ord       0.6  1
  3474      1:ord      1:ord       0.8  1
  3475      1:ord      1:ord       0.7  1
  3476      1:ord      1:ord       0.8  1
  3477      1:ord      1:ord       0.8  1
  3478      1:ord      1:ord       0.7  1
  3479      1:ord      1:ord       1  1
  3480      1:ord      1:ord       0.7  1
  3481      1:ord      1:ord       0.7  1
  3482      1:ord      1:ord       0.8  1
  3483      1:ord      1:ord       0.7  1
  3484      1:ord      1:ord       0.7  1
  3485      1:ord      1:ord       0.9  1
  3486      1:ord      1:ord       0.8  1
  3487      1:ord      1:ord       0.5  1
  3488      1:ord      1:ord       0.8  1
  3489      1:ord      1:ord       0.7  1
  3490      1:ord      1:ord       0.9  1
  3491      1:ord      1:ord       0.8  1
  3492      1:ord      1:ord       0.7  1
  3493      1:ord      1:ord       0.6  1
  3494      1:ord      1:ord       0.7  1
  3495      1:ord      1:ord       0.8  1
  3496      1:ord      1:ord       0.8  1
  3497      1:ord      1:ord       0.8  1
  3498      1:ord      1:ord       0.8  1
  3499      1:ord      1:ord       0.5  1
  3500      1:ord      1:ord       0.7  1
  3501      1:ord      1:ord       0.5  1
  3502      1:ord      1:ord       0.7  1
  3503      1:ord      1:ord       0.6  1
  3504      1:ord      1:ord       0.6  1
  3505      1:ord      1:ord       0.8  1
  3506      1:ord      1:ord       0.7  1
  3507      1:ord      1:ord       0.6  1
  3508      1:ord      1:ord       0.7  1
  3509      1:ord      1:ord       0.9  1
  3510      1:ord      1:ord       0.5  1
  3511      1:ord      2:dis   +   0.6  1
  3512      1:ord      1:ord       0.5  1
  3513      1:ord      1:ord       0.7  1
  3514      1:ord      1:ord       0.5  1
  3515      1:ord      1:ord       0.7  1
  3516      1:ord      1:ord       0.6  1
  3517      1:ord      1:ord       0.5  1
  3518      1:ord      1:ord       0.7  1
  3519      1:ord      1:ord       0.6  1
  3520      1:ord      2:dis   +   0.7  1
  3521      1:ord      2:dis   +   0.6  1
  3522      1:ord      2:dis   +   0.6  1
  3523      1:ord      1:ord       0.5  1
  3524      1:ord      2:dis   +   0.6  2
  3525      1:ord      2:dis   +   0.7  2
  3526      1:ord      1:ord       0.5  1
  3527      1:ord      2:dis   +   0.8  2
  3528      1:ord      1:ord       0.8  1
  3529      1:ord      1:ord       0.8  1
  3530      1:ord      1:ord       0.6  1
  3531      1:ord      1:ord       0.7  1
  3532      1:ord      1:ord       0.6  1
  3533      1:ord      1:ord       0.5  1
  3534      1:ord      1:ord       0.6  1
  3535      1:ord      1:ord       0.7  1
  3536      1:ord      1:ord       0.6  1
  3537      1:ord      1:ord       1  1
  3538      1:ord      1:ord       0.6  1
  3539      1:ord      1:ord       0.5  1
  3540      1:ord      1:ord       0.8  1
  3541      1:ord      1:ord       0.9  1
  3542      1:ord      1:ord       0.9  1
  3543      1:ord      1:ord       0.8  1
  3544      1:ord      1:ord       0.8  1
  3545      1:ord      1:ord       0.6  1
  3546      1:ord      1:ord       0.8  1
  3547      1:ord      1:ord       1  1
  3548      1:ord      1:ord       0.7  1
  3549      1:ord      1:ord       0.8  1
  3550      1:ord      1:ord       0.8  1
  3551      1:ord      1:ord       0.9  1
  3552      1:ord      1:ord       0.7  1
  3553      1:ord      1:ord       0.8  1
  3554      1:ord      1:ord       0.6  1
  3555      1:ord      1:ord       0.9  1
  3556      1:ord      1:ord       0.8  1
  3557      1:ord      1:ord       0.7  1
  3558      1:ord      1:ord       0.7  1
  3559      1:ord      1:ord       0.6  1
  3560      1:ord      1:ord       0.8  1
  3561      1:ord      1:ord       1  1
  3562      1:ord      1:ord       0.8  1
  3563      1:ord      1:ord       1  1
  3564      1:ord      1:ord       0.8  1
  3565      1:ord      1:ord       0.9  1
  3566      1:ord      1:ord       0.7  1
  3567      1:ord      2:dis   +   0.6  1
  3568      1:ord      1:ord       0.9  1
  3569      1:ord      1:ord       0.5  1
  3570      1:ord      1:ord       0.7  1
  3571      1:ord      2:dis   +   0.7  1
  3572      1:ord      2:dis   +   0.6  1
  3573      1:ord      1:ord       0.5  1
  3574      1:ord      1:ord       0.5  1
  3575      1:ord      1:ord       0.6  1
  3576      1:ord      1:ord       0.7  1
  3577      1:ord      1:ord       0.5  1
  3578      1:ord      2:dis   +   0.6  1
  3579      1:ord      2:dis   +   0.8  1
  3580      1:ord      2:dis   +   0.8  1
  3581      1:ord      2:dis   +   0.9  1
  3582      1:ord      1:ord       0.5  1
  3583      1:ord      2:dis   +   0.6  1
  3584      1:ord      2:dis   +   0.7  1
  3585      1:ord      2:dis   +   0.6  1
  3586      1:ord      2:dis   +   0.6  1
  3587      1:ord      1:ord       0.5  1
  3588      1:ord      2:dis   +   0.6  1
  3589      1:ord      1:ord       0.5  1
  3590      1:ord      2:dis   +   0.7  1
  3591      1:ord      1:ord       0.5  1
  3592      1:ord      1:ord       0.6  1
  3593      1:ord      1:ord       0.8  1
  3594      1:ord      1:ord       0.5  1
  3595      1:ord      1:ord       0.7  1
  3596      1:ord      2:dis   +   0.8  1
  3597      1:ord      1:ord       0.5  1
  3598      1:ord      2:dis   +   0.8  1
  3599      1:ord      1:ord       0.9  1
  3600      1:ord      1:ord       0.8  1
  3601      1:ord      2:dis   +   0.6  1
  3602      1:ord      1:ord       0.7  1
  3603      1:ord      1:ord       0.7  1
  3604      1:ord      2:dis   +   0.6  1
  3605      1:ord      1:ord       0.7  1
  3606      1:ord      2:dis   +   0.6  1
  3607      1:ord      1:ord       0.7  1
  3608      1:ord      1:ord       1  1
  3609      1:ord      2:dis   +   0.6  1
  3610      1:ord      1:ord       0.6  1
  3611      1:ord      1:ord       0.7  1
  3612      1:ord      1:ord       0.5  1
  3613      1:ord      1:ord       0.8  1
  3614      1:ord      1:ord       0.6  1
  3615      1:ord      1:ord       0.7  1
  3616      1:ord      1:ord       0.5  1
  3617      1:ord      1:ord       0.7  1
  3618      1:ord      1:ord       0.6  1
  3619      1:ord      1:ord       0.6  1
  3620      1:ord      1:ord       0.5  1
  3621      1:ord      1:ord       0.7  1
  3622      1:ord      1:ord       0.5  1
  3623      1:ord      2:dis   +   0.7  1
  3624      1:ord      1:ord       0.5  1
  3625      1:ord      1:ord       0.6  1
  3626      1:ord      1:ord       0.6  1
  3627      1:ord      1:ord       0.5  1
  3628      1:ord      1:ord       0.6  1
  3629      1:ord      1:ord       0.6  1
  3630      1:ord      2:dis   +   0.6  1
  3631      1:ord      1:ord       0.5  1
  3632      1:ord      1:ord       0.7  1
  3633      1:ord      1:ord       0.7  1
  3634      1:ord      1:ord       0.6  1
  3635      1:ord      1:ord       0.7  1
  3636      1:ord      1:ord       0.6  1
  3637      1:ord      1:ord       0.6  1
  3638      1:ord      1:ord       1  1
  3639      1:ord      1:ord       0.7  1
  3640      1:ord      1:ord       0.6  1
  3641      1:ord      1:ord       0.8  1
  3642      1:ord      1:ord       0.6  1
  3643      1:ord      1:ord       0.6  1
  3644      1:ord      1:ord       1  1
  3645      1:ord      1:ord       0.8  1
  3646      1:ord      1:ord       0.8  1
  3647      1:ord      1:ord       0.7  1
  3648      1:ord      1:ord       0.7  1
  3649      1:ord      1:ord       0.7  1
  3650      1:ord      1:ord       0.6  1
  3651      1:ord      1:ord       0.5  1
  3652      1:ord      2:dis   +   0.6  1
  3653      1:ord      1:ord       0.6  1
  3654      1:ord      1:ord       0.6  1
  3655      1:ord      1:ord       0.7  1
  3656      1:ord      1:ord       0.8  1
  3657      1:ord      1:ord       0.5  1
  3658      1:ord      1:ord       0.9  1
  3659      1:ord      1:ord       0.6  1
  3660      1:ord      1:ord       0.7  1
  3661      1:ord      1:ord       0.9  1
  3662      1:ord      1:ord       1  1
  3663      1:ord      1:ord       0.7  1
  3664      1:ord      2:dis   +   0.7  1
  3665      1:ord      1:ord       1  1
  3666      1:ord      1:ord       0.7  1
  3667      1:ord      1:ord       0.9  1
  3668      1:ord      1:ord       0.8  1
  3669      1:ord      1:ord       0.7  1
  3670      1:ord      2:dis   +   0.6  1
  3671      1:ord      1:ord       0.9  1
  3672      1:ord      1:ord       0.8  1
  3673      1:ord      1:ord       0.8  1
  3674      1:ord      1:ord       0.5  1
  3675      1:ord      1:ord       0.9  1
  3676      1:ord      1:ord       0.7  1
  3677      1:ord      1:ord       0.7  1
  3678      1:ord      1:ord       0.8  1
  3679      1:ord      1:ord       0.5  1
  3680      1:ord      1:ord       0.6  1
  3681      1:ord      1:ord       0.7  1
  3682      1:ord      1:ord       0.8  1
  3683      1:ord      1:ord       0.7  1
  3684      1:ord      1:ord       0.5  1
  3685      1:ord      2:dis   +   0.6  1
  3686      1:ord      2:dis   +   0.6  1
  3687      1:ord      1:ord       0.5  1
  3688      1:ord      2:dis   +   0.6  1
  3689      1:ord      1:ord       0.7  1
  3690      1:ord      1:ord       0.8  1
  3691      1:ord      2:dis   +   0.6  1
  3692      1:ord      2:dis   +   0.6  1
  3693      1:ord      1:ord       0.6  1
  3694      1:ord      1:ord       0.8  1
  3695      1:ord      1:ord       0.5  1
  3696      1:ord      1:ord       0.9  1
  3697      1:ord      1:ord       0.8  1
  3698      1:ord      1:ord       0.8  1
  3699      1:ord      1:ord       1  1
  3700      1:ord      1:ord       0.6  1
  3701      1:ord      1:ord       0.9  1
  3702      1:ord      1:ord       0.9  1
  3703      1:ord      1:ord       0.8  1
  3704      1:ord      1:ord       0.9  1
  3705      1:ord      1:ord       0.7  1
  3706      1:ord      1:ord       0.8  1
  3707      1:ord      1:ord       0.8  1
  3708      1:ord      1:ord       0.6  1
  3709      1:ord      1:ord       1  1
  3710      1:ord      1:ord       0.7  1
  3711      1:ord      1:ord       0.7  1
  3712      1:ord      2:dis   +   0.6  1
  3713      1:ord      1:ord       0.7  1
  3714      1:ord      1:ord       0.9  1
  3715      1:ord      1:ord       0.7  1
  3716      1:ord      1:ord       0.8  1
  3717      1:ord      1:ord       0.5  1
  3718      1:ord      1:ord       0.7  1
  3719      1:ord      1:ord       0.7  1
  3720      1:ord      1:ord       0.5  1
  3721      1:ord      2:dis   +   0.6  1
  3722      1:ord      1:ord       0.6  1
  3723      1:ord      1:ord       0.6  1
  3724      1:ord      1:ord       0.6  1
  3725      1:ord      1:ord       0.6  1
  3726      1:ord      1:ord       0.9  1
  3727      1:ord      1:ord       0.6  1
  3728      1:ord      1:ord       0.7  1
  3729      1:ord      1:ord       0.9  1
  3730      1:ord      1:ord       0.8  1
  3731      1:ord      1:ord       0.9  1
  3732      1:ord      1:ord       0.7  1
  3733      1:ord      1:ord       1  1
  3734      1:ord      1:ord       0.6  1
  3735      1:ord      1:ord       0.9  1
  3736      1:ord      1:ord       0.8  1
  3737      1:ord      1:ord       0.7  1
  3738      1:ord      1:ord       0.7  1
  3739      1:ord      1:ord       0.9  1
  3740      1:ord      1:ord       0.7  1
  3741      1:ord      1:ord       0.6  1
  3742      1:ord      1:ord       0.5  1
  3743      1:ord      1:ord       0.6  1
  3744      1:ord      2:dis   +   0.6  2
  3745      1:ord      2:dis   +   0.8  2
  3746      1:ord      2:dis   +   0.9  2
  3747      1:ord      2:dis   +   0.9  2
  3748      1:ord      2:dis   +   0.6  2
  3749      1:ord      2:dis   +   0.6  2
  3750      1:ord      2:dis   +   0.6  2
  3751      1:ord      2:dis   +   0.8  2
  3752      1:ord      2:dis   +   0.9  2
  3753      1:ord      2:dis   +   0.8  2
  3754      1:ord      2:dis   +   0.6  2
  3755      1:ord      1:ord       0.5  2
  3756      1:ord      1:ord       0.5  2
  3757      1:ord      2:dis   +   0.7  2
  3758      1:ord      2:dis   +   0.7  2
  3759      1:ord      2:dis   +   0.7  2
  3760      1:ord      2:dis   +   0.75  2
  3761      1:ord      2:dis   +   0.8  2
  3762      1:ord      2:dis   +   0.8  2
  3763      1:ord      2:dis   +   0.6  2
  3764      1:ord      1:ord       0.6  2
  3765      1:ord      2:dis   +   0.7  2
  3766      1:ord      2:dis   +   0.7  2
  3767      1:ord      2:dis   +   0.8  2
  3768      1:ord      2:dis   +   0.7  2
  3769      1:ord      2:dis   +   1  2
  3770      2:dis      1:ord   +   0.6  1
  3771      2:dis      2:dis       0.6  2
  3772      2:dis      2:dis       0.7  2
  3773      2:dis      2:dis       0.8  2
  3774      2:dis      2:dis       0.7  2
  3775      2:dis      2:dis       0.9  2
  3776      2:dis      2:dis       0.7  2
  3777      2:dis      2:dis       0.8  2
  3778      2:dis      2:dis       0.7  2
  3779      2:dis      2:dis       1  2
  3780      2:dis      2:dis       0.9  2
  3781      2:dis      2:dis       0.9  2
  3782      2:dis      2:dis       0.7  2
  3783      2:dis      2:dis       0.75  2
  3784      2:dis      2:dis       0.9  2
  3785      2:dis      2:dis       0.667  2
  3786      2:dis      2:dis       0.7  2
  3787      2:dis      2:dis       0.9  2
  3788      2:dis      2:dis       0.8  2
  3789      2:dis      2:dis       0.9  2
  3790      2:dis      2:dis       0.6  2
  3791      2:dis      2:dis       0.7  2
  3792      2:dis      2:dis       0.9  2
  3793      2:dis      2:dis       0.8  2
  3794      2:dis      2:dis       0.9  2
  3795      2:dis      2:dis       0.9  2
  3796      2:dis      2:dis       0.7  2
  3797      2:dis      2:dis       0.8  2
  3798      2:dis      2:dis       0.7  2
  3799      2:dis      2:dis       0.7  2
  3800      2:dis      2:dis       1  2
  3801      2:dis      2:dis       0.8  2
  3802      2:dis      2:dis       0.8  2
  3803      2:dis      2:dis       0.75  2
  3804      2:dis      2:dis       0.9  2
  3805      2:dis      2:dis       0.9  2
  3806      2:dis      2:dis       0.6  2
  3807      2:dis      2:dis       0.9  2
  3808      2:dis      2:dis       0.85  2
  3809      2:dis      2:dis       0.8  2
  3810      2:dis      2:dis       0.6  2
  3811      2:dis      2:dis       0.9  2
  3812      2:dis      2:dis       0.9  2
  3813      2:dis      2:dis       0.9  2
  3814      2:dis      2:dis       0.8  2
  3815      2:dis      2:dis       0.9  2
  3816      2:dis      2:dis       0.9  2
  3817      2:dis      2:dis       1  2
  3818      2:dis      2:dis       0.7  2
  3819      2:dis      2:dis       0.8  2
  3820      2:dis      2:dis       1  2
  3821      2:dis      2:dis       0.8  2
  3822      2:dis      2:dis       0.8  2
  3823      2:dis      2:dis       0.8  2
  3824      2:dis      2:dis       0.6  2
  3825      2:dis      2:dis       0.625  2
  3826      2:dis      2:dis       0.8  2
  3827      2:dis      2:dis       0.8  2
  3828      2:dis      2:dis       0.7  2
  3829      2:dis      2:dis       1  2
  3830      2:dis      2:dis       0.6  2
  3831      2:dis      2:dis       0.9  2
  3832      2:dis      2:dis       0.7  2
  3833      2:dis      2:dis       0.7  2
  3834      2:dis      2:dis       0.9  2
  3835      2:dis      2:dis       0.8  2
  3836      2:dis      2:dis       0.8  2
  3837      2:dis      2:dis       0.9  2
  3838      2:dis      2:dis       0.9  2
  3839      2:dis      2:dis       0.8  2
  3840      2:dis      2:dis       0.8  2
  3841      2:dis      2:dis       0.7  2
  3842      2:dis      2:dis       0.9  2
  3843      2:dis      2:dis       0.9  2
  3844      2:dis      2:dis       0.8  2
  3845      2:dis      2:dis       0.8  2
  3846      2:dis      2:dis       0.7  2
  3847      2:dis      2:dis       0.8  2
  3848      2:dis      2:dis       0.7  2
  3849      2:dis      2:dis       0.9  2
  3850      2:dis      2:dis       0.9  2
  3851      2:dis      2:dis       0.8  2
  3852      2:dis      2:dis       0.9  2
  3853      2:dis      2:dis       0.7  2
  3854      2:dis      2:dis       0.8  2
  3855      2:dis      2:dis       1  2
  3856      2:dis      2:dis       0.9  2
  3857      2:dis      2:dis       0.9  2
  3858      2:dis      2:dis       0.8  2
  3859      2:dis      2:dis       0.8  2
  3860      2:dis      2:dis       0.9  2
  3861      2:dis      2:dis       0.9  2
  3862      2:dis      2:dis       0.85  2
  3863      2:dis      2:dis       0.8  2
  3864      2:dis      1:ord   +   0.5  2
  3865      2:dis      2:dis       0.8  2
  3866      2:dis      2:dis       0.9  2
  3867      2:dis      2:dis       0.8  2
  3868      2:dis      2:dis       0.8  2
  3869      2:dis      2:dis       0.8  2
  3870      2:dis      2:dis       0.6  2
  3871      2:dis      2:dis       0.75  2
  3872      2:dis      2:dis       0.9  2
  3873      2:dis      2:dis       0.8  2
  3874      2:dis      2:dis       1  2
  3875      2:dis      2:dis       0.7  2
  3876      2:dis      2:dis       0.8  2
  3877      2:dis      2:dis       0.6  2
  3878      2:dis      2:dis       0.9  2
  3879      2:dis      2:dis       0.9  2
  3880      2:dis      2:dis       1  2
  3881      2:dis      2:dis       0.9  2
  3882      2:dis      2:dis       1  2
  3883      2:dis      2:dis       0.9  2
  3884      2:dis      2:dis       0.9  2
  3885      2:dis      2:dis       0.8  2
  3886      2:dis      2:dis       0.7  2
  3887      2:dis      2:dis       0.8  2
  3888      2:dis      2:dis       1  2
  3889      2:dis      2:dis       0.767  2
  3890      2:dis      2:dis       0.7  2
  3891      2:dis      2:dis       0.7  2
  3892      2:dis      2:dis       1  2
  3893      2:dis      2:dis       0.9  2
  3894      2:dis      2:dis       0.7  2
  3895      2:dis      2:dis       0.7  2
  3896      2:dis      2:dis       1  2
  3897      2:dis      2:dis       0.7  2
  3898      2:dis      2:dis       0.8  2
  3899      2:dis      2:dis       0.9  2
  3900      2:dis      2:dis       0.9  2
  3901      2:dis      2:dis       1  2
  3902      2:dis      2:dis       0.7  2
  3903      2:dis      2:dis       0.8  2
  3904      2:dis      2:dis       0.9  2
  3905      2:dis      2:dis       0.7  2
  3906      2:dis      1:ord   +   0.5  2
  3907      2:dis      2:dis       0.8  2
  3908      2:dis      2:dis       0.8  2
  3909      2:dis      2:dis       0.9  2
  3910      2:dis      2:dis       0.8  2
  3911      2:dis      2:dis       0.9  2
  3912      2:dis      2:dis       1  2
  3913      2:dis      2:dis       0.8  2
  3914      2:dis      2:dis       0.8  2
  3915      2:dis      2:dis       0.8  2
  3916      2:dis      2:dis       0.9  2
  3917      2:dis      2:dis       0.8  2
  3918      2:dis      2:dis       0.967  2
  3919      2:dis      2:dis       1  2
  3920      2:dis      2:dis       0.783  2
  3921      2:dis      2:dis       0.9  2
  3922      2:dis      2:dis       0.9  2
  3923      2:dis      2:dis       0.9  2
  3924      2:dis      2:dis       1  2
  3925      2:dis      2:dis       0.8  2
  3926      2:dis      2:dis       0.7  2
  3927      2:dis      2:dis       1  2
  3928      2:dis      2:dis       0.7  2
  3929      2:dis      2:dis       1  2
  3930      2:dis      2:dis       0.7  2
  3931      2:dis      2:dis       1  2
  3932      2:dis      2:dis       0.6  2
  3933      2:dis      2:dis       0.633  2
  3934      2:dis      2:dis       1  2
  3935      2:dis      2:dis       0.7  2
  3936      2:dis      2:dis       0.6  2
  3937      2:dis      2:dis       0.8  2
  3938      2:dis      2:dis       0.6  2
  3939      2:dis      2:dis       0.6  2
  3940      2:dis      2:dis       0.7  2
  3941      2:dis      2:dis       1  2
  3942      2:dis      2:dis       0.9  2
  3943      2:dis      2:dis       0.9  2
  3944      2:dis      2:dis       0.7  2
  3945      2:dis      2:dis       0.8  2
  3946      2:dis      2:dis       0.8  2
  3947      2:dis      2:dis       0.6  2
  3948      2:dis      2:dis       0.9  2
  3949      2:dis      2:dis       0.8  2
  3950      2:dis      2:dis       0.8  2
  3951      2:dis      2:dis       0.8  2
  3952      2:dis      2:dis       0.9  2
  3953      2:dis      2:dis       0.6  2
  3954      2:dis      2:dis       0.9  2
  3955      2:dis      2:dis       0.55  2
  3956      2:dis      2:dis       0.8  2
  3957      2:dis      2:dis       0.9  2
  3958      2:dis      2:dis       0.8  2
  3959      2:dis      2:dis       0.7  2
  3960      2:dis      2:dis       0.9  2
  3961      2:dis      2:dis       0.6  2
  3962      2:dis      2:dis       0.6  2
  3963      2:dis      2:dis       0.9  2
  3964      2:dis      2:dis       0.9  2
  3965      2:dis      2:dis       0.8  2
  3966      2:dis      2:dis       0.75  2
  3967      2:dis      2:dis       0.9  2
  3968      2:dis      2:dis       0.8  2
  3969      2:dis      2:dis       0.833  2
  3970      2:dis      2:dis       0.7  2
  3971      2:dis      2:dis       0.8  2
  3972      2:dis      2:dis       0.8  2
  3973      2:dis      2:dis       0.767  2
  3974      2:dis      2:dis       0.6  2
  3975      2:dis      2:dis       0.7  2
  3976      2:dis      1:ord   +   0.6  2
  3977      2:dis      2:dis       0.7  2
  3978      2:dis      2:dis       0.8  2
  3979      2:dis      2:dis       0.9  2
  3980      2:dis      2:dis       0.8  2
  3981      2:dis      2:dis       1  2
  3982      2:dis      2:dis       0.75  2
  3983      2:dis      2:dis       0.9  2
  3984      2:dis      2:dis       0.9  2
  3985      2:dis      2:dis       0.9  2
  3986      2:dis      2:dis       1  2
  3987      2:dis      2:dis       1  2
  3988      2:dis      2:dis       0.9  2
  3989      2:dis      2:dis       0.8  2
  3990      2:dis      2:dis       0.8  2
  3991      2:dis      2:dis       1  2
  3992      2:dis      2:dis       0.9  2
  3993      2:dis      2:dis       0.9  2
  3994      2:dis      2:dis       0.875  2
  3995      2:dis      2:dis       0.9  2
  3996      2:dis      2:dis       0.8  2
  3997      2:dis      2:dis       0.75  2
  3998      2:dis      2:dis       0.9  2
  3999      2:dis      2:dis       1  2
  4000      2:dis      2:dis       0.6  2
  4001      2:dis      2:dis       0.9  2
  4002      2:dis      2:dis       0.8  2
  4003      2:dis      2:dis       0.7  2
  4004      2:dis      2:dis       0.8  2
  4005      2:dis      2:dis       0.8  2
  4006      2:dis      2:dis       0.9  2
  4007      2:dis      2:dis       0.6  2
  4008      2:dis      2:dis       0.8  2
  4009      2:dis      2:dis       0.9  2
  4010      2:dis      2:dis       1  2
  4011      2:dis      2:dis       0.575  2
  4012      2:dis      2:dis       0.85  2
  4013      2:dis      2:dis       0.8  2
  4014      2:dis      2:dis       1  2
  4015      2:dis      2:dis       0.8  2
  4016      2:dis      2:dis       0.9  2
  4017      2:dis      2:dis       0.9  2
  4018      2:dis      2:dis       1  2
  4019      2:dis      2:dis       1  2
  4020      2:dis      2:dis       0.8  2
  4021      2:dis      2:dis       0.7  2
  4022      2:dis      2:dis       0.9  2
  4023      2:dis      2:dis       0.9  2
  4024      2:dis      2:dis       0.6  2
  4025      2:dis      2:dis       0.8  2
  4026      2:dis      2:dis       0.7  2
  4027      2:dis      2:dis       0.9  2
  4028      2:dis      2:dis       0.7  2
  4029      2:dis      2:dis       0.9  2
  4030      2:dis      2:dis       0.7  2
  4031      2:dis      2:dis       0.8  2
  4032      2:dis      2:dis       0.7  2
  4033      2:dis      2:dis       0.9  2
  4034      2:dis      2:dis       1  2
  4035      2:dis      2:dis       0.6  2
  4036      2:dis      2:dis       0.8  2
  4037      2:dis      2:dis       0.8  2
  4038      2:dis      2:dis       0.7  2
  4039      2:dis      2:dis       0.6  2
  4040      2:dis      2:dis       0.6  2
  4041      2:dis      2:dis       0.7  2
  4042      2:dis      2:dis       0.9  2
  4043      2:dis      2:dis       1  2
  4044      2:dis      2:dis       0.7  2
  4045      2:dis      2:dis       0.6  2
  4046      2:dis      2:dis       0.7  2
  4047      2:dis      2:dis       0.9  2
  4048      2:dis      2:dis       0.8  2
  4049      2:dis      2:dis       0.667  2
  4050      2:dis      2:dis       0.6  2
  4051      2:dis      2:dis       0.7  2
  4052      2:dis      2:dis       0.9  2
  4053      2:dis      2:dis       1  2
  4054      2:dis      2:dis       0.8  2
  4055      2:dis      2:dis       0.6  2
  4056      2:dis      2:dis       0.9  2
  4057      2:dis      2:dis       0.8  2
  4058      2:dis      2:dis       1  2
  4059      2:dis      2:dis       0.8  2
  4060      2:dis      2:dis       0.9  2
  4061      2:dis      2:dis       0.767  2
  4062      2:dis      2:dis       1  2
  4063      2:dis      2:dis       0.8  2
  4064      2:dis      2:dis       0.7  2
  4065      2:dis      2:dis       1  2
  4066      2:dis      2:dis       0.9  2
  4067      2:dis      2:dis       1  2
  4068      2:dis      2:dis       1  2
  4069      2:dis      2:dis       0.8  2
  4070      2:dis      2:dis       0.9  2
  4071      2:dis      2:dis       0.85  2
  4072      2:dis      2:dis       0.8  2
  4073      2:dis      2:dis       0.9  2
  4074      2:dis      2:dis       0.633  2
  4075      2:dis      2:dis       0.8  2
  4076      2:dis      2:dis       0.95  2
  4077      2:dis      2:dis       0.9  2
  4078      2:dis      2:dis       0.6  2
  4079      2:dis      2:dis       0.7  2
  4080      2:dis      2:dis       0.9  2
  4081      2:dis      2:dis       0.933  2
  4082      2:dis      2:dis       0.9  2
  4083      2:dis      2:dis       0.7  2
  4084      2:dis      2:dis       0.6  2
  4085      2:dis      2:dis       0.9  2
  4086      2:dis      2:dis       0.9  2
  4087      2:dis      2:dis       0.9  2
  4088      2:dis      2:dis       0.8  2
  4089      2:dis      2:dis       0.7  2
  4090      2:dis      2:dis       0.8  2
  4091      2:dis      2:dis       1  2
  4092      2:dis      2:dis       0.9  2
  4093      2:dis      2:dis       0.7  2
  4094      2:dis      2:dis       1  2
  4095      2:dis      2:dis       0.7  2
  4096      2:dis      2:dis       0.9  2
  4097      2:dis      2:dis       0.7  2
  4098      2:dis      2:dis       1  2
  4099      2:dis      2:dis       0.9  2
  4100      2:dis      2:dis       0.8  2
  4101      2:dis      2:dis       0.8  2
  4102      2:dis      2:dis       0.7  2
  4103      2:dis      1:ord   +   0.6  2
  4104      2:dis      2:dis       0.9  2
  4105      2:dis      2:dis       0.75  2
  4106      2:dis      2:dis       0.8  2
  4107      2:dis      2:dis       0.8  2
  4108      2:dis      2:dis       0.9  2
  4109      2:dis      2:dis       1  2
  4110      2:dis      2:dis       0.7  2
  4111      2:dis      2:dis       0.6  2
  4112      2:dis      2:dis       0.9  2
  4113      2:dis      2:dis       0.833  2
  4114      2:dis      2:dis       1  2
  4115      2:dis      2:dis       0.9  2
  4116      2:dis      2:dis       0.9  2
  4117      2:dis      2:dis       0.9  2
  4118      2:dis      2:dis       0.7  2
  4119      2:dis      2:dis       0.8  2
  4120      2:dis      2:dis       0.8  2
  4121      2:dis      2:dis       0.8  2
  4122      2:dis      2:dis       0.8  2
  4123      2:dis      2:dis       1  2
  4124      2:dis      2:dis       0.9  2
  4125      2:dis      2:dis       0.7  2
  4126      2:dis      2:dis       0.9  2
  4127      2:dis      2:dis       0.8  2
  4128      2:dis      2:dis       0.6  2
  4129      2:dis      2:dis       0.9  2
  4130      2:dis      2:dis       0.9  2
  4131      2:dis      2:dis       0.9  2
  4132      2:dis      2:dis       0.9  2
  4133      2:dis      2:dis       1  2
  4134      2:dis      2:dis       0.6  2
  4135      2:dis      2:dis       0.9  2
  4136      2:dis      2:dis       0.9  2
  4137      2:dis      2:dis       0.8  2
  4138      2:dis      2:dis       0.7  2
  4139      2:dis      2:dis       0.8  2
  4140      2:dis      2:dis       0.8  2
  4141      2:dis      2:dis       0.9  2
  4142      2:dis      2:dis       0.9  2
  4143      2:dis      2:dis       0.7  2
  4144      2:dis      2:dis       0.8  2
  4145      2:dis      2:dis       0.9  2
  4146      2:dis      2:dis       0.833  2
  4147      2:dis      2:dis       1  2
  4148      2:dis      2:dis       0.8  2
  4149      2:dis      2:dis       0.8  2
  4150      2:dis      2:dis       0.8  2
  4151      2:dis      2:dis       0.6  2
  4152      2:dis      2:dis       0.7  2
  4153      2:dis      2:dis       0.833  2
  4154      2:dis      2:dis       0.95  2
  4155      2:dis      2:dis       0.9  2
  4156      2:dis      2:dis       1  2
  4157      2:dis      2:dis       0.9  2
  4158      2:dis      2:dis       0.9  2
  4159      2:dis      2:dis       0.875  2
  4160      2:dis      2:dis       1  2
  4161      2:dis      2:dis       0.7  2
  4162      2:dis      2:dis       0.9  2
  4163      2:dis      2:dis       0.6  2
  4164      2:dis      2:dis       0.7  2
  4165      2:dis      2:dis       0.9  2
  4166      2:dis      2:dis       0.9  2
  4167      2:dis      2:dis       0.8  2
  4168      2:dis      2:dis       0.9  2
  4169      2:dis      1:ord   +   0.6  2
  4170      2:dis      2:dis       0.8  2
  4171      2:dis      2:dis       0.6  2
  4172      2:dis      2:dis       0.8  2
  4173      2:dis      2:dis       1  2
  4174      2:dis      2:dis       0.8  2
  4175      2:dis      2:dis       0.7  2
  4176      2:dis      2:dis       1  2
  4177      2:dis      2:dis       0.8  2
  4178      2:dis      2:dis       0.8  2
  4179      2:dis      2:dis       0.9  2
  4180      2:dis      2:dis       1  2
  4181      2:dis      2:dis       0.85  2
  4182      2:dis      2:dis       0.9  2
  4183      2:dis      2:dis       0.7  2
  4184      2:dis      2:dis       0.9  2
  4185      2:dis      2:dis       0.9  2
  4186      2:dis      2:dis       0.8  2
  4187      2:dis      2:dis       0.7  2
  4188      2:dis      2:dis       0.6  2
  4189      2:dis      2:dis       0.75  2
  4190      2:dis      2:dis       0.7  2
  4191      2:dis      2:dis       1  2
  4192      2:dis      2:dis       1  2
  4193      2:dis      2:dis       0.9  2
  4194      2:dis      2:dis       0.8  2
  4195      2:dis      2:dis       0.9  2
  4196      2:dis      2:dis       0.8  2
  4197      2:dis      2:dis       0.8  2
  4198      2:dis      2:dis       0.9  2
  4199      2:dis      2:dis       0.9  2
  4200      2:dis      1:ord   +   0.5  2
  4201      2:dis      2:dis       0.9  2
  4202      2:dis      2:dis       0.6  2
  4203      2:dis      2:dis       1  2
  4204      2:dis      2:dis       0.7  2
  4205      2:dis      2:dis       0.9  2
  4206      2:dis      2:dis       0.6  2
  4207      2:dis      2:dis       0.9  2
  4208      2:dis      2:dis       0.6  2
  4209      2:dis      2:dis       0.7  2
  4210      2:dis      2:dis       0.9  2
  4211      2:dis      2:dis       0.8  2
  4212      2:dis      2:dis       0.9  2
  4213      2:dis      2:dis       0.9  2
  4214      2:dis      2:dis       0.75  2
  4215      2:dis      2:dis       0.9  2
  4216      2:dis      2:dis       1  2
  4217      2:dis      2:dis       0.9  2
  4218      2:dis      2:dis       0.9  2
  4219      2:dis      2:dis       0.8  2
  4220      2:dis      2:dis       1  2
  4221      2:dis      2:dis       0.9  2
  4222      2:dis      2:dis       0.8  2
  4223      2:dis      2:dis       0.9  2
  4224      2:dis      2:dis       1  2
  4225      2:dis      2:dis       0.6  2
  4226      2:dis      2:dis       0.9  2
  4227      2:dis      2:dis       0.8  2
  4228      2:dis      2:dis       0.9  2
  4229      2:dis      2:dis       0.7  2
  4230      2:dis      2:dis       0.7  2
  4231      2:dis      2:dis       0.7  2
  4232      2:dis      2:dis       0.8  2
  4233      2:dis      2:dis       0.6  2
  4234      2:dis      2:dis       1  2
  4235      2:dis      2:dis       0.8  2
  4236      2:dis      2:dis       0.7  2
  4237      2:dis      2:dis       0.8  2
  4238      2:dis      2:dis       0.8  2
  4239      2:dis      2:dis       0.9  2
  4240      2:dis      2:dis       0.85  2
  4241      2:dis      2:dis       0.7  2
  4242      2:dis      2:dis       0.8  2
  4243      2:dis      2:dis       0.8  2
  4244      2:dis      2:dis       0.8  2
  4245      2:dis      2:dis       0.9  2
  4246      2:dis      2:dis       0.9  2
  4247      2:dis      2:dis       0.6  2
  4248      2:dis      2:dis       0.7  2
  4249      2:dis      2:dis       0.9  2
  4250      2:dis      2:dis       1  2
  4251      2:dis      2:dis       0.8  2
  4252      2:dis      2:dis       0.85  2
  4253      2:dis      2:dis       0.8  2
  4254      2:dis      2:dis       0.8  2
  4255      2:dis      2:dis       0.8  2
  4256      2:dis      2:dis       0.7  2
  4257      2:dis      2:dis       0.8  2
  4258      2:dis      2:dis       1  2
  4259      2:dis      2:dis       1  2
  4260      2:dis      2:dis       0.9  2
  4261      2:dis      2:dis       0.65  2
  4262      2:dis      2:dis       0.8  2
  4263      2:dis      2:dis       0.8  2
  4264      2:dis      2:dis       0.9  2
  4265      2:dis      2:dis       0.6  2
  4266      2:dis      2:dis       0.9  2
  4267      2:dis      1:ord   +   0.5  2
  4268      2:dis      2:dis       0.7  2
  4269      2:dis      2:dis       0.9  2
  4270      2:dis      2:dis       0.7  2
  4271      2:dis      2:dis       0.8  2
  4272      2:dis      2:dis       0.9  2
  4273      2:dis      2:dis       0.9  2
  4274      2:dis      2:dis       0.6  2
  4275      2:dis      2:dis       0.9  2
  4276      2:dis      2:dis       0.8  2
  4277      2:dis      2:dis       0.9  2
  4278      2:dis      2:dis       0.933  2
  4279      2:dis      2:dis       0.7  2
  4280      2:dis      2:dis       1  2
  4281      2:dis      2:dis       1  2
  4282      2:dis      2:dis       0.8  2
  4283      2:dis      2:dis       0.8  2
  4284      2:dis      2:dis       0.6  2
  4285      2:dis      2:dis       0.8  2
  4286      2:dis      2:dis       0.8  2
  4287      2:dis      2:dis       0.8  2
  4288      2:dis      2:dis       0.7  2
  4289      2:dis      2:dis       1  2
  4290      2:dis      2:dis       1  2
  4291      2:dis      2:dis       0.9  2
  4292      2:dis      2:dis       0.8  2
  4293      2:dis      2:dis       0.8  2
  4294      2:dis      2:dis       0.8  2
  4295      2:dis      2:dis       0.9  2
  4296      2:dis      2:dis       1  2
  4297      2:dis      2:dis       0.9  2
  4298      2:dis      2:dis       0.9  2
  4299      2:dis      2:dis       0.9  2
  4300      2:dis      2:dis       0.6  2
  4301      2:dis      2:dis       0.6  2
  4302      2:dis      2:dis       0.9  2
  4303      2:dis      2:dis       0.9  2
  4304      2:dis      2:dis       0.8  2
  4305      2:dis      2:dis       0.7  2
  4306      2:dis      2:dis       0.8  2
  4307      2:dis      2:dis       0.9  2
  4308      2:dis      2:dis       0.8  2
  4309      2:dis      2:dis       0.7  2
  4310      2:dis      2:dis       0.8  2
  4311      2:dis      2:dis       0.8  2
  4312      2:dis      2:dis       0.9  2
  4313      2:dis      2:dis       1  2
  4314      2:dis      2:dis       0.7  2
  4315      2:dis      2:dis       0.8  2
  4316      2:dis      2:dis       0.9  2
  4317      2:dis      2:dis       0.9  2
  4318      2:dis      2:dis       1  2
  4319      2:dis      2:dis       1  2
  4320      2:dis      2:dis       0.8  2
  4321      2:dis      1:ord   +   0.5  2
  4322      2:dis      2:dis       0.85  2
  4323      2:dis      2:dis       1  2
  4324      2:dis      2:dis       0.9  2
  4325      2:dis      2:dis       0.8  2
  4326      2:dis      2:dis       0.7  2
  4327      2:dis      2:dis       0.9  2
  4328      2:dis      2:dis       0.8  2
  4329      2:dis      2:dis       0.7  2
  4330      2:dis      2:dis       0.875  2
  4331      2:dis      2:dis       1  2
  4332      2:dis      1:ord   +   0.5  2
  4333      2:dis      2:dis       0.8  2
  4334      2:dis      2:dis       0.7  2
  4335      2:dis      2:dis       0.9  2
  4336      2:dis      2:dis       0.7  2
  4337      2:dis      2:dis       1  2
  4338      2:dis      2:dis       0.9  2
  4339      2:dis      2:dis       0.8  2
  4340      2:dis      2:dis       0.667  2
  4341      2:dis      2:dis       0.9  2
  4342      2:dis      2:dis       0.9  2
  4343      2:dis      2:dis       0.7  2
  4344      2:dis      2:dis       0.7  2
  4345      2:dis      2:dis       1  2
  4346      2:dis      2:dis       0.8  2
  4347      2:dis      2:dis       0.6  2
  4348      2:dis      2:dis       0.6  2
  4349      2:dis      2:dis       1  2
  4350      2:dis      2:dis       1  2
  4351      2:dis      2:dis       0.8  2
  4352      2:dis      2:dis       0.6  2
  4353      2:dis      2:dis       0.8  2
  4354      2:dis      2:dis       0.8  2
  4355      2:dis      2:dis       0.9  2
  4356      2:dis      2:dis       0.9  2
  4357      2:dis      2:dis       0.9  2
  4358      2:dis      2:dis       0.8  2
  4359      2:dis      2:dis       0.8  2
  4360      2:dis      2:dis       0.8  2
  4361      2:dis      2:dis       0.767  2
  4362      2:dis      2:dis       0.9  2
  4363      2:dis      2:dis       0.8  2
  4364      2:dis      2:dis       0.9  2
  4365      2:dis      2:dis       0.8  2
  4366      2:dis      2:dis       0.9  2
  4367      2:dis      2:dis       0.8  2
  4368      2:dis      2:dis       1  2
  4369      2:dis      1:ord   +   0.6  2
  4370      2:dis      2:dis       0.6  2
  4371      2:dis      2:dis       0.7  2
  4372      2:dis      2:dis       0.7  2
  4373      2:dis      2:dis       1  2
  4374      2:dis      2:dis       0.8  2
  4375      2:dis      2:dis       0.6  2
  4376      2:dis      2:dis       0.8  2
  4377      2:dis      2:dis       1  2
  4378      2:dis      2:dis       1  2
  4379      2:dis      2:dis       0.8  2
  4380      2:dis      2:dis       0.9  2
  4381      2:dis      2:dis       0.7  2
  4382      2:dis      2:dis       0.9  2
  4383      2:dis      2:dis       0.9  2
  4384      2:dis      2:dis       0.8  2
  4385      2:dis      2:dis       0.9  2
  4386      2:dis      2:dis       0.8  2
  4387      2:dis      2:dis       0.7  2
  4388      2:dis      2:dis       0.8  2
  4389      2:dis      2:dis       0.9  2
  4390      2:dis      2:dis       0.7  2
  4391      2:dis      2:dis       0.7  2
  4392      2:dis      2:dis       1  2
  4393      2:dis      2:dis       0.8  2
  4394      2:dis      2:dis       0.9  2
  4395      2:dis      2:dis       1  2
  4396      2:dis      2:dis       0.9  2
  4397      2:dis      2:dis       0.75  2
  4398      2:dis      2:dis       0.9  2
  4399      2:dis      2:dis       0.833  2
  4400      2:dis      2:dis       1  2
  4401      2:dis      2:dis       0.9  2
  4402      2:dis      2:dis       0.6  2
  4403      2:dis      2:dis       0.8  2
  4404      2:dis      2:dis       0.8  2
  4405      2:dis      2:dis       0.8  2
  4406      2:dis      2:dis       0.9  2
  4407      2:dis      2:dis       0.8  2
  4408      2:dis      2:dis       0.8  2
  4409      2:dis      2:dis       0.8  2
  4410      2:dis      2:dis       0.6  2
  4411      2:dis      2:dis       0.9  2
  4412      2:dis      2:dis       0.7  2
  4413      2:dis      2:dis       0.9  2
  4414      2:dis      2:dis       0.9  2
  4415      2:dis      2:dis       0.9  2
  4416      2:dis      2:dis       0.9  2
  4417      2:dis      2:dis       0.7  2
  4418      2:dis      2:dis       0.7  2
  4419      2:dis      2:dis       0.8  2
  4420      2:dis      2:dis       1  2
  4421      2:dis      2:dis       0.9  2
  4422      2:dis      2:dis       0.9  2
  4423      2:dis      2:dis       0.9  2
  4424      2:dis      2:dis       0.8  2
  4425      2:dis      2:dis       0.6  2
  4426      2:dis      2:dis       0.9  2
  4427      2:dis      2:dis       0.8  2
  4428      2:dis      2:dis       0.8  2
  4429      2:dis      2:dis       0.7  2
  4430      2:dis      2:dis       0.7  2
  4431      2:dis      2:dis       0.9  2
  4432      2:dis      2:dis       0.9  2
  4433      2:dis      2:dis       1  2
  4434      2:dis      2:dis       1  2
  4435      2:dis      2:dis       1  2
  4436      2:dis      2:dis       0.8  2
  4437      2:dis      2:dis       0.9  2
  4438      2:dis      2:dis       0.933  2
  4439      2:dis      2:dis       0.9  2
  4440      2:dis      2:dis       0.9  2
  4441      2:dis      2:dis       1  2
  4442      2:dis      2:dis       0.9  2
  4443      2:dis      2:dis       0.9  2
  4444      2:dis      2:dis       1  2
  4445      2:dis      2:dis       0.6  2
  4446      2:dis      2:dis       0.9  2
  4447      2:dis      2:dis       0.8  2
  4448      2:dis      2:dis       0.8  2
  4449      2:dis      1:ord   +   0.5  2
  4450      2:dis      2:dis       0.633  2
  4451      2:dis      2:dis       0.8  2
  4452      2:dis      2:dis       0.8  2
  4453      2:dis      2:dis       0.8  2
  4454      2:dis      2:dis       0.7  2
  4455      2:dis      2:dis       0.8  2
  4456      2:dis      2:dis       0.7  2
  4457      2:dis      2:dis       0.6  2
  4458      2:dis      2:dis       0.7  2
  4459      2:dis      2:dis       0.7  2
  4460      2:dis      2:dis       0.7  2
  4461      2:dis      2:dis       0.9  2
  4462      2:dis      2:dis       0.7  2
  4463      2:dis      2:dis       0.7  2
  4464      2:dis      2:dis       0.8  2
  4465      2:dis      2:dis       0.7  2
  4466      2:dis      2:dis       0.6  2
  4467      2:dis      2:dis       0.8  2
  4468      2:dis      2:dis       0.8  2
  4469      2:dis      2:dis       0.6  2
  4470      2:dis      2:dis       0.625  2
  4471      2:dis      2:dis       0.8  2
  4472      2:dis      1:ord   +   0.6  2
  4473      2:dis      2:dis       0.8  2
  4474      2:dis      2:dis       0.7  2
  4475      2:dis      2:dis       0.65  2
  4476      2:dis      2:dis       0.7  2
  4477      2:dis      2:dis       0.7  2
  4478      2:dis      2:dis       0.7  2
  4479      2:dis      2:dis       0.6  2
  4480      2:dis      2:dis       0.9  2
  4481      2:dis      2:dis       1  2
  4482      2:dis      2:dis       0.9  2
  4483      2:dis      2:dis       0.8  2
  4484      2:dis      2:dis       0.8  2
  4485      2:dis      2:dis       0.7  2
  4486      2:dis      2:dis       0.8  2
  4487      2:dis      2:dis       0.7  2
  4488      2:dis      2:dis       0.8  2
  4489      2:dis      2:dis       0.9  2
  4490      2:dis      2:dis       0.6  2
  4491      2:dis      2:dis       0.6  2
  4492      2:dis      2:dis       0.9  2
  4493      2:dis      2:dis       0.8  2
  4494      2:dis      2:dis       1  2
  4495      2:dis      2:dis       0.7  2
  4496      2:dis      2:dis       0.7  2
  4497      2:dis      2:dis       0.9  2
  4498      2:dis      2:dis       0.9  2
  4499      2:dis      2:dis       0.8  2
  4500      2:dis      2:dis       0.8  2
  4501      2:dis      2:dis       0.9  2
  4502      2:dis      2:dis       0.8  2
  4503      2:dis      2:dis       0.8  2
  4504      2:dis      2:dis       0.7  2
  4505      2:dis      2:dis       0.7  2
  4506      2:dis      2:dis       0.8  2
  4507      2:dis      2:dis       0.6  2
  4508      2:dis      2:dis       0.8  2
  4509      2:dis      2:dis       0.7  2
  4510      2:dis      2:dis       1  2
  4511      2:dis      2:dis       1  2
  4512      2:dis      2:dis       0.6  2
  4513      2:dis      2:dis       0.6  2
  4514      2:dis      2:dis       0.9  2
  4515      2:dis      2:dis       0.9  2
  4516      2:dis      2:dis       0.7  2
  4517      2:dis      1:ord   +   0.7  2
  4518      2:dis      2:dis       0.8  2
  4519      2:dis      2:dis       0.9  2
  4520      2:dis      2:dis       0.65  2
  4521      2:dis      2:dis       0.9  2
  4522      2:dis      2:dis       0.7  2
  4523      2:dis      2:dis       0.8  2
  4524      2:dis      2:dis       1  2
  4525      2:dis      2:dis       0.7  2
  4526      2:dis      2:dis       0.9  2
  4527      2:dis      2:dis       0.9  2
  4528      2:dis      2:dis       0.9  2
  4529      2:dis      2:dis       0.9  2
  4530      2:dis      2:dis       1  2
  4531      2:dis      2:dis       0.967  2
  4532      2:dis      2:dis       0.8  2
  4533      2:dis      2:dis       1  2
  4534      2:dis      2:dis       0.8  2
  4535      2:dis      2:dis       0.6  2
  4536      2:dis      2:dis       0.7  2
  4537      2:dis      2:dis       0.7  2
  4538      2:dis      2:dis       0.8  2
  4539      2:dis      2:dis       0.8  2
  4540      2:dis      2:dis       0.667  2
  4541      2:dis      2:dis       1  2
  4542      2:dis      2:dis       0.633  2
  4543      2:dis      2:dis       0.6  2
  4544      2:dis      2:dis       0.7  2
  4545      2:dis      2:dis       0.8  2
  4546      2:dis      2:dis       0.8  2
  4547      2:dis      2:dis       1  2
  4548      2:dis      2:dis       0.9  2
  4549      2:dis      2:dis       0.8  2
  4550      2:dis      2:dis       0.7  2
  4551      2:dis      2:dis       0.8  2
  4552      2:dis      2:dis       0.8  2
  4553      2:dis      2:dis       0.9  2
  4554      2:dis      2:dis       0.8  2
  4555      2:dis      2:dis       1  2
  4556      2:dis      2:dis       0.9  2
  4557      2:dis      2:dis       0.9  2
  4558      2:dis      2:dis       0.9  2
  4559      2:dis      2:dis       0.9  2
  4560      2:dis      2:dis       0.8  2
  4561      2:dis      2:dis       0.7  2
  4562      2:dis      2:dis       0.6  2
  4563      2:dis      2:dis       0.7  2
  4564      2:dis      2:dis       0.8  2
  4565      2:dis      2:dis       0.6  2
  4566      2:dis      2:dis       0.8  2
  4567      2:dis      2:dis       1  2
  4568      2:dis      2:dis       0.6  2
  4569      2:dis      2:dis       1  2
  4570      2:dis      2:dis       0.75  2
  4571      2:dis      2:dis       0.7  2
  4572      2:dis      2:dis       0.9  2
  4573      2:dis      2:dis       1  2
  4574      2:dis      2:dis       0.7  2
  4575      2:dis      2:dis       0.9  2
  4576      2:dis      2:dis       0.7  2
  4577      2:dis      2:dis       0.9  2
  4578      2:dis      2:dis       0.8  2
  4579      2:dis      2:dis       0.6  2
  4580      2:dis      2:dis       0.6  2
  4581      2:dis      2:dis       0.6  2
  4582      2:dis      2:dis       0.9  2
  4583      2:dis      2:dis       0.8  2
  4584      2:dis      2:dis       1  2
  4585      2:dis      2:dis       0.8  2
  4586      2:dis      2:dis       1  2
  4587      2:dis      2:dis       0.9  2
  4588      2:dis      2:dis       0.767  2
  4589      2:dis      2:dis       0.7  2
  4590      2:dis      2:dis       1  2
  4591      2:dis      2:dis       0.8  2
  4592      2:dis      2:dis       0.8  2
  4593      2:dis      2:dis       0.7  2
  4594      2:dis      2:dis       0.8  2
  4595      2:dis      2:dis       0.6  2
  4596      2:dis      2:dis       0.8  2
  4597      2:dis      2:dis       0.8  2
  4598      2:dis      2:dis       0.8  2
  4599      2:dis      2:dis       0.7  2
  4600      2:dis      2:dis       0.9  2
  4601      2:dis      2:dis       1  2
  4602      2:dis      2:dis       0.8  2
  4603      2:dis      2:dis       0.8  2
  4604      2:dis      2:dis       0.7  2
  4605      2:dis      2:dis       0.7  2
  4606      2:dis      2:dis       0.9  2
  4607      2:dis      2:dis       0.7  2
  4608      2:dis      2:dis       0.8  2
  4609      2:dis      2:dis       0.6  2
  4610      2:dis      2:dis       0.6  2
  4611      2:dis      2:dis       0.8  2
  4612      2:dis      2:dis       0.8  2
  4613      2:dis      2:dis       0.8  2
  4614      2:dis      2:dis       0.9  2
  4615      2:dis      1:ord   +   0.5  2
  4616      2:dis      2:dis       0.7  2
  4617      2:dis      2:dis       0.9  2
  4618      2:dis      2:dis       1  2
  4619      2:dis      2:dis       0.9  2
  4620      2:dis      2:dis       0.8  2
  4621      2:dis      2:dis       0.8  2
  4622      2:dis      2:dis       0.7  2
  4623      2:dis      2:dis       0.7  2
  4624      2:dis      2:dis       0.9  2
  4625      2:dis      2:dis       0.8  2
  4626      2:dis      2:dis       0.9  2
  4627      2:dis      2:dis       0.8  2
  4628      2:dis      2:dis       0.7  2
  4629      2:dis      2:dis       0.8  2
  4630      2:dis      2:dis       0.8  2
  4631      2:dis      2:dis       0.6  2
  4632      2:dis      2:dis       0.9  2
  4633      2:dis      2:dis       0.8  2
  4634      2:dis      1:ord   +   0.5  2
  4635      2:dis      1:ord   +   0.5  2
  4636      2:dis      2:dis       0.7  2
  4637      2:dis      2:dis       0.9  2
  4638      2:dis      2:dis       0.8  2
  4639      2:dis      2:dis       0.9  2
  4640      2:dis      2:dis       0.8  2
  4641      2:dis      2:dis       0.9  2
  4642      2:dis      2:dis       0.8  2
  4643      2:dis      2:dis       1  2
  4644      2:dis      2:dis       0.8  2
  4645      2:dis      2:dis       1  2
  4646      2:dis      2:dis       1  2
  4647      2:dis      2:dis       0.9  2
  4648      2:dis      2:dis       0.7  2
  4649      2:dis      2:dis       0.7  2
  4650      2:dis      2:dis       1  2
  4651      2:dis      2:dis       0.8  2
  4652      2:dis      2:dis       0.9  2
  4653      2:dis      2:dis       0.9  2
  4654      2:dis      2:dis       0.9  2
  4655      2:dis      2:dis       0.9  2
  4656      2:dis      2:dis       1  2
  4657      2:dis      2:dis       0.9  2
  4658      2:dis      2:dis       0.6  2
  4659      2:dis      2:dis       0.9  2
  4660      2:dis      2:dis       0.9  2
  4661      2:dis      2:dis       1  2
  4662      2:dis      2:dis       0.9  2
  4663      2:dis      2:dis       0.8  2
  4664      2:dis      2:dis       0.9  2
  4665      2:dis      2:dis       0.6  2
  4666      2:dis      2:dis       0.9  2
  4667      2:dis      2:dis       0.9  2
  4668      2:dis      2:dis       0.8  2
  4669      2:dis      1:ord   +   0.5  2
  4670      2:dis      2:dis       0.7  2
  4671      2:dis      2:dis       1  2
  4672      2:dis      2:dis       0.8  2
  4673      2:dis      2:dis       0.9  2
  4674      2:dis      1:ord   +   0.5  2
  4675      2:dis      2:dis       0.6  2
  4676      2:dis      2:dis       1  2
  4677      2:dis      2:dis       0.8  2
  4678      2:dis      2:dis       1  2
  4679      2:dis      2:dis       0.8  2
  4680      2:dis      2:dis       0.7  2
  4681      2:dis      2:dis       0.8  2
  4682      2:dis      2:dis       0.9  2
  4683      2:dis      2:dis       0.8  2
  4684      2:dis      2:dis       0.6  2
  4685      2:dis      2:dis       0.7  2
  4686      2:dis      2:dis       0.9  2
  4687      2:dis      2:dis       0.7  2
  4688      2:dis      2:dis       1  2
  4689      2:dis      2:dis       0.9  2
  4690      2:dis      2:dis       0.9  2
  4691      2:dis      2:dis       0.9  2
  4692      2:dis      2:dis       0.9  2
  4693      2:dis      2:dis       0.9  2
  4694      2:dis      2:dis       0.9  2
  4695      2:dis      2:dis       0.6  2
  4696      2:dis      2:dis       0.6  2
  4697      2:dis      2:dis       0.8  2
  4698      2:dis      2:dis       0.9  2
  4699      2:dis      2:dis       0.6  2
  4700      2:dis      2:dis       0.9  2
  4701      2:dis      2:dis       0.8  2
  4702      2:dis      2:dis       0.8  2
  4703      2:dis      2:dis       0.9  2
  4704      2:dis      2:dis       1  2
  4705      2:dis      2:dis       0.9  2
  4706      2:dis      2:dis       0.9  2
  4707      2:dis      2:dis       0.6  2
  4708      2:dis      2:dis       0.8  2
  4709      2:dis      2:dis       0.8  2
  4710      2:dis      2:dis       1  2
  4711      2:dis      2:dis       0.9  2
  4712      2:dis      2:dis       0.9  2
  4713      2:dis      2:dis       1  2
  4714      2:dis      2:dis       0.7  2
  4715      2:dis      2:dis       0.7  2
  4716      2:dis      2:dis       0.9  2
  4717      2:dis      2:dis       1  2
  4718      2:dis      2:dis       0.7  2
  4719      2:dis      2:dis       0.6  2
  4720      2:dis      2:dis       1  2
  4721      2:dis      2:dis       0.8  2
  4722      2:dis      2:dis       0.7  2
  4723      2:dis      2:dis       0.8  2
  4724      2:dis      2:dis       0.9  2
  4725      2:dis      2:dis       0.8  2
  4726      2:dis      2:dis       0.7  2
  4727      2:dis      2:dis       0.8  2
  4728      2:dis      2:dis       0.9  2
  4729      2:dis      2:dis       0.8  2
  4730      2:dis      2:dis       0.9  2
  4731      2:dis      2:dis       0.85  2
  4732      2:dis      2:dis       0.7  2
  4733      2:dis      2:dis       0.85  2
  4734      2:dis      2:dis       0.9  2
  4735      2:dis      2:dis       0.6  2
  4736      2:dis      2:dis       0.6  2
  4737      2:dis      2:dis       0.8  2
  4738      2:dis      2:dis       0.7  2
  4739      2:dis      2:dis       1  2
  4740      2:dis      2:dis       0.55  2
  4741      2:dis      2:dis       0.8  2
  4742      2:dis      2:dis       0.9  2
  4743      2:dis      2:dis       0.9  2
  4744      2:dis      2:dis       0.9  2
  4745      2:dis      2:dis       0.7  2
  4746      2:dis      2:dis       0.9  2
  4747      2:dis      2:dis       0.9  2
  4748      2:dis      2:dis       0.7  2
  4749      2:dis      2:dis       0.8  2
  4750      2:dis      2:dis       0.7  2
  4751      2:dis      2:dis       0.833  2
  4752      2:dis      2:dis       1  2
  4753      2:dis      2:dis       0.8  2
  4754      2:dis      2:dis       0.7  2
  4755      2:dis      2:dis       0.8  2
  4756      2:dis      2:dis       0.7  2
  4757      2:dis      2:dis       0.9  2
  4758      2:dis      2:dis       0.9  2
  4759      2:dis      2:dis       0.9  2
  4760      2:dis      2:dis       0.9  2
  4761      2:dis      2:dis       0.7  2
  4762      2:dis      2:dis       0.8  2
  4763      2:dis      2:dis       0.9  2
  4764      2:dis      2:dis       0.7  2
  4765      2:dis      2:dis       0.8  2
  4766      2:dis      2:dis       0.7  2
  4767      2:dis      2:dis       0.7  2
  4768      2:dis      2:dis       0.8  2
  4769      2:dis      2:dis       0.7  2
  4770      2:dis      2:dis       0.8  2
  4771      2:dis      2:dis       1  2
  4772      2:dis      2:dis       0.9  2
  4773      2:dis      2:dis       0.8  2
  4774      2:dis      2:dis       0.9  2
  4775      2:dis      2:dis       0.7  2
  4776      2:dis      2:dis       0.8  2
  4777      2:dis      2:dis       0.9  2
  4778      2:dis      2:dis       0.9  2
  4779      2:dis      2:dis       0.9  2
  4780      2:dis      2:dis       1  2
  4781      2:dis      2:dis       0.8  2
  4782      2:dis      2:dis       0.9  2
  4783      2:dis      2:dis       0.7  2
  4784      2:dis      2:dis       0.6  2
  4785      2:dis      1:ord   +   0.6  2
  4786      2:dis      2:dis       0.9  2
  4787      2:dis      2:dis       0.7  2
  4788      2:dis      2:dis       0.95  2
  4789      2:dis      2:dis       0.9  2
  4790      2:dis      2:dis       0.9  2
  4791      2:dis      2:dis       1  2
  4792      2:dis      1:ord   +   0.5  2
  4793      2:dis      2:dis       1  2
  4794      2:dis      2:dis       0.8  2
  4795      2:dis      2:dis       0.9  2
  4796      2:dis      2:dis       0.8  2
  4797      2:dis      2:dis       0.8  2
  4798      2:dis      2:dis       0.7  2
  4799      2:dis      2:dis       0.75  2
  4800      2:dis      2:dis       0.9  2
  4801      2:dis      2:dis       1  2
  4802      2:dis      2:dis       1  2
  4803      2:dis      2:dis       1  2
  4804      2:dis      2:dis       0.9  2
  4805      2:dis      2:dis       1  2
  4806      2:dis      2:dis       1  2
  4807      2:dis      2:dis       0.8  2
  4808      2:dis      2:dis       0.6  2
  4809      2:dis      2:dis       0.9  2
  4810      2:dis      2:dis       0.9  2
  4811      2:dis      2:dis       0.8  2
  4812      2:dis      2:dis       0.9  2
  4813      2:dis      2:dis       1  2
  4814      2:dis      2:dis       0.7  2
  4815      2:dis      2:dis       0.8  2
  4816      2:dis      2:dis       0.6  2
  4817      2:dis      2:dis       0.8  2
  4818      2:dis      2:dis       0.85  2
  4819      2:dis      2:dis       0.9  2
  4820      2:dis      2:dis       0.9  2
  4821      2:dis      2:dis       1  2
  4822      2:dis      2:dis       0.7  2
  4823      2:dis      2:dis       0.8  2
  4824      2:dis      2:dis       0.8  2
  4825      2:dis      2:dis       1  2
  4826      2:dis      2:dis       0.9  2
  4827      2:dis      2:dis       0.9  2
  4828      2:dis      1:ord   +   0.5  2
  4829      2:dis      2:dis       0.7  2
  4830      2:dis      2:dis       0.7  2
  4831      2:dis      2:dis       0.6  2
  4832      2:dis      2:dis       0.6  2
  4833      2:dis      2:dis       0.9  2
  4834      2:dis      2:dis       0.8  2
  4835      2:dis      2:dis       0.9  2
  4836      2:dis      2:dis       0.7  2
  4837      2:dis      2:dis       0.6  2
  4838      2:dis      2:dis       0.9  2
  4839      2:dis      2:dis       0.8  2
  4840      2:dis      2:dis       0.8  2
  4841      2:dis      2:dis       0.8  2
  4842      2:dis      2:dis       0.7  2
  4843      2:dis      2:dis       0.9  2
  4844      2:dis      2:dis       0.7  2
  4845      2:dis      2:dis       0.9  2
  4846      2:dis      2:dis       0.7  2
  4847      2:dis      2:dis       0.9  2
  4848      2:dis      2:dis       0.9  2
  4849      2:dis      2:dis       0.7  2
  4850      2:dis      2:dis       0.8  2
  4851      2:dis      2:dis       0.85  2
  4852      2:dis      2:dis       0.7  2
  4853      2:dis      2:dis       1  2
  4854      2:dis      2:dis       1  2
  4855      2:dis      2:dis       0.9  2
  4856      2:dis      2:dis       1  2
  4857      2:dis      2:dis       0.6  2
  4858      2:dis      2:dis       0.9  2
  4859      2:dis      2:dis       0.6  2
  4860      2:dis      2:dis       0.8  2
  4861      2:dis      2:dis       0.8  2
  4862      2:dis      2:dis       0.633  2
  4863      2:dis      2:dis       0.9  2
  4864      2:dis      2:dis       0.9  2
  4865      2:dis      2:dis       1  2
  4866      2:dis      2:dis       0.9  2
  4867      2:dis      2:dis       0.7  2
  4868      2:dis      2:dis       1  2
  4869      2:dis      2:dis       0.9  2
  4870      2:dis      2:dis       0.7  2
  4871      2:dis      2:dis       1  2
  4872      2:dis      2:dis       0.9  2
  4873      2:dis      2:dis       0.7  2
  4874      2:dis      2:dis       0.7  2
  4875      2:dis      2:dis       0.9  2
  4876      2:dis      2:dis       0.8  2
  4877      2:dis      2:dis       0.9  2
  4878      2:dis      2:dis       0.8  2
  4879      2:dis      2:dis       0.9  2
  4880      2:dis      2:dis       0.9  2
  4881      2:dis      2:dis       0.85  2
  4882      2:dis      2:dis       0.8  2
  4883      2:dis      2:dis       0.6  2
  4884      2:dis      2:dis       0.8  2
  4885      2:dis      2:dis       0.8  2
  4886      2:dis      2:dis       0.85  2
  4887      2:dis      2:dis       0.9  2
  4888      2:dis      2:dis       1  2
  4889      2:dis      2:dis       0.9  2
  4890      2:dis      2:dis       0.8  2
  4891      2:dis      2:dis       0.9  2
  4892      2:dis      2:dis       0.9  2
  4893      2:dis      2:dis       0.8  2
  4894      2:dis      2:dis       0.9  2
  4895      2:dis      2:dis       1  2
  4896      2:dis      2:dis       0.8  2
  4897      2:dis      2:dis       0.6  2
  4898      2:dis      2:dis       0.8  2
  4899      2:dis      2:dis       0.7  2
  4900      2:dis      2:dis       0.9  2
  4901      2:dis      2:dis       1  2
  4902      2:dis      2:dis       0.8  2
  4903      2:dis      2:dis       0.9  2
  4904      2:dis      2:dis       0.9  2
  4905      2:dis      2:dis       0.7  2
  4906      2:dis      2:dis       0.7  2
  4907      2:dis      2:dis       0.9  2
  4908      2:dis      2:dis       0.9  2
  4909      2:dis      2:dis       0.9  2
  4910      2:dis      2:dis       0.8  2
  4911      2:dis      2:dis       0.75  2
  4912      2:dis      2:dis       0.9  2
  4913      2:dis      2:dis       0.6  2
  4914      2:dis      2:dis       0.9  2
  4915      2:dis      2:dis       0.8  2
  4916      2:dis      2:dis       0.9  2
  4917      2:dis      2:dis       0.9  2
  4918      2:dis      2:dis       0.8  2
  4919      2:dis      2:dis       1  2
  4920      2:dis      2:dis       1  2
  4921      2:dis      2:dis       0.9  2
  4922      2:dis      2:dis       0.8  2
  4923      2:dis      2:dis       0.8  2
  4924      2:dis      2:dis       0.7  2
  4925      2:dis      2:dis       0.9  2
  4926      2:dis      2:dis       0.9  2
  4927      2:dis      2:dis       0.9  2
  4928      2:dis      2:dis       0.9  2
  4929      2:dis      2:dis       0.9  2
  4930      2:dis      2:dis       0.8  2
  4931      2:dis      2:dis       0.65  2
  4932      2:dis      2:dis       0.8  2
  4933      2:dis      2:dis       0.7  2
  4934      2:dis      2:dis       0.75  2
  4935      2:dis      2:dis       0.9  2
  4936      2:dis      2:dis       1  2
  4937      2:dis      2:dis       0.7  2
  4938      2:dis      2:dis       0.9  2
  4939      2:dis      2:dis       0.7  2
  4940      2:dis      2:dis       1  2
  4941      2:dis      2:dis       0.9  2
  4942      2:dis      2:dis       1  2
  4943      2:dis      2:dis       0.9  2
  4944      2:dis      2:dis       0.6  2
  4945      2:dis      2:dis       0.8  2
  4946      2:dis      2:dis       0.6  2
  4947      2:dis      2:dis       0.8  2
  4948      2:dis      2:dis       0.8  2
  4949      2:dis      2:dis       0.9  2
  4950      2:dis      2:dis       0.9  2
  4951      2:dis      2:dis       0.7  2
  4952      2:dis      2:dis       0.8  2
  4953      2:dis      2:dis       1  2
  4954      2:dis      2:dis       1  2
  4955      2:dis      2:dis       0.8  2
  4956      2:dis      2:dis       0.9  2
  4957      2:dis      2:dis       0.9  2
  4958      2:dis      2:dis       0.9  2
  4959      2:dis      2:dis       1  2
  4960      2:dis      2:dis       1  2
  4961      2:dis      2:dis       0.9  2
  4962      2:dis      2:dis       0.9  2
  4963      2:dis      2:dis       0.9  2
  4964      2:dis      2:dis       0.9  2
  4965      2:dis      2:dis       0.8  2
  4966      2:dis      2:dis       0.8  2
  4967      2:dis      2:dis       0.7  2
  4968      2:dis      2:dis       1  2
  4969      2:dis      2:dis       0.8  2
  4970      2:dis      2:dis       0.9  2
  4971      2:dis      2:dis       1  2
  4972      2:dis      2:dis       0.75  2
  4973      2:dis      2:dis       0.9  2
  4974      2:dis      2:dis       0.9  2
  4975      2:dis      2:dis       0.9  2
  4976      2:dis      2:dis       0.8  2
  4977      2:dis      2:dis       0.9  2
  4978      2:dis      2:dis       0.767  2
  4979      2:dis      2:dis       1  2
  4980      2:dis      2:dis       1  2
  4981      2:dis      2:dis       1  2
  4982      2:dis      2:dis       0.8  2
  4983      2:dis      2:dis       0.6  2
  4984      2:dis      2:dis       0.9  2
  4985      2:dis      2:dis       0.7  2
  4986      2:dis      2:dis       0.7  2
  4987      2:dis      2:dis       0.9  2
  4988      2:dis      2:dis       0.9  2
  4989      2:dis      2:dis       0.9  2
  4990      2:dis      2:dis       0.8  2
  4991      2:dis      2:dis       0.7  2
  4992      2:dis      2:dis       0.7  2
  4993      2:dis      2:dis       0.9  2
  4994      2:dis      2:dis       1  2
  4995      2:dis      2:dis       0.8  2
  4996      2:dis      2:dis       1  2
  4997      2:dis      2:dis       0.8  2
  4998      2:dis      2:dis       0.8  2
  4999      2:dis      2:dis       0.9  2
  5000      2:dis      2:dis       0.9  2
  5001      2:dis      2:dis       0.8  2
  5002      2:dis      2:dis       0.9  2
  5003      2:dis      2:dis       0.8  2
  5004      2:dis      2:dis       0.85  2
  5005      2:dis      2:dis       0.9  2
  5006      2:dis      2:dis       1  2
  5007      2:dis      2:dis       1  2
  5008      2:dis      2:dis       1  2
  5009      2:dis      2:dis       1  2
  5010      2:dis      2:dis       0.9  2
  5011      2:dis      2:dis       0.9  2
  5012      2:dis      2:dis       0.8  2
  5013      2:dis      2:dis       1  2
  5014      2:dis      2:dis       0.9  2
  5015      2:dis      2:dis       0.9  2
  5016      2:dis      2:dis       0.85  2
  5017      2:dis      2:dis       0.9  2
  5018      2:dis      2:dis       0.9  2
  5019      2:dis      2:dis       1  2
  5020      2:dis      2:dis       1  2
  5021      2:dis      2:dis       0.7  2
  5022      2:dis      2:dis       0.8  2
  5023      2:dis      2:dis       1  2
  5024      2:dis      2:dis       0.9  2
  5025      2:dis      2:dis       0.7  2
  5026      2:dis      2:dis       1  2
  5027      2:dis      2:dis       0.8  2
  5028      2:dis      2:dis       1  2
  5029      2:dis      2:dis       0.8  2
  5030      2:dis      2:dis       0.6  2
  5031      2:dis      2:dis       1  2
  5032      2:dis      2:dis       0.9  2
  5033      2:dis      2:dis       1  2
  5034      2:dis      2:dis       0.9  2
  5035      2:dis      2:dis       1  2
  5036      2:dis      2:dis       0.7  2
  5037      2:dis      2:dis       0.7  2
  5038      2:dis      2:dis       0.8  2
  5039      2:dis      2:dis       0.8  2
  5040      2:dis      2:dis       0.9  2
  5041      2:dis      2:dis       0.8  2
  5042      2:dis      2:dis       0.9  2
  5043      2:dis      2:dis       0.9  2
  5044      2:dis      2:dis       1  2
  5045      2:dis      2:dis       0.7  2
  5046      2:dis      2:dis       0.7  2
  5047      2:dis      2:dis       0.7  2
  5048      2:dis      2:dis       1  2
  5049      2:dis      2:dis       0.9  2
  5050      2:dis      2:dis       0.85  2
  5051      2:dis      2:dis       1  2
  5052      2:dis      2:dis       0.9  2
  5053      2:dis      2:dis       0.9  2
  5054      2:dis      2:dis       0.8  2
  5055      2:dis      2:dis       1  2
  5056      2:dis      2:dis       0.9  2
  5057      2:dis      2:dis       0.85  2
  5058      2:dis      2:dis       0.833  2
  5059      2:dis      2:dis       0.9  2
  5060      2:dis      2:dis       0.9  2
  5061      2:dis      2:dis       0.733  2
  5062      2:dis      2:dis       0.9  2
  5063      2:dis      2:dis       0.85  2
  5064      2:dis      2:dis       0.8  2
  5065      2:dis      2:dis       0.7  2
  5066      2:dis      2:dis       1  2
  5067      2:dis      2:dis       0.8  2
  5068      2:dis      2:dis       0.9  2
  5069      2:dis      2:dis       0.9  2
  5070      2:dis      2:dis       0.9  2
  5071      2:dis      2:dis       0.8  2
  5072      2:dis      2:dis       0.9  2
  5073      2:dis      2:dis       0.8  2
  5074      2:dis      2:dis       0.8  2
  5075      2:dis      2:dis       0.8  2
  5076      2:dis      2:dis       1  2
  5077      2:dis      2:dis       1  2
  5078      2:dis      2:dis       0.8  2
  5079      2:dis      2:dis       1  2
  5080      2:dis      2:dis       1  2
  5081      2:dis      2:dis       1  2
  5082      2:dis      2:dis       0.8  2
  5083      2:dis      2:dis       0.6  2
  5084      2:dis      2:dis       0.9  2
  5085      2:dis      2:dis       0.8  2
  5086      2:dis      2:dis       0.9  2
  5087      2:dis      2:dis       0.9  2
  5088      2:dis      2:dis       0.8  2
  5089      2:dis      2:dis       0.9  2
  5090      2:dis      2:dis       0.9  2
  5091      2:dis      2:dis       0.8  2
  5092      2:dis      2:dis       0.9  2
  5093      2:dis      2:dis       1  2
  5094      2:dis      2:dis       0.9  2
  5095      2:dis      2:dis       1  2
  5096      2:dis      2:dis       1  2
  5097      2:dis      2:dis       0.9  2
  5098      2:dis      2:dis       1  2
  5099      2:dis      2:dis       0.9  2
  5100      2:dis      2:dis       0.7  2
  5101      2:dis      2:dis       1  2
  5102      2:dis      2:dis       0.8  2
  5103      2:dis      2:dis       0.9  2
  5104      2:dis      2:dis       1  2
  5105      2:dis      2:dis       0.9  2
  5106      2:dis      2:dis       0.6  2
  5107      2:dis      2:dis       0.8  2
  5108      2:dis      2:dis       1  2
  5109      2:dis      2:dis       1  2
  5110      2:dis      2:dis       0.8  2
  5111      2:dis      2:dis       0.9  2
  5112      2:dis      2:dis       0.7  2
  5113      2:dis      2:dis       0.8  2
  5114      2:dis      2:dis       0.7  2
  5115      2:dis      2:dis       0.9  2
  5116      2:dis      2:dis       0.75  2
  5117      2:dis      2:dis       0.95  2
  5118      2:dis      2:dis       1  2
  5119      2:dis      2:dis       0.7  2
  5120      2:dis      2:dis       0.9  2
  5121      2:dis      2:dis       0.8  2
  5122      2:dis      2:dis       1  2
  5123      2:dis      2:dis       1  2
  5124      2:dis      2:dis       1  2
  5125      2:dis      2:dis       0.8  2
  5126      2:dis      2:dis       0.7  2
  5127      2:dis      2:dis       0.9  2
  5128      2:dis      2:dis       1  2
  5129      2:dis      2:dis       0.733  2
  5130      2:dis      2:dis       0.9  2
  5131      2:dis      2:dis       1  2
  5132      2:dis      2:dis       0.9  2
  5133      2:dis      2:dis       1  2
  5134      2:dis      2:dis       0.8  2
  5135      2:dis      2:dis       0.9  2
  5136      2:dis      2:dis       0.6  2
  5137      2:dis      2:dis       1  2
  5138      2:dis      2:dis       0.9  2
  5139      2:dis      2:dis       1  2
  5140      2:dis      2:dis       1  2
  5141      2:dis      2:dis       1  2
  5142      2:dis      2:dis       1  2
  5143      2:dis      2:dis       0.8  2
  5144      2:dis      2:dis       1  2
  5145      2:dis      2:dis       0.8  2
  5146      2:dis      2:dis       1  2
  5147      2:dis      2:dis       0.9  2
  5148      2:dis      2:dis       0.9  2
  5149      2:dis      2:dis       0.9  2
  5150      2:dis      2:dis       0.7  2
  5151      2:dis      2:dis       0.9  2
  5152      2:dis      2:dis       0.7  2
  5153      2:dis      2:dis       0.7  2
  5154      2:dis      2:dis       0.8  2
  5155      2:dis      2:dis       1  2
  5156      2:dis      2:dis       0.8  2
  5157      2:dis      2:dis       1  2
  5158      2:dis      2:dis       0.8  2
  5159      2:dis      2:dis       0.9  2
  5160      2:dis      2:dis       0.9  2
  5161      2:dis      2:dis       0.9  2
  5162      2:dis      2:dis       0.9  2
  5163      2:dis      2:dis       0.9  2
  5164      2:dis      2:dis       0.8  2
  5165      2:dis      2:dis       0.95  2
  5166      2:dis      2:dis       1  2
  5167      2:dis      2:dis       0.8  2
  5168      2:dis      2:dis       1  2
  5169      2:dis      2:dis       0.7  2
  5170      2:dis      2:dis       1  2
  5171      2:dis      2:dis       0.7  2
  5172      2:dis      2:dis       0.9  2
  5173      2:dis      2:dis       0.9  2
  5174      2:dis      2:dis       0.75  2
  5175      2:dis      2:dis       1  2
  5176      2:dis      2:dis       1  2
  5177      2:dis      2:dis       0.9  2
  5178      2:dis      2:dis       1  2
  5179      2:dis      2:dis       0.9  2
  5180      2:dis      2:dis       0.9  2
  5181      2:dis      2:dis       1  2
  5182      2:dis      2:dis       1  2
  5183      2:dis      2:dis       1  2
  5184      2:dis      2:dis       1  2
  5185      2:dis      2:dis       0.9  2
  5186      2:dis      2:dis       0.9  2
  5187      2:dis      2:dis       1  2
  5188      2:dis      2:dis       0.9  2
  5189      2:dis      2:dis       0.8  2
  5190      2:dis      2:dis       0.8  2
  5191      2:dis      2:dis       1  2
  5192      2:dis      2:dis       0.7  2
  5193      2:dis      2:dis       1  2
  5194      2:dis      2:dis       1  2
  5195      2:dis      2:dis       0.8  2
  5196      2:dis      2:dis       0.9  2
  5197      2:dis      2:dis       0.9  2
  5198      2:dis      2:dis       0.9  2
  5199      2:dis      2:dis       1  2
  5200      2:dis      2:dis       0.8  2
  5201      2:dis      2:dis       1  2
  5202      2:dis      2:dis       0.9  2
  5203      2:dis      2:dis       0.8  2
  5204      2:dis      2:dis       0.8  2
  5205      2:dis      2:dis       0.86  2
  5206      2:dis      2:dis       1  2
  5207      2:dis      2:dis       1  2
  5208      2:dis      2:dis       0.9  2
  5209      2:dis      2:dis       1  2
  5210      2:dis      2:dis       0.8  2
  5211      2:dis      2:dis       0.9  2
  5212      2:dis      2:dis       0.9  2
  5213      2:dis      2:dis       1  2
  5214      2:dis      2:dis       0.9  2
  5215      2:dis      2:dis       1  2
  5216      2:dis      2:dis       1  2
  5217      2:dis      2:dis       0.9  2
  5218      2:dis      2:dis       0.9  2
  5219      2:dis      2:dis       0.95  2
  5220      2:dis      2:dis       1  2
  5221      2:dis      2:dis       0.9  2
  5222      2:dis      2:dis       1  2
  5223      2:dis      2:dis       0.8  2
  5224      2:dis      2:dis       0.9  2
  5225      2:dis      2:dis       0.9  2
  5226      2:dis      2:dis       0.7  2
  5227      2:dis      2:dis       0.8  2
  5228      2:dis      2:dis       1  2
  5229      2:dis      2:dis       1  2
  5230      2:dis      2:dis       0.9  2
  5231      2:dis      2:dis       0.6  2
  5232      2:dis      2:dis       0.8  2
  5233      2:dis      2:dis       0.9  2
  5234      2:dis      2:dis       1  2
  5235      2:dis      2:dis       1  2
  5236      2:dis      2:dis       0.9  2
  5237      2:dis      2:dis       0.9  2
  5238      2:dis      2:dis       0.9  2
  5239      2:dis      2:dis       1  2
  5240      2:dis      2:dis       0.9  2
  5241      2:dis      2:dis       0.9  2
  5242      2:dis      2:dis       0.8  2
  5243      2:dis      2:dis       0.9  2
  5244      2:dis      2:dis       0.8  2
  5245      2:dis      2:dis       1  2
  5246      2:dis      2:dis       1  2
  5247      2:dis      2:dis       0.8  2
  5248      2:dis      2:dis       1  2
  5249      2:dis      2:dis       0.8  2
  5250      2:dis      2:dis       0.9  2
  5251      2:dis      2:dis       0.9  2
  5252      2:dis      2:dis       1  2
  5253      2:dis      2:dis       0.9  2
  5254      2:dis      2:dis       0.8  2
  5255      2:dis      2:dis       1  2
  5256      2:dis      2:dis       0.9  2
  5257      2:dis      2:dis       0.9  2
  5258      2:dis      2:dis       1  2
  5259      2:dis      2:dis       0.8  2
  5260      2:dis      2:dis       0.8  2
  5261      2:dis      2:dis       0.9  2
  5262      2:dis      2:dis       0.9  2
  5263      2:dis      2:dis       0.9  2
  5264      2:dis      2:dis       0.9  2
  5265      2:dis      2:dis       1  2
  5266      2:dis      2:dis       1  2
  5267      2:dis      2:dis       0.7  2
  5268      2:dis      2:dis       0.8  2
  5269      2:dis      2:dis       1  2
  5270      2:dis      2:dis       0.8  2
  5271      2:dis      2:dis       0.7  2
  5272      2:dis      2:dis       0.9  2
  5273      2:dis      2:dis       1  2
  5274      2:dis      2:dis       0.8  2
  5275      2:dis      2:dis       0.85  2
  5276      2:dis      2:dis       0.9  2
  5277      2:dis      2:dis       0.9  2
  5278      2:dis      2:dis       1  2
  5279      2:dis      2:dis       0.9  2
  5280      2:dis      2:dis       0.9  2
  5281      2:dis      2:dis       0.9  2
  5282      2:dis      2:dis       0.9  2
  5283      2:dis      2:dis       1  2
  5284      2:dis      2:dis       1  2
  5285      2:dis      2:dis       1  2
  5286      2:dis      2:dis       0.8  2
  5287      2:dis      2:dis       0.9  2
  5288      2:dis      2:dis       0.8  2
  5289      2:dis      2:dis       0.9  2
  5290      2:dis      2:dis       0.8  2
  5291      2:dis      2:dis       0.8  2
  5292      2:dis      2:dis       0.9  2
  5293      2:dis      2:dis       0.9  2
  5294      2:dis      2:dis       0.9  2
  5295      2:dis      2:dis       1  2
  5296      2:dis      2:dis       1  2
  5297      2:dis      2:dis       0.9  2
  5298      2:dis      2:dis       0.9  2
  5299      2:dis      2:dis       0.7  2
  5300      2:dis      2:dis       0.9  2
  5301      2:dis      2:dis       0.9  2
  5302      2:dis      2:dis       0.9  2
  5303      2:dis      2:dis       0.7  2
  5304      2:dis      2:dis       0.9  2
  5305      2:dis      2:dis       1  2
  5306      2:dis      2:dis       0.9  2
  5307      2:dis      2:dis       1  2
  5308      2:dis      2:dis       1  2
  5309      2:dis      2:dis       0.9  2
  5310      2:dis      2:dis       0.8  2
  5311      2:dis      2:dis       1  2
  5312      2:dis      2:dis       0.7  2
  5313      2:dis      2:dis       1  2
  5314      2:dis      2:dis       1  2
  5315      2:dis      2:dis       0.8  2
  5316      2:dis      2:dis       0.8  2
  5317      2:dis      2:dis       1  2
  5318      2:dis      2:dis       0.9  2
  5319      2:dis      2:dis       0.9  2
  5320      2:dis      2:dis       0.8  2
  5321      2:dis      2:dis       0.6  2
  5322      2:dis      2:dis       1  2
  5323      2:dis      2:dis       1  2
  5324      2:dis      2:dis       0.9  2
  5325      2:dis      2:dis       0.9  2
  5326      2:dis      2:dis       0.9  2
  5327      2:dis      2:dis       0.8  2
  5328      2:dis      2:dis       0.9  2
  5329      2:dis      2:dis       0.9  2
  5330      2:dis      2:dis       1  2
  5331      2:dis      2:dis       0.9  2
  5332      2:dis      2:dis       0.9  2
  5333      2:dis      2:dis       0.9  2
  5334      2:dis      2:dis       1  2
  5335      2:dis      2:dis       0.9  2
  5336      2:dis      2:dis       1  2
  5337      2:dis      2:dis       0.85  2
  5338      2:dis      2:dis       1  2
  5339      2:dis      2:dis       1  2
  5340      2:dis      2:dis       1  2
  5341      2:dis      2:dis       0.9  2
  5342      2:dis      2:dis       0.9  2
  5343      2:dis      2:dis       0.9  2
  5344      2:dis      2:dis       1  2
  5345      2:dis      2:dis       1  2
  5346      2:dis      2:dis       1  2
  5347      2:dis      2:dis       1  2
  5348      2:dis      2:dis       1  2
  5349      2:dis      2:dis       1  2
  5350      2:dis      2:dis       1  2
  5351      2:dis      2:dis       0.7  2
  5352      2:dis      2:dis       1  2
  5353      2:dis      2:dis       0.9  2
  5354      2:dis      2:dis       0.9  2
  5355      2:dis      2:dis       0.9  2
  5356      2:dis      2:dis       1  2
  5357      2:dis      2:dis       1  2
  5358      2:dis      2:dis       1  2
  5359      2:dis      2:dis       1  2
  5360      2:dis      2:dis       1  2
  5361      2:dis      2:dis       0.7  2
  5362      2:dis      2:dis       0.8  2
  5363      2:dis      2:dis       1  2
  5364      2:dis      2:dis       1  2
  5365      2:dis      2:dis       0.9  2
  5366      2:dis      2:dis       1  2
  5367      2:dis      2:dis       0.9  2
  5368      2:dis      2:dis       0.9  2
  5369      2:dis      2:dis       0.9  2
  5370      2:dis      2:dis       0.9  2
  5371      2:dis      2:dis       0.9  2
  5372      2:dis      2:dis       0.9  2
  5373      2:dis      2:dis       0.9  2
  5374      2:dis      2:dis       1  2
  5375      2:dis      2:dis       0.9  2
  5376      2:dis      2:dis       1  2
  5377      2:dis      2:dis       1  2
  5378      2:dis      2:dis       1  2
  5379      2:dis      2:dis       1  2
  5380      2:dis      2:dis       0.7  2
  5381      2:dis      2:dis       1  2
  5382      2:dis      2:dis       1  2
  5383      2:dis      2:dis       1  2
  5384      2:dis      2:dis       1  2
  5385      2:dis      2:dis       1  2
  5386      2:dis      2:dis       0.9  2
  5387      2:dis      2:dis       1  2
  5388      2:dis      2:dis       0.9  2
  5389      2:dis      2:dis       1  2
  5390      2:dis      2:dis       1  2
  5391      2:dis      2:dis       0.9  2
  5392      2:dis      2:dis       0.9  2
  5393      2:dis      2:dis       0.8  2
  5394      2:dis      2:dis       0.8  2
  5395      2:dis      2:dis       0.9  2
  5396      2:dis      2:dis       1  2
  5397      2:dis      2:dis       1  2
  5398      2:dis      2:dis       1  2
  5399      2:dis      2:dis       0.9  2
  5400      2:dis      2:dis       0.9  2
  5401      2:dis      2:dis       1  2
  5402      2:dis      2:dis       1  2
  5403      2:dis      2:dis       1  2
  5404      2:dis      2:dis       0.9  2
  5405      2:dis      2:dis       1  2
  5406      2:dis      2:dis       0.9  2
  5407      2:dis      2:dis       1  2
  5408      2:dis      2:dis       0.9  2
  5409      2:dis      2:dis       1  2
  5410      2:dis      2:dis       0.8  2
  5411      2:dis      2:dis       0.9  2
  5412      2:dis      2:dis       1  2
  5413      2:dis      2:dis       1  2
  5414      2:dis      2:dis       0.9  2
  5415      2:dis      2:dis       1  2
  5416      2:dis      2:dis       0.7  2
  5417      2:dis      2:dis       0.8  2
  5418      2:dis      2:dis       0.9  2
  5419      2:dis      2:dis       0.9  2
  5420      2:dis      2:dis       1  2
  5421      2:dis      2:dis       0.7  2
  5422      2:dis      2:dis       1  2
  5423      2:dis      2:dis       1  2
  5424      2:dis      2:dis       0.9  2
  5425      2:dis      2:dis       0.933  2
  5426      2:dis      2:dis       0.9  2
  5427      2:dis      2:dis       1  2
  5428      2:dis      2:dis       0.7  2
  5429      2:dis      2:dis       0.9  2
  5430      2:dis      2:dis       0.8  2
  5431      2:dis      2:dis       1  2
  5432      2:dis      2:dis       1  2
  5433      2:dis      2:dis       1  2
  5434      2:dis      2:dis       0.9  2
  5435      2:dis      2:dis       0.9  2
  5436      2:dis      2:dis       0.8  2
  5437      2:dis      2:dis       1  2
  5438      2:dis      2:dis       1  2
  5439      2:dis      2:dis       0.9  2
  5440      2:dis      2:dis       1  2
  5441      2:dis      2:dis       0.7  2
  5442      2:dis      2:dis       0.8  2
  5443      2:dis      2:dis       0.6  2
  5444      2:dis      2:dis       0.9  2
  5445      2:dis      2:dis       0.8  2
  5446      2:dis      2:dis       1  2
  5447      2:dis      2:dis       1  2
  5448      2:dis      2:dis       1  2
  5449      2:dis      2:dis       0.9  2
  5450      2:dis      2:dis       0.9  2
  5451      2:dis      2:dis       1  2
  5452      2:dis      2:dis       0.9  2
  5453      2:dis      2:dis       1  2
  5454      2:dis      2:dis       0.8  2
  5455      2:dis      2:dis       0.7  2
  5456      2:dis      2:dis       1  2
  5457      2:dis      2:dis       1  2
  5458      2:dis      2:dis       0.9  2
  5459      2:dis      2:dis       0.8  2
  5460      2:dis      2:dis       0.8  2
  5461      2:dis      2:dis       0.8  2
  5462      2:dis      2:dis       0.8  2
  5463      2:dis      2:dis       0.9  2
  5464      2:dis      2:dis       0.9  2
  5465      2:dis      2:dis       0.7  2
  5466      2:dis      2:dis       0.6  2
  5467      2:dis      2:dis       0.9  2
  5468      2:dis      2:dis       0.7  2
  5469      2:dis      2:dis       0.9  2
  5470      2:dis      2:dis       1  2
  5471      2:dis      2:dis       1  2
  5472      2:dis      2:dis       1  2
  5473      2:dis      2:dis       0.8  2
  5474      2:dis      2:dis       0.9  2
  5475      2:dis      2:dis       0.8  2
  5476      2:dis      2:dis       0.8  2
  5477      2:dis      2:dis       0.8  2
  5478      2:dis      2:dis       0.7  2
  5479      2:dis      2:dis       0.8  2
  5480      2:dis      2:dis       1  2
  5481      2:dis      2:dis       0.6  2
  5482      2:dis      2:dis       0.9  2
  5483      2:dis      2:dis       1  2
  5484      2:dis      2:dis       0.8  2
  5485      2:dis      2:dis       0.7  2
  5486      2:dis      2:dis       0.9  2
  5487      2:dis      2:dis       0.8  2
  5488      2:dis      2:dis       0.7  2
  5489      2:dis      2:dis       0.7  2
  5490      2:dis      1:ord   +   0.6  1
  5491      2:dis      1:ord   +   0.5  1
  5492      2:dis      1:ord   +   0.6  1
  5493      2:dis      1:ord   +   0.5  1
  5494      2:dis      2:dis       0.8  1
  5495      2:dis      1:ord   +   0.6  1
  5496      2:dis      1:ord   +   0.7  1
  5497      2:dis      2:dis       0.7  1
  5498      2:dis      1:ord   +   0.8  1
  5499      2:dis      2:dis       0.7  1
  5500      2:dis      1:ord   +   0.7  1
  5501      2:dis      2:dis       0.8  1
  5502      2:dis      1:ord   +   0.5  1
  5503      2:dis      1:ord   +   0.5  1
  5504      2:dis      1:ord   +   0.7  1
  5505      2:dis      1:ord   +   0.5  1
  5506      2:dis      1:ord   +   0.5  1
  5507      2:dis      1:ord   +   0.5  1
  5508      2:dis      2:dis       0.8  2
  5509      2:dis      2:dis       0.6  2
  5510      2:dis      2:dis       0.6  2
  5511      2:dis      2:dis       0.7  2
  5512      2:dis      2:dis       0.7  2
  5513      2:dis      1:ord   +   0.6  2
  5514      2:dis      2:dis       0.6  2
  5515      2:dis      2:dis       0.7  2
  5516      2:dis      2:dis       0.7  2
  5517      2:dis      2:dis       0.8  2
  5518      2:dis      2:dis       0.6  2
  5519      2:dis      1:ord   +   0.6  2
  5520      2:dis      1:ord   +   0.6  2
  5521      2:dis      2:dis       0.7  2
  5522      2:dis      1:ord   +   0.5  2
  5523      2:dis      2:dis       0.65  2
  5524      2:dis      1:ord   +   0.5  2
  5525      2:dis      1:ord   +   0.5  2
  5526      2:dis      1:ord   +   0.5  2
  5527      2:dis      2:dis       0.6  2
  5528      2:dis      1:ord   +   0.5  1
  5529      2:dis      1:ord   +   0.7  1
  5530      2:dis      1:ord   +   0.7  1
  5531      2:dis      1:ord   +   0.8  1
  5532      2:dis      1:ord   +   0.7  1
  5533      2:dis      1:ord   +   0.5  1
  5534      2:dis      1:ord   +   0.6  1
  5535      2:dis      1:ord   +   0.6  1
  5536      2:dis      1:ord   +   0.5  1
  5537      2:dis      1:ord   +   0.6  1
  5538      2:dis      2:dis       0.8  1
  5539      2:dis      1:ord   +   0.5  1
  5540      2:dis      1:ord   +   0.5  1
  5541      2:dis      1:ord   +   0.5  1
  5542      2:dis      1:ord   +   0.6  1
  5543      2:dis      2:dis       0.7  1
  5544      2:dis      2:dis       0.7  1
  5545      2:dis      2:dis       0.9  1
  5546      2:dis      2:dis       0.7  1
  5547      2:dis      1:ord   +   0.5  1
  5548      2:dis      2:dis       0.6  1
  5549      2:dis      2:dis       0.8  1
  5550      2:dis      2:dis       0.7  1
  5551      2:dis      1:ord   +   0.6  1
  5552      2:dis      2:dis       1  2
  5553      2:dis      2:dis       1  2
  5554      2:dis      2:dis       0.6  2
  5555      2:dis      2:dis       0.6  2
  5556      2:dis      2:dis       0.7  2
  5557      2:dis      2:dis       0.7  2
  5558      2:dis      2:dis       0.6  2
  5559      2:dis      1:ord   +   0.8  2
  5560      2:dis      1:ord   +   0.5  2
  5561      2:dis      1:ord   +   0.6  2
  5562      2:dis      2:dis       0.6  2
  5563      2:dis      1:ord   +   0.5  2
  5564      2:dis      1:ord   +   0.5  2
  5565      2:dis      1:ord   +   0.5  2
  5566      2:dis      2:dis       0.6  2
  5567      2:dis      2:dis       0.7  2
  5568      2:dis      2:dis       0.8  2
  5569      2:dis      2:dis       0.6  2
  5570      2:dis      2:dis       0.6  2
  5571      2:dis      2:dis       0.7  2
  5572      2:dis      1:ord   +   0.5  2
  5573      2:dis      2:dis       0.6  2
  5574      2:dis      2:dis       0.8  2
  5575      2:dis      2:dis       0.9  2
  5576      2:dis      2:dis       0.6  2
  5577      2:dis      1:ord   +   0.5  2
  5578      2:dis      1:ord   +   0.5  2
  5579      2:dis      2:dis       0.6  2
  5580      2:dis      2:dis       0.8  2
  5581      2:dis      2:dis       0.6  2
  5582      2:dis      1:ord   +   0.5  2
  5583      2:dis      2:dis       0.7  2
  5584      2:dis      2:dis       0.8  2
  5585      2:dis      1:ord   +   0.6  2
  5586      2:dis      2:dis       0.9  2
  5587      2:dis      2:dis       0.7  2
  5588      2:dis      2:dis       1  2
  5589      2:dis      2:dis       0.6  2
  5590      2:dis      2:dis       0.8  2
  5591      2:dis      2:dis       0.8  2
  5592      2:dis      2:dis       0.8  2
  5593      2:dis      2:dis       0.7  2
  5594      2:dis      2:dis       0.7  2
  5595      2:dis      2:dis       0.9  2
  5596      2:dis      2:dis       0.9  2
  5597      2:dis      2:dis       0.8  2
  5598      2:dis      2:dis       0.7  2
  5599      2:dis      2:dis       0.7  2
  5600      2:dis      2:dis       0.6  2
  5601      2:dis      2:dis       0.8  2
  5602      2:dis      2:dis       0.6  2
  5603      2:dis      2:dis       0.6  2
  5604      2:dis      1:ord   +   0.5  2
  5605      2:dis      2:dis       0.7  2
  5606      2:dis      2:dis       0.7  2
  5607      2:dis      2:dis       0.7  2
  5608      2:dis      2:dis       0.6  2
  5609      2:dis      1:ord   +   0.7  2
  5610      2:dis      1:ord   +   0.6  2
  5611      2:dis      2:dis       0.8  2
  5612      2:dis      2:dis       0.7  2
  5613      2:dis      2:dis       0.8  2
  5614      2:dis      1:ord   +   0.6  2
  5615      2:dis      2:dis       0.6  2
  5616      2:dis      1:ord   +   0.5  2
  5617      2:dis      1:ord   +   0.8  2
  5618      2:dis      1:ord   +   0.6  2
  5619      2:dis      2:dis       0.6  2
  5620      2:dis      1:ord   +   0.6  2
  5621      2:dis      2:dis       0.6  2
  5622      2:dis      1:ord   +   0.5  1
  5623      2:dis      1:ord   +   0.8  1
  5624      2:dis      1:ord   +   0.7  1
  5625      2:dis      1:ord   +   0.5  1
  5626      2:dis      1:ord   +   0.6  1
  5627      2:dis      2:dis       0.7  1
  5628      2:dis      2:dis       0.8  1
  5629      2:dis      2:dis       0.8  1
  5630      2:dis      1:ord   +   0.7  1
  5631      1:ord      1:ord       0.6  1
  5632      1:ord      1:ord       0.8  1
  5633      1:ord      1:ord       1  1
  5634      1:ord      1:ord       0.6  1
  5635      1:ord      1:ord       1  1
  5636      1:ord      1:ord       0.9  1
  5637      1:ord      1:ord       0.8  1
  5638      1:ord      1:ord       0.9  1
  5639      1:ord      1:ord       0.8  1
  5640      1:ord      1:ord       0.7  1
  5641      1:ord      1:ord       0.5  1
  5642      1:ord      1:ord       0.9  1
  5643      1:ord      1:ord       0.8  1
  5644      1:ord      1:ord       0.8  1
  5645      1:ord      1:ord       0.6  1
  5646      1:ord      2:dis   +   0.6  1
  5647      1:ord      1:ord       0.7  1
  5648      1:ord      2:dis   +   0.8  2
  5649      1:ord      2:dis   +   0.8  2
  5650      1:ord      2:dis   +   0.8  2
  5651      1:ord      2:dis   +   0.7  2
  5652      1:ord      2:dis   +   0.7  2
  5653      1:ord      2:dis   +   0.6  2
  5654      1:ord      1:ord       0.6  1
  5655      1:ord      1:ord       0.5  1
  5656      1:ord      1:ord       0.7  1
  5657      1:ord      1:ord       0.7  1
  5658      1:ord      1:ord       0.5  1
  5659      1:ord      1:ord       0.6  1
  5660      1:ord      1:ord       0.8  1
  5661      1:ord      1:ord       0.7  1
  5662      1:ord      1:ord       0.8  1
  5663      1:ord      1:ord       0.9  1
  5664      1:ord      1:ord       0.9  1
  5665      1:ord      1:ord       0.7  1
  5666      1:ord      1:ord       0.7  1
  5667      1:ord      1:ord       1  1
  5668      1:ord      1:ord       0.8  1
  5669      1:ord      1:ord       0.6  1
  5670      1:ord      1:ord       0.5  1
  5671      1:ord      1:ord       0.8  1
  5672      1:ord      1:ord       0.8  1
  5673      1:ord      1:ord       0.8  1
  5674      1:ord      1:ord       0.6  1
  5675      1:ord      1:ord       0.8  1
  5676      1:ord      1:ord       0.8  1
  5677      1:ord      1:ord       0.5  1
  5678      1:ord      1:ord       0.5  1
  5679      1:ord      1:ord       0.7  1
  5680      1:ord      1:ord       0.5  1
  5681      1:ord      1:ord       0.8  1
  5682      1:ord      1:ord       0.8  1
  5683      1:ord      1:ord       0.5  1
  5684      1:ord      2:dis   +   0.6  1
  5685      1:ord      1:ord       0.5  1
  5686      1:ord      1:ord       0.6  1
  5687      1:ord      2:dis   +   0.6  1
  5688      1:ord      1:ord       0.5  1
  5689      1:ord      1:ord       0.7  1
  5690      1:ord      1:ord       0.6  1
  5691      1:ord      1:ord       0.6  1
  5692      1:ord      1:ord       0.8  1
  5693      1:ord      1:ord       0.7  1
  5694      1:ord      1:ord       0.9  1
  5695      1:ord      1:ord       0.8  1
  5696      1:ord      2:dis   +   0.6  1
  5697      1:ord      1:ord       0.7  1
  5698      1:ord      1:ord       0.9  1
  5699      1:ord      1:ord       0.8  1
  5700      1:ord      1:ord       0.7  1
  5701      1:ord      1:ord       0.8  1
  5702      1:ord      1:ord       0.8  1
  5703      1:ord      1:ord       0.7  1
  5704      1:ord      1:ord       0.7  1
  5705      1:ord      1:ord       0.7  1
  5706      1:ord      2:dis   +   0.6  1
  5707      1:ord      1:ord       0.6  1
  5708      1:ord      1:ord       0.8  1
  5709      1:ord      1:ord       0.5  1
  5710      1:ord      1:ord       0.8  1
  5711      1:ord      2:dis   +   0.6  1
  5712      1:ord      1:ord       0.5  1
  5713      1:ord      2:dis   +   0.7  1
  5714      1:ord      1:ord       0.5  1
  5715      1:ord      1:ord       0.6  1
  5716      1:ord      1:ord       0.5  1
  5717      1:ord      1:ord       0.9  1
  5718      1:ord      2:dis   +   0.6  1
  5719      1:ord      1:ord       0.5  1
  5720      1:ord      1:ord       0.5  1
  5721      1:ord      1:ord       0.5  1
  5722      1:ord      2:dis   +   0.6  1
  5723      1:ord      1:ord       0.6  1
  5724      1:ord      2:dis   +   0.8  1
  5725      1:ord      1:ord       0.5  1
  5726      1:ord      2:dis   +   0.6  1
  5727      1:ord      1:ord       0.5  1
  5728      1:ord      2:dis   +   0.7  1
  5729      1:ord      1:ord       0.5  1
  5730      1:ord      1:ord       0.7  1
  5731      1:ord      1:ord       0.5  1
  5732      1:ord      2:dis   +   0.8  1
  5733      1:ord      1:ord       0.5  1
  5734      1:ord      2:dis   +   0.6  1
  5735      1:ord      2:dis   +   0.7  1
  5736      1:ord      1:ord       0.5  1
  5737      1:ord      2:dis   +   0.7  1
  5738      1:ord      2:dis   +   0.6  1
  5739      1:ord      1:ord       0.6  1
  5740      2:dis      1:ord   +   0.5  1
  5741      2:dis      1:ord   +   0.8  1
  5742      2:dis      1:ord   +   0.5  1
  5743      2:dis      1:ord   +   0.7  1
  5744      2:dis      1:ord   +   0.8  1
  5745      2:dis      1:ord   +   0.7  1
  5746      2:dis      1:ord   +   0.7  1
  5747      1:ord      1:ord       0.5  1
  5748      1:ord      1:ord       0.5  1
  5749      1:ord      1:ord       0.7  1
  5750      1:ord      1:ord       0.7  1
  5751      1:ord      1:ord       0.5  1
  5752      1:ord      2:dis   +   0.6  1
  5753      1:ord      1:ord       0.9  1
  5754      1:ord      1:ord       0.6  1
  5755      1:ord      1:ord       0.6  1
  5756      1:ord      1:ord       0.7  1
  5757      1:ord      1:ord       0.8  1
  5758      1:ord      1:ord       0.6  1
  5759      1:ord      1:ord       0.8  1
  5760      1:ord      1:ord       0.6  1
  5761      1:ord      1:ord       0.8  1
  5762      1:ord      1:ord       0.7  1
  5763      1:ord      1:ord       0.6  1
  5764      1:ord      1:ord       0.8  1
  5765      1:ord      1:ord       1  1
  5766      1:ord      1:ord       1  1
  5767      1:ord      1:ord       0.7  1
  5768      1:ord      1:ord       0.7  1
  5769      1:ord      1:ord       0.8  1
  5770      1:ord      1:ord       0.7  1
  5771      1:ord      1:ord       0.7  1
  5772      1:ord      1:ord       0.5  1
  5773      1:ord      1:ord       0.7  1
  5774      1:ord      1:ord       0.9  1
  5775      1:ord      2:dis   +   0.6  1
  5776      2:dis      1:ord   +   0.7  1
  5777      2:dis      2:dis       0.6  1
  5778      2:dis      1:ord   +   0.6  1
  5779      2:dis      1:ord   +   0.8  1
  5780      2:dis      1:ord   +   0.7  1
  5781      2:dis      1:ord   +   0.8  1
  5782      2:dis      1:ord   +   0.7  1
  5783      2:dis      1:ord   +   0.8  1
  5784      2:dis      1:ord   +   0.6  1
  5785      2:dis      1:ord   +   0.8  1
  5786      2:dis      1:ord   +   0.5  1
  5787      2:dis      1:ord   +   0.5  1
  5788      1:ord      1:ord       0.8  1
  5789      1:ord      1:ord       0.7  1
  5790      1:ord      1:ord       0.8  1
  5791      1:ord      1:ord       0.7  1
  5792      1:ord      1:ord       0.5  1
  5793      1:ord      1:ord       0.7  1
  5794      1:ord      1:ord       0.6  1
  5795      1:ord      1:ord       0.7  1
  5796      1:ord      1:ord       0.5  1
  5797      1:ord      1:ord       0.7  1
  5798      1:ord      1:ord       0.8  1
  5799      1:ord      1:ord       0.8  1
  5800      1:ord      1:ord       0.7  1
  5801      1:ord      2:dis   +   0.6  1
  5802      1:ord      1:ord       0.8  1
  5803      1:ord      2:dis   +   0.7  1
  5804      1:ord      1:ord       0.7  1
  5805      1:ord      1:ord       0.6  1
  5806      1:ord      1:ord       0.5  1
  5807      1:ord      1:ord       0.5  1
  5808      1:ord      1:ord       0.8  1
  5809      1:ord      2:dis   +   0.6  1
  5810      1:ord      1:ord       0.55  1
  5811      1:ord      1:ord       0.5  1
  5812      1:ord      1:ord       0.9  1
  5813      1:ord      1:ord       0.8  1
  5814      1:ord      1:ord       0.7  1
  5815      1:ord      1:ord       0.7  1
  5816      1:ord      1:ord       0.5  1
  5817      1:ord      1:ord       0.5  1
  5818      1:ord      1:ord       0.5  1
  5819      1:ord      1:ord       0.7  1
  5820      1:ord      1:ord       0.7  1
  5821      1:ord      2:dis   +   0.6  1
  5822      1:ord      1:ord       0.5  1
  5823      1:ord      1:ord       0.6  1
  5824      1:ord      1:ord       0.6  1
  5825      1:ord      2:dis   +   0.7  1
  5826      1:ord      1:ord       0.6  1
  5827      1:ord      1:ord       0.9  1
  5828      1:ord      1:ord       0.6  1
  5829      1:ord      2:dis   +   0.6  1
  5830      1:ord      2:dis   +   0.6  1
  5831      1:ord      1:ord       0.5  1
  5832      1:ord      1:ord       0.5  1
  5833      1:ord      1:ord       0.5  1
  5834      1:ord      1:ord       0.7  1
  5835      1:ord      1:ord       0.7  1
  5836      1:ord      1:ord       0.6  1
  5837      1:ord      1:ord       0.6  1
  5838      1:ord      1:ord       0.5  1
  5839      1:ord      1:ord       0.7  1
  5840      1:ord      1:ord       0.7  1
  5841      1:ord      1:ord       0.6  1
  5842      1:ord      1:ord       0.6  1
  5843      1:ord      1:ord       0.5  1
  5844      1:ord      2:dis   +   0.6  1
  5845      1:ord      1:ord       0.8  1
  5846      1:ord      1:ord       0.6  1
  5847      1:ord      1:ord       0.5  1
  5848      1:ord      1:ord       0.5  1
  5849      1:ord      2:dis   +   0.6  1
  5850      1:ord      1:ord       0.8  1
  5851      1:ord      1:ord       0.6  1
  5852      1:ord      1:ord       0.6  1
  5853      1:ord      1:ord       0.5  1
  5854      1:ord      1:ord       0.5  1
  5855      1:ord      1:ord       0.5  1
  5856      1:ord      1:ord       0.5  1
  5857      1:ord      1:ord       0.5  1
  5858      1:ord      1:ord       0.5  1
  5859      1:ord      1:ord       0.7  1
  5860      1:ord      2:dis   +   0.7  1
  5861      1:ord      2:dis   +   0.6  1
  5862      1:ord      1:ord       0.5  1
  5863      1:ord      1:ord       0.5  1
  5864      1:ord      1:ord       0.5  1
  5865      1:ord      2:dis   +   0.7  2
  5866      1:ord      2:dis   +   0.6  2
  5867      1:ord      2:dis   +   0.6  2
  5868      1:ord      2:dis   +   0.7  2
  5869      1:ord      2:dis   +   0.6  2
  5870      1:ord      1:ord       0.6  2
  5871      1:ord      1:ord       0.5  2
  5872      1:ord      2:dis   +   0.7  2
  5873      1:ord      1:ord       0.6  1
  5874      1:ord      1:ord       0.6  1
  5875      1:ord      1:ord       0.7  1
  5876      1:ord      1:ord       0.5  1
  5877      1:ord      1:ord       0.5  1
  5878      1:ord      1:ord       0.6  1
  5879      1:ord      1:ord       0.6  1
  5880      1:ord      1:ord       0.7  1
  5881      1:ord      1:ord       0.5  1
  5882      1:ord      1:ord       0.733  1
  5883      1:ord      1:ord       0.5  1
  5884      1:ord      1:ord       0.7  1
  5885      1:ord      1:ord       0.5  1
  5886      1:ord      1:ord       0.6  1
  5887      1:ord      2:dis   +   0.6  1
  5888      1:ord      1:ord       0.7  1
  5889      1:ord      1:ord       0.5  1
  5890      1:ord      1:ord       0.5  1
  5891      1:ord      2:dis   +   0.55  1
  5892      1:ord      1:ord       0.7  1
  5893      1:ord      1:ord       0.7  1
  5894      1:ord      1:ord       0.5  1
  5895      1:ord      2:dis   +   0.7  1
  5896      1:ord      1:ord       0.7  1
  5897      1:ord      2:dis   +   0.7  1
  5898      1:ord      2:dis   +   0.85  1
  5899      1:ord      1:ord       0.5  1
  5900      1:ord      2:dis   +   0.9  1
  5901      1:ord      1:ord       0.5  1
  5902      1:ord      2:dis   +   0.767  2
  5903      1:ord      2:dis   +   0.6  2
  5904      1:ord      2:dis   +   0.9  2
  5905      1:ord      2:dis   +   0.6  2
  5906      1:ord      2:dis   +   0.8  2
  5907      1:ord      1:ord       0.5  2
  5908      1:ord      2:dis   +   0.6  2
  5909      1:ord      2:dis   +   0.8  2
  5910      1:ord      2:dis   +   0.8  2
  5911      1:ord      1:ord       0.5  2
  5912      1:ord      1:ord       0.6  2
  5913      1:ord      2:dis   +   0.7  2
  5914      1:ord      2:dis   +   0.6  2
  5915      1:ord      1:ord       0.7  2
  5916      1:ord      2:dis   +   0.7  2
  5917      1:ord      1:ord       0.8  1
  5918      1:ord      1:ord       0.6  1
  5919      1:ord      1:ord       0.7  1
  5920      1:ord      1:ord       0.7  1
  5921      1:ord      1:ord       0.5  1
  5922      1:ord      1:ord       0.5  1
  5923      1:ord      2:dis   +   0.6  1
  5924      1:ord      1:ord       0.8  1
  5925      1:ord      1:ord       0.5  1
  5926      1:ord      1:ord       0.8  1
  5927      1:ord      1:ord       0.7  1
  5928      1:ord      1:ord       0.8  1
  5929      1:ord      1:ord       0.8  1
  5930      1:ord      1:ord       0.7  1
  5931      1:ord      1:ord       0.5  1
  5932      1:ord      1:ord       0.7  1
  5933      1:ord      1:ord       0.7  1
  5934      1:ord      1:ord       0.5  1
  5935      1:ord      2:dis   +   0.7  1
  5936      1:ord      1:ord       0.5  1
  5937      1:ord      1:ord       0.9  1
  5938      1:ord      1:ord       0.6  1
  5939      1:ord      1:ord       0.9  1
  5940      1:ord      1:ord       0.7  1
  5941      1:ord      1:ord       0.7  1
  5942      1:ord      1:ord       0.8  1
  5943      1:ord      1:ord       0.7  1
  5944      1:ord      1:ord       0.6  1
  5945      1:ord      1:ord       0.6  1
  5946      1:ord      1:ord       0.6  1
  5947      1:ord      1:ord       0.8  1
  5948      1:ord      1:ord       0.7  1
  5949      1:ord      1:ord       0.6  1
  5950      1:ord      2:dis   +   0.6  1
  5951      1:ord      1:ord       0.8  1
  5952      1:ord      2:dis   +   0.533  1
  5953      1:ord      1:ord       0.7  1
  5954      1:ord      2:dis   +   0.6  1
  5955      1:ord      1:ord       0.5  1
  5956      1:ord      2:dis   +   0.6  1
  5957      1:ord      1:ord       0.7  1
  5958      1:ord      1:ord       0.6  1
  5959      1:ord      1:ord       0.6  1
  5960      1:ord      1:ord       0.7  1
  5961      1:ord      1:ord       0.5  1
  5962      1:ord      1:ord       0.7  1
  5963      1:ord      1:ord       0.6  1
  5964      1:ord      1:ord       0.5  1
  5965      1:ord      2:dis   +   0.6  1
  5966      1:ord      1:ord       0.8  1
  5967      1:ord      1:ord       0.7  1
  5968      1:ord      1:ord       0.7  1
  5969      1:ord      1:ord       0.8  1
  5970      1:ord      1:ord       0.8  1
  5971      1:ord      1:ord       0.8  1
  5972      1:ord      1:ord       0.7  1
  5973      1:ord      1:ord       0.9  1
  5974      1:ord      1:ord       0.9  1
  5975      1:ord      1:ord       0.7  1
  5976      1:ord      1:ord       0.8  1
  5977      1:ord      1:ord       0.7  1
  5978      1:ord      1:ord       0.7  1
  5979      1:ord      1:ord       0.7  1
  5980      1:ord      1:ord       0.9  1
  5981      1:ord      1:ord       0.8  1
  5982      1:ord      1:ord       0.9  1
  5983      1:ord      1:ord       0.9  1
  5984      1:ord      1:ord       0.9  1
  5985      1:ord      1:ord       0.8  1
  5986      1:ord      1:ord       0.8  1
  5987      1:ord      1:ord       0.9  1
  5988      1:ord      1:ord       0.7  1
  5989      1:ord      1:ord       0.7  1
  5990      1:ord      1:ord       0.8  1
  5991      1:ord      1:ord       0.8  1
  5992      1:ord      1:ord       0.7  1
  5993      1:ord      1:ord       0.5  1
  5994      1:ord      1:ord       0.6  1
  5995      1:ord      1:ord       0.8  1
  5996      1:ord      1:ord       0.7  1
  5997      1:ord      1:ord       0.9  1
  5998      1:ord      1:ord       0.6  1
  5999      1:ord      2:dis   +   0.6  1
  6000      1:ord      1:ord       0.5  1
  6001      1:ord      2:dis   +   0.6  1
  6002      1:ord      2:dis   +   0.6  1
  6003      1:ord      2:dis   +   0.6  1
  6004      1:ord      1:ord       0.7  1
  6005      1:ord      1:ord       0.5  1
  6006      1:ord      1:ord       0.6  1
  6007      1:ord      2:dis   +   0.6  1
  6008      1:ord      1:ord       0.5  1
  6009      1:ord      1:ord       0.5  1
  6010      1:ord      1:ord       0.9  1
  6011      1:ord      1:ord       0.6  1
  6012      1:ord      2:dis   +   0.7  1
  6013      1:ord      1:ord       0.8  1
  6014      1:ord      1:ord       0.8  1
  6015      1:ord      1:ord       0.9  1
  6016      1:ord      1:ord       0.7  1
  6017      1:ord      1:ord       0.6  1
  6018      1:ord      1:ord       0.9  1
  6019      1:ord      1:ord       0.9  1
  6020      1:ord      1:ord       0.5  1
  6021      1:ord      1:ord       0.8  1
  6022      1:ord      1:ord       0.8  1
  6023      1:ord      1:ord       0.6  1
  6024      1:ord      1:ord       0.8  1
  6025      1:ord      1:ord       0.8  1
  6026      1:ord      1:ord       0.6  1
  6027      1:ord      1:ord       0.7  1
  6028      1:ord      1:ord       0.8  1
  6029      1:ord      1:ord       0.8  1
  6030      1:ord      1:ord       0.9  1
  6031      1:ord      1:ord       0.7  1
  6032      1:ord      1:ord       0.8  1
  6033      1:ord      1:ord       0.6  1
  6034      1:ord      1:ord       0.6  1
  6035      1:ord      1:ord       0.5  1
  6036      1:ord      1:ord       0.6  1
  6037      1:ord      1:ord       0.5  1
  6038      1:ord      1:ord       0.5  1
  6039      1:ord      1:ord       0.8  1
  6040      1:ord      1:ord       0.8  1
  6041      1:ord      1:ord       0.6  1
  6042      1:ord      1:ord       0.6  1
  6043      1:ord      1:ord       0.5  1
  6044      1:ord      1:ord       0.6  1
  6045      1:ord      1:ord       0.7  1
  6046      1:ord      1:ord       0.7  1
  6047      1:ord      1:ord       0.6  1
  6048      1:ord      1:ord       0.5  1
  6049      1:ord      1:ord       0.7  1
  6050      1:ord      1:ord       0.7  1
  6051      1:ord      2:dis   +   0.55  1
  6052      1:ord      2:dis   +   0.6  1
  6053      1:ord      1:ord       0.7  1
  6054      1:ord      1:ord       0.6  1
  6055      1:ord      1:ord       0.7  1
  6056      1:ord      1:ord       0.8  1
  6057      1:ord      1:ord       0.5  1
  6058      1:ord      2:dis   +   0.6  1
  6059      1:ord      1:ord       0.6  1
  6060      1:ord      1:ord       0.8  1
  6061      1:ord      1:ord       0.7  1
  6062      1:ord      1:ord       0.6  1
  6063      1:ord      1:ord       0.6  1
  6064      1:ord      1:ord       1  1
  6065      1:ord      1:ord       0.7  1
  6066      1:ord      1:ord       0.7  1
  6067      1:ord      1:ord       0.7  1
  6068      1:ord      1:ord       0.9  1
  6069      1:ord      1:ord       0.8  1
  6070      1:ord      1:ord       0.9  1
  6071      1:ord      1:ord       1  1
  6072      1:ord      1:ord       0.5  1
  6073      1:ord      1:ord       1  1
  6074      1:ord      1:ord       0.7  1
  6075      1:ord      1:ord       0.8  1
  6076      1:ord      1:ord       0.9  1
  6077      1:ord      1:ord       0.8  1
  6078      1:ord      1:ord       0.9  1
  6079      1:ord      1:ord       0.8  1
  6080      1:ord      1:ord       0.9  1
  6081      1:ord      1:ord       0.5  1
  6082      1:ord      1:ord       0.8  1
  6083      1:ord      1:ord       0.5  1
  6084      1:ord      1:ord       0.7  1
  6085      1:ord      1:ord       0.6  1
  6086      1:ord      1:ord       0.7  1
  6087      1:ord      1:ord       0.8  1
  6088      1:ord      1:ord       0.6  1
  6089      1:ord      1:ord       0.5  1
  6090      1:ord      2:dis   +   0.6  1
  6091      1:ord      2:dis   +   0.6  1
  6092      1:ord      1:ord       0.5  1
  6093      1:ord      1:ord       0.8  1
  6094      1:ord      1:ord       0.5  1
  6095      1:ord      1:ord       0.6  1
  6096      1:ord      1:ord       0.7  1
  6097      1:ord      2:dis   +   0.6  1
  6098      1:ord      1:ord       1  1
  6099      1:ord      2:dis   +   0.6  1
  6100      1:ord      2:dis   +   0.8  1
  6101      1:ord      2:dis   +   0.8  2
  6102      1:ord      2:dis   +   0.7  2
  6103      1:ord      1:ord       0.6  1
  6104      1:ord      1:ord       0.6  1
  6105      1:ord      2:dis   +   0.7  2
  6106      1:ord      2:dis   +   0.8  2
  6107      1:ord      2:dis   +   0.8  2
  6108      1:ord      2:dis   +   0.6  2
  6109      1:ord      1:ord       0.5  2
  6110      1:ord      2:dis   +   0.6  2
  6111      1:ord      1:ord       0.6  2
  6112      1:ord      2:dis   +   0.8  2
  6113      1:ord      1:ord       0.7  1
  6114      1:ord      1:ord       0.7  1
  6115      1:ord      1:ord       0.6  1
  6116      1:ord      1:ord       0.6  1
  6117      1:ord      1:ord       0.8  1
  6118      1:ord      1:ord       0.7  1
  6119      1:ord      1:ord       0.8  1
  6120      1:ord      1:ord       0.9  1
  6121      1:ord      1:ord       0.7  1
  6122      1:ord      1:ord       0.6  1
  6123      1:ord      1:ord       0.9  1
  6124      1:ord      1:ord       1  1
  6125      1:ord      1:ord       0.6  1
  6126      1:ord      1:ord       0.7  1
  6127      1:ord      1:ord       0.8  1
  6128      1:ord      1:ord       0.6  1
  6129      1:ord      1:ord       0.6  1
  6130      1:ord      1:ord       0.7  1
  6131      1:ord      1:ord       0.5  1
  6132      1:ord      2:dis   +   0.6  1
  6133      1:ord      1:ord       0.7  1
  6134      1:ord      2:dis   +   0.6  1
  6135      1:ord      1:ord       0.9  1
  6136      1:ord      1:ord       0.7  1
  6137      1:ord      1:ord       0.7  1
  6138      1:ord      1:ord       0.6  1
  6139      1:ord      1:ord       0.8  1
  6140      1:ord      1:ord       0.6  1
  6141      1:ord      1:ord       0.6  1
  6142      1:ord      1:ord       0.5  1
  6143      1:ord      1:ord       0.6  1
  6144      1:ord      1:ord       0.7  1
  6145      1:ord      1:ord       0.7  1
  6146      1:ord      1:ord       0.7  1
  6147      1:ord      1:ord       0.8  1
  6148      1:ord      1:ord       0.6  1
  6149      1:ord      1:ord       0.8  1
  6150      1:ord      1:ord       0.7  1
  6151      1:ord      1:ord       0.9  1
  6152      1:ord      1:ord       0.8  1
  6153      1:ord      1:ord       0.5  1
  6154      1:ord      1:ord       0.7  1
  6155      1:ord      1:ord       0.7  1
  6156      1:ord      1:ord       0.9  1
  6157      1:ord      1:ord       0.7  1
  6158      1:ord      1:ord       0.6  1
  6159      1:ord      1:ord       0.5  1
  6160      1:ord      1:ord       0.6  1
  6161      1:ord      1:ord       0.9  1
  6162      1:ord      1:ord       0.7  1
  6163      1:ord      1:ord       0.6  1
  6164      1:ord      1:ord       0.7  1
  6165      1:ord      1:ord       0.8  1
  6166      1:ord      1:ord       0.6  1
  6167      1:ord      1:ord       0.6  1
  6168      1:ord      2:dis   +   0.6  1
  6169      1:ord      1:ord       0.6  1
  6170      1:ord      1:ord       0.6  1
  6171      1:ord      2:dis   +   0.7  1
  6172      1:ord      2:dis   +   0.6  1
  6173      1:ord      1:ord       0.6  1
  6174      2:dis      2:dis       0.9  2
  6175      2:dis      2:dis       0.8  2
  6176      2:dis      2:dis       0.8  2
  6177      2:dis      2:dis       0.8  2
  6178      2:dis      1:ord   +   0.5  2
  6179      2:dis      2:dis       0.7  2
  6180      2:dis      2:dis       0.6  2
  6181      2:dis      2:dis       0.8  2
  6182      2:dis      2:dis       0.6  2
  6183      2:dis      2:dis       0.7  2
  6184      2:dis      2:dis       0.8  2
  6185      2:dis      2:dis       0.9  2
  6186      2:dis      2:dis       0.8  2
  6187      2:dis      2:dis       1  2
  6188      2:dis      2:dis       1  2
  6189      2:dis      2:dis       0.7  2
  6190      2:dis      2:dis       0.7  2
  6191      2:dis      1:ord   +   0.6  2
  6192      2:dis      2:dis       0.7  2
  6193      2:dis      2:dis       0.6  2
  6194      2:dis      2:dis       0.8  2
  6195      2:dis      2:dis       0.9  2
  6196      2:dis      2:dis       0.8  2
  6197      2:dis      2:dis       0.6  2
  6198      2:dis      2:dis       0.9  2
  6199      2:dis      2:dis       0.9  2
  6200      2:dis      1:ord   +   0.5  2
  6201      2:dis      2:dis       0.667  2
  6202      2:dis      2:dis       0.8  2
  6203      2:dis      2:dis       0.6  2
  6204      2:dis      2:dis       0.7  2
  6205      2:dis      2:dis       0.65  2
  6206      2:dis      2:dis       0.6  2
  6207      2:dis      2:dis       0.7  2
  6208      2:dis      2:dis       0.7  2
  6209      2:dis      2:dis       0.8  2
  6210      2:dis      2:dis       0.8  2
  6211      2:dis      2:dis       0.8  2
  6212      2:dis      2:dis       0.7  2
  6213      2:dis      2:dis       0.7  2
  6214      2:dis      2:dis       0.8  2
  6215      2:dis      2:dis       0.8  2
  6216      2:dis      2:dis       0.9  2
  6217      2:dis      2:dis       1  2
  6218      2:dis      2:dis       0.6  2
  6219      2:dis      2:dis       0.6  2
  6220      2:dis      2:dis       0.6  2
  6221      2:dis      2:dis       1  2
  6222      2:dis      2:dis       0.8  2
  6223      2:dis      2:dis       0.8  2
  6224      2:dis      2:dis       0.7  2
  6225      2:dis      2:dis       0.8  2
  6226      2:dis      2:dis       0.9  2
  6227      2:dis      2:dis       0.8  2
  6228      2:dis      2:dis       1  2
  6229      2:dis      2:dis       0.8  2
  6230      2:dis      2:dis       0.9  2
  6231      2:dis      2:dis       0.9  2
  6232      2:dis      2:dis       0.9  2
  6233      2:dis      2:dis       0.9  2
  6234      2:dis      2:dis       0.7  2
  6235      2:dis      2:dis       1  2
  6236      2:dis      2:dis       0.9  2
  6237      2:dis      2:dis       0.9  2
  6238      2:dis      2:dis       0.967  2
  6239      2:dis      2:dis       0.8  2
  6240      2:dis      2:dis       0.9  2
  6241      2:dis      2:dis       0.9  2
  6242      2:dis      2:dis       0.8  2
  6243      2:dis      2:dis       0.7  2
  6244      2:dis      2:dis       0.9  2
  6245      2:dis      2:dis       0.8  2
  6246      2:dis      2:dis       0.7  2
  6247      2:dis      2:dis       0.9  2
  6248      2:dis      2:dis       1  2
  6249      2:dis      2:dis       0.9  2
  6250      2:dis      2:dis       0.9  2
  6251      2:dis      2:dis       0.9  2
  6252      2:dis      2:dis       0.9  2
  6253      2:dis      2:dis       1  2
  6254      2:dis      2:dis       0.9  2
  6255      2:dis      2:dis       0.9  2
  6256      2:dis      2:dis       1  2
  6257      2:dis      2:dis       1  2
  6258      2:dis      2:dis       1  2
  6259      2:dis      2:dis       1  2
  6260      2:dis      2:dis       1  2
  6261      2:dis      2:dis       1  2
  6262      2:dis      2:dis       0.8  2
  6263      2:dis      2:dis       1  2
  6264      2:dis      2:dis       1  2
  6265      2:dis      2:dis       1  2
  6266      2:dis      2:dis       0.8  2
  6267      2:dis      2:dis       0.9  2
  6268      2:dis      2:dis       0.9  2
  6269      2:dis      2:dis       0.8  2
  6270      2:dis      2:dis       0.9  2
  6271      2:dis      2:dis       0.9  2
  6272      2:dis      2:dis       1  2
  6273      2:dis      2:dis       1  2
  6274      2:dis      2:dis       1  2
  6275      2:dis      2:dis       1  2
  6276      2:dis      2:dis       1  2
  6277      2:dis      2:dis       0.9  2
  6278      2:dis      2:dis       0.9  2
  6279      2:dis      2:dis       0.9  2
  6280      2:dis      2:dis       0.9  2
  6281      2:dis      2:dis       0.9  2
  6282      2:dis      2:dis       1  2
  6283      2:dis      2:dis       0.8  2
  6284      2:dis      2:dis       0.9  2
  6285      2:dis      2:dis       1  2
  6286      2:dis      2:dis       1  2
  6287      2:dis      2:dis       1  2
  6288      2:dis      2:dis       1  2
  6289      2:dis      2:dis       0.8  2
  6290      2:dis      2:dis       0.8  2
  6291      2:dis      2:dis       0.9  2
  6292      2:dis      2:dis       1  2
  6293      2:dis      2:dis       0.8  2
  6294      2:dis      2:dis       0.9  2
  6295      2:dis      2:dis       1  2
  6296      2:dis      2:dis       0.9  2
  6297      2:dis      2:dis       0.8  2
  6298      2:dis      2:dis       1  2
  6299      2:dis      2:dis       1  2
  6300      2:dis      2:dis       0.9  2
  6301      2:dis      2:dis       1  2
  6302      2:dis      2:dis       1  2
  6303      2:dis      2:dis       0.95  2
  6304      2:dis      2:dis       0.9  2
  6305      2:dis      2:dis       0.9  2
  6306      2:dis      2:dis       0.9  2
  6307      2:dis      2:dis       0.8  2
  6308      2:dis      2:dis       1  2
  6309      2:dis      2:dis       0.8  2
  6310      2:dis      2:dis       0.9  2
  6311      2:dis      2:dis       0.8  2
  6312      2:dis      2:dis       1  2
  6313      2:dis      2:dis       0.9  2
  6314      2:dis      2:dis       0.8  2
  6315      2:dis      2:dis       1  2
  6316      2:dis      2:dis       1  2
  6317      2:dis      2:dis       1  2
  6318      2:dis      2:dis       1  2
  6319      2:dis      2:dis       0.8  2
  6320      2:dis      2:dis       0.7  2
  6321      2:dis      2:dis       1  2
  6322      2:dis      2:dis       0.9  2
  6323      2:dis      2:dis       0.9  2
  6324      2:dis      2:dis       0.9  2
  6325      2:dis      2:dis       1  2
  6326      2:dis      2:dis       1  2
  6327      2:dis      2:dis       0.9  2
  6328      2:dis      2:dis       0.8  2
  6329      2:dis      2:dis       0.9  2
  6330      2:dis      2:dis       0.9  2
  6331      2:dis      2:dis       1  2
  6332      2:dis      2:dis       0.9  2
  6333      2:dis      2:dis       0.9  2
  6334      2:dis      2:dis       0.9  2
  6335      2:dis      2:dis       0.9  2
  6336      2:dis      2:dis       0.76  2
  6337      2:dis      2:dis       0.8  2
  6338      2:dis      2:dis       0.8  2
  6339      2:dis      2:dis       0.8  2
  6340      2:dis      2:dis       0.7  2
  6341      2:dis      2:dis       0.9  2
  6342      2:dis      2:dis       0.9  2
  6343      2:dis      2:dis       0.9  2
  6344      2:dis      2:dis       1  2
  6345      2:dis      2:dis       0.6  2
  6346      2:dis      2:dis       1  2
  6347      2:dis      2:dis       1  2
  6348      2:dis      2:dis       0.9  2
  6349      2:dis      2:dis       1  2
  6350      2:dis      2:dis       0.7  2
  6351      2:dis      2:dis       0.9  2
  6352      2:dis      2:dis       0.8  2
  6353      2:dis      2:dis       1  2
  6354      2:dis      2:dis       1  2
  6355      2:dis      2:dis       0.9  2
  6356      2:dis      2:dis       0.9  2
  6357      2:dis      2:dis       0.9  2
  6358      2:dis      2:dis       0.8  2
  6359      2:dis      2:dis       0.9  2
  6360      2:dis      2:dis       0.8  2
  6361      2:dis      2:dis       0.7  2
  6362      2:dis      2:dis       0.9  2
  6363      2:dis      2:dis       1  2
  6364      2:dis      2:dis       1  2
  6365      2:dis      2:dis       0.9  2
  6366      2:dis      2:dis       0.7  2
  6367      2:dis      2:dis       1  2
  6368      2:dis      2:dis       0.9  2
  6369      2:dis      2:dis       0.7  2
  6370      2:dis      2:dis       0.8  2
  6371      2:dis      2:dis       0.9  2
  6372      2:dis      2:dis       0.7  2
  6373      2:dis      2:dis       1  2
  6374      2:dis      2:dis       0.9  2
  6375      2:dis      2:dis       1  2
  6376      2:dis      2:dis       0.95  2
  6377      2:dis      2:dis       0.7  2
  6378      2:dis      2:dis       0.8  2
  6379      2:dis      2:dis       0.8  2
  6380      2:dis      2:dis       0.7  2
  6381      2:dis      2:dis       0.8  2
  6382      2:dis      2:dis       0.7  2
  6383      2:dis      2:dis       0.8  2
  6384      2:dis      2:dis       0.9  2
  6385      2:dis      2:dis       1  2
  6386      2:dis      2:dis       0.7  2
  6387      2:dis      2:dis       0.9  2
  6388      2:dis      2:dis       0.9  2
  6389      2:dis      2:dis       0.9  2
  6390      2:dis      2:dis       1  2
  6391      2:dis      2:dis       0.9  2
  6392      2:dis      2:dis       1  2
  6393      2:dis      2:dis       1  2
  6394      2:dis      2:dis       0.9  2
  6395      2:dis      2:dis       1  2
  6396      2:dis      2:dis       0.9  2
  6397      2:dis      2:dis       1  2
  6398      2:dis      2:dis       1  2
  6399      2:dis      2:dis       0.7  2
  6400      2:dis      2:dis       0.8  2
  6401      2:dis      2:dis       0.9  2
  6402      2:dis      2:dis       1  2
  6403      2:dis      2:dis       0.8  2
  6404      2:dis      2:dis       0.8  2
  6405      2:dis      2:dis       0.9  2
  6406      2:dis      2:dis       0.9  2
  6407      2:dis      2:dis       1  2
  6408      2:dis      2:dis       1  2
  6409      2:dis      2:dis       0.9  2
  6410      2:dis      2:dis       0.9  2
  6411      2:dis      2:dis       0.9  2
  6412      2:dis      2:dis       0.8  2
  6413      2:dis      2:dis       0.9  2
  6414      2:dis      2:dis       1  2
  6415      2:dis      2:dis       1  2
  6416      2:dis      2:dis       0.9  2
  6417      2:dis      2:dis       0.7  2
  6418      2:dis      2:dis       1  2
  6419      2:dis      2:dis       0.8  2
  6420      2:dis      2:dis       1  2
  6421      2:dis      2:dis       1  2
  6422      2:dis      2:dis       0.6  2
  6423      2:dis      2:dis       0.9  2
  6424      2:dis      2:dis       0.9  2
  6425      2:dis      2:dis       0.7  2
  6426      2:dis      2:dis       1  2
  6427      2:dis      2:dis       0.9  2
  6428      2:dis      2:dis       0.8  2
  6429      2:dis      2:dis       0.7  2
  6430      2:dis      2:dis       0.8  2
  6431      2:dis      2:dis       1  2
  6432      2:dis      2:dis       1  2
  6433      2:dis      2:dis       0.9  2
  6434      2:dis      2:dis       0.8  2
  6435      2:dis      2:dis       0.9  2
  6436      2:dis      2:dis       0.9  2
  6437      2:dis      2:dis       0.9  2
  6438      2:dis      2:dis       0.95  2
  6439      2:dis      2:dis       0.9  2
  6440      2:dis      2:dis       0.7  2
  6441      2:dis      2:dis       0.8  2
  6442      2:dis      2:dis       0.9  2
  6443      2:dis      2:dis       0.9  2
  6444      2:dis      2:dis       1  2
  6445      2:dis      2:dis       1  2
  6446      2:dis      2:dis       0.9  2
  6447      2:dis      2:dis       0.9  2
  6448      2:dis      2:dis       1  2
  6449      2:dis      2:dis       1  2
  6450      2:dis      2:dis       0.7  2
  6451      2:dis      2:dis       0.9  2
  6452      2:dis      2:dis       1  2
  6453      2:dis      2:dis       0.8  2
  6454      2:dis      2:dis       1  2
  6455      2:dis      2:dis       0.9  2
  6456      2:dis      2:dis       0.9  2
  6457      2:dis      2:dis       0.9  2
  6458      2:dis      2:dis       0.7  2
  6459      2:dis      2:dis       0.7  2
  6460      2:dis      2:dis       1  2
  6461      2:dis      2:dis       0.9  2
  6462      2:dis      2:dis       0.9  2
  6463      2:dis      2:dis       0.9  2
  6464      2:dis      2:dis       0.9  2
  6465      2:dis      2:dis       0.9  2
  6466      2:dis      2:dis       0.9  2
  6467      2:dis      2:dis       0.7  2
  6468      2:dis      2:dis       0.6  2
  6469      2:dis      2:dis       0.9  2
  6470      2:dis      2:dis       0.7  2
  6471      2:dis      2:dis       0.8  2
  6472      2:dis      2:dis       0.7  2
  6473      2:dis      2:dis       0.8  2
  6474      2:dis      1:ord   +   0.5  1
  6475      2:dis      1:ord   +   0.5  1
  6476      2:dis      1:ord   +   0.7  1
  6477      2:dis      1:ord   +   0.5  1
  6478      2:dis      1:ord   +   0.7  1
  6479      2:dis      2:dis       0.6  1
  6480      2:dis      1:ord   +   0.5  1
  6481      2:dis      1:ord   +   0.7  1
  6482      2:dis      1:ord   +   0.7  1
  6483      2:dis      1:ord   +   0.7  1
  6484      2:dis      1:ord   +   0.8  1
  6485      2:dis      2:dis       0.6  1
  6486      2:dis      1:ord   +   0.8  1
  6487      2:dis      1:ord   +   0.6  1
  6488      2:dis      1:ord   +   0.6  1
  6489      2:dis      2:dis       0.7  1
  6490      2:dis      2:dis       0.6  1
  6491      2:dis      1:ord   +   0.6  1
  6492      2:dis      1:ord   +   0.7  1
  6493      2:dis      2:dis       0.8  2
  6494      2:dis      2:dis       0.8  2
  6495      2:dis      2:dis       0.7  2
  6496      2:dis      2:dis       0.8  2
  6497      2:dis      2:dis       0.9  2
  6498      2:dis      2:dis       0.7  2
  6499      2:dis      2:dis       1  2
  6500      2:dis      2:dis       0.9  2
  6501      2:dis      2:dis       0.7  2
  6502      2:dis      2:dis       0.6  2
  6503      2:dis      2:dis       0.6  2
  6504      2:dis      1:ord   +   0.5  2
  6505      2:dis      2:dis       0.8  2
  6506      2:dis      1:ord   +   0.5  1
  6507      2:dis      1:ord   +   0.6  1
  6508      2:dis      1:ord   +   0.5  1
  6509      2:dis      1:ord   +   0.5  1
  6510      2:dis      1:ord   +   0.6  1
  6511      2:dis      1:ord   +   0.6  1
  6512      2:dis      1:ord   +   0.6  1
  6513      2:dis      1:ord   +   0.6  1
  6514      2:dis      1:ord   +   0.8  1
  6515      2:dis      1:ord   +   0.7  1
  6516      2:dis      1:ord   +   0.6  1
  6517      2:dis      1:ord   +   0.5  1
  6518      2:dis      2:dis       0.7  1
  6519      2:dis      1:ord   +   0.7  1
  6520      2:dis      1:ord   +   0.6  1
  6521      2:dis      1:ord   +   0.7  1
  6522      2:dis      1:ord   +   0.5  1
  6523      2:dis      2:dis       0.6  1
  6524      2:dis      2:dis       0.6  1
  6525      2:dis      1:ord   +   0.7  1
  6526      2:dis      1:ord   +   0.6  1
  6527      2:dis      2:dis       0.6  1
  6528      2:dis      1:ord   +   0.5  1
  6529      2:dis      2:dis       0.7  1
  6530      2:dis      1:ord   +   0.5  1
  6531      2:dis      2:dis       0.6  1
  6532      2:dis      1:ord   +   0.6  1
  6533      2:dis      2:dis       0.7  1
  6534      2:dis      2:dis       0.8  1
  6535      2:dis      1:ord   +   0.6  1
  6536      2:dis      2:dis       0.7  2
  6537      2:dis      2:dis       0.9  2
  6538      2:dis      2:dis       0.7  2
  6539      2:dis      2:dis       0.7  2
  6540      2:dis      2:dis       0.6  2
  6541      2:dis      2:dis       0.6  2
  6542      2:dis      2:dis       0.7  2
  6543      2:dis      1:ord   +   0.6  2
  6544      2:dis      1:ord   +   0.5  2
  6545      2:dis      1:ord   +   0.6  2
  6546      2:dis      2:dis       0.7  2
  6547      2:dis      2:dis       0.6  2
  6548      2:dis      2:dis       0.7  2
  6549      2:dis      2:dis       0.6  2
  6550      2:dis      2:dis       0.6  2
  6551      2:dis      2:dis       0.7  2
  6552      2:dis      2:dis       0.9  2
  6553      2:dis      2:dis       0.7  2
  6554      2:dis      1:ord   +   0.5  2
  6555      2:dis      2:dis       0.7  2
  6556      2:dis      2:dis       0.8  2
  6557      2:dis      1:ord   +   0.7  2
  6558      2:dis      2:dis       0.6  2
  6559      2:dis      2:dis       0.7  2
  6560      2:dis      2:dis       0.6  2
  6561      2:dis      2:dis       0.6  2
  6562      2:dis      2:dis       0.8  2
  6563      2:dis      2:dis       0.6  2
  6564      2:dis      2:dis       0.6  2
  6565      2:dis      1:ord   +   0.5  2
  6566      2:dis      2:dis       0.6  2
  6567      2:dis      2:dis       0.6  2
  6568      2:dis      1:ord   +   0.5  2
  6569      2:dis      1:ord   +   0.5  2
  6570      2:dis      2:dis       0.9  2
  6571      2:dis      2:dis       0.6  2
  6572      2:dis      1:ord   +   0.5  2
  6573      2:dis      2:dis       0.8  2
  6574      2:dis      2:dis       0.8  2
  6575      2:dis      2:dis       0.9  2
  6576      2:dis      2:dis       0.8  2
  6577      2:dis      2:dis       0.8  2
  6578      2:dis      2:dis       0.667  2
  6579      2:dis      2:dis       1  2
  6580      2:dis      2:dis       0.8  2
  6581      2:dis      2:dis       0.9  2
  6582      2:dis      2:dis       0.9  2
  6583      2:dis      1:ord   +   0.5  2
  6584      2:dis      2:dis       0.8  2
  6585      2:dis      2:dis       0.7  2
  6586      2:dis      2:dis       0.8  2
  6587      2:dis      2:dis       0.9  2
  6588      2:dis      1:ord   +   0.6  2
  6589      2:dis      2:dis       0.9  2
  6590      2:dis      2:dis       0.9  2
  6591      2:dis      1:ord   +   0.5  2
  6592      2:dis      2:dis       0.7  2
  6593      2:dis      1:ord   +   0.6  2
  6594      2:dis      1:ord   +   0.5  2
  6595      2:dis      2:dis       0.6  2
  6596      2:dis      2:dis       0.8  2
  6597      2:dis      2:dis       0.6  2
  6598      2:dis      1:ord   +   0.6  1
  6599      2:dis      1:ord   +   0.5  1
  6600      2:dis      1:ord   +   0.6  1
  6601      2:dis      1:ord   +   0.6  1
  6602      2:dis      1:ord   +   0.7  1
  6603      2:dis      1:ord   +   0.5  1
  6604      2:dis      1:ord   +   0.5  1
  6605      2:dis      2:dis       0.6  1
  6606      2:dis      1:ord   +   0.5  1
  6607      2:dis      1:ord   +   0.6  1
  6608      2:dis      1:ord   +   0.9  1
  6609      2:dis      1:ord   +   0.6  1
  6610      2:dis      1:ord   +   0.6  1
  6611      2:dis      2:dis       0.6  1
  6612      2:dis      2:dis       0.7  1
  6613      2:dis      2:dis       0.9  1
  6614      2:dis      1:ord   +   0.6  1
  6615      1:ord      2:dis   +   0.8  2
  6616      1:ord      2:dis   +   0.9  2
  6617      1:ord      2:dis   +   0.8  2
  6618      1:ord      2:dis   +   0.6  2
  6619      1:ord      2:dis   +   0.6  2
  6620      1:ord      1:ord       0.5  2
  6621      1:ord      2:dis   +   0.8  2
  6622      1:ord      2:dis   +   0.6  2
  6623      1:ord      2:dis   +   0.6  2
  6624      1:ord      1:ord       0.6  2
  6625      1:ord      1:ord       0.5  2
  6626      1:ord      2:dis   +   0.7  2
  6627      1:ord      2:dis   +   0.7  2
  6628      1:ord      1:ord       0.5  2
  6629      1:ord      1:ord       0.5  2
  6630      1:ord      2:dis   +   0.9  2
  6631      1:ord      2:dis   +   0.8  2
  6632      1:ord      2:dis   +   0.6  2
  6633      1:ord      2:dis   +   0.7  2
  6634      1:ord      2:dis   +   0.7  2
  6635      1:ord      2:dis   +   0.6  2
  6636      1:ord      2:dis   +   0.8  2
  6637      1:ord      2:dis   +   0.6  2
  6638      1:ord      1:ord       0.6  2
  6639      1:ord      2:dis   +   0.7  2
  6640      1:ord      2:dis   +   0.6  2
  6641      1:ord      1:ord       0.6  2
  6642      1:ord      2:dis   +   0.7  2
  6643      1:ord      1:ord       0.5  2
  6644      1:ord      2:dis   +   0.6  2
  6645      1:ord      2:dis   +   0.7  2
  6646      1:ord      2:dis   +   0.7  2
  6647      1:ord      2:dis   +   0.7  2
  6648      1:ord      1:ord       0.5  2
  6649      1:ord      2:dis   +   0.6  2
  6650      1:ord      2:dis   +   0.9  2
  6651      1:ord      1:ord       0.6  2
  6652      1:ord      2:dis   +   0.8  2
  6653      1:ord      2:dis   +   0.9  2
  6654      1:ord      2:dis   +   0.7  2
  6655      1:ord      2:dis   +   0.7  2
  6656      1:ord      2:dis   +   0.6  2
  6657      1:ord      2:dis   +   0.7  2
  6658      1:ord      2:dis   +   0.8  2
  6659      1:ord      2:dis   +   0.7  2
  6660      1:ord      1:ord       0.5  2
  6661      1:ord      1:ord       0.5  2
  6662      1:ord      2:dis   +   0.9  2
  6663      1:ord      2:dis   +   0.9  2
  6664      1:ord      2:dis   +   0.7  2
  6665      1:ord      2:dis   +   0.6  2
  6666      1:ord      1:ord       0.55  2
  6667      1:ord      2:dis   +   0.7  2
  6668      1:ord      2:dis   +   0.7  2
  6669      1:ord      2:dis   +   0.7  2
  6670      1:ord      2:dis   +   1  2
  6671      1:ord      2:dis   +   0.8  2
  6672      1:ord      2:dis   +   0.9  2
  6673      1:ord      2:dis   +   0.6  2
  6674      1:ord      2:dis   +   0.8  2
  6675      1:ord      1:ord       0.5  2
  6676      1:ord      2:dis   +   0.7  2
  6677      1:ord      2:dis   +   0.9  2
  6678      1:ord      2:dis   +   0.7  2
  6679      1:ord      2:dis   +   0.8  2
  6680      1:ord      1:ord       0.5  2
  6681      1:ord      2:dis   +   0.6  2
  6682      1:ord      2:dis   +   0.6  2
  6683      1:ord      2:dis   +   0.6  2
  6684      1:ord      2:dis   +   0.9  2
  6685      1:ord      2:dis   +   0.7  2
  6686      1:ord      1:ord       0.6  2
  6687      1:ord      2:dis   +   0.6  2
  6688      1:ord      2:dis   +   0.6  2
  6689      1:ord      2:dis   +   0.7  2
  6690      1:ord      2:dis   +   0.8  2
  6691      1:ord      2:dis   +   0.9  2
  6692      1:ord      2:dis   +   0.7  2
  6693      1:ord      2:dis   +   0.6  2
  6694      1:ord      1:ord       0.5  2
  6695      1:ord      1:ord       0.6  2
  6696      1:ord      2:dis   +   0.7  2
  6697      1:ord      2:dis   +   0.7  2
  6698      1:ord      2:dis   +   0.7  2
  6699      1:ord      2:dis   +   0.6  2
  6700      1:ord      2:dis   +   0.7  2
  6701      1:ord      2:dis   +   0.7  2
  6702      1:ord      2:dis   +   0.8  2
  6703      1:ord      2:dis   +   0.7  2
  6704      1:ord      2:dis   +   0.9  2
  6705      1:ord      2:dis   +   0.8  2
  6706      1:ord      2:dis   +   1  2
  6707      1:ord      2:dis   +   0.6  2
  6708      1:ord      2:dis   +   0.9  2
  6709      1:ord      2:dis   +   0.9  2
  6710      1:ord      2:dis   +   0.7  2
  6711      1:ord      2:dis   +   0.8  2
  6712      1:ord      2:dis   +   0.8  2
  6713      1:ord      2:dis   +   0.8  2
  6714      1:ord      2:dis   +   0.9  2
  6715      1:ord      2:dis   +   0.9  2
  6716      1:ord      2:dis   +   1  2
  6717      1:ord      2:dis   +   1  2
  6718      1:ord      2:dis   +   0.9  2
  6719      1:ord      2:dis   +   0.9  2
  6720      1:ord      2:dis   +   0.9  2
  6721      1:ord      2:dis   +   0.8  2
  6722      1:ord      2:dis   +   0.65  2
  6723      1:ord      2:dis   +   0.7  2
  6724      1:ord      1:ord       0.65  2
  6725      1:ord      2:dis   +   1  2
  6726      1:ord      2:dis   +   0.8  2
  6727      1:ord      2:dis   +   0.7  2
  6728      1:ord      2:dis   +   0.9  2
  6729      1:ord      2:dis   +   0.9  2
  6730      1:ord      2:dis   +   0.7  2
  6731      1:ord      2:dis   +   0.6  2
  6732      1:ord      2:dis   +   0.9  2
  6733      1:ord      2:dis   +   0.9  2
  6734      1:ord      2:dis   +   0.7  2
  6735      1:ord      2:dis   +   0.8  2
  6736      1:ord      2:dis   +   0.6  2
  6737      1:ord      2:dis   +   0.7  2
  6738      1:ord      1:ord       0.7  2
  6739      1:ord      2:dis   +   0.9  2
  6740      1:ord      2:dis   +   0.7  2
  6741      1:ord      2:dis   +   0.6  2
  6742      1:ord      2:dis   +   0.7  2
  6743      1:ord      2:dis   +   0.7  2
  6744      1:ord      2:dis   +   0.7  2
  6745      1:ord      2:dis   +   0.8  2
  6746      1:ord      2:dis   +   0.8  2
  6747      1:ord      2:dis   +   0.9  2
  6748      1:ord      2:dis   +   0.7  2
  6749      1:ord      2:dis   +   0.8  2
  6750      1:ord      2:dis   +   0.9  2
  6751      1:ord      2:dis   +   0.7  2
  6752      1:ord      2:dis   +   0.8  2
  6753      1:ord      2:dis   +   0.9  2
  6754      1:ord      2:dis   +   0.7  2
  6755      1:ord      2:dis   +   0.9  2
  6756      1:ord      2:dis   +   0.9  2
  6757      1:ord      2:dis   +   0.9  2
  6758      1:ord      1:ord       0.5  2
  6759      1:ord      2:dis   +   0.7  2
  6760      1:ord      2:dis   +   0.7  2
  6761      1:ord      2:dis   +   1  2
  6762      1:ord      2:dis   +   0.9  2
  6763      1:ord      2:dis   +   0.9  2
  6764      1:ord      2:dis   +   0.9  2
  6765      1:ord      2:dis   +   1  2
  6766      1:ord      2:dis   +   0.9  2
  6767      1:ord      2:dis   +   1  2
  6768      1:ord      2:dis   +   0.8  2
  6769      1:ord      2:dis   +   0.9  2
  6770      1:ord      2:dis   +   0.8  2
  6771      1:ord      2:dis   +   1  2
  6772      1:ord      2:dis   +   1  2
  6773      1:ord      2:dis   +   0.8  2
  6774      1:ord      2:dis   +   0.9  2
  6775      1:ord      2:dis   +   1  2
  6776      1:ord      2:dis   +   0.9  2
  6777      1:ord      2:dis   +   0.7  2
  6778      1:ord      2:dis   +   1  2
  6779      1:ord      2:dis   +   0.7  2
  6780      1:ord      2:dis   +   0.7  2
  6781      1:ord      2:dis   +   1  2
  6782      1:ord      2:dis   +   0.9  2
  6783      1:ord      2:dis   +   1  2
  6784      1:ord      2:dis   +   1  2
  6785      1:ord      2:dis   +   0.8  2
  6786      1:ord      2:dis   +   0.9  2
  6787      1:ord      2:dis   +   0.9  2
  6788      1:ord      2:dis   +   0.8  2
  6789      1:ord      2:dis   +   1  2
  6790      1:ord      2:dis   +   0.9  2
  6791      1:ord      2:dis   +   0.9  2
  6792      1:ord      2:dis   +   1  2
  6793      1:ord      2:dis   +   0.8  2
  6794      1:ord      2:dis   +   1  2
  6795      1:ord      2:dis   +   0.9  2
  6796      1:ord      2:dis   +   0.8  2
  6797      1:ord      2:dis   +   1  2
  6798      1:ord      2:dis   +   1  2
  6799      1:ord      2:dis   +   0.9  2
  6800      1:ord      2:dis   +   0.9  2
  6801      1:ord      2:dis   +   0.8  2
  6802      1:ord      2:dis   +   0.8  2
  6803      1:ord      2:dis   +   0.8  2
  6804      1:ord      2:dis   +   1  2
  6805      1:ord      2:dis   +   0.6  2
  6806      1:ord      1:ord       0.5  2
  6807      1:ord      2:dis   +   0.8  2
  6808      1:ord      2:dis   +   0.6  2
  6809      1:ord      2:dis   +   0.7  2
  6810      2:dis      1:ord   +   0.6  2
  6811      2:dis      1:ord   +   0.5  2
  6812      2:dis      2:dis       0.6  2
  6813      2:dis      1:ord   +   0.6  2
  6814      2:dis      2:dis       0.9  2
  6815      2:dis      2:dis       0.8  2
  6816      2:dis      2:dis       0.7  2
  6817      2:dis      2:dis       0.6  2
  6818      2:dis      2:dis       0.8  2
  6819      2:dis      2:dis       0.7  2
  6820      2:dis      2:dis       0.8  2
  6821      2:dis      2:dis       0.6  2
  6822      2:dis      2:dis       0.7  2
  6823      2:dis      2:dis       0.7  2
  6824      2:dis      1:ord   +   0.5  2
  6825      2:dis      2:dis       0.6  2
  6826      2:dis      2:dis       0.7  2
  6827      2:dis      2:dis       0.6  2
  6828      2:dis      2:dis       0.7  2
  6829      1:ord      2:dis   +   0.7  2
  6830      1:ord      2:dis   +   0.7  2
  6831      1:ord      2:dis   +   0.8  2
  6832      1:ord      1:ord       0.5  2
  6833      1:ord      2:dis   +   0.9  2
  6834      1:ord      2:dis   +   0.8  2
  6835      1:ord      1:ord       0.7  2
  6836      1:ord      2:dis   +   0.7  2
  6837      1:ord      1:ord       0.5  2
  6838      1:ord      2:dis   +   0.6  2
  6839      1:ord      1:ord       0.7  2
  6840      1:ord      2:dis   +   0.6  2
  6841      1:ord      1:ord       0.7  2
  6842      1:ord      1:ord       0.5  2
  6843      1:ord      1:ord       0.5  2
  6844      1:ord      2:dis   +   0.7  2
  6845      1:ord      1:ord       0.7  2
  6846      1:ord      2:dis   +   0.7  2
  6847      1:ord      1:ord       0.8  1
  6848      1:ord      1:ord       0.7  1
  6849      1:ord      1:ord       0.8  1
  6850      1:ord      1:ord       0.6  1
  6851      1:ord      1:ord       0.7  1
  6852      1:ord      1:ord       0.8  1
  6853      1:ord      1:ord       0.8  1
  6854      1:ord      1:ord       0.8  1
  6855      1:ord      1:ord       0.9  1
  6856      1:ord      1:ord       0.8  1
  6857      1:ord      1:ord       0.9  1
  6858      1:ord      1:ord       0.5  1
  6859      1:ord      1:ord       0.7  1
  6860      1:ord      1:ord       0.8  1
  6861      1:ord      1:ord       0.7  1
  6862      1:ord      1:ord       0.8  1
  6863      1:ord      1:ord       0.8  1
  6864      1:ord      1:ord       0.9  1
  6865      1:ord      1:ord       0.8  1
  6866      1:ord      1:ord       0.8  1
  6867      1:ord      1:ord       1  1
  6868      1:ord      1:ord       1  1
  6869      1:ord      1:ord       0.5  1
  6870      1:ord      1:ord       0.7  1
  6871      1:ord      1:ord       0.7  1
  6872      1:ord      1:ord       0.8  1
  6873      1:ord      1:ord       0.8  1
  6874      1:ord      1:ord       0.9  1
  6875      1:ord      1:ord       0.8  1
  6876      1:ord      1:ord       0.5  1
  6877      1:ord      1:ord       0.7  1
  6878      1:ord      1:ord       0.9  1
  6879      1:ord      1:ord       0.7  1
  6880      1:ord      1:ord       0.7  1
  6881      1:ord      1:ord       0.7  1
  6882      1:ord      1:ord       0.8  1
  6883      1:ord      1:ord       0.6  1
  6884      1:ord      1:ord       0.6  1
  6885      1:ord      1:ord       0.65  1
  6886      1:ord      1:ord       0.7  1
  6887      1:ord      1:ord       0.7  1
  6888      1:ord      1:ord       0.6  1
  6889      1:ord      2:dis   +   0.6  1
  6890      1:ord      2:dis   +   0.7  1
  6891      1:ord      1:ord       0.7  1
  6892      1:ord      1:ord       0.6  1
  6893      1:ord      1:ord       0.9  1
  6894      2:dis      1:ord   +   0.5  1
  6895      2:dis      1:ord   +   0.5  1
  6896      2:dis      2:dis       0.8  1
  6897      2:dis      1:ord   +   0.8  1
  6898      2:dis      1:ord   +   0.9  1
  6899      2:dis      1:ord   +   0.5  1
  6900      2:dis      1:ord   +   0.7  1
  6901      2:dis      1:ord   +   0.9  1
  6902      2:dis      1:ord   +   0.5  1
  6903      2:dis      2:dis       0.7  1
  6904      2:dis      1:ord   +   0.6  1
  6905      2:dis      1:ord   +   0.8  1
  6906      2:dis      1:ord   +   0.8  1
  6907      2:dis      1:ord   +   0.6  1
  6908      2:dis      1:ord   +   0.7  1
  6909      2:dis      1:ord   +   0.7  1
  6910      2:dis      1:ord   +   0.6  1
  6911      2:dis      1:ord   +   0.5  1
  6912      2:dis      1:ord   +   0.7  1
  6913      2:dis      1:ord   +   0.5  1
  6914      2:dis      2:dis       0.6  1
  6915      2:dis      1:ord   +   0.8  1
  6916      2:dis      1:ord   +   0.7  1
  6917      2:dis      1:ord   +   0.6  1
  6918      2:dis      1:ord   +   0.6  1
  6919      2:dis      1:ord   +   0.7  1
  6920      2:dis      1:ord   +   0.7  1
  6921      2:dis      1:ord   +   0.7  1
  6922      1:ord      1:ord       0.8  1
  6923      1:ord      1:ord       0.5  1
  6924      1:ord      1:ord       0.8  1
  6925      1:ord      1:ord       0.8  1
  6926      1:ord      1:ord       0.7  1
  6927      1:ord      1:ord       0.8  1
  6928      1:ord      1:ord       0.8  1
  6929      1:ord      1:ord       0.7  1
  6930      1:ord      1:ord       0.6  1
  6931      1:ord      1:ord       0.8  1
  6932      1:ord      1:ord       1  1
  6933      1:ord      1:ord       0.7  1
  6934      1:ord      1:ord       0.8  1
  6935      1:ord      1:ord       0.9  1
  6936      1:ord      1:ord       0.9  1
  6937      1:ord      1:ord       0.7  1
  6938      1:ord      1:ord       0.9  1
  6939      2:dis      1:ord   +   0.9  1
  6940      2:dis      1:ord   +   0.7  1
  6941      2:dis      1:ord   +   0.8  1
  6942      2:dis      1:ord   +   0.6  1
  6943      2:dis      1:ord   +   0.8  1
  6944      2:dis      1:ord   +   0.9  1
  6945      2:dis      1:ord   +   0.5  1
  6946      2:dis      1:ord   +   0.6  1
  6947      2:dis      1:ord   +   0.6  1
  6948      2:dis      1:ord   +   0.9  1
  6949      2:dis      1:ord   +   0.7  1
  6950      1:ord      1:ord       1  1
  6951      1:ord      1:ord       0.7  1
  6952      1:ord      2:dis   +   0.6  1
  6953      1:ord      1:ord       0.9  1
  6954      1:ord      1:ord       0.6  1
  6955      1:ord      1:ord       0.7  1
  6956      1:ord      1:ord       1  1
  6957      1:ord      1:ord       0.8  1
  6958      1:ord      1:ord       0.9  1
  6959      1:ord      1:ord       0.9  1
  6960      1:ord      1:ord       0.5  1
  6961      1:ord      1:ord       0.9  1
  6962      1:ord      1:ord       1  1
  6963      1:ord      1:ord       0.7  1
  6964      1:ord      1:ord       0.9  1
  6965      1:ord      1:ord       0.9  1
  6966      1:ord      1:ord       0.6  1
  6967      1:ord      1:ord       0.6  1
  6968      1:ord      1:ord       0.9  1
  6969      1:ord      1:ord       0.7  1
  6970      1:ord      1:ord       0.6  1
  6971      1:ord      1:ord       0.6  1
  6972      1:ord      1:ord       0.8  1
  6973      1:ord      2:dis   +   0.6  1
  6974      1:ord      1:ord       0.9  1
  6975      1:ord      1:ord       0.8  1
  6976      1:ord      1:ord       0.7  1
  6977      1:ord      1:ord       0.6  1
  6978      1:ord      1:ord       0.5  1
  6979      1:ord      1:ord       0.5  1
  6980      1:ord      1:ord       0.8  1
  6981      1:ord      1:ord       0.7  1
  6982      1:ord      2:dis   +   0.7  1
  6983      1:ord      1:ord       0.9  1
  6984      1:ord      1:ord       0.5  1
  6985      1:ord      1:ord       0.9  1
  6986      1:ord      1:ord       0.5  1
  6987      1:ord      1:ord       0.5  1
  6988      1:ord      1:ord       0.9  1
  6989      1:ord      1:ord       0.8  1
  6990      1:ord      1:ord       0.9  1
  6991      1:ord      1:ord       0.8  1
  6992      1:ord      1:ord       0.8  1
  6993      1:ord      1:ord       0.7  1
  6994      1:ord      1:ord       0.7  1
  6995      1:ord      1:ord       0.6  1
  6996      1:ord      1:ord       1  1
  6997      1:ord      1:ord       0.8  1
  6998      1:ord      1:ord       0.8  1
  6999      1:ord      1:ord       0.7  1
  7000      1:ord      1:ord       0.7  1
  7001      1:ord      1:ord       0.9  1
  7002      1:ord      1:ord       0.8  1
  7003      1:ord      1:ord       0.7  1
  7004      1:ord      1:ord       1  1
  7005      1:ord      1:ord       0.8  1
  7006      1:ord      1:ord       0.8  1
  7007      1:ord      1:ord       0.7  1
  7008      1:ord      2:dis   +   0.7  1
  7009      1:ord      1:ord       0.5  1
  7010      1:ord      1:ord       0.8  1
  7011      1:ord      2:dis   +   0.8  1
  7012      1:ord      2:dis   +   0.6  1
  7013      1:ord      1:ord       0.7  1
  7014      1:ord      1:ord       0.6  1
  7015      1:ord      1:ord       0.8  1
  7016      1:ord      1:ord       0.7  1
  7017      1:ord      2:dis   +   0.6  1
  7018      1:ord      1:ord       0.9  1
  7019      1:ord      1:ord       0.9  1
  7020      1:ord      1:ord       0.5  1
  7021      1:ord      2:dis   +   0.6  1
  7022      1:ord      1:ord       0.5  1
  7023      1:ord      2:dis   +   0.8  1
  7024      1:ord      1:ord       0.7  1
  7025      1:ord      1:ord       0.6  1
  7026      1:ord      1:ord       0.6  1
  7027      1:ord      2:dis   +   0.8  1
  7028      1:ord      1:ord       0.7  1
  7029      1:ord      2:dis   +   0.6  1
  7030      1:ord      1:ord       0.7  1
  7031      1:ord      1:ord       0.7  1
  7032      1:ord      1:ord       0.7  1
  7033      1:ord      1:ord       0.6  1
  7034      1:ord      1:ord       0.8  1
  7035      1:ord      1:ord       0.9  1
  7036      1:ord      1:ord       0.7  1
  7037      1:ord      1:ord       0.7  1
  7038      1:ord      1:ord       0.9  1
  7039      1:ord      1:ord       0.5  1
  7040      1:ord      1:ord       0.5  1
  7041      1:ord      1:ord       0.5  1
  7042      1:ord      1:ord       0.5  1
  7043      1:ord      2:dis   +   0.6  1
  7044      1:ord      1:ord       0.5  1
  7045      1:ord      1:ord       0.6  1
  7046      1:ord      2:dis   +   0.6  1
  7047      1:ord      1:ord       0.5  1
  7048      1:ord      1:ord       0.7  1
  7049      1:ord      2:dis   +   0.8  1
  7050      1:ord      1:ord       0.5  1
  7051      1:ord      2:dis   +   0.6  1
  7052      1:ord      1:ord       0.7  1
  7053      1:ord      1:ord       0.6  1
  7054      1:ord      2:dis   +   0.8  1
  7055      1:ord      2:dis   +   0.6  1
  7056      1:ord      1:ord       0.7  1
  7057      1:ord      2:dis   +   0.6  1
  7058      1:ord      1:ord       0.5  1
  7059      1:ord      1:ord       0.7  1
  7060      1:ord      1:ord       0.5  1
  7061      1:ord      2:dis   +   0.6  1
  7062      1:ord      1:ord       0.5  1
  7063      1:ord      1:ord       1  1
  7064      1:ord      1:ord       0.6  1
  7065      1:ord      1:ord       0.7  1
  7066      1:ord      2:dis   +   0.6  1
  7067      1:ord      1:ord       0.7  1
  7068      1:ord      1:ord       0.5  1
  7069      1:ord      1:ord       0.6  1
  7070      1:ord      1:ord       0.6  1
  7071      1:ord      1:ord       0.7  1
  7072      1:ord      1:ord       0.5  1
  7073      1:ord      1:ord       1  1
  7074      1:ord      1:ord       0.9  1
  7075      1:ord      1:ord       0.8  1
  7076      1:ord      1:ord       0.7  1
  7077      1:ord      1:ord       0.5  1
  7078      1:ord      1:ord       0.5  1
  7079      1:ord      2:dis   +   0.6  1
  7080      1:ord      1:ord       0.5  1
  7081      1:ord      1:ord       0.6  1
  7082      1:ord      1:ord       0.5  1
  7083      1:ord      2:dis   +   0.7  1
  7084      1:ord      1:ord       0.7  1
  7085      1:ord      1:ord       0.9  1
  7086      1:ord      1:ord       0.5  1
  7087      1:ord      2:dis   +   0.6  1
  7088      1:ord      1:ord       0.5  1
  7089      1:ord      1:ord       0.8  1
  7090      1:ord      2:dis   +   0.6  1
  7091      1:ord      1:ord       0.6  1
  7092      1:ord      1:ord       0.6  1
  7093      1:ord      2:dis   +   0.8  1
  7094      1:ord      1:ord       0.5  1
  7095      1:ord      1:ord       0.6  1
  7096      1:ord      1:ord       0.6  1
  7097      1:ord      1:ord       0.7  1
  7098      1:ord      1:ord       0.6  1
  7099      1:ord      1:ord       0.5  1
  7100      1:ord      1:ord       0.6  1
  7101      1:ord      1:ord       0.8  1
  7102      1:ord      1:ord       0.6  1
  7103      1:ord      1:ord       0.8  1
  7104      1:ord      1:ord       1  1
  7105      1:ord      1:ord       0.5  1
  7106      1:ord      1:ord       0.7  1
  7107      1:ord      2:dis   +   0.6  1
  7108      1:ord      1:ord       0.7  1
  7109      1:ord      1:ord       0.8  1
  7110      1:ord      1:ord       0.9  1
  7111      1:ord      1:ord       0.9  1
  7112      1:ord      1:ord       1  1
  7113      1:ord      1:ord       0.7  1
  7114      1:ord      1:ord       0.6  1
  7115      1:ord      1:ord       0.9  1
  7116      1:ord      1:ord       0.5  1
  7117      1:ord      1:ord       0.7  1
  7118      1:ord      1:ord       0.9  1
  7119      1:ord      2:dis   +   0.8  1
  7120      1:ord      1:ord       0.6  1
  7121      1:ord      2:dis   +   0.6  1
  7122      1:ord      1:ord       0.5  1
  7123      1:ord      1:ord       0.8  1
  7124      1:ord      1:ord       0.8  1
  7125      1:ord      1:ord       0.9  1
  7126      1:ord      2:dis   +   1  1
  7127      1:ord      1:ord       0.5  1
  7128      1:ord      1:ord       0.9  1
  7129      1:ord      1:ord       0.5  1
  7130      1:ord      1:ord       0.5  1
  7131      1:ord      1:ord       0.5  1
  7132      1:ord      1:ord       0.5  1
  7133      1:ord      1:ord       0.8  1
  7134      1:ord      2:dis   +   0.6  1
  7135      1:ord      2:dis   +   0.65  1
  7136      1:ord      1:ord       0.7  1
  7137      1:ord      1:ord       0.5  1
  7138      1:ord      1:ord       0.8  1
  7139      1:ord      1:ord       0.6  1
  7140      1:ord      2:dis   +   0.7  1
  7141      1:ord      1:ord       0.5  1
  7142      1:ord      2:dis   +   0.7  1
  7143      1:ord      2:dis   +   0.6  1
  7144      1:ord      1:ord       0.5  1
  7145      1:ord      2:dis   +   0.6  1
  7146      1:ord      1:ord       0.5  1
  7147      1:ord      1:ord       0.5  1
  7148      1:ord      1:ord       0.8  1
  7149      1:ord      1:ord       0.9  1
  7150      1:ord      2:dis   +   0.6  1
  7151      1:ord      1:ord       0.5  1
  7152      1:ord      1:ord       0.5  1
  7153      1:ord      1:ord       0.5  1
  7154      1:ord      1:ord       0.5  1
  7155      1:ord      1:ord       0.5  1
  7156      1:ord      1:ord       0.7  1
  7157      1:ord      1:ord       0.6  1
  7158      1:ord      1:ord       0.6  1
  7159      1:ord      1:ord       0.7  1
  7160      1:ord      1:ord       0.5  1
  7161      1:ord      2:dis   +   0.6  1
  7162      1:ord      2:dis   +   0.7  1
  7163      1:ord      2:dis   +   0.7  1
  7164      1:ord      1:ord       0.8  1
  7165      1:ord      2:dis   +   0.8  1
  7166      1:ord      1:ord       0.7  1
  7167      1:ord      2:dis   +   0.7  1
  7168      1:ord      1:ord       0.5  1
  7169      1:ord      1:ord       0.7  1
  7170      1:ord      1:ord       0.7  1
  7171      1:ord      1:ord       0.7  1
  7172      1:ord      1:ord       0.7  1
  7173      1:ord      2:dis   +   0.6  1
  7174      1:ord      1:ord       0.7  1
  7175      1:ord      1:ord       0.5  1
  7176      1:ord      1:ord       0.8  1
  7177      1:ord      1:ord       0.8  1
  7178      1:ord      1:ord       0.7  1
  7179      1:ord      1:ord       0.8  1
  7180      1:ord      1:ord       0.6  1
  7181      1:ord      1:ord       0.9  1
  7182      1:ord      1:ord       0.6  1
  7183      1:ord      1:ord       0.7  1
  7184      1:ord      1:ord       0.5  1
  7185      1:ord      1:ord       0.5  1
  7186      1:ord      1:ord       0.5  1
  7187      1:ord      1:ord       0.8  1
  7188      1:ord      1:ord       0.6  1
  7189      1:ord      1:ord       0.5  1
  7190      1:ord      1:ord       0.5  1
  7191      1:ord      1:ord       0.7  1
  7192      1:ord      1:ord       0.7  1
  7193      1:ord      1:ord       0.7  1
  7194      1:ord      1:ord       0.6  1
  7195      1:ord      1:ord       0.7  1
  7196      1:ord      1:ord       0.7  1
  7197      1:ord      1:ord       0.8  1
  7198      1:ord      1:ord       0.6  1
  7199      1:ord      1:ord       0.7  1
  7200      1:ord      1:ord       0.8  1
  7201      1:ord      1:ord       0.8  1
  7202      1:ord      1:ord       0.7  1
  7203      1:ord      1:ord       0.7  1
  7204      1:ord      1:ord       0.9  1
  7205      1:ord      1:ord       0.5  1
  7206      1:ord      1:ord       0.5  1
  7207      1:ord      2:dis   +   0.6  1
  7208      1:ord      1:ord       0.8  1
  7209      1:ord      1:ord       0.8  1
  7210      1:ord      1:ord       0.7  1
  7211      1:ord      1:ord       0.6  1
  7212      1:ord      1:ord       0.5  1
  7213      1:ord      1:ord       0.5  1
  7214      1:ord      1:ord       0.5  1
  7215      1:ord      1:ord       0.5  1
  7216      1:ord      1:ord       0.9  1
  7217      1:ord      2:dis   +   0.7  1
  7218      1:ord      1:ord       0.5  1
  7219      1:ord      2:dis   +   0.6  1
  7220      1:ord      2:dis   +   0.8  1
  7221      1:ord      2:dis   +   0.7  1
  7222      1:ord      2:dis   +   0.8  1
  7223      1:ord      1:ord       0.5  1
  7224      1:ord      2:dis   +   0.6  1
  7225      1:ord      2:dis   +   0.8  1
  7226      1:ord      2:dis   +   0.8  1
  7227      1:ord      1:ord       0.5  1
  7228      1:ord      2:dis   +   0.6  1
  7229      1:ord      1:ord       0.6  1
  7230      1:ord      2:dis   +   0.6  1
  7231      1:ord      1:ord       0.7  1
  7232      1:ord      2:dis   +   0.6  1
  7233      1:ord      1:ord       0.7  1
  7234      1:ord      1:ord       0.9  1
  7235      1:ord      1:ord       0.6  1
  7236      1:ord      1:ord       0.9  1
  7237      1:ord      1:ord       0.5  1
  7238      1:ord      1:ord       0.5  1
  7239      1:ord      1:ord       0.6  1
  7240      1:ord      1:ord       0.8  1
  7241      1:ord      1:ord       1  1
  7242      1:ord      1:ord       0.6  1
  7243      1:ord      1:ord       0.9  1
  7244      1:ord      1:ord       0.7  1
  7245      1:ord      1:ord       0.5  1
  7246      1:ord      2:dis   +   0.6  1
  7247      1:ord      1:ord       0.7  1
  7248      1:ord      1:ord       0.7  1
  7249      1:ord      1:ord       1  1
  7250      1:ord      1:ord       0.8  1
  7251      1:ord      1:ord       0.6  1
  7252      1:ord      1:ord       0.8  1
  7253      1:ord      1:ord       0.8  1
  7254      1:ord      1:ord       0.7  1
  7255      1:ord      1:ord       0.9  1
  7256      1:ord      1:ord       0.5  1
  7257      1:ord      1:ord       0.7  1
  7258      1:ord      1:ord       0.6  1
  7259      1:ord      1:ord       0.7  1
  7260      1:ord      1:ord       0.5  1
  7261      1:ord      1:ord       0.6  1
  7262      1:ord      1:ord       0.6  1
  7263      1:ord      1:ord       1  1
  7264      1:ord      1:ord       0.7  1
  7265      1:ord      1:ord       0.9  1
  7266      1:ord      1:ord       0.9  1
  7267      1:ord      1:ord       0.9  1
  7268      1:ord      1:ord       0.5  1
  7269      1:ord      1:ord       0.7  1
  7270      1:ord      1:ord       0.8  1
  7271      1:ord      1:ord       0.9  1
  7272      1:ord      1:ord       0.7  1
  7273      1:ord      1:ord       0.8  1
  7274      1:ord      1:ord       0.7  1
  7275      1:ord      1:ord       0.6  1
  7276      1:ord      1:ord       0.6  1
  7277      1:ord      1:ord       0.5  1
  7278      1:ord      1:ord       0.7  1
  7279      1:ord      2:dis   +   0.6  2
  7280      1:ord      1:ord       0.5  1
  7281      1:ord      1:ord       0.5  1
  7282      1:ord      1:ord       0.5  1
  7283      1:ord      1:ord       0.6  1
  7284      1:ord      1:ord       0.5  1
  7285      1:ord      1:ord       0.6  1
  7286      1:ord      1:ord       0.5  1
  7287      1:ord      1:ord       0.6  1
  7288      1:ord      1:ord       0.5  1
  7289      1:ord      2:dis   +   0.7  1
  7290      1:ord      2:dis   +   0.7  1
  7291      1:ord      2:dis   +   0.7  1
  7292      1:ord      1:ord       0.6  1
  7293      1:ord      1:ord       0.7  1
  7294      1:ord      2:dis   +   0.7  1
  7295      1:ord      1:ord       0.5  1
  7296      1:ord      1:ord       0.7  1
  7297      1:ord      1:ord       0.8  1
  7298      1:ord      1:ord       0.7  1
  7299      1:ord      1:ord       0.7  1
  7300      1:ord      1:ord       0.5  1
  7301      1:ord      1:ord       0.6  1
  7302      1:ord      2:dis   +   0.6  1
  7303      1:ord      2:dis   +   0.6  1
  7304      1:ord      1:ord       0.5  1
  7305      1:ord      2:dis   +   0.6  2
  7306      1:ord      2:dis   +   0.7  2
  7307      1:ord      2:dis   +   0.7  2
  7308      1:ord      2:dis   +   0.7  2
  7309      1:ord      2:dis   +   0.6  2
  7310      1:ord      2:dis   +   0.6  2
  7311      1:ord      1:ord       0.6  2
  7312      1:ord      2:dis   +   0.8  2
  7313      1:ord      2:dis   +   0.6  2
  7314      1:ord      2:dis   +   0.7  2
  7315      1:ord      1:ord       0.5  2
  7316      1:ord      2:dis   +   0.6  2
  7317      1:ord      2:dis   +   0.7  2
  7318      1:ord      2:dis   +   1  2
  7319      1:ord      2:dis   +   0.8  2
  7320      1:ord      2:dis   +   0.7  2
  7321      1:ord      2:dis   +   0.9  2
  7322      1:ord      2:dis   +   1  2
  7323      1:ord      2:dis   +   0.7  2
  7324      1:ord      2:dis   +   0.6  2
  7325      1:ord      2:dis   +   0.8  2
  7326      1:ord      2:dis   +   0.8  2
  7327      1:ord      2:dis   +   0.8  2
  7328      1:ord      2:dis   +   0.6  2
  7329      1:ord      2:dis   +   0.7  2
  7330      1:ord      2:dis   +   0.6  2
  7331      1:ord      2:dis   +   0.9  2
  7332      1:ord      1:ord       0.5  2
  7333      1:ord      2:dis   +   0.8  2
  7334      1:ord      1:ord       0.6  1
  7335      1:ord      1:ord       0.6  1
  7336      1:ord      1:ord       0.6  1
  7337      1:ord      1:ord       0.8  1
  7338      1:ord      1:ord       0.7  1
  7339      1:ord      1:ord       0.6  1
  7340      1:ord      1:ord       0.6  1
  7341      1:ord      1:ord       0.7  1
  7342      1:ord      1:ord       0.7  1
  7343      1:ord      1:ord       0.8  1
  7344      1:ord      1:ord       0.8  1
  7345      1:ord      1:ord       0.8  1
  7346      1:ord      1:ord       0.9  1
  7347      1:ord      1:ord       0.9  1
  7348      1:ord      1:ord       0.7  1
  7349      1:ord      1:ord       0.9  1
  7350      1:ord      1:ord       0.8  1
  7351      1:ord      1:ord       1  1
  7352      1:ord      1:ord       0.9  1
  7353      1:ord      1:ord       0.6  1
  7354      1:ord      1:ord       0.9  1
  7355      1:ord      1:ord       0.9  1
  7356      1:ord      1:ord       0.9  1
  7357      1:ord      1:ord       0.8  1
  7358      1:ord      1:ord       0.8  1
  7359      1:ord      1:ord       0.8  1
  7360      1:ord      1:ord       0.8  1
  7361      1:ord      1:ord       0.7  1
  7362      1:ord      1:ord       0.6  1
  7363      1:ord      1:ord       0.8  1
  7364      1:ord      1:ord       0.7  1
  7365      1:ord      1:ord       0.6  1
  7366      1:ord      1:ord       0.8  1
  7367      1:ord      1:ord       0.7  1
  7368      1:ord      1:ord       0.9  1
  7369      1:ord      1:ord       0.5  1
  7370      1:ord      1:ord       0.8  1
  7371      1:ord      2:dis   +   0.7  1
  7372      1:ord      1:ord       0.5  1
  7373      1:ord      2:dis   +   0.6  1
  7374      1:ord      2:dis   +   0.7  1
  7375      1:ord      1:ord       0.5  1
  7376      1:ord      1:ord       0.5  1
  7377      1:ord      2:dis   +   0.7  1
  7378      1:ord      1:ord       0.7  1
  7379      1:ord      2:dis   +   0.7  2
  7380      1:ord      2:dis   +   0.9  2
  7381      1:ord      2:dis   +   0.8  2
  7382      1:ord      2:dis   +   0.7  2
  7383      1:ord      2:dis   +   0.8  2
  7384      1:ord      2:dis   +   0.6  2
  7385      1:ord      1:ord       0.5  2
  7386      1:ord      2:dis   +   0.6  2
  7387      1:ord      1:ord       0.7  1
  7388      1:ord      1:ord       0.5  1
  7389      1:ord      1:ord       0.5  1
  7390      1:ord      1:ord       0.7  1
  7391      1:ord      1:ord       0.8  1
  7392      1:ord      1:ord       0.5  1
  7393      1:ord      1:ord       0.7  1
  7394      1:ord      2:dis   +   0.6  1
  7395      1:ord      1:ord       0.8  1
  7396      1:ord      1:ord       1  1
  7397      1:ord      1:ord       0.7  1
  7398      1:ord      1:ord       0.65  1
  7399      1:ord      1:ord       0.6  1
  7400      1:ord      1:ord       0.5  1
  7401      1:ord      1:ord       0.8  1
  7402      1:ord      1:ord       0.7  1
  7403      1:ord      1:ord       0.8  1
  7404      1:ord      1:ord       0.6  1
  7405      1:ord      2:dis   +   0.6  1
  7406      1:ord      1:ord       0.8  1
  7407      1:ord      1:ord       0.8  1
  7408      1:ord      1:ord       0.8  1
  7409      1:ord      1:ord       0.9  1
  7410      1:ord      1:ord       0.6  1
  7411      1:ord      1:ord       0.7  1
  7412      1:ord      1:ord       0.7  1
  7413      1:ord      1:ord       0.6  1
  7414      1:ord      1:ord       0.8  1
  7415      1:ord      1:ord       0.7  1
  7416      1:ord      1:ord       0.9  1
  7417      1:ord      1:ord       0.6  1
  7418      1:ord      1:ord       0.9  1
  7419      1:ord      2:dis   +   0.7  1
  7420      1:ord      1:ord       0.8  1
  7421      1:ord      1:ord       0.6  1
  7422      1:ord      1:ord       0.6  1
  7423      1:ord      1:ord       1  1
  7424      1:ord      1:ord       0.7  1
  7425      1:ord      1:ord       0.9  1
  7426      1:ord      1:ord       0.6  1
  7427      1:ord      1:ord       1  1
  7428      1:ord      1:ord       0.8  1
  7429      1:ord      1:ord       1  1
  7430      1:ord      1:ord       0.8  1
  7431      1:ord      1:ord       0.8  1
  7432      1:ord      1:ord       0.8  1
  7433      1:ord      1:ord       0.8  1
  7434      1:ord      1:ord       0.7  1
  7435      1:ord      1:ord       0.8  1
  7436      1:ord      1:ord       0.8  1
  7437      1:ord      2:dis   +   0.6  1
  7438      1:ord      1:ord       0.9  1
  7439      1:ord      1:ord       0.9  1
  7440      1:ord      1:ord       0.7  1
  7441      1:ord      1:ord       0.9  1
  7442      1:ord      1:ord       0.85  1
  7443      1:ord      1:ord       0.7  1
  7444      1:ord      1:ord       0.7  1
  7445      1:ord      1:ord       0.7  1
  7446      1:ord      1:ord       0.7  1
  7447      1:ord      1:ord       0.7  1
  7448      1:ord      1:ord       0.5  1
  7449      1:ord      1:ord       0.8  1
  7450      1:ord      1:ord       0.7  1
  7451      1:ord      1:ord       0.7  1
  7452      1:ord      1:ord       0.7  1
  7453      1:ord      1:ord       0.7  1
  7454      1:ord      1:ord       1  1
  7455      1:ord      1:ord       0.6  1
  7456      1:ord      1:ord       0.7  1
  7457      1:ord      1:ord       0.8  1
  7458      1:ord      1:ord       0.9  1
  7459      1:ord      1:ord       1  1
  7460      1:ord      1:ord       0.6  1
  7461      1:ord      1:ord       0.9  1
  7462      1:ord      1:ord       0.7  1
  7463      1:ord      1:ord       0.7  1
  7464      1:ord      1:ord       0.5  1
  7465      1:ord      1:ord       0.8  1
  7466      1:ord      1:ord       0.7  1
  7467      1:ord      1:ord       0.8  1
  7468      1:ord      1:ord       0.7  1
  7469      1:ord      1:ord       0.8  1
  7470      1:ord      1:ord       0.8  1
  7471      1:ord      1:ord       0.7  1
  7472      1:ord      1:ord       0.7  1
  7473      1:ord      1:ord       0.8  1
  7474      1:ord      1:ord       0.8  1
  7475      1:ord      1:ord       0.8  1
  7476      1:ord      1:ord       0.8  1
  7477      1:ord      1:ord       0.7  1
  7478      1:ord      1:ord       0.9  1
  7479      1:ord      1:ord       0.8  1
  7480      1:ord      1:ord       0.7  1
  7481      1:ord      1:ord       0.5  1
  7482      1:ord      1:ord       0.6  1
  7483      1:ord      1:ord       0.5  1
  7484      1:ord      1:ord       0.6  1
  7485      1:ord      1:ord       0.5  1
  7486      1:ord      2:dis   +   0.6  1
  7487      1:ord      1:ord       0.5  1
  7488      1:ord      2:dis   +   0.6  1
  7489      1:ord      2:dis   +   0.6  1
  7490      1:ord      2:dis   +   0.8  1
  7491      1:ord      1:ord       0.5  1
  7492      1:ord      1:ord       0.6  1
  7493      1:ord      2:dis   +   0.6  1
  7494      1:ord      2:dis   +   0.6  1
  7495      1:ord      2:dis   +   0.8  1
  7496      1:ord      1:ord       0.5  1
  7497      1:ord      1:ord       0.6  1
  7498      1:ord      1:ord       0.8  1
  7499      1:ord      1:ord       0.6  1
  7500      1:ord      1:ord       0.8  1
  7501      1:ord      1:ord       0.8  1
  7502      1:ord      1:ord       0.7  1
  7503      1:ord      1:ord       0.7  1
  7504      1:ord      1:ord       1  1
  7505      1:ord      1:ord       0.7  1
  7506      1:ord      1:ord       0.5  1
  7507      1:ord      1:ord       0.6  1
  7508      1:ord      1:ord       0.8  1
  7509      1:ord      1:ord       0.8  1
  7510      1:ord      1:ord       0.9  1
  7511      1:ord      1:ord       0.7  1
  7512      1:ord      1:ord       0.7  1
  7513      1:ord      1:ord       0.6  1
  7514      1:ord      1:ord       1  1
  7515      1:ord      1:ord       0.6  1
  7516      1:ord      1:ord       0.7  1
  7517      1:ord      1:ord       0.7  1
  7518      1:ord      1:ord       0.9  1
  7519      1:ord      1:ord       0.6  1
  7520      1:ord      1:ord       0.7  1
  7521      1:ord      1:ord       0.6  1
  7522      1:ord      1:ord       0.8  1
  7523      1:ord      1:ord       0.8  1
  7524      1:ord      1:ord       0.8  1
  7525      1:ord      1:ord       0.7  1
  7526      1:ord      1:ord       0.8  1
  7527      1:ord      1:ord       0.8  1
  7528      1:ord      1:ord       0.8  1
  7529      1:ord      1:ord       0.8  1
  7530      1:ord      1:ord       0.6  1
  7531      1:ord      1:ord       0.8  1
  7532      1:ord      2:dis   +   0.6  1
  7533      1:ord      1:ord       0.8  1
  7534      1:ord      1:ord       0.7  1
  7535      1:ord      1:ord       0.7  1
  7536      1:ord      1:ord       0.6  1
  7537      1:ord      1:ord       0.8  1
  7538      1:ord      1:ord       0.7  1
  7539      1:ord      1:ord       0.8  1
  7540      1:ord      1:ord       0.7  1
  7541      1:ord      1:ord       0.9  1
  7542      1:ord      1:ord       0.7  1
  7543      1:ord      1:ord       0.7  1
  7544      1:ord      1:ord       0.9  1
  7545      1:ord      1:ord       0.8  1
  7546      1:ord      1:ord       0.8  1
  7547      1:ord      1:ord       0.7  1
  7548      1:ord      2:dis   +   0.6  1
  7549      1:ord      1:ord       0.7  1
  7550      1:ord      1:ord       0.9  1
  7551      1:ord      1:ord       0.9  1
  7552      1:ord      1:ord       0.8  1
  7553      1:ord      1:ord       0.6  1
  7554      1:ord      1:ord       0.7  1
  7555      1:ord      1:ord       1  1
  7556      1:ord      1:ord       1  1
  7557      1:ord      1:ord       0.5  1
  7558      1:ord      1:ord       0.7  1
  7559      1:ord      1:ord       0.8  1
  7560      1:ord      1:ord       0.6  1
  7561      1:ord      1:ord       1  1
  7562      1:ord      1:ord       0.7  1
  7563      1:ord      1:ord       0.7  1
  7564      1:ord      1:ord       0.9  1
  7565      1:ord      1:ord       0.8  1
  7566      1:ord      1:ord       0.9  1
  7567      1:ord      1:ord       0.8  1
  7568      1:ord      1:ord       0.8  1
  7569      1:ord      1:ord       1  1
  7570      1:ord      1:ord       0.8  1
  7571      1:ord      1:ord       0.7  1
  7572      1:ord      1:ord       0.6  1
  7573      1:ord      1:ord       0.5  1
  7574      1:ord      1:ord       0.9  1
  7575      1:ord      1:ord       0.6  1
  7576      1:ord      1:ord       0.7  1
  7577      1:ord      1:ord       0.9  1
  7578      1:ord      1:ord       0.7  1
  7579      1:ord      1:ord       0.7  1
  7580      1:ord      1:ord       0.8  1
  7581      1:ord      1:ord       0.9  1
  7582      1:ord      1:ord       0.8  1
  7583      1:ord      1:ord       0.8  1
  7584      1:ord      1:ord       0.6  1
  7585      1:ord      1:ord       0.8  1
  7586      1:ord      1:ord       0.7  1
  7587      1:ord      1:ord       0.9  1
  7588      1:ord      1:ord       0.6  1
  7589      1:ord      1:ord       0.5  1
  7590      1:ord      1:ord       0.7  1
  7591      1:ord      1:ord       0.6  1
  7592      1:ord      1:ord       0.9  1
  7593      1:ord      1:ord       0.7  1
  7594      1:ord      1:ord       0.6  1
  7595      1:ord      1:ord       0.6  1
  7596      1:ord      1:ord       0.6  1
  7597      1:ord      1:ord       0.6  1
  7598      1:ord      1:ord       0.9  1
  7599      1:ord      1:ord       0.5  1
  7600      1:ord      1:ord       0.6  1
  7601      1:ord      2:dis   +   0.8  1
  7602      1:ord      2:dis   +   0.8  1
  7603      1:ord      2:dis   +   0.7  1
  7604      1:ord      2:dis   +   0.6  1
  7605      1:ord      1:ord       0.9  1
  7606      1:ord      2:dis   +   0.6  1
  7607      1:ord      2:dis   +   0.6  1
  7608      1:ord      1:ord       0.6  1
  7609      1:ord      1:ord       0.6  1
  7610      1:ord      1:ord       0.7  1
  7611      1:ord      1:ord       0.8  1
  7612      1:ord      1:ord       0.6  1
  7613      1:ord      1:ord       0.7  1
  7614      1:ord      1:ord       0.6  1
  7615      1:ord      1:ord       0.6  1
  7616      1:ord      1:ord       0.9  1
  7617      1:ord      1:ord       0.8  1
  7618      1:ord      1:ord       0.8  1
  7619      1:ord      1:ord       0.7  1
  7620      1:ord      1:ord       0.7  1
  7621      1:ord      1:ord       0.8  1
  7622      1:ord      1:ord       0.6  1
  7623      1:ord      1:ord       0.7  1
  7624      1:ord      1:ord       1  1
  7625      1:ord      1:ord       0.7  1
  7626      1:ord      1:ord       0.7  1
  7627      1:ord      1:ord       0.9  1
  7628      1:ord      2:dis   +   0.7  1
  7629      1:ord      1:ord       0.6  1
  7630      1:ord      1:ord       0.6  1
  7631      1:ord      1:ord       0.8  1
  7632      1:ord      1:ord       0.9  1
  7633      1:ord      2:dis   +   0.6  1
  7634      1:ord      1:ord       0.7  1
  7635      1:ord      1:ord       1  1
  7636      1:ord      1:ord       0.8  1
  7637      1:ord      1:ord       0.6  1
  7638      1:ord      1:ord       0.8  1
  7639      1:ord      1:ord       0.7  1
  7640      1:ord      1:ord       0.9  1
  7641      1:ord      1:ord       0.8  1
  7642      1:ord      1:ord       0.9  1
  7643      1:ord      1:ord       0.8  1
  7644      1:ord      1:ord       0.7  1
  7645      1:ord      1:ord       0.8  1
  7646      1:ord      1:ord       0.6  1
  7647      1:ord      1:ord       0.8  1
  7648      1:ord      1:ord       0.9  1
  7649      1:ord      1:ord       0.9  1
  7650      1:ord      1:ord       0.6  1
  7651      1:ord      1:ord       0.7  1
  7652      1:ord      1:ord       0.8  1
  7653      1:ord      1:ord       0.7  1
  7654      1:ord      1:ord       0.6  1
  7655      1:ord      1:ord       0.7  1
  7656      1:ord      1:ord       0.6  1
  7657      1:ord      1:ord       0.6  1
  7658      1:ord      1:ord       0.9  1
  7659      1:ord      1:ord       0.5  1
  7660      1:ord      1:ord       0.5  1
  7661      1:ord      2:dis   +   0.6  1
  7662      1:ord      2:dis   +   0.9  1
  7663      1:ord      2:dis   +   0.7  1
  7664      1:ord      2:dis   +   0.9  1
  7665      1:ord      1:ord       0.6  1
  7666      1:ord      2:dis   +   0.8  1
  7667      1:ord      1:ord       0.5  1
  7668      1:ord      1:ord       0.6  1
  7669      1:ord      1:ord       0.6  1
  7670      1:ord      1:ord       0.6  1
  7671      1:ord      1:ord       0.8  1
  7672      1:ord      1:ord       0.5  1
  7673      1:ord      1:ord       0.5  1
  7674      1:ord      1:ord       0.9  1
  7675      1:ord      1:ord       0.7  1
  7676      1:ord      1:ord       0.5  1
  7677      1:ord      1:ord       0.7  1
  7678      1:ord      1:ord       0.8  1
  7679      1:ord      1:ord       0.5  1
  7680      1:ord      1:ord       0.8  1
  7681      1:ord      1:ord       0.8  1
  7682      1:ord      1:ord       0.7  1
  7683      1:ord      1:ord       0.7  1
  7684      1:ord      1:ord       0.7  1
  7685      1:ord      1:ord       0.8  1
  7686      1:ord      1:ord       0.9  1
  7687      1:ord      1:ord       0.9  1
  7688      1:ord      1:ord       0.9  1
  7689      1:ord      1:ord       0.9  1
  7690      1:ord      1:ord       0.8  1
  7691      1:ord      1:ord       0.9  1
  7692      1:ord      1:ord       0.8  1
  7693      1:ord      1:ord       0.9  1
  7694      1:ord      1:ord       0.9  1
  7695      1:ord      1:ord       0.7  1
  7696      1:ord      1:ord       0.8  1
  7697      1:ord      1:ord       0.5  1
  7698      1:ord      1:ord       0.7  1
  7699      1:ord      1:ord       0.8  1
  7700      1:ord      1:ord       0.9  1
  7701      1:ord      1:ord       0.9  1
  7702      1:ord      1:ord       0.8  1
  7703      1:ord      1:ord       0.6  1
  7704      1:ord      1:ord       0.7  1
  7705      1:ord      1:ord       0.5  1
  7706      1:ord      1:ord       0.6  1
  7707      1:ord      1:ord       0.8  1
  7708      1:ord      1:ord       0.7  1
  7709      1:ord      2:dis   +   0.7  1
  7710      1:ord      1:ord       0.8  1
  7711      1:ord      1:ord       0.7  1
  7712      1:ord      1:ord       0.6  1
  7713      1:ord      1:ord       0.6  1
  7714      1:ord      1:ord       0.7  1
  7715      1:ord      1:ord       0.5  1
  7716      1:ord      1:ord       0.7  1
  7717      1:ord      1:ord       0.9  1
  7718      1:ord      1:ord       0.8  1
  7719      1:ord      1:ord       0.8  1
  7720      1:ord      1:ord       0.8  1
  7721      1:ord      1:ord       0.7  1
  7722      1:ord      1:ord       0.9  1
  7723      1:ord      1:ord       0.9  1
  7724      1:ord      1:ord       0.9  1
  7725      1:ord      1:ord       0.8  1
  7726      1:ord      1:ord       0.7  1
  7727      1:ord      1:ord       0.8  1
  7728      1:ord      1:ord       0.9  1
  7729      1:ord      1:ord       0.9  1
  7730      1:ord      1:ord       1  1
  7731      1:ord      1:ord       0.7  1
  7732      1:ord      1:ord       1  1
  7733      1:ord      1:ord       1  1
  7734      1:ord      1:ord       1  1
  7735      1:ord      1:ord       1  1
  7736      1:ord      1:ord       0.8  1
  7737      1:ord      1:ord       0.9  1
  7738      1:ord      1:ord       0.9  1
  7739      1:ord      1:ord       0.9  1
  7740      1:ord      1:ord       0.8  1
  7741      1:ord      1:ord       0.8  1
  7742      1:ord      1:ord       0.6  1
  7743      1:ord      1:ord       0.9  1
  7744      1:ord      2:dis   +   0.6  1
  7745      1:ord      1:ord       1  1
  7746      1:ord      1:ord       0.6  1
  7747      1:ord      1:ord       0.6  1
  7748      1:ord      1:ord       0.8  1
  7749      1:ord      2:dis   +   0.7  1
  7750      1:ord      1:ord       0.6  1
  7751      1:ord      1:ord       0.6  1
  7752      1:ord      1:ord       0.7  1
  7753      1:ord      1:ord       0.5  1
  7754      1:ord      2:dis   +   0.6  1
  7755      1:ord      1:ord       0.8  1
  7756      1:ord      1:ord       0.7  1
  7757      1:ord      1:ord       0.6  1
  7758      1:ord      2:dis   +   0.6  1
  7759      1:ord      1:ord       0.5  1
  7760      1:ord      2:dis   +   0.7  1
  7761      1:ord      1:ord       0.6  1
  7762      1:ord      2:dis   +   0.6  1
  7763      1:ord      1:ord       0.6  1
  7764      1:ord      2:dis   +   0.8  1
  7765      1:ord      2:dis   +   0.7  1
  7766      1:ord      2:dis   +   0.8  1
  7767      1:ord      2:dis   +   0.6  1
  7768      1:ord      1:ord       0.5  1
  7769      1:ord      1:ord       0.8  1
  7770      1:ord      1:ord       0.7  1
  7771      1:ord      2:dis   +   0.6  2
  7772      1:ord      1:ord       0.8  1
  7773      1:ord      1:ord       0.6  1
  7774      1:ord      1:ord       0.7  1
  7775      1:ord      1:ord       0.6  1
  7776      1:ord      1:ord       0.7  1
  7777      1:ord      1:ord       0.6  1
  7778      1:ord      1:ord       0.8  1
  7779      1:ord      1:ord       0.6  1
  7780      1:ord      1:ord       0.7  1
  7781      1:ord      1:ord       1  1
  7782      1:ord      1:ord       0.8  1
  7783      1:ord      1:ord       0.9  1
  7784      1:ord      1:ord       0.6  1
  7785      1:ord      2:dis   +   0.6  1
  7786      1:ord      2:dis   +   0.6  1
  7787      1:ord      1:ord       0.8  1
  7788      1:ord      1:ord       0.9  1
  7789      1:ord      1:ord       0.6  1
  7790      1:ord      1:ord       0.9  1
  7791      1:ord      1:ord       0.6  1
  7792      1:ord      1:ord       0.5  1
  7793      1:ord      1:ord       0.7  1
  7794      1:ord      1:ord       0.7  1
  7795      1:ord      1:ord       0.8  1
  7796      1:ord      1:ord       0.6  1
  7797      1:ord      1:ord       0.6  1
  7798      1:ord      1:ord       0.9  1
  7799      1:ord      1:ord       0.8  1
  7800      1:ord      1:ord       0.6  1
  7801      1:ord      2:dis   +   0.7  1
  7802      1:ord      1:ord       0.7  1
  7803      1:ord      1:ord       0.7  1
  7804      1:ord      1:ord       0.5  1
  7805      1:ord      1:ord       0.6  1
  7806      1:ord      1:ord       0.7  1
  7807      1:ord      1:ord       0.5  1
  7808      1:ord      1:ord       0.8  1
  7809      1:ord      1:ord       0.6  1
  7810      1:ord      1:ord       0.8  1
  7811      1:ord      1:ord       0.6  1
  7812      1:ord      1:ord       0.7  1
  7813      1:ord      1:ord       0.9  1
  7814      1:ord      1:ord       0.7  1
  7815      1:ord      1:ord       0.8  1
  7816      1:ord      1:ord       0.8  1
  7817      1:ord      1:ord       1  1
  7818      1:ord      1:ord       0.9  1
  7819      1:ord      1:ord       0.8  1
  7820      1:ord      1:ord       0.6  1
  7821      1:ord      1:ord       0.8  1
  7822      1:ord      1:ord       1  1
  7823      1:ord      1:ord       0.9  1
  7824      1:ord      1:ord       0.8  1
  7825      1:ord      1:ord       0.8  1
  7826      1:ord      1:ord       0.8  1
  7827      1:ord      1:ord       0.9  1
  7828      1:ord      1:ord       0.9  1
  7829      1:ord      1:ord       0.8  1
  7830      1:ord      1:ord       0.8  1
  7831      1:ord      1:ord       0.9  1
  7832      1:ord      1:ord       0.6  1
  7833      1:ord      1:ord       0.6  1
  7834      1:ord      1:ord       0.5  1
  7835      1:ord      1:ord       0.6  1
  7836      1:ord      1:ord       0.6  1
  7837      1:ord      1:ord       0.6  1
  7838      1:ord      1:ord       0.7  1
  7839      1:ord      1:ord       0.9  1
  7840      1:ord      1:ord       0.9  1
  7841      1:ord      1:ord       0.7  1
  7842      1:ord      1:ord       0.7  1
  7843      1:ord      1:ord       0.7  1
  7844      1:ord      1:ord       0.7  1
  7845      1:ord      1:ord       0.8  1
  7846      1:ord      1:ord       0.6  1
  7847      1:ord      1:ord       1  1
  7848      1:ord      1:ord       0.8  1
  7849      1:ord      1:ord       0.8  1
  7850      1:ord      1:ord       0.9  1
  7851      1:ord      1:ord       0.7  1
  7852      1:ord      1:ord       0.7  1
  7853      1:ord      1:ord       0.7  1
  7854      1:ord      1:ord       0.8  1
  7855      1:ord      1:ord       0.7  1
  7856      1:ord      1:ord       0.5  1
  7857      1:ord      1:ord       0.8  1
  7858      1:ord      1:ord       0.8  1
  7859      1:ord      1:ord       1  1
  7860      1:ord      1:ord       0.5  1
  7861      1:ord      2:dis   +   0.6  1
  7862      1:ord      1:ord       0.6  1
  7863      1:ord      1:ord       0.7  1
  7864      1:ord      1:ord       0.9  1
  7865      1:ord      1:ord       0.8  1
  7866      1:ord      1:ord       0.7  1
  7867      1:ord      1:ord       0.6  1
  7868      1:ord      1:ord       0.8  1
  7869      1:ord      1:ord       0.8  1
  7870      1:ord      1:ord       0.9  1
  7871      1:ord      1:ord       0.7  1
  7872      1:ord      1:ord       0.9  1
  7873      1:ord      1:ord       0.9  1
  7874      1:ord      1:ord       0.7  1
  7875      1:ord      1:ord       0.7  1
  7876      1:ord      1:ord       0.8  1
  7877      1:ord      1:ord       0.6  1
  7878      1:ord      1:ord       0.8  1
  7879      1:ord      1:ord       0.8  1
  7880      1:ord      1:ord       0.8  1
  7881      1:ord      2:dis   +   0.6  1
  7882      1:ord      1:ord       0.5  1
  7883      1:ord      1:ord       0.8  1
  7884      1:ord      1:ord       0.7  1
  7885      1:ord      1:ord       0.8  1
  7886      1:ord      1:ord       0.8  1
  7887      1:ord      1:ord       0.5  1
  7888      1:ord      1:ord       0.7  1
  7889      1:ord      1:ord       0.7  1
  7890      1:ord      1:ord       0.6  1
  7891      1:ord      1:ord       0.8  1
  7892      1:ord      1:ord       0.6  1
  7893      1:ord      1:ord       0.9  1
  7894      1:ord      1:ord       1  1
  7895      1:ord      1:ord       0.7  1
  7896      1:ord      1:ord       0.9  1
  7897      1:ord      1:ord       0.9  1
  7898      1:ord      1:ord       0.8  1
  7899      1:ord      1:ord       0.7  1
  7900      1:ord      1:ord       0.8  1
  7901      1:ord      1:ord       1  1
  7902      1:ord      1:ord       1  1
  7903      1:ord      1:ord       0.8  1
  7904      1:ord      1:ord       1  1
  7905      1:ord      1:ord       0.7  1
  7906      1:ord      1:ord       0.9  1
  7907      1:ord      1:ord       0.8  1
  7908      1:ord      1:ord       0.6  1
  7909      1:ord      1:ord       0.5  1
  7910      1:ord      1:ord       0.6  1
  7911      1:ord      1:ord       0.7  1
  7912      1:ord      1:ord       0.7  1
  7913      1:ord      1:ord       0.8  1
  7914      1:ord      1:ord       0.7  1
  7915      1:ord      1:ord       0.7  1
  7916      1:ord      1:ord       0.8  1
  7917      1:ord      1:ord       0.8  1
  7918      1:ord      2:dis   +   0.6  1
  7919      1:ord      1:ord       0.9  1
  7920      1:ord      1:ord       0.8  1
  7921      1:ord      1:ord       1  1
  7922      1:ord      1:ord       0.7  1
  7923      1:ord      1:ord       0.9  1
  7924      1:ord      1:ord       0.7  1
  7925      1:ord      1:ord       0.8  1
  7926      1:ord      1:ord       0.9  1
  7927      1:ord      1:ord       0.7  1
  7928      1:ord      1:ord       0.7  1
  7929      1:ord      1:ord       0.7  1
  7930      1:ord      1:ord       0.8  1
  7931      1:ord      1:ord       0.6  1
  7932      1:ord      1:ord       0.8  1
  7933      1:ord      1:ord       0.9  1
  7934      1:ord      2:dis   +   0.6  1
  7935      1:ord      1:ord       0.8  1
  7936      1:ord      1:ord       0.7  1
  7937      1:ord      1:ord       0.6  1
  7938      1:ord      1:ord       0.8  1
  7939      1:ord      1:ord       0.8  1
  7940      1:ord      1:ord       0.7  1
  7941      1:ord      1:ord       0.9  1
  7942      1:ord      1:ord       0.9  1
  7943      1:ord      1:ord       0.6  1
  7944      1:ord      1:ord       0.9  1
  7945      1:ord      1:ord       0.6  1
  7946      1:ord      1:ord       0.8  1
  7947      1:ord      1:ord       0.8  1
  7948      1:ord      2:dis   +   0.6  1
  7949      1:ord      1:ord       0.9  1
  7950      1:ord      1:ord       0.6  1
  7951      1:ord      1:ord       0.7  1
  7952      1:ord      1:ord       0.7  1
  7953      1:ord      1:ord       0.7  1
  7954      1:ord      1:ord       0.7  1
  7955      1:ord      1:ord       0.9  1
  7956      1:ord      1:ord       0.9  1
  7957      1:ord      1:ord       0.6  1
  7958      1:ord      1:ord       0.9  1
  7959      1:ord      1:ord       0.7  1
  7960      1:ord      1:ord       0.7  1
  7961      1:ord      2:dis   +   0.567  1
  7962      2:dis      2:dis       0.7  2
  7963      2:dis      2:dis       0.6  2
  7964      2:dis      2:dis       0.7  2
  7965      2:dis      2:dis       0.6  2
  7966      2:dis      2:dis       0.7  2
  7967      2:dis      2:dis       0.7  2
  7968      2:dis      1:ord   +   0.7  1
  7969      1:ord      1:ord       0.7  1
  7970      1:ord      1:ord       0.6  1
  7971      1:ord      1:ord       0.7  1
  7972      1:ord      1:ord       0.5  1
  7973      1:ord      1:ord       0.7  1
  7974      1:ord      1:ord       0.6  1
  7975      1:ord      1:ord       0.5  1
  7976      1:ord      1:ord       0.7  1
  7977      1:ord      1:ord       0.5  1
  7978      1:ord      1:ord       0.5  1
  7979      1:ord      2:dis   +   0.6  1
  7980      1:ord      1:ord       0.7  1
  7981      1:ord      1:ord       0.5  1
  7982      1:ord      1:ord       0.9  1
  7983      1:ord      1:ord       0.9  1
  7984      1:ord      1:ord       0.8  1
  7985      1:ord      1:ord       0.9  1
  7986      1:ord      1:ord       0.5  1
  7987      1:ord      2:dis   +   0.7  1
  7988      1:ord      2:dis   +   0.6  1
  7989      1:ord      1:ord       0.6  1
  7990      1:ord      1:ord       0.5  1
  7991      1:ord      1:ord       0.6  1
  7992      1:ord      2:dis   +   0.8  1
  7993      1:ord      1:ord       0.6  1
  7994      1:ord      1:ord       0.7  1
  7995      1:ord      1:ord       0.7  1
  7996      1:ord      1:ord       0.6  1
  7997      1:ord      1:ord       0.7  1
  7998      1:ord      2:dis   +   0.6  1
  7999      1:ord      1:ord       1  1
  8000      1:ord      1:ord       0.7  1
  8001      1:ord      1:ord       0.9  1
  8002      1:ord      1:ord       0.8  1
  8003      1:ord      1:ord       0.9  1
  8004      1:ord      1:ord       1  1
  8005      1:ord      1:ord       0.8  1
  8006      1:ord      1:ord       0.9  1
  8007      1:ord      1:ord       0.8  1
  8008      1:ord      1:ord       0.5  1
  8009      1:ord      1:ord       0.7  1
  8010      1:ord      1:ord       0.7  1
  8011      1:ord      1:ord       0.7  1
  8012      1:ord      1:ord       0.6  1
  8013      1:ord      1:ord       0.7  1
  8014      1:ord      1:ord       0.8  1
  8015      1:ord      1:ord       0.8  1
  8016      1:ord      1:ord       0.8  1
  8017      1:ord      1:ord       0.8  1
  8018      1:ord      1:ord       0.6  1
  8019      1:ord      1:ord       0.6  1
  8020      1:ord      1:ord       0.6  1
  8021      1:ord      1:ord       0.8  1
  8022      1:ord      1:ord       0.6  1
  8023      1:ord      1:ord       0.8  1
  8024      1:ord      2:dis   +   0.6  1
  8025      1:ord      1:ord       0.5  1
  8026      1:ord      1:ord       0.9  1
  8027      1:ord      2:dis   +   0.6  1
  8028      1:ord      1:ord       0.9  1
  8029      1:ord      2:dis   +   0.6  1
  8030      2:dis      2:dis       0.6  1
  8031      2:dis      1:ord   +   0.7  1
  8032      2:dis      1:ord   +   0.8  1
  8033      2:dis      1:ord   +   0.8  1
  8034      2:dis      1:ord   +   0.8  1
  8035      2:dis      1:ord   +   0.9  1
  8036      2:dis      1:ord   +   0.7  1
  8037      2:dis      1:ord   +   0.7  1
  8038      2:dis      1:ord   +   0.6  1
  8039      2:dis      1:ord   +   0.9  1
  8040      1:ord      1:ord       0.8  1
  8041      1:ord      1:ord       0.8  1
  8042      1:ord      2:dis   +   0.6  1
  8043      1:ord      1:ord       0.8  1
  8044      1:ord      1:ord       0.7  1
  8045      1:ord      2:dis   +   0.6  1
  8046      1:ord      1:ord       0.6  1
  8047      1:ord      1:ord       0.7  1
  8048      1:ord      1:ord       0.7  1
  8049      1:ord      2:dis   +   0.7  1
  8050      1:ord      1:ord       0.7  1
  8051      1:ord      1:ord       0.6  1
  8052      1:ord      1:ord       0.8  1
  8053      1:ord      1:ord       0.7  1
  8054      1:ord      1:ord       0.8  1
  8055      1:ord      1:ord       0.7  1
  8056      1:ord      1:ord       0.8  1
  8057      1:ord      1:ord       0.9  1
  8058      1:ord      1:ord       1  1
  8059      1:ord      1:ord       0.7  1
  8060      1:ord      1:ord       0.8  1
  8061      1:ord      1:ord       0.7  1
  8062      1:ord      1:ord       0.9  1
  8063      1:ord      1:ord       0.6  1
  8064      1:ord      1:ord       0.7  1
  8065      1:ord      1:ord       0.9  1
  8066      1:ord      1:ord       0.9  1
  8067      1:ord      1:ord       0.6  1
  8068      1:ord      1:ord       0.8  1
  8069      1:ord      1:ord       0.8  1
  8070      1:ord      1:ord       0.6  1
  8071      1:ord      1:ord       0.9  1
  8072      1:ord      1:ord       0.8  1
  8073      1:ord      1:ord       1  1
  8074      1:ord      1:ord       0.6  1
  8075      1:ord      1:ord       1  1
  8076      1:ord      1:ord       0.9  1
  8077      1:ord      1:ord       0.6  1
  8078      1:ord      1:ord       0.7  1
  8079      1:ord      1:ord       0.7  1
  8080      1:ord      1:ord       0.7  1
  8081      1:ord      1:ord       0.8  1
  8082      1:ord      1:ord       0.7  1
  8083      1:ord      1:ord       0.8  1
  8084      1:ord      1:ord       0.9  1
  8085      1:ord      1:ord       0.9  1
  8086      1:ord      1:ord       1  1
  8087      1:ord      1:ord       0.5  1
  8088      1:ord      1:ord       0.7  1
  8089      1:ord      1:ord       0.8  1
  8090      1:ord      1:ord       0.9  1
  8091      1:ord      1:ord       0.8  1
  8092      1:ord      1:ord       0.5  1
  8093      1:ord      1:ord       0.8  1
  8094      1:ord      1:ord       0.6  1
  8095      1:ord      1:ord       0.8  1
  8096      1:ord      1:ord       0.8  1
  8097      1:ord      2:dis   +   0.6  1
  8098      1:ord      1:ord       0.5  1
  8099      1:ord      2:dis   +   0.7  1
  8100      1:ord      2:dis   +   0.7  1
  8101      1:ord      2:dis   +   0.7  1
  8102      1:ord      2:dis   +   0.6  1
  8103      1:ord      1:ord       0.5  1
  8104      1:ord      1:ord       0.5  1
  8105      1:ord      2:dis   +   0.6  1
  8106      1:ord      1:ord       0.8  1
  8107      1:ord      1:ord       0.5  1
  8108      1:ord      1:ord       0.9  1
  8109      1:ord      1:ord       1  1
  8110      1:ord      1:ord       0.5  1
  8111      1:ord      1:ord       0.5  1
  8112      1:ord      1:ord       0.7  1
  8113      1:ord      2:dis   +   0.7  1
  8114      1:ord      1:ord       0.6  1
  8115      1:ord      2:dis   +   0.6  1
  8116      1:ord      1:ord       0.5  1
  8117      1:ord      1:ord       0.7  1
  8118      2:dis      2:dis       0.7  1
  8119      2:dis      2:dis       0.8  1
  8120      2:dis      1:ord   +   0.5  1
  8121      2:dis      1:ord   +   0.5  1
  8122      2:dis      1:ord   +   0.7  1
  8123      2:dis      1:ord   +   0.6  1
  8124      2:dis      2:dis       0.7  1
  8125      2:dis      1:ord   +   0.6  1
  8126      2:dis      1:ord   +   0.6  1
  8127      2:dis      2:dis       0.6  1
  8128      2:dis      1:ord   +   0.6  1
  8129      2:dis      1:ord   +   0.5  1
  8130      2:dis      1:ord   +   0.7  1
  8131      2:dis      1:ord   +   0.6  1
  8132      2:dis      1:ord   +   0.6  1
  8133      2:dis      2:dis       0.9  1
  8134      2:dis      1:ord   +   0.9  1
  8135      1:ord      1:ord       0.6  1
  8136      1:ord      2:dis   +   0.6  2
  8137      1:ord      2:dis   +   0.6  2
  8138      1:ord      2:dis   +   0.6  2
  8139      1:ord      1:ord       0.5  1
  8140      1:ord      2:dis   +   0.7  2
  8141      1:ord      2:dis   +   0.7  2
  8142      1:ord      1:ord       0.8  1
  8143      1:ord      1:ord       0.6  1
  8144      1:ord      1:ord       0.6  1
  8145      1:ord      1:ord       0.7  1
  8146      1:ord      1:ord       0.5  1
  8147      1:ord      2:dis   +   0.7  1
  8148      1:ord      1:ord       0.5  1
  8149      1:ord      1:ord       0.7  1
  8150      1:ord      2:dis   +   0.6  1
  8151      1:ord      1:ord       0.6  1
  8152      1:ord      2:dis   +   0.7  1
  8153      1:ord      1:ord       0.7  1
  8154      1:ord      1:ord       0.6  1
  8155      1:ord      1:ord       0.5  1
  8156      1:ord      1:ord       0.8  1
  8157      1:ord      1:ord       1  1
  8158      1:ord      1:ord       0.8  1
  8159      1:ord      1:ord       0.7  1
  8160      1:ord      1:ord       0.5  1
  8161      1:ord      1:ord       0.8  1
  8162      1:ord      1:ord       0.8  1
  8163      1:ord      1:ord       0.7  1
  8164      1:ord      1:ord       1  1
  8165      1:ord      1:ord       0.7  1
  8166      1:ord      1:ord       0.7  1
  8167      1:ord      1:ord       0.5  1
  8168      1:ord      1:ord       0.7  1
  8169      1:ord      1:ord       0.7  1
  8170      1:ord      1:ord       0.7  1
  8171      1:ord      1:ord       0.8  1
  8172      1:ord      1:ord       0.9  1
  8173      1:ord      1:ord       0.8  1
  8174      1:ord      1:ord       0.8  1
  8175      1:ord      1:ord       0.7  1
  8176      1:ord      1:ord       0.9  1
  8177      1:ord      1:ord       0.8  1
  8178      1:ord      1:ord       0.6  1
  8179      1:ord      1:ord       0.5  1
  8180      1:ord      1:ord       0.7  1
  8181      1:ord      1:ord       0.9  1
  8182      1:ord      1:ord       0.9  1
  8183      1:ord      1:ord       0.8  1
  8184      1:ord      1:ord       0.7  1
  8185      1:ord      1:ord       0.8  1
  8186      1:ord      1:ord       0.5  1
  8187      1:ord      1:ord       1  1
  8188      1:ord      1:ord       0.9  1
  8189      1:ord      1:ord       0.8  1
  8190      1:ord      1:ord       0.8  1
  8191      1:ord      1:ord       0.6  1
  8192      1:ord      1:ord       0.8  1
  8193      1:ord      1:ord       0.7  1
  8194      1:ord      1:ord       0.8  1
  8195      1:ord      1:ord       0.8  1
  8196      1:ord      1:ord       0.9  1
  8197      1:ord      1:ord       1  1
  8198      1:ord      1:ord       0.7  1
  8199      1:ord      1:ord       0.9  1
  8200      1:ord      1:ord       0.8  1
  8201      1:ord      1:ord       0.9  1
  8202      1:ord      1:ord       0.5  1
  8203      1:ord      1:ord       0.9  1
  8204      1:ord      2:dis   +   0.6  1
  8205      1:ord      1:ord       0.6  1
  8206      1:ord      1:ord       0.7  1
  8207      1:ord      1:ord       0.7  1
  8208      1:ord      1:ord       0.5  1
  8209      1:ord      1:ord       0.6  1
  8210      1:ord      1:ord       0.5  1
  8211      1:ord      1:ord       0.7  1
  8212      1:ord      2:dis   +   0.7  1
  8213      1:ord      1:ord       0.5  1
  8214      1:ord      1:ord       0.7  1
  8215      1:ord      1:ord       0.6  1
  8216      1:ord      2:dis   +   0.6  1
  8217      1:ord      1:ord       0.7  1
  8218      1:ord      1:ord       0.7  1
  8219      1:ord      1:ord       0.7  1
  8220      1:ord      1:ord       0.9  1
  8221      1:ord      1:ord       0.7  1
  8222      1:ord      1:ord       0.9  1
  8223      1:ord      1:ord       0.6  1
  8224      1:ord      1:ord       0.6  1
  8225      1:ord      1:ord       0.5  1
  8226      1:ord      1:ord       0.7  1
  8227      1:ord      1:ord       0.6  1
  8228      1:ord      1:ord       0.5  1
  8229      1:ord      1:ord       0.8  1
  8230      1:ord      1:ord       0.9  1
  8231      1:ord      1:ord       0.8  1
  8232      1:ord      1:ord       0.9  1
  8233      1:ord      1:ord       0.8  1
  8234      1:ord      1:ord       0.7  1
  8235      1:ord      1:ord       0.9  1
  8236      1:ord      1:ord       0.9  1
  8237      1:ord      1:ord       0.9  1
  8238      1:ord      1:ord       0.8  1
  8239      1:ord      1:ord       0.8  1
  8240      1:ord      1:ord       0.6  1
  8241      1:ord      1:ord       0.7  1
  8242      1:ord      1:ord       0.7  1
  8243      1:ord      1:ord       0.7  1
  8244      1:ord      1:ord       0.6  1
  8245      1:ord      1:ord       0.7  1
  8246      1:ord      1:ord       0.7  1
  8247      1:ord      1:ord       0.6  1
  8248      1:ord      2:dis   +   0.6  1
  8249      1:ord      1:ord       0.7  1
  8250      1:ord      1:ord       0.7  1
  8251      1:ord      1:ord       0.5  1
  8252      1:ord      1:ord       0.5  1
  8253      1:ord      1:ord       0.6  1
  8254      1:ord      1:ord       0.5  1
  8255      1:ord      1:ord       0.5  1
  8256      1:ord      1:ord       0.7  1
  8257      1:ord      1:ord       0.6  1
  8258      1:ord      1:ord       0.5  1
  8259      1:ord      1:ord       0.8  1
  8260      1:ord      1:ord       0.7  1
  8261      1:ord      1:ord       0.9  1
  8262      1:ord      1:ord       0.8  1
  8263      1:ord      1:ord       0.9  1
  8264      1:ord      1:ord       0.8  1
  8265      1:ord      1:ord       0.9  1
  8266      1:ord      1:ord       0.9  1
  8267      1:ord      1:ord       0.9  1
  8268      1:ord      1:ord       0.8  1
  8269      1:ord      1:ord       0.9  1
  8270      1:ord      1:ord       0.7  1
  8271      1:ord      1:ord       0.9  1
  8272      1:ord      1:ord       0.8  1
  8273      1:ord      1:ord       0.9  1
  8274      1:ord      1:ord       0.9  1
  8275      1:ord      1:ord       0.9  1
  8276      1:ord      2:dis   +   0.6  1
  8277      1:ord      1:ord       0.7  1
  8278      1:ord      1:ord       0.8  1
  8279      1:ord      1:ord       0.6  1
  8280      1:ord      1:ord       0.6  1
  8281      1:ord      1:ord       0.7  1
  8282      1:ord      1:ord       1  1
  8283      1:ord      1:ord       0.6  1
  8284      1:ord      1:ord       0.8  1
  8285      1:ord      1:ord       0.6  1
  8286      1:ord      1:ord       0.6  1
  8287      1:ord      1:ord       0.5  1
  8288      1:ord      1:ord       0.6  1
  8289      1:ord      1:ord       0.6  1
  8290      1:ord      1:ord       0.7  1
  8291      1:ord      1:ord       0.9  1
  8292      1:ord      1:ord       0.9  1
  8293      1:ord      1:ord       0.9  1
  8294      1:ord      1:ord       0.7  1
  8295      1:ord      1:ord       0.9  1
  8296      1:ord      1:ord       0.8  1
  8297      1:ord      1:ord       0.6  1
  8298      1:ord      1:ord       0.6  1
  8299      1:ord      1:ord       0.8  1
  8300      1:ord      1:ord       0.7  1
  8301      1:ord      1:ord       0.9  1
  8302      1:ord      1:ord       0.7  1
  8303      1:ord      1:ord       0.7  1
  8304      1:ord      1:ord       0.8  1
  8305      1:ord      1:ord       0.8  1
  8306      1:ord      1:ord       0.6  1
  8307      1:ord      1:ord       0.9  1
  8308      1:ord      2:dis   +   0.6  1
  8309      1:ord      1:ord       0.7  1
  8310      1:ord      1:ord       0.9  1
  8311      1:ord      1:ord       1  1
  8312      1:ord      1:ord       0.8  1
  8313      1:ord      1:ord       0.9  1
  8314      1:ord      1:ord       0.7  1
  8315      1:ord      1:ord       0.6  1
  8316      1:ord      1:ord       0.9  1
  8317      1:ord      1:ord       0.6  1
  8318      1:ord      1:ord       0.7  1
  8319      1:ord      1:ord       0.7  1
  8320      1:ord      1:ord       0.7  1
  8321      1:ord      1:ord       0.7  1
  8322      1:ord      1:ord       0.7  1
  8323      1:ord      1:ord       0.5  1
  8324      1:ord      1:ord       0.8  1
  8325      1:ord      1:ord       0.5  1
  8326      1:ord      1:ord       0.7  1
  8327      1:ord      1:ord       0.7  1
  8328      1:ord      1:ord       0.6  1
  8329      1:ord      1:ord       0.5  1
  8330      1:ord      2:dis   +   0.6  1
  8331      1:ord      2:dis   +   0.7  1
  8332      1:ord      1:ord       0.5  1
  8333      1:ord      2:dis   +   0.6  1
  8334      1:ord      1:ord       0.6  1
  8335      1:ord      1:ord       0.6  1
  8336      1:ord      2:dis   +   0.6  1
  8337      1:ord      2:dis   +   0.6  1
  8338      1:ord      1:ord       0.5  1
  8339      1:ord      1:ord       0.7  1
  8340      1:ord      2:dis   +   0.8  1
  8341      1:ord      1:ord       0.5  1
  8342      1:ord      1:ord       0.7  1
  8343      1:ord      1:ord       0.7  1
  8344      1:ord      1:ord       0.8  1
  8345      1:ord      1:ord       0.7  1
  8346      1:ord      1:ord       0.5  1
  8347      1:ord      1:ord       0.8  1
  8348      1:ord      2:dis   +   0.8  1
  8349      1:ord      1:ord       0.8  1
  8350      1:ord      1:ord       0.9  1
  8351      1:ord      1:ord       1  1
  8352      1:ord      1:ord       0.7  1
  8353      1:ord      1:ord       0.7  1
  8354      1:ord      1:ord       0.8  1
  8355      1:ord      1:ord       0.6  1
  8356      1:ord      1:ord       0.7  1
  8357      1:ord      1:ord       0.8  1
  8358      1:ord      1:ord       0.8  1
  8359      1:ord      1:ord       1  1
  8360      1:ord      1:ord       0.8  1
  8361      1:ord      1:ord       0.8  1
  8362      1:ord      1:ord       0.8  1
  8363      1:ord      1:ord       0.8  1
  8364      1:ord      1:ord       0.8  1
  8365      1:ord      1:ord       0.7  1
  8366      1:ord      1:ord       1  1
  8367      1:ord      1:ord       0.8  1
  8368      1:ord      1:ord       0.7  1
  8369      1:ord      1:ord       1  1
  8370      1:ord      1:ord       0.8  1
  8371      1:ord      1:ord       0.7  1
  8372      1:ord      1:ord       0.6  1
  8373      1:ord      1:ord       0.8  1
  8374      1:ord      1:ord       0.7  1
  8375      1:ord      1:ord       0.7  1
  8376      1:ord      1:ord       0.8  1
  8377      1:ord      2:dis   +   0.6  1
  8378      1:ord      1:ord       1  1
  8379      1:ord      1:ord       0.5  1
  8380      1:ord      1:ord       0.7  1
  8381      1:ord      1:ord       0.9  1
  8382      1:ord      1:ord       0.9  1
  8383      1:ord      2:dis   +   0.6  1
  8384      1:ord      1:ord       0.6  1
  8385      1:ord      1:ord       0.7  1
  8386      1:ord      1:ord       0.8  1
  8387      1:ord      1:ord       0.6  1
  8388      1:ord      1:ord       0.6  1
  8389      1:ord      1:ord       0.7  1
  8390      1:ord      1:ord       0.7  1
  8391      1:ord      1:ord       0.9  1
  8392      1:ord      1:ord       0.8  1
  8393      1:ord      1:ord       0.5  1
  8394      1:ord      1:ord       0.6  1
  8395      1:ord      2:dis   +   0.6  1
  8396      1:ord      1:ord       0.7  1
  8397      1:ord      1:ord       0.7  1
  8398      1:ord      1:ord       0.7  1
  8399      1:ord      1:ord       0.6  1
  8400      1:ord      1:ord       0.8  1
  8401      1:ord      1:ord       0.7  1
  8402      1:ord      1:ord       0.9  1
  8403      1:ord      1:ord       0.8  1
  8404      1:ord      1:ord       0.5  1
  8405      1:ord      1:ord       0.6  1
  8406      1:ord      1:ord       0.9  1
  8407      1:ord      1:ord       0.7  1
  8408      1:ord      1:ord       0.7  1
  8409      1:ord      1:ord       1  1
  8410      1:ord      1:ord       0.7  1
  8411      1:ord      1:ord       0.8  1
  8412      1:ord      1:ord       0.7  1
  8413      1:ord      1:ord       0.9  1
  8414      1:ord      1:ord       0.5  1
  8415      1:ord      1:ord       0.7  1
  8416      1:ord      1:ord       1  1
  8417      1:ord      1:ord       0.7  1
  8418      1:ord      1:ord       0.8  1
  8419      1:ord      1:ord       0.9  1
  8420      1:ord      1:ord       0.9  1
  8421      1:ord      1:ord       1  1
  8422      1:ord      1:ord       0.9  1
  8423      1:ord      1:ord       0.9  1
  8424      1:ord      1:ord       0.7  1
  8425      1:ord      1:ord       0.8  1
  8426      1:ord      1:ord       0.9  1
  8427      1:ord      1:ord       0.85  1
  8428      1:ord      1:ord       0.7  1
  8429      1:ord      1:ord       1  1
  8430      1:ord      1:ord       0.7  1
  8431      1:ord      1:ord       0.7  1
  8432      1:ord      1:ord       0.6  1
  8433      1:ord      1:ord       0.6  1
  8434      1:ord      1:ord       0.6  1
  8435      1:ord      1:ord       1  1
  8436      1:ord      1:ord       0.7  1
  8437      1:ord      1:ord       0.7  1
  8438      1:ord      2:dis   +   0.6  1
  8439      1:ord      1:ord       0.6  1
  8440      1:ord      1:ord       0.6  1
  8441      1:ord      1:ord       0.7  1
  8442      1:ord      1:ord       0.6  1
  8443      1:ord      1:ord       0.5  1
  8444      1:ord      1:ord       0.8  1
  8445      1:ord      2:dis   +   0.7  1
  8446      2:dis      1:ord   +   0.6  1
  8447      2:dis      1:ord   +   0.5  1
  8448      2:dis      2:dis       0.7  2
  8449      2:dis      1:ord   +   0.7  1
  8450      2:dis      1:ord   +   0.5  1
  8451      2:dis      1:ord   +   0.5  1
  8452      2:dis      1:ord   +   0.5  1
  8453      2:dis      2:dis       0.8  1
  8454      2:dis      1:ord   +   0.6  1
  8455      2:dis      1:ord   +   0.5  1
  8456      2:dis      1:ord   +   0.567  1
  8457      2:dis      2:dis       0.7  1
  8458      2:dis      2:dis       0.8  1
  8459      2:dis      1:ord   +   0.5  1
  8460      2:dis      2:dis       0.9  2
  8461      2:dis      2:dis       0.7  2
  8462      2:dis      2:dis       0.8  2
  8463      2:dis      2:dis       0.6  2
  8464      2:dis      2:dis       0.7  2
  8465      2:dis      2:dis       0.6  2
  8466      2:dis      1:ord   +   0.6  2
  8467      2:dis      1:ord   +   0.6  2
  8468      2:dis      1:ord   +   0.8  2
  8469      2:dis      2:dis       0.6  2
  8470      2:dis      1:ord   +   0.5  2
  8471      2:dis      1:ord   +   0.6  2
  8472      2:dis      2:dis       0.6  2
  8473      2:dis      1:ord   +   0.9  1
  8474      2:dis      1:ord   +   0.9  1
  8475      2:dis      1:ord   +   0.8  1
  8476      2:dis      1:ord   +   0.6  1
  8477      2:dis      1:ord   +   0.7  1
  8478      2:dis      1:ord   +   0.8  1
  8479      2:dis      1:ord   +   0.7  1
  8480      2:dis      1:ord   +   0.6  1
  8481      2:dis      1:ord   +   0.5  1
  8482      2:dis      1:ord   +   0.8  1
  8483      2:dis      1:ord   +   0.6  1
  8484      2:dis      1:ord   +   0.7  1
  8485      2:dis      1:ord   +   0.6  1
  8486      2:dis      1:ord   +   0.5  1
  8487      2:dis      1:ord   +   0.6  1
  8488      2:dis      2:dis       0.7  1
  8489      2:dis      1:ord   +   0.7  1
  8490      2:dis      1:ord   +   0.5  1
  8491      2:dis      1:ord   +   0.5  1
  8492      2:dis      1:ord   +   0.6  1
  8493      2:dis      2:dis       0.6  1
  8494      2:dis      1:ord   +   0.8  1
  8495      2:dis      2:dis       0.6  1
  8496      2:dis      1:ord   +   0.7  1
  8497      2:dis      1:ord   +   0.8  1
  8498      2:dis      1:ord   +   0.5  1
  8499      2:dis      1:ord   +   0.7  1
  8500      2:dis      1:ord   +   0.8  1
  8501      2:dis      2:dis       0.7  1
  8502      2:dis      1:ord   +   0.5  1
  8503      2:dis      1:ord   +   0.5  1
  8504      2:dis      1:ord   +   0.5  1
  8505      2:dis      1:ord   +   0.9  1
  8506      2:dis      2:dis       0.6  1
  8507      2:dis      2:dis       0.7  1
  8508      2:dis      2:dis       0.8  1
  8509      2:dis      2:dis       0.7  1
  8510      2:dis      1:ord   +   0.6  1
  8511      2:dis      2:dis       0.6  1
  8512      2:dis      1:ord   +   0.6  1
  8513      2:dis      1:ord   +   0.7  1
  8514      2:dis      2:dis       0.6  1
  8515      2:dis      1:ord   +   0.6  1
  8516      2:dis      1:ord   +   0.6  1
  8517      2:dis      1:ord   +   0.5  1
  8518      2:dis      2:dis       0.6  1
  8519      2:dis      2:dis       0.6  1
  8520      2:dis      1:ord   +   0.5  1
  8521      2:dis      2:dis       0.7  1
  8522      2:dis      1:ord   +   0.7  1
  8523      2:dis      1:ord   +   0.7  1
  8524      2:dis      1:ord   +   0.5  1
  8525      2:dis      2:dis       0.6  1
  8526      2:dis      1:ord   +   0.5  1
  8527      2:dis      2:dis       0.8  1
  8528      2:dis      1:ord   +   0.7  1
  8529      2:dis      1:ord   +   0.5  1
  8530      2:dis      1:ord   +   0.5  1
  8531      2:dis      1:ord   +   0.6  1
  8532      2:dis      1:ord   +   0.6  1
  8533      2:dis      1:ord   +   0.6  1
  8534      2:dis      1:ord   +   0.9  1
  8535      2:dis      1:ord   +   0.5  1
  8536      2:dis      1:ord   +   0.8  1
  8537      2:dis      1:ord   +   0.8  1
  8538      2:dis      1:ord   +   0.5  1
  8539      1:ord      1:ord       0.9  1
  8540      1:ord      1:ord       0.7  1
  8541      1:ord      1:ord       0.8  1
  8542      1:ord      1:ord       0.8  1
  8543      1:ord      1:ord       0.9  1
  8544      1:ord      1:ord       0.9  1
  8545      1:ord      1:ord       0.9  1
  8546      1:ord      1:ord       0.9  1
  8547      1:ord      1:ord       0.9  1
  8548      1:ord      1:ord       0.9  1
  8549      1:ord      1:ord       1  1
  8550      1:ord      1:ord       1  1
  8551      1:ord      1:ord       0.8  1
  8552      1:ord      1:ord       1  1
  8553      1:ord      1:ord       0.8  1
  8554      1:ord      1:ord       0.8  1
  8555      1:ord      1:ord       0.9  1
  8556      1:ord      1:ord       0.6  1
  8557      1:ord      1:ord       0.9  1
  8558      1:ord      1:ord       0.7  1
  8559      1:ord      1:ord       0.8  1
  8560      1:ord      1:ord       0.8  1
  8561      1:ord      1:ord       0.7  1
  8562      1:ord      1:ord       0.7  1
  8563      1:ord      2:dis   +   1  2
  8564      1:ord      2:dis   +   0.6  2
  8565      1:ord      2:dis   +   0.8  2
  8566      1:ord      2:dis   +   0.9  2
  8567      1:ord      2:dis   +   0.8  2
  8568      1:ord      2:dis   +   0.8  2
  8569      1:ord      1:ord       0.5  2
  8570      1:ord      2:dis   +   0.9  2
  8571      1:ord      2:dis   +   0.8  2
  8572      1:ord      2:dis   +   0.8  2
  8573      1:ord      2:dis   +   0.9  2
  8574      1:ord      2:dis   +   0.9  2
  8575      1:ord      2:dis   +   0.7  2
  8576      1:ord      2:dis   +   1  2
  8577      1:ord      2:dis   +   0.8  2
  8578      1:ord      2:dis   +   0.7  2
  8579      1:ord      2:dis   +   0.7  2
  8580      1:ord      2:dis   +   0.8  2
  8581      1:ord      2:dis   +   0.8  2
  8582      1:ord      2:dis   +   0.6  2
  8583      1:ord      1:ord       0.8  1
  8584      1:ord      1:ord       0.5  1
  8585      1:ord      1:ord       0.5  1
  8586      1:ord      1:ord       0.5  1
  8587      1:ord      2:dis   +   0.6  1
  8588      1:ord      1:ord       0.7  1
  8589      1:ord      1:ord       0.5  1
  8590      1:ord      1:ord       0.8  1
  8591      1:ord      1:ord       0.6  1
  8592      1:ord      1:ord       0.8  1
  8593      1:ord      1:ord       0.5  1
  8594      1:ord      1:ord       0.8  1
  8595      1:ord      1:ord       0.7  1
  8596      1:ord      1:ord       0.6  1
  8597      1:ord      1:ord       0.7  1
  8598      1:ord      1:ord       0.7  1
  8599      1:ord      1:ord       1  1
  8600      1:ord      1:ord       0.7  1
  8601      1:ord      1:ord       0.8  1
  8602      1:ord      1:ord       0.6  1
  8603      1:ord      1:ord       0.7  1
  8604      1:ord      1:ord       0.5  1
  8605      1:ord      1:ord       0.8  1
  8606      1:ord      1:ord       0.7  1
  8607      1:ord      1:ord       0.6  1
  8608      1:ord      1:ord       1  1
  8609      1:ord      1:ord       0.9  1
  8610      1:ord      1:ord       0.9  1
  8611      1:ord      1:ord       0.9  1
  8612      1:ord      1:ord       0.8  1
  8613      1:ord      1:ord       0.6  1
  8614      1:ord      1:ord       0.7  1
  8615      1:ord      1:ord       0.8  1
  8616      1:ord      1:ord       0.6  1
  8617      1:ord      1:ord       0.5  1
  8618      1:ord      1:ord       0.6  1
  8619      1:ord      1:ord       0.8  1
  8620      1:ord      1:ord       0.6  1
  8621      1:ord      2:dis   +   0.6  1
  8622      1:ord      1:ord       0.5  1
  8623      1:ord      1:ord       0.8  1
  8624      1:ord      1:ord       0.6  1
  8625      1:ord      1:ord       0.7  1
  8626      1:ord      1:ord       0.6  1
  8627      1:ord      1:ord       0.8  1
  8628      1:ord      1:ord       1  1
  8629      1:ord      1:ord       0.6  1
  8630      1:ord      1:ord       0.7  1
  8631      1:ord      1:ord       0.7  1
  8632      1:ord      1:ord       0.5  1
  8633      1:ord      1:ord       0.9  1
  8634      1:ord      1:ord       0.9  1
  8635      1:ord      1:ord       0.7  1
  8636      1:ord      1:ord       0.6  1
  8637      1:ord      2:dis   +   0.6  1
  8638      1:ord      2:dis   +   0.6  1
  8639      1:ord      1:ord       0.7  1
  8640      1:ord      1:ord       0.5  1
  8641      1:ord      1:ord       0.8  1
  8642      1:ord      1:ord       0.5  1
  8643      1:ord      1:ord       0.7  1
  8644      1:ord      1:ord       0.9  1
  8645      1:ord      1:ord       0.6  1
  8646      1:ord      1:ord       0.8  1
  8647      1:ord      1:ord       1  1
  8648      1:ord      1:ord       0.9  1
  8649      1:ord      1:ord       0.7  1
  8650      1:ord      1:ord       0.9  1
  8651      1:ord      1:ord       0.8  1
  8652      1:ord      1:ord       0.8  1
  8653      1:ord      1:ord       0.8  1
  8654      1:ord      1:ord       0.5  1
  8655      1:ord      1:ord       0.7  1
  8656      1:ord      1:ord       0.7  1
  8657      1:ord      1:ord       0.9  1
  8658      1:ord      1:ord       0.9  1
  8659      1:ord      1:ord       0.6  1
  8660      1:ord      1:ord       0.7  1
  8661      1:ord      1:ord       0.7  1
  8662      1:ord      1:ord       0.6  1
  8663      1:ord      1:ord       0.8  1
  8664      1:ord      1:ord       0.8  1
  8665      1:ord      1:ord       1  1
  8666      1:ord      1:ord       0.7  1
  8667      1:ord      1:ord       0.9  1
  8668      1:ord      1:ord       0.5  1
  8669      1:ord      1:ord       0.8  1
  8670      1:ord      1:ord       0.8  1
  8671      1:ord      1:ord       0.8  1
  8672      1:ord      1:ord       1  1
  8673      1:ord      1:ord       1  1
  8674      1:ord      1:ord       1  1
  8675      1:ord      1:ord       0.9  1
  8676      1:ord      1:ord       0.9  1
  8677      1:ord      1:ord       0.9  1
  8678      1:ord      2:dis   +   0.6  1
  8679      1:ord      1:ord       0.6  1
  8680      1:ord      1:ord       0.5  1
  8681      1:ord      1:ord       0.9  1
  8682      1:ord      1:ord       1  1
  8683      1:ord      1:ord       0.9  1
  8684      1:ord      1:ord       0.8  1
  8685      1:ord      1:ord       0.8  1
  8686      1:ord      1:ord       0.6  1
  8687      1:ord      1:ord       1  1
  8688      1:ord      2:dis   +   0.6  1
  8689      1:ord      1:ord       0.7  1
  8690      1:ord      1:ord       1  1
  8691      1:ord      1:ord       0.9  1
  8692      1:ord      2:dis   +   0.6  1
  8693      1:ord      1:ord       0.9  1
  8694      1:ord      1:ord       0.5  1
  8695      1:ord      1:ord       0.9  1
  8696      1:ord      1:ord       0.8  1
  8697      1:ord      1:ord       0.7  1
  8698      1:ord      1:ord       0.7  1
  8699      1:ord      1:ord       0.7  1
  8700      1:ord      1:ord       0.5  1
  8701      1:ord      1:ord       0.6  1
  8702      1:ord      1:ord       0.6  1
  8703      1:ord      1:ord       1  1
  8704      1:ord      1:ord       0.7  1
  8705      1:ord      1:ord       0.7  1
  8706      1:ord      1:ord       0.8  1
  8707      1:ord      1:ord       0.9  1
  8708      1:ord      1:ord       0.7  1
  8709      1:ord      1:ord       0.9  1
  8710      1:ord      1:ord       1  1
  8711      1:ord      1:ord       0.9  1
  8712      1:ord      1:ord       0.7  1
  8713      1:ord      1:ord       0.9  1
  8714      1:ord      1:ord       0.8  1
  8715      1:ord      1:ord       0.7  1
  8716      1:ord      1:ord       0.9  1
  8717      1:ord      1:ord       0.7  1
  8718      1:ord      1:ord       0.7  1
  8719      1:ord      1:ord       0.8  1
  8720      1:ord      1:ord       0.8  1
  8721      1:ord      2:dis   +   0.6  1
  8722      1:ord      1:ord       0.6  1
  8723      1:ord      1:ord       0.7  1
  8724      1:ord      1:ord       0.8  1
  8725      1:ord      1:ord       0.7  1
  8726      1:ord      1:ord       0.9  1
  8727      1:ord      1:ord       0.7  1
  8728      1:ord      1:ord       0.6  1
  8729      1:ord      1:ord       0.7  1
  8730      1:ord      1:ord       0.6  1
  8731      1:ord      1:ord       0.9  1
  8732      1:ord      1:ord       0.8  1
  8733      1:ord      1:ord       0.8  1
  8734      1:ord      1:ord       0.7  1
  8735      1:ord      1:ord       0.9  1
  8736      1:ord      1:ord       0.7  1
  8737      1:ord      1:ord       0.8  1
  8738      1:ord      1:ord       0.9  1
  8739      1:ord      1:ord       0.8  1
  8740      1:ord      2:dis   +   0.6  1
  8741      1:ord      1:ord       0.7  1
  8742      1:ord      1:ord       0.5  1
  8743      1:ord      1:ord       0.7  1
  8744      1:ord      1:ord       0.8  1
  8745      1:ord      1:ord       0.9  1
  8746      1:ord      1:ord       0.8  1
  8747      1:ord      1:ord       0.6  1
  8748      1:ord      2:dis   +   0.6  1
  8749      1:ord      1:ord       0.7  1
  8750      1:ord      1:ord       0.8  1
  8751      1:ord      1:ord       0.7  1
  8752      1:ord      1:ord       0.8  1
  8753      1:ord      1:ord       0.5  1
  8754      1:ord      1:ord       0.7  1
  8755      1:ord      1:ord       0.8  1
  8756      1:ord      1:ord       0.5  1
  8757      1:ord      1:ord       0.6  1
  8758      1:ord      1:ord       0.5  1
  8759      1:ord      1:ord       0.8  1
  8760      1:ord      1:ord       0.7  1
  8761      1:ord      1:ord       0.6  1
  8762      1:ord      1:ord       0.5  1
  8763      1:ord      1:ord       0.5  1
  8764      1:ord      1:ord       0.7  1
  8765      1:ord      1:ord       0.5  1
  8766      1:ord      1:ord       0.5  1
  8767      1:ord      1:ord       0.8  1
  8768      1:ord      1:ord       0.7  1
  8769      1:ord      1:ord       0.6  1
  8770      1:ord      1:ord       0.7  1
  8771      1:ord      1:ord       0.5  1
  8772      1:ord      1:ord       0.7  1
  8773      1:ord      1:ord       0.9  1
  8774      1:ord      1:ord       0.8  1
  8775      1:ord      1:ord       0.7  1
  8776      1:ord      1:ord       1  1
  8777      1:ord      1:ord       0.7  1
  8778      1:ord      1:ord       0.9  1
  8779      1:ord      1:ord       0.5  1
  8780      1:ord      1:ord       0.7  1
  8781      1:ord      1:ord       1  1
  8782      1:ord      1:ord       0.7  1
  8783      1:ord      1:ord       0.8  1
  8784      1:ord      1:ord       0.8  1
  8785      1:ord      1:ord       1  1
  8786      1:ord      1:ord       0.9  1
  8787      1:ord      1:ord       1  1
  8788      1:ord      1:ord       0.9  1
  8789      1:ord      1:ord       1  1
  8790      1:ord      1:ord       0.8  1
  8791      1:ord      1:ord       0.8  1
  8792      1:ord      1:ord       0.9  1
  8793      1:ord      1:ord       0.7  1
  8794      1:ord      1:ord       0.7  1
  8795      1:ord      1:ord       0.6  1
  8796      1:ord      2:dis   +   0.6  1
  8797      1:ord      1:ord       0.9  1
  8798      1:ord      1:ord       0.7  1
  8799      1:ord      1:ord       0.8  1
  8800      1:ord      1:ord       0.5  1
  8801      1:ord      1:ord       0.8  1
  8802      1:ord      1:ord       0.6  1
  8803      1:ord      1:ord       0.6  1
  8804      1:ord      1:ord       0.7  1
  8805      1:ord      1:ord       0.9  1
  8806      1:ord      1:ord       0.6  1
  8807      1:ord      1:ord       0.5  1
  8808      1:ord      1:ord       0.5  1
  8809      1:ord      1:ord       0.8  1
  8810      1:ord      1:ord       0.8  1
  8811      1:ord      2:dis   +   0.8  1
  8812      1:ord      1:ord       0.8  1
  8813      1:ord      1:ord       0.6  1
  8814      1:ord      1:ord       0.6  1
  8815      1:ord      1:ord       0.8  1
  8816      1:ord      1:ord       0.5  1
  8817      1:ord      1:ord       0.5  1
  8818      1:ord      1:ord       0.6  1
  8819      1:ord      1:ord       0.6  1
  8820      1:ord      1:ord       0.8  1
  8821      1:ord      1:ord       0.7  1
  8822      1:ord      1:ord       0.5  1
  8823      1:ord      1:ord       0.6  1
  8824      1:ord      1:ord       0.8  1
  8825      1:ord      1:ord       0.7  1
  8826      1:ord      1:ord       0.9  1
  8827      1:ord      1:ord       0.8  1
  8828      1:ord      1:ord       0.7  1
  8829      1:ord      1:ord       0.6  1
  8830      1:ord      1:ord       0.7  1
  8831      1:ord      1:ord       0.6  1
  8832      1:ord      2:dis   +   0.6  1
  8833      1:ord      1:ord       0.6  1
  8834      1:ord      1:ord       0.6  1
  8835      1:ord      1:ord       0.7  1
  8836      1:ord      1:ord       0.8  1
  8837      1:ord      1:ord       0.9  1
  8838      1:ord      1:ord       0.6  1
  8839      1:ord      1:ord       0.7  1
  8840      1:ord      1:ord       0.5  1
  8841      1:ord      1:ord       0.7  1
  8842      1:ord      1:ord       0.7  1
  8843      1:ord      1:ord       0.6  1
  8844      1:ord      1:ord       0.5  1
  8845      1:ord      1:ord       0.6  1
  8846      1:ord      1:ord       0.5  1
  8847      1:ord      2:dis   +   0.6  1
  8848      1:ord      1:ord       0.8  1
  8849      1:ord      1:ord       0.9  1
  8850      1:ord      1:ord       0.5  1
  8851      1:ord      1:ord       0.7  1
  8852      1:ord      1:ord       0.5  1
  8853      1:ord      1:ord       0.8  1
  8854      1:ord      1:ord       0.8  1
  8855      1:ord      1:ord       0.8  1
  8856      1:ord      1:ord       0.6  1
  8857      1:ord      2:dis   +   0.6  1
  8858      1:ord      1:ord       0.7  1
  8859      1:ord      1:ord       0.8  1
  8860      1:ord      1:ord       0.8  1
  8861      1:ord      1:ord       0.9  1
  8862      1:ord      1:ord       0.8  1
  8863      1:ord      1:ord       0.5  1
  8864      1:ord      1:ord       0.7  1
  8865      1:ord      1:ord       0.7  1
  8866      1:ord      1:ord       0.6  1
  8867      1:ord      1:ord       0.9  1
  8868      1:ord      1:ord       0.7  1
  8869      1:ord      1:ord       0.7  1
  8870      1:ord      1:ord       1  1
  8871      1:ord      1:ord       0.7  1
  8872      1:ord      1:ord       0.9  1
  8873      1:ord      1:ord       0.9  1
  8874      1:ord      1:ord       1  1
  8875      1:ord      1:ord       0.7  1
  8876      1:ord      1:ord       0.7  1
  8877      1:ord      1:ord       0.6  1
  8878      1:ord      1:ord       0.6  1
  8879      1:ord      1:ord       0.7  1
  8880      1:ord      1:ord       0.8  1
  8881      1:ord      1:ord       0.8  1
  8882      1:ord      1:ord       0.5  1
  8883      1:ord      1:ord       0.6  1
  8884      1:ord      1:ord       0.8  1
  8885      1:ord      1:ord       0.8  1
  8886      1:ord      1:ord       0.9  1
  8887      1:ord      2:dis   +   0.6  1
  8888      1:ord      1:ord       0.8  1
  8889      1:ord      1:ord       0.6  1
  8890      1:ord      1:ord       0.5  1
  8891      2:dis      1:ord   +   0.8  1
  8892      2:dis      1:ord   +   0.8  1
  8893      2:dis      1:ord   +   0.8  1
  8894      2:dis      1:ord   +   0.5  1
  8895      2:dis      1:ord   +   0.7  1
  8896      2:dis      1:ord   +   0.6  1
  8897      2:dis      1:ord   +   0.8  1
  8898      2:dis      1:ord   +   0.7  1
  8899      2:dis      1:ord   +   0.6  1
  8900      2:dis      2:dis       0.6  1
  8901      2:dis      1:ord   +   0.7  1
  8902      2:dis      2:dis       0.7  1
  8903      2:dis      1:ord   +   0.7  1
  8904      2:dis      1:ord   +   0.5  1
  8905      1:ord      1:ord       0.7  1
  8906      1:ord      1:ord       0.5  1
  8907      1:ord      1:ord       0.6  1
  8908      1:ord      1:ord       0.8  1
  8909      1:ord      1:ord       0.7  1
  8910      1:ord      1:ord       0.5  1
  8911      1:ord      1:ord       0.7  1
  8912      1:ord      1:ord       0.6  1
  8913      1:ord      1:ord       0.6  1
  8914      1:ord      1:ord       0.8  1
  8915      1:ord      2:dis   +   0.7  1
  8916      1:ord      1:ord       0.9  1
  8917      1:ord      1:ord       0.6  1
  8918      1:ord      1:ord       0.6  1
  8919      1:ord      1:ord       0.8  1
  8920      1:ord      1:ord       0.7  1
  8921      1:ord      2:dis   +   0.6  1
  8922      1:ord      1:ord       0.5  1
  8923      1:ord      1:ord       0.6  1
  8924      1:ord      1:ord       0.7  1
  8925      1:ord      2:dis   +   0.7  1
  8926      1:ord      1:ord       0.6  1
  8927      1:ord      1:ord       0.6  1
  8928      2:dis      1:ord   +   0.5  1
  8929      2:dis      1:ord   +   0.8  1
  8930      2:dis      2:dis       0.6  1
  8931      2:dis      1:ord   +   0.6  1
  8932      2:dis      2:dis       0.7  1
  8933      2:dis      1:ord   +   0.5  1
  8934      2:dis      1:ord   +   0.9  1
  8935      1:ord      1:ord       0.8  1
  8936      1:ord      1:ord       0.8  1
  8937      1:ord      1:ord       0.5  1
  8938      1:ord      1:ord       0.8  1
  8939      1:ord      1:ord       0.8  1
  8940      1:ord      1:ord       0.5  1
  8941      1:ord      1:ord       0.6  1
  8942      1:ord      1:ord       0.5  1
  8943      1:ord      1:ord       0.6  1
  8944      1:ord      1:ord       0.6  1
  8945      1:ord      1:ord       0.6  1
  8946      1:ord      1:ord       0.6  1
  8947      1:ord      1:ord       0.7  1
  8948      1:ord      1:ord       0.7  1
  8949      1:ord      1:ord       0.8  1
  8950      1:ord      1:ord       0.8  1
  8951      1:ord      1:ord       0.8  1
  8952      1:ord      1:ord       0.6  1
  8953      1:ord      1:ord       0.5  1
  8954      1:ord      1:ord       0.7  1
  8955      1:ord      1:ord       0.8  1
  8956      1:ord      1:ord       0.9  1
  8957      1:ord      1:ord       0.7  1
  8958      1:ord      1:ord       0.8  1
  8959      1:ord      1:ord       0.9  1
  8960      1:ord      1:ord       0.7  1
  8961      1:ord      1:ord       0.9  1
  8962      1:ord      1:ord       0.9  1
  8963      1:ord      1:ord       0.7  1
  8964      1:ord      1:ord       0.5  1
  8965      1:ord      1:ord       0.8  1
  8966      1:ord      1:ord       0.9  1
  8967      1:ord      1:ord       1  1
  8968      1:ord      1:ord       0.8  1
  8969      1:ord      1:ord       0.8  1
  8970      1:ord      1:ord       0.7  1
  8971      1:ord      1:ord       1  1
  8972      1:ord      1:ord       0.7  1
  8973      1:ord      1:ord       0.8  1
  8974      1:ord      1:ord       0.7  1
  8975      1:ord      1:ord       0.8  1
  8976      1:ord      1:ord       0.8  1
  8977      1:ord      1:ord       0.8  1
  8978      1:ord      1:ord       0.6  1
  8979      1:ord      1:ord       0.7  1
  8980      1:ord      1:ord       0.9  1
  8981      1:ord      2:dis   +   0.6  1
  8982      1:ord      2:dis   +   0.8  1
  8983      1:ord      1:ord       0.6  1
  8984      1:ord      1:ord       0.6  1
  8985      1:ord      1:ord       0.7  1
  8986      1:ord      2:dis   +   0.6  1
  8987      1:ord      2:dis   +   0.6  1
  8988      1:ord      1:ord       0.6  1
  8989      1:ord      1:ord       0.6  1
  8990      1:ord      1:ord       0.5  1
  8991      1:ord      1:ord       0.7  1
  8992      1:ord      1:ord       0.5  1
  8993      1:ord      1:ord       0.7  1
  8994      1:ord      1:ord       0.9  1
  8995      1:ord      1:ord       0.6  1
  8996      1:ord      1:ord       0.8  1
  8997      1:ord      1:ord       0.7  1
  8998      1:ord      1:ord       0.7  1
  8999      1:ord      1:ord       0.8  1
  9000      1:ord      1:ord       0.9  1
  9001      1:ord      1:ord       0.7  1
  9002      1:ord      1:ord       0.7  1
  9003      1:ord      1:ord       0.9  1
  9004      1:ord      1:ord       0.5  1
  9005      1:ord      1:ord       0.6  1
  9006      1:ord      2:dis   +   0.6  1
  9007      1:ord      1:ord       0.8  1
  9008      1:ord      1:ord       0.6  1
  9009      1:ord      1:ord       0.6  1
  9010      1:ord      1:ord       0.6  1
  9011      1:ord      1:ord       0.7  1
  9012      1:ord      1:ord       0.6  1
  9013      1:ord      1:ord       0.9  1
  9014      1:ord      1:ord       0.7  1
  9015      1:ord      1:ord       1  1
  9016      1:ord      1:ord       0.6  1
  9017      1:ord      1:ord       0.9  1
  9018      1:ord      1:ord       0.5  1
  9019      1:ord      2:dis   +   0.7  1
  9020      1:ord      2:dis   +   0.6  1
  9021      1:ord      2:dis   +   0.6  1
  9022      1:ord      1:ord       0.5  1
  9023      1:ord      1:ord       0.6  1
  9024      1:ord      1:ord       0.8  1
  9025      1:ord      2:dis   +   0.6  1
  9026      1:ord      1:ord       0.7  1
  9027      1:ord      1:ord       0.7  1
  9028      1:ord      1:ord       0.8  1
  9029      1:ord      1:ord       0.5  1
  9030      1:ord      1:ord       0.6  1
  9031      1:ord      1:ord       0.8  1
  9032      1:ord      1:ord       0.7  1
  9033      1:ord      1:ord       0.8  1
  9034      1:ord      1:ord       0.6  1
  9035      1:ord      1:ord       0.7  1
  9036      1:ord      1:ord       0.8  1
  9037      1:ord      1:ord       0.7  1
  9038      1:ord      2:dis   +   0.7  1
  9039      1:ord      1:ord       0.5  1
  9040      1:ord      1:ord       0.8  1
  9041      1:ord      1:ord       0.5  1
  9042      1:ord      2:dis   +   0.6  1
  9043      1:ord      1:ord       0.7  1
  9044      1:ord      1:ord       0.5  1
  9045      1:ord      1:ord       0.5  1
  9046      1:ord      1:ord       0.55  1
  9047      1:ord      1:ord       0.7  1
  9048      1:ord      1:ord       0.5  1
  9049      1:ord      2:dis   +   0.8  1
  9050      1:ord      2:dis   +   0.7  1
  9051      1:ord      2:dis   +   0.6  1
  9052      1:ord      1:ord       0.6  1
  9053      1:ord      2:dis   +   0.6  1
  9054      1:ord      1:ord       0.5  1
  9055      1:ord      2:dis   +   0.6  1
  9056      1:ord      2:dis   +   0.7  1
  9057      1:ord      1:ord       0.6  1
  9058      1:ord      1:ord       0.5  1
  9059      1:ord      1:ord       0.6  1
  9060      1:ord      2:dis   +   0.6  1
  9061      1:ord      1:ord       0.8  1
  9062      1:ord      2:dis   +   0.6  1
  9063      1:ord      1:ord       0.6  1
  9064      1:ord      2:dis   +   0.8  1
  9065      1:ord      1:ord       0.7  1
  9066      1:ord      1:ord       0.6  1
  9067      1:ord      2:dis   +   0.6  1
  9068      1:ord      2:dis   +   0.55  1
  9069      1:ord      1:ord       0.6  1
  9070      1:ord      2:dis   +   0.7  1
  9071      1:ord      1:ord       0.5  1
  9072      1:ord      1:ord       0.5  1
  9073      1:ord      1:ord       0.5  1
  9074      1:ord      1:ord       0.8  1
  9075      1:ord      2:dis   +   0.6  1
  9076      1:ord      2:dis   +   0.6  1
  9077      1:ord      2:dis   +   0.6  1
  9078      1:ord      2:dis   +   0.8  1
  9079      1:ord      1:ord       0.7  1
  9080      1:ord      1:ord       0.5  1
  9081      1:ord      2:dis   +   0.6  1
  9082      1:ord      2:dis   +   0.6  1
  9083      1:ord      1:ord       0.5  1
  9084      1:ord      1:ord       0.6  1
  9085      1:ord      1:ord       0.6  1
  9086      1:ord      1:ord       0.5  1
  9087      1:ord      1:ord       0.6  1
  9088      1:ord      1:ord       0.6  1
  9089      1:ord      1:ord       0.5  1
  9090      1:ord      1:ord       0.8  1
  9091      1:ord      1:ord       0.8  1
  9092      1:ord      1:ord       0.8  1
  9093      1:ord      1:ord       0.9  1
  9094      1:ord      1:ord       0.7  1
  9095      1:ord      1:ord       0.8  1
  9096      1:ord      1:ord       0.9  1
  9097      1:ord      1:ord       0.8  1
  9098      1:ord      1:ord       0.9  1
  9099      1:ord      1:ord       1  1
  9100      1:ord      1:ord       1  1
  9101      1:ord      1:ord       0.6  1
  9102      1:ord      1:ord       0.8  1
  9103      1:ord      1:ord       1  1
  9104      1:ord      1:ord       0.7  1
  9105      1:ord      1:ord       0.6  1
  9106      1:ord      1:ord       0.7  1
  9107      1:ord      1:ord       0.8  1
  9108      1:ord      1:ord       1  1
  9109      1:ord      1:ord       0.8  1
  9110      1:ord      1:ord       0.8  1
  9111      1:ord      1:ord       0.5  1
  9112      1:ord      1:ord       0.7  1
  9113      1:ord      1:ord       0.8  1
  9114      1:ord      1:ord       0.7  1
  9115      1:ord      1:ord       0.7  1
  9116      1:ord      1:ord       0.7  1
  9117      1:ord      1:ord       0.6  1
  9118      1:ord      1:ord       0.7  1
  9119      1:ord      1:ord       0.6  1
  9120      1:ord      2:dis   +   0.6  1
  9121      1:ord      1:ord       0.5  1
  9122      1:ord      1:ord       0.5  1
  9123      1:ord      1:ord       0.7  1
  9124      1:ord      1:ord       0.5  1
  9125      1:ord      2:dis   +   0.6  1
  9126      1:ord      2:dis   +   0.9  2
  9127      1:ord      1:ord       0.7  1
  9128      1:ord      1:ord       0.5  1
  9129      1:ord      2:dis   +   0.9  2
  9130      1:ord      1:ord       0.5  1
  9131      1:ord      1:ord       0.6  1
  9132      1:ord      2:dis   +   0.9  2
  9133      1:ord      2:dis   +   0.6  2
  9134      1:ord      1:ord       0.5  1
  9135      1:ord      1:ord       0.6  1
  9136      1:ord      1:ord       0.6  1
  9137      1:ord      2:dis   +   0.7  2
  9138      1:ord      2:dis   +   0.7  2
  9139      1:ord      2:dis   +   0.8  2
  9140      1:ord      1:ord       0.5  1
  9141      1:ord      2:dis   +   0.7  2
  9142      1:ord      2:dis   +   0.8  2
  9143      1:ord      1:ord       0.5  1
  9144      1:ord      2:dis   +   0.9  2
  9145      1:ord      2:dis   +   0.9  2
  9146      1:ord      2:dis   +   0.6  2
  9147      1:ord      2:dis   +   0.8  2
  9148      1:ord      2:dis   +   0.8  2
  9149      1:ord      2:dis   +   0.8  2
  9150      1:ord      2:dis   +   0.7  2
  9151      1:ord      2:dis   +   0.7  2
  9152      1:ord      2:dis   +   0.9  2
  9153      1:ord      2:dis   +   0.9  2
  9154      1:ord      2:dis   +   0.7  2
  9155      1:ord      2:dis   +   0.8  2
  9156      1:ord      2:dis   +   0.8  2
  9157      1:ord      2:dis   +   0.7  2
  9158      1:ord      2:dis   +   0.9  2
  9159      1:ord      2:dis   +   0.7  2
  9160      1:ord      2:dis   +   0.7  2
  9161      1:ord      2:dis   +   0.9  2
  9162      1:ord      2:dis   +   1  2
  9163      1:ord      2:dis   +   0.8  2
  9164      1:ord      2:dis   +   1  2
  9165      1:ord      2:dis   +   0.7  2
  9166      1:ord      2:dis   +   0.9  2
  9167      1:ord      2:dis   +   0.9  2
  9168      1:ord      1:ord       0.5  2
  9169      1:ord      2:dis   +   0.6  2
  9170      1:ord      2:dis   +   0.8  2
  9171      1:ord      2:dis   +   0.8  2
  9172      1:ord      2:dis   +   0.6  2
  9173      1:ord      2:dis   +   0.8  2
  9174      1:ord      2:dis   +   0.8  2
  9175      1:ord      2:dis   +   1  2
  9176      1:ord      2:dis   +   0.7  2
  9177      1:ord      1:ord       0.6  2
  9178      1:ord      2:dis   +   0.9  2
  9179      1:ord      2:dis   +   0.9  2
  9180      1:ord      1:ord       0.5  2
  9181      1:ord      2:dis   +   0.7  2
  9182      1:ord      2:dis   +   0.8  2
  9183      1:ord      2:dis   +   0.8  2
  9184      1:ord      2:dis   +   0.6  2
  9185      1:ord      2:dis   +   0.7  2
  9186      1:ord      2:dis   +   0.7  2
  9187      1:ord      1:ord       0.5  2
  9188      1:ord      2:dis   +   0.9  2
  9189      1:ord      2:dis   +   0.7  2
  9190      1:ord      2:dis   +   0.8  2
  9191      1:ord      2:dis   +   0.8  2
  9192      1:ord      2:dis   +   0.7  2
  9193      1:ord      2:dis   +   1  2
  9194      1:ord      2:dis   +   0.9  2
  9195      1:ord      2:dis   +   0.8  2
  9196      1:ord      2:dis   +   0.9  2
  9197      1:ord      2:dis   +   0.9  2
  9198      1:ord      2:dis   +   0.8  2
  9199      1:ord      2:dis   +   0.6  2
  9200      1:ord      2:dis   +   0.9  2
  9201      1:ord      2:dis   +   0.6  2
  9202      1:ord      2:dis   +   0.7  2
  9203      1:ord      2:dis   +   0.8  2
  9204      1:ord      2:dis   +   0.7  2
  9205      1:ord      2:dis   +   0.6  2
  9206      1:ord      2:dis   +   0.9  2
  9207      1:ord      2:dis   +   0.9  2
  9208      1:ord      2:dis   +   0.7  2
  9209      1:ord      2:dis   +   0.8  2
  9210      1:ord      2:dis   +   0.8  2
  9211      1:ord      2:dis   +   0.7  2
  9212      1:ord      2:dis   +   0.8  2
  9213      1:ord      2:dis   +   0.8  2
  9214      1:ord      2:dis   +   0.9  2
  9215      1:ord      2:dis   +   0.8  2
  9216      1:ord      2:dis   +   0.9  2
  9217      1:ord      1:ord       0.5  2
  9218      1:ord      2:dis   +   0.6  2
  9219      1:ord      2:dis   +   0.7  2
  9220      1:ord      2:dis   +   0.9  2
  9221      1:ord      2:dis   +   0.8  2
  9222      1:ord      2:dis   +   0.8  2
  9223      1:ord      2:dis   +   0.6  2
  9224      1:ord      2:dis   +   0.9  2
  9225      1:ord      1:ord       0.5  2
  9226      1:ord      2:dis   +   0.6  2
  9227      1:ord      2:dis   +   0.8  2
  9228      1:ord      2:dis   +   0.9  2
  9229      1:ord      1:ord       0.5  2
  9230      1:ord      2:dis   +   0.9  2
  9231      1:ord      2:dis   +   0.7  2
  9232      1:ord      2:dis   +   0.8  2
  9233      1:ord      2:dis   +   0.9  2
  9234      1:ord      2:dis   +   0.8  2
  9235      1:ord      2:dis   +   1  2
  9236      1:ord      2:dis   +   0.7  2
  9237      1:ord      2:dis   +   0.8  2
  9238      1:ord      2:dis   +   0.9  2
  9239      1:ord      2:dis   +   0.7  2
  9240      1:ord      2:dis   +   0.8  2
  9241      1:ord      2:dis   +   0.7  2
  9242      1:ord      2:dis   +   1  2
  9243      1:ord      2:dis   +   0.8  2
  9244      1:ord      2:dis   +   1  2
  9245      1:ord      2:dis   +   0.9  2
  9246      1:ord      2:dis   +   0.8  2
  9247      1:ord      2:dis   +   0.8  2
  9248      1:ord      2:dis   +   0.7  2
  9249      1:ord      2:dis   +   0.9  2
  9250      1:ord      2:dis   +   0.9  2
  9251      1:ord      2:dis   +   0.9  2
  9252      1:ord      2:dis   +   0.8  2
  9253      1:ord      2:dis   +   0.8  2
  9254      1:ord      2:dis   +   0.9  2
  9255      1:ord      2:dis   +   0.7  2
  9256      1:ord      2:dis   +   0.7  2
  9257      1:ord      2:dis   +   0.7  2
  9258      1:ord      2:dis   +   0.9  2
  9259      1:ord      2:dis   +   0.7  2
  9260      1:ord      2:dis   +   0.7  2
  9261      1:ord      2:dis   +   0.9  2
  9262      1:ord      2:dis   +   0.8  2
  9263      1:ord      2:dis   +   0.9  2
  9264      1:ord      2:dis   +   0.9  2
  9265      1:ord      2:dis   +   0.7  2
  9266      1:ord      2:dis   +   0.9  2
  9267      1:ord      2:dis   +   0.8  2
  9268      1:ord      2:dis   +   0.8  2
  9269      1:ord      2:dis   +   0.9  2
  9270      1:ord      2:dis   +   0.8  2
  9271      1:ord      1:ord       0.5  2
  9272      1:ord      2:dis   +   0.9  2
  9273      1:ord      2:dis   +   0.8  2
  9274      1:ord      2:dis   +   0.8  2
  9275      1:ord      2:dis   +   0.8  2
  9276      1:ord      2:dis   +   0.8  2
  9277      1:ord      2:dis   +   0.9  2
  9278      1:ord      2:dis   +   0.8  2
  9279      1:ord      2:dis   +   0.8  2
  9280      1:ord      2:dis   +   0.9  2
  9281      1:ord      2:dis   +   0.7  2
  9282      1:ord      2:dis   +   0.8  2
  9283      1:ord      2:dis   +   0.9  2
  9284      1:ord      2:dis   +   0.8  2
  9285      1:ord      2:dis   +   0.8  2
  9286      1:ord      2:dis   +   0.7  2
  9287      1:ord      2:dis   +   0.8  2
  9288      1:ord      2:dis   +   1  2
  9289      1:ord      2:dis   +   0.7  2
  9290      1:ord      2:dis   +   0.7  2
  9291      1:ord      2:dis   +   0.8  2
  9292      1:ord      2:dis   +   0.9  2
  9293      1:ord      2:dis   +   1  2
  9294      1:ord      2:dis   +   0.9  2
  9295      1:ord      2:dis   +   0.8  2
  9296      1:ord      2:dis   +   0.7  2
  9297      1:ord      2:dis   +   0.8  2
  9298      1:ord      2:dis   +   0.9  2
  9299      1:ord      2:dis   +   0.8  2
  9300      1:ord      2:dis   +   0.9  2
  9301      1:ord      2:dis   +   0.7  2
  9302      1:ord      2:dis   +   0.8  2
  9303      1:ord      2:dis   +   1  2
  9304      1:ord      2:dis   +   1  2
  9305      1:ord      2:dis   +   0.9  2
  9306      1:ord      2:dis   +   0.7  2
  9307      1:ord      2:dis   +   1  2
  9308      1:ord      2:dis   +   0.8  2
  9309      1:ord      2:dis   +   0.8  2
  9310      1:ord      2:dis   +   0.9  2
  9311      1:ord      2:dis   +   0.9  2
  9312      1:ord      2:dis   +   0.9  2
  9313      1:ord      2:dis   +   0.8  2
  9314      1:ord      2:dis   +   0.9  2
  9315      1:ord      2:dis   +   1  2
  9316      1:ord      2:dis   +   1  2
  9317      1:ord      2:dis   +   0.7  2
  9318      1:ord      2:dis   +   0.6  2
  9319      1:ord      2:dis   +   1  2
  9320      1:ord      2:dis   +   0.9  2
  9321      1:ord      2:dis   +   0.9  2
  9322      1:ord      2:dis   +   1  2
  9323      1:ord      2:dis   +   0.6  2
  9324      1:ord      2:dis   +   1  2
  9325      1:ord      2:dis   +   0.7  2
  9326      1:ord      2:dis   +   0.8  2
  9327      1:ord      2:dis   +   0.9  2
  9328      1:ord      2:dis   +   0.9  2
  9329      1:ord      2:dis   +   0.9  2
  9330      1:ord      2:dis   +   1  2
  9331      1:ord      2:dis   +   0.7  2
  9332      1:ord      2:dis   +   0.8  2
  9333      1:ord      2:dis   +   0.8  2
  9334      1:ord      2:dis   +   1  2
  9335      1:ord      2:dis   +   0.9  2
  9336      1:ord      2:dis   +   0.7  2
  9337      1:ord      2:dis   +   0.8  2
  9338      1:ord      2:dis   +   0.6  2
  9339      1:ord      2:dis   +   1  2
  9340      1:ord      2:dis   +   0.9  2
  9341      1:ord      2:dis   +   0.7  2
  9342      1:ord      2:dis   +   1  2
  9343      1:ord      2:dis   +   0.7  2
  9344      1:ord      2:dis   +   0.9  2
  9345      1:ord      2:dis   +   0.9  2
  9346      1:ord      2:dis   +   0.7  2
  9347      1:ord      2:dis   +   0.9  2
  9348      1:ord      2:dis   +   0.7  2
  9349      1:ord      2:dis   +   0.8  2
  9350      1:ord      2:dis   +   0.9  2
  9351      1:ord      2:dis   +   0.8  2
  9352      1:ord      2:dis   +   0.8  2
  9353      1:ord      2:dis   +   1  2
  9354      1:ord      2:dis   +   0.9  2
  9355      1:ord      2:dis   +   1  2
  9356      1:ord      2:dis   +   0.8  2
  9357      1:ord      2:dis   +   0.8  2
  9358      1:ord      2:dis   +   0.9  2
  9359      1:ord      2:dis   +   0.7  2
  9360      1:ord      2:dis   +   0.8  2
  9361      1:ord      2:dis   +   0.8  2
  9362      1:ord      2:dis   +   0.7  2
  9363      1:ord      2:dis   +   0.7  2
  9364      1:ord      2:dis   +   0.9  2
  9365      1:ord      2:dis   +   1  2
  9366      1:ord      2:dis   +   0.7  2
  9367      1:ord      2:dis   +   0.9  2
  9368      1:ord      2:dis   +   0.8  2
  9369      1:ord      2:dis   +   0.7  2
  9370      1:ord      2:dis   +   0.8  2
  9371      1:ord      2:dis   +   0.7  2
  9372      1:ord      2:dis   +   0.7  2
  9373      1:ord      1:ord       0.6  2
  9374      1:ord      2:dis   +   1  2
  9375      1:ord      2:dis   +   0.8  2
  9376      1:ord      2:dis   +   0.9  2
  9377      1:ord      2:dis   +   0.8  2
  9378      1:ord      2:dis   +   0.9  2
  9379      1:ord      2:dis   +   0.9  2
  9380      1:ord      1:ord       0.6  2
  9381      1:ord      2:dis   +   0.9  2
  9382      1:ord      2:dis   +   0.8  2
  9383      1:ord      2:dis   +   0.7  2
  9384      1:ord      2:dis   +   0.9  2
  9385      1:ord      2:dis   +   0.8  2
  9386      1:ord      2:dis   +   1  2
  9387      1:ord      2:dis   +   0.6  2
  9388      1:ord      2:dis   +   0.7  2
  9389      1:ord      2:dis   +   1  2
  9390      1:ord      2:dis   +   0.9  2
  9391      1:ord      2:dis   +   0.8  2
  9392      1:ord      2:dis   +   1  2
  9393      1:ord      2:dis   +   0.9  2
  9394      1:ord      2:dis   +   0.7  2
  9395      1:ord      2:dis   +   1  2
  9396      1:ord      2:dis   +   0.8  2
  9397      1:ord      2:dis   +   1  2
  9398      1:ord      2:dis   +   0.8  2
  9399      1:ord      2:dis   +   1  2
  9400      1:ord      2:dis   +   0.9  2
  9401      1:ord      2:dis   +   0.6  2
  9402      1:ord      2:dis   +   0.7  2
  9403      1:ord      2:dis   +   0.6  2
  9404      1:ord      2:dis   +   0.8  2
  9405      1:ord      2:dis   +   0.9  2
  9406      1:ord      2:dis   +   0.8  2
  9407      1:ord      2:dis   +   1  2
  9408      1:ord      2:dis   +   0.9  2
  9409      1:ord      2:dis   +   0.9  2
  9410      1:ord      2:dis   +   0.9  2
  9411      1:ord      2:dis   +   0.9  2
  9412      1:ord      2:dis   +   0.7  2
  9413      1:ord      2:dis   +   0.8  2
  9414      1:ord      2:dis   +   0.8  2
  9415      1:ord      2:dis   +   0.8  2
  9416      1:ord      2:dis   +   0.6  2
  9417      1:ord      2:dis   +   0.9  2
  9418      1:ord      2:dis   +   0.9  2
  9419      1:ord      2:dis   +   0.8  2
  9420      1:ord      2:dis   +   1  2
  9421      1:ord      1:ord       0.5  2
  9422      1:ord      2:dis   +   0.6  2
  9423      1:ord      2:dis   +   0.9  2
  9424      1:ord      2:dis   +   0.9  2
  9425      1:ord      2:dis   +   0.9  2
  9426      1:ord      2:dis   +   0.7  2
  9427      1:ord      2:dis   +   0.7  2
  9428      1:ord      2:dis   +   0.9  2
  9429      1:ord      2:dis   +   0.8  2
  9430      1:ord      2:dis   +   0.9  2
  9431      1:ord      2:dis   +   0.9  2
  9432      1:ord      2:dis   +   0.8  2
  9433      1:ord      2:dis   +   0.8  2
  9434      1:ord      2:dis   +   0.9  2
  9435      1:ord      2:dis   +   1  2
  9436      1:ord      2:dis   +   0.8  2
  9437      1:ord      2:dis   +   0.8  2
  9438      1:ord      2:dis   +   0.8  2
  9439      1:ord      2:dis   +   1  2
  9440      1:ord      2:dis   +   0.6  2
  9441      1:ord      2:dis   +   0.9  2
  9442      1:ord      2:dis   +   0.7  2
  9443      1:ord      2:dis   +   0.6  2
  9444      1:ord      2:dis   +   1  2
  9445      1:ord      2:dis   +   0.8  2
  9446      1:ord      2:dis   +   1  2
  9447      1:ord      2:dis   +   1  2
  9448      1:ord      2:dis   +   0.9  2
  9449      1:ord      2:dis   +   0.8  2
  9450      1:ord      2:dis   +   0.9  2
  9451      1:ord      2:dis   +   0.8  2
  9452      1:ord      2:dis   +   0.7  2
  9453      1:ord      2:dis   +   0.7  2
  9454      1:ord      2:dis   +   1  2
  9455      1:ord      2:dis   +   0.9  2
  9456      1:ord      2:dis   +   0.8  2
  9457      1:ord      2:dis   +   1  2
  9458      1:ord      2:dis   +   0.9  2
  9459      1:ord      2:dis   +   0.9  2
  9460      1:ord      2:dis   +   0.6  2
  9461      1:ord      2:dis   +   0.8  2
  9462      1:ord      2:dis   +   1  2
  9463      1:ord      2:dis   +   0.9  2
  9464      1:ord      1:ord       0.5  2
  9465      1:ord      2:dis   +   0.9  2
  9466      1:ord      2:dis   +   0.6  2
  9467      1:ord      2:dis   +   1  2
  9468      1:ord      2:dis   +   1  2
  9469      1:ord      2:dis   +   0.9  2
  9470      1:ord      2:dis   +   0.9  2
  9471      1:ord      2:dis   +   0.6  2
  9472      1:ord      2:dis   +   0.6  2
  9473      1:ord      2:dis   +   0.8  2
  9474      1:ord      2:dis   +   1  2
  9475      1:ord      2:dis   +   0.8  2
  9476      1:ord      2:dis   +   0.7  2
  9477      1:ord      2:dis   +   0.9  2
  9478      1:ord      2:dis   +   0.8  2
  9479      1:ord      2:dis   +   0.9  2
  9480      1:ord      2:dis   +   0.8  2
  9481      1:ord      2:dis   +   0.9  2
  9482      1:ord      2:dis   +   0.7  2
  9483      1:ord      2:dis   +   0.8  2
  9484      1:ord      2:dis   +   0.8  2
  9485      1:ord      2:dis   +   0.9  2
  9486      1:ord      2:dis   +   0.7  2
  9487      1:ord      2:dis   +   0.7  2
  9488      1:ord      2:dis   +   0.8  2
  9489      1:ord      2:dis   +   0.8  2
  9490      1:ord      2:dis   +   1  2
  9491      1:ord      2:dis   +   1  2
  9492      1:ord      2:dis   +   0.6  2
  9493      1:ord      2:dis   +   0.7  2
  9494      1:ord      2:dis   +   0.9  2
  9495      1:ord      2:dis   +   0.9  2
  9496      1:ord      2:dis   +   1  2
  9497      1:ord      2:dis   +   0.9  2
  9498      1:ord      2:dis   +   0.8  2
  9499      1:ord      2:dis   +   0.9  2
  9500      1:ord      2:dis   +   0.9  2
  9501      1:ord      2:dis   +   0.9  2
  9502      1:ord      2:dis   +   0.7  2
  9503      1:ord      2:dis   +   0.9  2
  9504      1:ord      2:dis   +   0.9  2
  9505      1:ord      2:dis   +   0.9  2
  9506      1:ord      2:dis   +   0.8  2
  9507      1:ord      2:dis   +   0.9  2
  9508      1:ord      2:dis   +   0.9  2
  9509      1:ord      2:dis   +   1  2
  9510      1:ord      2:dis   +   0.9  2
  9511      1:ord      2:dis   +   0.9  2
  9512      1:ord      2:dis   +   0.8  2
  9513      1:ord      2:dis   +   0.8  2
  9514      1:ord      2:dis   +   0.9  2
  9515      1:ord      2:dis   +   0.7  2
  9516      1:ord      2:dis   +   1  2
  9517      1:ord      2:dis   +   0.8  2
  9518      1:ord      2:dis   +   1  2
  9519      1:ord      2:dis   +   0.9  2
  9520      1:ord      2:dis   +   1  2
  9521      1:ord      2:dis   +   0.8  2
  9522      1:ord      2:dis   +   0.8  2
  9523      1:ord      2:dis   +   0.9  2
  9524      1:ord      2:dis   +   0.9  2
  9525      1:ord      2:dis   +   1  2
  9526      1:ord      2:dis   +   0.9  2
  9527      1:ord      2:dis   +   0.9  2
  9528      1:ord      2:dis   +   0.9  2
  9529      1:ord      2:dis   +   0.6  2
  9530      1:ord      2:dis   +   1  2
  9531      1:ord      2:dis   +   0.8  2
  9532      1:ord      2:dis   +   0.8  2
  9533      1:ord      2:dis   +   0.7  2
  9534      1:ord      2:dis   +   0.9  2
  9535      1:ord      2:dis   +   1  2
  9536      1:ord      2:dis   +   0.8  2
  9537      1:ord      2:dis   +   0.9  2
  9538      1:ord      2:dis   +   0.9  2
  9539      1:ord      2:dis   +   0.9  2
  9540      1:ord      2:dis   +   1  2
  9541      1:ord      2:dis   +   0.9  2
  9542      1:ord      2:dis   +   0.6  2
  9543      1:ord      2:dis   +   0.9  2
  9544      1:ord      2:dis   +   0.7  2
  9545      1:ord      2:dis   +   0.8  2
[truncated: 2,380,038 more chars]
